# Supplementary material for: Transgenic Overexpression of Myocilin Leads to Variable Ocular Anterior Segment and Retinal Alterations Associated with Extracellular Matrix Abnormalities in Adult Zebrafish
Source: Preprints.org preprint supplement (doi:10.20944/preprints202208.0053.v1), 2022-08-02
Supplement: Supplementary file 1 [file supplementary]

**Transgenic overexpression of myocilin leads to variable ocular anterior segment and retinal alterations associated with extracellular matrix abnormalities in adult zebrafish**

Raquel Atiénzar-Aroca<sup>1,2</sup>, Jesús-José Ferre-Fernández<sup>1</sup>, Angel Tevar<sup>1,2</sup>, Juan-Manuel Bonet-Fernández<sup>1,2,3</sup>, María-José Cabañero<sup>1,2,3</sup>, María-José Ruiz-Pastor<sup>3,4</sup>, Nicolás Cuenca<sup>3,4</sup>, José-Daniel Aroca-Aguilar<sup>1,2,3</sup> and Julio Escribano<sup>1,2,3\*</sup>

<sup>1</sup>Área de Genética, Facultad de Medicina de Albacete, Universidad de Castilla-La Mancha, Albacete, Spain

<sup>2</sup>Instituto de Investigación en Discapacidades Neurológicas (IDINE), Universidad de Castilla-La Mancha, Albacete, Spain

<sup>3</sup>Cooperative Research Network on Age-Related Ocular Pathology, Visual and Life Quality (OFTARED), Instituto de Salud Carlos III, Madrid, Spain

<sup>4</sup> Department of Physiology, Genetics and Microbiology, University of Alicante, Alicante, Spain

\*Corresponding author: Julio Escribano, PhD, Área de Genética, Facultad de Medicina, Avda. de Almansa, 14, 02006-Albacete, Spain. E-Mail: julio.escribano@uclm.es

**Supplementary Table S1.** Primers used in RT-qPCR.

| Gene            | Forward primer (5'→3') | Reverse primer (5'→3')        | Amplicon size (pb) |
|-----------------|------------------------|-------------------------------|--------------------|
| <i>angptl3</i>  | TCACAAGAGGCCAGAAAACCAG | CTCCCTCCTCTGGATGACAGT         | 119                |
| <i>arhgef40</i> | CCGTCTGAACTCTGCCTTT    | GTTGGGTCGATTCTGTCTGAT         | 106                |
| <i>bfsp2</i>    | GCCGAGACAGAATCGATCA    | CCTCCAGCTTTCCGATAACA          | 118                |
| <i>cav2</i>     | GAGGTTCAGGACAGAGATCCTA | AGCATGACTACCAATCCAAACT        | 120                |
| <i>ccdc24</i>   | TGTTGCTGCTCACTCTGAGG   | TGTTGCCAGTGCATAACTT           | 105                |
| <i>crybgx</i>   | CGACTGGACCTGACCTCTGA   | CCCCTGGAAGTTGTCATGTT          | 120                |
| <i>ef1α</i>     | CTGGAGGCCAGCTCAAACAT   | ATCAAGAAGAGTAGTACCGCTAGCATTAC | 87                 |
| <i>myoc</i>     | CAAAAAGACAACAGTTCAGACC | GACCACAGCCGTCAACTC            | 149                |
| <i>lgsn</i>     | AGACAGTTCAGCTCGATTCT   | CTGCACTTGCATGGTCAAC           | 117                |
| <i>vangl2</i>   | CCCAGTCTACAATCCTGCTTTA | GACTGACCCGTCGAGTTATTAG        | 120                |

**Supplementary Table S2.** Top-50 downregulated genes in altered eyes of old (two years) male myoc transgenic zebrafish identified in the transcriptomic study. *DEGs* that coincided in the two comparisons of the ocular transgenic transcriptome (Tg) with each of the two wild type (WT) ocular transcriptomes were selected. Differential expression threshold: foldchange <-2; read count>20. p-value<0.05.

| Gene symbol             | Gene ID   | Identification                                   | Fold-change (Tg vs WT) | p-value | Read count |           |
|-------------------------|-----------|--------------------------------------------------|------------------------|---------|------------|-----------|
|                         |           |                                                  |                        |         | Tg/+       | WT (mean) |
| <i>crybgx</i>           | 553474    | crystallin beta gamma X                          | -217.3                 | 1.5E-50 | 420        | 76915     |
| <i>bfsp2</i>            | 494090    | beaded filament structural protein 2, phakinin   | -206.4                 | 6.1E-56 | 835        | 145492    |
| <i>lenep</i>            | 100002665 | lens epithelial protein                          | -153.8                 | 1.8E-49 | 486        | 63188     |
| <i>crygm5</i>           | 474328    | crystallin, gamma M5                             | -130.3                 | 1.2E-31 | 365        | 40142     |
| <i>crygm2c</i>          | 493628    | crystallin, gamma M2c                            | -109.0                 | 5.2E-22 | 1103       | 101352    |
| <i>crygm7</i>           | 553967    | crystallin, gamma M7                             | -104.3                 | 3.7E-19 | 733        | 77831     |
| <i>clic5b</i>           | 405833    | chloride intracellular channel 5b                | -95.0                  | 1.1E-06 | 80         | 4589      |
| <i>lctlb</i>            | 564250    | lactase-like b                                   | -71.8                  | 5.9E-10 | 140        | 8510      |
| <i>lctla</i>            | 437008    | lactase-like a                                   | -59.6                  | 4.4E-10 | 979        | 49309     |
| <i>zgc:153704</i>       | 767759    | zgc:153704                                       | -48.4                  | 4.1E-06 | 1857       | 7597      |
| <i>ggctb</i>            | 406278    | gamma-glutamylcyclotransferase b                 | -45.2                  | 5.0E-99 | 613        | 23417     |
| <i>lrrc20</i>           | 492485    | leucine rich repeat containing 20                | -41.2                  | 2.2E-82 | 579        | 20104     |
| <i>tgm1l2</i>           | 793096    | transglutaminase 1 like 2                        | -41.1                  | 2.8E-06 | 76         | 2682      |
| <i>mipa</i>             | 445140    | major intrinsic protein of lens fiber a          | -39.7                  | 5.4E-90 | 1277       | 42803     |
| <i>si:ch73-335l21.1</i> | 794738    | si:ch73-335l21.1, transcript variant X3          | -38.9                  | 8.1E-79 | 248        | 8141      |
| <i>zgc:112285</i>       | 561476    | zgc:112285                                       | -31.6                  | 1.6E-72 | 1482       | 39458     |
| <i>crybb1l3</i>         | 566891    | crystallin, beta B1, like 3                      | -30.2                  | 7.7E-73 | 253        | 6454      |
| <i>pah</i>              | 378962    | phenylalanine hydroxylase                        | -29.5                  | 4.6E-21 | 48         | 1192      |
| <i>LOC101884821</i>     | 101884821 | desmoplakin-like                                 | -28.5                  | 1.2E-43 | 40         | 971       |
| <i>ddx19a</i>           | 563448    | zgc:193690                                       | -27.7                  | 1.9E-42 | 36         | 845       |
| <i>lim2.2</i>           | 572341    | lens intrinsic membrane protein 2.2              | -26.0                  | 1.5E-63 | 832        | 18204     |
| <i>fabp11a</i>          | 447944    | fatty acid binding protein 11a                   | -25.4                  | 5.9E-66 | 4642       | 99495     |
| <i>tspan33b</i>         | 567512    | tetraspanin 33b                                  | -24.6                  | 6.9E-63 | 380        | 7885      |
| <i>sprn2</i>            | 100006310 | shadow of prion protein 2                        | -24.0                  | 2.7E-43 | 22         | 450       |
| <i>cryba1a</i>          | 436683    | crystallin, beta A1a                             | -23.6                  | 1.4E-60 | 14878      | 29600     |
| <i>ppt2a.3</i>          | 406830    | zgc:55413                                        | -23.1                  | 1.5E-32 | 22         | 413       |
| <i>jac8</i>             | 796228    | jacalin 8                                        | -22.5                  | 8.5E-59 | 1968       | 74735     |
| <i>fosb</i>             | 492346    | FBJ murine osteosarcoma viral oncogene homolog B | -22.4                  | 5.1E-65 | 173        | 3296      |
| <i>si:ch211-14c7.2</i>  | 571950    | si:ch211-14c7.2, transcript variant X11          | -19.7                  | 2.1E-63 | 656        | 10910     |

| Gene symbol            | Gene ID   | Identification                                                       | Fold-change (Tg vs WT) | p-value | Read count |           |
|------------------------|-----------|----------------------------------------------------------------------|------------------------|---------|------------|-----------|
|                        |           |                                                                      |                        |         | Tg/+       | WT (mean) |
| <i>lim2.1</i>          | 573354    | lens intrinsic membrane protein 2.1                                  | -19.4                  | 3.8E-61 | 556        | 9102      |
| <i>jd2p2b</i>          | 436766    | Jun dimerization protein 2b                                          | -19.2                  | 4.1E-50 | 54         | 878       |
| <i>zgc:153031</i>      | 557552    | zgc:153031                                                           | -19.1                  | 7.9E-49 | 193        | 3119      |
| <i>lim2.3</i>          | 436860    | lens intrinsic membrane protein 2.3                                  | -17.9                  | 5.8E-51 | 556        | 8426      |
| <i>mct2p2b</i>         | 562526    | multiple C2 domains, transmembrane 2b, transcript variant X2         | -17.3                  | 3.6E-45 | 68         | 997       |
| <i>crybb1</i>          | 114418    | crystallin, beta B1                                                  | -17.1                  | 6.4E-50 | 8077       | 116166    |
| <i>serpinb1</i>        | 436926    | serpin peptidase inhibitor, clade B (ovalbumin), member 1            | -17.0                  | 2.6E-50 | 5259       | 75518     |
| <i>crybb1/1</i>        | 553473    | crystallin, beta B1, like 1                                          | -16.9                  | 2.9E-53 | 423        | 6018      |
| <i>si:ch211-69b7.6</i> | 556640    | si:ch211-69b7.6                                                      | -16.3                  | 3.9E-46 | 837        | 11595     |
| <i>lim2.5</i>          | 541395    | lens intrinsic membrane protein 2.5                                  | -16.2                  | 6.1E-51 | 945        | 12901     |
| <i>dsc2l</i>           | 560091    | desmocollin 2 like                                                   | -16.0                  | 1.6E-29 | 1236       | 16878     |
| <i>myocd</i>           | 100331725 | myocardin, transcript variant X4                                     | -15.9                  | 3.2E-39 | 43         | 579       |
| <i>fam234a</i>         | 796439    | family with sequence similarity 234, member A, transcript variant X1 | -14.9                  | 1.1E-52 | 440        | 5572      |
| <i>LOC101883471</i>    | 101883471 | specifically androgen-regulated gene protein-like                    | -14.8                  | 1.2E-24 | 53         | 672       |
| <i>havcr2</i>          | 100536120 | hepatitis A virus cellular receptor 2, transcript variant X2         | -14.6                  | 7.2E-29 | 75         | 789       |
| <i>tuft1b</i>          | 100005886 | tuftelin 1b                                                          | -14.3                  | 2.4E-26 | 34         | 416       |
| <i>fbxl16</i>          | 797939    | F-box and leucine-rich repeat protein 16                             | -13.4                  | 2.3E-35 | 71         | 805       |
| <i>cmtm4</i>           | 436765    | CKLF-like MARVEL transmembrane domain containing 4                   | -13.3                  | 1.6E-24 | 21         | 238       |
| <i>pcdh20</i>          | 100007362 | protocadherin 20                                                     | -13.2                  | 1.7E-22 | 36         | 408       |
| <i>jcada</i>           | 100001168 | junctional cadherin 5 associated a, transcript variant X1            | -13.1                  | 1.4E-54 | 758        | 8504      |
| <i>capn12</i>          | 799247    | calpain 12                                                           | -12.4                  | 6.9E-38 | 363        | 3834      |

**Supplementary Table S32.** Top-50 upregulated genes in altered eyes of old (two years) male *myoc* transgenic zebrafish identified in the transcriptomic study. DEGs that coincided in the two comparisons of the ocular transgenic transcriptome (Tg) with each of the two wild type (WT) ocular transcriptomes were selected. Differential expression threshold: foldchange <-2; read count>20. p-value<0.05.

| Gene symbol              | Gene ID   | Identification                                               | Fold-change (Tg vs. WT) | p-value | Read count |           |
|--------------------------|-----------|--------------------------------------------------------------|-------------------------|---------|------------|-----------|
|                          |           |                                                              |                         |         | Tg/+       | WT (mean) |
| <i>Ccdc24</i>            | 541495    | coiled-coil domain containing 24                             | 54.1                    | 4.9E-08 | 2586       | 315       |
| <i>col7a1l</i>           | 559516    | collagen type VII alpha 1-like                               | 28.6                    | 4.7E-07 | 1562       | 72        |
| <i>angptl3</i>           | 010817    | angiopoietin-like 3                                          | 28.5                    | 2.4E-11 | 1624       | 77        |
| <i>tnni2a.4</i>          | 494164    | troponin I type 2a (skeletal, fast), tandem duplicate 4      | 26.5                    | 3.9E-05 | 3066       | 726       |
| <i>Pvalb2</i>            | 58028     | parvalbumin 2                                                | 24.6                    | 5.9E-09 | 7218       | 1283      |
| <i>fj08f03</i>           | 030131    | si:ch211-153b23.4                                            | 23.9                    | 2.4E-16 | 16278      | 6619      |
| <i>pvalb1</i>            | 402805    | parvalbumin 1                                                | 21.3                    | 3.0E-10 | 7218       | 1238      |
| <i>ptk2ba</i>            | 768185    | protein tyrosine kinase 2 beta, a, transcript variant X2     | 17.6                    | 6.1E-06 | 500        | 25        |
| <i>snx19a</i>            | 550357    | sorting nexin 19a                                            | 17.2                    | 9.9E-05 | 4333       | 213       |
| <i>zgc:112332</i>        | 678602    | zgc:112332                                                   | 16.6                    | 7.8E-11 | 6499       | 337       |
| <i>tpma</i>              | 445049    | alpha-tropomyosin                                            | 16.5                    | 1.7E-06 | 9638       | 1766      |
| <i>irg1l</i>             | 100004274 | immunoresponsive gene 1, like                                | 15.3                    | 1.1E-09 | 2381       | 133       |
| <i>rnh1</i>              | 569436    | ribonuclease/angiogenin inhibitor 1                          | 13.6                    | 3.3E-09 | 772        | 51        |
| <i>zgc:172122</i>        | 571844    | zgc:172122                                                   | 13.1                    | 2.1E-12 | 426        | 29        |
| <i>mylpfb</i>            | 447930    | myosin light chain, phosphorylatable, fast skeletal muscle b | 12.9                    | 1.7E-05 | 3485       | 725       |
| <i>cyp39a1</i>           | 564475    | cytochrome P450, family 39, subfamily A, polypeptide 1       | 12.7                    | 3.9E-05 | 481        | 32        |
| <i>Cb252</i>             | 565454    | si:ch211-153b23.5                                            | 12.5                    | 6.2E-21 | 1450       | 107       |
| <i>chchd3b</i>           | 325751    | coiled-coil-helix-coiled-coil-helix domain containing 3b     | 11.5                    | 8.2E-04 | 563        | 47        |
| <i>myhz1.2</i>           | 799300    | myosin, heavy polypeptide 1.2, skeletal muscle               | 10.8                    | 5.9E-07 | 8501       | 1772      |
| <i>crygm2d17</i>         | 561929    | crystallin, gamma M2d17                                      | 10.6                    | 2.3E-04 | 699        | 180       |
| <i>crygm2d20</i>         | 100000175 | crystallin, gamma M2d20                                      | 10.2                    | 2.4E-05 | 489        | 116       |
| <i>crygm2d16</i>         | 798701    | crystallin, gamma M2d16                                      | 10.1                    | 4.9E-15 | 574        | 143       |
| <i>gtf3c3</i>            | 553318    | general transcription factor IIC, polypeptide 3              | 9.7                     | 3.0E-17 | 4978       | 436       |
| <i>si:ch211-202m22.1</i> | 100536303 | si:ch211-202m22.1                                            | 8.9                     | 1.4E-05 | 363        | 35        |
| <i>spice1</i>            | 494093    | spindle and centriole associated protein 1                   | 8.6                     | 2.8E-03 | 526        | 55        |
| <i>nos2b</i>             | 563654    | nitric oxide synthase 2b, inducible                          | 8.5                     | 4.3E-06 | 689        | 78        |

| Gene symbol              | Gene ID   | Identification                                                          | Fold-change (Tg vs. WT) | p-value | Read count |           |
|--------------------------|-----------|-------------------------------------------------------------------------|-------------------------|---------|------------|-----------|
|                          |           |                                                                         |                         |         | Tg/+       | WT (mean) |
| <i>col28a1a</i>          | 555428    | collagen, type XXVIII, alpha 1a                                         | 8.2                     | 1.2E-16 | 2128       | 226       |
| <i>tncn2</i>             | 58082     | troponin C type 2 (fast)                                                | 8.1                     | 5.7E-25 | 2569       | 565       |
| <i>smyhc1</i>            | 321552    | slow myosin heavy chain 1                                               | 7.9                     | 3.4E-16 | 894        | 123       |
| <i>tmem56b</i>           | 449652    | transmembrane protein 56b                                               | 7.9                     | 4.4E-11 | 3951       | 432       |
| <i>myl10</i>             | 550569    | myosin, light chain 10, regulatory                                      | 7.8                     | 2.8E-13 | 864        | 178       |
| <i>myhz1.3</i>           | 100008070 | ns:zf-e68                                                               | 7.6                     | 1.4E-08 | 8501       | 1090      |
| <i>synpo</i>             | 100536545 | synaptopodin, transcript variant X2                                     | 7.3                     | 5.1E-50 | 386        | 58        |
| <i>si:ch211-103a14.5</i> | 100330921 | si:ch211-103a14.5                                                       | 7.2                     | 7.6E-06 | 626        | 97        |
| <i>dcac2b</i>            | 563259    | doublecortin domain containing 2B                                       | 7.0                     | 7.2E-10 | 1376       | 166       |
| <i>qpct</i>              | 795685    | glutaminyl-peptide cyclotransferase                                     | 6.9                     | 2.9E-04 | 270        | 35        |
| <i>myl1</i>              | 336165    | myosin, light chain 1, alkali; skeletal, fast                           | 6.8                     | 4.7E-08 | 1630       | 378       |
| <i>card9</i>             | 796425    | caspase recruitment domain family, member 9                             | 6.8                     | 1.5E-16 | 394        | 49        |
| <i>ccdc180</i>           | 100538012 | coiled-coil domain containing 180, transcript variant X3                | 6.6                     | 9.9E-06 | 242        | 36        |
| <i>gnb1l</i>             | 541381    | guanine nucleotide binding protein (G protein), beta polypeptide 1-like | 6.5                     | 3.5E-07 | 251        | 33        |
| <i>spag9a</i>            | 558833    | sperm associated antigen 9a                                             | 6.5                     | 5.2E-11 | 387        | 54        |
| <i>si:ch211-163l21.8</i> | 449761    | si:ch211-163l21.8                                                       | 6.4                     | 6.1E-06 | 315        | 55        |
| <i>actc1b</i>            | 58114     | actin, alpha, cardiac muscle 1b                                         | 6.4                     | 6.3E-08 | 25146      | 5664      |
| <i>si:ch211-256m1.8</i>  | 795494    | si:ch211-256m1.8                                                        | 6.3                     | 1.6E-07 | 832        | 112       |
| <i>cfap70</i>            | 564542    | si:dkey-254e1.1                                                         | 6.3                     | 8.3E-08 | 720        | 103       |
| <i>ccdc15</i>            | 100333818 | coiled-coil domain containing 15                                        | 6.2                     | 2.3E-05 | 319        | 56        |
| <i>crygm2d3</i>          | 790908    | crystallin, gamma M2d3                                                  | 6.1                     | 8.2E-05 | 589        | 154       |
| <i>ptprbl</i>            | 100333658 | protein tyrosine phosphatase, receptor type, B, like                    | 6.1                     | 4.8E-09 | 427        | 91        |
| <i>cyp11c1</i>           | 791124    | cytochrome P450, family 11, subfamily C, polypeptide 1                  | 6.1                     | 4.5E-05 | 235        | 34        |

**Supplementary Table S4.** Confirmation by qPCR of selected DEGs identified in the transcriptome analysis.

| Gene            | Gene ID<br>(GeneBank) | Transcriptome |         | qPCR                                      |         |
|-----------------|-----------------------|---------------|---------|-------------------------------------------|---------|
|                 |                       | Fold-change   | p-value | Fold-change<br>( $2^{-\Delta\Delta CT}$ ) | p-value |
| <i>Angptl3</i>  | 010817                | 28.5          | 2,4E-11 | 15.0                                      | 0.002   |
| <i>Arhgef40</i> | 100151026             | -3.4          | 2,2E-08 | -1.8                                      | 0.009   |
| <i>Bfsp2</i>    | 494090                | -206.4        | 6,1E-56 | -9.1                                      | 0.001   |
| <i>Cav2</i>     | 415240                | -3.5          | 1,9E-12 | -23.4                                     | 0.002   |
| <i>Ccdc24</i>   | 541495                | 54.1          | 4,9E-08 | 56.8                                      | 0.005   |
| <i>crybgx</i>   | 553474                | -217.3        | 1,5E-50 | -76.9                                     | 0.004   |
| <i>lgsn</i>     | 567024                | -156.5        | 3,9E-16 | 4.4                                       | 0.001   |
| <i>Vangl2</i>   | 245949                | -4.8          | 3,3E-08 | -1.6                                      | 0.001   |

**Supplementary Table S5.** Gene ontology (GO) enrichment analysis of the top-50 up and downregulated genes in the transcriptomic study. p-value <0.05. The analysis was carried out using the Epistemic artificial intelligence web-based software platform. B: BioPlanet 2019; EPC: Elsevier Pathway Collection; FDR: false discovery rate. KEGG; Kyoto encyclopedia of genes and genomes; Overlap count: number of uploaded genes that belong to the different functional groups. Gene set count: total number of genes in the functional group.

| Functional group                              | Database | Overlap count | Gene set count | FDR adjust. p-value | Mapped gene symbols                                                                      | Uploaded genes                                                                                                                                                             |
|-----------------------------------------------|----------|---------------|----------------|---------------------|------------------------------------------------------------------------------------------|----------------------------------------------------------------------------------------------------------------------------------------------------------------------------|
| Proteins Involved in Cataract                 | EPC      | 12            | 94             | 3,9E+04             | <i>BFSP2, CRYBA1, CRYBB1, CRYBB2, CRYBB3, CRYGB, CRYGC, CRYGD, FOSB, IRS1, LIM2, MIP</i> | <i>bfs2, cryba1a, crybb1, crybb1l1, crybb1l3, crygm2c, crygm2d16, crygm2d17, crygm2d20, crygm2d3, crygm5, crygm7, fosb, lim2.1, lim2.3, lim2.5, mipa, si:ch73-335l21.1</i> |
| Cataract Congenital                           | EPC      | 8             | 19             | 3,9E+04             | <i>BFSP2, CRYBB1, CRYBB2, CRYGB, CRYGC, CRYGD, LIM2, MIP</i>                             | <i>bfs2, crybb1, crybb1l1, crybb1l3, crygm2c, crygm2d16, crygm2d17, crygm2d20, crygm2d3, crygm5, crygm7, lim2.1, lim2.3, lim2.5, mipa</i>                                  |
| Genes With Mutations Associated with Cataract | EPC      | 8             | 21             | 3,9E+04             | <i>BFSP2, CRYBB1, CRYBB2, CRYBB3, CRYGC, CRYGD, LIM2, MIP</i>                            | <i>bfs2, crybb1, crybb1l1, crybb1l3, crygm2c, crygm2d16, crygm2d17, crygm2d20, crygm2d3, crygm5, crygm7, lim2.1, lim2.3, lim2.5, mipa</i>                                  |
| Striated Muscle Contraction                   | B        | 6             | 38             | 2,8E+08             | <i>ACTC1, MYL1, TNNC2, TNNI2, TPM1, TPM3</i>                                             | <i>actc1b, myl1, tnnc2, tnni2a.4, tpma</i>                                                                                                                                 |
| Muscle Contraction                            | B        | 5             | 49             | 2,6E+11             | <i>MYL1, TNNC2, TNNI2, TPM1, TPM3</i>                                                    | <i>myl1, tnnc2, tnni2a.4, tpma</i>                                                                                                                                         |
| Steroids Induced Cataract                     | EPC      | 5             | 59             | 2,4E-04             | <i>BFSP2, CRYBB2, CRYGD, IRS1, MIP</i>                                                   | <i>bfs2, crybb1l3, crygm2c, crygm2d16, crygm2d17, crygm2d20, crygm2d3, crygm5, crygm7, mipa, si:ch73-335l21.1</i>                                                          |
| Hypertrophic Cardiomyopathy                   | EPC      | 5             | 88             | 1,4E-03             | <i>ACTC1, IRS1, MYH7, PTK2B, TPM1</i>                                                    | <i>actc1b, ptk2ba, si:ch73-335l21.1, smyhc1, tpma</i>                                                                                                                      |
| Integrins in Angiogenesis                     | B        | 4             | 74             | 2,6E-03             | <i>ANGPTL3, COL7A1, IRS1, PTK2B</i>                                                      | <i>angptl3, col7a1l, ptk2ba, si:ch73-335l21.1</i>                                                                                                                          |
| Cardiac Muscle Contraction                    | B        | 4             | 83             | 3,0E-03             | <i>ACTC1, MYH7, TPM1, TPM3</i>                                                           | <i>actc1b, smyhc1, tpma</i>                                                                                                                                                |
| Dilated Cardiomyopathy                        | B        | 4             | 100            | 4,9E-03             | <i>ACTC1, MYH7, TPM1, TPM3</i>                                                           | <i>actc1b, smyhc1, tpma</i>                                                                                                                                                |
| Tight Junction                                | B        | 4             | 133            | 1,0E-02             | <i>MYH4, MYH7, MYL10, MYLPF</i>                                                          | <i>myhz1.2, myhz1.3, myl10, mylpfb, smyhc1</i>                                                                                                                             |



| Functional group                                     | Database | Overlap count | Gene set count | FDR adjust. p-value | Mapped gene symbols             | Uploaded genes                                                                  |
|------------------------------------------------------|----------|---------------|----------------|---------------------|---------------------------------|---------------------------------------------------------------------------------|
| Diabetes Induced Cataract                            | EPC      | 4             | 18             | 4,5E+11             | <i>CRYGB, CRYGC, CRYGD, MIP</i> | <i>crygm2c, crygm2d16, crygm2d17, crygm2d20, crygm2d3, crygm5, crygm7, mipa</i> |
| Age-Related Cataract                                 | EPC      | 4             | 23             | 1,0E-04             | <i>CRYGB, CRYGC, CRYGD, MIP</i> | <i>crygm2c, crygm2d16, crygm2d17, crygm2d20, crygm2d3, crygm5, crygm7, mipa</i> |
| Proteins Involved in Hypertrophic Cardiomyopathy     | EPC      | 4             | 65             | 2,8E-03             | <i>ACTC1, FOSB, MYH7, TPM1</i>  | <i>actc1b, fosb, smyhc1, tpma</i>                                               |
| Dilated Cardiomyopathy                               | EPC      | 4             | 69             | 3,1E-03             | <i>ACTC1, IRS1, MYH7, TPM1</i>  | <i>actc1b, si:ch73-335l21.1, smyhc1, tpma</i>                                   |
| Proteins Involved in Dilated Cardiomyopathy          | EPC      | 4             | 166            | 3,6E-02             | <i>ACTC1, MYH7, MYOCD, TPM1</i> | <i>actc1b, myocd, smyhc1, tpma</i>                                              |
| Cardiac Muscle Contraction                           | KEGG     | 4             | 78             | 1,4E-03             | <i>ACTC1, MYH7, TPM1, TPM3</i>  | <i>actc1b, smyhc1, tpma</i>                                                     |
| Hypertrophic Cardiomyopathy (HCM)                    | KEGG     | 4             | 83             | 1,4E-03             | <i>ACTC1, MYH7, TPM1, TPM3</i>  | <i>actc1b, smyhc1, tpma</i>                                                     |
| Dilated Cardiomyopathy                               | KEGG     | 4             | 89             | 1,4E-03             | <i>ACTC1, MYH7, TPM1, TPM3</i>  | <i>actc1b, smyhc1, tpma</i>                                                     |
| Adrenergic Signaling in Cardiomyocytes               | KEGG     | 4             | 144            | 5,1E-03             | <i>ACTC1, MYH7, TPM1, TPM3</i>  | <i>actc1b, smyhc1, tpma</i>                                                     |
| Leukocyte Transendothelial Migration                 | B        | 3             | 117            | 3,5E-02             | <i>MYL10, MYLPF, PTK2B</i>      | <i>myl10, mylpfb, ptk2ba</i>                                                    |
| Oxygen Shortage in Myocardial Ischemia               | EPC      | 3             | 20             | 1,4E-03             | <i>ACTC1, MYH7, TPM1</i>        | <i>actc1b, smyhc1, tpma</i>                                                     |
| Sarcomere in Cardiomyocyte in Dilated Cardiomyopathy | EPC      | 3             | 25             | 2,4E-03             | <i>ACTC1, MYH7, TPM1</i>        | <i>actc1b, smyhc1, tpma</i>                                                     |
| Ca2+ Toxicity in Lens Cells                          | EPC      | 3             | 27             | 2,7E-03             | <i>CRYGB, CRYGC, CRYGD</i>      | <i>crygm2c crygm2d16, crygm2d17, crygm2d20, crygm2d3, crygm5, crygm7</i>        |

| Functional group                                             | Database | Overlap count | Gene set count | FDR adjust. p-value | Mapped gene symbols        | Uploaded genes                          |
|--------------------------------------------------------------|----------|---------------|----------------|---------------------|----------------------------|-----------------------------------------|
| Sarcomere Disorganization and Intracellular Calcium Overload | EPC      | 3             | 29             | 2,8E-03             | <i>ACTC1, MYH7, TPM1</i>   | <i>actc1b, smyhc1, tpma</i>             |
| TRPM4/6/7/8 Signaling in Arterial Hypertension (Hypothesis)  | EPC      | 3             | 39             | 5,8E-03             | <i>MYOCD, PTK2B, TPM1</i>  | <i>myocd, ptk2ba, tpma</i>              |
| Cardiomyocyte Dysfunction                                    | EPC      | 3             | 48             | 9,8E-03             | <i>ACTC1, MYH7, TPM1</i>   | <i>actc1b, smyhc1, tpma</i>             |
| Cardiomyocyte Hypertrophy                                    | EPC      | 3             | 65             | 1,8E-02             | <i>IRS1, MYH7, PTK2B</i>   | <i>ptk2ba, si:ch73-335l21.1, smyhc1</i> |
| Leukocyte Transendothelial Migration                         | KEGG     | 3             | 114            | 1,5E-02             | <i>MYL10, MYLPF, PTK2B</i> | <i>myl10, mylpfb, ptk2ba</i>            |
| Cytochrome P450 Metabolism of Endogenous Sterols             | B        | 2             | 15             | 9,6E-03             | <i>CYP11B1, CYP39A1</i>    | <i>cyp11c1, cyp39a1</i>                 |
| Smooth Muscle Contraction                                    | B        | 2             | 22             | 1,4E-02             | <i>TPM1, TPM3</i>          | <i>tpma</i>                             |
| Visual Signal Transduction: Cones                            | B        | 2             | 23             | 1,4E-02             | <i>LOC118142757, RDH12</i> | <i>si:ch211-103a14.5, zgc:112332</i>    |
| Visual Signal Transduction: Rods                             | B        | 2             | 23             | 1,4E-02             | <i>LOC118142757, RDH12</i> | <i>si:ch211-103a14.5, zgc:112332</i>    |
| Steroid Hormone Vitamin A and Vitamin D Metabolism           | B        | 2             | 36             | 3,0E-02             | <i>CYP11B1, RDH11</i>      | <i>cyp11c1, zgc:112332</i>              |

| Functional group                                     | Database | Overlap count | Gene set count | FDR adjust. p-value | Mapped gene symbols   | Uploaded genes                  |
|------------------------------------------------------|----------|---------------|----------------|---------------------|-----------------------|---------------------------------|
| Rod Visual Cycle Impairment in Retinitis Pigmentosa  | EPC      | 2             | 16             | 1,1E-02             | <i>RDH11, RDH12</i>   | <i>zgc:112332, zgc:112332</i>   |
| Visual Cycle in Retinal Rods                         | EPC      | 2             | 16             | 1,1E-02             | <i>RDH11, RDH12</i>   | <i>zgc:112332, zgc:112332</i>   |
| NTRK1/2/3 -> Acetylcholine Production                | EPC      | 2             | 17             | 1,2E-02             | <i>IRS1, PTK2B</i>    | <i>ptk2ba, si:ch73-335l21.1</i> |
| Microglia and Motor Neuron Interaction Dysregulation | EPC      | 2             | 26             | 2,5E-02             | <i>CD200, PTK2B</i>   | <i>ptk2ba, zgc:172122</i>       |
| Aldosterone Synthesis Chronic Regulation             | EPC      | 2             | 31             | 3,1E-02             | <i>CYP11B1, PTK2B</i> | <i>cyp11c1, ptk2ba</i>          |
| Estrogens/Esr1 Non-Genomic Signaling                 | EPC      | 2             | 32             | 3,1E-02             | <i>IRS1, PTK2B</i>    | <i>ptk2ba, si:ch73-335l21.1</i> |
| IGF1R -> MEF/MYOD/MYOG Signaling                     | EPC      | 2             | 32             | 3,1E-02             | <i>IRS1, PTK2B</i>    | <i>ptk2ba, si:ch73-335l21.1</i> |
| Vitamin a (Retinol) Metabolism and Visual Cycle      | EPC      | 2             | 32             | 3,1E-02             | <i>RDH11, RDH12</i>   | <i>zgc:112332, zgc:112332</i>   |
| Folate Biosynthesis                                  | KEGG     | 2             | 15             | 5,1E-03             | <i>DHFR, DHFR2</i>    | <i>zgc:153031, zgc:153031</i>   |
| One Carbon Pool by Folate                            | KEGG     | 2             | 20             | 6,1E-03             | <i>DHFR, DHFR2</i>    | <i>zgc:153031, zgc:153031</i>   |
| Antifolate Resistance                                | KEGG     | 2             | 31             | 1,2E-02             | <i>DHFR, DHFR2</i>    | <i>zgc:153031, zgc:153031</i>   |
| Retinol Metabolism                                   | KEGG     | 2             | 65             | 4,0E-02             | <i>RDH11, RDH12</i>   | <i>zgc:112332, zgc:112332</i>   |

**Supplementary Table S6.** Gene ontology (GO) enrichment analysis of the top-50 up and downregulated genes in the transcriptomic study. p-value <0.05. The analysis was carried out with the web tool ShinyGO (N=differentially expressed genes/number of genes in the GO category).

| N       | High level GO category               | Genes                                                                                                                                                                                                      |
|---------|--------------------------------------|------------------------------------------------------------------------------------------------------------------------------------------------------------------------------------------------------------|
| 12/98   | Lens development in camera-type eye  | <i>crybb1l1, crybgx, crygm7, cryba1a, crygm5, crybb1, crygm2d17, crygm2d16, crygm2d3, crygm2d20, crygm2c, mipa</i>                                                                                         |
| 12/187  | Visual perception                    | <i>crybb1l1, crybgx, crygm7, cryba1a, crygm5, crybb1, crygm2d17, crygm2d16, crygm2d3, crygm2d20, crygm2c, si:ch211-103a14.5</i>                                                                            |
| 12/195  | Sensory perception of light stimulus | <i>crybb1l1, crybgx, crygm7, cryba1a, crygm5, crybb1, crygm2d17, crygm2d16, crygm2d3, crygm2d20, crygm2c, si:ch211-103a14.5</i>                                                                            |
| 13/361  | Eye development                      | <i>crybb1l1, crybgx, crygm7, cryba1a, crygm5, crybb1, crygm2d17, crygm2d16, crygm2d3, crygm2d20 crygm2c, mipa, fabp11a</i>                                                                                 |
| 13/361  | Visual system development            | <i>crybb1l1, crybgx, crygm7, cryba1a, crygm5, crybb1 crygm2d17, crygm2d16, crygm2d3, crygm2d20 crygm2c, mipa, fabp11a</i>                                                                                  |
| 12/309  | Camera-type eye development          | <i>crybb1l1, crybgx, crygm7, cryba1a, crygm5, crybb1 crygm2d17, crygm2d16, crygm2d3, crygm2d20 crygm2c, mipa</i>                                                                                           |
| 13/411  | Sensory perception                   | <i>crybb1l1, crybgx, crygm7, cryba1a, crygm5, crybb1 crygm2d17, crygm2d16, crygm2d3, crygm2d20 crygm2c, clic5b, si:ch211-103a14.5</i>                                                                      |
| 13/437  | Sensory system development           | <i>crybb1l1, crybgx, crygm7, cryba1a, crygm5, crybb1 crygm2d17, crygm2d16, crygm2d3, crygm2d20 crygm2c, mipa, fabp11a</i>                                                                                  |
| 13/484  | Sensory organ development            | <i>crybb1l1, crybgx, crygm7, cryba1a, crygm5, crybb1 crygm2d17, crygm2d16, crygm2d3, crygm2d20 crygm2c, mipa, fabp11a</i>                                                                                  |
| 16/885  | System process                       | <i>crybb1l1, tnnc2, crybgx, crygm7, cryba1a, crygm5, crybb1, crygm2d17, tnnc2, crygm2d16 crygm2d3, crygm2d20, crygm2c, clic5b si:ch211-103a14.5, smyhc1</i>                                                |
| 13/559  | Nervous system process               | <i>crybb1l1, crybgx, crygm7, cryba1a, crygm5, crybb1 crygm2d17, crygm2d16, crygm2d3, crygm2d20 crygm2c, clic5b, si:ch211-103a14.5</i>                                                                      |
| 3/26    | Skeletal muscle contraction          | <i>tnni2a.4, tnnc2, smyhc1</i>                                                                                                                                                                             |
| 3/27    | Multicellular organismal movement    | <i>tnni2a.4, tnnc2, smyhc1</i>                                                                                                                                                                             |
| 3/27    | Musculoskeletal movement             | <i>tnni2a.4, tnnc2, smyhc1</i>                                                                                                                                                                             |
| 15/1872 | Animal organ development             | <i>crybb1l1, crybgx, crygm7, cryba1a, crygm5, crybb1 crygm2d17, crygm2d16, crygm2d3, crygm2d20 crygm2c, ptk2ba, mipa, capn12, fabp11a</i>                                                                  |
| 3/54    | Striated muscle contraction          | <i>tnni2a.4, tnnc2, smyhc1</i>                                                                                                                                                                             |
| 22/4051 | Multicellular organismal process     | <i>crybb1l1, ptk2ba, tnni2a.4, crybgx, crygm7, cryba1a crygm5, crybb1, crygm2d17, tnnc2, crygm2d16 crygm2d3, jcada, crygm2d20, crygm2c, clic5b, lenep si:ch211-103a14.5, mipa, smyhc1, capn12, fabp11a</i> |

## 1.2 Supplementary Figures

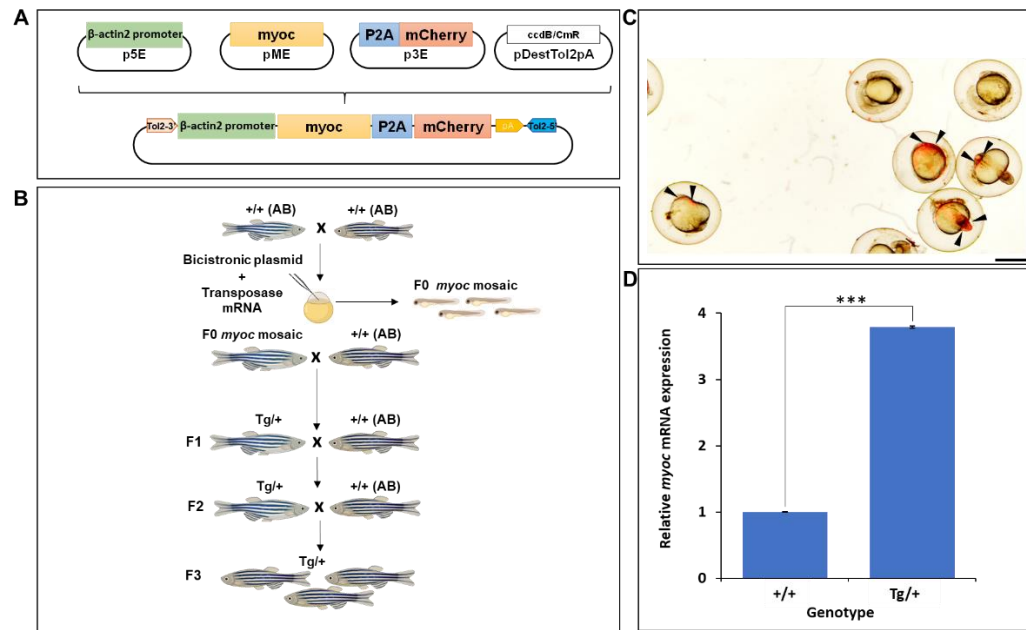

**Supplementary Figure S1.** Generation of a *myoc* transgenic line [*Tg(actb1:myoc-2A-mCherry)*] using the gateway system and transposon-mediated transgenesis. (A) Combination of gateway vectors employed to create the bicistronic transgene cassette, which co-express myocilin and the reporter protein mCherry. pA: poly-A signal; P2A: porcine teschovirus-1 autolytic peptide 2A; p5E: plasmid 5'-entry; pE: plasmid middle-entry; p3E: plasmid 3'-entry; Tol2: recombination Tol2 sites. (B) Stepwise procedure followed to establish the transgenic zebrafish line. The cartoon was created with Biorender. (C) Detection of mCherry fluorescence in F0 microinjected embryos (24 hpf). Red fluorescence and brightfield images are merged. Arrowheads: mCherry fluorescence. (D) Increased *myoc* mRNA level in the transgenic zebrafish line. RNA was purified using pools of 50 fluorescent zebrafish larvae (144 hpf) obtained by crossing F3 transgenic and wild type zebrafish. *Myoc* mRNA level were measured by qRT-PCR. Values represent the average of two independent biological experiments performed in triplicate. \*\*\*:  $p < 0.001$ , Student's t-test. +/+ : wild type; Tg/+ : transgenic.

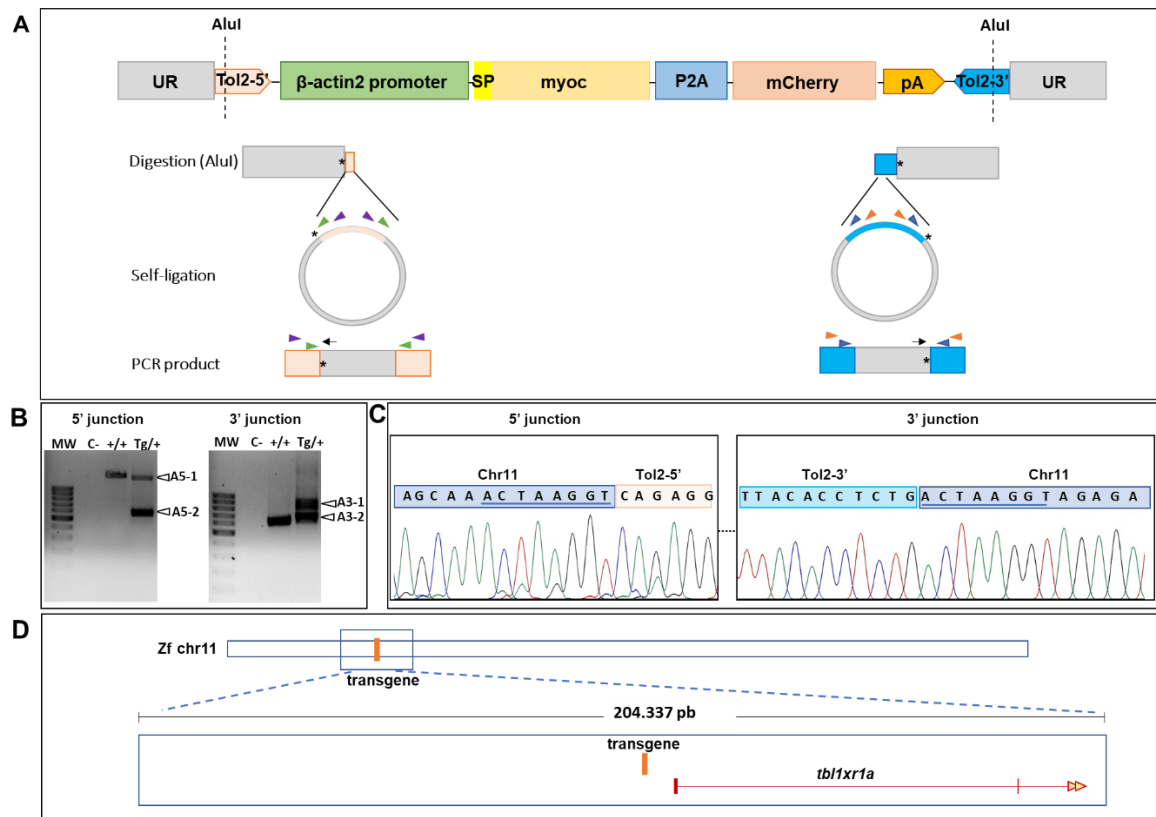

**Supplementary Figure S2.** Identification of the transgenic integration site. (A) Diagram of the nested PCR process. *AluI* restriction target. Tol2 specific primers (arrowheads). Black arrows: sequencing primers from chromosome 11. Purple and orange arrowheads: primers used for the first PCR; green and blue arrowheads: primers used for the second PCR. Asterisk: insertion site. UR: unknown region. SP: signal peptide. P2A: porcine teschovirus-1 autolytic peptide 2A. (B) Agarose gel electrophoresis of the nested PCR amplicons. (C) Representative Sanger sequencing of the amplicons obtained by nested PCR. MW: molecular weight marker; +/+ : wild-type; Tg/+ : transgenic; C- : negative control. (D) Chromosomal localization of the insertion site of the bicistronic transgene. Zf Chr11: zebrafish chromosome 11.

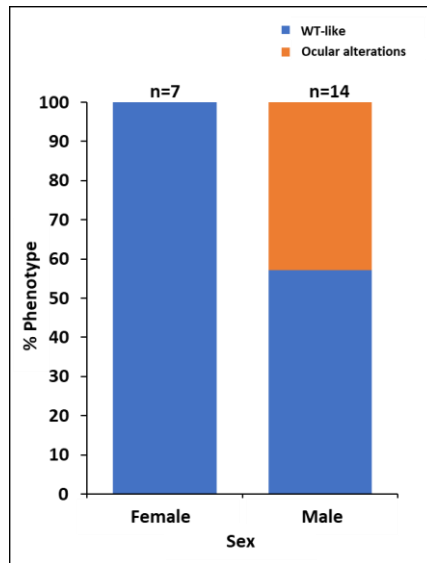

**Supplementary Figure S3.** Ocular phenotype analysis in old (two years old) *myocilin* transgenic zebrafish. Ocular alterations were not observed in females.

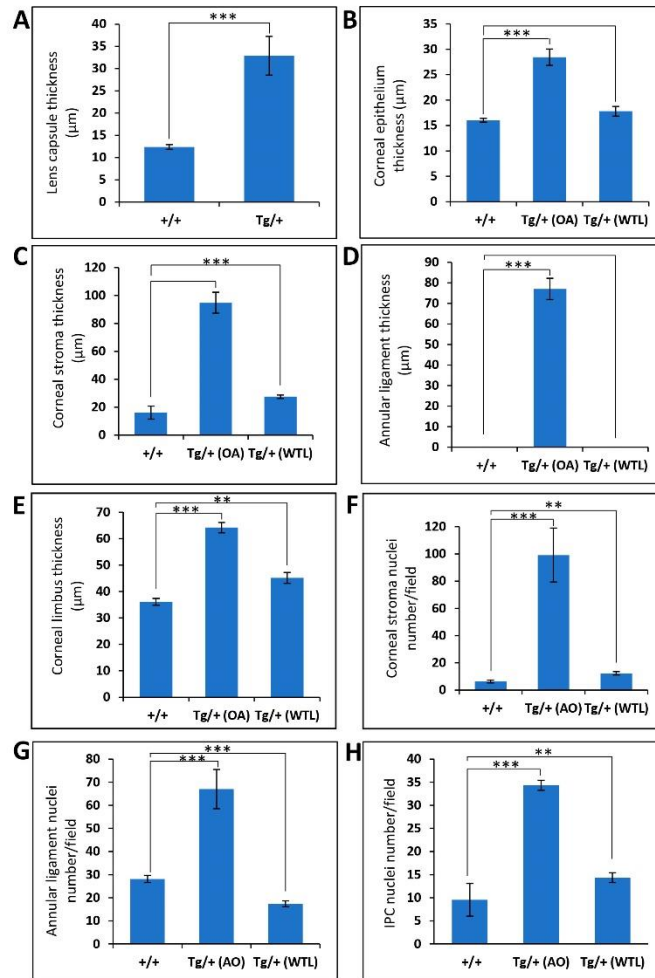

**Supplementary Figure S4.** Quantification of different ocular parameters in old (two years old) myocilin transgenic zebrafish. Thickness of the lens capsule(A), corneal epithelium (B), corneal stroma (C), annular ligament in the central cornea (D), and corneal limbus (E). Nuclei number in the corneal stroma (F), annular ligament (G) and iris pigmented cells (H). Thickness and number of nuclei was counted in four microscopic fields per eye. Hematoxylin-eosin-stained tissue sections were used for thickness measurements. Nuclei were counted in DAPI-stained tissue sections. Tissue sections from four eyes of each phenotype were used for the analyses. \*\*\*:  $p < 0.001$ ; \*\*:  $p < 0.05$ , Student's t-test. +/+ : wildtype; OA: ocular alterations; Tg/+ : transgenic; WTL: wild type-like.



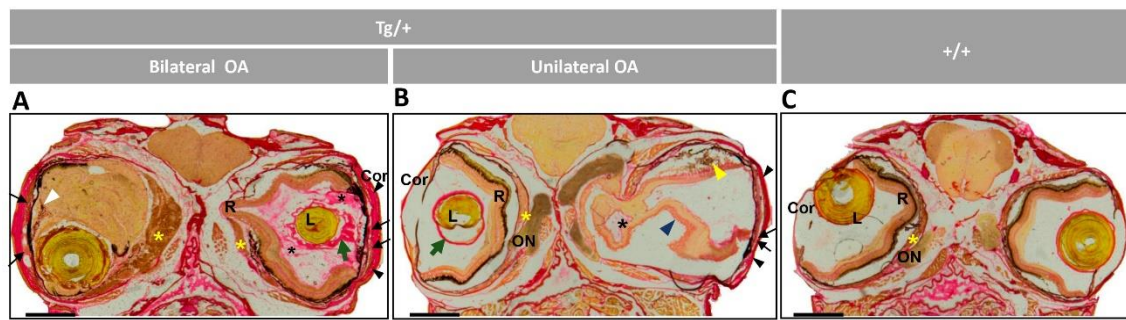

**Supplementary Figure S5.** Histology of head sections of adult male transgenic zebrafish (two years old). Sirius red tissue sections correspond to transgenic zebrafish with bilateral or unilateral macroscopic ocular alterations (A and B, respectively). Control tissue sections from same-age wild type zebrafish (C). Tissue sections are consecutive with those shown in **Figure 2**. Scale bar represents 800  $\mu$ m. Black arrows: Tight contact between the cornea and iris; black arrowheads: thickening of the corneal stroma; green arrow: thickening of lens capsule; blue arrowhead: overgrowth and folding of the retina; yellow arrowhead: degeneration of photoreceptors; black asterisks: accumulation of vitreous material; yellow asterisks: overgrowth of the choroid body; Cor: cornea; OA: ocular alterations; ON: optic nerve; L: lens; R: retina; +/+ : wild type; Tg/+ : transgenic.

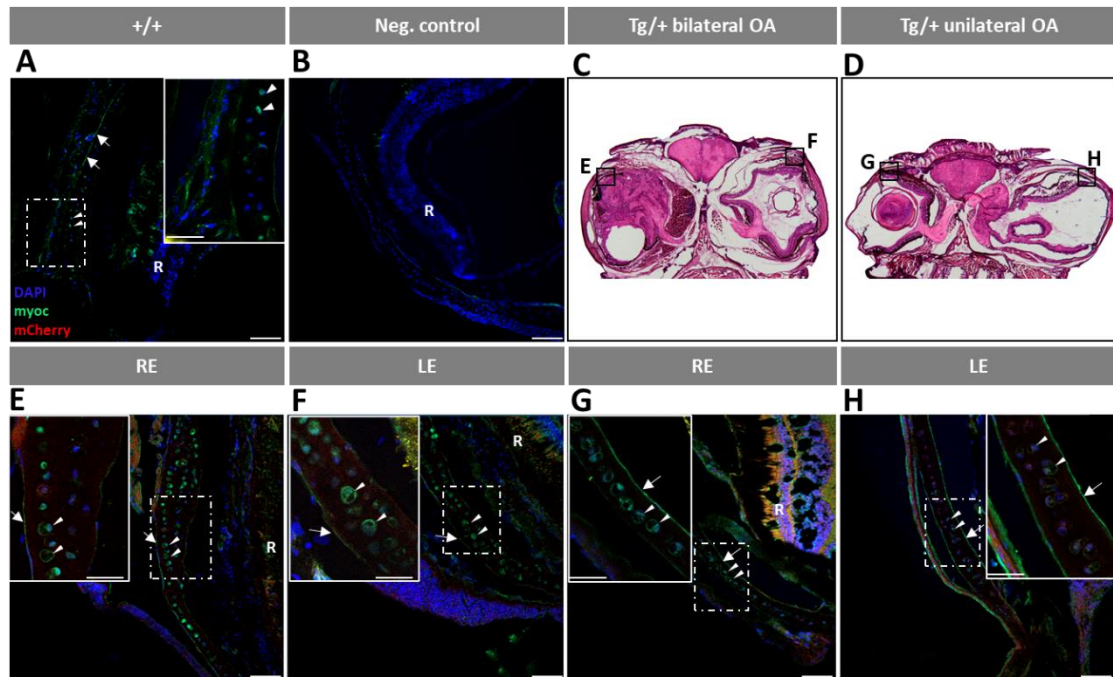

**Supplementary Figure S6.** Expression of myocilin and mCherry in the scleral cartilage of old (two years) myoc transgenic zebrafish. Tissue sections were incubated with a chicken anti-myocilin (TNT) (A, E-H) (green signal) or with only the secondary antibody as a negative control (B). Tissue sections shown in panels (C and D) indicate the regions analysed by immunohistochemistry. Scale bars: 50  $\mu$ m. White arrows: Perichondrium immunoreactivity; white arrowheads: chondrocytes immunoreactivity; R: retina. Tg/+ : transgenic; +/+ : wild type. The images are representative of the results observed in two fishes.

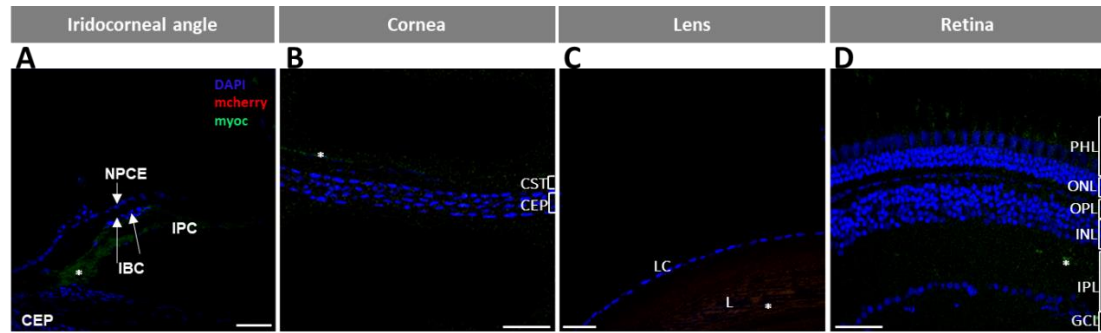

**Supplementary Figure S7.** Negative controls of the immunohistochemical myoc analysis in the old (two years) *myoc* transgenic zebrafish shown in **Figures 5 and 6**. Controls consisted of wild-type tissue sections incubated with a chicken preimmune anti-myocilin antibody (TNT), followed by the secondary antibody. Scale bars: 50  $\mu$ m. Asterisks: autofluorescence. NPCE: Non-pigmented ciliary epithelium; IBC: Iris blood cells; IPC: iris pigment cells; CEP: Corneal epithelium; CST: corneal stroma; L: lens; LC: lens capsule; GCL: ganglion cell layer; IPL: inner plexiform layer; INL; inner nuclear layer; OPL: outer plexiform layer; ONL; outer nuclear layer; PHL: photoreceptor layer.

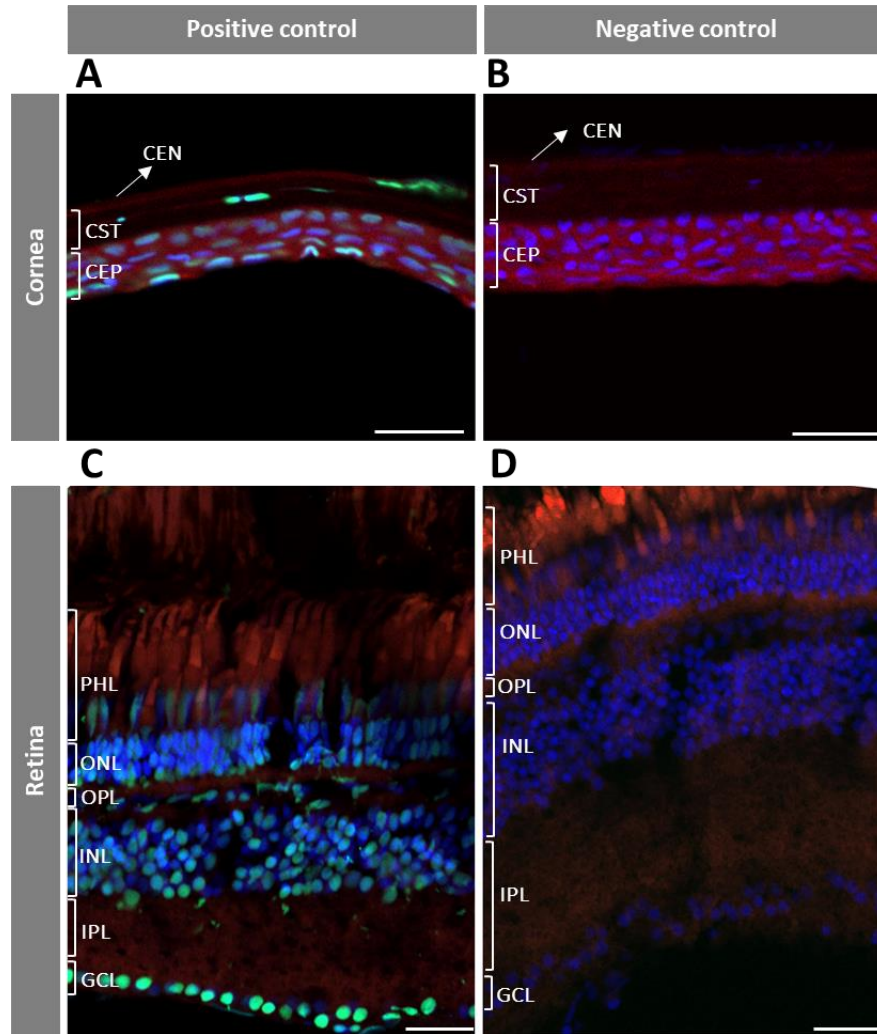

**Supplementary Figure S8.** Positive and negative controls of the TUNEL assay in the 2-year adult zebrafish shown in **Figure 7**. Retinal sections of adult wild-type zebrafish incubated with DNase I (A and C) or with only the labelling solution (B and D) were used as a positive and negative controls, respectively. Note the presence of positive cells in different cornea and retina layers. Scale bars: 50  $\mu\text{m}$  in panels A and B and 25  $\mu\text{m}$  in panels C and D. CEP: corneal epithelium; CST: corneal stroma; CEN: corneal endothelium; GCL: ganglion cell layer; IPL: inner plexiform layer; INL: inner nuclear layer; OPL: outer plexiform layer; ONL; outer nuclear layer; PHL: photoreceptor layer.

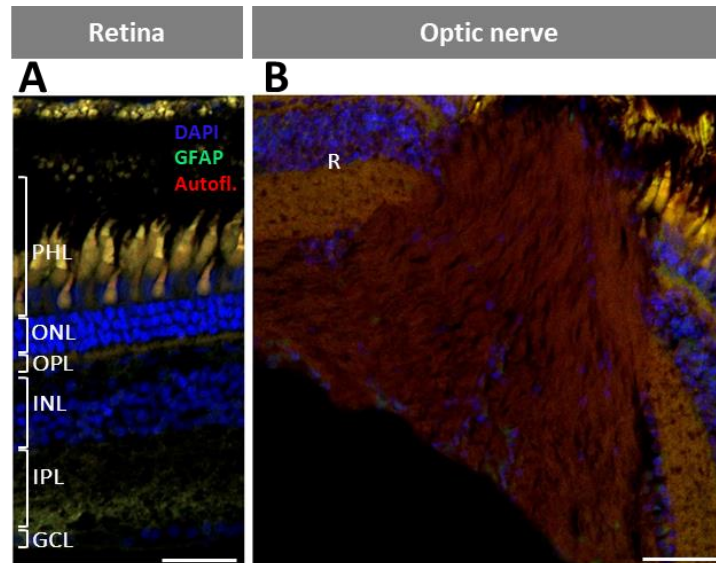

**Supplementary Figure S9.** Negative controls of the Immunohistochemical GFAP analysis in the 2-year adult zebrafish shown in **Figure 8**. Controls consisted of tissue sections of wild type incubated only with the secondary antibody. Scale bars: 25  $\mu\text{m}$ . Autofl.: tissue autofluorescence was detected for image contrast and anatomical reference. GCL: ganglion cell layer; IPL: inner plexiform layer; INL: inner nuclear layer; OPL: outer plexiform layer; ONL; outer nuclear layer; PHL: photoreceptor layer; R: retina.

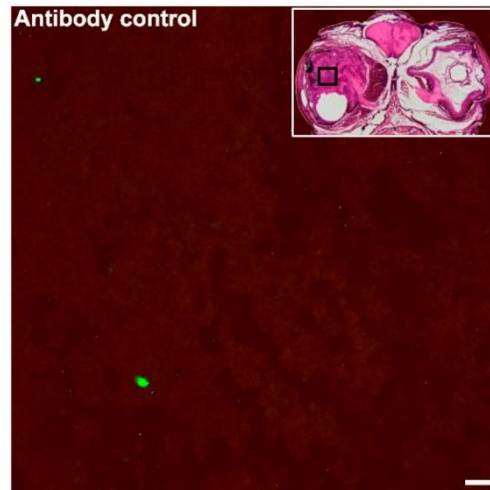

**Supplementary Figure S10.** Negative control of the immunohistochemical calretinin and Brn3a immunostaining in the 2-year adult zebrafish shown in **Figure 9**. The rectangle in the inset shows the approximate location of the region analyzed for the secondary antibody control in a representative tissue section. Controls consisted of ocular tissue sections only incubated with the secondary antibody mix (anti-rabbit Alexa-555 and anti-goat Alexa-633, Molecular Probes). Scale bar: 20  $\mu\text{m}$ .

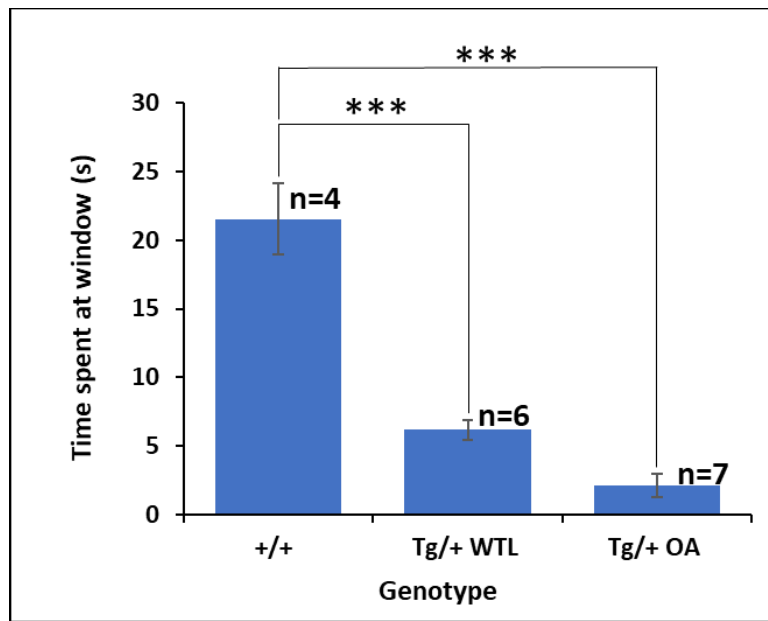

**Supplementary Figure S11.** Evaluation of visual function of old (two years) male transgenic zebrafish by a social preference assay. The time spent by the tested zebrafish at the window proximal to the social stimulus was measured in three intervals of one min and the mean value was calculated. Tg/+ WT-L: transgenic zebrafish with wild type like ocular phenotype. Tg/+ OA: transgenic zebrafish either with unilateral or bilateral ocular alterations; +/+: wild type. \*\*\*:  $p < 0.001$ , Student's t-test.

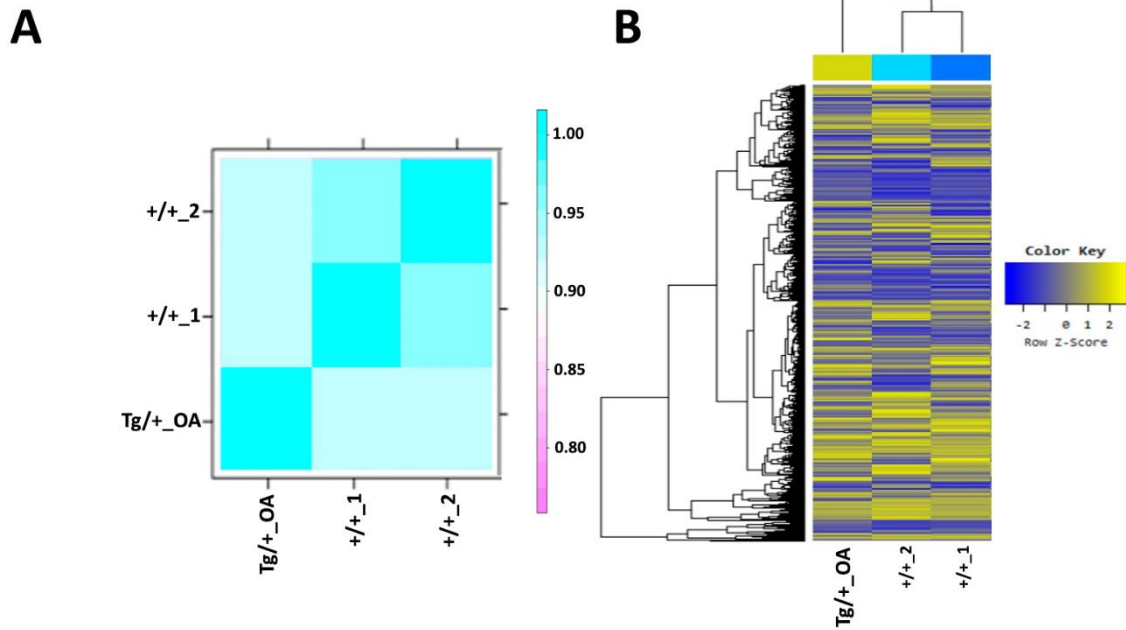

**Supplementary Figure S12.** (A) Correlation matrix showing the similarity between RNAseq replicas ( $Tg/+$  OA eyes vs.  $+/+$  eyes). The similarity between samples is obtained through Pearson's coefficient of sample's normalized value ( $-1 \leq r \leq 1$ ). The closer the value is to 1, the more similar the samples are. (B) Heatmap of hierarchical clustering analysis of significant DEGs and replicas ( $Tg/+$  OA eyes vs.  $+/+$  eyes). Clustering analysis was done using Euclidean distance and complete linkage as a measure of similarity. The results show 3000 DEGs which satisfied a fold change  $> 2$  or  $< -2$  and a raw p value  $< 0.05$ . OA: ocular alterations;  $Tg/+$ : transgenic;  $+/+$ : wild-type.



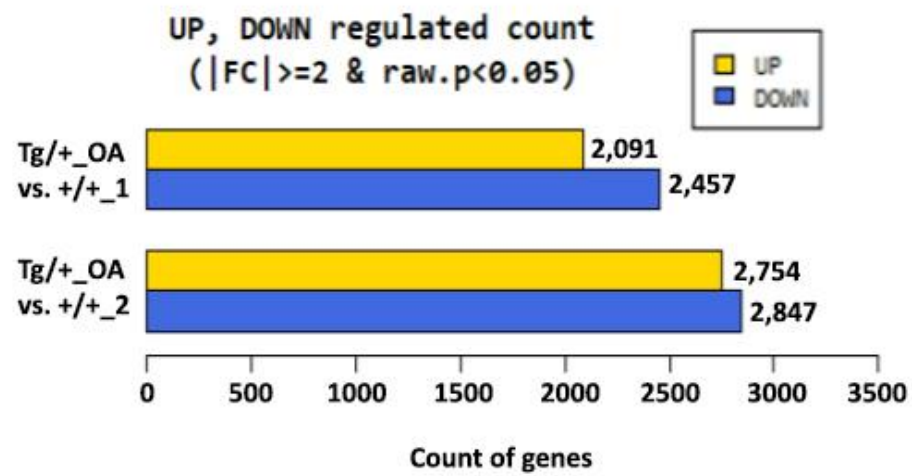

**Supplementary Figure S13.** Number of significant up and down regulated genes based on fold change of comparison pairs (*Tg/+ OA* vs. *+/+*). The results show DEGs which satisfied a fold change > 2 or < -2 and a raw p value < 0.05. OA: ocular alterations; *Tg/+*: transgenic; *+/+*: wild-type.

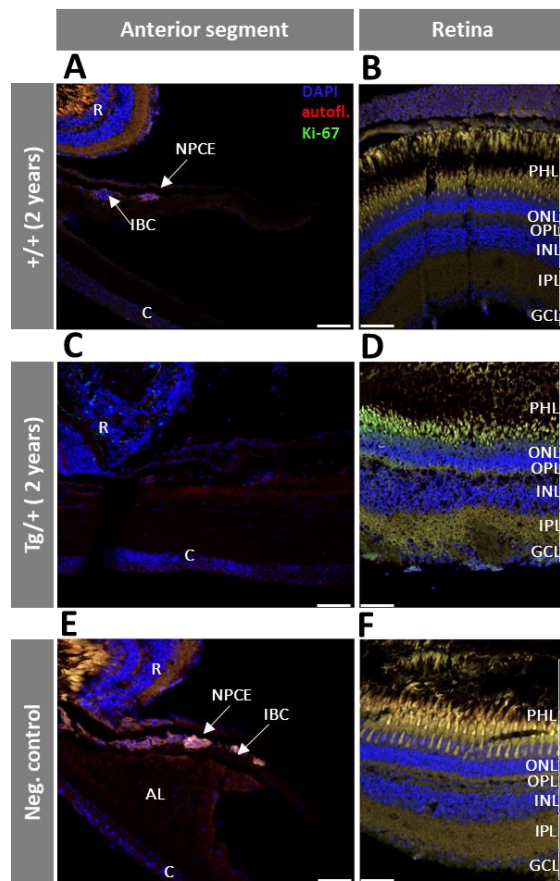

**Supplementary Figure S14.** Immunohistochemistry of the cell proliferation marker Ki-67 in the anterior segment and retina of old (two years) male transgenic and wild type (control) zebrafish. Histological sections were incubated with either an anti-Ki-67 primary antibody (A-D) and Cy2 donkey anti-rabbit secondary antibody or with only the secondary antibody as a negative control (E-F). Scale bars represent 50  $\mu$ m. Autofl.: tissue autofluorescence was detected for image contrast and anatomical reference. AL: annular ligament; C: cornea; GCL: ganglion cell layer; IBC: iris blood cells; IPL: inner plexiform layer; INL: inner nuclear layer; NPCE: non pigment ciliary epithelium; OPL: outer plexiform layer; ONL: outer nuclear layer; PHL: photoreceptor layer. R: retina; Tg/+ : transgenic; +/+ : wild type. The images are representative of the results observed in two fishes of each genotype.
