# Supplementary material for: Transgenic Overexpression of Myocilin Leads to Variable Ocular Anterior Segment and Retinal Alterations Associated with Extracellular Matrix Abnormalities in Adult Zebrafish
Source: Preprints.org preprint supplement (doi:10.20944/preprints202208.0053.v1), 2022-08-02
Supplement: Supplementary file 1 [file supplementary]

## Sheet: data3_CF_R_vs_WT_2_R_fc2_&_raw.
Supplementary Table S8. Raw RNAseq data used to identify DEGs comparing the transcriptome of altered transgenic eyes (Tg_OA) with replica 2 of the ocular wild type transcriptome (WT_2).
Gene_ID	Transcript_ID	Gene_Symbol	Description	gene_biotype	Protein_ID	ZFIN	Fold-change (Tg_OA vs. WT_2)	Log reads per million mapped reads (Tg_OA_R vs. WT_2)	Raw p value (Tg_OA_R/WT_2)	Benjamini-Hochberg adjusted p-value (Tg_OA_R/WT_2)	Tg_OA mean	WT_2 mean	Tg_OA Read Count	WT_2 Read Count	Tg_OA_R fragments per kilobase of transcript per million fragments mapped	WT_2 fragments per kilobase of transcript per million fragments mapped	Tg_OA transcripts per million	WT_2 transcripts per million
30038	NM_130908,NM_130908_dup1	sox19a	SRY (sex determining region Y)-box 19a	protein_coding	NP_570983.2	ZDB-GENE-980526-102	-12.6903	2.01666	4.25214e-29	3.02146e-27	0.664862	3.08168	25	273	0.174417	1.98964	0.295541	1.08323
30067	NM_001312685,NM_130911,XM_009298917	chico	chico	protein_coding	NP_001299614.1;NP_570986.1;XP_009297192.1	ZDB-GENE-000210-28	-2.09354	0.709738	0.00172952	0.00546613	1.02172	1.66015	44	79	0.43456	0.808763	0.736339	1.2886
30070	NM_130914,NM_130914_dup1	tbx4	T-box 4	protein_coding	NP_570989.2	ZDB-GENE-991124-5	2.65615	0.938464	3.23136e-05	0.000156063	1.88476	1.00854	115	37	0.797913	0.262808	1.11488	0.418731
30072	NM_130916	inhbaa	inhibin, beta Aa	protein_coding	NP_570991.1	ZDB-GENE-000210-21	2.35835	3.52386	9.40583e-08	7.55664e-07	4.09287	2.96526	686	249	3.1199	1.16256	5.28651	1.85231
30079	NM_130922	btg2	B-cell translocation gene 2	protein_coding	NP_570997.1	ZDB-GENE-000210-15	-2.10537	6.43764	2.99215e-07	2.20555e-06	5.82787	6.88859	2383	4296	17.8084	32.973	30.1754	52.5357
30084	NM_130927	nme2b.2	NME/NM23 nucleoside diphosphate kinase 2b, tandem duplicate 2	protein_coding	NP_571002.1	ZDB-GENE-000210-33	2.5702	6.32433	1.18002e-10	1.47297e-09	6.86146	5.51887	4923	1640	93.7842	32.0846	158.912	51.1202
30093	NM_001308956,NM_130930	elk4	ELK4, ETS-domain protein	protein_coding	NP_001295885.1;NP_571005.2	ZDB-GENE-030716-1	-2.36751	0.337788	0.000855913	0.00292675	0.787362	1.44516	31	63	0.227905	0.51629	0.386172	0.822603
30095	NM_130932,NM_130932_dup1	ckma	creatine kinase, muscle a	protein_coding	NP_571007.2	ZDB-GENE-980526-109	2.64419	5.80557	4.62547e-11	6.0957e-10	6.35876	4.98446	3462	1121	33.9994	11.2991	57.6102	18.0028
30100	NM_001008611,NM_001008611_dup1	ube2kb	ubiquitin-conjugating enzyme E2Kb (UBC1 homolog, yeast)	protein_coding	NP_001008611.1	ZDB-GENE-980605-9	-2.6131	3.64078	1.91956e-09	2.0258e-08	2.97902	4.24755	294	658	3.0192	6.95268	5.11588	11.0777
30120	NM_130944,NM_130944_dup1	dlc	deltaC	protein_coding	NP_571019.1	ZDB-GENE-000125-4	3.02899	2.81015	1.72864e-10	2.11264e-09	3.5165	2.15246	446	126	1.9355	0.558954	1.24837	0.890579
30121	NM_130945,XM_009307792,XM_017358976	flt4	fms-related tyrosine kinase 4	protein_coding	NP_571020.2;XP_009306067.1;XP_017214465.1	ZDB-GENE-980526-326	3.3642	2.42883	3.45011e-11	4.65168e-10	3.20098	1.77988	350	89	1.18276	0.298437	2.00412	0.475499
30125	NM_130948,XM_017351595,XM_021467105	gdf3	growth differentiation factor 3	protein_coding	NP_571023.1;XP_017207084.1;XP_021322780.1	ZDB-GENE-980526-389	2.61389	4.542	3.48385e-10	4.07117e-09	5.11282	3.79218	1435	470	12.0318	3.94408	20.3873	6.28409
30127	NM_130950,NM_130950_dup1	wnt2	wingless-type MMTV integration site family member 2	protein_coding	NP_571025.1	ZDB-GENE-980526-416	4.52153	-0.416472	2.23745e-05	0.000111888	1.08678	0.317457	48	9	0.494763	0.089402	0.83835	0.142444
30131	NM_130954	dla	deltaA	protein_coding	NP_571029.2	ZDB-GENE-980526-29	2.22753	0.107135	0.00433438	0.0122599	1.26604	0.70399	60	23	0.229571	0.088498	0.388996	0.141003
30138	NM_130955	dld	deltaD	protein_coding	NP_571030.2	ZDB-GENE-990415-47	3.33489	1.32284	3.76639e-08	3.2242e-07	2.24691	1.08493	160	41	0.737725	0.193994	1.25004	0.309089
30148	NM_001328376,NM_130963	desma	desmin a	protein_coding	NP_001315305.1;NP_571038.2	ZDB-GENE-980526-221	3.21054	2.6131	7.20348e-11	9.21039e-10	3.35419	1.95291	394	105	3.38078	0.921777	5.72856	1.46866
30151	NM_130964,XM_021477390	isl2b	ISL LIM homeobox 2b	protein_coding	NP_571039.1;XP_021333065.1	ZDB-GENE-990415-133	5.19099	3.68544	1.4192e-22	6.40557e-21	4.48862	2.35883	916	151	8.77313	1.46508	14.8656	2.33431
30157	NM_130970,XM_005163157,XM_021470443,XM_021470444	isl2a	ISL LIM homeobox 2a	protein_coding	NP_571045.1;XP_005163214.1;XP_021326118.1;XP_021326119.1	ZDB-GENE-980526-562	3.01128	2.02678	9.9101e-09	9.31364e-08	2.81108	1.58323	257	73	2.2179	0.601173	3.75811	0.957847
30159	NM_130972	tTg_OA15	transcription factor 15	protein_coding	NP_571047.1	ZDB-GENE-980605-20	2.33173	1.04919	0.000150657	0.000625128	1.92979	1.13967	120	44	1.8424	0.686318	3.12185	1.09351
30177	NM_130986,XM_005156617,XM_005156618,XM_005156619,XM_005156620,XM_005156621,XM_009307224	ikzf1	IKAROS family zinc finger 1 (Ikaros)	protein_coding	NP_571061.1;XP_005156674.1;XP_005156675.1;XP_005156676.1;XP_005156677.1;XP_005156678.1;XP_009305499.1	ZDB-GENE-980526-304	2.74504	0.585171	7.38468e-05	0.000328515	1.63575	0.820276	90	28	0.471793	0.150939	0.799428	0.240491
30181	NM_130988	ptch2	patched 2	protein_coding	NP_571063.2	ZDB-GENE-980526-44	2.3703	0.577951	0.00061055	0.00216994	1.5916	0.885799	86	31	0.274288	0.098815	0.464767	0.157441
30186	NM_130993	crestin	crestin	protein_coding	NP_571068.2	ZDB-GENE-000208-13	5.8538	-1.17049	0.000488104	0.00178203	0.727412	0.149769	28	4	0.095859	0.013136	0.162427	0.02093
30188	NM_130995,NM_130995_dup1	ccne1	cyclin E1	protein_coding	NP_571070.1	ZDB-GENE-980526-168	-2.59134	1.20759	9.43666e-06	5.08926e-05	1.17919	2.0982	54	120	0.395725	0.912965	0.423663	0.867929
30189	NM_001305542,NM_001305542_dup1,NM_001305542_dup2,XR_001800065	ptch1	patched 1	protein_coding	NP_001292471.1	ZDB-GENE-980526-196	3.48205	1.33545	1.2817e-08	1.1834e-07	2.26811	1.06621	163	40	0.525586	0.129267	0.660784	0.190406
30192	NM_130998,XM_005171551,XM_005171552	ntn1b	netrin 1b	protein_coding	NP_571073.1;XP_005171608.1;XP_005171609.1	ZDB-GENE-990415-168	4.36402	0.317241	2.71226e-07	2.01579e-06	1.54605	0.52363	82	16	0.252478	0.049288	0.42781	0.07853
30194	NM_131000,NM_131000_dup1,XM_005172635	alcama	activated leukocyte cell adhesion molecule a	protein_coding	NP_571075.1;XP_005172692.1	ZDB-GENE-990415-30	-2.05864	6.77639	6.11275e-07	4.21678e-06	6.18299	7.21447	3060	5394	15.81	29.6626	21.0459	35.1701
30230	NM_131032	inab	internexin neuronal intermediate filament protein, alpha b	protein_coding	NP_571107.2	ZDB-GENE-990415-83	2.23682	5.08245	7.22788e-08	5.90843e-07	5.57712	4.45246	1996	764	16.1989	6.3685	27.4481	10.1469
30239	NM_131041	neurog1	neurogenin 1	protein_coding	NP_571116.1	ZDB-GENE-990415-174	2.77428	0.383583	0.000167219	0.000684396	1.49902	0.728009	78	24	0.871783	0.265781	1.47719	0.423468
30242	NM_001328532,NM_131043	mest	mesoderm specific transcript	protein_coding	NP_001315461.1;NP_571118.2	ZDB-GENE-991111-5	2.09861	5.70077	4.45366e-07	3.16145e-06	6.15719	5.10972	3005	1226	31.7282	13.2872	53.7618	21.1704
30253	NM_131051,NM_131051_dup1,XM_017359202	tbx2b	T-box 2b	protein_coding	NP_571126.1	ZDB-GENE-990726-27	2.03447	5.47992	1.42252e-06	9.06386e-06	5.92503	4.92466	2552	1074	16.1025	7.00876	19.1199	7.97416
30259	NM_001319237,XM_017358198	prph	peripherin	protein_coding	NP_001306166.1;XP_017213687.1	ZDB-GENE-990415-207	2.01863	3.06369	2.12707e-05	0.000106979	3.59687	2.69976	474	201	3.50351	1.5197	5.93651	2.42132
30264	NM_131058	tbx16	T-box 16	protein_coding	NP_571133.1	ZDB-GENE-990615-5	7.57976	-0.355623	9.9317e-08	7.93668e-07	1.17919	0.2192	54	6	0.325819	0.034791	0.552083	0.055432
30266	NM_131060,NM_131060_dup1	sema3aa	sema domain, immunoglobulin domain (Ig), short basic domain, secreted, (semaphorin) 3Aa	protein_coding	NP_571135.1	ZDB-GENE-991209-3	2.29603	2.48803	2.8222e-06	1.70328e-05	3.12557	2.12559	330	123	1.62367	0.622358	1.9634	0.9916
30267	NM_131061,NM_131061_dup1	sema3ab	sema domain, immunoglobulin domain (Ig), short basic domain, secreted, (semaphorin) 3Ab	protein_coding	NP_571136.1	ZDB-GENE-991209-6	-4.0938	0.720442	1.48915e-08	1.36002e-07	0.706862	1.84722	27	95	0.177503	0.641809	0.30077	1.02259
30269	NM_131063,NM_131063_dup1	shha	sonic hedgehog a	protein_coding	NP_571138.1	ZDB-GENE-980526-166	2.94285	0.194756	0.000147133	0.000611832	1.38722	0.629436	69	20	0.40874	0.117145	0.318474	0.049223
30270	NM_131064,XM_005161919,XM_009296612	ngfa	nerve growth factor a (beta polypeptide)	protein_coding	NP_571139.1;XP_005161976.1;XP_009294887.2	ZDB-GENE-990415-176	-14.8042	0.610839	1.43764e-17	4.03709e-16	0.247725	1.93238	8	103	0.086945	1.28104	0.147324	2.04108
30273	NM_001313699,NM_001313700	snai1a	snail family zinc finger 1a	protein_coding	NP_001300628.1;NP_001300629.1	ZDB-GENE-990415-255	3.35821	2.29287	9.27542e-11	1.17312e-09	3.07835	1.6849	318	81	2.52602	0.652447	4.2802	1.03954
30274	NM_131067,XM_005158751	foxg1a	forkhead box G1a	protein_coding	NP_571142.1;XP_005158808.1	ZDB-GENE-990415-267	2.90341	3.2828	1.31046e-10	1.62901e-09	3.94278	2.57289	614	181	3.13989	1.00686	5.32037	1.60422
30276	NM_131069	cx43.4	connexin 43.4	protein_coding	NP_571144.2	ZDB-GENE-990415-38	-3.55142	5.98869	1.73705e-17	4.80096e-16	4.85246	6.64464	1191	3622	7.82318	24.4416	13.256	38.9427
30281	NM_131074	npy	neuropeptide Y	protein_coding	NP_571149.1	ZDB-GENE-980526-438	2.5076	4.95891	1.07819e-09	1.18174e-08	5.50381	4.22452	1895	647	40.3663	14.1414	68.3986	22.5314
30301	NM_131090	her4.2	hairy-related 4, tandem duplicate 2	protein_coding	NP_571165.3	ZDB-GENE-060815-1	3.69315	0.292756	3.61545e-06	2.13666e-05	1.49902	0.577503	78	18	0.690868	0.163658	1.17064	0.260755
30304	NM_001328408,NM_131092	tdgf1	teratocarcinoma-derived growth factor 1	protein_coding	NP_001315337.1;NP_571167.2	ZDB-GENE-990415-198	-2.57092	-0.668224	0.0103064	0.0260452	0.409074	0.885799	14	31	0.114909	0.261245	0.194707	0.41624
30324	NM_131105	tpma	alpha-tropomyosin	protein_coding	NP_571180.1	ZDB-GENE-990415-269	2.52519	7.30011	1.81317e-10	2.20953e-09	7.82457	6.49782	9638	3268	108.479	37.7686	183.812	60.1766
30327	NM_131107	cyt1	type I cytokeratin, enveloping layer	protein_coding	NP_571182.1	ZDB-GENE-991008-6	-2.20834	7.43387	4.15435e-08	3.53044e-07	6.76505	7.90076	4602	8702	51.8303	100.658	87.8237	160.378
30332	NM_131111	lmo2	LIM domain only 2 (rhombotin-like 1)	protein_coding	NP_571186.1	ZDB-GENE-980526-419	2.49786	2.08026	1.12298e-06	7.29227e-06	2.79656	1.75671	254	87	2.3106	0.810199	3.91518	1.29089
30339	NM_131117,XM_005171554,XM_005171562,XM_017353138,XM_017353140,XM_017353141,XM_017353143,XM_021469305,XM_021469306,XM_021469307	hoxb3a	homeobox B3a	protein_coding	NP_571192.2;XP_005171611.1;XP_005171619.1;XP_017208627.1;XP_017208629.1;XP_017208630.1;XP_017208632.1;XP_021324980.1;XP_021324981.1;XP_021324982.1	ZDB-GENE-990415-104	2.63225	0.330034	0.000283508	0.00109736	1.4504	0.728009	74	24	0.249533	0.066761	0.422819	0.106369
30345	NM_131122,XM_021469725	hoxc4a	homeobox C4a	protein_coding	NP_571197.1;XP_021325400.1	ZDB-GENE-990415-112	2.00998	-0.655222	0.0443348	0.0896298	0.825989	0.467668	33	14	0.330754	0.151372	0.560446	0.241181
30364	NM_131134	fzd5	frizzled class receptor 5	protein_coding	NP_571209.2	ZDB-GENE-990415-218	2.37083	1.9606	6.38111e-06	3.58477e-05	2.67487	1.70924	230	83	1.8511	0.68613	3.1366	1.09321
30366	NM_130917	fzd10	frizzled class receptor 10	protein_coding	NP_570992.2	ZDB-GENE-990415-220	-2.8394	5.13517	4.03146e-12	6.05669e-11	4.26966	5.72612	781	1899	4.05542	10.1252	6.87169	16.1325
30369	NM_131139,NM_131139_dup1	fzd7a	frizzled class receptor 7a	protein_coding	NP_571214.1	ZDB-GENE-990415-223	2.85925	1.91219	7.34913e-08	6.00521e-07	2.69588	1.54318	234	70	1.32433	0.406525	1.6849	0.620048
30381	NM_131146	cyp26a1	cytochrome P450, family 26, subfamily A, polypeptide 1	protein_coding	NP_571221.2	ZDB-GENE-990415-44	2.52638	5.77735	3.34988e-10	3.93181e-09	6.31275	5.00303	3352	1136	28.3324	9.8586	48.0078	15.7077
30396	NM_131159,XM_017358977,XM_017358978,XM_017358979,XM_017358980	ef1	E74-like factor 1 (ets domain transcription factor)	protein_coding	NP_571234.2;XP_017214466.1;XP_017214467.1;XP_017214468.1;XP_017214469.1	ZDB-GENE-980526-335	-2.13225	5.7476	2.41613e-07	1.81624e-06	5.14086	6.21143	1464	2673	5.04873	9.48174	8.55481	15.1072
30398	NM_131161,NM_131161_dup1	pou3f1	POU class 3 homeobox 1	protein_coding	NP_571236.1	ZDB-GENE-980526-372	2.05777	2.57532	3.1903e-05	0.000154363	3.15999	2.27979	339	141	1.82702	0.776853	1.73177	0.477542
30400	NM_001159768,NM_131163	b2m	beta-2-microglobulin	protein_coding	NP_001153240.1;NP_571238.1	ZDB-GENE-980526-88	-2.09307	9.14438	2.64235e-07	1.9708e-06	8.51918	9.58276	15625	28003	213.81	392.246	362.29	624.964
30415	NM_131177,NM_131177_dup1	jupa	junction plakoglobin a	protein_coding	NP_571252.1	ZDB-GENE-991207-22	-5.92062	8.53614	3.24443e-32	2.78531e-30	6.75851	9.31318	4581	23224	21.9188	114.119	35.7772	181.826
30421	NM_001134685,XM_005162365,XM_005162366,XM_005162367,XM_021469727	hoxc3a	homeo box C3a	protein_coding	NP_001128157.2;XP_005162422.1;XP_005162423.1;XP_005162424.1;XP_021325402.1	ZDB-GENE-980526-532	3.62636	-0.979016	0.00275824	0.00824767	0.767654	0.252701	30	7	0.180554	0.0408	0.305939	0.065006
30429	NM_131188,NM_131188_dup1,NM_131188_dup2	mylpfa	myosin light chain, phosphorylatable, fast skeletal muscle a	protein_coding	NP_571263.1	ZDB-GENE-990712-15	2.40468	6.67476	1.71383e-09	1.82332e-08	7.18213	5.93013	6159	2193	68.1327	24.9144	60.5299	24.5446
30436	NM_131193,NM_131193_dup1,XM_005162633,XM_005162634,XM_005162635,XM_009297325,XM_009297326,XM_009297327,XM_017353800	eya1	EYA transcriptional coactivator and phosphatase 1	protein_coding	NP_571268.1;XP_005162690.1;XP_005162691.1;XP_005162692.1;XP_009295600.2;XP_009295601.2;XP_009295602.1;XP_017209289.1	ZDB-GENE-990712-18	3.03575	1.11523	1.01134e-06	6.6225e-06	2.05702	1.02802	135	38	0.691139	0.135844	1.02421	0.21644
30440	NM_201448	prim1	primase, DNA, polypeptide 1	protein_coding	NP_958856.1	ZDB-GENE-990603-6	-2.81007	2.8605	1.54292e-09	1.65236e-08	2.26108	3.5442	162	390	1.5196	3.77126	2.57487	6.00873
30455	NM_131208	lhx3	LIM homeobox 3	protein_coding	NP_571283.1	ZDB-GENE-980526-131	2.13516	0.124784	0.00629561	0.0170397	1.26604	0.728009	60	24	0.743599	0.296372	1.25999	0.472208
30456	NM_131209	pcdh8	protocadherin 8	protein_coding	NP_571284.1	ZDB-GENE-980526-242	2.86101	1.49285	4.96587e-07	3.48855e-06	2.34326	1.27626	174	52	0.866433	0.262988	1.46812	0.419018
30457	NM_131210	acvr2b	activin A receptor, type IIB	protein_coding	NP_571285.1	ZDB-GENE-980526-549	-2.8862	0.236352	0.000144046	0.000600537	0.664862	1.43059	25	62	0.086282	0.225441	0.1462	0.359194
30463	NM_131216	lhx1a	LIM homeobox 1a	protein_coding	NP_571291.1	ZDB-GENE-980526-347	2.45413	2.53178	4.08365e-07	2.92347e-06	3.18992	2.10739	347	121	2.3913	0.852342	4.05193	1.35803
30473	NM_131226	rx2	retinal homeobox gene 2	protein_coding	NP_571301.2	ZDB-GENE-990415-237	2.42968	3.434	4.54486e-08	3.83288e-07	4.01978	2.8605	650	229	6.75825	2.44325	11.4515	3.89282
30474	NM_131227	rx3	retinal homeobox gene 3	protein_coding	NP_571302.1	ZDB-GENE-990415-238	2.23901	4.90084	8.23664e-08	6.68885e-07	5.39963	4.27837	1760	673	20.9603	8.22798	35.5161	13.1096
30476	NM_131229	wif1	wnt inhibitory factor 1	protein_coding	NP_571304.1	ZDB-GENE-990712-17	-3.00774	1.25326	3.35589e-07	2.43983e-06	1.11825	2.17884	50	129	0.414724	1.09056	0.702727	1.73758
30480	NM_131233,XM_009305781,XM_009305782,XM_021479548	gata2a	GATA binding protein 2a	protein_coding	NP_571308.1;XP_009304056.1;XP_009304057.1;XP_021335223.1	ZDB-GENE-980526-260	3.40212	2.40885	2.5881e-11	3.5279e-10	3.18621	1.75671	346	87	2.25272	0.514145	3.81711	0.819184
30498	NM_131248,NM_131248_dup1	egr1	early growth response 1	protein_coding	NP_571323.1	ZDB-GENE-980526-320	-2.90033	4.41072	5.31164e-12	7.8898e-11	3.57152	5.02622	465	1155	4.68371	11.9521	7.93631	19.0432
30503	NM_131253	opn1mw1	opsin 1 (cone pigments), medium-wave-sensitive, 1	protein_coding	NP_571328.2	ZDB-GENE-990604-42	-3.36575	6.55591	2.0375e-16	5.03581e-15	5.46227	7.19009	1840	5303	18.2511	54.0348	30.9256	86.0934
30507	NM_131257	hbaa1	hemoglobin, alpha adult 1	protein_coding	NP_571332.2	ZDB-GENE-980526-79	4.90192	7.91856	1.78394e-26	1.06595e-24	8.65386	6.37438	17158	2997	457.401	82.0305	775.041	130.699
30510	NM_131259,NM_131259_dup1	tcf7l2	transcription factor 7-like 2 (T-cell specific, HMG-box)	protein_coding	NP_571334.1	ZDB-GENE-991110-8	-3.30202	2.34256	6.51376e-11	8.37433e-10	1.74057	3.12755	100	283	0.720037	2.09629	1.22007	3.34001
30513	NM_131262	myod1	myogenic differentiation 1	protein_coding	NP_571337.2	ZDB-GENE-980526-561	3.7301	-0.137359	6.10845e-05	0.000277313	1.22327	0.438851	57	13	0.505771	0.113358	0.857003	0.180613
30519	NM_001309822,NM_001309822_dup1,NM_131266,NM_131266_dup1	myb	v-myb avian myeloblastosis viral oncogene homolog	protein_coding	NP_001296751.1;NP_571341.2	ZDB-GENE-991110-14	-2.03128	4.56103	2.66859e-06	1.61428e-05	4.04864	5.02622	664	1155	3.22483	5.89008	5.46431	9.34657
30524	NM_131270,NM_131270_dup1	foxd5	forkhead box D5	protein_coding	NP_571345.1	ZDB-GENE-980605-4	2.50814	-0.187139	0.00337687	0.00986331	1.11825	0.550818	50	17	0.671726	0.221398	1.1382	0.352753
30526	NM_131272	msx3	muscle segment homeobox 3	protein_coding	NP_571347.2	ZDB-GENE-980526-306	-3.71473	1.05607	1.04967e-08	9.83417e-08	0.900271	2.07966	37	118	0.278367	0.924432	0.471678	1.47289
30527	NM_131273	msx1a	muscle segment homeobox 1a	protein_coding	NP_571348.1	ZDB-GENE-980526-312	4.21936	-1.01649	0.00128011	0.00419647	0.767654	0.2192	30	6	0.421514	0.081499	0.714234	0.129852
30529	NM_001001811	sox3	SRY (sex determining region Y)-box 3	protein_coding	NP_001001811.2	ZDB-GENE-980526-333	-4.93518	5.03698	1.29464e-24	6.9821e-23	3.59128	5.79596	472	1995	4.13919	17.9819	7.01364	28.6505
30531	NM_131276	msx2b	muscle segment homeobox 2b	protein_coding	NP_571351.3	ZDB-GENE-980526-492	-9.9404	2.4025	4.09368e-29	2.93802e-27	0.970915	3.40215	41	350	0.418518	3.68746	0.709157	5.87521
30534	NM_131278	pou4f3	POU class 4 homeobox 3	protein_coding	NP_571353.1	ZDB-GENE-990415-24	35.7231	1.65505	5.01131e-33	4.54322e-31	2.80142	0.2192	255	6	3.96459	0.081432	6.7178	0.129745
30538	NM_131281	fgf8a	fibroblast growth factor 8a	protein_coding	NP_571356.2	ZDB-GENE-990415-72	2.26482	1.94874	1.90043e-05	9.63177e-05	2.64818	1.73317	225	85	1.62592	0.628551	2.75504	1.00147
30541	NM_131284	foxa1	forkhead box A1	protein_coding	NP_571359.2	ZDB-GENE-990415-78	2.54332	-1.32711	0.048953	0.0973326	0.577005	0.252701	21	7	0.163669	0.055999	0.277329	0.089223
30554	NM_131295	pla2g4aa	phospholipase A2, group IVAa (cytosolic, calcium-dependent)	protein_coding	NP_571370.1	ZDB-GENE-990415-45	-2.17652	2.72722	5.55157e-06	3.16097e-05	2.3631	3.32551	177	330	1.05342	2.02114	1.78496	3.22027
30558	NM_131298,XM_005158833	pax9	paired box 9	protein_coding	NP_571373.1;XP_005158890.1	ZDB-GENE-980526-399	5.28403	0.844693	1.5595e-10	1.91931e-09	1.96483	0.629436	124	20	1.00378	0.172099	1.70085	0.274205
30559	NM_131299	foxa3	forkhead box A3	protein_coding	NP_571374.1	ZDB-GENE-980526-423	3.55873	0.174531	1.49312e-05	7.73324e-05	1.41283	0.550818	71	17	0.432995	0.107864	0.733687	0.171859
30561	NM_131300	dlx4a	distal-less homeobox 4a	protein_coding	NP_571375.1	ZDB-GENE-980526-73	-12.071	1.83141	7.8712e-27	4.85498e-25	0.621602	2.91383	23	239	0.287777	3.11721	0.487623	4.96664
30569	NM_131306	dlx5a	distal-less homeobox 5a	protein_coding	NP_571381.2	ZDB-GENE-990415-49	2.07237	1.16842	0.000897488	0.00305253	1.98203	1.27626	126	52	1.49774	0.634908	2.53785	1.0116
30581	NM_131318	dlx4b	distal-less homeobox 4b	protein_coding	NP_571393.1	ZDB-GENE-990415-50	-3.66376	2.10228	1.09423e-11	1.56033e-10	1.49902	2.94491	78	245	0.952861	3.07903	1.61457	4.90581
30585	NM_131322	dlx3b	distal-less homeobox 3b	protein_coding	NP_571397.2	ZDB-GENE-980526-280	-4.35434	5.48113	5.78162e-22	2.47668e-20	4.14345	6.20181	712	2655	7.02557	26.9245	11.9045	42.8987
30600	NM_131335	mid1ip1a	MID1 interacting protein 1a	protein_coding	NP_571410.1	ZDB-GENE-990415-81	-2.73398	5.35446	1.69727e-11	2.37201e-10	4.51693	5.92754	935	2189	11.81	28.396	20.0113	45.2432
30604	NM_131338,NM_131338_dup1,XM_021468751	cfb	complement factor B	protein_coding	NP_571413.2;XP_021324426.1	ZDB-GENE-980526-487	-3.1493	-0.468686	0.000820646	0.00282037	0.409074	1.02802	14	38	0.077624	0.247378	0.065576	0.394146
30606	NM_131339	rarga	retinoic acid receptor gamma a	protein_coding	NP_571414.1	ZDB-GENE-980526-531	-2.63495	4.28116	3.67578e-10	4.28088e-09	3.54572	4.86498	456	1029	3.43334	7.9663	5.81762	12.6927
30616	NM_001112733	vmhc	ventricular myosin heavy chain	protein_coding	NP_001106204.1	ZDB-GENE-991123-5	2.30326	2.29262	4.92325e-06	2.83701e-05	2.95308	1.97315	288	107	0.744377	0.281695	1.26131	0.448823
30634	NM_131361,NM_131361_dup1,XM_005162225,XM_021469729	nadl1.2	neural adhesion molecule L1.2	protein_coding	NP_571436.1;XP_005162282.1;XP_021325404.1	ZDB-GENE-990415-10	3.39736	1.3431	2.07227e-08	1.8453e-07	2.26811	1.08493	163	41	0.56169	0.144763	0.734791	0.148593
30645	NM_131372	cd74b	CD74 molecule, major histocompatibility complex, class II invariant chain b	protein_coding	NP_571447.1	ZDB-GENE-990910-10	-2.21437	8.17134	3.41632e-08	2.9461e-07	7.49464	8.63716	7659	14522	114.937	223.814	194.754	356.602
30647	NM_131374	psme2	proteasome activator subunit 2	protein_coding	NP_571449.1	ZDB-GENE-991110-16	-2.22914	6.36626	3.71739e-08	3.18484e-07	5.70243	6.8436	2181	4163	24.4786	47.9834	41.4777	76.4517
30648	NM_131375,NM_131375_dup1	psme1	proteasome activator subunit 1	protein_coding	NP_571450.1	ZDB-GENE-991110-17	-2.18697	5.20863	1.3e-07	1.02255e-06	4.59589	5.69218	990	1854	14.2567	27.4254	23.8753	42.766
30651	NM_131378,NM_131378_dup1,XM_021480025	pth1rb	parathyroid hormone 1 receptor b	protein_coding	NP_571453.1;XP_021335700.1	ZDB-GENE-991123-12	2.38156	-0.936974	0.0324684	0.0690084	0.727412	0.348776	28	10	0.200728	0.070219	0.340123	0.111879
30656	NM_131383,XM_009296546	nadl1.1	neural adhesion molecule L1.1	protein_coding	NP_571458.1;XP_009294821.1	ZDB-GENE-980526-512	3.71624	2.6024	4.81959e-13	8.11612e-12	3.38686	1.82512	404	93	0.996404	0.229129	1.68836	0.365069
30665	NM_131391	psmb9a	proteasome subunit beta 9a	protein_coding	NP_571466.1	ZDB-GENE-990415-140	-10.4605	4.46203	2.89869e-43	4.45024e-41	2.27511	5.36463	164	1470	2.30144	21.2677	3.89967	33.8857
30671	NM_131397	hsp70.3	heat shock cognate 70-kd protein, tandem duplicate 3	protein_coding	NP_571472.2	ZDB-GENE-110713-1	-3.1852	4.43587	7.96463e-14	1.48511e-12	3.50166	5.0832	441	1203	2.89051	8.11437	4.89782	12.9286
30672	NM_131398	ppm1ba	protein phosphatase, Mg2+/Mn2+ dependent, 1Ba	protein_coding	NP_571473.1	ZDB-GENE-991102-16	-6.03944	2.19103	2.09705e-19	7.04587e-18	1.19403	3.13655	55	285	0.584886	3.15062	0.991058	5.01987
30681	NM_131407	mapk12a	mitogen-activated protein kinase 12a	protein_coding	NP_571482.1	ZDB-GENE-990415-257	-2.54412	4.66383	7.64422e-10	8.56584e-09	3.93397	5.22286	610	1329	5.4392	12.1655	9.21644	19.3832
30685	NM_131411	aanat2	arylalkylamine N-acetyltransferase 2	protein_coding	NP_571486.1	ZDB-GENE-991019-6	2.14955	7.51684	1.14512e-07	9.07166e-07	7.97098	6.87352	10672	4251	117.806	48.1945	199.616	76.788
30687	XM_682606	epha4l	eph receptor A4, like	protein_coding	XP_687698.2	ZDB-GENE-990415-61	2.8562	0.936136	9.47476e-06	5.10327e-05	1.90294	0.968776	117	35	0.312492	0.094106	0.529501	0.149938
30705	NM_001309399,NM_001309400,NM_152962,XM_009304303,XM_009304304	fgfr1a	fibroblast growth factor receptor 1a	protein_coding	NP_001296328.1;NP_001296329.1;NP_694494.2;XP_009302578.1;XP_009302579.1	ZDB-GENE-980526-255	-2.67011	2.85051	7.91917e-09	7.57453e-08	2.29589	3.51689	167	382	0.728878	1.734	1.23505	2.76278
30718	NM_131441	notch1a	notch 1a	protein_coding	NP_571516.1	ZDB-GENE-990415-173	2.52588	2.34548	2.98471e-07	2.20194e-06	3.03367	1.94268	307	104	0.63481	0.219746	1.07565	0.35012
30721	NM_131443,NM_131443_dup1	pdx1	pancreatic and duodenal homeobox 1	protein_coding	NP_571518.2	ZDB-GENE-990415-122	12.0745	-0.0258096	2.35366e-11	3.22925e-10	1.42546	0.184902	72	5	0.99743	0.064104	1.47128	0
30724	NM_206888	melk	maternal embryonic leucine zipper kinase	protein_coding	NP_996771.2	ZDB-GENE-990603-5	4.39872	3.54467	9.53271e-19	3.04713e-17	4.3145	2.40426	807	157	4.86143	0.968936	8.23743	1.5438
30726	NM_131446,NM_131446_dup1	cntn2	contactin 2	protein_coding	NP_571521.1	ZDB-GENE-990630-12	6.27381	-0.37559	6.96931e-07	4.75002e-06	1.14904	0.252701	52	7	0.230418	0.030533	0.390431	0.048649
30733	NM_131450	rrm2	ribonucleotide reductase M2 polypeptide	protein_coding	NP_571525.1	ZDB-GENE-990415-25	-2.3687	5.33578	5.91515e-09	5.77462e-08	4.64127	5.85168	1023	2075	7.66402	15.9644	12.9863	25.436
30741	NM_131456	ctnna1	catenin (cadherin-associated protein), alpha 1	protein_coding	NP_571531.1	ZDB-GENE-991207-24	-3.65643	6.56245	2.15915e-18	6.5912e-17	5.37785	7.22294	1733	5426	7.18764	23.1126	12.1791	36.8252
30742	NM_131457,XM_021476002	bmpr1ba	bone morphogenetic protein receptor, type IBa	protein_coding	NP_571532.1;XP_021331677.1	ZDB-GENE-991208-8	3.13985	3.01991	2.13662e-11	2.95655e-10	3.72247	2.28789	521	142	4.12363	1.15391	6.98728	1.83852
30746	NM_001346150,NM_001346150_dup1,XM_001334637	tie1	endothelium-specific receptor tyrosine kinase 1	protein_coding	NP_001333079.1;XP_001334673.5	ZDB-GENE-990415-55	6.88474	3.10512	4.21397e-26	2.44841e-24	3.99032	1.66015	636	79	1.56525	0.196011	1.84534	0.21264
30750	XM_694808	pparda	peroxisome proliferator-activated receptor delta a	protein_coding	XP_699900.6	ZDB-GENE-990415-212	-2.58864	2.2201	2.22072e-07	1.68197e-06	1.83828	2.93977	110	244	0.308132	0.705386	0.522113	1.12389
30766	NM_213237	tal1	T-cell acute lymphocytic leukemia 1	protein_coding	NP_998402.1	ZDB-GENE-980526-501	2.0496	1.86791	0.000202057	0.000811197	2.54197	1.74499	206	86	1.21216	0.517997	2.05394	0.825322
30768	NM_131480	stat1a	signal transducer and activator of transcription 1a	protein_coding	NP_571555.1	ZDB-GENE-980526-499	-2.15215	5.57656	1.87661e-07	1.43687e-06	4.96598	6.04692	1292	2381	7.93659	15.0217	13.4481	23.934
30967	NM_131491,XM_009294198,XM_021467992	igf2bp3	insulin-like growth factor 2 mRNA binding protein 3	protein_coding	NP_571566.1;XP_009292473.1;XP_021323667.1	ZDB-GENE-000308-1	2.52034	0.958469	6.87013e-05	0.000307642	1.88476	1.04724	115	39	0.305042	0.104838	0.516878	0.167037
57923	NM_131495	pycard	PYD and CARD domain containing	protein_coding	NP_571570.2	ZDB-GENE-000511-2	-4.11617	5.21377	2.57173e-20	9.60769e-19	3.95372	5.92299	619	2182	10.5356	38.169	17.852	60.8145
57936	NM_131506,XM_021466746	tbx20	T-box 20	protein_coding	NP_571581.2;XP_021322421.1	ZDB-GENE-000427-7	3.36852	0.337265	9.38434e-06	5.06364e-05	1.51092	0.629436	79	20	0.194544	0.049972	0.329645	0.07962
57957	NM_001020474,XM_005166394	slc7a6	solute carrier family 7 (amino acid transporter light chain, y+L system), member 6	protein_coding	NP_001018310.1;XP_005166451.1	ZDB-GENE-000607-21	-2.07509	3.10571	8.67197e-06	4.72288e-05	2.71659	3.65171	238	423	0.831681	1.53247	1.40924	2.44168
58008	NM_212561	hey1	hes-related family bHLH transcription factor with YRPW motif 1	protein_coding	NP_997726.1	ZDB-GENE-000607-70	4.63098	4.39926	8.64468e-22	3.64376e-20	5.15325	3.08168	1477	273	6.92794	1.31305	11.739	2.09207
58022	NM_131510,XM_005165837	casp8	caspase 8, apoptosis-related cysteine peptidase	protein_coding	NP_571585.2;XP_005165894.1	ZDB-GENE-000713-1	-3.33742	3.98436	2.9783e-14	5.84236e-13	3.05008	4.66177	311	889	2.35921	6.93064	3.99756	11.0426
58023	NM_131511,NM_131511_dup1	fzd9b	frizzled class receptor 9b	protein_coding	NP_571586.1	ZDB-GENE-000906-4	4.36402	0.317241	2.71226e-07	2.01579e-06	1.54605	0.52363	82	16	0.719828	0.144499	1.14024	0.230229
58028	NM_131516,NM_131516_dup1	pvalb2	parvalbumin 2	protein_coding	NP_571591.1	ZDB-GENE-000322-4	2.53495	6.88161	1.72423e-10	2.10848e-09	7.40957	6.08054	7218	2438	157.237	54.5265	264.731	86.1152
58032	NM_131519	edn1	endothelin 1	protein_coding	NP_571594.1	ZDB-GENE-000920-1	2.33992	1.94744	9.28326e-06	5.01467e-05	2.65892	1.70924	227	83	2.92422	1.08981	4.95494	1.73639
58037	NM_131522,NM_131522_dup1	actn3a	actinin alpha 3a	protein_coding	NP_571597.1	ZDB-GENE-000329-9	3.10377	3.69816	2.44778e-12	3.7684e-11	4.35963	2.86593	834	230	4.04329	1.14134	6.85115	1.81849
58038	NM_131523	stx1b	syntaxin 1B	protein_coding	NP_571598.1	ZDB-GENE-000330-4	2.67116	1.73608	7.69566e-07	5.19624e-06	2.52446	1.47385	203	65	3.61835	1.18016	6.13109	1.88034
58040	NM_131525,XM_005158849,XM_005158850,XM_005158851	sptb	spectrin, beta, erythrocytic	protein_coding	NP_571600.1;XP_005158906.1;XP_005158907.1;XP_005158908.1	ZDB-GENE-000906-1	2.50685	3.52126	1.20434e-08	1.1159e-07	4.11448	2.90859	697	238	1.09797	0.383886	1.86045	0.611644
58042	NM_001115090	tbr1b	T-box, brain, 1b	protein_coding	NP_001108562.1	ZDB-GENE-000323-1	3.19585	0.886051	1.1818e-06	7.64122e-06	1.89388	0.885799	116	31	0.464202	0.1255	0.786566	0.199958
58045	NM_001328159,NM_131530,XM_005172774	hoxc6b	homeobox C6b	protein_coding	NP_001315088.1;NP_571605.2;XP_005172831.1	ZDB-GENE-000822-1	7.34063	-1.74898	0.00118753	0.00392973	0.507414	0.0768272	18	2	0.063018	0.006222	0.106781	0.009913
58052	NM_131537,NM_131537_dup1	hoxb5b	homeobox B5b	protein_coding	NP_571612.2	ZDB-GENE-000823-6	5.04421	-1.05492	0.000538084	0.00193926	0.767654	0.184902	30	5	0.278133	0.043004	0.471281	0.068518
58054	NM_131539	pim2	Pim-2 proto-oncogene, serine/threonine kinase	protein_coding	NP_571614.2	ZDB-GENE-000831-6	-2.13128	4.43512	6.57484e-07	4.49719e-06	3.88678	4.92596	589	1075	3.67354	6.88509	6.22461	10.97
58057	NM_001312866	pou4f1	POU class 4 homeobox 1	protein_coding	NP_001299795.1	ZDB-GENE-000523-2	5.03453	3.00052	1.18235e-19	4.08348e-18	3.83091	1.85814	565	96	3.20024	0.554779	5.42263	0.883928
58065	NM_001115094	notch2	notch 2	protein_coding	NP_001108566.2	ZDB-GENE-000329-4	-3.67742	5.64322	5.59027e-18	1.62628e-16	4.48259	6.31367	912	2872	1.39908	4.52419	2.37066	7.20837
58066	NM_131549	notch3	notch 3	protein_coding	NP_571624.2	ZDB-GENE-000329-5	-6.54077	5.93998	1.21596e-33	1.13165e-31	4.11058	6.74773	695	3893	1.3571	7.81727	2.29953	12.4552
58072	NM_131553,NM_131553_dup1	fzd8b	frizzled class receptor 8b	protein_coding	NP_571628.1	ZDB-GENE-000328-4	7.64239	0.585529	3.60798e-12	5.44381e-11	1.81926	0.409446	108	12	0.662248	0.073695	1.12214	0.117417
58074	NM_131555	dct	dopachrome tautomerase	protein_coding	NP_571630.2	ZDB-GENE-000508-1	3.5431	3.74759	7.39281e-15	1.56589e-13	4.44896	2.78237	890	215	7.37495	1.82362	12.4965	2.90557
58080	NM_131561	axin2	axin 2 (conductin, axil)	protein_coding	NP_571636.1	ZDB-GENE-000403-2	2.07333	2.93157	1.54557e-05	7.98917e-05	3.48667	2.56624	436	180	1.9447	0.823483	3.29519	1.31205
58082	NM_131563,NM_131563_dup1	tnnc2	troponin C type 2 (fast)	protein_coding	NP_571638.1	ZDB-GENE-000322-2	2.25364	5.44261	3.89868e-08	3.32661e-07	5.93445	4.79138	2569	976	27.1346	10.5895	45.9782	16.8722
58092	NM_131571,NM_131571_dup1	smad3a	SMAD family member 3a	protein_coding	NP_571646.1	ZDB-GENE-000509-3	-2.14822	1.71532	9.77812e-05	0.000422567	1.61385	2.44105	88	162	0.505387	0.955345	0.395276	0.813127
58094	NM_131573,XM_017357715	dap1b	death associated protein 1b	protein_coding	NP_571648.1;XP_017213204.1	ZDB-GENE-000511-4	-2.84745	7.75031	6.5013e-13	1.07248e-11	6.81901	8.32039	4779	11652	98.0543	247.013	166.148	393.564
58097	NM_131576	myf5	myogenic factor 5	protein_coding	NP_571651.1	ZDB-GENE-000616-6	-7.77376	0.22705	2.09056e-11	2.89662e-10	0.330654	1.59634	11	74	0.118674	0.827058	0.201087	1.31775
58107	NM_131584	per3	period circadian clock 3	protein_coding	NP_571659.1	ZDB-GENE-000804-1	-2.45123	3.70579	1.6145e-08	1.46686e-07	3.09426	4.28446	322	676	1.05323	2.27168	1.78464	3.61946
58113	NM_131590	cd74a	CD74 molecule, major histocompatibility complex, class II invariant chain a	protein_coding	NP_571665.1	ZDB-GENE-000901-1	-2.46747	9.19593	3.81295e-10	4.43326e-09	8.40622	9.70673	14445	30519	194.715	422.482	329.935	673.138
58114	NM_131591	actc1b	actin, alpha, cardiac muscle 1b	protein_coding	NP_571666.1	ZDB-GENE-000322-1	2.3102	8.72084	6.1729e-09	6.01922e-08	9.20417	7.99934	25146	9320	309.106	117.651	523.763	187.453
58127	NM_131604	runx3	runt-related transcription factor 3	protein_coding	NP_571679.2	ZDB-GENE-000605-2	-2.74659	2.90562	2.56489e-09	2.65097e-08	2.31639	3.57763	170	400	0.435287	1.05519	0.737571	1.68122
58128	NM_131605	fabp7a	fatty acid binding protein 7, brain, a	protein_coding	NP_571680.1	ZDB-GENE-000627-1	2.90798	7.64335	2.45237e-13	4.26639e-12	8.22129	6.69044	12702	3740	285.947	86.4568	484.522	137.751
58137	NM_001328413,NM_131613,XM_005168991,XM_005168994,XM_005168996,XM_005168997,XM_005168998,XM_005168999,XM_009303327,XM_009303328,XM_009303329,XM_009303331,XM_009303332,XM_009303333,XM_009303334,XM_009303335,XM_009303336,XM_009303337,XM_009303338,XM_021477595,XM_021477597,XM_021477598	celf1	cugbp, Elav-like family member 1	protein_coding	NP_001315342.1;NP_571688.1;XP_005169048.1;XP_005169051.1;XP_005169053.1;XP_005169054.1;XP_005169055.1;XP_005169056.1;XP_009301602.1;XP_009301603.1;XP_009301604.1;XP_009301606.1;XP_009301607.1;XP_009301608.1;XP_009301609.1;XP_009301610.1;XP_009301611.1;XP_009301612.1;XP_009301613.1;XP_021333270.1;XP_021333272.1;XP_021333273.1	ZDB-GENE-000501-1	-2.19923	7.60875	4.74111e-08	3.98879e-07	6.94252	8.07313	5210	9811	13.9305	24.7672	23.6045	39.4614
58138	NM_131614,NM_131615,XM_017358962	pbx1a	pre-B-cell leukemia homeobox 1a	protein_coding	NP_571689.1;NP_571690.1;XP_017214451.1	ZDB-GENE-000405-1	2.01526	3.31614	1.48489e-05	7.70014e-05	3.83091	2.91906	565	240	3.49656	1.56196	5.92474	2.48867
58141	NM_131617	gart	phosphoribosylglycinamide formyltransferase	protein_coding	NP_571692.1	ZDB-GENE-000616-14	-2.33506	3.30418	1.85933e-07	1.42416e-06	2.7868	3.88591	252	504	1.19326	2.45009	2.02192	3.90372
58142	NM_001115089,NM_001130666	myhz1.1	myosin, heavy polypeptide 1.1, skeletal muscle	protein_coding	NP_001108561.1;NP_001124138.2	ZDB-GENE-000322-5	4.20563	8.12175	2.84183e-22	1.24785e-20	8.81683	6.75469	19215	3912	49.5185	10.3514	83.9064	16.4929
58143	NM_131619	mylz3	myosin, light polypeptide 3, skeletal muscle	protein_coding	NP_571694.1	ZDB-GENE-000322-6	2.36262	7.17118	3.0782e-09	3.15055e-08	7.66844	6.43765	8645	3133	138.752	51.6362	235.107	82.2717
58146	NM_131622	hey2	hes-related family bHLH transcription factor with YRPW motif 2	protein_coding	NP_571697.2	ZDB-GENE-000526-1	14.7927	1.74009	1.10507e-26	6.71762e-25	2.8302	0.49592	261	15	2.12774	0.118904	3.60534	0.189449
58148	NM_131624	slc34a2a	solute carrier family 34 (type II sodium/phosphate cotransporter), member 2a	protein_coding	NP_571699.1	ZDB-GENE-000524-1	2.06216	3.06273	1.31115e-05	6.87032e-05	3.60523	2.68143	477	198	2.82739	1.20526	4.79086	1.92034
58149	NM_131625,NM_131625_dup1	pdp2	putative pyruvate dehydrogenase phosphatase isoenzyme 2	protein_coding	NP_571700.1	ZDB-GENE-000921-2	-5.92356	-0.912615	2.14197e-05	0.0001076	0.189666	0.885799	6	31	0.047968	0.285172	0.081279	0.454364
58151	NM_131627,NM_131627_dup1	cxcl14	chemokine (C-X-C motif) ligand 14	protein_coding	NP_571702.1	ZDB-GENE-000619-1	-3.93432	6.13274	4.71359e-20	1.71228e-18	4.87911	6.81831	1214	4090	10.8681	37.625	13.9708	10.5684
58215	NM_131631,XM_021468899	fech	ferrochelatase	protein_coding	NP_571706.1;XP_021324574.1	ZDB-GENE-000928-1	-4.02155	-0.116514	5.20702e-06	2.98906e-05	0.434294	1.27626	15	52	0.0613	0.227629	0.103869	0.36268
60635	NM_131637,NM_131637_dup1	cldn7b	claudin 7b	protein_coding	NP_571712.1	ZDB-GENE-001103-5	-2.53879	6.15502	2.08958e-10	2.53461e-09	5.36643	6.68929	1719	3737	13.682	30.5603	23.1834	48.6916
64000	NM_131664	lima1a	LIM domain and actin binding 1a	protein_coding	NP_571739.1	ZDB-GENE-001120-1	-2.16445	6.41682	1.10207e-07	8.74377e-07	5.78071	6.88057	2305	4272	14.3607	27.342	24.3335	43.5639
64265	NM_001278796	aox5	aldehyde oxidase 5	protein_coding	NP_001265725.1	ZDB-GENE-001205-2	2.67725	-0.382614	0.00259342	0.00780251	1.02172	0.467668	44	14	0.168572	0.052731	0.285636	0.084017
64273	NM_131671	atp1b1b	ATPase, Na+/K+ transporting, beta 1b polypeptide	protein_coding	NP_571746.1	ZDB-GENE-001127-4	2.19848	2.7565	3.96211e-06	2.32002e-05	3.35089	2.37413	393	153	2.59309	1.03782	4.39386	1.65355
64279	NM_131676	psmb12	proteasome subunit beta 12	protein_coding	NP_571751.1	ZDB-GENE-001208-1	-11.6695	4.51596	1.20858e-46	2.24956e-44	2.20357	5.43015	154	1540	2.78052	28.7077	4.71145	45.7399
64603	NM_131679,XM_005159319,XM_005159321	eomesa	eomesodermin homolog a	protein_coding	NP_571754.3;XP_005159376.1;XP_005159378.1	ZDB-GENE-001228-1	3.98539	1.21633	1.74998e-09	1.86084e-08	2.20357	0.927884	154	33	0.801124	0.177067	1.35746	0.28212
64605	NM_131681,NR_131978	htatip2	HIV-1 Tat interactive protein 2	protein_coding	NP_571756.1	ZDB-GENE-001219-1	2.61269	3.83765	1.43286e-09	1.54455e-08	4.43184	3.14995	879	288	6.00295	3.66427	10.1717	5.83827
64607	NM_131682,NM_131682_dup1	alas2	aminolevulinate, delta-, synthase 2	protein_coding	NP_571757.1	ZDB-GENE-001229-1	3.53861	2.88714	5.00307e-13	8.40491e-12	3.63544	2.07966	488	118	3.04473	0.752284	4.24123	0.997528
64609	NM_131683,NM_131683_dup1,NM_131683_dup2	atp1a2a	ATPase, Na+/K+ transporting, alpha 2a polypeptide	protein_coding	NP_571758.1	ZDB-GENE-001212-6	2.32289	0.261762	0.00183787	0.00575922	1.37425	0.751635	68	25	0.268545	0.101247	0.455035	0.161316
64614	NM_131688	atp1a1a.3	ATPase, Na+/K+ transporting, alpha 1a polypeptide, tandem duplicate 3	protein_coding	NP_571763.1	ZDB-GENE-001212-3	-2.24672	-0.70159	0.0294307	0.0635997	0.434294	0.84245	15	29	0.068322	0.137321	0.115768	0.218794
64615	NM_131689	atp1a1a.4	ATPase, Na+/K+ transporting, alpha 1a polypeptide, tandem duplicate 4	protein_coding	NP_571764.1	ZDB-GENE-001212-4	5.16165	2.13008	3.13457e-16	7.68409e-15	3.03779	1.25987	308	51	1.47728	0.246846	2.50318	0.393298
64812	NM_131702	sox19b	SRY (sex determining region Y)-box 19b	protein_coding	NP_571777.1	ZDB-GENE-010111-1	-5.00656	2.7621	4.94351e-19	1.61205e-17	1.69955	3.61675	96	412	0.578602	2.55721	0.98041	4.0744
65089	NM_182856	fgf8b	fibroblast growth factor 8 b	protein_coding	NP_878276.1	ZDB-GENE-010122-1	2.13652	0.520845	0.00244589	0.00741487	1.52272	0.906995	80	32	0.53063	0.217266	0.899125	0.346169
65223	NM_131708	try	trypsin	protein_coding	NP_571783.2	ZDB-GENE-010131-7	3.4031	2.98209	1.30231e-12	2.07041e-11	3.7122	2.18753	517	130	9.35967	2.40044	15.8595	3.82461
65231	NM_131716	mdkb	midkine b	protein_coding	NP_571791.1	ZDB-GENE-010131-6	2.12528	8.04509	1.63423e-07	1.2651e-06	8.49242	7.40925	15337	6179	236.357	97.7927	400.495	155.813
65232	NM_131717	six4b	SIX homeobox 4b	protein_coding	NP_571792.2	ZDB-GENE-010201-1	3.59952	-0.175701	0.00011585	0.000493554	1.19403	0.438851	55	13	0.336697	0.080029	0.570515	0.12751
65233	NM_131718	six4a	SIX homeobox 4a	protein_coding	NP_571793.2	ZDB-GENE-010201-2	3.1434	-0.665095	0.00172226	0.00544562	0.900271	0.348776	37	10	0.276789	0.077165	0.469004	0.122947
65235	NM_131720,NM_131720_dup1	six5	SIX homeobox 5	protein_coding	NP_571795.1	ZDB-GENE-010201-3	-6.07403	0.532071	6.97392e-11	8.9386e-10	0.48345	1.77988	17	89	0.101612	0.572351	0.172176	0.911925
79079	NM_131725,XM_009297761	cpeb1a	cytoplasmic polyadenylation element binding protein 1a	protein_coding	NP_571800.1;XP_009296036.1	ZDB-GENE-080723-42	-2.54498	4.73559	7.10984e-10	7.98831e-09	4.00091	5.29297	641	1397	3.905	8.74426	6.61681	13.9322
79376	NM_131730	gfra1a	gdnf family receptor alpha 1a	protein_coding	NP_571805.1	ZDB-GENE-010226-2	2.16736	1.72811	8.35273e-05	0.00036723	2.44603	1.60933	190	75	2.29005	0.920393	3.88037	1.46646
79378	NM_213162	agxtb	alanine-glyoxylate aminotransferase b	protein_coding	NP_998327.1	ZDB-GENE-010302-3	6.69864	0.177685	3.91821e-09	3.95829e-08	1.51092	0.348776	79	10	0.777253	0.099963	1.31701	0.159271
80787	NM_131755	slc6a3	solute carrier family 6 (neurotransmitter transporter), member 3	protein_coding	NP_571830.1	ZDB-GENE-010316-1	2.63221	1.37877	5.47642e-06	3.11987e-05	2.2254	1.25987	157	51	1.35395	0.444283	2.2942	0.707873
80963	NM_199522	rnd3a	Rho family GTPase 3a	protein_coding	NP_955816.1	ZDB-GENE-010319-40	-3.18193	4.37131	9.19993e-14	1.6959e-12	3.44385	5.02016	422	1150	3.21223	8.99606	5.44296	14.3334
81534	NM_001320073,NM_001320073_dup1,NM_001320073_dup2,NM_131758,NM_131758_dup1,NM_131758_dup2,XM_017352833,XM_017352834	stom	stomatin	protein_coding	NP_001307002.1;NP_571833.1	ZDB-GENE-980526-486	2.12021	3.87357	1.62384e-06	1.02258e-05	4.38086	3.37198	847	342	3.436	1.44281	2.54077	2.29883
81540	NM_131760	tyms	thymidylate synthetase	protein_coding	NP_571835.2	ZDB-GENE-040426-59	-2.52146	2.85846	5.28278e-08	4.41098e-07	2.34991	3.50304	175	378	2.1763	4.84416	3.68763	7.71818
81580	NM_131762	cldna	claudin a	protein_coding	NP_571837.2	ZDB-GENE-010328-1	-2.37936	7.79779	2.02446e-09	2.12265e-08	7.05172	8.29599	5623	11456	47.0502	98.4424	79.7241	156.848
81581	NM_131763	cldnb	claudin b	protein_coding	NP_571838.1	ZDB-GENE-010328-2	-2.50297	7.95471	2.31546e-10	2.78929e-09	7.15607	8.47364	6048	12962	82.97	182.611	140.588	290.953
81587	NM_131767	cldnh	claudin h	protein_coding	NP_571842.1	ZDB-GENE-010328-8	2.83331	2.49226	7.11937e-09	6.85631e-08	3.20465	1.96306	351	106	2.91985	0.901803	4.94753	1.43684
81591	NM_131771	cldn15la	claudin 15-like a	protein_coding	NP_571846.2	ZDB-GENE-010328-12	3.12895	1.53289	5.63288e-08	4.67916e-07	2.40197	1.2433	183	50	3.0238	0.839315	5.12367	1.33728
81593	NM_131773	cldn12	claudin 12	protein_coding	NP_571848.1	ZDB-GENE-010328-14	-2.03569	4.31008	3.11994e-06	1.8648e-05	3.81179	4.78424	557	971	2.43222	4.35539	4.12126	6.93942
81885	NM_131778,XR_002455638	meis3	myeloid ecotropic viral integration site 3	protein_coding	NP_571853.1	ZDB-GENE-010406-2	3.19244	1.81196	7.19691e-09	6.91938e-08	2.64278	1.40102	224	60	1.48101	0.402632	2.5095	0.641512
83413	NM_131782,NM_131782_dup1,XM_005169598	glra4a	glycine receptor, alpha 4a	protein_coding	NP_571857.1;XP_005169655.1	ZDB-GENE-010410-3	3.14433	1.97272	4.27006e-09	4.28493e-08	2.77698	1.51585	250	68	1.61441	0.45964	2.30031	0.524324
83415	NM_131783,NM_131783_dup1	six2a	SIX homeobox 2a	protein_coding	NP_571858.1	ZDB-GENE-010412-1	2.28675	0.896792	0.000370007	0.00139519	1.80965	1.06621	107	40	1.02176	0.392446	1.73132	0.625283
83908	NM_199523	ucp1	uncoupling protein 1	protein_coding	NP_955817.1	ZDB-GENE-010503-1	2.45901	3.10925	7.16957e-08	5.86532e-07	3.71991	2.57289	520	181	3.2538	1.16339	5.5134	1.85363
83917	NM_131795	psma6l	proteasome subunit alpha 6, like	protein_coding	NP_571870.2	ZDB-GENE-010502-2	-2.32507	4.45394	3.13879e-08	2.72577e-07	3.82377	4.98196	562	1119	6.58561	13.4779	11.159	21.4744
84037	NM_131797	twsg1a	twisted gastrulation BMP signaling modulator 1a	protein_coding	NP_571872.2	ZDB-GENE-010509-2	-2.75516	3.31155	6.55324e-10	7.38662e-09	2.64818	3.95622	225	531	0.9089	2.20554	1.54008	3.51408
84040	NM_199524,XM_005161114	clic3	chloride intracellular channel 3	protein_coding	NP_955818.1;XP_005161171.1	ZDB-GENE-010507-2	-3.10691	5.20989	5.68821e-14	1.07493e-12	4.24849	5.83173	769	2046	7.89577	21.9955	13.379	35.0453
84702	NM_131802	cp	ceruloplasmin	protein_coding	NP_571877.1	ZDB-GENE-010522-1	3.60544	2.33615	7.48017e-12	1.08804e-10	3.13713	1.66015	333	79	1.5377	0.374768	2.60555	0.597116
84703	NM_198338	slc4a1a	solute carrier family 4 (anion exchanger), member 1a (Diego blood group)	protein_coding	NP_938152.1	ZDB-GENE-010525-1	2.98251	3.17909	7.49549e-11	9.5663e-10	3.85445	2.46269	575	165	2.57322	0.756909	4.36019	1.20598
114367	NM_131804	nots	nothepsin	protein_coding	NP_571879.1	ZDB-GENE-010620-1	5.82578	1.89614	4.986e-17	1.30598e-15	2.85376	1.04724	266	39	4.28915	0.635199	7.26773	1.01206
114401	NM_131807,XM_005162026	bcl2l1	bcl2-like 1	protein_coding	NP_571882.1;XP_005162083.1	ZDB-GENE-010730-1	-2.36462	4.74973	1.19936e-08	1.11227e-07	4.08493	5.27678	682	1381	4.48815	9.43647	7.60493	15.0351
114403	NM_131809	gja8b	gap junction protein alpha 8 paralog b	protein_coding	NP_571884.2	ZDB-GENE-010607-3	2.63099	1.40562	4.62034e-06	2.67639e-05	2.24691	1.27626	160	52	1.0457	0.350588	1.77189	0.55859
114404	NM_131810,NM_131810_dup1,XM_005166218,XM_021476749	cx44.2	connexin 44.2	protein_coding	NP_571885.2;XP_005166275.1;XP_021332424.1	ZDB-GENE-010619-1	-16.3887	5.99007	6.68205e-63	2.26683e-60	3.05415	6.91629	312	4380	2.37593	34.6458	4.02589	55.201
114405	NM_131811	cx27.5	connexin 27.5	protein_coding	NP_571886.1	ZDB-GENE-010619-2	-2.57	0.547515	0.000185746	0.000752173	0.844921	1.60933	34	75	0.382605	0.859522	0.648304	1.36947
114407	NM_131813	angpt1	angiopoietin 1	protein_coding	NP_571888.1	ZDB-GENE-010817-1	6.38332	-0.792383	1.76491e-05	9.02317e-05	0.918259	0.184902	38	5	0.361898	0.042457	0.613218	0.067647
114414	NM_131816,XM_017353799	neurod6a	neuronal differentiation 6a	protein_coding	NP_571891.3;XP_017209288.1	ZDB-GENE-010608-1	2.78312	0.549106	7.53536e-05	0.000334652	1.61385	0.797757	88	27	0.492493	0.154974	0.834504	0.246919
114415	NM_001309843,NM_001309844,NM_131817,NR_132274	neurod6b	neuronal differentiation 6b	protein_coding	NP_001296772.1;NP_001296773.1;NP_571892.3	ZDB-GENE-010608-2	2.01127	0.547411	0.00556546	0.0153178	1.52272	0.948475	80	34	0.750297	0.309324	1.27134	0.492844
114417	NM_194361,NM_194361_dup1,NM_194361_dup2,XM_017357587,XM_017357591,XM_017357594	mpz	myelin protein zero	protein_coding	NP_919342.1	ZDB-GENE-010724-4	-5.30913	5.17898	9.07467e-27	5.56465e-25	3.64087	5.9526	490	2228	2.5602	15.4946	1.91705	13.3863
114418	NM_173231	crybb1	crystallin, beta B1	protein_coding	NP_775338.2	ZDB-GENE-010813-1	-10.6048	10.1	5.88181e-52	1.28867e-49	7.57089	10.9707	8077	73343	134.087	1250.37	227.203	1992.22
114421	NM_131818,XM_021476750,XM_021476751	angptl3	angiopoietin-like 3	protein_coding	NP_571893.2;XP_021332425.1;XP_021332426.1	ZDB-GENE-010817-3	16.8838	3.15572	1.91637e-43	2.9857e-41	4.14345	0.988796	712	36	3.64467	0.145954	6.17571	0.232548
114424	NM_131820	cdh1	cadherin 1, type 1, E-cadherin (epithelial)	protein_coding	NP_571895.1	ZDB-GENE-010606-1	-3.71891	7.87626	4.47039e-19	1.4623e-17	6.65202	8.53641	4252	13540	20.0022	65.4201	33.8927	104.233
114425	NM_131709,NM_131709_dup1,XM_021480009	zeb1b	zinc finger E-box binding homeobox 1b	protein_coding	NP_571784.1	ZDB-GENE-010621-1	2.81599	4.7905	1.05258e-11	1.50502e-10	5.38353	3.95113	1740	529	4.48717	1.50822	3.43035	2.13753
114430	NM_131823	irx1b	iroquois homeobox 1b	protein_coding	NP_571898.1	ZDB-GENE-010716-1	2.62739	0.438204	0.0002523	0.00098728	1.52272	0.77488	80	26	0.704677	0.230548	1.19404	0.367332
114432	NM_200020	btg1	B-cell translocation gene 1, anti-proliferative	protein_coding	NP_956314.1	ZDB-GENE-010726-1	-2.84098	7.08298	8.65944e-13	1.41189e-11	6.16144	7.65475	3014	7332	32.0311	80.0437	54.275	127.533
114435	NM_131082	neurod2	neurogenic differentiation 2	protein_coding	NP_571157.1	ZDB-GENE-010608-3	3.70986	1.71987	1.94605e-10	2.36734e-09	2.60441	1.2433	217	50	2.16052	0.513104	3.66089	0.817526
114440	NM_131829	zp2.6	zona pellucida glycoprotein 2, tandem duplicate 6	protein_coding	NP_571904.2	ZDB-GENE-090306-2	2.02864	0.0766231	0.0123053	0.0303419	1.22327	0.728009	57	24	0.643498	0.280039	1.09037	0.446185
114444	NM_131832	etv6	ets variant 6	protein_coding	NP_571907.2	ZDB-GENE-010727-1	-2.92541	1.40992	3.59094e-07	2.59548e-06	1.22327	2.29595	57	143	2.96555	7.68016	5.02497	12.2368
114452	NM_001144803,XM_021476915	blzf1	basic leucine zipper nuclear factor 1	protein_coding	NP_001138275.1;XP_021332590.1	ZDB-GENE-010724-1	-2.00233	4.89957	3.39895e-06	2.01656e-05	4.38248	5.34922	848	1454	4.53117	7.88446	7.67783	12.5623
114461	NM_131840	tnfrsfa	tumor necrosis factor receptor superfamily, member a	protein_coding	NP_571915.2	ZDB-GENE-010802-1	-2.61179	2.76614	2.36366e-08	2.08623e-07	2.24691	3.4317	160	358	1.27346	2.94173	2.15782	4.68705
114467	NM_131844,XM_017351895,XM_021467572	mafa	v-maf avian musculoaponeurotic fibrosarcoma oncogene homolog a (paralog a)	protein_coding	NP_571919.2;XP_017207384.1;XP_021323247.1	ZDB-GENE-010605-2	2.54153	0.930698	7.0476e-05	0.000314919	1.86635	1.02802	113	38	0.574045	0.197041	0.972688	0.313944
114551	NM_201289,XM_021466597	pklr	pyruvate kinase, liver and RBC	protein_coding	NP_958446.1;XP_021322272.1	ZDB-GENE-010907-1	8.23097	3.81786	1.54006e-33	1.42696e-31	4.70094	2.01279	1068	111	9.04327	0.961465	15.3233	1.5319
114834	NM_131848,XM_005166704,XM_005166705	tfe3a	transcription factor binding to IGHM enhancer 3a	protein_coding	NP_571923.2;XP_005166761.1;XP_005166762.1	ZDB-GENE-010919-2	-2.77783	1.90789	1.12995e-07	8.95823e-07	1.569	2.69368	84	200	0.536264	1.26696	0.908671	2.01864
116993	NM_001326557,XM_021475988	vcana	versican a	protein_coding	NP_001313486.1;XP_021331663.1	ZDB-GENE-011023-1	3.08884	-0.0579151	0.000282516	0.00109412	1.23767	0.52363	58	16	0.031565	0.008807	0.053485	0.014032
117508	NM_131856,NM_131856_dup1,NM_131856_dup2	klf2a	Kruppel-like factor 2a	protein_coding	NP_571931.2	ZDB-GENE-011109-1	-6.91864	6.03517	1.93029e-35	1.95191e-33	4.13386	6.85251	707	4189	5.07483	30.9048	7.35088	47.9837
117509	NM_131857,XM_005163607	klf2b	Kruppel-like factor 2b	protein_coding	NP_571932.1;XP_005163664.1	ZDB-GENE-011109-2	-5.90285	5.18587	1.2114e-29	8.9716e-28	3.52826	5.98223	450	2275	1.92682	9.94684	3.26489	15.8483
117603	NM_131859,NM_131859_dup1,XM_017356404	klf3	Kruppel-like factor 3 (basic)	protein_coding	NP_571934.3	ZDB-GENE-011116-1	-3.20021	4.23417	1.03396e-13	1.89767e-12	3.31399	4.88915	382	1047	1.8177	5.09004	3.08	8.10994
118437	NM_131860	gpc4	glypican 4	protein_coding	NP_571935.2	ZDB-GENE-011119-1	-2.78053	2.35807	1.30911e-08	1.20554e-07	1.88476	3.08633	115	274	0.97223	2.38331	1.64739	3.79732
140423	NM_131863	jag1b	jagged 1b	protein_coding	NP_571938.2	ZDB-GENE-011128-4	-4.36713	6.0378	1.04882e-22	4.7852e-21	4.67075	6.75323	1045	3908	2.3963	9.203	4.06041	14.6631
140430	NM_131870	guca1a	guanylate cyclase activator 1A	protein_coding	NP_571945.1	ZDB-GENE-011128-5	2.27829	5.30271	2.84776e-08	2.48329e-07	5.80146	4.6461	2339	879	23.3411	9.00539	39.5503	14.3482
140616	NM_131875	sox10	SRY (sex determining region Y)-box 10	protein_coding	NP_571950.1	ZDB-GENE-011207-1	2.43152	3.73342	2.20762e-08	1.95507e-07	4.30427	3.12303	801	282	3.87405	1.3984	6.56438	2.22806
140619	NM_131876	admp	anti-dorsalizing morphogenic protein	protein_coding	NP_571951.2	ZDB-GENE-011214-1	2.3719	2.70539	5.70476e-07	3.96524e-06	3.33423	2.27164	388	140	3.22333	1.19079	5.46177	1.89727
140621	NM_131877,NM_131877_dup1	casp3a	caspase 3, apoptosis-related cysteine peptidase a	protein_coding	NP_571952.1	ZDB-GENE-011210-1	-3.01435	4.74803	4.98664e-13	8.38402e-12	3.84508	5.36845	571	1474	3.0279	8.03408	5.13061	12.8007
140622	NM_001082796	atic	5-aminoimidazole-4-carboxamide ribonucleotide formyltransferase/IMP cyclohydrolase	protein_coding	NP_001076265.2	ZDB-GENE-011212-4	-2.99131	4.02241	3.48681e-12	5.26854e-11	3.18992	4.66177	347	889	2.74484	7.21581	4.65099	11.4969
140815	NM_131885	cebpa	CCAAT/enhancer binding protein (C/EBP), alpha	protein_coding	NP_571960.1	ZDB-GENE-020111-2	-2.25075	4.16094	1.41698e-07	1.11e-06	3.58285	4.68496	469	904	2.52104	4.99125	4.27177	7.95254
140817	NM_131887	cebpd	CCAAT/enhancer binding protein (C/EBP), delta	protein_coding	NP_571962.1	ZDB-GENE-020111-4	-2.51861	6.65127	2.39421e-10	2.86937e-09	5.86079	7.17842	2439	5260	31.1581	69.0315	52.7958	109.988
140819	NM_001311348,XM_021476760,XM_021476761,XM_021476762,XM_021476763,XM_021476764,XM_021476765,XM_021476766,XM_021476767,XM_021476768,XM_021476769,XM_021476770,XM_021476771,XM_021476772,XM_021476773	ptprfa	protein tyrosine phosphatase, receptor type, f, a	protein_coding	NP_001298277.1;XP_021332435.1;XP_021332436.1;XP_021332437.1;XP_021332438.1;XP_021332439.1;XP_021332440.1;XP_021332441.1;XP_021332442.1;XP_021332443.1;XP_021332444.1;XP_021332445.1;XP_021332446.1;XP_021332447.1;XP_021332448.1	ZDB-GENE-020107-2	2.22587	6.26423	4.17331e-08	3.54369e-07	6.74125	5.60327	4526	1741	8.23246	3.2483	13.9495	5.17551
142987	NM_152977,NM_178163	dmbx1a	diencephalon/mesencephalon homeobox 1a	protein_coding	NP_694509.1;NP_835457.2	ZDB-GENE-020117-1	2.42586	2.58904	4.30514e-07	3.06326e-06	3.23726	2.16131	360	127	3.97538	1.42782	6.73608	2.27493
170450	NM_131894,NM_131894_dup1,NM_131894_dup2,XM_005170896,XM_005170897,XM_005170898	gria2a	glutamate receptor, ionotropic, AMPA 2a	protein_coding	NP_571969.1;XP_005170953.1;XP_005170954.1;XP_005170955.1	ZDB-GENE-020125-3	3.17152	5.2803	2.2251e-14	4.44028e-13	5.90657	4.29253	2519	680	9.03504	2.47618	12.136	3.19144
170451	NM_131895,NM_131895_dup1,XM_005157304,XM_005157305,XM_005157306,XR_222234,XR_658188,XR_658190	gria2b	glutamate receptor, ionotropic, AMPA 2b	protein_coding	NP_571970.2	ZDB-GENE-020125-4	2.20194	5.95467	7.06929e-08	5.7923e-07	6.42984	5.31097	3639	1415	8.86479	3.42003	15.0209	5.44912
170457	NM_001159970	s1pr2	sphingosine-1-phosphate receptor 2	protein_coding	NP_001153442.1	ZDB-GENE-020123-2	-2.62656	2.97257	9.34822e-09	8.82897e-08	2.40835	3.62317	184	414	1.20096	2.77596	2.03496	4.42293
170581	NM_131900,XM_009300335,XM_021474904,XM_021474905,XM_021474906,XM_021474907,XM_021474908,XM_021474909,XM_021474910,XM_021474911,XM_021474912,XM_021474913,XM_021474914,XM_021474915,XM_021474916,XM_021474917,XM_021474918,XM_021474919,XM_021474920,XM_021474921,XM_021474922	cacna1c	calcium channel, voltage-dependent, L type, alpha 1C subunit	protein_coding	NP_571975.1;XP_009298610.1;XP_021330579.1;XP_021330580.1;XP_021330581.1;XP_021330582.1;XP_021330583.1;XP_021330584.1;XP_021330585.1;XP_021330586.1;XP_021330587.1;XP_021330588.1;XP_021330589.1;XP_021330590.1;XP_021330591.1;XP_021330592.1;XP_021330593.1;XP_021330594.1;XP_021330595.1;XP_021330596.1;XP_021330597.1	ZDB-GENE-020129-1	2.80215	5.84863	3.29748e-12	5.00043e-11	6.42355	4.9669	3623	1107	4.30291	1.34901	7.29105	2.14937
171094	NM_139077,NM_139077_dup1	nek8	NIMA-related kinase 8	protein_coding	NP_620776.1	ZDB-GENE-020509-1	-2.03798	-0.155916	0.0187995	0.0434611	0.643394	1.10341	24	42	0.127961	0.237999	0.0662	0.243643
171465	NM_001136488,NM_001136488_dup1,NM_152958,NM_152958_dup1,XM_005162144	phc2a	polyhomeotic homolog 2a (Drosophila)	protein_coding	NP_001129960.1;NP_694490.2	ZDB-GENE-020312-1	-2.65465	5.61181	4.20112e-11	5.5749e-10	4.79399	6.16983	1142	2596	7.581	14.5503	10.1732	9.10031
171473	NM_199481,NM_199481_dup1,XM_021480960	ccng1	cyclin G1	protein_coding	NP_955775.1	ZDB-GENE-020322-1	-2.78324	7.87611	1.88859e-12	2.95555e-11	6.96784	8.43723	5303	12638	42.3124	103.593	71.6961	165.054
171477	NM_199528	rbp5	retinol binding protein 1a, cellular	protein_coding	NP_955822.2	ZDB-GENE-020320-1	2.1281	5.0941	4.19429e-07	2.99147e-06	5.56646	4.51073	1981	797	24.2718	10.0277	41.1273	15.977
171480	NM_182859	crabp2a	cellular retinoic acid binding protein 2, a	protein_coding	NP_878279.1	ZDB-GENE-020320-4	-2.62685	4.60691	2.38068e-10	2.85804e-09	3.84977	5.17997	573	1289	3.53352	8.16797	5.98736	13.014
171481	NM_152960	fabp10a	fatty acid binding protein 10a, liver basic	protein_coding	NP_694492.1	ZDB-GENE-020318-1	2.05394	2.28292	6.73854e-05	0.000302458	2.89975	2.05138	276	115	9.68431	4.12002	16.4096	6.56442
192323	NM_212567	mcm3	minichromosome maintenance complex component 3	protein_coding	NP_997732.2	ZDB-GENE-020419-4	-2.30009	3.18258	3.58674e-07	2.59332e-06	2.69588	3.76632	234	461	1.21569	2.4586	2.05993	3.91728
195815	NM_152971,XM_005158167,XM_005158168	lmna	lamin A	protein_coding	NP_694503.1;XP_005158224.1;XP_005158225.1	ZDB-GENE-020424-3	-2.01159	6.47118	1.44995e-06	9.22189e-06	5.90431	6.90052	2515	4332	8.10873	14.5754	13.7398	23.223
195817	NM_152973,XM_021469720	lmnl3	lamin L3	protein_coding	NP_694505.2;XP_021325395.1	ZDB-GENE-020424-4	2.79363	1.66968	4.42556e-07	3.14257e-06	2.48276	1.40102	196	60	1.41682	0.443066	2.40072	0.705936
195824	NM_173265	atp6ap1b	ATPase, H+ transporting, lysosomal accessory protein 1b	protein_coding	NP_775372.2	ZDB-GENE-020423-2	-2.26038	3.95402	1.69418e-07	1.30862e-06	3.39008	4.48805	405	784	2.67416	5.31469	4.53122	8.46787
245949	NM_153674	vangl2	VANGL planar cell polarity protein 2	protein_coding	NP_705960.1	ZDB-GENE-020507-3	-6.34577	2.73442	4.22632e-23	2.0317e-21	1.48701	3.63909	77	419	0.568517	3.17126	0.963323	5.05276
245950	NM_212570	ptk2bb	protein tyrosine kinase 2 beta, b	protein_coding	NP_997735.1	ZDB-GENE-020507-1	-3.29288	4.11888	4.06269e-14	7.86556e-13	3.18249	4.7871	345	973	1.43823	4.17696	2.437	6.65513
246090	NM_152952	cygb1	cytoglobin 1	protein_coding	NP_694484.1	ZDB-GENE-020513-1	-3.49173	5.72769	5.69644e-17	1.48836e-15	4.61945	6.38102	1007	3011	2.98705	9.17746	5.06141	14.6224
246092	NM_199271	cpa5	carboxypeptidase A5	protein_coding	NP_954965.1	ZDB-GENE-020514-1	4.80542	1.70204	1.28442e-13	2.3269e-12	2.64818	1.06621	225	40	2.5781	0.471061	4.36846	0.750539
246093	NM_152967	id3	inhibitor of DNA binding 3	protein_coding	NP_694499.1	ZDB-GENE-020515-1	2.63777	4.58476	2.2427e-10	2.71096e-09	5.15799	3.82318	1482	481	19.5191	6.49863	33.0741	10.3542
246095	NM_144764	gpib	glucose-6-phosphate isomerase b	protein_coding	NP_658910.2	ZDB-GENE-020513-3	2.64824	1.89146	5.70383e-07	3.96524e-06	2.65356	1.58323	226	73	1.82199	0.60351	3.08726	0.961569
246222	NM_001328433,XM_021478599	tbx15	T-box 15	protein_coding	NP_001315362.1;XP_021334274.1	ZDB-GENE-020529-1	2.22024	1.23516	0.000213827	0.000853889	2.05702	1.27626	135	52	0.683403	0.269	1.15799	0.428596
246275	NM_152982,XM_005171786	myhz2	myosin, heavy polypeptide 2, fast muscle specific	protein_coding	NP_694514.2;XP_005171843.1	ZDB-GENE-020604-1	3.34725	6.12277	4.07166e-16	9.84358e-15	6.75758	5.04547	4578	1171	11.7178	3.07781	19.8551	4.90386
252846	NM_152983,XM_021467573	myo7aa	myosin VIIAa	protein_coding	NP_694515.1;XP_021323248.1	ZDB-GENE-020709-1	2.22402	4.91117	1.01212e-07	8.06359e-07	5.40681	4.29455	1769	681	3.44999	1.36295	5.84583	2.17159
252850	NM_173226	thbs4b	thrombospondin 4b	protein_coding	NP_775333.1	ZDB-GENE-020708-4	4.02708	4.27756	1.90662e-18	5.84575e-17	4.99805	3.11849	1322	281	6.04359	1.31858	10.2406	2.10088
259196	NM_152976,NM_152976_dup1,XM_005161701	malt2	MALT paracaspase 2	protein_coding	NP_694508.1	ZDB-GENE-020801-2	-3.03411	3.32886	1.6248e-11	2.27375e-10	2.57636	4.00619	212	551	1.15412	2.97574	1.95559	3.32115
259250	NM_153670,XM_021469300	cers4a	ceramide synthase 4a	protein_coding	NP_705956.1;XP_021324975.1	ZDB-GENE-020808-1	-2.46199	3.04003	6.65074e-08	5.46426e-07	2.51858	3.66109	202	426	1.66982	3.64353	2.82942	5.80521
259251	NM_153671	cers2a	ceramide synthase 2a	protein_coding	NP_705957.1	ZDB-GENE-020808-2	-4.88204	1.88126	7.53147e-15	1.59205e-13	1.1642	2.82197	53	222	0.414042	1.81058	0.701573	2.88478
259260	NM_152980	mst1	macrophage stimulating 1	protein_coding	NP_694512.1	ZDB-GENE-020806-3	2.54841	2.19553	5.15045e-07	3.61098e-06	2.90427	1.82512	277	93	1.7615	0.608432	2.98477	0.969412
259303	NM_152884	caspb	caspase b	protein_coding	NP_690840.2	ZDB-GENE-020812-1	-3.43585	6.27072	8.19899e-17	2.10818e-15	5.16177	6.91367	1486	4372	12.8066	38.6923	21.7002	61.6483
259304	NM_153672,NM_153672_dup1	twsg1b	twisted gastrulation BMP signaling modulator 1b	protein_coding	NP_705958.1	ZDB-GENE-020812-3	2.79857	-0.338272	0.00241842	0.00734432	1.05462	0.467668	46	14	1.12436	0.328409	1.90517	0.523253
259306	NM_152954	cyp2ad2	cytochrome P450, family 2, subfamily AD, polypeptide 2	protein_coding	NP_694486.1	ZDB-GENE-020812-2	11.7415	1.12705	2.73198e-19	9.07767e-18	2.289	0.409446	166	12	1.35508	0.09531	2.29612	0.151857
260303	NM_001246276	reln	reelin	protein_coding	NP_001233205.1	ZDB-GENE-020822-1	2.54264	5.32666	4.07186e-10	4.71864e-09	5.87064	4.56174	2456	827	5.02513	1.73636	8.51481	2.76654
260407	NM_152248,NM_152248_dup1,NM_152986,NM_152986_dup1,NM_152987,NM_152987_dup1	tp63	tumor protein p63	protein_coding	NP_689454.1;NP_694518.1;NP_694519.1	ZDB-GENE-030819-1	-7.39121	6.30954	9.07881e-38	1.0492e-35	4.3145	7.13641	807	5108	4.30233	28.2978	7.24656	43.7946
260440	NM_001007029	atp2a1	ATPase, Ca++ transporting, cardiac muscle, fast twitch 1	protein_coding	NP_001007030.1	ZDB-GENE-020905-1	3.24028	6.63429	1.54161e-15	3.52442e-14	7.25471	5.57954	6479	1712	33.6719	9.13783	57.0553	14.5593
266753	NM_153643,XM_009296804,XM_021469722,XM_021469723,XM_021469724	acvrl1	activin A receptor type II-like 1	protein_coding	NP_705929.1;XP_009295079.1;XP_021325397.1;XP_021325398.1;XP_021325399.1	ZDB-GENE-021003-1	4.4915	4.37366	4.7166e-21	1.86474e-19	5.12061	3.09097	1443	275	8.34569	1.6062	14.1413	2.55915
266754	NM_194364	adra2da	adrenergic, alpha-2D-, receptor a	protein_coding	NP_919345.2	ZDB-GENE-021010-4	-3.54297	0.209898	8.25474e-06	4.52258e-05	0.577005	1.45957	21	64	0.111421	0.360293	0.188797	0.574053
266962	NM_170761	jmjd6	jumonji domain containing 6	protein_coding	NP_739567.3	ZDB-GENE-040426-17	-2.1549	2.27542	1.85562e-05	9.43417e-05	2.01584	2.91906	130	240	0.564859	1.07211	0.957124	1.70819
266987	NM_001014345	cbsb	cystathionine-beta-synthase b	protein_coding	NP_001014367.2	ZDB-GENE-021030-3	-2.14359	6.30825	1.62337e-07	1.25854e-06	5.68349	6.76851	2152	3950	11.751	22.1511	19.9114	35.2932
280650	NM_201461	klf6a	Kruppel-like factor 6a	protein_coding	NP_958869.2	ZDB-GENE-021115-9	-2.18719	6.16287	8.12809e-08	6.61091e-07	5.52157	6.63356	1919	3594	8.84173	17.0139	14.9818	27.1081
282554	NM_183067,NM_183067_dup1,XM_005162673,XM_021470111	drd3	dopamine receptor D3	protein_coding	NP_898890.1	ZDB-GENE-021119-1	-5.52688	2.15883	4.55278e-18	1.33369e-16	1.23767	3.09097	58	275	0.402876	2.03919	0.39301	1.7443
282672	NM_213132,NM_213132_dup1	fbp1b	fructose-1,6-bisphosphatase 1b	protein_coding	NP_998297.1	ZDB-GENE-021206-11	3.14252	-0.318761	0.000418716	0.00155516	1.08678	0.438851	48	13	0.545426	0.145597	0.824755	0.231979
286739	NM_001004296,NM_001004296_dup1,XM_009301281,XM_009301282	msna	moesin a	protein_coding	NP_001004296.1;XP_009299556.1;XP_009299557.1	ZDB-GENE-021211-2	-3.15936	6.7717	5.01122e-15	1.08104e-13	5.7421	7.38325	2243	6068	9.77436	27.1815	16.5621	43.3081
286830	NM_173275	lamb1a	laminin, beta 1a	protein_coding	NP_775382.1	ZDB-GENE-021226-1	4.4955	3.20902	4.3669e-18	1.2846e-16	4.00091	2.11652	641	122	1.85194	0.360827	3.13801	0.574905
286831	NM_173276	lamb4	laminin, beta 4	protein_coding	NP_775383.1	ZDB-GENE-021226-2	-4.82573	3.1865	7.24259e-20	2.59512e-18	2.04069	4.00373	133	550	0.34638	1.47408	0.586923	2.34864
317643	NM_173287	chrnb3b	cholinergic receptor, nicotinic, beta 3b (neuronal)	protein_coding	NP_775394.1	ZDB-GENE-030102-4	7.12654	3.64779	1.96594e-29	1.44579e-27	4.51398	2.02254	933	112	10.4019	1.2726	17.6254	2.02762
317731	XM_021479070	ttn.2	titin, tandem duplicate 2	protein_coding	XP_021334745.1	ZDB-GENE-030113-2	2.03239	3.94163	5.25412e-06	3.01117e-05	4.42714	3.47137	876	369	0.143135	0.061888	0.242536	0.098606
317736	NM_001005390	alkbh6	alkB homolog 6	protein_coding	NP_001005390.1	ZDB-GENE-060407-1	-2.544	2.41917	1.48749e-07	1.15875e-06	1.99904	3.10938	128	279	1.37087	3.0734	2.32287	4.89684
317737	NM_212576,NM_212576_dup1	glud1a	glutamate dehydrogenase 1a	protein_coding	NP_997741.1	ZDB-GENE-030114-2	-2.04261	4.92723	1.71811e-06	1.07551e-05	4.39056	5.38554	853	1492	5.31567	9.55721	9.00712	15.2275
317741	NM_201295	coro1ca	coronin, actin binding protein, 1Ca	protein_coding	NP_958452.1	ZDB-GENE-030114-6	-3.19416	5.17108	1.61456e-14	3.29061e-13	4.18304	5.80304	733	2005	5.3076	14.915	8.99345	23.7641
317743	NM_001115114	gapdh	glyceraldehyde-3-phosphate dehydrogenase	protein_coding	NP_001108586.1	ZDB-GENE-030115-1	2.87066	6.70952	6.32276e-13	1.04467e-11	7.28665	5.7824	6625	1976	78.9273	24.1667	133.738	38.5047
317746	XM_001923786,XM_021472462,XM_021479771	suclg2	succinate-CoA ligase, GDP-forming, beta subunit, transcript variant X2	protein_coding	XP_021328137.1	ZDB-GENE-030114-3	2.32704	5.54954	1.07725e-08	1.00746e-07	6.05368	4.86363	2794	1028	18.9187	7.13745	32.0567	11.3721
321031	NM_001004109	quo	quattro	protein_coding	NP_001004109.1	ZDB-GENE-030131-9944	-2.68719	4.86456	6.27859e-11	8.09672e-10	4.06891	5.44018	674	1551	1.61566	3.82074	2.73764	6.08757
321035	NM_201296,NM_201296_dup1,XM_021467109	pabpc4	poly(A) binding protein, cytoplasmic 4 (inducible form)	protein_coding	NP_958453.1;XP_021322784.1	ZDB-GENE-030131-9663	-8.29027	5.95495	7.14413e-41	9.82108e-39	3.84273	6.80319	570	4047	3.60244	26.0092	2.78873	35.3373
321053	NM_001100137	mybphb	myosin binding protein Hb	protein_coding	NP_001093607.1	ZDB-GENE-030131-9794	2.82258	4.84639	8.90157e-12	1.2815e-10	5.4391	4.00127	1810	549	16.179	5.03332	27.4145	8.01956
321056	NM_198871	zgc:63569	zgc:63569	protein_coding	NP_942572.1	ZDB-GENE-030131-9816	-13.7268	3.77183	4.25978e-46	7.72379e-44	1.51092	4.7243	79	930	0.609126	7.38863	1.03213	11.7723
321064	NM_198979	klhl41b	kelch-like family member 41b	protein_coding	NP_945330.1	ZDB-GENE-030131-9875	2.47046	1.39451	1.74593e-05	8.93482e-05	2.21816	1.30847	156	54	1.05876	0.370554	1.79401	0.590402
321065	XM_002663395,XM_005167775,XM_005167776,XM_005167777,XM_009304787,XM_021478986,XM_021478987	tbc1d4	TBC1 domain family, member 4, transcript variant X7	protein_coding	XP_002663441.2;XP_005167832.1;XP_005167833.1;XP_005167834.1;XP_009303062.1;XP_021334661.1;XP_021334662.1	ZDB-GENE-030131-9881	-2.26763	4.04676	1.33402e-07	1.04852e-06	3.47152	4.57835	431	837	1.18953	2.4023	2.0156	3.82758
321084	NM_001020476,XM_005166992,XM_005166993,XM_005166994,XM_005166996	dnmt3ba	DNA (cytosine-5-)-methyltransferase 3 beta, duplicate a	protein_coding	NP_001018312.2;XP_005167049.1;XP_005167050.1;XP_005167051.1;XP_005167053.1	ZDB-GENE-050314-4	3.89688	3.66286	1.52721e-16	3.81495e-15	4.39538	2.61857	856	188	2.2283	0.648711	3.77573	1.03359
321177	XM_003199845	si:ch211-153b23.5	si:ch211-153b23.5	protein_coding	XP_003199893.1	ZDB-GENE-030131-9744	3.36131	5.64532	5.31814e-16	1.2711e-14	6.28616	4.58	3290	838	52.0399	13.6033	88.1789	21.6741
321191	XM_002663185	sb:cb288	sb:cb288	protein_coding	XP_002663231.1	ZDB-GENE-030131-9760	2.06965	1.11214	0.000998205	0.00335924	1.93863	1.2433	121	50	1.09049	0.459929	1.84778	0.732803
321195	NM_001013259	serpina1l	serine (or cysteine) proteinase inhibitor, clade A (alpha-1 antiproteinase, antitrypsin), member 1, like	protein_coding	NP_001013277.3	ZDB-GENE-040721-3	3.12551	1.74113	1.96855e-08	1.75965e-07	2.57636	1.37082	212	58	1.97715	0.551872	3.35017	0.879296
321243	NM_001039171,NM_001039171_dup1,XM_009296659,XM_009296660	lama5	laminin, alpha 5	protein_coding	NP_001034260.1;XP_009294934.1;XP_009294935.1	ZDB-GENE-030131-9823	-12.3666	6.93936	1.53763e-55	4.14627e-53	4.27491	7.83334	784	8303	3.05311	23.2467	0.86219	11.8698
321245	NM_205540	smyd1a	SET and MYND domain containing 1a	protein_coding	NP_991103.2	ZDB-GENE-030131-9825	2.37262	3.2582	1.44003e-07	1.12595e-06	3.84508	2.72981	571	206	5.66922	2.09613	9.6062	3.33975
321264	NM_213241	sp8a	sp8 transcription factor a	protein_coding	NP_998406.2	ZDB-GENE-030131-9849	-23.7054	1.24537	1.4003e-27	9.00686e-26	0.247725	2.46269	8	165	0.047738	1.10486	0.080889	1.76038
321298	XM_009292161,XM_009292162,XM_009292163,XM_009292164,XM_021466878,XM_021466879,XM_021466880	col14a1a	collagen, type XIV, alpha 1a, transcript variant X4	protein_coding	XP_009290436.1;XP_009290437.1;XP_009290438.1;XP_009290439.1;XP_021322553.1;XP_021322554.1;XP_021322555.1	ZDB-GENE-030131-9889	2.23899	3.91044	2.58375e-07	1.93129e-06	4.43964	3.35665	884	338	1.65954	0.679565	2.812	1.08275
321314	NM_198874	lmbr1l	limb development membrane protein 1-like	protein_coding	NP_942575.1	ZDB-GENE-030131-9906	-2.42024	2.45523	5.72276e-07	3.97644e-06	2.06511	3.12303	136	282	0.887607	1.90009	1.504	3.0274
321315	NM_201465	calr3b	calreticulin 3b	protein_coding	NP_958873.3	ZDB-GENE-030131-9907	-2.35823	4.17983	2.66201e-08	2.33389e-07	3.55725	4.72281	460	929	2.4378	5.0637	4.13073	8.06797
321324	NM_212583,NM_212583_dup1	slc39a1	solute carrier family 39 (zinc transporter), member 1	protein_coding	NP_997748.2	ZDB-GENE-030131-9917	-5.14151	1.88794	1.28326e-15	2.95951e-14	1.13373	2.83861	51	225	0.4134	1.89247	0.635522	3.01527
321390	NM_001305467,XM_017351596,XM_021467111	mipol1	mirror-image polydactyly 1	protein_coding	NP_001292396.1;XP_017207085.1;XP_021322786.1	ZDB-GENE-030131-41	-2.69797	2.24984	5.83998e-08	4.84546e-07	1.8288	2.98034	109	252	0.728552	1.76518	1.23449	2.81246
321452	NM_199542,NM_199542_dup1	smc2	structural maintenance of chromosomes 2	protein_coding	NP_955836.2	ZDB-GENE-030131-105	-3.20447	2.59473	5.89341e-11	7.63747e-10	1.94742	3.34505	122	335	0.462691	1.306	0.784005	2.08084
321502	NM_001199952,XM_021469301	krt96	keratin 96	protein_coding	NP_001186881.1;XP_021324976.1	ZDB-GENE-030131-221	-6.05584	8.01323	7.95944e-33	7.09369e-31	6.21381	8.79587	3127	16215	39.5555	214.81	67.0248	342.255
321541	NM_212588,XM_005155625	slc20a1b	solute carrier family 20 (phosphate transporter), member 1b	protein_coding	NP_997753.1;XP_005155682.1	ZDB-GENE-030131-260	-2.24737	8.7602	1.83395e-08	1.64914e-07	8.0662	9.23145	11403	21943	44.0808	87.3855	74.6926	139.231
321552	NM_001020507,NM_001020507_dup1,XM_005162920	smyhc1	slow myosin heavy chain 1	protein_coding	NP_001018343.1	ZDB-GENE-030131-271	4.22714	3.70221	2.6187e-18	7.91366e-17	4.45513	2.57289	894	181	2.30848	0.476884	2.07354	0.434744
321619	NM_001082829,NM_001082829_dup1,NM_001082829_dup2,XM_005166177	atad5b	ATPase family, AAA domain containing 5b	protein_coding	NP_001076298.2;XP_005166234.1	ZDB-GENE-030131-338	-2.0694	0.565311	0.00379978	0.0109271	0.953575	1.55665	40	71	0.151514	0.281892	0.184587	0.328348
321657	NR_134972	si:dkey-188h10.3	si:dkey-188h10.3	lncRNA	.	ZDB-GENE-030131-376	-11.0486	-0.704813	2.97612e-08	2.59092e-07	0.129173	1.04724	4	39	0.077387	0.800959	0.131127	1.27616
321837	NM_182864	keap1a	kelch-like ECH-associated protein 1a	protein_coding	NP_878284.2	ZDB-GENE-030131-556	-2.59132	4.67577	3.58886e-10	4.1866e-09	3.92732	5.24175	607	1347	3.27751	7.46851	5.55356	11.8995
321928	NM_199577	phgdh	phosphoglycerate dehydrogenase	protein_coding	NP_955871.2	ZDB-GENE-030131-647	-2.40974	5.61769	2.47247e-09	2.56428e-08	4.89623	6.13657	1229	2536	8.00882	16.9758	13.5705	27.0475
321932	NM_001045281	hfe2	hemochromatosis type 2	protein_coding	NP_001038746.1	ZDB-GENE-030131-651	5.47951	-0.731218	3.27027e-05	0.000157652	0.936025	0.2192	39	6	0.347443	0.049554	0.588724	0.078954
322008	NM_207049	kctd5a	potassium channel tetramerization domain containing 5a	protein_coding	NP_996932.1	ZDB-GENE-030131-727	-2.40965	3.49761	4.34684e-08	3.67324e-07	2.92666	4.08036	282	582	2.40186	5.09824	4.06982	8.123
322012	NM_199580,NM_199580_dup1,XM_021480967	hmmr	hyaluronan-mediated motility receptor (RHAMM)	protein_coding	NP_955874.2	ZDB-GENE-030131-731	2.19568	4.34642	2.93295e-07	2.16832e-06	4.85129	3.77499	1190	464	5.55171	2.21452	3.54222	3.09989
322073	NM_212607,XM_017358985	ubxn1	UBX domain protein 1	protein_coding	NP_997772.1;XP_017214474.1	ZDB-GENE-030131-792	-7.04813	6.79974	3.30782e-37	3.70071e-35	4.8419	7.61545	1182	7134	15.2412	93.8122	25.8254	149.47
322121	NM_001089323	abhd17aa	abhydrolase domain containing 17Aa	protein_coding	NP_001082792.1	ZDB-GENE-030131-840	-2.77221	1.44996	9.70859e-07	6.39927e-06	1.28002	2.31193	61	145	0.604724	1.47868	1.02467	2.35597
322221	NM_199586,XM_021481334,XM_021481335,XM_021481336,XM_021481337,XM_021481338,XM_021481339	actn4	actinin, alpha 4	protein_coding	NP_955880.1;XP_021337009.1;XP_021337010.1;XP_021337011.1;XP_021337012.1;XP_021337013.1;XP_021337014.1	ZDB-GENE-030131-940	-2.20942	8.75308	3.55818e-08	3.05591e-07	8.076	9.21674	11481	21720	35.994	70.0002	60.9899	111.531
322309	NM_199596,XM_009291476,XM_009291477,XM_009291478	sirt2	sirtuin 2 (silent mating type information regulation 2, homolog) 2 (S. cerevisiae)	protein_coding	NP_955890.1;XP_009289751.1;XP_009289752.1;XP_009289753.1	ZDB-GENE-030131-1028	-2.63537	6.13999	4.13178e-11	5.48635e-10	5.3139	6.68929	1656	3737	10.4244	23.5716	17.6635	37.5565
322372	NM_199601,XM_021477397,XM_021477398	fah	fumarylacetoacetate hydrolase (fumarylacetoacetase)	protein_coding	NP_955895.1;XP_021333072.1;XP_021333073.1	ZDB-GENE-030131-1091	8.04044	2.18235	2.79213e-23	1.36574e-21	3.15999	0.988796	339	36	2.04171	0.22002	3.45957	0.350557
322379	XM_003199274	wu:fb59d01	wu:fb59d01	protein_coding	XP_003199322.1	ZDB-GENE-030131-1098	2.40305	2.55682	6.19098e-07	4.26934e-06	3.20465	2.14356	351	125	4.27115	1.5589	7.23724	2.48379
322451	NM_212618,NM_212618_dup1	ctrb1	chymotrypsinogen B1	protein_coding	NP_997783.1	ZDB-GENE-030131-1171	2.72514	1.32939	3.82488e-06	2.25157e-05	2.19621	1.20958	153	48	2.78361	0.887537	4.71668	1.41411
322453	NM_199605	prss59.1	protease, serine, 59, tandem duplicate 1	protein_coding	NP_955899.2	ZDB-GENE-030131-1173	3.40138	1.56609	5.75286e-09	5.63839e-08	2.45222	1.20958	191	48	3.47917	0.883226	5.89527	1.40724
322468	NM_001316326,XM_009307025	chs1	chitin synthase 1	protein_coding	NP_001303255.1;XP_009305300.1	ZDB-GENE-030131-1188	6.73966	-0.494109	1.18844e-06	7.67707e-06	1.08678	0.2192	48	6	0.157838	0.017816	0.267449	0.028387
322473	NM_199606	lpar5a	lysophosphatidic acid receptor 5a	protein_coding	NP_955900.1	ZDB-GENE-030131-1193	2.09966	0.108913	0.00788991	0.0206635	1.25192	0.728009	59	24	0.580913	0.241494	0.984327	0.384771
322481	NM_199607	cel.1	carboxyl ester lipase, tandem duplicate 1	protein_coding	NP_955901.1	ZDB-GENE-030131-1201	27.5221	0.364083	2.10153e-17	5.77044e-16	1.74057	0.113759	100	3	0.86609	0.025057	1.46754	0.039923
322507	XM_002661186	wu:fb63c12	wu:fb63c12	protein_coding	XP_002661232.1	ZDB-GENE-030131-1227	2.77258	0.133467	0.000329839	0.00125839	1.33462	0.629436	65	20	0.499058	0.156102	0.845628	0.248717
322510	XM_002663831	si:ch73-106k19.5	si:ch73-106k19.5	protein_coding	XP_002663877.1	ZDB-GENE-030131-1230	2.20116	0.263413	0.00483422	0.013512	1.36116	0.77488	67	26	0.765643	0.293705	1.29734	0.467959
322533	NM_001089325	anpepb	alanyl (membrane) aminopeptidase b	protein_coding	NP_001082794.1	ZDB-GENE-030131-1253	14.8606	0.482852	7.36057e-16	1.73949e-14	1.79998	0.2192	106	6	0.501501	0.027951	0.849766	0.044534
322604	NM_001007151,NM_001007151_dup1	shbg	sex hormone-binding globulin	protein_coding	NP_001007152.1	ZDB-GENE-030131-1324	3.51928	-1.20421	0.00903825	0.0233025	0.664862	0.2192	25	6	0.243978	0.05529	0.413408	0.088094
322609	NM_212625	st6galnac3	ST6 (alpha-N-acetyl-neuraminyl-2,3-beta-galactosyl-1,3)-N-acetylgalactosaminide alpha-2,6-sialyltransferase 3	protein_coding	NP_997790.1	ZDB-GENE-030131-1329	2.8048	-0.77948	0.00660661	0.0177626	0.825989	0.348776	33	10	0.311772	0.089718	0.528281	0.142947
322691	NM_201472	plg	plasminogen	protein_coding	NP_958880.2	ZDB-GENE-030131-1411	3.80887	0.248525	3.38021e-06	2.00836e-05	1.47491	0.550818	76	17	0.368274	0.080826	0.624021	0.12878
322701	NM_001077758,XM_017352438	serpina1	serpin peptidase inhibitor, clade A (alpha-1 antiproteinase, antitrypsin), member 1	protein_coding	NP_001071226.1;XP_017207927.1	ZDB-GENE-030131-1421	2.17182	1.78564	6.80502e-05	0.000305247	2.4948	1.64761	198	78	1.80156	0.731795	3.05265	1.16597
322720	NM_001305471	itpkcb	inositol-trisphosphate 3-kinase Cb	protein_coding	NP_001292400.1	ZDB-GENE-080225-27	-4.55174	6.03458	8.21953e-24	4.1558e-22	4.62082	6.76089	1008	3929	3.75008	15.019	6.35432	23.9296
322780	NM_206829,NM_206829_dup1	nansa	N-acetylneuraminic acid synthase a	protein_coding	NP_996660.1	ZDB-GENE-030131-1500	-2.11488	4.72679	6.41029e-07	4.39751e-06	4.16809	5.20586	725	1313	8.43112	15.6887	14.2861	24.9967
322921	XM_005169847,XM_005169848,XM_005169849,XM_005169850,XM_005169852,XM_017351774,XM_021467329	wu:fb77a09	wu:fb77a09, transcript variant X7	protein_coding	XP_005169904.1;XP_005169905.1;XP_005169906.1;XP_005169907.1;XP_005169909.1;XP_017207263.1;XP_021323004.1	ZDB-GENE-030131-1641	-2.17962	2.8151	4.17038e-06	2.43114e-05	2.43358	3.40588	188	351	0.489404	0.983848	0.82927	1.56756
323197	NM_199631,XM_005162298	racgap1	Rac GTPase activating protein 1	protein_coding	NP_955925.1;XP_005162355.1	ZDB-GENE-030131-1917	-2.8385	0.841338	7.42418e-06	4.10928e-05	0.936025	1.84722	39	95	0.268758	0.679877	0.455397	1.08324
323285	NM_178131,NM_178131_dup1	scinla	scinderin like a	protein_coding	NP_835232.2	ZDB-GENE-030131-2005	-4.54136	10.4459	1.52768e-24	8.19685e-23	8.97846	11.1594	21498	83596	123.233	492.112	205.626	761.516
323301	XM_009306370,XM_009306371,XM_009306372,XM_009306374,XM_009306375,XR_002459730,XR_662993	abcc3	ATP-binding cassette, sub-family C (CFTR/MRP), member 3, transcript variant X3	protein_coding	XP_009304645.1;XP_009304646.1;XP_009304647.1;XP_009304649.1;XP_009304650.1	ZDB-GENE-050517-16	2.61057	6.07811	6.80841e-11	8.73712e-10	6.62352	5.26246	4168	1367	9.95629	3.29752	16.8704	5.25392
323320	NM_205544,XM_021477400	actn3b	actinin alpha 3b	protein_coding	NP_991107.2;XP_021333075.1	ZDB-GENE-030131-2040	2.57736	3.76761	2.78686e-09	2.86491e-08	4.35963	3.1002	834	277	2.69712	0.918676	4.57013	1.46372
323364	NM_001099228,NM_001099228_dup1	cd248a	CD248 molecule, endosialin a	protein_coding	NP_001092698.3	ZDB-GENE-030131-2084	7.33931	2.74454	2.38218e-25	1.33969e-23	3.66238	1.37082	498	58	2.49711	0.294242	4.23123	0.468814
323406	NM_001012366,XM_005172254	krcp	kelch repeat-containing protein	protein_coding	NP_001012366.1;XP_005172311.1	ZDB-GENE-030131-2126	-2.58439	1.74563	1.21937e-06	7.86478e-06	1.51092	2.53254	79	175	0.463892	1.06708	0.78604	1.70018
323452	NM_199640	metap2b	methionyl aminopeptidase 2b	protein_coding	NP_955934.1	ZDB-GENE-030131-2172	-2.10441	5.31742	4.73953e-07	3.33958e-06	4.73686	5.78168	1096	1975	6.9984	12.9576	11.8584	20.6454
323473	NM_199515	prdm1a	PR domain containing 1a, with ZNF domain	protein_coding	NP_955809.2	ZDB-GENE-030131-2193	3.59909	3.62515	5.5242e-15	1.18804e-13	4.3364	2.66286	820	195	3.45024	0.839461	5.84624	1.33751
323509	NM_198805,NM_198805_dup1	gnaia	guanine nucleotide binding protein (G protein), alpha inhibiting activity polypeptide a	protein_coding	NP_942100.1	ZDB-GENE-030131-2229	-2.10054	4.21919	1.32593e-06	8.48825e-06	3.69925	4.71081	512	921	2.0947	3.97688	3.54935	5.68069
323630	NM_212648	dvl2	dishevelled segment polarity protein 2	protein_coding	NP_997813.1	ZDB-GENE-041118-20	-5.94141	3.13902	7.2587e-24	3.67885e-22	1.81926	4.00373	108	550	0.643155	3.37344	1.08979	5.3749
323641	NM_001020478	gpr182	G protein-coupled receptor 182	protein_coding	NP_001018314.1	ZDB-GENE-030131-2361	3.611	0.774355	2.68966e-07	2.00254e-06	1.83828	0.77488	110	26	1.16661	0.282592	1.97676	0.450253
323681	NM_001130587,XM_005170905,XM_009307741	tmem154	transmembrane protein 154	protein_coding	NP_001124059.1;XP_005170962.1;XP_009306016.1	ZDB-GENE-030131-2401	-2.9216	4.47623	3.16011e-12	4.80597e-11	3.62453	5.09248	484	1211	2.29445	5.88821	3.88783	9.38166
323695	NM_001024162,NM_212651	cav1	caveolin 1	protein_coding	NP_001019333.1;NP_997816.1	ZDB-GENE-030131-2415	-2.2733	2.72069	1.49346e-06	9.47284e-06	2.32315	3.33727	171	333	1.50971	3.16048	2.55813	5.03558
323696	NM_001004667,NM_001004667_dup1	f11r.1	F11 receptor, tandem duplicate 1	protein_coding	NP_001004667.1	ZDB-GENE-030131-2416	-2.40286	4.99234	4.98587e-09	4.93495e-08	4.29913	5.52059	798	1642	8.8745	18.7518	7.88511	24.5656
323834	NM_001039620,NM_001039620_dup1	dusp23a	dual specificity phosphatase 23a	protein_coding	NP_001034709.1	ZDB-GENE-030131-2554	-5.4841	1.96548	7.02659e-17	1.82008e-15	1.13373	2.91906	51	240	0.692149	3.3975	1.17281	5.41322
324010	NM_205546	hnf4b	hepatic nuclear factor 4, beta	protein_coding	NP_991109.1	ZDB-GENE-030131-2730	7.73283	-1.21316	0.000165623	0.000679056	0.727412	0.113759	28	3	0.301897	0.022404	0.511549	0.035696
324023	XM_001919866,XM_005171104	dspa	desmoplakin a, transcript variant X2	protein_coding	XP_001919901.3;XP_005171161.1	ZDB-GENE-030131-2743	-9.28699	9.32588	3.53841e-47	6.70482e-45	6.97457	10.1795	5328	42369	10.424	85.8629	17.6629	136.805
324116	NM_001114884	zgc:174696	zgc:174696	protein_coding	NP_001108356.2	ZDB-GENE-030131-2836	-2.10493	0.226166	0.00526908	0.0145745	0.787362	1.33999	31	56	0.253323	0.469598	0.429242	0.748209
324137	NM_212663	cd82b	CD82 molecule b	protein_coding	NP_997828.1	ZDB-GENE-030131-2857	-3.95169	6.65941	2.3217e-20	8.69963e-19	5.38596	7.34251	1743	5898	9.03052	31.3865	15.3017	50.008
324188	NM_212666	cyp26b1	cytochrome P450, family 26, subfamily b, polypeptide 1	protein_coding	NP_997831.1	ZDB-GENE-030131-2908	2.5571	2.13654	4.85668e-07	3.41526e-06	2.85376	1.77988	266	89	1.23879	0.42578	2.09907	0.678393
324205	XM_005160267,XM_005160268,XM_005160269	wu:fc21g02	wu:fc21g02, transcript variant X1	protein_coding	XP_005160324.1;XP_005160325.1;XP_005160326.1	ZDB-GENE-030131-2925	2.0924	5.05388	7.3559e-07	4.99408e-06	5.51936	4.48805	1916	784	8.15834	3.29217	13.8239	5.2454
324211	NM_212668	namptb	nicotinamide phosphoribosyltransferase b	protein_coding	NP_997833.2	ZDB-GENE-030131-2931	-3.1841	4.22486	1.28184e-13	2.32422e-12	3.31059	4.87846	381	1039	2.90943	8.15846	4.92987	12.9988
324212	NM_001199969	cyp2aa6	cytochrome P450, family 2, subfamily AA, polypeptide 6	protein_coding	NP_001186898.2	ZDB-GENE-030131-2932	4.55718	3.88968	2.32454e-20	8.69963e-19	4.65474	2.65661	1033	194	8.81394	1.69975	14.9348	2.70821
324254	NM_001077211,NM_001077211_dup1	mtor	mechanistic target of rapamycin (serine/threonine kinase)	protein_coding	NP_001070679.2	ZDB-GENE-030131-2974	-2.01267	4.12049	5.37881e-06	3.07608e-05	3.64628	4.5964	492	848	1.57865	2.79406	2.27573	1.90633
324332	XM_009297585,XM_009297586,XM_009297587,XM_009297588,XM_017353885	agap3	ArfGAP with GTPase domain, ankyrin repeat and PH domain 3, transcript variant X2	protein_coding	XP_009295860.1;XP_009295861.1;XP_009295862.1;XP_009295863.1;XP_017209374.1	ZDB-GENE-110927-1	-4.38847	2.34501	4.3582e-15	9.45987e-14	1.52272	3.2066	80	301	0.18001	0.661992	0.305018	1.05475
324358	XM_005174119,XR_002456555	si:ch211-200e2.1	si:ch211-200e2.1, transcript variant X2	protein_coding	XP_005174176.1	ZDB-GENE-030131-3078	-3.15813	2.41737	2.32778e-10	2.80253e-09	1.8288	3.18073	109	295	0.674184	1.88667	1.14237	3.00602
324373	NM_212677,NM_212677_dup1	dnajc4	DnaJ (Hsp40) homolog, subfamily C, member 4	protein_coding	NP_997842.1	ZDB-GENE-030131-3093	-2.21968	4.03549	2.61032e-07	1.94899e-06	3.48063	4.5584	434	825	2.83836	5.54146	3.89176	2.79512
324610	XM_021476836,XM_021476837,XM_021476839,XM_021476842,XM_021476843,XM_021476844,XM_021476846,XM_021476851,XM_021476854,XR_002459000	wu:fc34e06	wu:fc34e06, transcript variant X10	protein_coding	XP_021332511.1;XP_021332512.1;XP_021332514.1;XP_021332517.1;XP_021332518.1;XP_021332519.1;XP_021332521.1;XP_021332526.1;XP_021332529.1	ZDB-GENE-030131-3331	-10.1013	7.31284	1.3274e-49	2.76429e-47	4.8894	8.18147	1223	10579	2.0954	18.1048	3.55054	28.8463
324689	NM_199693	arl11	ADP-ribosylation factor-like 11	protein_coding	NP_955987.1	ZDB-GENE-030131-3410	3.14111	0.569482	1.08685e-05	5.7814e-05	1.65733	0.751635	92	25	0.750431	0.207756	1.27157	0.331017
324723	NM_212687	irf2bpl	interferon regulatory factor 2 binding protein-like	protein_coding	NP_997852.1	ZDB-GENE-040426-1968	2.10827	4.60998	8.08828e-07	5.43343e-06	5.0892	4.05922	1411	573	7.81106	3.2562	13.2354	5.18809
324743	NM_199694,XM_021470452	snupn	snurportin 1	protein_coding	NP_955988.1;XP_021326127.1	ZDB-GENE-030131-3464	-2.01156	4.4529	4.11084e-06	2.39776e-05	3.9559	4.91684	620	1068	6.44219	11.4198	10.9159	18.195
324906	NR_120315	wu:fc47e11	wu:fc47e11	lncRNA	.	ZDB-GENE-030131-3629	-2.17754	3.53714	1.06111e-06	6.91824e-06	3.05008	4.07569	311	580	7.78307	14.9404	13.188	23.8044
324910	NM_001114885,NM_001328508	sema7a	semaphorin 7A	protein_coding	NP_001108357.2;NP_001315437.1	ZDB-GENE-030131-3633	4.25	-0.101981	1.12694e-05	5.97354e-05	1.26604	0.409446	60	12	0.356725	0.073492	0.604451	0.117095
324942	NM_001305567,XM_001923728,XM_017351597,XM_021467117	grhl1	grainyhead-like transcription factor 1	protein_coding	NP_001292496.1;XP_001923763.1;XP_017207086.1;XP_021322792.1	ZDB-GENE-030131-3665	-3.27786	6.13555	1.10274e-15	2.56287e-14	5.08124	6.76416	1403	3938	5.00707	14.5646	8.48421	23.2058
324950	NM_001123045,XM_021480978	tspan17	tetraspanin 17	protein_coding	NP_001116517.1;XP_021336653.1	ZDB-GENE-030131-3673	-2.68072	2.47325	2.6781e-08	2.34702e-07	1.99904	3.17637	128	294	0.350315	0.829694	0.59359	1.32195
325179	NM_001039804	inppl1a	inositol polyphosphate phosphatase-like 1a	protein_coding	NP_001034893.1	ZDB-GENE-030131-3904	-2.74523	3.88452	1.65327e-10	2.02523e-09	3.14861	4.49856	336	790	1.48077	3.57676	2.50909	5.69883
325221	NM_199707	ell	elongation factor RNA polymerase II	protein_coding	NP_956001.1	ZDB-GENE-030131-3946	-2.09265	5.24051	6.00239e-07	4.14881e-06	4.66809	5.70358	1043	1869	4.17057	7.67945	7.06681	12.2356
325276	NM_001082996	cfap45	cilia and flagella associated protein 45	protein_coding	NP_001076465.2	ZDB-GENE-070209-143	2.02524	0.236165	0.0102955	0.0260239	1.32116	0.797757	64	27	0.525636	0.224489	0.890663	0.357677
325361	NM_199715	chp1	calcineurin-like EF-hand protein 1	protein_coding	NP_956009.1	ZDB-GENE-030131-4086	-3.21355	2.93207	9.08349e-12	1.30505e-10	2.20357	3.65484	154	424	1.562	4.41016	2.64672	7.02669
325401	NR_120354,NR_120354_dup1,NR_120355,NR_120355_dup1	si:dkeyp-80d11.1	si:dkeyp-80d11.1	lncRNA	.	ZDB-GENE-030131-4126	2.13698	0.684291	0.00152558	0.00490186	1.63575	0.988796	90	36	0.789951	0.319019	1.20485	0.472583
325449	NM_001161470	kif20a	kinesin family member 20A	protein_coding	NP_001154942.1	ZDB-GENE-050522-252	-2.49889	2.03337	1.09241e-06	7.1069e-06	1.73042	2.76506	99	212	0.429165	0.944291	0.727198	1.50453
325751	NM_001089331,XM_005170655,XM_017354055	chchd3b	coiled-coil-helix-coiled-coil-helix domain containing 3b	protein_coding	NP_001082800.1;XP_005170712.1;XP_017209544.1	ZDB-GENE-030131-4476	15.4966	2.82742	7.12898e-39	9.08751e-37	3.82615	0.885799	563	31	3.79311	0.191718	6.42722	0.305464
325758	NM_001326482	si:ch211-105c13.3	si:ch211-105c13.3	protein_coding	NP_001313411.1	ZDB-GENE-030131-4483	-3.22912	7.77995	1.11909e-15	2.598e-14	6.71319	8.39484	4438	12271	32.3933	91.9766	54.8887	146.546
325875	NM_199730,XR_001796551	dgat1a	diacylglycerol O-acyltransferase 1a	protein_coding	NP_956024.1	ZDB-GENE-030131-4600	2.56803	3.64509	4.15016e-09	4.16859e-08	4.24136	2.99526	765	255	4.37506	1.5586	7.41331	2.48331
325896	XM_009299338,XM_009299339,XM_009299340,XM_009299341	cnp	2',3'-cyclic nucleotide 3' phosphodiesterase, transcript variant X2	protein_coding	XP_009297613.1;XP_009297614.1;XP_009297615.1;XP_009297616.1	ZDB-GENE-030521-29	-2.08627	6.52473	4.04545e-07	2.90007e-06	5.92225	6.97078	2547	4550	13.391	24.5078	22.6903	39.0482
325975	XM_002663821,XM_009306259,XM_021472501	slc41a1	solute carrier family 41 (magnesium transporter), member 1, transcript variant X1	protein_coding	XP_021328176.1	ZDB-GENE-030131-4700	-2.14458	1.34716	0.000241759	0.000950096	1.37425	2.14356	68	125	0.233407	0.443024	0.395496	0.705869
326020	XM_017352544,XM_021468555	si:dkey-121j17.5	si:dkey-121j17.5, transcript variant X2	protein_coding	XP_017208033.2;XP_021324230.1	ZDB-GENE-030131-4745	2.50814	-0.187139	0.00337687	0.00986331	1.11825	0.550818	50	17	0.252205	0.086505	0.427348	0.137828
326030	NM_199736	slc6a19b	solute carrier family 6 (neutral amino acid transporter), member 19b	protein_coding	NP_956030.1	ZDB-GENE-030131-4755	2.09966	0.108913	0.00788991	0.0206635	1.25192	0.728009	59	24	0.357848	0.145339	0.606355	0.231568
326062	XM_009291845,XM_009291846,XM_009291847,XM_009291848	si:dkey-23k10.5	si:dkey-23k10.5, transcript variant X3	protein_coding	XP_009290120.1;XP_009290121.1;XP_009290122.1;XP_009290123.1	ZDB-GENE-030131-4787	-2.22055	2.87847	2.21936e-06	1.36093e-05	2.47062	3.47137	194	369	0.930747	1.82627	1.5771	2.90979
326102	NM_001080012,NM_001080012_dup1,NM_001080012_dup2	hhip	hedgehog interacting protein	protein_coding	NP_001073481.1	ZDB-GENE-030131-4827	-2.36085	2.82405	4.41812e-07	3.1393e-06	2.37617	3.44625	179	362	0.603876	1.25567	0.492088	0.292891
326281	XM_001340280,XM_002665557,XM_002665561,XM_002665562,XM_005170079,XM_005170080,XM_005170081,XM_005170082,XM_021468312	mbpa	myelin basic protein a, transcript variant X9	protein_coding	XP_001340316.2;XP_002665603.1;XP_002665607.1;XP_002665608.1;XP_005170136.1;XP_005170137.1;XP_005170138.1;XP_005170139.1;XP_021323987.1	ZDB-GENE-030128-2	-9.65502	8.71407	1.88867e-48	3.78329e-46	6.31869	9.57372	3366	27828	27.975	239.944	47.4022	382.302
326287	NM_175084	epb41b	erythrocyte membrane protein band 4.1b	protein_coding	NP_778259.1	ZDB-GENE-030130-1	2.13766	3.03113	4.85722e-06	2.8028e-05	3.59128	2.62498	472	189	1.44983	0.596727	2.45666	0.950763
326634	NM_001020519,XM_021476011	slc14a2	solute carrier family 14 (urea transporter), member 2	protein_coding	NP_001018355.1;XP_021331686.1	ZDB-GENE-030131-4833	-2.14327	-0.427673	0.020365	0.0465432	0.530986	0.968776	19	35	0.099058	0.188713	0.167849	0.300675
326672	NM_001023580	ets2	v-ets avian erythroblastosis virus E26 oncogene homolog 2	protein_coding	NP_001018874.1	ZDB-GENE-050522-552	-2.78542	5.76715	4.30364e-12	6.44259e-11	4.89509	6.34167	1228	2929	9.34014	22.8895	15.8264	36.4698
326825	NM_001012243,XM_021480028	gna13a	guanine nucleotide binding protein (G protein), alpha 13a	protein_coding	NP_001012243.2;XP_021335703.1	ZDB-GENE-030131-5024	-2.54944	2.76786	5.1551e-08	4.31981e-07	2.26811	3.42437	163	356	1.05058	2.35678	1.78015	3.75505
326845	NM_001348086,XM_021474933	slco1d1	solute carrier organic anion transporter family, member 1D1	protein_coding	NP_001335015.1;XP_021330608.1	ZDB-GENE-030131-5044	3.58785	1.84267	2.43337e-10	2.91298e-09	2.70109	1.33999	235	56	1.14097	0.276826	1.93331	0.441065
326887	NM_200557,XM_005170172	gopc	golgi-associated PDZ and coiled-coil motif containing	protein_coding	NP_956851.1;XP_005170229.1	ZDB-GENE-030131-5086	-2.52546	2.72251	7.51821e-08	6.13147e-07	2.23978	3.37958	159	344	1.13388	2.53004	1.92131	4.0311
326931	NM_199753	cnn3a	calponin 3, acidic a	protein_coding	NP_956047.1	ZDB-GENE-030131-5130	-2.45603	6.45288	7.49091e-10	8.39853e-09	5.69136	6.97109	2164	4551	17.0211	36.7617	28.8414	58.5723
327067	NM_214702,NM_214702_dup1	slc25a4	solute carrier family 25 (mitochondrial carrier; adenine nucleotide translocator), member 4	protein_coding	NP_999867.1	ZDB-GENE-030131-5275	3.97614	3.81709	2.50593e-17	6.80093e-16	4.54904	2.72981	957	206	10.4663	2.30638	6.59702	2.2983
327096	NM_212701,XM_005170214,XM_009295014	hlx1	H2.0-like homeo box 1 (Drosophila)	protein_coding	NP_997866.1;XP_005170271.1;XP_009293289.1	ZDB-GENE-030131-5304	3.23288	3.49116	9.73597e-13	1.57158e-11	4.17558	2.65034	729	193	6.68668	1.70062	11.3302	2.7096
327154	NM_200507	fam46c	family with sequence similarity 46, member C	protein_coding	NP_956801.2	ZDB-GENE-030131-5365	-15.3319	2.70985	1.13747e-38	1.41564e-36	0.844921	3.72813	34	448	0.294124	3.99977	0.498378	6.37281
327162	NM_001102617	tmem51b	transmembrane protein 51b	protein_coding	NP_001096087.1	ZDB-GENE-030131-5373	-4.60277	1.94062	1.83576e-14	3.70553e-13	1.23767	2.8605	58	229	0.64193	2.63565	1.08772	4.19937
327172	NM_198808,XM_021478992	stap2a	signal transducing adaptor family member 2a	protein_coding	NP_942103.1;XP_021334667.1	ZDB-GENE-030131-5383	2.15506	3.30777	2.30304e-06	1.40772e-05	3.85211	2.85506	574	228	3.40836	1.51923	5.77529	2.42058
327175	XM_001920867,XM_021469267,XM_021469268,XM_021469269	larp1	La ribonucleoprotein domain family, member 1, transcript variant X3	protein_coding	XP_001920902.3;XP_021324942.1;XP_021324943.1;XP_021324944.1	ZDB-GENE-030131-5386	-2.92737	6.87959	2.19042e-13	3.83607e-12	5.92947	7.46346	2560	6417	11.6009	28.5803	19.6571	45.5369
327179	XM_002666402	top1	topoisomerase (DNA) I	protein_coding	XP_002666448.2	ZDB-GENE-030131-5390	-2.08102	0.911705	0.00133355	0.00434725	1.13373	1.80268	51	91	0.271255	0.500738	0.459627	0.797824
327198	NM_001327787,NR_137174,XM_005164196,XM_005164197,XM_005164198,XM_017353425,XR_223324,XR_223325	micall2a	mical-like 2a	protein_coding	NP_001314716.1;XP_005164253.1;XP_005164254.1;XP_005164255.1;XP_017208914.1	ZDB-GENE-030131-5409	2.82142	1.423	9.52003e-07	6.28681e-06	2.28207	1.2433	165	50	0.674083	0.209287	1.1422	0.333457
327268	NM_199777,XM_017356444	sec23b	Sec23 homolog B, COPII coat complex component	protein_coding	NP_956071.1;XP_017211933.1	ZDB-GENE-030131-5479	-3.00971	6.09668	8.5408e-14	1.58551e-12	5.13414	6.69616	1457	3755	7.19676	17.7574	12.1945	28.2928
327288	NM_214704,XM_005170004,XM_021467997	cndp2	carnosine dipeptidase 2	protein_coding	NP_999869.2;XP_005170061.1;XP_021323672.1	ZDB-GENE-030131-5499	-2.69499	5.46051	2.44096e-11	3.34685e-10	4.63313	6.02648	1017	2347	7.31393	17.424	12.3931	27.7616
327320	NM_001328531	f5	coagulation factor V	protein_coding	NP_001315460.1	ZDB-GENE-030131-5531	-2.30546	5.11099	2.14702e-08	1.90864e-07	4.45205	5.61941	892	1761	2.15935	4.378	3.65891	6.97544
327325	NM_199786	clec14a	C-type lectin domain containing 14A	protein_coding	NP_956080.1	ZDB-GENE-030131-5536	20.6587	3.89955	5.00022e-55	1.28256e-52	4.87336	1.2433	1209	50	10.8607	0.453998	18.4029	0.723354
327328	NM_199788	fam212ab	family with sequence similarity 212, member Ab	protein_coding	NP_956082.1	ZDB-GENE-030131-5539	-2.54815	2.32842	2.04978e-07	1.56286e-06	1.92979	3.02948	120	262	1.68412	3.76827	2.85366	6.00397
327364	XM_021468721,XM_021468722	wu:fi04e12	wu:fi04e12, transcript variant X2	protein_coding	XP_021324396.1;XP_021324397.1	ZDB-GENE-030131-5575	-8.39161	8.79636	1.32547e-43	2.09614e-41	6.58005	9.63569	4043	29051	7.77941	57.405	13.1818	91.4631
327429	NM_199804	cntn5	contactin 5	protein_coding	NP_956098.1	ZDB-GENE-030131-5640	2.60692	4.13172	8.12625e-10	9.06734e-09	4.71387	3.417	1078	354	4.00404	1.34916	6.78463	2.14961
327462	NM_199809,NM_199809_dup1,NM_199809_dup2,XM_009299518,XM_009299519,XM_017353437	hsd3b7	hydroxy-delta-5-steroid dehydrogenase, 3 beta- and steroid delta-isomerase	protein_coding	NP_956103.1	ZDB-GENE-030131-5673	-3.45503	3.94681	7.05481e-15	1.50034e-13	2.9833	4.63661	295	873	2.57367	7.85441	2.98112	5.89964
327497	NM_199814,XM_017356818	zgc:66473	zgc:66473	protein_coding	NP_956108.1;XP_017212307.1	ZDB-GENE-030131-5708	-2.77738	4.45176	3.09287e-11	4.18343e-10	3.65166	5.05024	494	1175	3.58814	8.78198	6.07991	13.9923
327507	XR_660079	tgds	TDP-glucose 4,6-dehydratase	misc_RNA	.	ZDB-GENE-030131-5718	-2.16936	-0.217649	0.0113003	0.0281411	0.599476	1.08493	22	41	1.15694	2.25352	1.96037	3.59051
327541	NM_198875	zgc:66479	zgc:66479	protein_coding	NP_942576.2	ZDB-GENE-031030-10	2.41962	1.73976	9.19513e-06	4.97175e-05	2.4948	1.54318	198	70	1.28828	0.467822	2.18293	0.745379
327556	NM_001320439,XM_005173347	porb	P450 (cytochrome) oxidoreductase b	protein_coding	NP_001307368.1;XP_005173404.1	ZDB-GENE-030131-5767	-2.60566	5.8421	8.08932e-11	1.0293e-09	5.03562	6.38999	1358	3030	6.02576	13.8268	10.2103	22.0301
327590	NM_199832	tk1	thymidine kinase 1, soluble	protein_coding	NP_956126.1	ZDB-GENE-030131-5801	-4.30642	1.53255	1.00369e-11	1.43609e-10	1.05462	2.49804	46	170	0.257455	0.992595	0.436245	1.5815
327615	NM_001025297,XM_005162877	crp2	C-reactive protein 2	protein_coding	NP_001020468.1;XP_005162934.1	ZDB-GENE-030131-5826	-2.41099	-0.826475	0.0211185	0.0480772	0.383405	0.797757	13	27	0.147702	0.386255	0.250273	0.615418
327616	NM_199838	zp3d.1	zona pellucida glycoprotein 3d tandem duplicate 1	protein_coding	NP_956132.1	ZDB-GENE-030131-5827	4.50662	0.727387	8.64655e-09	8.20681e-08	1.8477	0.654718	111	21	0.79679	0.150605	1.35012	0.239958
327642	NM_001029949	lrrc8aa	leucine rich repeat containing 8 family, member Aa	protein_coding	NP_001025120.1	ZDB-GENE-030131-5853	-5.35894	2.56422	2.84422e-19	9.43573e-18	1.51092	3.44987	79	363	0.4055	1.92554	0.687098	3.06795
333933	NM_199843,NM_199843_dup1	shcbp1	SHC SH2-domain binding protein 1	protein_coding	NP_956137.1	ZDB-GENE-030131-5865	-2.58693	0.816882	4.23578e-05	0.000198731	0.970915	1.80268	41	91	0.227813	0.519804	0.386017	0.828202
333941	NM_207055,NM_207055_dup1,XM_005156270	zfp36l2	zinc finger protein 36, C3H type-like 2	protein_coding	NP_996938.1	ZDB-GENE-030131-5873	-2.12572	5.25998	3.44889e-07	2.50399e-06	4.67208	5.72984	1046	1904	6.16301	11.5558	8.96486	13.208
333997	NM_199848,NM_199848_dup1,XM_005159053,XM_005159054,XM_005159055,XM_021467594,XM_021467595	ampd3b	adenosine monophosphate deaminase 3b	protein_coding	NP_956142.1;XP_005159110.1;XP_005159111.1;XP_005159112.1;XP_021323269.1;XP_021323270.1	ZDB-GENE-030131-5929	-2.37506	5.31434	5.40693e-09	5.31918e-08	4.61807	5.83173	1006	2046	5.25784	10.9468	4.84747	9.47508
334017	NM_207056,NM_207056_dup1	pla1a	phospholipase A1 member A	protein_coding	NP_996939.1	ZDB-GENE-030131-5949	-2.57237	2.76825	3.86938e-08	3.30563e-07	2.26108	3.42804	162	357	0.743199	1.68454	1.25931	2.68397
334026	XM_002663682,XM_009305744,XM_009305746,XM_017358258	si:dkey-40c23.2	si:dkey-40c23.2, transcript variant X2	protein_coding	XP_002663728.2;XP_009304019.1;XP_009304021.1;XP_017213747.1	ZDB-GENE-030131-5958	-3.45569	3.56361	3.34741e-14	6.51908e-13	2.65356	4.27022	226	669	0.699724	2.17349	1.18565	3.46301
334065	NM_199854	rnf146	ring finger protein 146	protein_coding	NP_956148.2	ZDB-GENE-030131-5997	-2.61114	2.10693	2.7903e-07	2.07087e-06	1.75064	2.84411	101	226	0.625732	1.43774	1.06027	2.29075
334086	NM_199857,NM_199857_dup1,NM_199857_dup2,NM_199857_dup3	hspa4b	heat shock protein 4b	protein_coding	NP_956151.1	ZDB-GENE-030131-6018	-3.40613	5.04206	8.55566e-16	2.01288e-14	3.99456	5.69751	638	1861	6.15766	10.0369	7.42787	4.74135
334100	NM_199858,XM_005156271,XM_005156272,XM_005156273,XM_009306591	ldb3b	LIM domain binding 3b	protein_coding	NP_956152.1;XP_005156328.1;XP_005156329.1;XP_005156330.1;XP_009304866.1	ZDB-GENE-030131-6032	2.43064	3.32384	5.54212e-08	4.60741e-07	3.91617	2.76506	602	212	5.17352	1.8972	8.76625	3.0228
334108	XM_002664019	kif5bb	kinesin family member 5B, b	protein_coding	XP_002664065.1	ZDB-GENE-070629-4	-3.92797	3.53262	1.37434e-16	3.44945e-15	2.50674	4.27837	200	673	0.881638	3.05627	1.49389	4.86955
334113	NM_001083813	bcan	brevican	protein_coding	NP_001077282.1	ZDB-GENE-030131-6045	4.19552	4.34023	2.06865e-19	6.96158e-18	5.07022	3.13206	1392	284	3.87791	0.810582	6.57091	1.2915
334167	NM_212723,XM_021479017	mknk2a	MAP kinase interacting serine/threonine kinase 2a	protein_coding	NP_997888.1;XP_021334692.1	ZDB-GENE-030131-6099	-5.90877	8.94395	3.34067e-32	2.85627e-30	7.16552	9.72003	6088	30802	27.1381	140.845	45.9841	224.407
334247	XM_002666176	wu:fi37e09	wu:fi37e09	protein_coding	XP_002666222.2	ZDB-GENE-030131-6179	-3.01834	4.45363	8.44307e-13	1.38075e-11	3.57152	5.08203	465	1202	2.95082	7.83864	5.00002	12.4893
334269	NM_001346203,XM_021479555	myom2a	myomesin 2a	protein_coding	NP_001333132.1;XP_021335230.1	ZDB-GENE-030131-6201	2.57989	3.39849	6.88046e-09	6.65364e-08	4.00932	2.77662	645	214	1.99193	0.67618	3.37522	1.07736
334274	NM_001020485,XM_005171793	myhc4	myosin heavy chain 4	protein_coding	NP_001018321.1;XP_005171850.1	ZDB-GENE-030131-6206	2.32195	4.98978	2.01371e-08	1.79849e-07	5.50232	4.32833	1893	698	4.84863	1.83455	8.21575	2.92298
334304	NM_199886,NM_199886_dup1	ela2l	elastase 2 like	protein_coding	NP_956180.1	ZDB-GENE-040511-1	-2.41388	2.83033	2.24683e-07	1.70113e-06	2.3631	3.46066	177	366	3.15118	6.67837	5.33951	10.6406
334310	NM_001308551,NM_001308551_dup1	si:ch211-262i1.6	si:ch211-262i1.6	protein_coding	NP_001295480.1	ZDB-GENE-030131-6242	-2.04236	3.41818	8.71965e-06	4.74563e-05	3.00028	3.93574	299	523	2.67453	4.81095	3.10311	3.72164
334311	NM_001199970	angptl1b	angiopoietin-like 1b	protein_coding	NP_001186899.1	ZDB-GENE-030131-6243	2.11998	0.279294	0.00679035	0.0181985	1.36116	0.797757	67	27	0.571424	0.233903	0.968249	0.372677
334334	NM_201483,XM_021479057	ivns1abpb	influenza virus NS1A binding protein b	protein_coding	NP_958891.1;XP_021334732.1	ZDB-GENE-030131-6266	-4.93592	7.23493	1.50628e-26	9.07785e-25	5.69332	7.9743	2167	9159	11.5	50.0522	19.4862	79.7479
334395	NM_001327986,NM_001327986_dup1	slc43a1a	solute carrier family 43 (amino acid system L transporter), member 1a	protein_coding	NP_001314915.1	ZDB-GENE-030131-6327	-2.16359	2.20017	2.23708e-05	0.000111888	1.95615	2.85506	123	228	0.639065	1.22002	1.08286	1.94385
334446	NM_199900,NM_199900_dup1,XM_009306489	heatr1	HEAT repeat containing 1	protein_coding	NP_956194.1;XP_009304764.1	ZDB-GENE-030131-6378	2.07923	4.52702	1.39623e-06	8.90988e-06	5.00227	3.99386	1326	546	3.23648	1.49772	2.55395	1.97192
334500	NM_201194	scamp2l	secretory carrier membrane protein 2, like	protein_coding	NP_957488.1	ZDB-GENE-030131-6432	-2.67201	2.90192	7.21095e-09	6.92864e-08	2.33659	3.56435	173	396	1.17177	2.75789	1.9855	4.39413
334503	NM_001005293,NM_001005293_dup1	ric8b	RIC8 guanine nucleotide exchange factor B	protein_coding	NP_001005293.1	ZDB-GENE-030131-6435	-4.87781	5.3075	1.08342e-24	5.87307e-23	3.85445	6.0594	575	2402	4.91838	21.1117	8.33393	33.6372
334526	NM_001004503,NM_001114892,NM_199908	musk	muscle, skeletal, receptor tyrosine kinase	protein_coding	NP_001004503.1;NP_001108364.1;NP_956202.2	ZDB-GENE-030131-6458	-8.63327	2.03398	6.34674e-24	3.24007e-22	0.882056	3.05344	36	267	0.128967	1.04283	0.218527	1.66154
334561	NM_001099739	acsl4b	acyl-CoA synthetase long-chain family member 4b	protein_coding	NP_001093209.1	ZDB-GENE-030131-6493	-7.64203	5.72656	5.71316e-38	6.75083e-36	3.72758	6.56395	523	3423	2.16341	14.5547	3.66579	23.19
334613	NM_001013261,XM_005160284,XM_009305554	fn1b	fibronectin 1b	protein_coding	NP_001013279.1;XP_005160341.1;XP_009303829.1	ZDB-GENE-030131-6545	-7.86191	9.79001	1.66768e-41	2.37003e-39	7.64955	10.6182	8532	57436	16.009	110.66	27.1265	176.314
334724	NM_181758,XM_009301449	anxa1a	annexin A1a	protein_coding	NP_861423.1;XP_009299724.1	ZDB-GENE-030131-6664	-2.03189	9.61566	7.5019e-07	5.07682e-06	9.01816	10.0396	22099	38448	282.879	506.155	479.323	806.454
335008	XM_003201387	pla2g15	phospholipase A2, group XV	protein_coding	XP_003201435.2	ZDB-GENE-030131-6948	2.38345	6.46957	2.64657e-09	2.73003e-08	6.97457	5.73726	5328	1914	35.2475	13.0046	59.725	20.7202
335206	NM_199939,XM_005155942	arrdc2	arrestin domain containing 2	protein_coding	NP_956233.1;XP_005155999.1	ZDB-GENE-030131-7146	-2.01863	5.60289	1.69882e-06	1.06501e-05	5.052	6.04333	1374	2375	7.97753	14.1768	13.5175	22.5878
335231	NM_199942	fbp1a	fructose-1,6-bisphosphatase 1a	protein_coding	NP_956236.1	ZDB-GENE-030131-7171	-4.29	4.78627	8.54349e-21	3.29716e-19	3.51354	5.51456	445	1635	4.32341	16.3285	7.3258	26.0161
335269	NM_001024386,XM_005166790,XM_005166791	itgb4	integrin, beta 4	protein_coding	NP_001019557.1;XP_005166847.1;XP_005166848.1	ZDB-GENE-030131-7209	-6.24587	7.66324	1.04871e-33	9.84708e-32	5.83143	8.45296	2389	12777	4.42647	23.6404	7.50043	37.6661
335285	XM_003201484,XM_017355813,XM_017355814,XR_002458686,XR_661458	si:ch73-170d6.2	si:ch73-170d6.2, transcript variant X3	protein_coding	XP_003201532.2;XP_017211302.1;XP_017211303.1	ZDB-GENE-030131-7225	-3.43058	4.39167	2.50686e-15	5.59139e-14	3.38686	5.06446	404	1187	2.08542	6.19037	3.53364	9.86309
335307	XM_009304365,XM_009304366	wu:fl23c11	wu:fl23c11, transcript variant X1	protein_coding	XP_009302640.1;XP_009302641.1	ZDB-GENE-030131-7247	-16.1464	1.03866	2.08081e-22	9.15601e-21	0.303537	2.27164	10	140	0.053578	0.88644	0.090787	1.41236
335309	NM_001099232	agr1	anterior gradient 1	protein_coding	NP_001092702.2	ZDB-GENE-030131-7249	-2.05886	6.86249	5.98666e-07	4.1393e-06	6.26786	7.30007	3248	5726	60.7428	109.99	102.925	175.247
335340	XM_002666688	dnah5l	dynein, axonemal, heavy chain 5 like	protein_coding	XP_002666734.3	ZDB-GENE-091204-287	5.63884	2.39422	5.93426e-19	1.92835e-17	3.29347	1.35549	376	57	0.406111	0.063217	0.688134	0.100724
335386	XM_002663243,XM_009304328	cfap74	cilia and flagella associated protein 74, transcript variant X1	protein_coding	XP_002663289.3;XP_009302603.1	ZDB-GENE-081104-480	2.47461	0.019354	0.00206394	0.00638302	1.23767	0.629436	58	20	0.172928	0.059442	0.293018	0.094708
335392	NM_001305473	si:ch211-153b23.4	si:ch211-153b23.4	protein_coding	NP_001292402.1	ZDB-GENE-030131-7332	16.3951	4.1465	4.62224e-52	1.02336e-49	5.09711	1.59634	1419	74	7.18912	0.382307	12.1816	0.609128
335475	NM_001308554	wu:fj16a03	wu:fj16a03	protein_coding	NP_001295483.1	ZDB-GENE-030131-7415	3.18211	4.29929	1.31334e-13	2.37314e-12	4.94749	3.37579	1275	343	49.3692	13.6205	83.6534	21.7015
335521	NM_001305594	efhd1	EF-hand domain family, member D1	protein_coding	NP_001292523.1	ZDB-GENE-030131-7461	2.00216	6.35038	1.77841e-06	1.11061e-05	6.77804	5.78955	4644	1986	55.3289	24.2904	93.7519	38.7018
335530	XM_021477420	wu:fj19g03	wu:fj19g03	protein_coding	XP_021333095.1	ZDB-GENE-030131-7470	2.21471	0.321141	0.00358445	0.0103974	1.40008	0.797757	70	27	0.411898	0.160276	0.697939	0.255367
335655	NM_001302500,NM_001302500_dup1,NM_001302501,NM_001302501_dup1	gngt2a	guanine nucleotide binding protein (G protein), gamma transducing activity polypeptide 2a	protein_coding	NP_001289429.1;NP_001289430.1	ZDB-GENE-030131-7595	2.52318	6.98884	2.04032e-10	2.48058e-09	7.51436	6.19105	7765	2635	187.528	65.2543	81.3931	33.6651
335715	NM_199969,NM_199969_dup1	mdh1ab	malate dehydrogenase 1Ab, NAD (soluble)	protein_coding	NP_956263.1	ZDB-GENE-030131-7655	3.6245	5.60973	1.49495e-17	4.18687e-16	6.27486	4.46502	3264	771	30.5058	21.8444	51.6905	32.2407
335789	NM_001013262	crygmx	crystallin, gamma MX	protein_coding	NP_001013280.1	ZDB-GENE-030131-7732	-7.53129	9.69365	4.64664e-40	6.26492e-38	7.60825	10.5147	8290	53460	158.122	1047.21	267.93	1668.52
335821	NM_207059	aqp1a.1	aquaporin 1a (Colton blood group), tandem duplicate 1	protein_coding	NP_996942.1	ZDB-GENE-030131-7764	2.87735	6.48577	6.31817e-13	1.04467e-11	7.06515	5.56043	5676	1689	74.7462	22.8437	126.653	36.3967
335901	NM_212746	klf15	Kruppel-like factor 15	protein_coding	NP_997911.2	ZDB-GENE-030131-7844	-2.66848	1.36317	3.22361e-06	1.91966e-05	1.25192	2.2302	59	135	0.392048	0.929804	0.664304	1.48145
336038	NM_212750	junbb	jun B proto-oncogene b	protein_coding	NP_997915.1	ZDB-GENE-040426-2666	-2.24708	6.82971	2.39845e-08	2.11516e-07	6.15054	7.30732	2991	5755	28.0561	55.4366	47.5395	88.3268
336153	NM_001302225,XM_005166117,XM_021476790	grm2a	glutamate receptor, metabotropic 2a	protein_coding	NP_001289154.1;XP_005166174.1;XP_021332465.1	ZDB-GENE-030131-8097	2.50119	2.77961	1.12809e-07	8.94691e-07	3.42195	2.28789	415	142	1.80073	0.73212	3.05124	1.16648
336165	NM_200000	myl1	myosin, light chain 1, alkali; skeletal, fast	protein_coding	NP_956294.1	ZDB-GENE-030131-8109	2.18738	4.80082	2.0192e-07	1.541e-06	5.29165	4.20539	1630	638	23.1767	9.30701	39.2716	14.8288
336211	NM_001159664	zwi	zwilling	protein_coding	NP_001153136.1	ZDB-GENE-030131-8155	-2.01819	5.29644	1.96898e-06	1.21912e-05	4.75574	5.74169	1111	1920	4.19424	7.44491	7.10693	11.8619
336266	NM_001145684,XM_005156544,XM_009307148,XM_009307149,XM_009307150,XM_017358707,XM_021480538	loxl3b	lysyl oxidase-like 3b	protein_coding	NP_001139156.1;XP_005156601.1;XP_009305423.1;XP_009305424.1;XP_009305425.1;XP_017214196.1;XP_021336213.1	ZDB-GENE-030131-8210	2.2279	3.31521	8.45061e-07	5.65336e-06	3.87302	2.83308	583	224	2.5432	1.09745	4.30931	1.74856
336351	NM_212753,XM_005163364	prg4a	proteoglycan 4a	protein_coding	NP_997918.2;XP_005163421.1	ZDB-GENE-030131-8295	11.8622	0.888619	2.4291e-17	6.60949e-16	2.09705	0.348776	140	10	1.08959	0.075752	1.84626	0.120696
336380	XM_002663518,XM_005155644	si:dkey-242g16.2	si:dkey-242g16.2, transcript variant X2	protein_coding	XP_002663564.1;XP_005155701.1	ZDB-GENE-030131-8324	-6.86152	5.46036	2.37575e-34	2.32415e-32	3.608	6.28208	478	2809	4.15914	25.1443	7.04744	40.0622
336391	NM_001128668,NM_001128668_dup1	tmed3	transmembrane p24 trafficking protein 3	protein_coding	NP_001122140.1	ZDB-GENE-030131-8335	-3.1908	2.2762	3.63611e-10	4.23938e-09	1.7202	3.05819	98	268	1.84827	5.23229	3.13179	8.33659
336473	NM_182866,NM_182866_dup1	glulb	glutamate-ammonia ligase (glutamine synthase) b	protein_coding	NP_878286.3	ZDB-GENE-030131-8417	-2.06119	7.67909	5.09391e-07	3.57372e-06	7.07546	8.11344	5717	10090	33.5881	60.8796	48.6356	86.6592
336478	XM_005169748,XM_005169750,XM_021466906,XM_021466907,XM_021466908,XM_021472987	si:dkey-92i15.4	si:dkey-92i15.4, transcript variant X2	protein_coding	XP_005169805.2;XP_005169807.2;XP_021328662.1	ZDB-GENE-030131-8422	-2.62228	0.795847	4.3055e-05	0.000201508	0.953575	1.79132	40	90	0.127204	0.303493	0.215541	0.483554
336504	NM_194378	arpc5a	actin related protein 2/3 complex, subunit 5A	protein_coding	NP_919359.2	ZDB-GENE-030131-8448	-2.32405	6.05636	8.31911e-09	7.92104e-08	5.35822	6.55475	1709	3401	7.76896	15.8787	13.1641	25.2994
336518	NM_212754,XM_005169428	polr3e	polymerase (RNA) III (DNA directed) polypeptide E	protein_coding	NP_997919.1;XP_005169485.1	ZDB-GENE-030131-8462	2.28705	6.66872	1.28719e-08	1.18743e-07	7.15465	5.9741	6042	2262	28.3382	10.9852	48.0176	17.5026
336526	NM_198876	b3gnt5a	UDP-GlcNAc:betaGal beta-1,3-N-acetylglucosaminyltransferase 5a	protein_coding	NP_942577.1	ZDB-GENE-030131-8470	-4.89353	4.31	4.2309e-23	2.0317e-21	2.94871	5.0832	287	1203	1.90807	8.21912	3.23313	13.0955
336529	NM_212755	oprd1b	opioid receptor, delta 1b	protein_coding	NP_997920.2	ZDB-GENE-030131-8473	2.8943	0.36882	6.36043e-05	0.000287326	1.49902	0.70399	78	23	0.505578	0.153153	0.856675	0.244019
336597	NM_001001594,NM_001001594_dup1,XM_021480032	capgb	capping protein (actin filament), gelsolin-like b	protein_coding	NP_001001594.2;XP_021335707.1	ZDB-GENE-030131-8541	-2.71829	5.45961	1.66646e-11	2.33049e-10	4.62356	6.0289	1010	2351	9.66831	23.1363	16.3824	36.8629
336610	NM_212757	ywhaz	tyrosine 3-monooxygenase/tryptophan 5-monooxygenase activation protein, zeta polypeptide	protein_coding	NP_997922.2	ZDB-GENE-030131-8554	-3.50787	9.28977	9.57965e-18	2.7339e-16	8.12244	9.92934	11858	35617	100.14	308.9	169.682	492.169
336623	NM_001089344,XM_009301921	gsnb	gelsolin b	protein_coding	NP_001082813.1;XP_009300196.1	ZDB-GENE-030131-8567	-3.19966	7.08841	2.26089e-15	5.07507e-14	6.03988	7.70269	2767	7581	17.2244	48.7151	29.1858	77.6175
336650	NM_213642	abracl	ABRA C-terminal like	protein_coding	NP_998807.1	ZDB-GENE-030131-8594	-2.13139	5.67761	2.52862e-07	1.89269e-06	5.07323	6.14217	1395	2546	11.2002	20.9926	18.9781	33.4474
336655	NM_212761	icn	ictacalcin	protein_coding	NP_997926.1	ZDB-GENE-030131-8599	-2.26339	10.4902	1.29569e-08	1.19475e-07	9.78541	10.963	37643	72953	1398.19	2782.74	2369.16	4433.73
336673	NM_001017865,NM_001017865_dup1,NM_001017865_dup2	ch25hl1.1	cholesterol 25-hydroxylase like 1, tandem duplicate 1	protein_coding	NP_001017865.1	ZDB-GENE-030131-8617	-3.56593	3.28735	2.79364e-14	5.4966e-13	2.39556	4.01841	182	556	2.58698	8.13062	4.38351	12.9545
336679	NM_001199436,XM_017357283,XM_017357284,XM_017357286,XM_021478191,XM_021478192,XM_021478193,XM_021478194,XM_021478195,XM_021478196,XM_021478197,XM_021478198	csde1	cold shock domain containing E1, RNA-binding	protein_coding	NP_001186365.1;XP_017212772.1;XP_017212773.1;XP_017212775.1;XP_021333866.1;XP_021333867.1;XP_021333868.1;XP_021333869.1;XP_021333870.1;XP_021333871.1;XP_021333872.1;XP_021333873.1	ZDB-GENE-030131-8623	-2.15566	8.8561	9.02564e-08	7.28458e-07	8.20295	9.30846	12541	23148	41.4247	78.6878	70.192	125.373
336695	NM_001128669,XM_005157729,XM_021481348,XM_021481349,XR_002459977	samsn1a	SAM domain, SH3 domain and nuclear localisation signals 1a	protein_coding	NP_001122141.1;XP_005157786.1;XP_021337023.1;XP_021337024.1	ZDB-GENE-030131-8639	2.71958	6.28994	9.7386e-12	1.39626e-10	6.8495	5.4274	4882	1537	34.5184	11.3106	58.4896	18.0211
336806	XM_017354518	wu:fb05h10	wu:fb05h10	protein_coding	XP_017210007.1	ZDB-GENE-030131-8750	3.69377	1.7973	1.14384e-10	1.4312e-09	2.66957	1.29245	229	53	0.5145	0.121191	0.871794	0.193093
336830	NM_212763,NM_212763_dup1	mpzl2b	myelin protein zero-like 2b	protein_coding	NP_997928.1	ZDB-GENE-030131-8774	-2.42443	4.63081	5.40296e-09	5.31776e-08	3.94936	5.17124	617	1281	6.95248	14.8258	8.12184	13.3381
336888	NM_001044755,XM_005160641,XM_005160642	susd6	sushi domain containing 6	protein_coding	NP_001038220.1;XP_005160698.1;XP_005160699.1	ZDB-GENE-030131-8832	-3.95819	6.57433	2.24509e-20	8.43231e-19	5.3011	7.25842	1641	5562	5.19458	18.1411	8.80195	28.9042
336933	NM_200040	rhogb	ras homolog family member Gb	protein_coding	NP_956334.1	ZDB-GENE-030131-8877	-2.52893	2.52084	1.42552e-07	1.11626e-06	2.08117	3.19803	138	299	1.10634	2.4667	1.87463	3.93018
336965	NM_001080161	s100v2	S100 calcium binding protein V2	protein_coding	NP_001073630.2	ZDB-GENE-030131-8909	-2.18339	6.3384	8.17593e-08	6.64468e-07	5.69527	6.80672	2170	4057	35.2193	67.6333	59.6773	107.76
337077	XM_001919721	sdc3	syndecan 3	protein_coding	XP_001919756.7	ZDB-GENE-030131-9021	-6.87482	3.76395	1.20445e-29	8.95167e-28	2.15129	4.62547	147	866	0.908069	5.49351	1.53868	8.75278
337131	NM_200051,NM_200051_dup1	c1galt1b	core 1 synthase, glycoprotein-N-acetylgalactosamine 3-beta-galactosyltransferase, 1b	protein_coding	NP_956345.1	ZDB-GENE-030131-9075	-2.7459	3.22923	9.41735e-10	1.04086e-08	2.58201	3.87788	213	501	1.92133	4.65568	3.25559	7.41788
337153	NM_205565	zgc:77151	zgc:77151	protein_coding	NP_991128.2	ZDB-GENE-030131-9097	-2.75207	3.69501	2.38357e-10	2.85824e-09	2.97902	4.31847	294	693	1.54343	3.73442	2.61527	5.95003
337193	NM_200054	setd3	SET domain containing 3	protein_coding	NP_956348.1	ZDB-GENE-030131-9137	-3.31835	6.10742	5.93177e-16	1.41455e-14	5.04076	6.74037	1363	3873	5.52907	16.142	9.36873	25.719
337225	NM_200057	chid1	chitinase domain containing 1	protein_coding	NP_956351.1	ZDB-GENE-030131-9169	2.08294	4.65482	1.16616e-06	7.54934e-06	5.12739	4.11265	1450	596	17.1479	7.23527	29.0563	11.5279
337272	XM_005157661	pitpnm3	PITPNM family member 3	protein_coding	XP_005157718.1	ZDB-GENE-030131-9216	-3.6986	2.28555	2.05587e-12	3.18887e-11	1.61385	3.10938	88	279	0.377634	1.23577	0.63988	1.96894
337325	NM_001128670	pdzk1	PDZ domain containing 1	protein_coding	NP_001122142.2	ZDB-GENE-031222-1	5.37899	-0.98455	0.00023063	0.000911642	0.806805	0.184902	32	5	0.21349	0.028869	0.361748	0.045997
337386	NM_001128671	snx1a	sorting nexin 1a	protein_coding	NP_001122143.2	ZDB-GENE-060302-3	-2.07565	6.5742	4.78721e-07	3.37092e-06	5.97584	7.01751	2645	4701	12.7957	23.3555	21.6817	37.2123
337413	NM_001130590,NM_001130590_dup1	stat6	signal transducer and activator of transcription 6, interleukin-4 induced	protein_coding	NP_001124062.1	ZDB-GENE-030131-9359	-3.7624	3.00128	1.4443e-14	2.96025e-13	2.12054	3.76632	143	461	0.796198	2.6513	0.576373	2.32867
337436	NM_200065,XM_005164716	dennd6b	DENN/MADD domain containing 6B	protein_coding	NP_956359.1;XP_005164773.1	ZDB-GENE-030131-9382	2.05294	3.24785	9.93014e-06	5.324e-05	3.77524	2.84411	542	226	2.68456	1.13861	4.54885	1.81414
337489	NM_200068,XM_005163356	plcd1b	phospholipase C, delta 1b	protein_coding	NP_956362.1;XP_005163413.1	ZDB-GENE-030131-9435	-5.74006	5.16104	7.9996e-29	5.57138e-27	3.53702	5.95196	453	2227	2.30206	11.621	3.90072	18.5157
337514	NM_001351837,NM_212779,XM_021479113	mpx	myeloid-specific peroxidase	protein_coding	NP_001338766.1;NP_997944.2;XP_021334788.1	ZDB-GENE-030131-9460	9.75102	1.19835	2.04189e-18	6.24231e-17	2.32989	0.49592	172	15	0.824646	0.07263	1.39732	0.115722
337572	NM_001017661,XM_009292324	ctss2.2	cathepsin S, ortholog 2, tandem duplicate 2	protein_coding	NP_001017661.1;XP_009290599.1	ZDB-GENE-050626-55	-2.049	3.47324	7.09316e-06	3.9437e-05	3.046	3.98889	310	544	3.89372	7.06033	6.5977	11.2492
337574	NM_001327756,NM_001327756_dup1	nfatc2ip	nuclear factor of activated T-cells, cytoplasmic, calcineurin-dependent 2 interacting protein	protein_coding	NP_001314685.1	ZDB-GENE-030131-9520	2.17087	3.27673	2.06287e-06	1.27351e-05	3.82615	2.82197	563	222	6.15259	2.48751	3.24228	3.68966
337591	NM_001291713,NM_200070	fam49ba	family with sequence similarity 49, member Ba	protein_coding	NP_001278642.1;NP_956364.2	ZDB-GENE-030131-9537	-2.19975	4.17756	3.03299e-07	2.23052e-06	3.61904	4.69109	482	908	3.83119	7.41294	6.49176	11.811
337731	NM_212783	pvalb4	parvalbumin 4	protein_coding	NP_997948.2	ZDB-GENE-040625-48	2.46053	4.81885	2.54269e-09	2.62932e-08	5.35905	4.11037	1710	595	41.8338	14.9398	70.8852	23.8035
337767	NM_001243045,XM_005162045,XM_005162046,XM_017353525	lamb2	laminin, beta 2 (laminin S)	protein_coding	NP_001229974.1;XP_005162102.1;XP_005162103.1;XP_017209014.1	ZDB-GENE-081030-4	2.32112	3.29735	2.7355e-07	2.03091e-06	3.87302	2.78237	583	215	1.49576	0.467016	2.53448	0.744095
337795	NM_001077794	dact2	dishevelled-binding antagonist of beta-catenin 2	protein_coding	NP_001071262.2	ZDB-GENE-030131-9975	3.16833	0.87679	1.48635e-06	9.43343e-06	1.88476	0.885799	115	31	0.578184	0.156151	0.979702	0.248794
338204	NM_198208	tfdp2	transcription factor Dp-2	protein_coding	NP_937851.1	ZDB-GENE-030219-104	2.13607	3.74442	1.50677e-06	9.54532e-06	4.26088	3.24872	776	311	6.07527	2.49687	10.2942	3.97824
338214	NM_198914,XM_005155998	sult2st1	sulfotransferase family 2, cytosolic sulfotransferase 1	protein_coding	NP_944596.2;XP_005156055.1	ZDB-GENE-030219-114	-2.74031	4.36583	6.49181e-11	8.35121e-10	3.58566	4.96185	470	1103	5.52025	13.5359	9.35377	21.5667
338267	NM_200318,NM_200318_dup1	arl4ab	ADP-ribosylation factor-like 4ab	protein_coding	NP_956612.1	ZDB-GENE-030219-167	-2.00782	4.3748	4.6153e-06	2.67426e-05	3.8845	4.8404	588	1011	4.79907	8.47459	6.85599	1.22643
338313	NM_001012367,XM_005157570,XM_021481353	mcamb	melanoma cell adhesion molecule b	protein_coding	NP_001012367.2;XP_005157627.1;XP_021337028.1	ZDB-GENE-030219-213	2.67314	3.57575	1.09487e-09	1.19939e-08	4.19046	2.89804	737	236	3.13844	1.02947	5.31792	1.64025
338317	NM_001243038,XM_005168966,XM_009303310,XM_009303311	creb3l1	cAMP responsive element binding protein 3-like 1	protein_coding	NP_001229967.1;XP_005169023.1;XP_009301585.1;XP_009301586.1	ZDB-GENE-030219-181	-2.14053	3.2518	2.96878e-06	1.78051e-05	2.81588	3.8007	258	473	1.00759	2.00854	1.70732	3.2002
347743	NM_178133	seph	selenoprotein H	protein_coding	NP_835234.2	ZDB-GENE-030411-2	2.7646	2.60713	9.64596e-09	9.09791e-08	3.30034	2.07029	378	117	7.19158	2.27121	12.1858	3.61871
352926	NM_001007281,NM_001007281_dup1	gpx1a	glutathione peroxidase 1a	protein_coding	NP_001007282.2	ZDB-GENE-030410-1	2.10082	4.40472	1.11058e-06	7.21621e-06	4.88826	3.8698	1222	498	19.1062	7.99383	32.3745	12.7365
352928	NM_001007282,NM_001346537	gpx4a	glutathione peroxidase 4a	protein_coding	NP_001007283.2;NP_001333466.1	ZDB-GENE-030410-2	2.26456	5.5417	3.06076e-08	2.66021e-07	6.03422	4.88248	2756	1042	47.1203	18.2701	79.8428	29.1096
352935	NM_178300,NM_178300_dup1,XM_005166616,XM_009303573,XM_021477412	arntl1b	aryl hydrocarbon receptor nuclear translocator-like 1b	protein_coding	NP_840085.1	ZDB-GENE-030408-1	3.16468	4.08637	3.33355e-13	5.70036e-12	4.73939	3.18941	1098	297	7.43221	2.13957	9.42989	3.40897
352940	NM_001243004,NM_001243005,NM_001243006,NM_178303,XM_005169552	fgfr2	fibroblast growth factor receptor 2	protein_coding	NP_001229933.1;NP_001229934.1;NP_001229935.1;NP_840088.2;XP_005169609.1	ZDB-GENE-030323-1	-2.08652	5.07704	7.70595e-07	5.20152e-06	4.51398	5.54192	933	1667	2.80019	5.07855	4.74478	8.09163
352944	NM_178307	cxcl12a	chemokine (C-X-C motif) ligand 12a (stromal cell-derived factor 1)	protein_coding	NP_840092.1	ZDB-GENE-030318-1	2.52268	4.44265	1.67525e-09	1.78499e-08	5.00227	3.73407	1326	450	13.4938	4.69677	22.8646	7.48334
353150	NM_180969	cntn1a	contactin 1a	protein_coding	NP_851300.2	ZDB-GENE-030427-1	2.04263	3.43837	8.93474e-06	4.85342e-05	3.95154	3.01491	618	259	4.58829	1.97705	7.77462	3.15002
353154	NM_180973	sp5a	Sp5 transcription factor a	protein_coding	NP_851304.2	ZDB-GENE-030430-2	2.53241	1.36653	1.27821e-05	6.71777e-05	2.20357	1.27626	154	52	0.764165	0.260827	1.29484	0.415575
353224	NM_181495,NM_181495_dup1	nrarpa	notch-regulated ankyrin repeat protein a	protein_coding	NP_852472.1	ZDB-GENE-030515-6	-2.95833	4.75776	1.14163e-12	1.83017e-11	3.87302	5.37131	583	1477	2.83733	7.39216	4.80771	11.7779
353225	NM_181496	nrarpb	notch-regulated ankyrin repeat protein b	protein_coding	NP_852473.1	ZDB-GENE-030515-7	-2.82123	2.51557	4.62041e-09	4.60848e-08	1.99056	3.23202	127	307	0.597916	1.49113	1.01314	2.37581
359828	NM_182869	hic2	hypermethylated in cancer 2	protein_coding	NP_878289.2	ZDB-GENE-030619-1	-2.85229	1.10982	2.86061e-06	1.723e-05	1.07079	2.05138	47	115	0.345632	0.86341	0.585655	1.37567
359829	NM_001013264,XM_021480985,XM_021480986	fgf18a	fibroblast growth factor 18a	protein_coding	NP_001013282.1;XP_021336660.1;XP_021336661.1	ZDB-GENE-030714-1	-4.27705	-0.598602	9.19403e-05	0.000399872	0.303537	1.00854	10	37	0.045402	0.191117	0.076932	0.304506
359834	NM_182873	tgfb1a	transforming growth factor, beta 1a	protein_coding	NP_878293.1	ZDB-GENE-030618-1	-3.645	3.22239	1.63616e-14	3.32818e-13	2.32315	3.96383	171	534	1.68739	5.40907	2.8592	8.61825
359837	NM_182876,XM_009302663	wnt2ba	wingless-type MMTV integration site family, member 2Ba	protein_coding	NP_878296.1;XP_009300938.1	ZDB-GENE-030717-2	2.63551	-0.840371	0.0126641	0.0310629	0.787362	0.348776	31	10	0.270907	0.089267	0.459037	0.142229
360143	NM_001128672,XM_009305797	mxb	myxovirus (influenza) resistance B	protein_coding	NP_001122144.1;XP_009304072.1	ZDB-GENE-030721-6	-2.28175	4.32875	7.17325e-08	5.86606e-07	3.72503	4.85275	522	1020	3.63252	7.30242	6.15512	11.6349
360145	NM_001007284,XM_005167671	mxc	myxovirus (influenza virus) resistance C	protein_coding	NP_001007285.1;XP_005167728.1	ZDB-GENE-030721-7	-7.07605	4.52409	5.39446e-33	4.8696e-31	2.74206	5.3675	243	1473	1.31703	8.35931	2.23165	13.3189
360149	NM_182889,XM_005172511	nfe2l2a	nuclear factor, erythroid 2-like 2a	protein_coding	NP_878309.1;XP_005172568.1	ZDB-GENE-030723-2	-2.02357	6.21617	1.26615e-06	8.14401e-06	5.64822	6.65054	2099	3637	7.13979	14.0364	12.098	22.3642
360151	NM_182891	opn1mw2	opsin 1 (cone pigments), medium-wave-sensitive, 2	protein_coding	NP_878311.1	ZDB-GENE-030728-5	-3.43383	9.33396	3.12702e-17	8.42134e-16	8.19028	9.96661	12431	36550	116.898	352.988	198.078	562.415
360218	NM_001002387	pbk	PDZ binding kinase	protein_coding	NP_001002387.1	ZDB-GENE-030523-2	-4.21188	2.04355	1.95063e-13	3.44479e-12	1.36116	2.92945	67	242	0.604713	2.27178	1.02466	3.61962
368220	NM_001272084,NM_212791	adka	adenosine kinase a	protein_coding	NP_001259013.1;NP_997956.1	ZDB-GENE-030425-3	-3.21167	4.32229	6.60632e-14	1.24174e-12	3.39008	4.97571	405	1114	2.41824	6.77379	4.09759	10.7926
368228	NM_200083	penka	proenkephalin a	protein_coding	NP_956377.2	ZDB-GENE-030729-31	3.6558	4.32674	1.95885e-16	4.85283e-15	5.018	3.26112	1341	314	14.4839	3.48174	24.5422	5.54744
368234	NM_001005586,XM_005165122,XM_005165123,XM_005165124	plp1b	proteolipid protein 1b	protein_coding	NP_001005586.1;XP_005165179.1;XP_005165180.1;XP_005165181.1	ZDB-GENE-030710-6	-2.91127	5.41202	9.23579e-13	1.49774e-11	4.50805	6.0076	929	2316	8.21598	21.2032	13.9216	33.783
368241	NM_001328404,NM_183341,XM_021467119	egr2a	early growth response 2a	protein_coding	NP_001315333.1;NP_899184.1;XP_021322794.1	ZDB-GENE-030723-6	-3.52873	0.837887	1.77288e-07	1.3634e-06	0.825989	1.90103	33	100	0.298293	0.94667	0.505442	1.50832
368249	NM_183342,XM_005174210	prickle1a	prickle homolog 1a	protein_coding	NP_899185.2;XP_005174267.1	ZDB-GENE-030724-5	-7.43884	2.13135	1.42902e-22	6.4361e-21	1.02172	3.11849	44	281	0.231035	1.63101	0.391477	2.59868
368250	NM_183343,XM_005155827	prickle2b	prickle homolog 2b	protein_coding	NP_899186.1;XP_005155884.1	ZDB-GENE-030724-6	2.24802	3.08833	1.01613e-06	6.64768e-06	3.66504	2.63137	499	190	2.24328	0.879642	3.80112	1.40153
368253	NM_001013265,XM_021468369,XM_021468370	pinx1	PIN2/TERF1 interacting, telomerase inhibitor 1	protein_coding	NP_001013283.2;XP_021324044.1;XP_021324045.1	ZDB-GENE-030515-2	-2.27896	4.83602	4.24911e-08	3.60369e-07	4.20152	5.34535	743	1450	9.90157	20.0756	16.7777	31.9863
368254	NM_183344	paqr8	progestin and adipoQ receptor family member VIII	protein_coding	NP_899187.1	ZDB-GENE-030728-3	-2.23316	-0.895974	0.0383018	0.0794009	0.383405	0.751635	13	25	0.131462	0.274245	0.222756	0.436953
368260	NM_201318,XM_005171666,XM_005171667,XM_021474937	nap1l1	nucleosome assembly protein 1-like 1	protein_coding	NP_958475.1;XP_005171723.1;XP_005171724.1;XP_021330612.1	ZDB-GENE-030516-2	-2.43013	8.46505	7.73172e-10	8.65928e-09	7.69362	8.97057	8798	18307	37.3413	87.317	63.2728	139.122
368263	NM_001001950	zic3	zic family member 3 heterotaxy 1 (odd-paired homolog, Drosophila)	protein_coding	NP_001001950.1	ZDB-GENE-030708-2	3.39109	4.10831	1.44684e-14	2.96025e-13	4.78299	3.14103	1133	286	5.98796	1.548	10.1463	2.46642
368288	NM_197942,XM_005166462,XM_005166464,XM_017356819	rassf7b	Ras association (RalGDS/AF-6) domain family (N-terminal) member 7b	protein_coding	NP_922933.1;XP_005166519.1;XP_005166521.1;XP_017212308.1	ZDB-GENE-030429-1	-2.94338	3.28941	6.08067e-11	7.86077e-10	2.57068	3.95876	211	532	1.78701	4.66291	3.028	7.4294
368316	NM_199430,XM_005168860	ccnb2	cyclin B2	protein_coding	NP_955462.1;XP_005168917.1	ZDB-GENE-030429-12	-2.37089	0.197842	0.00130803	0.00427335	0.727412	1.35549	28	57	0.27771	0.603666	0.470565	0.961818
368323	XM_001920844,XM_005165439,XM_021471672,XM_021471673,XM_021471674,XM_021471675,XM_021471676,XM_021476613,XM_021476614,XM_021476615,XR_001799371,XR_002457052,XR_002457053,XR_661698	si:ch211-204c21.1	si:ch211-204c21.1, transcript variant X1	protein_coding	XP_001920879.3;XP_005165496.1;XP_021332288.1;XP_021332289.1;XP_021332290.1	ZDB-GENE-030429-35	-2.56853	5.85973	1.48956e-10	1.84154e-09	5.0672	6.4017	1389	3055	4.17261	9.79353	7.07027	15.604
368326	NM_001113731,NM_001113731_dup1,NM_001113731_dup2,NM_001113731_dup3	il13ra2	interleukin 13 receptor, alpha 2	protein_coding	NP_001107203.1	ZDB-GENE-030521-10	-2.60327	2.68918	3.50584e-08	3.01835e-07	2.18882	3.3605	152	339	1.79028	4.12261	1.93895	6.56853
368367	XM_021476561,XM_689815	hsd20b2	hydroxysteroid (20-beta) dehydrogenase 2	protein_coding	XP_694907.4	ZDB-GENE-030804-21	2.45467	0.931866	0.000123038	0.000522166	1.85705	1.04724	112	39	0.760314	0.262663	1.28831	0.4185
368397	NM_001045280,NM_001045280_dup1,XM_005170678,XM_009298029	pkp3a	plakophilin 3a	protein_coding	NP_001038745.1	ZDB-GENE-060512-114	-6.83358	8.47643	9.86985e-37	1.04845e-34	6.52241	9.28164	3883	22721	15.7992	114.784	26.7709	149.738
368416	NM_198360,NM_198360_dup1,XM_005157132,XM_005157133,XM_009307719,XM_021480987,XR_002459908,XR_002459909	gria3b	glutamate receptor, ionotropic, AMPA 3b	protein_coding	NP_938174.1;XP_005157189.1;XP_005157190.1;XP_009305994.1;XP_021336662.1	ZDB-GENE-030616-53	2.37756	4.16152	2.26043e-08	2.001e-07	4.70612	3.53061	1072	386	5.34915	1.97571	6.95549	2.61384
368424	NM_001012313,XM_005158722,XM_005158723	snx9a	sorting nexin 9a	protein_coding	NP_001012313.2;XP_005158779.1;XP_005158780.1	ZDB-GENE-030616-66	-3.134	3.67402	1.34045e-12	2.12783e-11	2.83967	4.34395	263	706	0.993264	2.70446	1.68303	4.309
368433	NM_001039135	inppl1b	inositol polyphosphate phosphatase-like 1b	protein_coding	NP_001034224.2	ZDB-GENE-030616-75	2.43021	1.59525	1.32622e-05	6.94236e-05	2.37617	1.44516	179	63	0.73481	0.265026	1.2451	0.422265
368438	NM_001098242,NM_001098242_dup1	cntfr	ciliary neurotrophic factor receptor	protein_coding	NP_001091712.1	ZDB-GENE-030616-82	2.32109	2.59963	1.61027e-06	1.01434e-05	3.23007	2.20475	358	132	2.90615	1.0996	3.77001	1.4743
368449	NM_200089,NM_200089_dup1	epb41l5	erythrocyte membrane protein band 4.1 like 5	protein_coding	NP_956383.1	ZDB-GENE-030616-450	2.31654	7.04827	7.01063e-09	6.76087e-08	7.53764	6.33582	7892	2917	30.0556	11.4069	23.3998	15.8535
368450	NM_001007168,XM_005171273	ing5b	inhibitor of growth family, member 5b	protein_coding	NP_001007169.1;XP_005171330.1	ZDB-GENE-030616-462	-3.34443	2.20574	1.01665e-10	1.2789e-09	1.63575	3.01003	90	258	1.23154	3.64796	2.08678	5.81227
368461	NM_001004502	lpar1	lysophosphatidic acid receptor 1	protein_coding	NP_001004502.2	ZDB-GENE-030616-499	-5.76808	-0.404896	1.04e-06	6.78904e-06	0.275901	1.15747	9	45	0.078618	0.428441	0.133213	0.682634
368476	NM_001012482,XM_009307525,XM_009307527,XM_017358709,XM_017358710,XM_017358711,XM_017358712,XM_017358713,XM_017358714	pcdh15a	protocadherin-related 15a	protein_coding	NP_001012500.1;XP_009305800.1;XP_009305802.1;XP_017214198.1;XP_017214199.1;XP_017214200.1;XP_017214201.1;XP_017214202.1;XP_017214203.1	ZDB-GENE-030616-3	2.47671	4.15778	5.45874e-09	5.36512e-08	4.71901	3.48905	1082	374	2.60517	0.925297	4.41433	1.47427
368478	NM_200090	wdr75	WD repeat domain 75	protein_coding	NP_956384.1	ZDB-GENE-030616-5	-2.93423	5.87122	3.45607e-13	5.90508e-12	4.94201	6.46381	1270	3191	7.09646	18.323	12.0246	29.1939
368481	NM_200091,XM_005167878,XM_009304879,XM_021478619,XM_021478620,XM_021478621,XM_021478622,XM_021478623,XR_002459471,XR_002459472	stat1b	signal transducer and activator of transcription 1b	protein_coding	NP_956385.2;XP_005167935.1;XP_009303154.1;XP_021334294.1;XP_021334295.1;XP_021334296.1;XP_021334297.1;XP_021334298.1	ZDB-GENE-030616-23	-2.1692	6.54243	9.80886e-08	7.85045e-07	5.90205	7.0062	2511	4664	11.8159	20.7122	20.0214	33.0007
368485	XM_002666654,XM_005162744,XM_021470320,XM_021473782,XM_021474549	ctnnd2a	catenin (cadherin-associated protein), delta 2a, transcript variant X5	protein_coding	XP_021330224.1	ZDB-GENE-030616-60	-2.42861	5.12104	2.91376e-09	2.98952e-08	4.41135	5.65116	866	1801	2.97697	6.72301	5.04431	10.7117
368488	NM_200092	bcap31	B-cell receptor-associated protein 31	protein_coding	NP_956386.1	ZDB-GENE-030616-63	-2.13347	3.79006	1.37788e-06	8.80078e-06	3.29347	4.30656	376	687	5.22267	9.80393	8.84954	15.6206
368511	NM_001005573,NM_001005573_dup1	tmub2	transmembrane and ubiquitin-like domain containing 2	protein_coding	NP_001005573.1	ZDB-GENE-030616-254	-2.14187	1.0456	0.000566463	0.00203179	1.19403	1.91156	55	101	0.8175	1.53164	1.38521	2.44035
368564	NM_200628,XM_005157963	skap2	src kinase associated phosphoprotein 2	protein_coding	NP_956922.1;XP_005158020.1	ZDB-GENE-030616-438	2.22024	1.23516	0.000213827	0.000853889	2.05702	1.27626	135	52	1.54559	0.575942	2.61893	0.917646
368620	NM_001007038,NM_001007038_dup1	abcc4	ATP-binding cassette, sub-family C (CFTR/MRP), member 4	protein_coding	NP_001007039.1	ZDB-GENE-030616-511	-2.1427	4.82447	3.75377e-07	2.7048e-06	4.24849	5.30699	769	1411	2.15597	4.06582	3.65317	6.47805
368624	NR_037706,NR_037706_dup1,NR_037706_dup2,NR_037706_dup3	ftr53	finTRIM family, member 53	transcribed_pseudogene	.	ZDB-GENE-030616-515	-7.75956	-0.839237	1.50761e-06	9.54532e-06	0.159737	0.948475	5	34	0.029507	0.251392	0.049998	0.274722
368645	NM_001003574,NM_001004514	tmem267	transmembrane protein 267	protein_coding	NP_001003574.1;NP_001004514.1	ZDB-GENE-030616-546	-2.73185	0.0652683	0.000448896	0.00165324	0.621602	1.30847	23	54	0.277281	0.623589	0.469839	0.993561
368684	NM_001005304,NM_001005304_dup1,NM_001005304_dup2,NM_001005304_dup3,XM_005167970,XM_021478625	scel	sciellin	protein_coding	NP_001005304.1;XP_005168027.1;XP_021334300.1	ZDB-GENE-030616-15	-5.29471	6.49216	2.7209e-28	1.82839e-26	4.88712	7.25171	1221	5536	8.10716	38.0443	8.46941	37.7438
368709	NM_001007209,NM_001007210,XM_005170975,XM_021481071	si:busm1-105l16.2	si:busm1-105l16.2	protein_coding	NP_001007210.1;NP_001007211.1;XP_005171032.1;XP_021336746.1	ZDB-GENE-030616-108	-5.88831	3.10112	1.45812e-23	7.30204e-22	1.79998	3.96635	106	535	1.02905	6.0503	1.74367	9.63992
368717	NM_001326476,NM_001326476_dup1	itpka	inositol-trisphosphate 3-kinase A	protein_coding	NP_001313405.1	ZDB-GENE-030616-116	-2.51458	3.2729	1.68018e-08	1.52128e-07	2.69588	3.88591	234	504	1.25691	2.78142	2.12977	3.70507
368723	NM_001127185,XM_005161703,XM_009296229,XM_009296230,XM_009296231	inadl	InaD-like (Drosophila)	protein_coding	NP_001120657.1;XP_005161760.1;XP_009294504.1;XP_009294505.1;XP_009294506.1	ZDB-GENE-030616-129	-2.41418	3.14921	8.89164e-08	7.18592e-07	2.62646	3.75468	221	457	0.559826	1.19206	0.948596	1.8993
368752	NM_001007051,NM_001007051_dup1	vat1	vesicle amine transport 1	protein_coding	NP_001007052.3	ZDB-GENE-030616-178	2.56314	6.10163	1.4896e-10	1.84154e-09	6.63954	5.304	4215	1408	15.1146	5.18346	10.8663	3.76159
368753	XM_021471387,XM_021473393	si:busm1-163l24.3	si:busm1-163l24.3	protein_coding	XP_021327062.1	ZDB-GENE-030616-179	-3.44899	3.6539	2.66708e-14	5.25249e-13	2.73192	4.35556	241	712	0.893192	2.72571	1.51347	4.34286
368848	NM_001003822,XM_021467121	g2e3	G2/M-phase specific E3 ubiquitin protein ligase	protein_coding	NP_001003822.1;XP_021322796.1	ZDB-GENE-030616-400	-4.3845	0.745268	3.20626e-09	3.26572e-08	0.686014	1.87975	26	98	0.121527	0.481737	0.205922	0.76755
368851	NM_001003823	coch	coagulation factor C homolog, cochlin (Limulus polyphemus)	protein_coding	NP_001003823.1	ZDB-GENE-030616-403	3.5795	6.21371	1.01985e-17	2.90264e-16	6.86928	5.06091	4950	1184	42.6121	10.4645	72.2039	16.673
368856	NM_001002341	cenpn	centromere protein N	protein_coding	NP_001002341.1	ZDB-GENE-030616-408	-2.07357	0.988907	0.00099895	0.00336067	1.17919	1.85814	54	96	0.520012	0.95539	0.881134	1.52222
368914	NM_001327763,XM_009307389	si:ch211-217g15.3	si:ch211-217g15.3	protein_coding	NP_001314692.1;XP_009305664.1	ZDB-GENE-030616-619	-2.32095	-0.966068	0.0324684	0.0690084	0.35727	0.728009	12	24	0.141591	0.299701	0.239918	0.477512
368924	NM_213149,XM_005166021,XM_009302537,XM_021476795	fkbp5	FK506 binding protein 5	protein_coding	NP_998314.1;XP_005166078.1;XP_009300812.1;XP_021332470.1	ZDB-GENE-030616-630	-2.89851	8.81949	2.32492e-13	4.06147e-12	7.86267	9.39392	9897	24563	58.6463	149.574	99.3732	238.315
369195	NM_194386	tgfb3	transforming growth factor, beta 3	protein_coding	NP_919367.2	ZDB-GENE-030723-4	2.02728	6.54872	1.10932e-06	7.21024e-06	6.98074	5.97284	5351	2260	41.275	17.9015	69.9382	28.5225
369197	NM_194387,NM_194387_dup1	stat5a	signal transducer and activator of transcription 5a	protein_coding	NP_919368.2	ZDB-GENE-030820-2	-4.05329	0.809795	1.16634e-08	1.08499e-07	0.747673	1.91156	29	101	0.158512	0.573462	0.268591	0.913695
373081	NM_201325,XM_005163803	mvp	major vault protein	protein_coding	NP_958482.1;XP_005163860.1	ZDB-GENE-030826-33	-2.02973	7.03738	9.52988e-07	6.29133e-06	6.45431	7.46726	3702	6434	18.2919	33.676	30.9947	53.6558
373087	NM_194390	znfl2a	zinc finger-like gene 2a	protein_coding	NP_919371.2	ZDB-GENE-030828-7	3.7243	1.37442	2.30104e-09	2.39593e-08	2.31639	1.04724	170	39	2.46767	0.572465	4.18134	0.912107
373102	NM_194394	mcl1b	MCL1, BCL2 family apoptosis regulator b	protein_coding	NP_919375.2	ZDB-GENE-030825-1	-2.06343	6.86597	5.53483e-07	3.85988e-06	6.26917	7.30457	3251	5744	49.6089	90.0009	84.0596	143.398
373110	NM_194397	birc5a	baculoviral IAP repeat containing 5a	protein_coding	NP_919378.1	ZDB-GENE-030826-1	-2.46507	2.54574	2.47817e-07	1.85757e-06	2.12054	3.21087	143	302	1.83173	3.98205	3.10376	6.34458
373121	NM_194402	mknk2b	MAP kinase interacting serine/threonine kinase 2b	protein_coding	NP_919383.1	ZDB-GENE-030829-2	-2.10066	6.23727	3.43304e-07	2.49416e-06	5.63333	6.68891	2077	3736	15.1945	28.0658	25.7463	44.7171
373136	NM_001118897	evpla	envoplakin a	protein_coding	NP_001112369.1	ZDB-GENE-030829-19	-7.13131	7.45995	7.23954e-38	8.45941e-36	5.46915	8.27513	1849	11291	3.80142	23.841	6.44131	37.9858
373874	NM_194411	ripk2	receptor-interacting serine-threonine kinase 2	protein_coding	NP_919392.2	ZDB-GENE-030902-3	-2.37508	0.0429207	0.00246665	0.00746812	0.664862	1.25987	25	51	0.223991	0.465071	0.37954	0.740996
373878	NM_194412,XM_017358715	ppp2r5eb	protein phosphatase 2, regulatory subunit B', epsilon isoform b	protein_coding	NP_919393.2;XP_017214204.1	ZDB-GENE-030904-6	-4.06764	5.73642	1.77846e-20	6.73988e-19	4.46128	6.43537	898	3128	7.51816	18.2956	12.7391	29.1503
373879	NM_194413,NM_194413_dup1,XM_021476027	p2rx5	purinergic receptor P2X, ligand-gated ion channel, 5	protein_coding	NP_919394.2;XP_021331702.1	ZDB-GENE-030319-5	12.955	-0.601791	3.64988e-08	3.12955e-07	1.07079	0.113759	47	3	0.309988	0.018886	0.525259	0.030092
373884	NM_001033717	cecr1a	cat eye syndrome chromosome region, candidate 1a	protein_coding	NP_001028889.2	ZDB-GENE-030902-4	2.04059	3.43186	9.46148e-06	5.09988e-05	3.94497	3.01003	615	258	3.83635	1.65466	6.50049	2.63637
378444	NM_194420,NM_194420_dup1,NM_194420_dup2	gjd2b	gap junction protein delta 2b	protein_coding	NP_919401.1	ZDB-GENE-030911-1	2.99082	1.09941	1.52402e-06	9.64342e-06	2.04069	1.02802	133	38	2.23644	0.656943	3.69268	0.903006
378452	NM_194422	cdh17	cadherin 17, LI cadherin (liver-intestine)	protein_coding	NP_919403.1	ZDB-GENE-030910-3	6.37756	0.576938	7.13952e-11	9.13972e-10	1.79025	0.467668	105	14	0.488352	0.062929	0.827487	0.100264
378458	XM_009305753,XM_009305754	rbms2a	RNA binding motif, single stranded interacting protein 2a, transcript variant X1	protein_coding	XP_009304028.1;XP_009304029.1	ZDB-GENE-030912-2	-2.54821	0.868768	5.0379e-05	0.000232526	1.00498	1.83621	43	94	0.313793	0.703167	0.531706	1.12035
378478	NM_194424	egfra	epidermal growth factor receptor a (erythroblastic leukemia viral (v-erb-b) oncogene homolog, avian)	protein_coding	NP_919405.1	ZDB-GENE-030918-1	-2.27594	4.63539	5.35577e-08	4.46307e-07	4.01351	5.14917	647	1261	1.62362	3.24967	2.75114	5.17769
378727	NM_214751,XM_021476798	pck1	phosphoenolpyruvate carboxykinase 1 (soluble)	protein_coding	NP_999916.1;XP_021332473.1	ZDB-GENE-030909-11	3.30639	1.85014	2.02299e-09	2.12217e-08	2.68542	1.40102	232	60	1.38588	0.363638	2.3483	0.579383
378847	NM_198072	mtr	5-methyltetrahydrofolate-homocysteine methyltransferase	protein_coding	NP_932338.1	ZDB-GENE-031001-5	-2.27515	4.52641	6.2126e-08	5.13437e-07	3.91169	5.04307	600	1169	2.15506	4.31097	3.65164	6.86865
378962	NM_200551	pah	phenylalanine hydroxylase	protein_coding	NP_956845.1	ZDB-GENE-031006-2	-7.18462	2.21204	2.06761e-22	9.13217e-21	1.08678	3.18507	48	296	0.341336	2.1888	0.578376	3.48741
386635	NM_001005320,XM_005165701,XM_005165702	erbb3a	erb-b2 receptor tyrosine kinase 3a	protein_coding	NP_001005320.1;XP_005165758.1;XP_005165759.1	ZDB-GENE-030916-3	-2.18757	5.21471	1.2822e-07	1.01006e-06	4.60147	5.69827	994	1862	2.06805	3.97807	3.50419	6.33823
386663	NM_198816,XM_005166025	pfkfb4b	6-phosphofructo-2-kinase/fructose-2,6-biphosphatase 4b	protein_coding	NP_942111.1;XP_005166082.1	ZDB-GENE-031031-4	-2.02828	5.86701	1.30768e-06	8.3932e-06	5.30453	6.30621	1645	2857	9.50896	16.6609	16.1124	26.5457
386701	NM_198818,XM_005173471	tubb5	tubulin, beta 5	protein_coding	NP_942113.1;XP_005173528.1	ZDB-GENE-031110-4	2.49738	6.84475	3.31821e-10	3.89682e-09	7.36682	6.0594	7006	2402	47.7944	16.8208	80.9851	26.8005
386710	NM_198877	mibp2	muscle-specific beta 1 integrin binding protein 2	protein_coding	NP_942578.1	ZDB-GENE-031113-14	-3.42234	8.79989	4.00283e-17	1.06035e-15	7.66211	9.43206	8607	25222	127.687	384.271	216.359	612.257
386723	NM_001008780,XM_005158200,XM_005158202,XM_005158203,XM_005158205,XM_009292528,XM_009292529,XM_009292530,XM_009292531	fli1b	Fli-1 proto-oncogene, ETS transcription factor b	protein_coding	NP_001008780.1;XP_005158257.1;XP_005158259.1;XP_005158260.1;XP_005158262.1;XP_009290803.1;XP_009290804.1;XP_009290805.1;XP_009290806.1	ZDB-GENE-031114-3	2.25549	2.41114	4.66637e-06	2.70082e-05	3.05008	2.07966	311	118	1.6512	0.630606	2.79787	1.00474
386801	NM_200113,XM_021478627	agps	alkylglycerone phosphate synthase	protein_coding	NP_956407.1;XP_021334302.1	ZDB-GENE-031118-14	-2.46838	2.20998	8.36434e-07	5.60193e-06	1.86635	2.91383	113	239	0.828014	1.84496	1.40303	2.93957
386817	XM_017356632,XM_017356633,XM_017356634,XM_017356636,XM_017356637,XM_017356638,XM_017356639,XM_021477152,XM_021477154	shroom2a	shroom family member 2a, transcript variant X1	protein_coding	XP_017212121.1;XP_017212122.1;XP_017212123.1;XP_017212125.1;XP_017212126.1;XP_017212127.1;XP_017212128.1;XP_021332827.1;XP_021332829.1	ZDB-GENE-050208-128	2.35018	6.50637	4.6082e-09	4.60011e-08	7.00514	5.78741	5443	1983	13.0117	4.94839	22.0476	7.88424
386856	NM_131459,NM_131459_dup1	pdgfra	platelet-derived growth factor receptor, alpha polypeptide	protein_coding	NP_571534.1	ZDB-GENE-990415-208	2.15641	2.13129	3.28551e-05	0.000158278	2.7868	1.90103	252	100	1.03861	0.423134	1.75987	0.674178
386937	XM_009291474,XM_009291475	dscamb	Down syndrome cell adhesion molecule b, transcript variant X2	protein_coding	XP_009289749.1;XP_009289750.1	ZDB-GENE-031118-67	2.51773	6.79243	2.38339e-10	2.85824e-09	7.31811	5.9996	6772	2303	13.0353	4.55054	22.0876	7.25035
386966	NM_200119,NM_200119_dup1	erbb2	erb-b2 receptor tyrosine kinase 2	protein_coding	NP_956413.2	ZDB-GENE-031118-121	-5.07803	1.37681	3.14517e-13	5.38262e-12	0.882056	2.40426	36	157	0.139283	0.627381	0.236008	0.999604
386994	NM_200123	rab11al	RAB11a, member RAS oncogene family, like	protein_coding	NP_956417.1	ZDB-GENE-031118-188	-4.86939	4.17831	1.08901e-22	4.9471e-21	2.83967	4.95423	263	1097	2.47902	10.6351	4.20057	16.9448
387000	NM_001039971	slc25a37	solute carrier family 25 (mitochondrial iron transporter), member 37	protein_coding	NP_001035060.1	ZDB-GENE-031118-202	-3.12232	-0.576979	0.00164801	0.00524871	0.383405	0.968776	13	35	0.038685	0.110371	0.065549	0.175853
387256	NM_198916,NM_198916_dup1	foxi2	forkhead box I2	protein_coding	NP_944598.2	ZDB-GENE-031126-2	2.46621	-0.904028	0.023845	0.0532637	0.747673	0.348776	29	10	0.334364	0.113363	0	0.144721
387261	NM_198922,XM_009306593	baiap2l1a	BAI1-associated protein 2-like 1a	protein_coding	NP_944604.1;XP_009304868.1	ZDB-GENE-031201-1	-2.93318	4.09758	6.5701e-12	9.62989e-11	3.27614	4.72729	371	932	2.22299	5.76657	3.76674	9.18785
387293	NM_001290479,XM_009305556	mmp13a	matrix metallopeptidase 13a	protein_coding	NP_001277408.1;XP_009303831.1	ZDB-GENE-031202-2	7.07378	0.886574	1.97897e-13	3.49192e-12	2.04069	0.52363	133	16	1.21602	0.149505	2.06047	0.238205
387365	NM_001305618,NM_001305618_dup1	gpc3	glypican 3	protein_coding	NP_001292547.1	ZDB-GENE-031212-1	5.25918	-1.63248	0.0024261	0.00736092	0.530986	0.113759	19	3	0.101328	0.013728	0.171694	0.021873
387526	NM_199215	ca2	carbonic anhydrase II	protein_coding	NP_954685.1	ZDB-GENE-031219-5	-2.45067	9.07022	5.15194e-10	5.88918e-09	8.28787	9.57832	13304	27917	48.3376	104.163	81.9054	165.963
387527	NM_199216,NM_199216_dup1,XM_005157851	cyp4t8	cytochrome P450, family 4, subfamily T, polypeptide 8	protein_coding	NP_954686.1	ZDB-GENE-031219-3	2.34635	1.70888	1.41398e-05	7.36146e-05	2.45838	1.54318	192	70	1.58869	0.588969	1.79067	0.645635
387529	NM_001030283,XM_005163870	ldlra	low density lipoprotein receptor a	protein_coding	NP_001025454.1;XP_005163927.1	ZDB-GENE-031217-1	-11.0658	4.72529	4.70518e-46	8.45847e-44	2.42731	5.62901	187	1773	0.582932	5.70382	0.987747	9.08787
387530	NM_199218	ahcy	adenosylhomocysteinase	protein_coding	NP_954688.1	ZDB-GENE-031219-6	-2.32938	7.36536	5.17043e-09	5.10802e-08	6.64427	7.85599	4229	8435	34.0755	69.8031	57.7392	111.217
387533	NM_207642,NM_207642_dup1,XM_005167541,XM_005167542,XM_021478628,XM_021478629	gja3	gap junction protein, alpha 3	protein_coding	NP_997525.1;XP_005167598.1;XP_005167599.1;XP_021334303.1;XP_021334304.1	ZDB-GENE-031217-3	-673.258	3.16477	8.57829e-77	5.01187e-74	0.0333936	4.23921	1	654	0.007932	3.69895	0.013441	3.64358
393096	NM_200128	lipg	lipase, endothelial	protein_coding	NP_956422.1	ZDB-GENE-040426-699	-2.8333	4.71401	8.35279e-12	1.20662e-10	3.87532	5.31296	584	1417	4.03508	10.0582	6.83723	16.0257
393098	NM_200130,XM_005172440,XM_017357291	ctu1	cytosolic thiouridylase subunit 1 homolog (S. pombe)	protein_coding	NP_956424.1;XP_005172497.3;XP_017212780.1	ZDB-GENE-040426-704	-2.468	1.68064	4.6154e-06	2.67426e-05	1.49902	2.46269	78	165	0.729426	1.64329	1.23597	2.61825
393108	NM_200139	cyp2p6	cytochrome P450, family 2, subfamily P, polypeptide 6	protein_coding	NP_956433.1	ZDB-GENE-040426-790	3.35769	3.11348	1.13721e-12	1.82448e-11	3.83091	2.30396	565	144	3.50126	0.911457	5.93269	1.45222
393114	NM_200145,NM_200145_dup1	zgc:55888	zgc:55888	protein_coding	NP_956439.2	ZDB-GENE-040426-834	-3.79012	3.29157	2.22916e-15	5.00917e-14	2.34326	4.04016	174	565	1.50636	5.03084	2.50848	7.90382
393125	NM_200156,XM_005169144	nup155	nucleoporin 155	protein_coding	NP_956450.1;XP_005169201.1	ZDB-GENE-040426-711	-2.14247	3.56671	1.67953e-06	1.05355e-05	3.0903	4.0966	321	589	1.12455	2.12715	1.90549	3.38918
393128	NM_200159	manba	mannosidase, beta A, lysosomal	protein_coding	NP_956453.1	ZDB-GENE-040426-721	-2.37108	1.90644	5.77724e-06	3.27792e-05	1.6786	2.63772	94	191	0.48805	1.01685	0.826976	1.62015
393136	NM_200167,NM_200167_dup1,NM_200167_dup2,XM_005162839,XM_005162840,XM_017353805	cpne3	copine III	protein_coding	NP_956461.1;XP_005162896.1;XP_005162897.1;XP_017209294.1	ZDB-GENE-040426-763	-3.84721	5.01709	1.68755e-18	5.23513e-17	3.84273	5.71038	570	1878	3.20723	11.0382	3.88314	13.3018
393147	NM_200178,NM_200178_dup1	acad11	acyl-CoA dehydrogenase family, member 11	protein_coding	NP_956472.1	ZDB-GENE-040426-814	-2.80268	0.754128	2.27007e-05	0.000113445	0.900271	1.77988	37	89	0.248584	0.618998	0.322638	0.842245
393150	NM_200181,XM_005163002,XM_009297893,XM_021470457	sh3gl3b	SH3-domain GRB2-like 3b	protein_coding	NP_956475.2;XP_005163059.1;XP_009296168.1;XP_021326132.1	ZDB-GENE-040121-4	4.717	2.15596	3.83459e-15	8.37518e-14	3.0419	1.33999	309	56	2.59755	0.398619	4.40141	0.635118
393162	NM_200193,XM_021468776	chek1	checkpoint kinase 1	protein_coding	NP_956487.1;XP_021324451.1	ZDB-GENE-040426-896	-2.14244	0.242637	0.00422381	0.0120021	0.787362	1.35549	31	57	0.25061	0.482022	0.424646	0.768003
393165	NM_001009895,NM_200196,XM_009305054,XM_009305056,XM_009305057,XM_021479114	pdlim5b	PDZ and LIM domain 5b	protein_coding	NP_001009895.1;NP_956490.1;XP_009303329.1;XP_009303331.1;XP_009303332.1;XP_021334789.1	ZDB-GENE-040426-908	-2.95743	6.11488	1.98427e-13	3.49833e-12	5.17024	6.7079	1495	3786	10.9842	27.9782	18.6121	44.5776
393166	NM_200197,XM_009300367,XM_021474968	tmem110l	transmembrane protein 110, like	protein_coding	NP_956491.1;XP_009298642.1;XP_021330643.1	ZDB-GENE-040426-912	2.24461	3.07168	1.16165e-06	7.52244e-06	3.64897	2.61857	493	188	2.49467	1.07218	4.22708	1.70831
393170	NM_200201	mitd1	MIT, microtubule interacting and transport, domain containing 1	protein_coding	NP_956495.1	ZDB-GENE-040426-923	-2.15802	1.98513	3.64417e-05	0.000173608	1.79998	2.66907	106	196	1.11161	2.12764	1.88357	3.38996
393175	NM_200206,XM_005171800,XM_009301453	erap1b	endoplasmic reticulum aminopeptidase 1b	protein_coding	NP_956500.2;XP_005171857.1;XP_009299728.1	ZDB-GENE-040426-934	-2.34629	4.89789	1.35786e-08	1.2477e-07	4.2324	5.4182	760	1527	3.43941	7.4882	5.82789	11.9309
393218	NM_200248,XR_002459561	polm	polymerase (DNA directed), mu	protein_coding	NP_956542.1	ZDB-GENE-040426-911	-2.55539	-0.58184	0.00931543	0.0239028	0.434294	0.927884	15	33	0.130947	0.298435	0.221883	0.475495
393226	NM_200256,XM_009294099	slc25a32a	solute carrier family 25 (mitochondrial folate carrier), member 32a	protein_coding	NP_956550.1;XP_009292374.1	ZDB-GENE-040426-758	2.04299	5.15044	1.47485e-06	9.36609e-06	5.60306	4.60291	2033	852	8.59604	3.69561	14.5655	5.8882
393229	NM_200259,XM_017356825,XM_017356826	rbpms2b	RNA binding protein with multiple splicing 2b	protein_coding	NP_956553.1;XP_017212314.1;XP_017212315.1	ZDB-GENE-040426-741	2.88128	6.47609	5.95041e-13	9.87806e-12	7.05604	5.54952	5640	1676	45.2182	14.0255	76.6199	22.3468
393230	NM_200260	ppp4r1	protein phosphatase 4, regulatory subunit 1	protein_coding	NP_956554.1	ZDB-GENE-040426-753	-11.6812	7.67376	5.81229e-55	1.47289e-52	5.05302	8.55897	1375	13754	7.11466	73.0906	12.0554	116.455
393234	NM_200264	nipsnap3a	nipsnap homolog 3A (C. elegans)	protein_coding	NP_956558.2	ZDB-GENE-040426-1037	-3.72813	1.88309	2.68736e-11	3.65846e-10	1.34795	2.75925	66	211	0.736372	2.43497	1.24774	3.87962
393242	NM_200272,XM_005171227,XM_017357919	zgc:56628	zgc:56628	protein_coding	NP_956566.1;XP_005171284.1;XP_017213408.1	ZDB-GENE-040426-1099	2.06415	0.0928607	0.0098652	0.0251353	1.23767	0.728009	58	24	0.684438	0.276433	1.15975	0.440439
393244	NM_200274	ankrd22	ankyrin repeat domain 22	protein_coding	NP_956568.1	ZDB-GENE-040426-1120	-2.17842	3.64444	8.90317e-07	5.93159e-06	3.14479	4.17732	335	625	5.34039	10.2488	9.049	16.3293
393247	NM_200277,XM_009291955	naalad2	N-acetylated alpha-linked acidic dipeptidase 2	protein_coding	NP_956571.1;XP_009290230.2	ZDB-GENE-040426-1025	3.26366	1.83594	3.25537e-09	3.31254e-08	2.66957	1.40102	229	60	1.47519	0.394933	2.49962	0.629244
393264	NM_200294,NM_200294_dup1	uap1l1	UDP-N-acetylglucosamine pyrophosphorylase 1, like 1	protein_coding	NP_956588.1	ZDB-GENE-040426-1056	-2.68175	2.77555	9.04287e-09	8.56751e-08	2.23261	3.44987	158	363	1.3772	3.2649	0.89404	5.20195
393268	NM_200298	map1lc3c	microtubule-associated protein 1 light chain 3 gamma	protein_coding	NP_956592.1	ZDB-GENE-040426-1080	-2.78688	-0.497955	0.00377845	0.0108717	0.434294	0.988796	15	36	0.283906	0.697472	0.481064	1.11128
393280	NM_200310,XM_005155671	nuf2	NUF2, NDC80 kinetochore complex component, homolog	protein_coding	NP_956604.1;XP_005155728.1	ZDB-GENE-040426-1121	-2.01688	1.53708	0.000410601	0.00153042	1.53443	2.27164	81	140	0.794563	1.40833	1.34634	2.24388
393282	NM_200312	snu13a	SNU13 homolog, small nuclear ribonucleoprotein a (U4/U6.U5)	protein_coding	NP_956606.1	ZDB-GENE-040426-879	-2.23813	3.04709	1.2391e-06	7.97978e-06	2.60441	3.62956	217	416	1.82865	3.59915	3.09856	5.7345
393311	NM_200340,NM_200340_dup1	plekhf1	pleckstrin homology domain containing, family F (with FYVE domain) member 1	protein_coding	NP_956634.1	ZDB-GENE-040426-1289	2.03617	2.75459	3.23783e-05	0.000156339	3.31739	2.43377	383	161	4.87927	2.10683	8.21912	3.3568
393318	NM_200347,NM_200347_dup1,XM_005158499	tmem54a	transmembrane protein 54a	protein_coding	NP_956641.1;XP_005158556.1	ZDB-GENE-040426-1304	-2.09709	4.00272	1.72663e-06	1.07987e-05	3.50166	4.50205	441	792	5.64469	10.3605	8.41886	15.8607
393332	NM_001328079,XM_005167020	eps8l3b	EPS8-like 3b	protein_coding	NP_001315008.1;XP_005167077.1	ZDB-GENE-040426-1335	2.91231	2.6252	1.47372e-09	1.58391e-08	3.33423	2.04183	388	114	2.27498	0.745601	3.85484	1.18796
393334	NM_200363	rassf8b	Ras association (RalGDS/AF-6) domain family (N-terminal) member 8b	protein_coding	NP_956657.1	ZDB-GENE-040426-1338	-4.3665	2.9679	3.29877e-17	8.8725e-16	1.96483	3.77499	124	464	1.13528	4.36007	1.92367	6.94688
393338	NM_200367,XM_017356451	abhd14b	abhydrolase domain containing 14B	protein_coding	NP_956661.1;XP_017211940.1	ZDB-GENE-040426-1342	-2.05877	2.19794	7.21241e-05	0.000321531	1.99056	2.83308	127	224	0.854275	1.45561	1.44752	2.31922
393341	NM_200370	tmem254	transmembrane protein 254	protein_coding	NP_956664.1	ZDB-GENE-040426-1348	-2.18553	3.54536	9.58221e-07	6.31993e-06	3.05415	4.08502	312	584	2.79706	5.37728	4.73947	8.5676
393345	NM_200374	tnfaip8l2b	tumor necrosis factor, alpha-induced protein 8-like 2b	protein_coding	NP_956668.1	ZDB-GENE-040426-1359	-2.29041	3.47177	2.30784e-07	1.73982e-06	2.94871	4.03535	287	563	3.31963	6.69415	5.62494	10.6658
393355	NM_200384,NM_200384_dup1,NM_200384_dup2,XM_005166179	mif4gda	MIF4G domain containing a	protein_coding	NP_956678.1	ZDB-GENE-040426-1382	2.97224	1.29822	4.56136e-07	3.22701e-06	2.19621	1.13967	153	44	1.61002	0.516447	1.28833	0.526191
393360	NM_200389	stn1	STN1, CST complex subunit	protein_coding	NP_956683.1	ZDB-GENE-040426-1390	-2.046	2.8567	2.11292e-05	0.000106344	2.51858	3.417	202	354	2.11932	3.82539	3.59108	6.09497
393365	NM_200394,NM_200394_dup1,XM_021476036	mtmr8	myotubularin related protein 8	protein_coding	NP_956688.1	ZDB-GENE-040426-1016	2.64764	1.07858	1.7037e-05	8.73358e-05	1.99056	1.08493	127	41	0.840142	0.279198	1.42358	0.32078
393368	NM_200397,NM_200397_dup1,NM_200397_dup2	zmynd10	zinc finger, MYND-type containing 10	protein_coding	NP_956691.1	ZDB-GENE-040426-1218	3.46895	-0.215115	0.000159262	0.000656173	1.1642	0.438851	53	13	0.548873	0.134718	0.664327	0
393371	NM_200400,NM_200400_dup1,XM_005158564,XM_005158565	dnajc5gb	DnaJ (Hsp40) homolog, subfamily C, member 5 gamma b	protein_coding	NP_956694.1	ZDB-GENE-040426-1238	-2.31813	3.73176	9.83482e-08	7.86823e-07	3.16753	4.28648	341	677	2.46232	5.43108	2.9076	5.85384
393376	NM_200405,XM_005157571,XM_005157572,XM_021481358	hif1al	hypoxia-inducible factor 1, alpha subunit, like	protein_coding	NP_956699.1;XP_005157628.2;XP_005157629.2;XP_021337033.1	ZDB-GENE-040426-1315	-2.84191	6.98225	8.82185e-13	1.436e-11	6.06179	7.55463	2810	6838	13.7276	34.1591	23.2608	54.4256
393380	NM_200408	tspan35	tetraspanin 35	protein_coding	NP_956702.2	ZDB-GENE-040426-1362	-2.64914	3.15756	3.76411e-09	3.80994e-08	2.55352	3.79787	208	472	1.89423	4.424	3.20967	7.04874
393386	NM_200414	cybb	cytochrome b-245, beta polypeptide (chronic granulomatous disease)	protein_coding	NP_956708.1	ZDB-GENE-040426-1380	3.14799	3.31358	6.14686e-12	9.07277e-11	3.9988	2.52571	640	174	2.83408	0.790051	4.8022	1.25879
393387	NM_200415,XM_017357293	ggt1a	gamma-glutamyltransferase 1a	protein_coding	NP_956709.1;XP_017212782.1	ZDB-GENE-040426-1388	-29.0142	3.25521	1.26607e-55	3.45835e-53	0.706862	4.2804	27	674	0.09916	2.5772	0.168022	4.10623
393395	NM_200423,NM_200423_dup1,XM_005170443	aes	amino-terminal enhancer of split	protein_coding	NP_956717.1;XP_005170500.1	ZDB-GENE-040426-1409	-2.44745	1.32274	2.54535e-05	0.00012582	1.28002	2.1701	61	128	0.518381	1.06569	0.348834	1.10947
393409	NM_200437	tmem185	transmembrane protein 185	protein_coding	NP_956731.1	ZDB-GENE-040426-1167	-2.14439	3.21404	2.83921e-06	1.71256e-05	2.7819	3.76632	251	461	1.56197	2.94835	2.64668	4.69759
393416	NM_200444,XM_005162155	arhgap4a	Rho GTPase activating protein 4a	protein_coding	NP_956738.1;XP_005162212.1	ZDB-GENE-040426-1229	-4.69865	3.36557	8.14401e-20	2.88858e-18	2.20357	4.16637	154	620	0.741988	3.30133	1.25726	5.25999
393421	NM_200449,XR_002459129	etnppl	ethanolamine-phosphate phospho-lyase	protein_coding	NP_956743.1	ZDB-GENE-040426-1133	3.03142	0.0820974	0.000152688	0.000632805	1.32116	0.577503	64	18	0.570634	0.161395	0.96691	0.25715
393423	NM_200451,XM_005161293	asl	argininosuccinate lyase	protein_coding	NP_956745.1;XP_005161350.1	ZDB-GENE-040426-1152	-2.49299	4.60219	1.85845e-09	1.9692e-08	3.89589	5.15472	593	1266	5.11776	11.2306	8.67178	17.8936
393432	NM_200460	pcolce2b	procollagen C-endopeptidase enhancer 2b	protein_coding	NP_956754.1	ZDB-GENE-040426-1177	2.19527	3.73391	6.92581e-07	4.72343e-06	4.26264	3.21513	777	303	6.76133	2.70519	11.4567	4.31016
393433	NM_200461,XM_009294540	cyp46a1.2	cytochrome P450, family 46, subfamily A, polypeptide 1, tandem duplicate 2	protein_coding	NP_956755.1;XP_009292815.1	ZDB-GENE-040426-1184	2.00508	2.57049	5.9995e-05	0.000272897	3.14479	2.29595	335	143	2.38252	1.04336	4.03705	1.66238
393442	NM_200470,XM_009298567	crispld1b	cysteine-rich secretory protein LCCL domain containing 1b	protein_coding	NP_956764.1;XP_009296842.1	ZDB-GENE-040426-1204	-10.5054	1.45019	3.62018e-22	1.58632e-20	0.554179	2.57289	20	181	0.122807	1.15387	0.208091	1.83846
393451	NM_200479,XM_005160347	cyp46a1.4	cytochrome P450, family 46, subfamily A, polypeptide 1, tandem duplicate 4	protein_coding	NP_956773.1;XP_005160404.1	ZDB-GENE-040426-1224	3.12828	1.44554	9.98487e-08	7.97008e-07	2.32989	1.19242	172	47	0.888399	0.246133	1.50534	0.392163
393452	NM_200480,NM_200480_dup1	dync2li1	dynein, cytoplasmic 2, light intermediate chain 1	protein_coding	NP_956774.1	ZDB-GENE-040426-1230	2.00021	1.63177	0.000521271	0.00188642	2.33659	1.59634	173	74	1.86129	0.810625	3.15385	1.29157
393453	XM_005166460	znf507	zinc finger protein 507	protein_coding	XP_005166517.1	ZDB-GENE-040426-1233	-4.6339	-0.155072	3.24674e-06	1.93179e-05	0.383405	1.27626	13	52	0.045537	0.190051	0.07716	0.302807
393462	NM_200490	aldh2.1	aldehyde dehydrogenase 2 family (mitochondrial), tandem duplicate 1	protein_coding	NP_956784.1	ZDB-GENE-040426-1262	2.05353	4.53067	2.13646e-06	1.31392e-05	5.00016	4.00864	1324	552	10.6662	4.56403	18.0733	7.27185
393466	XM_021470556	nrcamb	neuronal cell adhesion molecule b	protein_coding	XP_021326231.1	ZDB-GENE-040426-1542	-2.38736	3.74017	3.77325e-08	3.22875e-07	3.14861	4.30656	336	687	5.13746	10.7805	8.70516	17.1765
393486	NM_200514,XM_005172064	lgals2b	lectin, galactoside-binding, soluble, 2b	protein_coding	NP_956808.1;XP_005172121.1	ZDB-GENE-040426-1590	3.7584	3.2789	5.97804e-15	1.28041e-13	4.01978	2.33557	650	148	17.303	4.03205	29.319	6.42425
393488	NM_200516	myl13	myosin, light chain 13	protein_coding	NP_956810.1	ZDB-GENE-040426-1593	2.07945	3.6129	3.92104e-06	2.3011e-05	4.1242	3.15438	702	289	12.9266	5.45562	21.9035	8.69242
393502	NM_200530	zgc:66455	zgc:66455	protein_coding	NP_956824.1	ZDB-GENE-040426-1642	-6.30431	-0.841934	8.72276e-06	4.74563e-05	0.189666	0.927884	6	33	0.038162	0.240375	0.064663	0.382989
393507	NM_200535,NM_200535_dup1	stk17b	serine/threonine kinase 17b (apoptosis-inducing)	protein_coding	NP_956829.1	ZDB-GENE-040426-1499	-2.59576	2.05775	3.88958e-07	2.79118e-06	1.7202	2.79947	98	218	0.962538	2.19871	1.63097	3.5032
393517	NM_200545	nkain1	sodium/potassium transporting ATPase interacting 1	protein_coding	NP_956839.1	ZDB-GENE-040426-1472	2.3443	4.14728	3.82422e-08	3.26971e-07	4.68658	3.53061	1057	386	9.40362	3.51981	15.9339	5.60809
393519	NM_200547	purbb	purine-rich element binding protein Bb	protein_coding	NP_956841.1	ZDB-GENE-040426-1478	-2.3219	1.93038	8.32754e-06	4.55772e-05	1.70991	2.65034	97	193	0.845883	1.73557	1.43331	2.76528
393521	NM_200549,XM_017358720	macrod2	MACRO domain containing 2	protein_coding	NP_956843.1;XP_017214209.1	ZDB-GENE-040426-1490	-2.13389	5.88452	2.21969e-07	1.6818e-06	5.27342	6.34701	1609	2940	8.92175	17.2153	15.1174	27.429
393524	NM_200552	zgc:65811	zgc:65811	protein_coding	NP_956846.1	ZDB-GENE-040426-1428	-2.07323	5.22312	8.33113e-07	5.58586e-06	4.6601	5.68223	1037	1841	23.8793	43.5548	40.4622	69.3956
393530	NM_001331200,NM_200558,XM_017353529,XM_017353530	mybpha	myosin binding protein Ha	protein_coding	NP_001318129.1;NP_956852.2;XP_017209018.1;XP_017209019.1	ZDB-GENE-040426-1531	4.67906	0.214343	2.79526e-07	2.07308e-06	1.48701	0.467668	77	14	0.499786	0.091138	0.846861	0.14521
393533	NM_200561	fzd6	frizzled class receptor 6	protein_coding	NP_956855.1	ZDB-GENE-040426-1451	-2.70616	3.80373	3.4917e-10	4.07779e-09	3.0903	4.41596	321	744	1.6354	3.89393	2.7711	6.20419
393534	NM_200562,XM_005163934,XM_009299441	carhsp1	calcium regulated heat stable protein 1	protein_coding	NP_956856.2;XP_005163991.1;XP_009297716.1	ZDB-GENE-040426-1479	-12.0903	7.73832	3.05647e-56	8.6874e-54	5.07122	8.62722	1393	14422	21.7418	244.815	36.8403	390.063
393537	NM_200565	ccdc124	coiled-coil domain containing 124	protein_coding	NP_956859.1	ZDB-GENE-040426-1483	-2.529	7.09375	1.75101e-10	2.13873e-09	6.29264	7.62007	3305	7157	36.2744	80.6772	61.465	128.543
393548	NM_200576	gadd45aa	growth arrest and DNA-damage-inducible, alpha, a	protein_coding	NP_956870.2	ZDB-GENE-040426-1501	-2.50347	3.83496	5.91656e-09	5.77462e-08	3.18992	4.41596	347	744	4.36009	9.61305	7.38794	15.3164
393554	NM_200582,XM_005170125,XM_017351326	trip13	thyroid hormone receptor interactor 13	protein_coding	NP_956876.1;XP_005170182.1;XP_017206815.1	ZDB-GENE-040426-1488	-5.3968	1.3258	8.40771e-14	1.56357e-12	0.825989	2.37413	33	153	0.293568	1.43605	0.497435	2.28805
393556	NM_200584,NM_200584_dup1	gstt1b	glutathione S-transferase theta 1b	protein_coding	NP_956878.1	ZDB-GENE-040426-1491	2.87036	2.55882	3.17786e-09	3.23994e-08	3.26914	2.00298	369	110	4.56983	1.39469	7.74334	2.22215
393558	NM_200586,XM_005160167,XM_005160168	mb	myoglobin	protein_coding	NP_956880.1;XP_005160224.1;XP_005160225.1	ZDB-GENE-040426-1430	2.30739	5.61875	1.43245e-08	1.31337e-07	6.11832	4.93888	2924	1085	30.7155	11.8794	52.0458	18.9275
393561	NM_200589,NM_200589_dup1	abcc2	ATP-binding cassette, sub-family C (CFTR/MRP), member 2	protein_coding	NP_956883.2	ZDB-GENE-040426-1523	2.95235	2.17069	9.20296e-09	8.69959e-08	2.9311	1.69712	283	82	0.891874	0.265071	0.510741	0.074151
393566	NM_200594	pym1	PYM homolog 1, exon junction complex associated factor	protein_coding	NP_956888.2	ZDB-GENE-040426-1464	2.08543	4.37719	1.49208e-06	9.46694e-06	4.8583	3.85079	1196	491	13.7849	5.81459	23.3578	9.26435
393570	NM_200598	irf6	interferon regulatory factor 6	protein_coding	NP_956892.1	ZDB-GENE-040426-1137	-2.54902	3.32328	9.69382e-09	9.12788e-08	2.72683	3.93832	240	524	1.36204	3.0493	2.30791	4.85844
393586	NM_200614	hsc70	heat shock cognate 70	protein_coding	NP_956908.1	ZDB-GENE-040426-1221	-22.1034	7.71395	1.38546e-77	8.5707e-75	4.26088	8.65361	776	14689	4.87894	94.9343	8.26711	151.258
393587	NM_200615	lrfn1	leucine rich repeat and fibronectin type III domain containing 1	protein_coding	NP_956909.1	ZDB-GENE-040426-1227	6.59965	-0.518571	1.79919e-06	1.12226e-05	1.07079	0.2192	47	6	0.34753	0.043989	0.588871	0.070088
393591	NM_200619	zgc:63733	zgc:63733	protein_coding	NP_956913.2	ZDB-GENE-040426-1249	-2.37265	2.87637	3.05747e-07	2.24695e-06	2.4147	3.49606	185	376	1.08366	2.27216	1.8362	3.62023
393606	NM_200633	kcnk5b	potassium channel, subfamily K, member 5b	protein_coding	NP_956927.1	ZDB-GENE-040426-1297	-3.0274	0.539973	1.06852e-05	5.694e-05	0.767654	1.64761	30	78	0.182597	0.492398	0.309402	0.784536
393608	NM_200635	ptger2a	prostaglandin E receptor 2a (subtype EP2)	protein_coding	NP_956929.1	ZDB-GENE-040426-1321	-5.25612	0.360263	4.67846e-09	4.65919e-08	0.48345	1.63496	17	77	0.114983	0.536506	0.194832	0.854812
393609	NM_200636,NM_200636_dup1	myo1eb	myosin IE, b	protein_coding	NP_956930.1	ZDB-GENE-040426-1347	-3.24337	4.30072	4.61276e-14	8.85221e-13	3.36078	4.95804	396	1100	1.5273	4.35809	2.26365	6.24227
393640	NM_200667,NM_200667_dup1	sypl2a	synaptophysin-like 2a	protein_coding	NP_956961.2	ZDB-GENE-040426-1434	-3.01235	4.11847	1.94369e-12	3.03068e-11	3.26914	4.75677	369	952	1.225	3.24664	2.0757	5.17285
393650	NM_001313779,NM_200677	irf7	interferon regulatory factor 7	protein_coding	NP_001300708.1;NP_956971.2	ZDB-GENE-040426-1518	-2.21212	4.41951	1.84814e-07	1.4161e-06	3.83801	4.92725	568	1076	5.15629	10.0363	8.73706	15.9908
393657	NM_200684	zgc:66024	zgc:66024	protein_coding	NP_956978.2	ZDB-GENE-040426-1511	2.77549	0.596531	5.85243e-05	0.000266784	1.64658	0.820276	91	28	0.927202	0.286706	1.57109	0.456808
393664	NM_200691	tuba8l2	tubulin, alpha 8 like 2	protein_coding	NP_956985.1	ZDB-GENE-040426-1646	-2.43379	7.29972	8.60377e-10	9.55959e-09	6.53522	7.80926	3918	8165	37.7388	80.762	63.9465	128.678
393684	NM_200711	calb2b	calbindin 2b	protein_coding	NP_957005.1	ZDB-GENE-040426-1668	2.1397	5.52906	2.44938e-07	1.83796e-06	5.99662	4.92466	2684	1074	31.9254	13.1189	54.096	20.9022
393691	NM_200718,NM_200718_dup1	calb2a	calbindin 2a	protein_coding	NP_957012.1	ZDB-GENE-040426-1677	2.23444	4.85097	9.08114e-08	7.32376e-07	5.34996	4.23293	1699	651	19.2738	7.57537	17.1863	6.53477
393711	NM_001328427,XM_005162489,XM_005162496,XM_005162498,XM_005162499,XM_009297227,XM_009297228,XM_009297229	abi1a	abl-interactor 1a	protein_coding	NP_001315356.1;XP_005162546.1;XP_005162553.1;XP_005162555.1;XP_005162556.1;XP_009295502.1;XP_009295503.1;XP_009295504.1	ZDB-GENE-040426-1701	-2.22981	4.82971	9.59131e-08	7.69977e-07	4.21614	5.32973	751	1434	5.35567	10.1985	9.07491	16.2492
393714	NM_200741	cdo1	cysteine dioxygenase, type I	protein_coding	NP_957035.2	ZDB-GENE-040426-1704	2.65896	7.42906	1.77077e-11	2.4698e-10	7.97367	6.57227	10692	3443	150.406	49.7311	254.854	79.2363
393724	NM_200751	rpe65a	retinal pigment epithelium-specific protein 65a	protein_coding	NP_957045.1	ZDB-GENE-040426-1717	2.40894	6.32717	1.81349e-09	1.92351e-08	6.83773	5.58694	4842	1721	43.9089	16.0181	74.4013	25.5215
393733	NM_200760,NM_200760_dup1,NM_200760_dup2	fgf1a	fibroblast growth factor 1a	protein_coding	NP_957054.1	ZDB-GENE-040426-1729	2.61065	-0.229035	0.00277865	0.00830042	1.1026	0.52363	49	16	0.440164	0.144578	0.175307	0.053777
393761	NM_200788	rdh8b	retinol dehydrogenase 8b	protein_coding	NP_957082.2	ZDB-GENE-040426-1759	2.39751	4.80681	7.19803e-09	6.91938e-08	5.33665	4.12401	1683	601	12.4772	4.57196	21.142	7.28448
393776	NM_200803	cox4i2	cytochrome c oxidase subunit IV isoform 2	protein_coding	NP_957097.1	ZDB-GENE-040426-1775	2.10715	7.67276	2.32951e-07	1.75489e-06	8.11722	7.04764	11815	4801	213.521	89.0923	361.8	141.95
393794	NM_200821,XM_021468018	tfap2e	transcription factor AP-2 epsilon	protein_coding	NP_957115.2;XP_021323693.1	ZDB-GENE-040426-1455	2.0032	4.80682	3.68681e-06	2.17639e-05	5.25761	4.29253	1591	680	14.3587	6.30657	24.3301	10.0482
393796	NM_200823	kif4	kinesin family member 4	protein_coding	NP_957117.1	ZDB-GENE-040426-1545	-2.25234	2.13094	1.0308e-05	5.51252e-05	1.87558	2.81076	114	220	0.318723	0.633212	0.540059	1.00889
393813	NM_200840	pdlim7	PDZ and LIM domain 7	protein_coding	NP_957134.1	ZDB-GENE-040426-2092	-2.33321	1.47055	3.5746e-05	0.000170564	1.40008	2.27164	70	140	0.369831	0.766282	0.626659	1.22091
393814	NM_200841	plek	pleckstrin	protein_coding	NP_957135.1	ZDB-GENE-040426-1506	2.00441	1.55522	0.000563794	0.0020236	2.27511	1.54318	164	70	1.3283	0.577274	2.25073	0.919768
393819	NM_200846	arl5c	ADP-ribosylation factor-like 5C	protein_coding	NP_957140.1	ZDB-GENE-040426-1866	-2.25303	3.21028	7.11617e-07	4.84854e-06	2.737	3.78362	242	467	2.89207	5.72542	4.90046	9.12229
393832	NM_200858,XM_009299220	zgc:77748	zgc:77748	protein_coding	NP_957152.1;XP_009297495.1	ZDB-GENE-040426-1864	6.68605	-1.02209	8.2223e-05	0.000362101	0.806805	0.149769	32	4	0.291093	0.033381	0.493242	0.053186
393836	NM_200862,NM_200862_dup1	stx11b.1	syntaxin 11b, tandem duplicate 1	protein_coding	NP_957156.1	ZDB-GENE-040426-1893	-2.36024	1.80777	1.01796e-05	5.44803e-05	1.61385	2.55286	88	178	0.894974	1.85368	1.51649	2.68411
393837	NM_200863	c8g	complement component 8, gamma polypeptide	protein_coding	NP_957157.1	ZDB-GENE-040426-1898	-6.7909	-0.212919	4.26378e-08	3.60886e-07	0.275901	1.29245	9	53	0.09352	0.622209	0.158465	0.991364
393838	NM_200864,XM_009303728,XM_021478218,XM_021478219	mtmr3	myotubularin related protein 3	protein_coding	NP_957158.2;XP_009302003.1;XP_021333893.1;XP_021333894.1	ZDB-GENE-091204-465	-8.30103	5.80188	1.31802e-40	1.78851e-38	3.69925	6.65172	512	3640	1.42725	11.9993	2.41839	19.1184
393843	NM_200869,XM_005161625,XM_005161626,XM_005161627	dnase1l4.2	deoxyribonuclease 1 like 4, tandem duplicate 2	protein_coding	NP_957163.1;XP_005161682.1;XP_005161683.1;XP_005161684.1	ZDB-GENE-040426-1884	2.46217	2.23482	9.57292e-07	6.31578e-06	2.92666	1.87975	282	98	2.43189	0.873861	4.1207	1.39232
393848	NM_200874,NM_200874_dup1,XM_009306595,XM_021480040,XM_021480041,XM_021480042,XM_021480043,XM_021480044	arhgap12b	Rho GTPase activating protein 12b	protein_coding	NP_957168.1	ZDB-GENE-040426-1727	-2.49781	7.52034	2.72239e-10	3.22852e-09	6.72729	8.03979	4482	9586	16.0118	34.9419	27.1311	37.4306
393849	NM_200875,XM_009306492	myof	myoferlin	protein_coding	NP_957169.2;XP_009304767.1	ZDB-GENE-040426-1138	-2.29141	6.29104	1.3195e-08	1.21404e-07	5.60167	6.78112	2031	3985	4.72231	9.57416	8.0017	15.2545
393850	NM_200876	dhx38	DEAH (Asp-Glu-Ala-His) box polypeptide 38	protein_coding	NP_957170.1	ZDB-GENE-040426-1144	-3.12764	2.60316	1.04165e-10	1.30878e-09	1.97346	3.34505	125	335	0.425993	1.17503	0.721823	1.87217
393851	NM_200877,XM_021468019	klhl7	kelch-like family member 7	protein_coding	NP_957171.1;XP_021323694.1	ZDB-GENE-130212-1	-2.52084	1.37555	1.07953e-05	5.74394e-05	1.29386	2.22176	62	134	0.376095	0.846846	0.637273	1.34928
393867	NM_200893,XM_017357297,XM_017357298,XM_017357299,XM_017357300	ampd1	adenosine monophosphate deaminase 1 (isoform M)	protein_coding	NP_957187.1;XP_017212786.1;XP_017212787.1;XP_017212788.1;XP_017212789.1	ZDB-GENE-040426-1906	3.82077	4.49543	1.27128e-17	3.59875e-16	5.19535	3.36816	1522	341	9.4952	2.18103	16.0891	3.47502
393868	NM_200894,XM_009304092,XM_021472110,XM_021472111	zgc:77614	zgc:77614, transcript variant X2	protein_coding	XP_021327785.1;XP_021327786.1	ZDB-GENE-040426-1844	2.65823	-0.129434	0.00196109	0.0060981	1.1642	0.550818	53	17	0.760273	0.266314	1.28824	0.424318
393871	NM_200897	csrp2	cysteine and glycine-rich protein 2	protein_coding	NP_957191.1	ZDB-GENE-040426-1863	-2.02491	4.36074	3.60689e-06	2.1322e-05	3.86376	4.83073	579	1004	10.0825	17.9562	17.0843	28.6095
393877	NM_200903,NM_200903_dup1	derl3	derlin 3	protein_coding	NP_957197.2	ZDB-GENE-040426-1324	-4.65584	3.57913	3.04277e-20	1.12674e-18	2.38267	4.36708	180	718	1.58879	6.53486	1.5332	4.52346
393891	NM_200917	fbxo32	F-box protein 32	protein_coding	NP_957211.1	ZDB-GENE-040426-1040	-2.06649	2.54104	2.89056e-05	0.000141421	2.25401	3.13655	161	285	1.42055	2.58227	2.40704	4.11432
393894	NM_001328435,NM_200920	pitpnb	phosphatidylinositol transfer protein, beta	protein_coding	NP_001315364.1;NP_957214.2	ZDB-GENE-040426-895	-2.14777	3.46706	1.88613e-06	1.17405e-05	3.00028	4.00373	299	550	1.66122	3.15318	2.81484	5.02394
393906	NM_200932	nt5e	5'-nucleotidase, ecto (CD73)	protein_coding	NP_957226.1	ZDB-GENE-040426-1261	-3.08752	2.76195	8.31196e-11	1.05571e-09	2.10492	3.48553	141	373	1.03187	2.81501	1.74844	4.48514
393910	NM_200936,NM_200936_dup1,XM_005169269,XM_005169270,XM_021479565,XM_021479566	sulf2a	sulfatase 2a	protein_coding	NP_957230.1	ZDB-GENE-040426-759	2.68696	2.44992	4.11356e-08	3.4986e-07	3.14861	1.97315	336	107	1.35282	0.441132	1.56878	0.507343
393930	NM_200955	bhlhe22	basic helix-loop-helix family, member e22	protein_coding	NP_957249.2	ZDB-GENE-040426-1411	2.00792	6.30967	1.63246e-06	1.02647e-05	6.73904	5.74684	4519	1927	39.1173	17.1256	66.2823	27.2862
393932	NM_001320529	slc15a4	solute carrier family 15 (oligopeptide transporter), member 4	protein_coding	NP_001307458.1	ZDB-GENE-040426-1047	-3.24261	0.51589	4.64491e-06	2.68914e-05	0.727412	1.64761	28	78	0.142364	0.410412	0.241229	0.653907
393944	NM_200969	sncb	synuclein, beta	protein_coding	NP_957263.1	ZDB-GENE-040426-1615	2.28189	4.97436	3.88684e-08	3.31786e-07	5.47979	4.33029	1863	699	54.2396	20.8819	91.9062	33.271
393959	NM_200984,NM_200984_dup1	foxl1	forkhead box L1	protein_coding	NP_957278.1	ZDB-GENE-040426-1181	2.52903	0.399745	0.000508818	0.00184803	1.48701	0.77488	77	26	0.632887	0.221353	1.07239	0.352681
393961	NM_200986	tcea2	transcription elongation factor A (SII), 2	protein_coding	NP_957280.2	ZDB-GENE-040426-985	-2.11012	4.82438	6.40042e-07	4.39217e-06	4.26264	5.3	777	1404	6.94902	12.905	11.7747	20.5615
393975	NM_201000	bag2	BCL2-associated athanogene 2	protein_coding	NP_957294.2	ZDB-GENE-040426-1399	-54.387	1.74172	5.57231e-40	7.41787e-38	0.159737	2.91383	5	239	0.089205	4.38966	0.151154	6.99403
393995	NM_201020	gpc1b	glypican 1b	protein_coding	NP_957314.1	ZDB-GENE-040426-1306	-4.5639	4.05122	5.38989e-21	2.11503e-19	2.79656	4.8154	254	993	1.61777	6.49711	2.74123	10.3518
393997	NM_201022	lipca	lipase, hepatic a	protein_coding	NP_957316.1	ZDB-GENE-040426-1361	3.50603	-1.01369	0.00401524	0.0114839	0.747673	0.252701	29	7	0.265748	0.058461	0.450296	0.093145
394003	NM_201028,XM_017358211	cpne5b	copine Vb	protein_coding	NP_957322.1;XP_017213700.1	ZDB-GENE-040426-1398	3.93933	-1.0886	0.00282728	0.00843013	0.727412	0.2192	28	6	0.136968	0.027828	0.232085	0.044338
394005	NM_201030,XM_005157058	prkg1a	protein kinase, cGMP-dependent, type Ia	protein_coding	NP_957324.1;XP_005157115.1	ZDB-GENE-040426-1308	2.23872	-0.3782	0.0181302	0.0421594	0.988048	0.52363	42	16	0.197994	0.078964	0.335491	0.125813
394012	NM_001324498,XM_021480544	itga9	integrin, alpha 9	protein_coding	NP_001311427.1;XP_021336219.1	ZDB-GENE-040426-1129	2.43492	2.75221	2.67574e-07	1.99429e-06	3.38686	2.28789	404	142	0.813415	0.295308	1.37829	0.470512
394021	NM_201046	shmt1	serine hydroxymethyltransferase 1 (soluble)	protein_coding	NP_957340.1	ZDB-GENE-040426-1558	-2.11255	4.82179	6.10554e-07	4.21319e-06	4.25911	5.29799	775	1402	6.75215	12.5519	11.4412	19.9988
394023	NM_001320534	pdia2	protein disulfide isomerase family A, member 2	protein_coding	NP_001307463.1	ZDB-GENE-040426-705	3.38569	-1.04925	0.00582377	0.0158997	0.727412	0.252701	28	7	0.233806	0.052893	0.396172	0.084274
394025	NM_201050	nek2	NIMA-related kinase 2	protein_coding	NP_957344.1	ZDB-GENE-040426-752	4.40254	0.942304	2.01086e-09	2.1105e-08	2.00746	0.751635	129	25	1.01986	0.19905	1.7281	0.317145
394045	NM_201070,XM_009296529	lmcd1	LIM and cysteine-rich domains 1	protein_coding	NP_957364.2;XP_009294804.1	ZDB-GENE-040426-1067	2.29911	2.18025	6.43339e-06	3.61318e-05	2.85376	1.89043	266	99	3.0111	1.10005	5.10215	1.7527
394052	NM_201077	ftcd	formimidoyltransferase cyclodeaminase	protein_coding	NP_957371.2	ZDB-GENE-030131-9643	3.48824	-0.695325	0.000878105	0.0029929	0.900271	0.317457	37	9	0.333931	0.077498	0.565828	0.123477
394056	NM_001328190,XM_017352208	wasf2	WAS protein family, member 2	protein_coding	NP_001315119.1;XP_017207697.1	ZDB-GENE-040426-865	-2.23668	5.28381	5.45425e-08	4.53794e-07	4.64668	5.77593	1027	1967	4.76069	9.36863	8.06673	14.927
394070	NM_201095,NM_201095_dup1	trim63b	tripartite motif containing 63b	protein_coding	NP_957389.1	ZDB-GENE-040426-1003	2.19522	-0.0306346	0.00834948	0.0217157	1.17919	0.654718	54	21	0.552098	0.211926	0.935501	0.337661
394072	NM_201097,XM_021474973	foxm1	forkhead box M1	protein_coding	NP_957391.1;XP_021330648.1	ZDB-GENE-040426-1275	-2.02311	0.828897	0.00255697	0.00771493	1.1026	1.73317	49	85	0.218854	0.394414	0.370837	0.628418
394077	NM_201102,XM_017358723,XM_017358724,XM_017358725	pde10a	phosphodiesterase 10A	protein_coding	NP_957396.2;XP_017214212.1;XP_017214213.1;XP_017214214.1	ZDB-GENE-040426-1115	2.73333	0.676273	4.50872e-05	0.000210223	1.69955	0.864287	96	30	0.368181	0.117548	0.623864	0.187288
394120	NM_201145	nudt3a	nudix (nucleoside diphosphate linked moiety X)-type motif 3a	protein_coding	NP_957439.1	ZDB-GENE-040426-792	-2.51732	2.8892	5.20491e-08	4.35808e-07	2.37617	3.53061	179	386	0.817226	1.80606	1.38475	2.87759
394132	NM_201157	arhgdig	Rho GDP dissociation inhibitor (GDI) gamma	protein_coding	NP_957451.1	ZDB-GENE-040426-1493	-2.37237	6.61643	2.96029e-09	3.03578e-08	5.88672	7.11892	2484	5046	16.3255	34.0671	27.6626	54.279
394142	NM_201167,XM_005171729	hpda	4-hydroxyphenylpyruvate dioxygenase a	protein_coding	NP_957461.1;XP_005171786.1	ZDB-GENE-040426-986	5.24862	0.0196691	3.29969e-07	2.4048e-06	1.37425	0.37943	68	11	0.574048	0.091168	0.972694	0.145257
394148	NM_201173	cyp7a1	cytochrome P450, family 7, subfamily A, polypeptide 1	protein_coding	NP_957467.2	ZDB-GENE-040426-1296	5.24146	0.835178	2.05006e-10	2.49098e-09	1.95615	0.629436	123	20	0.954036	0.156374	1.61656	0.24915
394149	NM_201174,XM_009306022,XM_021479571	rem1	RAS (RAD and GEM)-like GTP-binding 1	protein_coding	NP_957468.1;XP_009304297.1;XP_021335246.1	ZDB-GENE-040317-1	3.20307	4.57699	5.16657e-14	9.82536e-13	5.22004	3.62317	1549	414	12.5446	3.59446	21.2562	5.72704
394150	NM_201175,XM_021470117,XR_001797458	oxsr1b	oxidative stress responsive 1b	protein_coding	NP_957469.2;XP_021325792.1	ZDB-GENE-040426-723	-2.59409	4.67213	3.39367e-10	3.97433e-09	3.92287	5.23862	605	1344	2.10324	4.92006	3.56382	7.83911
394164	NM_201189	edem1	ER degradation enhancer, mannosidase alpha-like 1	protein_coding	NP_957483.2	ZDB-GENE-040426-808	-2.29916	5.1179	2.43969e-08	2.15062e-07	4.46128	5.62502	898	1768	4.13246	8.36125	7.00225	13.3219
394171	NM_201196,XM_021481365,XM_021481366,XM_021481367	shox2	short stature homeobox 2	protein_coding	NP_957490.1;XP_021337040.1;XP_021337041.1;XP_021337042.1	ZDB-GENE-040426-1457	5.76006	1.41622	2.40572e-14	4.76008e-13	2.43982	0.820276	189	28	1.56013	0.202005	2.64355	0.321853
394174	NM_201199	pik3cd	phosphatidylinositol-4,5-bisphosphate 3-kinase, catalytic subunit delta	protein_coding	NP_957493.1	ZDB-GENE-040426-1128	2.40882	2.97307	1.96882e-07	1.50309e-06	3.58566	2.47693	470	167	1.45652	0.531082	2.46799	0.84617
394198	NM_205569	fosab	v-fos FBJ murine osteosarcoma viral oncogene homolog Ab	protein_coding	NP_991132.1	ZDB-GENE-031222-4	-7.21476	6.93741	4.97403e-38	5.94425e-36	4.94639	7.7566	1274	7871	11.7187	74.3816	19.8567	118.512
394210	XM_002661156,XM_009299389,XM_017354756,XM_021473969,XM_021473970,XM_021473971	baiap2l2a	BAI1-associated protein 2-like 2a, transcript variant X1	protein_coding	XP_002661202.2;XP_009297664.1;XP_017210245.1	ZDB-GENE-040108-10	2.13336	-0.265852	0.0185387	0.0429594	1.03826	0.577503	45	18	0.201162	0.080997	0.34086	0.129052
399645	NM_212804	insig2	insulin induced gene 2	protein_coding	NP_997969.1	ZDB-GENE-040202-1	-2.44986	0.278359	0.000756638	0.00262576	0.747673	1.41588	29	61	0.434631	0.946469	0.736459	1.50801
399646	NM_001007287,NM_001007287_dup1,XM_009291101	fhl1a	four and a half LIM domains 1a	protein_coding	NP_001007288.1;XP_009289376.1	ZDB-GENE-040206-1	2.79612	2.35193	1.70862e-08	1.54569e-07	3.07435	1.86899	317	97	3.51052	1.0836	2.02499	0.590931
402785	NM_203420	bicc2	bicaudal C homolog 2	protein_coding	NP_981965.1	ZDB-GENE-110110-3	3.0917	-0.556959	0.00164801	0.00524871	0.953575	0.37943	40	11	0.207598	0.057557	0.351765	0.091705
402795	XM_005168397,XM_021471215,XR_002458985	sts	steroid sulfatase (microsomal), isozyme S, transcript variant X1	protein_coding	XP_005168454.1	ZDB-GENE-030717-5	-2.66199	2.82133	1.06699e-08	9.98753e-08	2.27511	3.48905	164	374	1.16719	2.63234	1.97774	4.1941
402798	NM_001118896,NM_001118896_dup1,XM_005162680	qtrtd1	queuine tRNA-ribosyltransferase domain containing 1	protein_coding	NP_001112368.2;XP_005162737.1	ZDB-GENE-060427-4	-2.05265	0.870891	0.00201	0.00623267	1.11825	1.76834	50	88	0.395572	0.703214	0.46041	0.820854
402799	NM_001163366	degs2	delta(4)-desaturase, sphingolipid 2	protein_coding	NP_001156838.1	ZDB-GENE-080228-1	-2.79482	4.68211	1.48184e-11	2.08478e-10	3.85912	5.27678	577	1381	3.87393	9.52497	6.56417	15.1761
402805	NM_205572,XM_005164288	pvalb1	parvalbumin 1	protein_coding	NP_991135.1;XP_005164345.1	ZDB-GENE-040625-57	2.10574	8.13525	2.27228e-07	1.71485e-06	8.57809	7.50792	16278	6619	371.068	155.375	628.754	247.558
402815	NM_001130592	nr1d2a	nuclear receptor subfamily 1, group D, member 2a	protein_coding	NP_001124064.2	ZDB-GENE-040504-1	-2.36154	6.18762	4.16253e-09	4.17903e-08	5.47067	6.69158	1851	3743	7.17382	14.901	12.1557	23.7417
402816	NM_212807	pou4f2	POU class 4 homeobox 2	protein_coding	NP_997972.1	ZDB-GENE-040401-1	4.51409	0.914286	1.31974e-09	1.42936e-08	1.99056	0.728009	127	24	1.3085	0.254321	2.21718	0.405209
402820	NM_205581	tmsb	thymosin, beta	protein_coding	NP_991144.1	ZDB-GENE-050307-5	2.34732	3.97047	4.94521e-08	4.15054e-07	4.51693	3.36816	935	341	37.9869	14.2082	64.3669	22.6378
402837	NM_001289794,NM_205583,XM_005170767	hamp	hepcidin antimicrobial peptide	protein_coding	NP_001276723.1;NP_991146.1;XP_005170824.1	ZDB-GENE-050726-1	3.03574	0.639716	1.11691e-05	5.92335e-05	1.69955	0.797757	96	27	2.13305	0.576054	3.61434	0.917824
402848	NM_214725,XM_021467128	asb2b	ankyrin repeat and SOCS box containing 2b	protein_coding	NP_999890.1;XP_021322803.1	ZDB-GENE-040426-20	2.86045	2.44755	5.26818e-09	5.1924e-08	3.16753	1.92201	341	102	2.30631	0.734485	3.90792	1.17025
402858	NM_212808,XM_021477448,XM_021477449,XM_021477450	rbm14b	RNA binding motif protein 14b	protein_coding	NP_997973.1;XP_021333123.1;XP_021333124.1;XP_021333125.1	ZDB-GENE-040426-2455	-2.59422	3.06504	1.08363e-08	1.01298e-07	2.4948	3.70411	198	440	0.963816	2.25382	1.63314	3.591
402875	NM_001001501,NM_001001501_dup1,NM_001312898,NM_001312898_dup1,XM_005165704,XM_005165706,XM_009302124	dzip1	DAZ interacting zinc finger protein 1	protein_coding	NP_001001501.2;NP_001299827.1;XP_005165761.1;XP_005165763.1;XP_009300399.1	ZDB-GENE-040526-1	2.37562	2.86159	3.88801e-07	2.791e-06	3.4776	2.39679	433	156	2.03181	0.745869	2.15341	0.895486
402884	NM_001199335,NM_001199335_dup1	tlr21	toll-like receptor 21	protein_coding	NP_001186264.1	ZDB-GENE-040220-4	8.00768	-1.17344	0.000103608	0.000445186	0.747673	0.113759	29	3	0.135599	0.013856	0.027191	0.022076
402894	NM_205602,NM_205602_dup1	smim14	small integral membrane protein 14	protein_coding	NP_991165.1	ZDB-GENE-040426-22	-2.1139	4.46809	8.4061e-07	5.62716e-06	3.9251	4.95423	606	1097	4.99166	9.2805	8.45811	14.7866
402903	NM_205610,XM_005172103,XM_005172104	raly	RALY heterogeneous nuclear ribonucleoprotein	protein_coding	NP_991173.1;XP_005172160.1;XP_005172161.1	ZDB-GENE-041010-127	2.15645	3.5077	1.60386e-06	1.01061e-05	4.04045	3.02948	660	262	6.43522	2.61749	10.9041	4.17044
402908	NM_001197300,NM_205615	e2f5	E2F transcription factor 5	protein_coding	NP_001184229.1;NP_991178.1	ZDB-GENE-030828-3	2.79132	0.500064	9.76363e-05	0.000422114	1.58035	0.77488	85	26	0.556075	0.172159	0.94224	0.2743
402914	NM_205619	her12	hairy-related 12	protein_coding	NP_991182.1	ZDB-GENE-040824-5	2.26329	2.2752	7.48124e-06	4.13496e-05	2.9311	1.97315	283	107	4.17266	1.61248	7.07035	2.56915
402937	NM_205640	mgp	matrix Gla protein	protein_coding	NP_991203.1	ZDB-GENE-060928-1	3.09413	3.49435	5.82776e-12	8.62598e-11	4.16432	2.69368	723	200	18.8818	5.36386	31.9943	8.54622
402939	NM_205642,XM_005157313	zgc:77938	zgc:77938	protein_coding	NP_991205.1;XP_005157370.1	ZDB-GENE-040426-1910	2.51579	5.47699	4.95375e-10	5.66569e-09	6.0145	4.71682	2718	925	23.4257	8.3012	39.6937	13.2263
402940	NM_205643	pnp4b	purine nucleoside phosphorylase 4b	protein_coding	NP_991206.1	ZDB-GENE-040426-1887	3.14252	-0.318761	0.000418716	0.00155516	1.08678	0.438851	48	13	0.606272	0.156715	1.0273	0.249693
402941	NM_205644	insm1a	insulinoma-associated 1a	protein_coding	NP_991207.1	ZDB-GENE-040426-1810	2.22695	3.66522	4.52713e-07	3.20711e-06	4.20336	3.14103	744	286	4.73956	1.86853	8.03093	2.97713
402948	NM_205650,XM_009293634	cd151l	CD151 antigen, like	protein_coding	NP_991213.1;XP_009291909.1	ZDB-GENE-040426-1868	-2.87345	3.8672	2.76894e-11	3.76465e-10	3.0903	4.49856	321	790	4.03867	10.089	6.84331	16.0748
402962	NM_205663,XM_021468792	lhfpl2a	lipoma HMGIC fusion partner-like 2a	protein_coding	NP_991226.1;XP_021324467.1	ZDB-GENE-040426-1839	2.12236	1.24435	0.000435749	0.00160932	2.04887	1.30847	134	54	1.6746	0.69222	2.83752	1.10291
402973	NM_205674	nrp1b	neuropilin 1b	protein_coding	NP_991237.1	ZDB-GENE-040611-1	2.258	-0.288909	0.0125613	0.0308612	1.03826	0.550818	45	17	0.339485	0.130592	0.57524	0.208071
402979	NM_205679	cda	cytidine deaminase	protein_coding	NP_991242.1	ZDB-GENE-040426-1911	-2.93871	-0.275754	0.000560744	0.0020154	0.48345	1.12165	17	43	0.193564	0.513154	0.327984	0.817606
402985	NM_205685,NM_205685_dup1,XM_005168340	grhprb	glyoxylate reductase/hydroxypyruvate reductase b	protein_coding	NP_991248.2;XP_005168397.1	ZDB-GENE-040426-1847	2.77005	-0.169654	0.00119594	0.00395319	1.14904	0.52363	52	16	0.442182	0.100416	0.641002	0.145613
402990	NM_205690,NM_205690_dup1,XM_005163003	rlbp1b	retinaldehyde binding protein 1b	protein_coding	NP_991253.1	ZDB-GENE-040426-1870	2.15477	6.13182	1.45897e-07	1.1399e-06	6.5955	5.50504	4087	1624	44.411	18.5807	75.2521	29.6045
402998	NM_205697	plxnd1	plexin D1	protein_coding	NP_991260.2	ZDB-GENE-040426-1828	2.50323	1.73319	3.43829e-06	2.03654e-05	2.50078	1.51585	199	68	1.25782	0.442057	2.13131	0.704328
402999	NM_205698,XM_021466666	irx4a	iroquois homeobox 4a	protein_coding	NP_991261.1;XP_021322341.1	ZDB-GENE-040426-1825	4.19062	2.95297	4.07734e-16	9.84601e-15	3.7428	1.98316	529	108	3.95447	0.829418	6.70064	1.32151
403003	NM_001328492,NM_001328493,NM_205702	fgf13b	fibroblast growth factor 13b	protein_coding	NP_001315421.1;NP_001315422.1;NP_991265.1	ZDB-GENE-040426-1793	2.31917	2.8282	8.61595e-07	5.76214e-06	3.43763	2.38927	420	155	2.79747	1.25699	4.74017	2.00275
403021	NM_205714,XM_009302064	ap1m2	adaptor-related protein complex 1, mu 2 subunit	protein_coding	NP_991277.1;XP_009300339.1	ZDB-GENE-041114-20	-2.21864	4.18004	2.27078e-07	1.71433e-06	3.61353	4.69718	480	912	4.52268	8.7751	7.66345	13.9813
403024	NM_205715,XM_021469945	slc25a19	solute carrier family 25 (mitochondrial thiamine pyrophosphate carrier), member 19	protein_coding	NP_991278.1;XP_021325620.1	ZDB-GENE-050417-292	2.466	3.63124	1.71358e-08	1.54952e-07	4.2125	3.01979	749	260	6.71059	2.29621	11.3707	3.65854
403026	NM_001139461	vtnb	vitronectin b	protein_coding	NP_001132933.1	ZDB-GENE-041116-1	2.01554	4.72772	3.17916e-06	1.89587e-05	5.18332	4.2118	1509	641	13.7851	6.00663	23.3581	9.57033
403027	NM_001139462,XM_021468032	snx10a	sorting nexin 10a	protein_coding	NP_001132934.1;XP_021323707.1	ZDB-GENE-050809-44	-2.47196	1.05113	5.27553e-05	0.000242271	1.11825	1.96306	50	106	0.50956	1.2451	0.863423	1.98382
403042	NM_205728,XM_021470118,XM_021470119	gli3	GLI family zinc finger 3	protein_coding	NP_991291.1;XP_021325793.1;XP_021325794.1	ZDB-GENE-041111-162	-2.57774	1.86408	9.83394e-07	6.4677e-06	1.5916	2.63137	86	190	0.290014	0.64999	0.491415	1.03563
403052	NM_205736,XM_005164355,XM_009299178	map2k4a	mitogen-activated protein kinase kinase 4a	protein_coding	NP_991299.2;XP_005164412.1;XP_009297453.1	ZDB-GENE-060512-98	-2.02303	1.90954	0.000169376	0.000692282	1.79025	2.5795	105	182	1.21651	2.3047	2.06131	3.67207
403131	NM_001131051,NM_001131051_dup1,XM_009307228	tlr4ba	toll-like receptor 4b, duplicate a	protein_coding	NP_001124523.1	ZDB-GENE-040219-8	2.19049	0.0910687	0.00547566	0.0150941	1.25192	0.70399	59	23	0.352489	0.150959	0.597274	0.240522
403133	NM_001089350,XM_005158050,XM_021466668	tlr18	toll-like receptor 18	protein_coding	NP_001082819.1;XP_005158107.1;XP_021322343.1	ZDB-GENE-040220-2	-3.03099	2.1303	3.08073e-09	3.1516e-08	1.65733	2.91383	92	239	0.360936	0.968422	0.611588	1.54298
403136	XM_017358120	tlr8b	toll-like receptor 8b	protein_coding	XP_017213609.1	ZDB-GENE-040219-12	-2.96532	-1.42971	0.0211438	0.048088	0.218988	0.577503	7	18	0.028885	0.082159	0.048944	0.130904
403137	XM_001920559	tlr8a	toll-like receptor 8a	protein_coding	XP_001920594.5	ZDB-GENE-040219-13	5.21414	0.521501	2.75038e-09	2.83294e-08	1.7202	0.52363	98	16	0.403597	0.064084	0.683873	0.102105
403145	NM_212814	myd88	myeloid differentiation primary response 88	protein_coding	NP_997979.2	ZDB-GENE-040219-3	-2.12688	2.89421	6.6164e-06	3.69328e-05	2.51858	3.46781	202	368	2.31996	4.34702	3.93106	6.92609
403148	XM_002667112,XM_017352088	tirap	toll-interleukin 1 receptor (TIR) domain containing adaptor protein, transcript variant X1	protein_coding	XP_002667158.2;XP_017207577.1	ZDB-GENE-040219-4	3.1434	-0.665095	0.00172226	0.00544562	0.900271	0.348776	37	10	0.389702	0.102775	0.660329	0.163752
403308	NM_203480	rtn4rl1b	reticulon 4 receptor-like 1b	protein_coding	NP_982347.1	ZDB-GENE-040310-3	2.24693	1.2196	0.00018864	0.000762093	2.04887	1.25987	134	51	0.590519	0.228668	1.0006	0.364336
403311	XM_021478510	cacna1db	calcium channel, voltage-dependent, L type, alpha 1D subunit, b	protein_coding	XP_021334185.1	ZDB-GENE-040525-3	2.37557	5.71941	4.31861e-09	4.32746e-08	6.2301	5.00795	3163	1140	6.35714	2.35302	10.7718	3.74906
403338	NM_212816	gnmt	glycine N-methyltransferase	protein_coding	NP_997981.1	ZDB-GENE-040227-1	-2.68982	4.85486	6.23379e-11	8.04388e-10	4.05881	5.43106	669	1541	8.06577	19.097	13.667	30.4271
404039	NM_001077779,NM_205756	npsn	nephrosin	protein_coding	NP_001071247.1;NP_991319.2	ZDB-GENE-040420-2	2.68016	0.609186	9.08665e-05	0.000395529	1.64658	0.84245	91	29	1.02166	0.336633	1.73114	0.536356
404206	NM_212818	ccna1	cyclin A1	protein_coding	NP_997983.2	ZDB-GENE-040311-2	8.08513	2.1085	9.0282e-23	4.16426e-21	3.09426	0.948475	322	34	3.05169	0.33109	5.17092	0.527524
404210	NM_212821	crim1	cysteine rich transmembrane BMP regulator 1 (chordin-like)	protein_coding	NP_997986.1	ZDB-GENE-040312-2	-6.83574	1.21999	1.14535e-15	2.6531e-14	0.664862	2.32773	25	147	0.121016	0.741828	0.205055	1.18195
404211	NM_212822,NM_212822_dup1,XM_005163369,XM_005163370	pik3r2	phosphoinositide-3-kinase, regulatory subunit 2 (beta)	protein_coding	NP_997987.2;XP_005163426.1;XP_005163427.1	ZDB-GENE-040309-1	-2.51388	2.42918	2.11152e-07	1.60563e-06	2.01584	3.11394	130	280	0.588856	1.25905	0.380207	0.956424
404232	NM_212824,XM_005168522	chst11	carbohydrate (chondroitin 4) sulfotransferase 11	protein_coding	NP_997989.2;XP_005168579.1	ZDB-GENE-040315-1	-2.49959	2.86584	7.01799e-08	5.75475e-07	2.3631	3.50651	177	379	1.05967	2.25192	1.79555	3.58797
404273	NM_207064	chrnd	cholinergic receptor, nicotinic, delta (muscle)	protein_coding	NP_996947.1	ZDB-GENE-030131-6665	-2.40567	-0.730522	0.0187538	0.0433794	0.409074	0.84245	14	29	0.103845	0.2219	0.17596	0.353552
404608	NM_207076,XM_021476052,XR_661750	rad51d	RAD51 paralog D	protein_coding	NP_996959.2;XP_021331727.1	ZDB-GENE-040426-2490	-3.49123	0.544339	8.80473e-07	5.87531e-06	0.706862	1.6849	27	81	0.281433	1.10505	0.476873	1.76067
404609	NM_207077	slc22a6l	solute carrier family 22 (organic anion transporter), member 6, like	protein_coding	NP_996960.2	ZDB-GENE-040426-2249	2.22852	-0.657689	0.0222191	0.0501862	0.844921	0.438851	34	13	0.200072	0.077363	0.339012	0.123263
404612	NM_207080,XM_021479526	ralbp1	ralA binding protein 1	protein_coding	NP_996963.1;XP_021335201.1	ZDB-GENE-040426-2098	-4.04557	2.66776	7.36233e-15	1.56101e-13	1.80965	3.47847	107	371	0.739982	2.27898	1.25386	3.63109
404617	NM_207085	zgc:77287	zgc:77287	protein_coding	NP_996968.1	ZDB-GENE-040426-2337	-2.31483	2.2314	3.6693e-06	2.16666e-05	1.92979	2.90859	120	238	1.47485	3.01656	2.49905	4.80627
404626	NM_207094,XM_005167389	map3k12	mitogen-activated protein kinase kinase kinase 12	protein_coding	NP_996977.1;XP_005167446.1	ZDB-GENE-040426-2436	2.37958	0.441228	0.000899355	0.0030569	1.49902	0.820276	78	28	0.289987	0.106727	0.491368	0.170047
404630	NM_207098	zc3h10	zinc finger CCCH-type containing 10	protein_coding	NP_996981.1	ZDB-GENE-040426-2359	2.18853	4.2504	3.49307e-07	2.52854e-06	4.75699	3.68889	1112	435	7.90915	3.17398	13.4016	5.05709
404725	NM_212825,NM_212825_dup1	cx30.3	connexin 30.3	protein_coding	NP_997990.2	ZDB-GENE-040406-1	-4.75167	1.82208	3.11381e-14	6.08668e-13	1.14904	2.76506	52	212	0.354085	1.49992	0.599979	2.38982
404727	NM_001130636,XM_005158501	cx34.4	connexin 34.4	protein_coding	NP_001124108.1;XP_005158558.1	ZDB-GENE-040406-3	-5.73353	4.95119	2.19083e-28	1.48166e-26	3.34757	5.74537	392	1925	1.665	8.36278	2.82126	13.3244
404729	NM_001007213,XM_005167687,XM_021478635	gja5a	gap junction protein, alpha 5a	protein_coding	NP_001007214.1;XP_005167744.1;XP_021334310.1	ZDB-GENE-040407-3	22.2908	0.467657	1.52823e-17	4.26869e-16	1.80965	0.149769	107	4	0.918876	0.050532	1.55699	0.080512
405757	NM_212832	oclna	occludin a	protein_coding	NP_997997.2	ZDB-GENE-040426-2685	-2.24696	6.27782	2.82717e-08	2.46943e-07	5.60792	6.75943	2040	3925	14.3255	28.3106	24.2738	45.1072
405766	NM_212840,XM_005160144,XM_005160145,XM_005160146	b3gnt2a	UDP-GlcNAc:betaGal beta-1,3-N-acetylglucosaminyltransferase 2a	protein_coding	NP_998005.1;XP_005160201.1;XP_005160202.1;XP_005160203.1	ZDB-GENE-090312-192	-7.52012	2.96598	7.87447e-28	5.11184e-26	1.49902	3.88323	78	503	0.46097	3.15332	0.78109	5.02417
405767	NM_212841,XM_009306356	bsk146	brain specific kinase 146	protein_coding	NP_998006.1;XP_009304631.1	ZDB-GENE-060313-3	2.30684	0.505921	0.001226	0.00404138	1.53443	0.864287	81	30	0.500359	0.186617	0.847832	0.297336
405770	NM_212844	il1b	interleukin 1, beta	protein_coding	NP_998009.2	ZDB-GENE-040702-2	4.75434	2.19034	2.16382e-15	4.86754e-14	3.07435	1.35549	317	57	2.86155	0.529095	4.84875	0.843004
405771	NM_212845,XM_009294595	rhag	Rh-associated glycoprotein	protein_coding	NP_998010.1;XP_009292870.1	ZDB-GENE-030131-8229	8.00316	1.87105	7.57107e-21	2.94893e-19	2.88153	0.84245	272	29	2.45015	0.272358	4.15164	0.433947
405776	NM_212850,XM_017354068	glcea	glucuronic acid epimerase a	protein_coding	NP_998015.2;XP_017209557.1	ZDB-GENE-040630-9	2.07994	3.39943	5.57122e-06	3.16958e-05	3.92287	2.96526	605	249	3.8639	1.58541	6.54717	2.52603
405778	NM_212852	grem1a	gremlin 1a, DAN family BMP antagonist	protein_coding	NP_998017.1	ZDB-GENE-040625-1	2.41696	-0.146411	0.00405285	0.0115789	1.13373	0.577503	51	18	0.607626	0.215164	1.02959	0.34282
405781	NM_212855,NM_212855_dup1,XM_021469979,XM_021469986	nfe2l1a	nuclear factor, erythroid 2-like 1a	protein_coding	NP_998020.2;XP_021325654.1;XP_021325661.1	ZDB-GENE-040630-5	-3.41637	2.13047	1.00154e-10	1.26065e-09	1.569	2.95002	84	246	0.292023	0.87717	0.494817	1.17151
405783	NM_212857,NM_212857_dup1	ostf1	osteoclast stimulating factor 1	protein_coding	NP_998022.1	ZDB-GENE-040625-157	-4.07124	3.32306	7.72055e-17	1.99737e-15	2.30276	4.08966	168	586	2.09393	7.51719	3.54806	11.9771
405788	NM_212862,XM_021468385	runx2b	runt-related transcription factor 2b	protein_coding	NP_998027.2;XP_021324060.1	ZDB-GENE-040629-4	-2.82545	3.41892	1.81078e-10	2.20789e-09	2.71659	4.0663	238	576	0.552303	1.4521	0.935849	2.31363
405791	NM_214726	cacna1sb	calcium channel, voltage-dependent, L type, alpha 1S subunit, b	protein_coding	NP_999891.1	ZDB-GENE-051227-1	2.51336	3.68349	8.18081e-09	7.80704e-08	4.26966	3.04868	781	266	2.05842	0.718656	3.48789	1.14503
405793	NM_212434,XM_005158769	disp2	dispatched homolog 2 (Drosophila)	protein_coding	NP_997599.1;XP_005158826.1	ZDB-GENE-030915-1	2.17045	4.35042	4.06313e-07	2.911e-06	4.85012	3.78933	1189	469	3.19046	1.28569	5.40607	2.04848
405794	NM_001017996	gfra2a	GDNF family receptor alpha 2a	protein_coding	NP_001017996.1	ZDB-GENE-040630-1	2.55086	-0.871838	0.0174197	0.0406918	0.767654	0.348776	30	10	0.309183	0.104886	0.523895	0.167114
405796	NM_214728	dlg4b	discs, large homolog 4b (Drosophila)	protein_coding	NP_999893.1	ZDB-GENE-040628-3	2.07422	3.30769	7.08227e-06	3.93869e-05	3.83565	2.88741	567	234	3.35989	1.42052	5.69316	2.26331
405798	NM_214730,XM_005172174,XM_005172175	asb7	ankyrin repeat and SOCS box containing 7	protein_coding	NP_999895.1;XP_005172231.1;XP_005172232.1	ZDB-GENE-040426-2429	-3.3829	0.2249	1.54697e-05	7.99052e-05	0.599476	1.45957	22	64	0.218698	0.650582	0.370573	1.03657
405801	NM_212865,XR_002456099,XR_222595	rbm24a	RNA binding motif protein 24a	protein_coding	NP_998030.1	ZDB-GENE-040628-1	-56.434	1.79377	6.41203e-41	8.87264e-39	0.159737	2.9602	5	248	0.10113	5.37999	0.17136	8.57191
405810	NM_212874,XM_009291251	ehd1a	EH-domain containing 1a	protein_coding	NP_998039.1;XP_009289526.1	ZDB-GENE-040426-2518	-2.05395	5.45184	1.01503e-06	6.64253e-06	4.8894	5.90269	1223	2151	5.4434	9.74293	9.22355	15.5234
405812	NM_212876	cyb5b	cytochrome b5 type B	protein_coding	NP_998041.1	ZDB-GENE-040426-2614	-2.40145	4.30381	1.17541e-08	1.09295e-07	3.65435	4.85001	495	1018	4.31725	9.12929	7.31535	14.5457
405815	NM_212879,XM_005161894	irf10	interferon regulatory factor 10	protein_coding	NP_998044.1;XP_005161951.1	ZDB-GENE-040426-2084	-2.3165	2.89814	6.45725e-07	4.42828e-06	2.45222	3.50651	191	379	1.70007	3.45562	2.88069	5.50583
405825	NM_001328345,NM_212889	mfap4	microfibrillar-associated protein 4	protein_coding	NP_001315274.1;NP_998054.2	ZDB-GENE-040426-2246	3.02073	1.7988	2.82215e-08	2.46607e-07	2.61547	1.43059	219	62	3.47224	0.926558	5.88352	1.47628
405829	NM_212893	dpydb	dihydropyrimidine dehydrogenase b	protein_coding	NP_998058.1	ZDB-GENE-040426-2459	2.47907	0.0874825	0.00149259	0.00480613	1.28002	0.654718	61	21	0.263531	0.093754	0.44654	0.149378
405830	NM_212894	lgals2a	lectin, galactoside-binding, soluble, 2a	protein_coding	NP_998059.2	ZDB-GENE-050318-2	2.54702	4.1437	1.96279e-09	2.06351e-08	4.71644	3.44987	1080	363	19.2407	6.63957	32.6024	10.5788
405833	NM_001098198,NM_212897	clic5b	chloride intracellular channel 5b	protein_coding	NP_001091668.1;NP_998062.1	ZDB-GENE-040426-2542	-72.4056	6.10605	1.67344e-109	2.19984e-106	1.52272	7.09661	80	4968	0.930407	59.4708	1.57653	94.7546
405843	NM_212907	foxq1b	forkhead box Q1b	protein_coding	NP_998072.1	ZDB-GENE-040426-2090	-4.77608	5.56386	2.03799e-24	1.07701e-22	4.11838	6.30721	699	2859	7.43413	31.2328	12.5967	49.763
405846	NM_212910	stx11a	syntaxin 11a	protein_coding	NP_998075.1	ZDB-GENE-040426-2564	-2.01761	2.94608	2.56751e-05	0.000126737	2.60441	3.49256	217	375	2.47474	4.4008	4.19332	7.01178
405847	NM_212911,NM_212911_dup1	sapcd2	suppressor APC domain containing 2	protein_coding	NP_998076.1	ZDB-GENE-050128-1	-7.92152	5.44936	1.64019e-38	2.0057e-36	3.43138	6.2957	418	2836	7.3759	51.4252	1.40269	1.91775
405875	NM_212939,XM_021481369,XM_021481370,XM_021481371,XR_002459979	zgc:85932	zgc:85932	protein_coding	NP_998104.1;XP_021337044.1;XP_021337045.1;XP_021337046.1	ZDB-GENE-040426-2460	4.30284	0.738943	1.72024e-08	1.5542e-07	1.8477	0.679564	111	22	0.693936	0.135139	1.17584	0.215316
405877	NM_212941,XM_005169422,XM_009306341	mafgb	v-maf avian musculoaponeurotic fibrosarcoma oncogene homolog Gb	protein_coding	NP_998106.1;XP_005169479.1;XP_009304616.1	ZDB-GENE-040426-2403	-3.31864	-1.15342	0.00418133	0.0119	0.247725	0.70399	8	23	0.037766	0.119122	0.063993	0.189796
405887	NM_212951	nf2b	neurofibromin 2b (merlin)	protein_coding	NP_998116.1	ZDB-GENE-040622-3	-2.4838	2.26607	4.84769e-07	3.41008e-06	1.90294	2.96526	117	249	0.839573	1.83466	1.42261	2.92316
405902	NM_212966,XM_017357663	nrp2b	neuropilin 2b	protein_coding	NP_998131.1;XP_017213152.1	ZDB-GENE-040611-3	2.43984	4.08761	9.92305e-09	9.32164e-08	4.64533	3.439	1026	360	3.18911	1.11666	5.40377	1.77917
406202	NM_212968	heg1	heart development protein with EGF-like domains 1	protein_coding	NP_998133.2	ZDB-GENE-040714-1	2.04566	2.37483	6.20346e-05	0.000281141	2.97902	2.12559	294	123	0.999941	0.428919	1.69435	0.683395
406248	NM_212976	itm2bb	integral membrane protein 2Bb	protein_coding	NP_998141.1	ZDB-GENE-040426-2139	-3.03138	7.08666	3.5919e-14	6.98876e-13	6.09627	7.68209	2879	7473	30.1705	80.4213	51.1223	128.135
406255	NM_212982,XM_021480553	fancl	Fanconi anemia, complementation group L	protein_coding	NP_998147.1;XP_021336228.1	ZDB-GENE-040426-1045	-2.0125	0.880293	0.00223723	0.00685844	1.13373	1.76834	51	88	0.407434	0.723847	0.690375	1.1533
406261	NM_212988,XM_005159885	pdcd4a	programmed cell death 4a	protein_coding	NP_998153.1;XP_005159942.1	ZDB-GENE-040426-1920	-3.02429	6.4817	5.30248e-14	1.00475e-12	5.50456	7.07979	1896	4910	10.3512	27.7752	17.5396	44.2541
406265	NM_212992,XR_002459805	agpat4	1-acylglycerol-3-phosphate O-acyltransferase 4 (lysophosphatidic acid acyltransferase, delta)	protein_coding	NP_998157.1	ZDB-GENE-040426-1924	-2.46391	3.51517	2.04595e-08	1.82341e-07	2.92221	4.10579	281	593	2.33406	5.163	3.95495	8.22618
406272	NM_212999	sema6d	sema domain, transmembrane domain (TM), and cytoplasmic domain, (semaphorin) 6D	protein_coding	NP_998164.3	ZDB-GENE-040426-1933	2.64966	7.17639	2.22036e-11	3.06435e-10	7.72062	6.32602	8965	2897	41.0915	13.6356	69.6274	21.7255
406276	NM_213003	s100a10b	S100 calcium binding protein A10b	protein_coding	NP_998168.1	ZDB-GENE-040426-1937	-2.30241	9.34405	6.78205e-09	6.56451e-08	8.62411	9.8252	16807	33134	392.623	794.911	665.279	1266.53
406278	NM_213005,XM_005173544,XM_021466669,XM_021466670	ggctb	gamma-glutamylcyclotransferase b	protein_coding	NP_998170.1;XP_005173601.1;XP_021322344.1;XP_021322345.1	ZDB-GENE-040426-1939	-40.8844	8.23213	9.07958e-102	1.00511e-98	3.94058	9.19967	613	21464	10.7371	352.741	18.1934	562.021
406280	NM_001327825	itih2	inter-alpha-trypsin inhibitor heavy chain 2	protein_coding	NP_001314754.1	ZDB-GENE-040426-1942	4.3896	1.09673	4.59352e-10	5.27665e-09	2.12829	0.820276	144	28	0.680762	0.135539	1.15352	0.215953
406311	NM_001291329,NM_213038	pik3r3a	phosphoinositide-3-kinase, regulatory subunit 3a (gamma)	protein_coding	NP_001278258.1;NP_998203.2	ZDB-GENE-040426-1978	-2.25483	6.66238	2.19246e-08	1.94328e-07	5.98226	7.14257	2657	5130	12.3004	24.3238	20.8423	38.755
406315	NM_213042	rab42a	RAB42, member RAS oncogene family a	protein_coding	NP_998207.1	ZDB-GENE-040426-1983	2.4938	1.23845	3.18217e-05	0.000154047	2.09705	1.20958	140	48	2.1508	0.750815	3.64441	1.19627
406322	NM_213049	poc1a	POC1 centriolar protein A	protein_coding	NP_998214.1	ZDB-GENE-040426-1993	-2.14327	-0.427673	0.020365	0.0465432	0.530986	0.968776	19	35	0.219526	0.412972	0.371976	0.657986
406323	NM_213050	chia.1	chitinase, acidic.1	protein_coding	NP_998215.1	ZDB-GENE-040426-1994	4.70937	1.56862	1.08833e-12	1.75141e-11	2.53032	1.00854	204	37	1.85777	0.340558	3.14789	0.54261
406336	NM_213063,XM_005162879	wdr24	WD repeat domain 24	protein_coding	NP_998228.1;XP_005162936.1	ZDB-GENE-040426-2012	2.12605	3.39171	3.11997e-06	1.8648e-05	3.9251	2.93977	606	244	3.17431	1.30948	5.37871	2.08639
406338	NM_213249	chia.2	chitinase, acidic.2	protein_coding	NP_998414.1	ZDB-GENE-040426-2014	5.1599	2.23674	8.87291e-17	2.27313e-15	3.13329	1.32432	332	55	2.93338	0.495243	4.97046	0.789068
406351	NM_213078	ripk4	receptor-interacting serine-threonine kinase 4	protein_coding	NP_998243.1	ZDB-GENE-040426-2042	-3.80687	4.21763	2.95378e-17	7.99573e-16	3.12557	4.92725	330	1076	1.41923	4.76323	2.40481	7.58924
406363	NM_213090	scinlb	scinderin like b	protein_coding	NP_998255.2	ZDB-GENE-040426-2068	-4.21069	9.24498	2.0172e-22	8.93218e-21	7.86962	9.93898	9945	35856	53.7241	198.926	91.0327	316.948
406374	NM_213101,NM_213101_dup1	hapln3	hyaluronan and proteoglycan link protein 3	protein_coding	NP_998266.1	ZDB-GENE-040426-2089	3.40764	0.0456148	4.77692e-05	0.000221501	1.32116	0.52363	64	16	0.49887	0.122548	0.845309	0.195255
406377	NM_214733	azi2	5-azacytidine induced 2	protein_coding	NP_999898.1	ZDB-GENE-040426-2097	-4.09721	3.05804	2.78202e-16	6.85179e-15	2.08913	3.84256	139	488	0.746927	2.69179	1.26563	4.28882
406380	NM_001328209,XM_017359226,XM_021481372	zgc:63694	zgc:63694	protein_coding	NP_001315138.1;XP_017214715.1;XP_021337047.1	ZDB-GENE-040426-2105	-8.608	2.68836	1.46116e-28	9.97809e-27	1.22327	3.64541	57	421	0.32698	2.74194	0.554052	4.36872
406399	NM_001270536,NM_213125,XM_005165975,XM_005165976	nipa2	non imprinted in Prader-Willi/Angelman syndrome 2 (human)	protein_coding	NP_001257465.1;NP_998290.1;XP_005166032.1;XP_005166033.1	ZDB-GENE-040426-2134	-2.11658	5.25438	4.02094e-07	2.88348e-06	4.67075	5.72239	1045	1894	9.06258	16.6119	15.3561	26.4677
406424	NM_213150	slc22a2	solute carrier family 22 (organic cation transporter), member 2	protein_coding	NP_998315.1	ZDB-GENE-040426-2167	6.91094	2.30856	1.0415e-21	4.35506e-20	3.25152	1.15747	364	45	1.99247	0.249625	3.37614	0.397726
406426	NM_213152,XM_021467136,XM_021467137	spint1a	serine peptidase inhibitor, Kunitz type 1 a	protein_coding	NP_998317.1;XP_021322811.1;XP_021322812.1	ZDB-GENE-040426-2169	-2.74998	6.38067	5.32278e-12	7.90078e-11	5.5053	6.94443	1897	4467	12.6316	30.5342	21.4035	48.65
406431	NM_214734	prrx1a	paired related homeobox 1a	protein_coding	NP_999899.1	ZDB-GENE-020905-5	-2.023	4.93472	2.32392e-06	1.41925e-05	4.40658	5.38837	863	1495	8.33426	14.8252	14.122	23.621
406448	NM_213169	mpzl3	myelin protein zero-like 3	protein_coding	NP_998334.1	ZDB-GENE-040426-2197	-2.10597	3.30125	4.33489e-06	2.52145e-05	2.87234	3.83981	270	487	3.4983	6.49216	5.92769	10.3439
406454	NM_001017593,NM_001017593_dup1	epcam	epithelial cell adhesion molecule	protein_coding	NP_001017593.1	ZDB-GENE-040426-2209	-2.18666	5.75857	9.66209e-08	7.74772e-07	5.12739	6.23362	1450	2715	17.5558	33.7559	29.7474	53.7832
406471	NM_213190	tnfrsf1a	tumor necrosis factor receptor superfamily, member 1a	protein_coding	NP_998355.1	ZDB-GENE-040426-2252	-2.70288	4.87708	4.81079e-11	6.32803e-10	4.07494	5.45465	677	1567	4.17444	9.92922	7.07338	15.8202
406473	NM_213192,NM_213192_dup1	pck2	phosphoenolpyruvate carboxykinase 2 (mitochondrial)	protein_coding	NP_998357.1	ZDB-GENE-040426-2266	-2.0455	1.68442	0.000266177	0.00103695	1.62484	2.39679	89	156	0.447742	0.809156	0.6257	0.583855
406482	NM_213201	gdpd3a	glycerophosphodiester phosphodiesterase domain containing 3a	protein_coding	NP_998366.1	ZDB-GENE-040426-2279	-2.80188	6.12582	2.57211e-12	3.94885e-11	5.23715	6.69882	1568	3762	18.9361	46.6661	32.0863	74.3528
406496	NM_213215	aldoab	aldolase a, fructose-bisphosphate, b	protein_coding	NP_998380.1	ZDB-GENE-040426-2299	2.28917	4.38484	6.59461e-08	5.42238e-07	4.9064	3.77211	1238	463	13.9758	5.37007	23.6813	8.55612
406504	NM_213223	marcksl1b	MARCKS-like 1b	protein_coding	NP_998388.1	ZDB-GENE-040426-2315	2.23943	8.46015	2.16618e-08	1.92229e-07	8.93024	7.77076	20790	7949	206.681	81.1462	350.21	129.29
406525	NM_213242	dnm2b	dynamin 2b	protein_coding	NP_998407.1	ZDB-GENE-040426-2371	-2.30474	3.8893	9.33891e-08	7.51149e-07	3.31399	4.43432	382	754	1.98588	4.02887	3.36497	6.41918
406531	NM_213248,NM_213248_dup1	arl4cb	ADP-ribosylation factor-like 4Cb	protein_coding	NP_998413.1	ZDB-GENE-040426-2382	-2.70332	3.60088	5.96023e-10	6.76533e-09	2.91327	4.2224	279	646	2.89598	6.89454	4.90708	10.985
406537	NM_213452	slc13a2	solute carrier family 13 (sodium-dependent dicarboxylate transporter), member 2	protein_coding	NP_998617.2	ZDB-GENE-040426-2389	3.34452	-0.1544	0.000216832	0.000863429	1.19403	0.467668	55	14	0.333173	0.084536	0.564545	0.134691
406539	NM_213011	amy2a	amylase, alpha 2A (pancreatic)	protein_coding	NP_998176.2	ZDB-GENE-040426-2393	6.86632	0.336529	4.86892e-10	5.57778e-09	1.62484	0.37943	89	11	0.85472	0.102671	1.44828	0.163585
406540	NM_213256,NM_213256_dup1,XM_009299771	ttyh2l	tweety homolog 2, like	protein_coding	NP_998421.1	ZDB-GENE-040426-2394	2.21999	4.6533	1.36616e-07	1.07298e-06	5.1542	4.0521	1478	570	8.32549	3.3151	14.1071	5.28193
406546	NM_213262	eif5a2	eukaryotic translation initiation factor 5A2	protein_coding	NP_998427.1	ZDB-GENE-040426-2405	-2.01228	7.74037	1.1711e-06	7.57897e-06	7.15938	8.16315	6062	10445	39.0539	69.1057	66.1748	110.106
406548	NM_213264,NM_213264_dup1	col9a1b	collagen, type IX, alpha 1b	protein_coding	NP_998429.2	ZDB-GENE-040426-2410	2.19521	2.90565	3.18866e-06	1.901e-05	3.48667	2.49804	436	170	2.4109	0.964201	3.04444	1.53626
406560	NM_213275	vgll4b	vestigial-like family member 4b	protein_coding	NP_998440.1	ZDB-GENE-040426-2445	-7.22671	3.15279	5.49039e-28	3.60873e-26	1.65733	4.0521	92	570	1.50476	9.60305	2.54975	15.3005
406584	NM_213295,XM_009293129,XM_009293130	abraxas2b	abraxas 2b, BRISC complex subunit	protein_coding	NP_998460.1;XP_009291404.1;XP_009291405.1	ZDB-GENE-040426-2491	-2.36806	2.46452	1.06256e-06	6.92556e-06	2.08913	3.12303	139	282	0.920326	1.92744	1.55944	3.07097
406601	NM_213309,XM_021478235	stap2b	signal transducing adaptor family member 2b	protein_coding	NP_998474.1;XP_021333910.1	ZDB-GENE-040426-2540	-4.06695	0.293259	5.00719e-07	3.51406e-06	0.554179	1.54318	20	70	0.073175	0.590788	0.123991	0.9413
406615	NM_214753	gpd1c	glycerol-3-phosphate dehydrogenase 1c	protein_coding	NP_999918.1	ZDB-GENE-040426-2576	-3.24177	6.22358	1.8354e-15	4.16778e-14	5.17866	6.84772	1504	4175	16.1954	46.174	27.4423	73.5688
406623	NM_213321,NM_213321_dup1,XM_005162880,XR_002456607	decr2	2,4-dienoyl CoA reductase 2, peroxisomal	protein_coding	NP_998486.1;XP_005162937.1	ZDB-GENE-040426-2612	-2.17307	2.20443	2.01236e-05	0.000101672	1.95615	2.8605	123	229	1.26909	2.27909	2.1101	3.06802
406633	NM_213328	tesca	tescalcin a	protein_coding	NP_998493.1	ZDB-GENE-040426-2632	-3.55641	3.66412	6.1868e-15	1.31975e-13	2.71144	4.37471	237	722	1.65199	5.18365	2.79921	8.25909
406650	NM_213296	timp2b	TIMP metallopeptidase inhibitor 2b	protein_coding	NP_998461.1	ZDB-GENE-040426-2655	-2.64912	4.62574	1.65846e-10	2.0304e-09	3.85912	5.20158	577	1309	3.03925	7.08256	5.14985	11.2846
406651	NM_213342	ddc	dopa decarboxylase	protein_coding	NP_998507.1	ZDB-GENE-040426-2656	6.07726	2.8763	1.8312e-22	8.14285e-21	3.75286	1.60933	533	75	2.00501	0.286667	3.39739	0.456746
406658	NM_213349,XM_021479618	cnn2	calponin 2	protein_coding	NP_998514.1;XP_021335293.1	ZDB-GENE-030131-542	-2.01167	6.20705	1.54979e-06	9.79174e-06	5.64485	6.63871	2094	3607	14.763	26.0167	25.0151	41.4523
406662	NM_213353,NM_213353_dup1,NM_213353_dup2	msmo1	methylsterol monooxygenase 1	protein_coding	NP_998518.1	ZDB-GENE-040426-2670	-2.20278	4.42542	2.11435e-07	1.6072e-06	3.84743	4.93114	572	1079	5.66606	10.9794	9.60084	17.4934
406666	NM_001326713,NM_001326713_dup1,NM_001326713_dup2,XM_009292494,XM_017353102,XM_017353106,XM_021469872,XM_021469911,XM_021469944,XM_021469965,XM_021469996,XM_021470020,XR_002456597,XR_002456601	gab1	GRB2-associated binding protein 1	protein_coding	NP_001313642.1;XP_009290769.1;XP_017208591.1;XP_017208595.1;XP_021325547.1;XP_021325586.1;XP_021325619.1;XP_021325640.1;XP_021325671.1;XP_021325695.1	ZDB-GENE-040426-2674	-2.00427	3.50216	1.28548e-05	6.75262e-05	3.0903	4.00619	321	551	1.83556	1.93622	2.63312	3.08497
406676	NM_213367	adgrl4	adhesion G protein-coupled receptor L4	protein_coding	NP_998532.2	ZDB-GENE-040426-2689	6.669	1.78237	5.73251e-18	1.66536e-16	2.77698	0.906995	250	32	1.5543	0.202565	2.63367	0.322746
406717	NM_213408,NM_213408_dup1,XM_005172105,XM_005172109,XM_009302668,XM_017356461	slc25a22	solute carrier family 25 (mitochondrial carrier: glutamate), member 22	protein_coding	NP_998573.1	ZDB-GENE-040426-2745	-2.2116	8.30331	3.54268e-08	3.04384e-07	7.62717	8.76827	8400	15907	49.4378	96.1226	65.3081	36.3137
406727	NM_213418	nudt1	nudix (nucleoside diphosphate linked moiety X)-type motif 1	protein_coding	NP_998583.1	ZDB-GENE-040426-2757	2.90496	0.953861	6.2129e-06	3.5015e-05	1.9209	0.968776	119	35	1.45529	0.430723	2.46592	0.686268
406738	NM_213639	cfl1l	cofilin 1 (non-muscle), like	protein_coding	NP_998804.1	ZDB-GENE-040426-2770	-2.29352	8.47651	8.36993e-09	7.96222e-08	7.76339	8.95721	9236	18138	125.258	252.627	212.244	402.51
406739	NM_213430,XM_005156519	pla2g12b	phospholipase A2, group XIIB	protein_coding	NP_998595.2;XP_005156576.1	ZDB-GENE-040426-2771	3.70706	-0.78464	0.000883481	0.00300976	0.863608	0.285442	35	8	0.293119	0.068147	0.496675	0.108578
406744	NM_213435,XM_005158875,XM_021467138	gskip	gsk3b interacting protein	protein_coding	NP_998600.1;XP_005158932.1;XP_021322813.1	ZDB-GENE-040426-2777	-2.10514	6.19279	3.22723e-07	2.35525e-06	5.58769	6.64582	2011	3625	16.2609	29.9815	27.5533	47.7693
406746	NM_213437,NM_213437_dup1	fpgs	folylpolyglutamate synthase	protein_coding	NP_998602.2	ZDB-GENE-040426-2781	-2.97298	3.76248	8.99219e-12	1.29366e-10	2.96611	4.4104	291	741	1.65962	4.35267	2.50555	5.43103
406765	NM_213456	stk38a	serine/threonine kinase 38a	protein_coding	NP_998621.1	ZDB-GENE-040426-2811	-3.09982	3.11689	1.48888e-11	2.09188e-10	2.38267	3.81479	180	478	1.21037	3.30196	2.05091	5.261
406766	NM_213457	chmp4bb	charged multivesicular body protein 4Bb	protein_coding	NP_998622.1	ZDB-GENE-040426-2812	-2.134	5.97571	2.13871e-07	1.62512e-06	5.36233	6.43719	1714	3132	15.2229	28.579	25.7944	45.5347
406769	NM_213460	syt11a	synaptotagmin XIa	protein_coding	NP_998625.2	ZDB-GENE-040426-2815	2.51063	3.43588	1.42834e-08	1.31018e-07	4.03428	2.83308	657	224	4.62863	1.61421	7.84296	2.57191
406777	NM_213468	aqp3a	aquaporin 3a	protein_coding	NP_998633.1	ZDB-GENE-040426-2826	-4.92055	8.90814	9.78018e-27	5.97984e-25	7.35118	9.64297	6930	29198	59.4264	257.152	100.695	409.719
406778	NM_213469,NM_213469_dup1	exo1	exonuclease 1	protein_coding	NP_998634.1	ZDB-GENE-040426-2828	-4.53455	-0.288498	8.34737e-06	4.56739e-05	0.35727	1.19242	12	47	0.069007	0.275145	0.079542	0.142337
406779	NM_213470	tax1bp3	Tax1 (human T-cell leukemia virus type I) binding protein 3	protein_coding	NP_998635.1	ZDB-GENE-040426-2830	-2.56764	5.66403	1.71642e-10	2.10015e-09	4.87796	6.20823	1213	2667	15.2275	34.3926	25.8021	54.7976
406782	NM_213473,NM_213473_dup1,XM_005167152	mapk4	mitogen-activated protein kinase 4	protein_coding	NP_998638.1	ZDB-GENE-040426-2835	-4.04121	1.03093	3.14929e-09	3.21705e-08	0.844921	2.07966	34	118	0.217334	0.466253	0.32388	0.620068
406794	NM_214767	ube2j1	ubiquitin-conjugating enzyme E2, J1	protein_coding	NP_999932.1	ZDB-GENE-040426-2853	-2.44497	3.53768	2.31954e-08	2.04987e-07	2.94871	4.12401	287	601	1.53259	3.30448	2.5969	5.26502
406812	NM_213092,XM_005167390	bzw1b	basic leucine zipper and W2 domains 1b	protein_coding	NP_998257.1;XP_005167447.1	ZDB-GENE-040426-2881	-2.42762	6.62116	1.14696e-09	1.2545e-08	5.86833	7.13332	2452	5097	23.2904	50.9822	39.4644	81.2297
406822	NM_213501,NM_213501_dup1	cab39l1	calcium binding protein 39, like 1	protein_coding	NP_998666.1	ZDB-GENE-040426-2897	-3.17292	3.56182	1.24913e-12	1.99038e-11	2.73192	4.2413	241	655	1.57699	4.41251	2.67212	7.03044
406823	NM_213502	eif3jb	eukaryotic translation initiation factor 3, subunit Jb	protein_coding	NP_998667.1	ZDB-GENE-040426-2900	-2.33695	5.03637	1.38817e-08	1.27444e-07	4.36783	5.55205	839	1679	7.37227	15.1636	12.4919	24.1601
406829	NM_213508,XM_005174315,XM_005174316,XM_021470469,XM_021470470,XR_002456666,XR_659939	far1	fatty acyl CoA reductase 1	protein_coding	NP_998673.1;XP_005174372.1;XP_005174373.1;XP_021326144.1;XP_021326145.1	ZDB-GENE-040426-2908	-2.11752	5.57065	3.34887e-07	2.43557e-06	4.97568	6.03373	1301	2359	4.33633	8.71665	7.34768	13.8882
406830	NM_001309531	zgc:55413	zgc:55413	protein_coding	NP_001296460.1	ZDB-GENE-040426-2909	-16.8604	2.14916	3.0639e-34	2.96972e-32	0.577005	3.2236	21	305	0.266225	4.05137	0.451105	6.45503
406840	NM_213519	sesn3	sestrin 3	protein_coding	NP_998684.2	ZDB-GENE-040426-2924	-2.08674	4.50913	1.21881e-06	7.86359e-06	3.97536	4.98819	629	1124	2.61825	4.8055	4.43649	7.65658
406849	NM_213528	trim36	tripartite motif containing 36	protein_coding	NP_998693.2	ZDB-GENE-040426-2936	2.43665	3.72536	2.15554e-08	1.9154e-07	4.29742	3.11394	797	280	3.5788	1.29224	6.06409	2.05892
407079	NM_001003727,XM_005156491	klhl31	kelch-like family member 31	protein_coding	NP_001003727.1;XP_005156548.1	ZDB-GENE-030131-2052	3.25631	0.9504	4.96759e-07	3.48859e-06	1.94742	0.906995	122	32	0.409302	0.110494	0.693541	0.17605
407086	NM_213556,XM_017353483	junba	jun B proto-oncogene a	protein_coding	NP_998721.2;XP_017208972.1	ZDB-GENE-040426-2172	-2.71072	7.05272	7.92626e-12	1.14895e-10	6.18066	7.60677	3055	7091	31.7136	75.6895	53.737	120.596
407619	XM_021470060,XM_021470061	psip1b	PC4 and SFRS1 interacting protein 1b, transcript variant X1	protein_coding	XP_021325735.1;XP_021325736.1	ZDB-GENE-030131-3273	2.27763	4.42262	7.36721e-08	6.01765e-07	4.94091	3.81198	1269	477	3.44923	1.3193	5.84453	2.10203
407623	NM_214777	b3gnt7l	UDP-GlcNAc:betaGal beta-1,3-N-acetylglucosaminyltransferase 7, like	protein_coding	NP_999942.1	ZDB-GENE-040718-143	-5.64705	4.22568	2.01909e-26	1.19965e-24	2.72683	5.03347	240	1161	2.3801	11.8511	4.03296	18.8823
407635	XM_682838	ptpn3	protein tyrosine phosphatase, non-receptor type 3	protein_coding	XP_687930.5	ZDB-GENE-030131-2934	-3.24751	5.15748	7.28099e-15	1.54532e-13	4.15297	5.79525	717	1994	2.73849	7.81972	4.64022	12.4591
407641	NM_001163994	si:dkey-37o8.1	si:dkey-37o8.1	protein_coding	NP_001157466.1	ZDB-GENE-030131-5667	-2.00269	0.929921	0.00232438	0.00709045	1.1642	1.80268	53	91	0.481292	0.847752	0.815523	1.35072
407643	XM_009291585,XM_021466355,XM_021466356,XM_021466357	LOC407643	alpha-2-macroglobulin-like protein 1, transcript variant X1	protein_coding	XP_009289860.1;XP_021322030.1;XP_021322031.1;XP_021322032.1	.	-9.35668	4.98555	2.91251e-42	4.28384e-40	2.8302	5.86325	261	2092	0.852711	7.04083	1.44487	11.2181
407655	NM_001039460,NM_001039460_dup1	zfpm1	zinc finger protein, FOG family member 1	protein_coding	NP_001034549.1	ZDB-GENE-050419-238	2.88962	0.0325572	0.00035419	0.00134084	1.28002	0.577503	61	18	0.223286	0.06416	0.378347	0.102226
407656	NM_001198761,NM_001198761_dup1,XM_021467139	shtn1	shootin 1	protein_coding	NP_001185690.1	ZDB-GENE-121127-1	-2.08573	1.78088	0.000124576	0.000527737	1.6786	2.484	94	168	0.846713	1.55466	0.838651	2.29292
407658	NM_214784	acta1b	actin, alpha 1b, skeletal muscle	protein_coding	NP_999949.2	ZDB-GENE-030131-55	3.23513	5.81522	3.16917e-15	6.97982e-14	6.44154	4.78424	3669	971	37.7551	10.2619	63.974	16.3502
407659	NM_214785,XM_005163338,XM_005163339,XM_005163340,XM_009298452,XM_021479658,XM_021479659	st3gal3b	ST3 beta-galactoside alpha-2,3-sialyltransferase 3b	protein_coding	NP_999950.1;XP_005163395.1;XP_005163396.1;XP_005163397.1;XP_009296727.1;XP_021335333.1;XP_021335334.1	ZDB-GENE-050411-13	3.29571	3.25262	1.12919e-12	1.81438e-11	3.9559	2.43377	620	161	3.73325	0.996929	6.32579	1.5884
407660	XR_082582	si:ch1073-322p19.1	si:ch1073-322p19.1	lncRNA	.	ZDB-GENE-091204-224	-2.04876	4.46824	2.30561e-06	1.40889e-05	3.95372	4.94016	619	1086	4.54069	8.1812	7.69395	13.0351
407661	XM_002660981	ncana	neurocan a	protein_coding	XP_002661027.3	ZDB-GENE-051230-1	2.55381	-0.633012	0.00759456	0.0200246	0.882056	0.409446	36	12	0.127128	0.041456	0.215412	0.066051
407676	NM_001083814	ptpro	protein tyrosine phosphatase, receptor type, O	protein_coding	NP_001077283.1	ZDB-GENE-070424-54	2.42506	5.15256	3.30946e-09	3.36596e-08	5.6802	4.4416	2147	758	7.46244	2.70502	12.6447	4.30989
407680	NM_001115105,XM_017353526,XM_021470602	si:zfos-1011f11.1	si:zfos-1011f11.1	protein_coding	NP_001108577.2;XP_017209015.1;XP_021326277.1	ZDB-GENE-080229-4	-3.0174	6.71904	5.26987e-14	1.00037e-12	5.73957	7.31477	2239	5785	12.1485	33.4644	20.585	53.3187
407681	NM_001083815	foxf2a	forkhead box F2a	protein_coding	NP_001077284.1	ZDB-GENE-110407-5	8.56189	1.85572	1.58509e-21	6.48622e-20	2.87694	0.797757	271	27	2.70277	0.277153	4.5797	0.441587
407684	NM_001089362,XM_021480049	vps25	vacuolar protein sorting 25 homolog (S. cerevisiae)	protein_coding	NP_001082831.2;XP_021335724.1	ZDB-GENE-050506-30	-2.30836	3.34857	2.38065e-07	1.79213e-06	2.83495	3.92279	262	518	5.77811	11.5885	9.79071	18.4639
407685	XM_005164095,XM_017354802,XM_021474550,XM_691769	itga3a	integrin, alpha 3a, transcript variant X3	protein_coding	XP_005164152.1;XP_017210291.1;XP_021330225.1;XP_696861.6	ZDB-GENE-090805-3	-3.81257	3.08498	4.2779e-15	9.29516e-14	2.17393	3.84805	150	490	0.594113	2.02456	1.00669	3.22572
407696	NM_001044315	ddx52	DEAD (Asp-Glu-Ala-Asp) box polypeptide 52	protein_coding	NP_001037780.2	ZDB-GENE-060623-1	-2.08984	3.67504	3.0154e-06	1.80589e-05	3.20831	4.18818	352	630	2.78718	5.12365	4.72272	8.16349
407698	NM_001161590,XM_009303471,XM_009303472,XM_009303473,XM_017356841	ano1	anoctamin 1, calcium activated chloride channel	protein_coding	NP_001155062.1;XP_009301746.1;XP_009301747.1;XP_009301748.1;XP_017212330.1	ZDB-GENE-121127-3	-3.81193	7.88804	1.06307e-19	3.71422e-18	6.63581	8.55562	4204	13722	14.8596	49.8835	25.1788	79.4792
407706	XM_009306854,XM_021480395	st6galnac	ST6 (alpha-N-acetyl-neuraminyl-2,3-beta-galactosyl-1,3)-N-acetylgalactosaminide alpha-2,6-sialyltransferase	protein_coding	XP_009305129.1	ZDB-GENE-050309-58	2.21806	1.41187	0.000122294	0.000519322	2.19621	1.386	153	59	0.910496	0.355399	1.54279	0.566257
407712	NM_001310068,NM_001310068_dup1,NM_214795,NM_214795_dup1	tph2	tryptophan hydroxylase 2 (tryptophan 5-monooxygenase)	protein_coding	NP_001296997.1;NP_999960.2	ZDB-GENE-040624-4	2.46605	0.785753	0.000145525	0.000605625	1.75064	0.968776	101	35	0.699552	0.24463	0.825824	0.252447
407718	NM_214797,NM_214797_dup1	zbtb1	zinc finger and BTB domain containing 1	protein_coding	NP_999962.1	ZDB-GENE-041001-126	-2.79219	1.56949	3.82491e-07	2.75134e-06	1.34795	2.41169	66	158	0.342843	0.840382	0.576472	1.19836
407729	NM_001013273	caprin2	caprin family member 2	protein_coding	NP_001013291.1	ZDB-GENE-040812-2	-4.2542	2.39575	6.51514e-15	1.38838e-13	1.58035	3.24456	85	310	0.359887	1.35596	0.60981	2.16044
407983	NM_214814,NM_214814_dup1,XM_005156475,XM_005156476	tp53bp2a	tumor protein p53 binding protein, 2a	protein_coding	NP_999979.1	ZDB-GENE-040516-8	-3.66037	5.17393	1.62241e-17	4.50186e-16	4.0425	5.84963	661	2072	2.10207	6.75384	2.84113	2.35362
408256	NM_001001409	actc1a	actin, alpha, cardiac muscle 1a	protein_coding	NP_001001409.2	ZDB-GENE-040520-4	2.0012	3.21693	2.12052e-05	0.000106701	3.73521	2.83861	526	225	6.26549	2.74125	10.6165	4.36762
414843	NM_001001828	rnf114	ring finger protein 114	protein_coding	NP_001001828.2	ZDB-GENE-040813-1	-2.2562	3.4264	4.41947e-07	3.1393e-06	2.92221	3.98641	281	543	3.56689	7.09314	6.0439	11.3015
414846	NM_001007290,NM_001007290_dup1	rnf141	ring finger protein 141	protein_coding	NP_001007291.2	ZDB-GENE-040625-71	-2.208	4.24552	2.45042e-07	1.83808e-06	3.6783	4.75823	504	953	2.97174	5.77443	4.26908	9.20038
415097	NM_001001837,XM_009291105,XR_002459911,XR_002459912,XR_225086,XR_658192,XR_658193	zic6	zic family member 6	protein_coding	NP_001001837.1;XP_009289380.1	ZDB-GENE-061207-1	-2.48724	3.23692	2.92495e-08	2.54743e-07	2.67487	3.84805	230	490	1.75025	4.31981	2.96571	6.88274
415099	NM_001001839,XM_005170796	rela	v-rel reticuloendotheliosis viral oncogene homolog A	protein_coding	NP_001001839.2;XP_005170853.1	ZDB-GENE-040825-4	-3.20978	2.94931	8.62311e-12	1.24396e-10	2.21816	3.67042	156	429	0.742075	2.12285	1.25741	3.38233
415108	NM_001001848	popdc3	popeye domain containing 3	protein_coding	NP_001001848.1	ZDB-GENE-040624-10	-4.15742	0.24651	4.41813e-07	3.1393e-06	0.530986	1.51585	19	68	0.102272	0.374293	0.173295	0.596359
415139	NM_001002049	cryba2a	crystallin, beta A2a	protein_coding	NP_001002049.1	ZDB-GENE-040625-8	-16.869	10.0882	2.76007e-69	1.35006e-66	6.9406	11.0058	5203	75154	77.0378	1142.83	130.537	1820.87
415152	NM_001002062,XM_009297232	gyg1b	glycogenin 1b	protein_coding	NP_001002062.1;XP_009295507.1	ZDB-GENE-040625-30	-2.58504	7.56069	5.99681e-11	7.7619e-10	6.73206	8.09393	4497	9954	48.2973	109.598	81.8372	174.622
415161	NM_001002071,XM_021479673,XM_021479674,XM_021479677	sirt6	sirtuin 6	protein_coding	NP_001002071.1;XP_021335348.1;XP_021335349.1;XP_021335352.1	ZDB-GENE-031007-2	2.09967	3.43712	4.17481e-06	2.43305e-05	3.96242	2.9903	623	254	6.85313	2.89525	11.6123	4.61299
415164	XM_009297927,XM_021473834	zgc:86725	zgc:86725	protein_coding	XP_021329509.1	ZDB-GENE-040625-46	2.07348	2.38786	4.29264e-05	0.000201085	2.99606	2.12559	298	123	3.34888	1.4109	5.6745	2.24798
415166	NM_001002076	fabp6	fatty acid binding protein 6, ileal (gastrotropin)	protein_coding	NP_001002076.1	ZDB-GENE-040625-49	10.5623	1.7027	6.09107e-23	2.85967e-21	2.76709	0.629436	248	20	7.25735	0.599227	12.2972	0.954746
415175	NM_001002085	tnnc1b	troponin C type 1b (slow)	protein_coding	NP_001002085.1	ZDB-GENE-040625-62	2.07776	2.6246	2.52574e-05	0.000125027	3.20831	2.31193	352	145	6.99261	2.94404	11.8486	4.69073
415180	NM_001002090,NM_001002090_dup1,XM_005156237,XM_005156238,XM_005156239,XM_005156240	cbx1b	chromobox homolog 1b (HP1 beta homolog Drosophila)	protein_coding	NP_001002090.1	ZDB-GENE-040625-68	2.07766	3.85381	3.12884e-06	1.86957e-05	4.35303	3.37198	830	342	8.80762	3.85536	12.942	4.47366
415190	NM_001002100,XM_005164011	zgc:86896	zgc:86896	protein_coding	NP_001002100.1;XP_005164068.1	ZDB-GENE-040625-80	-2.24948	6.41058	2.58989e-08	2.27635e-07	5.73704	6.89158	2235	4305	24.164	47.8663	40.9447	76.2652
415192	NM_001002102	pnp4a	purine nucleoside phosphorylase 4a	protein_coding	NP_001002102.1	ZDB-GENE-040625-83	2.52651	1.67883	3.42935e-06	2.03182e-05	2.45838	1.47385	192	65	1.67736	0.582088	2.84219	0.927438
415207	NM_001002117	rbks	ribokinase	protein_coding	NP_001002117.1	ZDB-GENE-040625-112	-2.4919	1.74416	2.9748e-06	1.7831e-05	1.53443	2.51884	81	173	1.00117	2.20787	1.69644	3.51778
415213	NM_001002123	ralbb	v-ral simian leukemia viral oncogene homolog Bb (ras related)	protein_coding	NP_001002123.1	ZDB-GENE-040625-121	-2.30847	1.84912	1.12898e-05	5.98283e-05	1.65733	2.5795	92	182	1.78784	3.65028	3.02939	5.81597
415222	NM_001002132	plppr1	phospholipid phosphatase related 1	protein_coding	NP_001002132.1	ZDB-GENE-040625-138	2.56796	3.49706	5.86424e-09	5.7342e-08	4.10077	2.86593	690	230	10.8438	3.71346	18.3743	5.91664
415223	NM_001002133,NM_001002133_dup1,NM_001002133_dup2	trim63a	tripartite motif containing 63a	protein_coding	NP_001002133.1	ZDB-GENE-040625-139	-2.91569	1.57113	1.29544e-07	1.01972e-06	1.32116	2.42645	64	160	0.650601	1.67935	0.911089	0.22248
415228	NM_001002138,XM_021472162	crygm2d6	crystallin, gamma M2d6	protein_coding	NP_001002138.1	ZDB-GENE-040625-145	2.73808	2.44274	2.53045e-08	2.22784e-07	3.14861	1.95291	336	105	8.13116	2.62778	13.7778	4.18684
415235	NM_001002145	cab39	calcium binding protein 39	protein_coding	NP_001002145.1	ZDB-GENE-040625-158	-5.4542	1.74806	1.13881e-15	2.64085e-14	1.02172	2.72981	44	206	0.37881	1.85887	0.641874	2.96173
415240	NM_001002150	cav2	caveolin 2	protein_coding	NP_001002150.1	ZDB-GENE-040625-164	-3.16703	4.41977	1.04017e-13	1.90574e-12	3.49269	5.06563	438	1188	4.01986	11.1997	6.81144	17.8444
431720	NM_001002173,NM_001002173_dup1,XR_001797330	nr4a1	nuclear receptor subfamily 4, group A, member 1	protein_coding	NP_001002173.1	ZDB-GENE-040704-11	-2.46066	2.29279	6.25054e-07	4.30477e-06	1.92979	2.98533	120	253	0.632858	1.37334	1.07234	2.18814
431723	NM_001002176,XM_009306814,XM_021480050	tha1	threonine aldolase 1	protein_coding	NP_001002176.1;XP_009305089.1;XP_021335725.1	ZDB-GENE-040704-14	-2.32124	2.75817	7.64482e-07	5.16688e-06	2.33659	3.37958	173	344	1.71127	3.69358	2.89965	5.88497
431725	NM_001002178,XM_005167363,XM_017357313,XM_017357314	zgc:91909	zgc:91909	protein_coding	NP_001002178.1;XP_005167420.1;XP_017212802.1;XP_017212803.1	ZDB-GENE-040704-16	-2.23768	3.04026	1.23777e-06	7.97364e-06	2.59884	3.62317	216	414	2.6895	5.29637	4.55722	8.43868
431726	NM_001002179,XM_005158776	zgc:91908	zgc:91908	protein_coding	NP_001002179.1;XP_005158833.1	ZDB-GENE-040704-17	-2.22802	4.60076	1.21708e-07	9.60914e-07	4.00091	5.10629	641	1223	3.76038	7.37087	6.37176	11.744
431730	NM_001002183,NM_001002183_dup1,XM_005164442,XM_021470182	cdc42ep4a	CDC42 effector protein (Rho GTPase binding) 4a	protein_coding	NP_001002183.1	ZDB-GENE-040704-22	2.90085	2.23607	1.00401e-08	9.42322e-08	2.9833	1.75671	295	87	1.60536	0.442082	1.77989	0.704368
431733	NM_001002186,NM_001002186_dup1,NM_001002186_dup2	tspan9b	tetraspanin 9b	protein_coding	NP_001002186.1	ZDB-GENE-040704-25	-2.54247	2.22741	3.66826e-07	2.64772e-06	1.85705	2.93977	112	244	0.930382	2.08727	1.57648	2.45685
431739	NM_001002192	cmah	cytidine monophospho-N-acetylneuraminic acid hydroxylase	protein_coding	NP_001002192.1	ZDB-GENE-040704-33	4.31509	0.122928	1.91127e-06	1.18794e-05	1.41283	0.467668	71	14	0.505614	0.103232	0.856737	0.164479
431748	NM_001002201,XM_009305664	dbnla	drebrin-like a	protein_coding	NP_001002201.1;XP_009303939.1	ZDB-GENE-040704-42	-2.68286	5.82625	2.25562e-11	3.10487e-10	4.99063	6.38575	1315	3021	11.9184	28.2633	20.1952	45.0318
431755	NM_001002208,XM_009295188	tpgs2	tubulin polyglutamylase complex subunit 2	protein_coding	NP_001002208.1;XP_009293463.1	ZDB-GENE-040704-49	2.09142	3.04718	9.14467e-06	4.95211e-05	3.59687	2.65661	474	194	6.73693	2.8284	11.4154	4.50648
431757	NM_001002210	spag6	sperm associated antigen 6	protein_coding	NP_001002210.1	ZDB-GENE-040704-53	2.20519	0.507384	0.00174499	0.0055092	1.52272	0.885799	80	31	0.708657	0.276626	1.20078	0.440747
431761	NM_001320372,NR_135219,XM_021478638,XR_662650	tfcp2l1	transcription factor CP2-like 1	protein_coding	NP_001307301.1;XP_021334313.1	ZDB-GENE-040704-58	2.08386	1.25251	0.000567173	0.00203399	2.04887	1.32432	134	55	1.03977	0.410656	1.76184	0.654296
431764	NM_001002217	cpa4	carboxypeptidase A4	protein_coding	NP_001002217.1	ZDB-GENE-040704-61	3.6423	1.31319	5.79683e-09	5.6762e-08	2.26108	1.02802	162	38	1.78768	0.426411	3.02912	0.679398
431776	NM_001002229,XM_005162844	snx7	sorting nexin 7	protein_coding	NP_001002229.2;XP_005162901.1	ZDB-GENE-040704-77	-2.59377	4.33563	6.0299e-10	6.83702e-09	3.61077	4.91161	479	1064	2.88358	6.10434	4.88608	9.72602
431777	NM_001002230,XM_021479153	tuba7l	tubulin, alpha 7 like	protein_coding	NP_001002230.1;XP_021334828.1	ZDB-GENE-040704-78	5.85319	2.75214	2.34655e-21	9.43688e-20	3.63	1.55665	486	71	3.45765	0.515077	5.8588	0.82067
432385	NM_001002308	spp1	secreted phosphoprotein 1	protein_coding	NP_001002308.1	ZDB-GENE-050706-97	-7.26414	1.23773	1.97685e-16	4.89165e-15	0.643394	2.35112	24	150	0.248348	1.6092	0.420813	2.56393
432387	NM_001002310,XM_009294193,XM_017353790	pkd2	polycystic kidney disease 2	protein_coding	NP_001002310.1;XP_009292468.1;XP_017209279.1	ZDB-GENE-040827-4	-3.83617	1.23741	1.40364e-09	1.51554e-08	0.970915	2.2302	41	135	0.164535	0.558223	0.278796	0.889415
432388	NM_001002311,NM_001002311_dup1,XM_005171374	lrrc6	leucine rich repeat containing 6	protein_coding	NP_001002311.1	ZDB-GENE-040827-2	2.30435	-0.0502599	0.00564883	0.0155188	1.17919	0.629436	54	20	0.476239	0.201506	0.772854	0.21936
432389	NM_001002312	ift172	intraflagellar transport 172	protein_coding	NP_001002312.1	ZDB-GENE-040827-1	2.13761	5.48037	2.6023e-07	1.94437e-06	5.9482	4.87846	2594	1039	7.10985	2.92461	12.0473	4.65977
436584	NM_001242770	gcgb	glucagon b	protein_coding	NP_001229699.1	ZDB-GENE-040712-2	3.77518	2.60476	2.7263e-13	4.71178e-12	3.3933	1.81394	406	92	10.6374	2.46543	18.0245	3.92817
436585	NM_001002314	hic1	hypermethylated in cancer 1	protein_coding	NP_001002314.1	ZDB-GENE-040713-2	2.51793	1.41381	1.06385e-05	5.67196e-05	2.23978	1.30847	159	54	0.978254	0.336874	1.6576	0.53674
436586	NM_001002315	ccm2	cerebral cavernous malformation 2	protein_coding	NP_001002315.1	ZDB-GENE-040712-6	-3.75826	1.46759	4.18994e-10	4.83949e-09	1.1026	2.41169	49	158	0.331989	1.09813	0.562538	1.74965
436598	NM_001002326	pls3	plastin 3 (T isoform)	protein_coding	NP_001002326.1	ZDB-GENE-040718-10	-3.96972	6.91542	1.49837e-20	5.69896e-19	5.63128	7.59845	2074	7050	13.2617	46.3	22.4712	73.7696
436603	NM_001002331	agxta	alanine-glyoxylate aminotransferase a	protein_coding	NP_001002331.1	ZDB-GENE-040718-16	3.34452	-0.1544	0.000216832	0.000863429	1.19403	0.467668	55	14	0.612694	0.1568	1.03818	0.249828
436615	NM_001002343,XM_005171375,XM_021479745	gbp1	guanylate binding protein 1	protein_coding	NP_001002343.1;XP_005171432.1;XP_021335420.1	ZDB-GENE-040718-32	-4.43335	6.1425	3.67966e-23	1.77918e-21	4.75449	6.86102	1110	4214	7.30041	28.3828	12.3702	45.2222
436617	NM_001002345,XM_005160666	rxrgb	retinoid X receptor, gamma b	protein_coding	NP_001002345.1;XP_005160723.1	ZDB-GENE-040718-34	2.00217	2.84944	3.87127e-05	0.000183182	3.39651	2.52571	407	174	3.42742	1.51884	5.80758	2.41997
436631	NM_001002358	trim55a	tripartite motif containing 55a	protein_coding	NP_001002358.1	ZDB-GENE-040718-50	3.94146	2.13757	1.39009e-12	2.20329e-11	2.9833	1.45957	295	64	2.7602	0.611623	4.67702	0.974496
436632	NM_001002359	sccpdha	saccharopine dehydrogenase a	protein_coding	NP_001002359.1	ZDB-GENE-040718-51	-3.60049	2.66361	5.73379e-13	9.56375e-12	1.90294	3.44263	117	361	1.00714	3.20472	1.70654	5.10607
436636	NM_001002363	cd36	CD36 molecule (thrombospondin receptor)	protein_coding	NP_001002363.1	ZDB-GENE-040718-55	3.54814	2.47177	4.51434e-12	6.7532e-11	3.25506	1.76834	365	88	3.32892	0.822959	5.64068	1.31122
436644	NM_001002371,NM_001002371_dup1	eef1a2	eukaryotic translation elongation factor 1 alpha 2	protein_coding	NP_001002371.1	ZDB-GENE-040718-64	2.89667	2.5555	2.46814e-09	2.56104e-08	3.26914	1.99311	369	109	2.81255	0.846513	2.80595	0.986204
436646	NM_001002373,NM_001002373_dup1,NM_001002373_dup2,XM_021480558	galm	galactose mutarotase	protein_coding	NP_001002373.1	ZDB-GENE-040718-66	-2.07764	1.58271	0.000230031	0.000909784	1.54605	2.31985	82	146	0.903365	1.73502	0.827128	1.6688
436649	NM_001002376,NM_001002376_dup1,NM_001002376_dup2,XM_005158508	ppp1r3ca	protein phosphatase 1, regulatory subunit 3Ca	protein_coding	NP_001002376.1	ZDB-GENE-040718-70	-2.99703	3.28822	2.98115e-11	4.03492e-10	2.55352	3.96383	208	534	1.68877	4.38559	1.24914	1.79526
436656	NM_001002383	krt97	keratin 97	protein_coding	NP_001002383.1	ZDB-GENE-040718-78	-3.33621	11.507	1.36947e-16	3.44546e-15	10.3916	12.1291	57325	163756	597.509	1752.84	1012.45	2792.8
436672	NM_001002399,NM_001002399_dup1,XM_005162686	pdha1b	pyruvate dehydrogenase (lipoamide) alpha 1b	protein_coding	NP_001002399.1	ZDB-GENE-040718-96	2.4418	5.82373	1.33885e-09	1.44856e-08	6.34469	5.08203	3428	1202	30.9875	11.1521	29.2092	10.4247
436676	NM_001002403	dnase1l1l	deoxyribonuclease I-like 1-like	protein_coding	NP_001002403.1	ZDB-GENE-040718-100	-15.8181	4.69127	6.24423e-56	1.72809e-53	2.02417	5.6314	131	1776	1.84894	25.7874	3.13293	41.0869
436679	NM_001002406	nr4a2b	nuclear receptor subfamily 4, group A, member 2b	protein_coding	NP_001002406.1	ZDB-GENE-040718-103	2.51221	3.27412	2.122e-08	1.88878e-07	3.88221	2.69368	587	200	4.21623	1.47241	7.14418	2.34599
436680	NM_001002407,XM_021468047	lim2.4	lens intrinsic membrane protein 2.4	protein_coding	NP_001002407.1;XP_021323722.1	ZDB-GENE-040718-104	-5.21147	5.3745	1.54789e-26	9.30195e-25	3.84273	6.14105	570	2544	9.16922	42.7497	15.5368	68.1129
436682	NM_001002409,XM_005162967,XM_009297758,XM_021470473,XM_021470474,XM_021470475,XM_021470476	rbpms2a	RNA binding protein with multiple splicing 2a	protein_coding	NP_001002409.1;XP_005163024.1;XP_009296033.1;XP_021326148.1;XP_021326149.1;XP_021326150.1;XP_021326151.1	ZDB-GENE-040718-106	2.48852	6.77664	3.94749e-10	4.57957e-09	7.29765	5.9959	6676	2297	26.8246	8.54305	45.4529	13.6116
436683	NM_001002410,XM_005157649	cryba1a	crystallin, beta A1a	protein_coding	NP_001002410.1;XP_005157706.1	ZDB-GENE-040718-107	-14.1994	11.3705	8.57522e-63	2.8629e-60	8.44871	12.2726	14878	180891	234.983	2982.69	398.166	4752.3
436687	NM_001002414	cabp1b	calcium binding protein 1b	protein_coding	NP_001002414.1	ZDB-GENE-040718-111	9.56248	0.745138	9.50579e-15	1.98545e-13	1.96483	0.37943	124	11	1.43637	0.127288	2.43385	0.202807
436688	NM_001002415	vps26bl	vacuolar protein sorting 26 homolog B, like	protein_coding	NP_001002415.1	ZDB-GENE-040718-112	-3.465	1.86497	3.1559e-10	3.72283e-09	1.38722	2.72385	69	205	0.731825	2.24931	1.24004	3.58381
436697	NM_001002424,XM_009296974	slc48a1a	solute carrier family 48 (heme transporter), member 1a	protein_coding	NP_001002424.1;XP_009295249.1	ZDB-GENE-040718-121	-2.42537	1.03216	7.68284e-05	0.000340555	1.11825	1.94268	50	104	0.75128	1.66863	1.273	2.65863
436716	NM_001002443,NM_001002443_dup1	opn1lw2	opsin 1 (cone pigments), long-wave-sensitive, 2	protein_coding	NP_001002443.1	ZDB-GENE-040718-141	-4.70348	8.32808	2.17411e-25	1.23256e-23	6.82885	9.05258	4812	19380	47.4082	196.092	80.3307	312.432
436720	NM_001002447,XM_005156283,XM_005156285,XM_017358446	myoz1b	myozenin 1b	protein_coding	NP_001002447.1;XP_005156340.1;XP_005156342.1;XP_017213935.1	ZDB-GENE-040718-146	2.48036	3.1571	4.35904e-08	3.6806e-07	3.76782	2.60567	539	186	6.51747	2.35118	11.0435	3.74613
436723	NM_001002450,NM_001002450_dup1,XM_021480052	meox1	mesenchyme homeobox 1	protein_coding	NP_001002450.2;XP_021335727.1	ZDB-GENE-040718-149	11.5807	-0.738793	3.7089e-07	2.67338e-06	0.988048	0.113759	42	3	0.288025	0.021138	0.186825	0
436732	NM_001002459,XM_021471102	cplx2l	complexin 2, like	protein_coding	NP_001002459.1;XP_021326777.1	ZDB-GENE-040718-160	2.25682	6.42057	2.33392e-08	2.06084e-07	6.90242	5.74316	5066	1922	43.2599	16.9921	73.3016	27.0735
436739	NM_001002466,NM_001002466_dup1,XM_021479154,XM_021479155	brap	BRCA1 associated protein	protein_coding	NP_001002466.1	ZDB-GENE-040718-168	-8.33351	5.08821	3.92628e-39	5.06635e-37	3.05008	5.94749	311	2220	2.37002	17.453	3.55228	27.8078
436765	NM_001002492,NM_001002492_dup1	cmtm4	CKLF-like MARVEL transmembrane domain containing 4	protein_coding	NP_001002492.1	ZDB-GENE-040718-195	-12.1634	1.7119	5.40186e-26	3.12996e-24	0.577005	2.81076	21	220	0.218152	2.38773	0.140991	3.80436
436766	NM_001002493,XM_005160857	jdp2b	Jun dimerization protein 2b	protein_coding	NP_001002493.1;XP_005160914.1	ZDB-GENE-040718-197	-17.5419	3.55656	1.23994e-49	2.60796e-47	1.17919	4.53816	54	813	0.763755	11.9179	1.29414	18.9887
436767	NM_001002494,NM_001002494_dup1	rergla	RERG/RAS-like a	protein_coding	NP_001002494.1	ZDB-GENE-040718-198	3.18556	2.00753	2.53617e-09	2.62451e-08	2.81108	1.52958	257	69	2.85912	0.782497	4.84464	1.24675
436805	NM_001002532	zgc:92912	zgc:92912	protein_coding	NP_001002532.1	ZDB-GENE-040718-265	2.04059	0.919741	0.00176917	0.00557719	1.79025	1.13967	105	44	1.56914	0.665658	2.65882	1.06059
436822	NM_001002549	itm2ca	integral membrane protein 2Ca	protein_coding	NP_001002549.1	ZDB-GENE-040718-284	2.50782	4.72784	1.40728e-09	1.5187e-08	5.27778	4.00619	1614	551	22.1562	7.76197	37.5426	12.3671
436825	NM_001002552,XM_009296202	s100b	S100 calcium binding protein, beta (neural)	protein_coding	NP_001002552.1;XP_009294477.1	ZDB-GENE-040718-290	2.0246	2.70403	4.36129e-05	0.000203756	3.26914	2.39679	369	156	4.65473	2.01262	7.88719	3.2067
436834	NM_001002561,NM_001002561_dup1,NM_001002561_dup2	clic2	chloride intracellular channel 2	protein_coding	NP_001002561.1	ZDB-GENE-040718-299	3.32183	2.05322	5.96635e-10	6.76862e-09	2.86308	1.52958	268	69	3.00438	0.791342	1.7999	1.26084
436842	NM_001002569	tpmt.1	thiopurine S-methyltransferase, tandem duplicate 1	protein_coding	NP_001002569.2	ZDB-GENE-050522-141	-2.71436	4.62607	5.67328e-11	7.3658e-10	3.83565	5.21119	567	1318	9.22031	22.0186	15.6233	35.0821
436849	NM_001002576,NM_001002576_dup1,NM_001012315,NM_001012315_dup1	hrsp12	heat-responsive protein 12	protein_coding	NP_001002576.2;NP_001012315.1	ZDB-GENE-040718-315	-2.60013	3.40822	3.75511e-09	3.80266e-08	2.7819	4.0257	251	559	3.37776	7.68557	4.61324	1.1691
436852	NM_001002579	gcshb	glycine cleavage system protein H (aminomethyl carrier), b	protein_coding	NP_001002579.1	ZDB-GENE-040718-319	-3.0783	4.76574	1.82938e-13	3.23883e-12	3.84037	5.39307	569	1500	9.1128	24.6607	15.4412	39.2918
436857	NM_001002584,XM_005167477	cryba2b	crystallin, beta A2b	protein_coding	NP_001002584.1;XP_005167534.1	ZDB-GENE-040718-324	-9.34619	9.22069	2.18457e-47	4.25446e-45	6.86204	10.0753	4925	39414	104.146	846.101	176.469	1348.09
436859	NM_001002586	cryba1b	crystallin, beta A1b	protein_coding	NP_001002586.1	ZDB-GENE-040718-326	-2.369	5.71422	4.62097e-09	4.60848e-08	5.00648	6.22468	1330	2698	20.017	41.6987	33.9177	66.4383
436860	NM_001002587	lim2.3	lens intrinsic membrane protein 2.3	protein_coding	NP_001002587.1	ZDB-GENE-040718-327	-11.7981	6.38107	4.96329e-53	1.15992e-50	3.80938	7.27278	556	5618	11.3693	118.026	19.2647	188.05
436863	NM_001002590	hrasls	HRAS-like suppressor	protein_coding	NP_001002590.2	ZDB-GENE-040718-330	-6.65752	3.1551	3.37719e-26	1.97312e-24	1.73042	4.04016	99	565	1.85212	10.9529	3.13832	17.4513
436869	NM_001002596	zgc:92313	zgc:92313	protein_coding	NP_001002596.1	ZDB-GENE-040718-339	-3.45743	3.26852	1.14906e-13	2.09611e-12	2.40835	3.99138	184	545	1.93242	5.89089	3.27438	9.38593
436895	NM_001002622	irf8	interferon regulatory factor 8	protein_coding	NP_001002622.1	ZDB-GENE-040718-367	-3.88431	4.17364	1.3023e-17	3.68162e-16	3.0663	4.89048	315	1048	2.83827	9.70083	4.8093	15.4563
436897	NM_001002624	cldn11a	claudin 11a	protein_coding	NP_001002624.1	ZDB-GENE-040718-369	3.23153	2.25074	4.39972e-10	5.05956e-09	3.02954	1.6849	306	81	3.7239	1.01244	6.30996	1.61311
436907	NM_001002634,NM_001002634_dup1	nipal3	NIPA-like domain containing 3	protein_coding	NP_001002634.1	ZDB-GENE-040718-379	-4.27621	5.01801	5.08169e-21	1.99781e-19	3.73013	5.74095	524	1919	2.98241	11.2173	3.98204	8.33435
436908	NM_001002635	slc17a9b	solute carrier family 17 (vesicular nucleotide transporter), member 9b	protein_coding	NP_001002635.1	ZDB-GENE-040718-380	2.22155	0.469242	0.00187015	0.0058473	1.49902	0.864287	78	30	0.518133	0.20315	0.877949	0.323679
436917	NM_001002644	notum1b	notum pectinacetylesterase homolog 1b (Drosophila)	protein_coding	NP_001002644.1	ZDB-GENE-040718-391	3.41703	1.12774	8.65196e-08	7.00719e-07	2.09705	0.968776	140	35	0.896986	0.225963	1.5199	0.360025
436921	NM_001002648	slc38a5b	solute carrier family 38, member 5b	protein_coding	NP_001002648.1	ZDB-GENE-040718-395	-3.00218	5.52365	1.56026e-13	2.78582e-12	4.58326	6.1287	981	2522	5.6256	14.8549	9.53228	23.6682
436923	NM_001002650,XM_009298725,XM_017358225	crlf1a	cytokine receptor-like factor 1a	protein_coding	NP_001002650.1;XP_009297000.1;XP_017213714.1	ZDB-GENE-040718-397	-2.46537	4.00569	6.95461e-09	6.71608e-08	3.35749	4.57339	395	834	2.37819	5.25145	4.02972	8.36711
436924	NM_001002651	limk2	LIM domain kinase 2	protein_coding	NP_001002651.1	ZDB-GENE-040718-398	-2.84414	6.65869	9.65022e-13	1.56133e-11	5.74273	7.23321	2244	5465	9.82762	24.582	16.6524	39.1664
436926	NM_001002653	serpinb1	serpin peptidase inhibitor, clade B (ovalbumin), member 1	protein_coding	NP_001002653.1	ZDB-GENE-040718-400	-10.7428	9.49802	2.29493e-52	5.19025e-50	6.95592	10.3707	5259	48376	65.1557	615.571	110.403	980.786
436937	NM_001002664,XM_021468809	nipal4	NIPA-like domain containing 4	protein_coding	NP_001002664.1;XP_021324484.1	ZDB-GENE-040718-412	-9.34344	3.95739	4.7727e-38	5.73624e-36	1.99904	4.85956	128	1025	0.663745	5.49862	1.12468	8.76092
436939	NM_001002666,XM_021477460	slc1a1	solute carrier family 1 (neuronal/epithelial high affinity glutamate transporter, system Xag), member 1	protein_coding	NP_001002666.2;XP_021333135.1	ZDB-GENE-040718-414	2.71987	2.52773	1.82125e-08	1.63983e-07	3.22286	2.02254	356	112	1.9507	0.625653	3.30536	0.996851
436943	NM_001002670,NM_001002670_dup1,XM_021476081	cryabb	crystallin, alpha B, b	protein_coding	NP_001002670.1;XP_021331756.1	ZDB-GENE-040718-419	-2.94459	6.4314	2.02677e-13	3.56728e-12	5.48357	7.02025	1868	4710	13.3618	34.8025	22.6408	55.4507
436952	NM_001002679,XM_005168476	rab3db	RAB3D, member RAS oncogene family, b	protein_coding	NP_001002679.1;XP_005168533.1	ZDB-GENE-040718-428	-16.0775	1.69758	1.3531e-28	9.33104e-27	0.459082	2.82197	16	222	0.144919	2.21692	0.245557	3.5322
436958	NM_001002685,NM_001002685_dup1,XM_021468810	gpat3	glycerol-3-phosphate acyltransferase 3	protein_coding	NP_001002685.1;XP_021324485.1	ZDB-GENE-040718-436	-2.94237	0.914464	3.09886e-06	1.85323e-05	0.953575	1.91156	40	101	0.366828	0.775378	0.62157	0.811802
436969	NM_001002696,NM_001002696_dup1,XM_005157419	zgc:92630	zgc:92630	protein_coding	NP_001002696.1	ZDB-GENE-040718-449	-2.08007	5.68042	5.94005e-07	4.10977e-06	5.09909	6.13376	1421	2531	21.0806	41.7596	35.72	41.2809
436975	NM_001002702,XM_005168498	crebl2	cAMP responsive element binding protein-like 2	protein_coding	NP_001002702.2;XP_005168555.1	ZDB-GENE-040718-456	-2.57948	3.77156	2.08771e-09	2.18679e-08	3.10608	4.36708	325	718	6.92947	17.0244	11.7416	27.1249
436979	NM_001002706,XM_005173116	lygl1	lysozyme g-like 1	protein_coding	NP_001002706.1;XP_005173173.1	ZDB-GENE-040718-461	-2.91459	5.46356	8.44876e-13	1.38075e-11	4.55623	6.0588	962	2401	18.8051	48.2373	31.8643	76.8563
436988	NM_001002715	zgc:92360	zgc:92360	protein_coding	NP_001002715.1	ZDB-GENE-040718-470	-2.4543	4.50368	4.00181e-09	4.035e-08	3.81899	5.05262	560	1177	3.39951	7.3417	5.76029	11.6975
436996	NM_001002723	zgc:92594	zgc:92594	protein_coding	NP_001002723.1	ZDB-GENE-040718-482	-3.42523	4.49974	2.16309e-15	4.86754e-14	3.48667	5.16905	436	1279	4.59788	13.8645	7.79086	22.0903
437008	NM_001002735,NM_001002735_dup1,XM_021477464,XM_021477465,XM_021477466,XM_021477467	lctla	lactase-like a	protein_coding	NP_001002735.1;XP_021333139.1;XP_021333140.1;XP_021333141.1;XP_021333142.1	ZDB-GENE-040718-233	-50.0311	9.19237	5.44373e-113	8.80754e-110	4.58044	10.165	979	41945	6.12223	278.811	5.92949	171.359
437012	NM_001002739	hid1b	HID1 domain containing b	protein_coding	NP_001002739.1	ZDB-GENE-040718-239	-4.8979	-0.747061	4.94043e-05	0.000228328	0.247725	0.948475	8	34	0.041073	0.200662	0.069596	0.319713
437014	NM_001002741,NM_001002741_dup1,XM_005169285	rnpep	arginyl aminopeptidase (aminopeptidase B)	protein_coding	NP_001002741.1	ZDB-GENE-040718-241	-2.16333	2.72127	6.5307e-06	3.65223e-05	2.3631	3.31761	177	328	1.32726	2.50391	1.56969	2.61493
437017	NM_001002744	abhd17b	abhydrolase domain containing 17B	protein_coding	NP_001002744.1	ZDB-GENE-040718-244	-4.24881	1.57763	5.36278e-12	7.95454e-11	1.08678	2.53254	48	175	0.521341	1.97857	0.883385	3.15245
437022	NM_001002749	tyrp1b	tyrosinase-related protein 1b	protein_coding	NP_001002749.1	ZDB-GENE-040718-249	2.72183	5.54499	1.57969e-11	2.21209e-10	6.11248	4.70325	2912	916	22.4901	7.26295	38.1083	11.572
442930	NM_001002873	ctdp1	CTD (carboxy-terminal domain, RNA polymerase II, polypeptide A) phosphatase, subunit 1	protein_coding	NP_001002873.1	ZDB-GENE-040720-1	-3.34784	1.2806	3.26828e-08	2.82888e-07	1.07079	2.2302	47	135	0.250886	0.745319	0.425113	1.18751
445029	NM_001003423	tnni2b.2	troponin I type 2b (skeletal, fast), tandem duplicate 2	protein_coding	NP_001003423.1	ZDB-GENE-040801-9	3.12073	2.7608	8.81083e-11	1.11638e-09	3.48063	2.08896	434	119	8.77526	2.45359	14.8692	3.9093
445034	NM_001003428	crygn2	crystallin, gamma N2	protein_coding	NP_001003428.1	ZDB-GENE-040801-16	-4.019	6.79337	7.79954e-21	3.03231e-19	5.49784	7.48057	1887	6494	30.0347	106.153	50.8922	169.133
445048	NM_001003442	dnal1	dynein, axonemal, light chain 1	protein_coding	NP_001003442.1	ZDB-GENE-040801-178	2.80115	2.62097	5.83613e-09	5.70936e-08	3.31739	2.07029	383	117	3.75603	1.17691	6.36439	1.87517
445049	NM_001003729	zgc:92137	zgc:92137	protein_coding	NP_001003729.1	ZDB-GENE-040801-179	6.86497	0.4548	9.35417e-11	1.18237e-09	1.70991	0.409446	97	12	0.946916	0.112121	1.6045	0.178642
445051	NM_001003445	krt91	keratin 91	protein_coding	NP_001003445.1	ZDB-GENE-040801-181	-2.28946	12.9247	8.00281e-09	7.6441e-08	12.2071	13.402	201883	395761	2073.56	4174.44	3513.53	6651.12
445063	NM_001003457,XR_002459132	zgc:92429	zgc:92429	protein_coding	NP_001003457.1	ZDB-GENE-040801-194	2.14564	1.37949	0.000224054	0.000888152	2.15887	1.386	148	59	1.27727	0.512654	2.16427	0.81681
445077	NM_001003471	fkbp14	FK506 binding protein 14	protein_coding	NP_001003471.1	ZDB-GENE-040801-210	-2.95204	0.417306	2.92013e-05	0.000142669	0.727412	1.55665	28	71	0.292538	0.775598	0.49569	1.23576
445079	NM_001003473,XM_005159916,XM_009292085	gpalpp1	GPALPP motifs containing 1	protein_coding	NP_001003473.1;XP_005159973.1;XP_009290360.1	ZDB-GENE-040801-212	2.35764	3.83338	5.24469e-08	4.38266e-07	4.38733	3.2404	851	309	7.90289	2.94998	13.391	4.70019
445086	NM_001003480,XM_009304971	zgc:92380	zgc:92380	protein_coding	NP_001003480.1;XP_009303246.1	ZDB-GENE-040801-221	-3.79567	8.31163	1.22238e-19	4.20791e-18	7.0606	8.977	5658	18389	51.056	170.582	86.5117	271.787
445091	NM_001003485,NM_001003485_dup1	zgc:92480	zgc:92480	protein_coding	NP_001003485.1	ZDB-GENE-040801-227	-2.41213	5.77948	2.15761e-09	2.25452e-08	5.052	6.29671	1374	2838	8.21915	17.4323	0.182236	0.290571
445094	NM_001003488,XM_005163113	pkmb	pyruvate kinase, muscle, b	protein_coding	NP_001003488.1;XP_005163170.3	ZDB-GENE-040801-230	2.13047	3.51755	2.40905e-06	1.46471e-05	4.04455	3.04868	662	266	4.30639	1.89422	7.29694	3.01805
445095	NM_001003489	tm4sf4	transmembrane 4 L six family member 4	protein_coding	NP_001003489.1	ZDB-GENE-040801-231	4.48541	0.58395	2.16695e-08	1.92229e-07	1.74057	0.603703	100	19	1.35944	0.252284	2.3035	0.401963
445105	NM_001003499,XM_021468811	lipia	lipase, member Ia	protein_coding	NP_001003499.1;XP_021324486.1	ZDB-GENE-040801-242	-3.72773	3.36863	3.07127e-15	6.7855e-14	2.42102	4.10808	186	594	1.57642	5.09326	2.67116	8.11507
445107	NM_001003501	capn9	calpain 9	protein_coding	NP_001003501.1	ZDB-GENE-010724-2	-2.72233	6.68617	7.40353e-12	1.07838e-10	5.81532	7.24392	2362	5506	13.9446	33.3831	23.6284	53.1891
445109	NM_001003503,NM_001003503_dup1,XM_021476083	elac1	elaC ribonuclease Z 1	protein_coding	NP_001003503.1	ZDB-GENE-040801-246	2.61695	2.96067	1.43453e-08	1.31366e-07	3.60523	2.39679	477	156	5.651	1.89998	8.05713	2.19932
445111	NM_001003505	stac3	SH3 and cysteine rich domain 3	protein_coding	NP_001003505.1	ZDB-GENE-040801-248	3.21504	1.31696	8.84434e-08	7.15198e-07	2.23261	1.10341	158	42	1.44813	0.389676	2.45378	0.620869
445118	NM_001003512,NM_001316336,XM_009306434,XM_017358447	g6pca.1	glucose-6-phosphatase a, catalytic subunit, tandem duplicate 1	protein_coding	NP_001003512.2;NP_001303265.1;XP_009304709.1;XP_017213936.1	ZDB-GENE-031001-4	7.88982	-0.545809	5.63142e-07	3.91945e-06	1.07079	0.184902	47	5	0.291101	0.026421	0.493255	0.042097
445125	NM_001003519,XM_005168776	pltp	phospholipid transfer protein	protein_coding	NP_001003519.1;XP_005168833.1	ZDB-GENE-040801-22	3.45766	3.62373	3.63135e-14	7.05246e-13	4.32296	2.69976	812	201	6.83855	1.74354	11.5876	2.77797
445133	NM_001003527	kctd15b	potassium channel tetramerization domain containing 15b	protein_coding	NP_001003527.1	ZDB-GENE-040801-34	-2.44285	-0.23603	0.00366341	0.0105927	0.554179	1.10341	20	42	0.281078	0.620878	0.476272	0.989241
445140	NM_001003534,NM_001003534_dup1	mipa	major intrinsic protein of lens fiber a	protein_coding	NP_001003534.1	ZDB-GENE-040801-41	-30.5823	8.88345	1.18317e-92	1.08198e-89	4.94968	9.83857	1277	33443	6.95111	187.042	11.7783	298.013
445142	NM_001003536,XM_009305649,XM_009305650	brf2	BRF2, RNA polymerase III transcription initiation factor	protein_coding	NP_001003536.1;XP_009303924.1;XP_009303925.1	ZDB-GENE-040801-43	3.26861	1.26639	7.86786e-08	6.40917e-07	2.19621	1.06621	153	40	1.4859	0.38916	2.51778	0.620048
445153	NM_001003547,NM_001003547_dup1,XM_005158778	itsn2b	intersectin 2b	protein_coding	NP_001003547.2	ZDB-GENE-050309-102	-2.10845	5.45954	4.11164e-07	2.9405e-06	4.8722	5.92234	1208	2181	2.82187	5.24495	4.26673	3.22398
445158	NM_001003552	slc16a9b	solute carrier family 16, member 9b	protein_coding	NP_001003552.1	ZDB-GENE-040801-69	2.05511	4.11077	3.05566e-06	1.82792e-05	4.59449	3.61675	989	412	5.99531	2.56271	10.1587	4.08316
445161	NM_001003555	cenpp	centromere protein P	protein_coding	NP_001003555.1	ZDB-GENE-040801-74	-5.10187	0.151747	4.16326e-08	3.53659e-07	0.434294	1.48798	15	66	0.206918	0.940588	0.350612	1.49863
445165	NM_001003559,XM_005159613	fuca1.2	fucosidase, alpha-L- 1, tissue, tandem duplicate 2	protein_coding	NP_001003559.1;XP_005159670.1	ZDB-GENE-040801-78	-2.89206	2.84601	5.58547e-10	6.35022e-09	2.2254	3.54082	157	389	1.50342	3.63776	2.54747	5.79603
445169	NM_001003563,NM_001003563_dup1	zgc:101100	zgc:101100	protein_coding	NP_001003563.1	ZDB-GENE-040801-82	2.61065	-0.229035	0.00277865	0.00830042	1.1026	0.52363	49	16	0.49848	0.162912	0.580429	0.211222
445181	NM_001003575,NM_001003575_dup1,XM_021472211	pibf1	progesterone immunomodulatory binding factor 1	protein_coding	NP_001003575.1	ZDB-GENE-040801-94	3.03791	1.04041	1.78391e-06	1.11371e-05	1.99904	0.988796	128	36	0.792238	1.4984	1.34241	2.37078
445187	NM_001003581	trim101	tripartite motif containing 101	protein_coding	NP_001003581.1	ZDB-GENE-040801-100	2.6667	0.783224	4.3055e-05	0.000201508	1.77058	0.927884	103	33	0.89166	0.287328	1.51087	0.457799
445196	NM_001003590	arf4a	ADP-ribosylation factor 4a	protein_coding	NP_001003590.1	ZDB-GENE-040801-109	-3.70334	2.74353	1.34259e-13	2.42184e-12	1.93863	3.52377	121	384	1.474	4.80994	2.49761	7.66366
445197	NM_001003591,XM_005161093	fam219aa	family with sequence similarity 219, member Aa	protein_coding	NP_001003591.1;XP_005161150.1	ZDB-GENE-040801-110	-2.10974	1.93605	6.84482e-05	0.000306639	1.78045	2.61857	104	188	0.697404	1.17707	1.18171	1.87541
445203	NM_001003597,XM_005170917	mnd1	meiotic nuclear divisions 1 homolog (S. cerevisiae)	protein_coding	NP_001003597.1;XP_005170974.1	ZDB-GENE-040801-116	-3.78813	2.32872	6.81251e-13	1.12119e-11	1.62484	3.15438	89	289	0.977788	3.27875	1.65681	5.22402
445213	NM_001003607	cnrip1a	cannabinoid receptor interacting protein 1a	protein_coding	NP_001003607.1	ZDB-GENE-040801-126	2.03082	5.01198	2.04837e-06	1.26529e-05	5.46457	4.47569	1843	777	20.6349	8.92872	34.9648	14.2261
445214	NM_001003608	nr2e1	nuclear receptor subfamily 2, group E, member 1	protein_coding	NP_001003608.1	ZDB-GENE-040801-127	2.34659	3.03789	3.1224e-07	2.28828e-06	3.63544	2.55286	488	178	2.79514	1.0476	4.73621	1.66914
445219	NM_001003613,NM_001003613_dup1,XM_005165655,XM_005165658,XM_017356064,XM_017356065,XM_017356066,XM_021476086,XM_021476087	srek1	splicing regulatory glutamine/lysine-rich protein 1	protein_coding	NP_001003613.2	ZDB-GENE-040801-132	2.14662	5.84351	1.87732e-07	1.43689e-06	6.30849	5.22708	3342	1333	25.2593	10.5423	27.2487	14.1662
445222	NM_001003616,NM_001003616_dup1,XM_005167827	rcan1a	regulator of calcineurin 1a	protein_coding	NP_001003616.1	ZDB-GENE-040801-135	-2.06466	6.20227	6.3703e-07	4.37871e-06	5.61552	6.64622	2051	3626	12.5599	23.3444	15.6503	26.4302
445225	NM_001003619,NM_001003619_dup1,XM_009298030,XM_021470480,XM_021470481	uevld	UEV and lactate/malate dehyrogenase domains	protein_coding	NP_001003619.1	ZDB-GENE-040801-138	-2.24424	3.29281	6.54445e-07	4.48224e-06	2.81108	3.85897	257	494	1.99429	3.74968	2.9171	5.04174
445232	NM_001003626,XM_005170449,XM_005170450	gna15.1	guanine nucleotide binding protein (G protein), alpha 15 (Gq class), tandem duplicate 1	protein_coding	NP_001003626.1;XP_005170506.1;XP_005170507.1	ZDB-GENE-040801-146	-2.36872	3.45973	8.27531e-08	6.71248e-07	2.90878	4.03776	278	564	1.47237	3.20976	2.49485	5.1141
445241	NM_001003635,NM_001003635_dup1	zgc:100920	zgc:100920	protein_coding	NP_001003635.1	ZDB-GENE-040801-156	2.46021	1.00398	7.89695e-05	0.000349526	1.91195	1.08493	118	41	1.21747	0.425836	1.79407	0.678482
445244	NM_001114441,NM_001114441_dup1,NM_001114441_dup2,XM_021476834	ap1m3	adaptor-related protein complex 1, mu 3 subunit	protein_coding	NP_001107913.1	ZDB-GENE-040801-159	-2.72342	2.62839	9.00746e-09	8.5378e-08	2.10492	3.32157	141	329	0.808912	1.94548	0.240855	1.87812
445250	NM_001003644,NM_001003644_dup1	neu3.2	sialidase 3 (membrane sialidase), tandem duplicate 2	protein_coding	NP_001003644.2	ZDB-GENE-040801-262	-2.73933	3.15052	1.33851e-09	1.44856e-08	2.51858	3.80353	202	474	2.13924	5.16694	3.62483	8.23247
445255	NM_001003649,XM_021478640	ralba	v-ral simian leukemia viral oncogene homolog Ba (ras related)	protein_coding	NP_001003649.1;XP_021334315.1	ZDB-GENE-040801-267	-2.18525	2.62178	5.94665e-06	3.36045e-05	2.27511	3.23202	164	307	1.03363	2.13342	1.75143	3.39918
445280	NM_001003735	cd81b	CD81 molecule b	protein_coding	NP_001003735.1	ZDB-GENE-040808-52	-2.32585	-0.425392	0.00764597	0.0201363	0.507414	0.988796	18	36	0.208216	0.427894	0.352812	0.681762
445282	NM_001003737	zgc:92041	zgc:92041	protein_coding	NP_001003737.1	ZDB-GENE-040808-55	4.13916	2.89847	1.01998e-15	2.38106e-14	3.68881	1.95291	508	105	8.60683	1.81851	14.5838	2.89743
445289	NM_001003744,XM_009298118	kras	v-Ki-ras2 Kirsten rat sarcoma viral oncogene homolog	protein_coding	NP_001003744.1;XP_009296393.2	ZDB-GENE-040808-67	-2.1432	5.80959	1.95834e-07	1.49563e-06	5.19627	6.27496	1523	2795	3.39894	6.90613	5.75933	11.0035
445293	NM_001003749,XM_009294620	aqp4	aquaporin 4	protein_coding	NP_001003749.1;XP_009292895.1	ZDB-GENE-040724-152	2.71012	1.1026	9.51896e-06	5.12314e-05	2.01584	1.08493	130	41	0.460152	0.187798	0.779704	0.299218
445308	NM_001003765	cthrc1a	collagen triple helix repeat containing 1a	protein_coding	NP_001003765.1	ZDB-GENE-040808-22	6.26358	1.98445	3.66466e-18	1.08868e-16	2.94433	1.04724	286	39	3.4997	0.486064	5.93006	0.774444
445309	NM_001003766	fam199x	family with sequence similarity 199, X-linked	protein_coding	NP_001003766.1	ZDB-GENE-040808-24	-2.06579	2.0343	9.73159e-05	0.000420902	1.86635	2.69368	113	200	1.12933	2.04998	1.91359	3.26623
445316	NM_001003773	cdkl1	cyclin-dependent kinase-like 1 (CDC2-related kinase)	protein_coding	NP_001003773.1	ZDB-GENE-040808-34	3.32368	0.78682	1.03543e-06	6.76762e-06	1.8288	0.820276	109	28	1.12082	0.295971	1.89917	0.471569
445318	NM_001003775,NM_001003775_dup1	nrros	negative regulator of reactive oxygen species	protein_coding	NP_001003775.1	ZDB-GENE-040808-36	4.73066	0.715742	2.00558e-09	2.10706e-08	1.8477	0.629436	111	20	0.725419	0.133003	0.827303	0.166233
445326	NM_001003783,NM_001003783_dup1	akr1a1a	aldo-keto reductase family 1, member A1a (aldehyde reductase)	protein_coding	NP_001003783.1	ZDB-GENE-040808-44	-3.46221	-1.11153	0.00282728	0.00843013	0.247725	0.728009	8	24	0.109721	0.350503	0.185916	0.558456
445358	XM_017357438,XM_021478397	obscna	obscurin, cytoskeletal calmodulin and titin-interacting RhoGEF a, transcript variant X2	protein_coding	XP_017212927.2;XP_021334072.1	ZDB-GENE-040812-4	4.95667	3.82506	6.09864e-22	2.60717e-20	4.61256	2.51884	1002	173	0.673229	0.118992	1.14075	0.18959
445390	NM_001003867	mybl2b	v-myb avian myeloblastosis viral oncogene homolog-like 2b	protein_coding	NP_001003867.2	ZDB-GENE-041007-1	-2.21069	1.5345	8.80888e-05	0.000384552	1.47491	2.30396	76	144	0.311953	0.611693	0.528587	0.974608
445401	NM_001003878	cenpl	centromere protein L	protein_coding	NP_001003878.2	ZDB-GENE-040930-6	-2.41099	-0.826475	0.0211185	0.0480772	0.383405	0.797757	13	27	0.103096	0.226361	0.174691	0.36066
445471	NM_001003983	cdh5	cadherin 5	protein_coding	NP_001003983.1	ZDB-GENE-040816-1	2.35563	1.51842	3.36782e-05	0.000161655	2.30276	1.41588	168	61	0.83216	0.307683	1.41005	0.490229
445474	NM_001003984	stat5b	signal transducer and activator of transcription 5b	protein_coding	NP_001003984.1	ZDB-GENE-040818-1	-2.46129	2.49319	3.52146e-07	2.54773e-06	2.08117	3.16322	138	291	0.615037	1.33509	1.04215	2.12719
445475	NM_001004112	fhl5	four and a half LIM domains 5	protein_coding	NP_001004112.1	ZDB-GENE-040822-3	2.12263	0.470732	0.00322592	0.00947108	1.48701	0.885799	77	31	1.02666	0.416878	1.73961	0.66421
445477	NM_001003986	abrab	actin binding Rho activating protein b	protein_coding	NP_001003986.1	ZDB-GENE-040822-7	6.63343	-1.38431	0.000672116	0.00236161	0.643394	0.113759	24	3	0.175284	0.022899	0.297009	0.036485
445499	NM_001004003	tnpo2	transportin 2 (importin 3, karyopherin beta 2b)	protein_coding	NP_001004003.1	ZDB-GENE-040822-16	-2.19818	4.13442	3.24741e-07	2.36833e-06	3.58002	4.64925	468	881	2.2132	4.27577	3.75016	6.81256
445503	NM_001004007,NM_001328273,XM_017352468	matn3a	matrilin 3a	protein_coding	NP_001004007.1;NP_001315202.1;XP_017207957.1	ZDB-GENE-040822-21	4.64272	1.34816	1.80953e-11	2.52219e-10	2.34326	0.906995	174	32	1.29429	0.2389	2.19311	0.380639
445505	NM_001004008,XM_005165300	fbp2	fructose-1,6-bisphosphatase 2	protein_coding	NP_001004008.1;XP_005165357.1	ZDB-GENE-040822-23	2.72536	0.964936	1.75705e-05	8.98954e-05	1.91195	1.00854	118	37	1.05784	0.341513	1.79245	0.544131
445563	NM_001004013,NM_001004013_dup1	spata4	spermatogenesis associated 4	protein_coding	NP_001004013.1	ZDB-GENE-050417-153	4.50714	-2.23691	0.0443061	0.0896298	0.330654	0.0768272	11	2	0.179923	0.030713	0.30487	0.045948
447806	NM_001004545,NM_001004545_dup1	mpdu1a	mannose-P-dolichol utilization defect 1a	protein_coding	NP_001004545.1	ZDB-GENE-040912-9	-2.17116	1.57204	9.60172e-05	0.000415883	1.51092	2.32773	79	147	0.452796	0.866531	0.767239	1.38064
447807	NM_001004546	slc51a	solute carrier family 51, alpha subunit	protein_coding	NP_001004546.1	ZDB-GENE-040912-10	-4.02066	4.91309	1.97568e-19	6.6808e-18	3.69925	5.62101	512	1763	5.11771	18.127	8.67169	28.8816
447810	NM_001004549,XM_021479161,XM_021479162	nt5c2l1	5'-nucleotidase, cytosolic II, like 1	protein_coding	NP_001004549.1;XP_021334836.1;XP_021334837.1	ZDB-GENE-031006-8	2.7112	5.34224	2.68039e-11	3.65134e-10	5.91107	4.51246	2527	798	17.3827	5.63121	29.4541	8.97218
447817	NM_001004556	zgc:92161	zgc:92161	protein_coding	NP_001004556.2	ZDB-GENE-040912-22	-3.60509	4.30107	3.04837e-16	7.48149e-15	3.25506	4.99192	365	1127	3.01202	9.55785	5.10372	15.2285
447821	NM_001004560	sav1	salvador family WW domain containing protein 1	protein_coding	NP_001004560.1	ZDB-GENE-040912-28	-2.45436	4.45133	4.09115e-09	4.11486e-08	3.7703	5.0018	540	1135	3.66304	7.90569	6.20684	12.5961
447823	NM_001004562	fth1b	ferritin, heavy polypeptide 1b	protein_coding	NP_001004562.1	ZDB-GENE-040912-30	2.06296	5.44427	9.07081e-07	6.0223e-06	5.89639	4.87712	2501	1038	27.1761	11.5858	46.0484	18.4595
447825	NM_001328216	mfsd6b	major facilitator superfamily domain containing 6b	protein_coding	NP_001315145.1	ZDB-GENE-040912-84	-2.32639	3.38892	1.73431e-07	1.33569e-06	2.86308	3.96383	268	534	1.32151	2.70381	2.23923	4.30796
447832	NM_001004571,XM_017351625,XM_017351626,XM_017351627,XM_021467150,XM_021467151	capn3a	calpain 3a, (p94)	protein_coding	NP_001004571.1;XP_017207114.1;XP_017207115.1;XP_017207116.1;XP_021322825.1;XP_021322826.1	ZDB-GENE-040912-97	-2.31782	2.45333	2.12346e-06	1.30654e-05	2.09705	3.1048	140	278	0.62799	1.30184	1.0641	2.07422
447836	NM_001004575	pfkma	phosphofructokinase, muscle a	protein_coding	NP_001004575.1	ZDB-GENE-040912-135	2.93591	2.47525	2.15773e-09	2.25452e-08	3.20098	1.92201	350	102	2.08182	0.622713	3.52753	0.992166
447839	NM_001004578,NM_001004578_dup1,NM_001004578_dup2	ehd1b	EH-domain containing 1b	protein_coding	NP_001004578.1	ZDB-GENE-030131-2069	-2.13243	4.02554	1.0171e-06	6.65192e-06	3.50761	4.53135	443	809	2.6245	4.92817	3.26882	6.07254
447843	NM_001004582	ctrl	chymotrypsin-like	protein_coding	NP_001004582.1	ZDB-GENE-040912-147	6.69638	1.19697	1.55707e-14	3.1796e-13	2.28207	0.654718	165	21	3.0015	0.39196	5.08589	0.624508
447845	NM_001004584,NM_001004584_dup1	cavin2b	caveolae associated protein 2b	protein_coding	NP_001004584.2	ZDB-GENE-040912-149	-3.62285	6.56692	3.6107e-18	1.07417e-16	5.39241	7.22453	1751	5432	7.96704	25.381	13.4997	40.4394
447848	NM_001004587	cyp8b3	cytochrome P450, family 8, subfamily B, polypeptide 3	protein_coding	NP_001004587.2	ZDB-GENE-040912-153	-6.99118	2.23621	4.7115e-22	2.0517e-20	1.11825	3.20232	50	300	0.393095	2.43867	0.666078	3.88552
447851	NM_001004590,NM_001004590_dup1	cyb561d1	cytochrome b561 family, member D1	protein_coding	NP_001004590.1	ZDB-GENE-040912-157	-2.32726	-0.215562	0.00575891	0.0157412	0.577005	1.10341	21	42	0.230308	0.471781	0.362184	0.543217
447856	NM_001004595	utp3	UTP3, small subunit (SSU) processome component, homolog (S. cerevisiae)	protein_coding	NP_001004595.1	ZDB-GENE-040912-163	-2.05681	4.41508	2.04095e-06	1.26108e-05	3.90042	4.89048	595	1048	4.78777	8.66049	8.11263	13.7987
447863	NM_001004602,NM_001327970,XM_009302129,XM_009302130,XM_009302131,XM_009302132,XM_009302133,XM_009302134,XM_009302135,XM_021476838,XM_021476840,XM_021476841	bin1b	bridging integrator 1b	protein_coding	NP_001004602.2;NP_001314899.1;XP_009300404.1;XP_009300405.1;XP_009300406.1;XP_009300407.1;XP_009300408.1;XP_009300409.1;XP_009300410.1;XP_021332513.1;XP_021332515.1;XP_021332516.1	ZDB-GENE-030425-1	3.00735	4.55281	9.30036e-13	1.50704e-11	5.17492	3.66421	1500	427	9.60183	2.76443	16.2698	4.40454
447864	NM_001004603	ass1	argininosuccinate synthase 1	protein_coding	NP_001004603.1	ZDB-GENE-040912-178	-3.24771	7.49041	8.96659e-16	2.1025e-14	6.4204	8.10816	3615	10053	18.628	53.2126	31.5641	84.7834
447865	NM_001004604	zgc:92481	zgc:92481	protein_coding	NP_001004604.1	ZDB-GENE-040912-181	-2.94331	5.6044	3.73239e-13	6.3514e-12	4.68132	6.20127	1053	2654	5.9127	15.3036	10.0188	24.3831
447866	NM_001004605	arrdc3b	arrestin domain containing 3b	protein_coding	NP_001004605.1	ZDB-GENE-040912-182	2.03578	6.92267	8.87401e-07	5.91404e-06	7.35428	6.33777	6945	2921	38.2653	16.5271	64.8386	26.3326
447869	NM_001004608,NM_001004608_dup1	tmod2	tropomodulin 2	protein_coding	NP_001004608.1	ZDB-GENE-040912-185	-6.92696	1.8694	1.08329e-19	3.75989e-18	0.936025	2.87671	39	232	0.404186	2.50376	0.684871	3.98923
447876	NM_001004615	pqlc3	PQ loop repeat containing 3	protein_coding	NP_001004615.1	ZDB-GENE-040912-40	-2.80707	1.28988	1.45963e-06	9.27786e-06	1.17919	2.18753	54	130	0.598967	1.47913	1.01492	2.3567
447887	NM_001004626	ppifa	peptidylprolyl isomerase Fa	protein_coding	NP_001004626.1	ZDB-GENE-040912-52	-2.08846	5.40047	5.89596e-07	4.0833e-06	4.82412	5.85985	1167	2087	17.959	32.9857	30.4306	52.556
447891	NM_001004630	sc5d	sterol-C5-desaturase	protein_coding	NP_001004630.1	ZDB-GENE-040912-56	-2.36131	2.36581	1.39878e-06	8.92345e-06	2.01584	3.03431	130	263	1.63897	3.41162	2.77714	5.43572
447893	NM_001004632,NM_001004632_dup1	anxa3a	annexin A3a	protein_coding	NP_001004632.1	ZDB-GENE-040912-58	-4.07334	5.65544	1.93147e-20	7.29348e-19	4.38248	6.35571	848	2958	10.0728	35.5859	3.76746	56.6989
447903	NM_001004641	dhrs13a.2	dehydrogenase/reductase (SDR family) member 13a, tandem duplicate 2	protein_coding	NP_001004641.1	ZDB-GENE-040912-69	-2.63208	4.16504	4.39813e-10	5.05956e-09	3.44074	4.75239	421	949	6.27435	14.5448	10.6316	23.1741
447904	NM_001004642	ildr1b	immunoglobulin-like domain containing receptor 1b	protein_coding	NP_001004642.2	ZDB-GENE-040912-72	-4.90461	2.97165	2.2671e-19	7.59298e-18	1.86635	3.80636	113	475	0.64661	2.79189	1.09565	4.4483
447905	NM_001004643	entpd2a.1	ectonucleoside triphosphate diphosphohydrolase 2a, tandem duplicate 1	protein_coding	NP_001004643.1	ZDB-GENE-040724-187	-4.44801	6.12545	3.0628e-23	1.48776e-21	4.73432	6.84498	1094	4167	4.24865	16.6275	7.19912	26.4925
447908	NM_001004646,XM_005170028	osbpl3a	oxysterol binding protein-like 3a	protein_coding	NP_001004646.1;XP_005170085.1	ZDB-GENE-040912-77	-10.1256	4.56931	5.8127e-43	8.73276e-41	2.39556	5.4654	182	1579	0.922138	8.38073	1.56251	13.353
447924	NM_001004662	zgc:103678	zgc:103678	protein_coding	NP_001004662.1	ZDB-GENE-040912-107	2.82973	0.801693	1.449e-05	7.52888e-05	1.79998	0.906995	106	32	1.82252	0.556408	3.08816	0.886522
447930	NM_001004668	mylpfb	myosin light chain, phosphorylatable, fast skeletal muscle b	protein_coding	NP_001004668.1	ZDB-GENE-040912-115	2.25198	5.88233	3.1479e-08	2.73256e-07	6.36819	5.21863	3485	1325	72.5339	28.3202	122.905	45.1224
447933	NM_001004671	uxt	ubiquitously-expressed, prefoldin-like chaperone	protein_coding	NP_001004671.1	ZDB-GENE-040912-118	2.05787	2.52384	3.73978e-05	0.00017764	3.11391	2.23858	327	136	5.87269	2.50322	9.95097	3.98837
447940	NM_001004678	adam9	ADAM metallopeptidase domain 9	protein_coding	NP_001004678.1	ZDB-GENE-040912-127	-2.95614	2.29267	3.03525e-09	3.10811e-08	1.79025	3.04868	105	266	1.37681	3.57943	2.33294	5.70309
447942	NM_001004680,NM_001004680_dup1	cox6a2	cytochrome c oxidase subunit VIa polypeptide 2	protein_coding	NP_001004680.1	ZDB-GENE-040912-129	5.62988	1.23026	4.27633e-13	7.24187e-12	2.28207	0.751635	165	25	4.99379	0.753227	5.86624	0.493009
447944	NM_001004682	fabp11a	fatty acid binding protein 11a	protein_coding	NP_001004682.1	ZDB-GENE-040912-132	-16.4657	9.89072	2.4721e-68	1.18172e-65	6.77742	10.8064	4642	65448	107.137	1551.45	181.539	2471.91
448925	NM_001204123	gpatch1	G patch domain containing 1	protein_coding	NP_001191052.1	ZDB-GENE-040914-65	2.35196	5.73186	6.36489e-09	6.18635e-08	6.23818	5.02985	3181	1158	15.6581	5.85321	26.5318	9.32589
449538	NM_001005580,XM_009305399	opcml	opioid binding protein/cell adhesion molecule-like	protein_coding	NP_001005580.1;XP_009303674.1	ZDB-GENE-040927-3	4.61979	0.617711	9.14061e-09	8.64842e-08	1.77058	0.603703	103	19	0.779067	0.142631	1.32009	0.227254
449552	NM_001005594,NM_001005594_dup1,NM_001005594_dup2	fkbp1ab	FK506 binding protein 1Ab	protein_coding	NP_001005594.1	ZDB-GENE-040927-9	2.29785	0.4553	0.00130776	0.00427335	1.49902	0.84245	78	29	2.5367	0.950152	1.55379	1.51387
449616	NM_001005604,XM_005170982,XM_005170983,XM_005170984	bcl9	B-cell CLL/lymphoma 9	protein_coding	NP_001005604.1;XP_005171039.1;XP_005171040.1;XP_005171041.1	ZDB-GENE-090313-135	-2.21613	5.72844	5.97694e-08	4.95128e-07	5.08522	6.20983	1407	2670	3.33675	5.91046	5.65395	9.4171
449651	NM_001005923	stmn2a	stathmin 2a	protein_coding	NP_001005923.2	ZDB-GENE-041010-85	2.3513	5.766	6.3109e-09	6.13671e-08	6.2718	5.06328	3257	1186	23.5933	8.82245	39.9777	14.0568
449652	NM_001005924,XM_005168477	tmem56b	transmembrane protein 56b	protein_coding	NP_001005924.1;XP_005168534.1	ZDB-GENE-041010-90	9.09167	5.68448	5.93542e-43	8.85388e-41	6.54719	3.482	3951	372	14.1453	1.36664	23.9684	2.17746
449670	NM_001077531,XM_009299804	srl	sarcalumenin	protein_coding	NP_001070999.1;XP_009298079.1	ZDB-GENE-061110-91	2.11449	2.55015	1.87788e-05	9.54046e-05	3.14861	2.23858	336	136	2.69452	1.11857	4.56572	1.78221
449679	NM_205738	cav3	caveolin 3	protein_coding	NP_991301.1	ZDB-GENE-050522-426	2.69479	1.25801	6.52184e-06	3.64824e-05	2.136	1.17505	145	46	2.15125	0.699067	3.64518	1.11382
449707	XM_005160604,XM_021468631,XM_021468632,XM_021468633,XM_021468634	mylk4b	myosin light chain kinase family, member 4b, transcript variant X3	protein_coding	XP_005160661.1;XP_021324306.1;XP_021324307.1;XP_021324308.1;XP_021324309.1	ZDB-GENE-041001-128	-6.19002	-0.481505	7.85153e-07	5.28452e-06	0.247725	1.12165	8	43	0.040241	0.22838	0.068187	0.363875
449761	XM_021478432,XM_690959	si:ch211-163l21.8	si:ch211-163l21.8	protein_coding	XP_696051.3	ZDB-GENE-041008-93	9.59737	2.05289	1.70328e-24	9.06965e-23	3.0663	0.820276	315	28	1.15987	0.105125	1.96534	0.167496
449769	NM_001005942	glrx	glutaredoxin (thioltransferase)	protein_coding	NP_001005942.1	ZDB-GENE-041010-11	-2.50256	4.81391	1.27184e-09	1.38032e-08	4.09089	5.36271	685	1468	11.452	25.1999	19.4049	40.1509
449771	NM_001005944,XM_017355001,XM_017355002,XM_017355003,XM_017355004	slc38a4	solute carrier family 38, member 4	protein_coding	NP_001005944.2;XP_017210490.1;XP_017210491.1;XP_017210492.1;XP_017210493.1	ZDB-GENE-041010-14	-2.46014	6.03975	8.36429e-10	9.31812e-09	5.2856	6.56229	1623	3419	5.06745	10.9815	8.58653	17.4968
449775	NM_001005948	prrg1	proline rich Gla (G-carboxyglutamic acid) 1	protein_coding	NP_001005948.1	ZDB-GENE-041010-20	-2.2053	0.821654	0.000719254	0.00251209	1.05462	1.75671	46	87	0.521452	1.02134	0.883573	1.6273
449784	NM_001005957,NM_001005957_dup1	mgst1.1	microsomal glutathione S-transferase 1.1	protein_coding	NP_001005957.1	ZDB-GENE-041010-30	-5.38501	1.03876	2.77766e-12	4.252e-11	0.706862	2.14356	27	125	0.393231	1.90558	0.666309	3.03615
449788	NM_001005961	s100a10a	S100 calcium binding protein A10a	protein_coding	NP_001005961.1	ZDB-GENE-041010-35	4.40276	1.28678	1.06107e-10	1.33239e-09	2.28207	0.906995	165	32	2.79709	0.553885	4.73951	0.882502
449791	NM_001005964,NM_001005964_dup1	ap3s1	adaptor-related protein complex 3, sigma 1 subunit	protein_coding	NP_001005964.1	ZDB-GENE-041010-38	2.02374	3.85747	6.35089e-06	3.57066e-05	4.34474	3.39841	825	349	23.087	10.0125	39.1197	15.9529
449792	NM_001005965	cryba1l2	crystallin, beta A1, like 2	protein_coding	NP_001005965.2	ZDB-GENE-041010-40	-23.2362	8.20953	2.14135e-81	1.5013e-78	4.66809	9.15122	1043	20754	9.43935	193.043	15.9945	307.575
449795	NM_001005968	zgc:101840	zgc:101840	protein_coding	NP_001005968.1	ZDB-GENE-041010-43	2.53576	3.68722	5.88907e-09	5.7558e-08	4.27665	3.04391	785	265	10.3262	3.57337	17.4973	5.69343
449803	NM_001005976,NM_001005976_dup1	c1qc	complement component 1, q subcomponent, C chain	protein_coding	NP_001005976.1	ZDB-GENE-041010-51	2.54884	1.37312	1.07953e-05	5.74394e-05	2.21088	1.27626	155	52	2.6273	0.909628	4.45182	1.44931
449814	NM_001005987,XM_021479600	dennd6aa	DENN/MADD domain containing 6Aa	protein_coding	NP_001005987.1;XP_021335275.1	ZDB-GENE-041010-63	-2.20774	1.10017	0.000271837	0.00105646	1.20872	1.96306	56	106	0.426732	0.851568	0.723075	1.3568
449816	NM_001005989,XM_005171196	elovl1a	ELOVL fatty acid elongase 1a	protein_coding	NP_001005989.1;XP_005171253.1	ZDB-GENE-041010-66	-2.40399	3.96535	2.03741e-08	1.81657e-07	3.34425	4.52451	391	805	3.60323	7.63938	6.10549	12.1718
449819	NM_001005992,XR_002458999	tmbim1a	transmembrane BAX inhibitor motif containing 1a	protein_coding	NP_001005992.2	ZDB-GENE-041010-69	-4.91643	5.0263	1.63229e-24	8.7137e-23	3.58566	5.78455	470	1979	2.01812	8.65407	3.4196	13.7885
449826	NM_001005999,NM_001005999_dup1,XM_005165141	ctsll	cathepsin L, like	protein_coding	NP_001005999.1	ZDB-GENE-041010-76	3.37926	-1.24496	0.0131976	0.0321576	0.643394	0.2192	24	6	0.208659	0.056128	0.14526	0.036742
449836	NM_001006006	fra10ac1	FRA10A associated CGG repeat 1	protein_coding	NP_001006006.2	ZDB-GENE-041010-95	2.22035	2.30848	1.0903e-05	5.79685e-05	2.95308	2.01279	288	111	3.13929	1.23788	5.31937	1.97231
449837	NM_001005777,NM_001005777_dup1	apoob	apolipoprotein O, b	protein_coding	NP_001005777.1	ZDB-GENE-041001-40	2.13173	4.10394	9.59799e-07	6.32836e-06	4.60425	3.57763	996	400	10.8727	4.48474	18.4232	7.14551
449857	XM_009304798,XM_017357830	si:dkey-145p14.5	si:dkey-145p14.5, transcript variant X2	protein_coding	XP_009303073.1;XP_017213319.1	ZDB-GENE-041008-117	-2.14118	4.91101	3.68867e-07	2.66062e-06	4.33138	5.39119	817	1498	2.1805	4.10613	3.69473	6.54228
449864	XM_009294079	grin2da	glutamate receptor, ionotropic, N-methyl D-aspartate 2D, a	protein_coding	XP_009292354.1	ZDB-GENE-041008-124	2.45496	-1.04357	0.0370978	0.0771739	0.686014	0.317457	26	9	0.053084	0.017642	0.089949	0.028109
449866	NM_001258317	si:ch211-39i2.2	si:ch211-39i2.2	protein_coding	NP_001245246.1	ZDB-GENE-041008-126	-2.12962	3.20155	3.42479e-06	2.03026e-05	2.77698	3.75175	250	456	3.86666	7.23812	6.55185	11.5325
449925	NM_001025299	slc27a2a	solute carrier family 27 (fatty acid transporter), member 2a	protein_coding	NP_001020470.1	ZDB-GENE-050706-104	2.00943	1.89759	0.000259349	0.0010126	2.55927	1.77988	209	89	1.32593	0.581767	2.24673	0.926926
449936	NM_001137666,XM_005164103	ppl	periplakin	protein_coding	NP_001131138.1;XP_005164160.1	ZDB-GENE-041008-196	-3.90508	8.63108	2.14688e-20	8.09234e-19	7.34558	9.30434	6903	23082	18.08	62.0913	30.6356	98.9298
449937	NM_001020815	gatsl3	GATS protein-like 3	protein_coding	NP_001018651.1	ZDB-GENE-050327-38	-3.18948	1.96752	1.67877e-09	1.78782e-08	1.51092	2.78809	79	216	0.533235	1.50773	0.903539	2.40226
449947	NM_001145814	slc16a12b	solute carrier family 16, member 12b	protein_coding	NP_001139286.1	ZDB-GENE-050522-80	-9.58347	5.26941	9.32895e-44	1.48648e-41	3.05008	6.14607	311	2553	2.07323	17.4902	3.51298	27.8671
449979	XM_003200345,XM_005158528,XM_021473144,XM_021473145,XM_021474376,XM_021474377	kif20ba	kinesin family member 20Ba, transcript variant X2	protein_coding	XP_021328819.1;XP_021328820.1	ZDB-GENE-041111-213	-2.91623	1.77819	6.14504e-08	5.08053e-07	1.4504	2.59917	74	185	0.182688	0.471165	0.309553	0.750707
449995	NM_001006016,XM_005157232	atl3	atlastin 3	protein_coding	NP_001006016.1;XP_005157289.1	ZDB-GENE-041010-109	-2.18169	5.87095	9.99361e-08	7.97126e-07	5.23895	6.34362	1570	2933	8.61658	16.58	14.6003	26.4168
450003	NM_001006024	gcdhb	glutaryl-CoA dehydrogenase b	protein_coding	NP_001006024.1	ZDB-GENE-041010-117	4.2143	3.99809	7.46343e-19	2.39662e-17	4.73939	2.82754	1098	223	12.2231	2.54108	20.7114	4.04869
450004	XM_009304861,XM_009304862,XM_009304863,XM_009304864,XM_009304865,XM_009304866,XM_009304867,XM_009304868,XM_009304869,XM_009304870,XM_009304871,XM_021479001,XM_021479002,XM_021479003	map2	microtubule-associated protein 2, transcript variant X5	protein_coding	XP_009303136.1;XP_009303137.1;XP_009303138.1;XP_009303139.1;XP_009303140.1;XP_009303141.1;XP_009303142.1;XP_009303143.1;XP_009303144.1;XP_009303145.1;XP_009303146.1;XP_021334676.1;XP_021334677.1;XP_021334678.1	ZDB-GENE-041010-118	2.07289	5.73502	6.72583e-07	4.59599e-06	6.18531	5.15472	3065	1266	8.22975	3.40488	13.9449	5.42499
450010	NM_001006031	rdh14a	retinol dehydrogenase 14a (all-trans/9-cis/11-cis)	protein_coding	NP_001006031.1	ZDB-GENE-041010-124	-2.09873	3.78927	2.31194e-06	1.41235e-05	3.30718	4.29856	380	683	3.68167	6.79137	6.23839	10.8207
450016	NM_001006037	pcyt2	phosphate cytidylyltransferase 2, ethanolamine	protein_coding	NP_001006037.1	ZDB-GENE-041010-132	-3.37162	3.33875	2.33635e-13	4.07805e-12	2.48879	4.04972	197	569	2.18776	6.48892	3.70704	10.3388
450019	NM_001006040	hspb7	heat shock protein family, member 7 (cardiovascular)	protein_coding	NP_001006040.1	ZDB-GENE-041010-136	2.76583	-0.554592	0.00408027	0.0116414	0.936025	0.409446	39	12	0.554792	0.166978	0.940066	0.266045
450022	NM_001006043	ctsz	cathepsin Z	protein_coding	NP_001006043.1	ZDB-GENE-041010-139	-2.00713	5.09109	2.76902e-06	1.67262e-05	4.5634	5.53768	967	1662	10.7971	19.07	18.2952	30.3842
450023	NM_001006044	cldn5b	claudin 5b	protein_coding	NP_001006044.2	ZDB-GENE-041010-140	5.16463	3.57091	4.19619e-22	1.8349e-20	4.37761	2.27164	845	140	7.94587	1.345	13.4639	2.14298
450025	NM_001006046,NM_001006046_dup1	cutc	cutC copper transporter homolog (E. coli)	protein_coding	NP_001006046.1	ZDB-GENE-041010-144	-2.76588	3.77188	1.65197e-10	2.02481e-09	3.0419	4.3936	309	732	4.13636	10.0883	4.43966	3.2669
450031	NM_001006052	tmem189	transmembrane protein 189	protein_coding	NP_001006052.1	ZDB-GENE-041010-150	-5.09706	2.88461	9.93639e-20	3.5007e-18	1.77058	3.73407	103	450	1.34955	6.11228	2.28674	9.73867
450047	NM_001006067,XM_005171578	syngr1a	synaptogyrin 1a	protein_coding	NP_001006067.1;XP_005171635.1	ZDB-GENE-041010-169	2.26374	2.48547	3.73993e-06	2.20527e-05	3.1178	2.1346	328	124	2.85848	1.02255	4.84354	1.62923
450053	NM_001006073,NM_001006073_dup1	angptl7	angiopoietin-like 7	protein_coding	NP_001006073.1	ZDB-GENE-041010-175	2.92777	0.652001	1.8117e-05	9.22875e-05	1.69955	0.820276	96	28	0.940079	0.281147	1.31405	0.288382
450059	NM_001006079	osr1	odd-skipped related transciption factor 1	protein_coding	NP_001006079.1	ZDB-GENE-070321-1	2.02283	2.98513	2.40484e-05	0.000119604	3.52533	2.63137	449	190	3.99773	1.73472	6.77394	2.76391
450064	NM_001006084	zgc:101664	zgc:101664	protein_coding	NP_001006084.1	ZDB-GENE-041010-187	-2.85515	0.525051	3.75212e-05	0.000178078	0.787362	1.6222	31	76	0.405128	1.02353	0.686468	1.63079
450084	NM_001006104,NM_001006104_dup1,XM_017353549	gss	glutathione synthetase	protein_coding	NP_001006104.1	ZDB-GENE-041010-208	-2.97675	1.65833	5.34527e-08	4.45609e-07	1.36116	2.505	67	171	0.520405	1.36264	0.261158	2.01701
474317	NM_001023575,XM_005168976,XM_009303318,XM_021477513	irx6a	iroquois homeobox 6a	protein_coding	NP_001018869.1;XP_005169033.1;XP_009301593.1;XP_021333188.1	ZDB-GENE-040712-5	2.35158	4.18353	3.30706e-08	2.85891e-07	4.72285	3.56102	1085	395	6.69524	2.51026	11.3447	3.99959
474318	NM_001020493	irx4b	iroquois homeobox 4b	protein_coding	NP_001018329.2	ZDB-GENE-040712-4	6.27625	0.456293	3.4841e-10	4.07117e-09	1.69955	0.438851	96	13	0.792634	0.108409	1.34308	0.172728
474325	NM_001007056	dck	deoxycytidine kinase	protein_coding	NP_001007057.1	ZDB-GENE-041024-3	-2.55995	1.60376	2.9089e-06	1.75058e-05	1.42546	2.41169	72	158	1.06921	2.40168	1.81172	3.82659
474328	NM_001007058,NM_001007058_dup1	crygm5	crystallin, gamma M5	protein_coding	NP_001007059.1	ZDB-GENE-041024-6	-94.9833	8.68071	6.62172e-135	2.32124e-131	3.25506	9.66734	365	29696	5.32193	444.762	9.01774	708.637
474331	NM_001007061	dolpp1	dolichyldiphosphatase 1	protein_coding	NP_001007062.1	ZDB-GENE-041024-11	-2.43949	2.3077	7.9188e-07	5.32639e-06	1.94742	2.99526	122	255	1.40089	3.0181	2.37374	4.80872
492328	NM_001007294	ankrd9	ankyrin repeat domain 9	protein_coding	NP_001007295.1	ZDB-GENE-041114-3	-4.37531	3.46545	1.06511e-18	3.38406e-17	2.34991	4.24339	175	656	2.30464	8.88601	3.90509	14.158
492331	NM_001007297,XM_005169359,XM_005169360	ace2	angiotensin I converting enzyme 2	protein_coding	NP_001007298.1;XP_005169416.1;XP_005169417.1	ZDB-GENE-041114-6	9.52295	0.126341	3.73319e-11	4.98225e-10	1.51092	0.252701	79	7	0.447172	0.037342	0.757708	0.059498
492346	NM_001328202,XM_005173641,XM_005173642	fosb	FBJ murine osteosarcoma viral oncogene homolog B	protein_coding	NP_001315131.1;XP_005173698.1;XP_005173699.1	ZDB-GENE-041114-181	-20.3049	5.43294	2.25259e-67	1.02997e-64	2.33659	6.38055	173	3010	0.370728	6.67958	0.62818	10.6425
492354	NM_001007320	fam83fb	family with sequence similarity 83, member Fb	protein_coding	NP_001007321.2	ZDB-GENE-041114-194	-2.36389	0.505546	0.00068116	0.00238953	0.863608	1.55665	35	71	0.306884	0.637712	0.519998	1.01606
492359	NM_001007325,NM_001007325_dup1,NM_001007325_dup2	zgc:91976	zgc:91976	protein_coding	NP_001007326.1	ZDB-GENE-041114-201	-2.08921	4.57739	1.10022e-06	7.15329e-06	4.0384	5.05499	659	1179	2.64505	4.86228	1.7866	2.08332
492469	NM_001007341,NM_001007341_dup1,NM_001328589,NM_001328589_dup1	arhgef39	Rho guanine nucleotide exchange factor (GEF) 39	protein_coding	NP_001007342.2;NP_001315518.1	ZDB-GENE-041114-28	-7.81371	-0.0430987	1.22151e-09	1.32981e-08	0.275901	1.41588	9	61	0.063956	0.482209	0.10837	0.7683
492470	NM_001007342,XM_021470482	spire2	spire-type actin nucleation factor 2	protein_coding	NP_001007343.2;XP_021326157.1	ZDB-GENE-041114-29	3.05362	0.59374	1.40873e-05	7.33955e-05	1.668	0.77488	93	26	0.512524	0.131525	0.868444	0.209558
492478	NM_001007350	slc25a44a	solute carrier family 25, member 44 a	protein_coding	NP_001007351.1	ZDB-GENE-041114-38	-5.54465	-0.307968	8.97687e-07	5.96747e-06	0.303537	1.20958	10	48	0.116869	0.572973	0.198029	0.912915
492484	NM_001007356	cyp2n13	cytochrome P450, family 2, subfamily N, polypeptide 13	protein_coding	NP_001007357.1	ZDB-GENE-041001-158	5.50983	0.669579	2.3675e-10	2.84547e-09	1.83828	0.550818	110	17	0.995135	0.15127	1.6862	0.241017
492485	NM_001007357,XM_005172993,XM_005172994,XM_005172995,XM_005172996,XM_021480055,XM_021480056,XM_021480057,XM_021480058,XM_021480059,XM_021480060,XM_021480061	lrrc20	leucine rich repeat containing 20	protein_coding	NP_001007358.1;XP_005173050.2;XP_005173051.2;XP_005173052.2;XP_005173053.2;XP_021335730.1;XP_021335731.1;XP_021335732.1;XP_021335733.1;XP_021335734.1;XP_021335735.1;XP_021335736.1	ZDB-GENE-041114-49	-27.1619	7.57719	5.86505e-85	4.4057e-82	3.86376	8.52885	579	13469	11.0457	264.93	18.7164	422.111
492486	NM_001007358,NM_001007358_dup1	adra1bb	adrenoceptor alpha 1Bb	protein_coding	NP_001007359.1	ZDB-GENE-041114-51	-6.05656	0.155289	1.96314e-09	2.06351e-08	0.383405	1.51585	13	68	0.103189	0.588916	0.174848	0.938317
492490	NM_001007362	slc6a1b	solute carrier family 6 (neurotransmitter transporter), member 1b	protein_coding	NP_001007363.1	ZDB-GENE-041114-57	2.55635	5.47472	2.54118e-10	3.02483e-09	6.01867	4.6987	2726	913	18.3234	6.3013	31.0481	10.0398
492513	NM_001007385,NM_001007385_dup1	clic5a	chloride intracellular channel 5a	protein_coding	NP_001007386.1	ZDB-GENE-041114-84	2.35909	-0.603966	0.0124967	0.0307396	0.882056	0.438851	36	13	0.288085	0.106482	0.488144	0.169657
492518	NM_001007390,XM_005156599	haao	3-hydroxyanthranilate 3,4-dioxygenase	protein_coding	NP_001007391.1;XP_005156656.1	ZDB-GENE-041114-89	-3.0956	2.24338	1.02106e-09	1.12263e-08	1.7202	3.01979	98	260	0.873498	1.56975	1.4801	2.50108
492525	NM_001007397,XM_009291799	tekt1	tektin 1	protein_coding	NP_001007398.1;XP_009290074.1	ZDB-GENE-041114-99	3.16259	3.51818	2.34837e-12	3.62919e-11	4.19416	2.69368	739	200	8.09254	2.24261	13.7124	3.57313
492576	XM_009302263	mylkb	myosin light chain kinase b	protein_coding	XP_009300538.1	ZDB-GENE-041111-150	-3.60578	-1.07079	0.00190528	0.0059439	0.247725	0.751635	8	25	0.031931	0.113129	0.054105	0.180249
492617	NM_001079953	isoc2	isochorismatase domain containing 2	protein_coding	NP_001073422.2	ZDB-GENE-070518-1	2.05641	3.53606	6.05606e-06	3.42044e-05	4.0466	3.0956	663	276	11.2593	4.80224	19.0783	7.65139
492696	XM_002665221	si:dkey-16j16.4	si:dkey-16j16.4	protein_coding	XP_002665267.1	ZDB-GENE-041111-271	-5.54663	1.40111	2.2195e-14	4.43331e-13	0.844921	2.44105	34	162	0.305427	1.53658	0.517531	2.44823
492702	XM_001341587,XM_009307054,XM_009307055,XM_021480705	mlip	muscular LMNA-interacting protein, transcript variant X1	protein_coding	XP_001341623.3;XP_009305329.1;XP_009305330.1;XP_021336380.1	ZDB-GENE-041111-277	3.28339	0.309889	1.63682e-05	8.42772e-05	1.48701	0.629436	77	20	0.332326	0.085276	0.563109	0.13587
492707	NM_001256205,NM_001256205_dup1,NM_001256205_dup2,NM_001256205_dup3	ncapg	non-SMC condensin I complex, subunit G	protein_coding	NP_001243134.1	ZDB-GENE-041111-282	-4.36038	1.7755	6.19757e-13	1.02641e-11	1.17919	2.70582	54	202	0.238728	0.921396	0.103468	0.217717
492757	NM_001007398	pacrg	PARK2 co-regulated	protein_coding	NP_001007399.1	ZDB-GENE-041114-100	-3.34279	0.691162	1.13512e-06	7.36201e-06	0.787362	1.77988	31	89	0.496663	1.48989	0.841569	2.37384
492764	NM_001007405	rbm41	RNA binding motif protein 41	protein_coding	NP_001007406.1	ZDB-GENE-041114-107	-4.28139	1.92837	2.61735e-13	4.54215e-12	1.28002	2.83308	61	224	0.414174	1.58055	0.701796	2.51828
492766	NM_001007407,NM_001007407_dup1,NM_001045229,NM_001045229_dup1,XM_017355009,XM_021475010	svopl	SVOP-like	protein_coding	NP_001007408.2;NP_001038694.1	ZDB-GENE-041114-109	3.25679	0.71451	2.61205e-06	1.5819e-05	1.77058	0.797757	103	27	0.598201	0.138896	0.372648	0.1371
492770	NM_001007411,XM_005171230	gorasp1a	golgi reassembly stacking protein 1a	protein_coding	NP_001007412.1;XP_005171287.1	ZDB-GENE-030826-23	-2.35434	2.1998	2.36136e-06	1.43867e-05	1.89388	2.88741	116	234	0.755926	1.59014	1.28088	2.53356
492780	NM_001007421,XM_009296976,XM_009296977	bin2a	bridging integrator 2a	protein_coding	NP_001007422.1;XP_009295251.1;XP_009295252.1	ZDB-GENE-041114-126	3.67912	0.362554	2.16716e-06	1.33047e-05	1.54605	0.603703	82	19	0.616494	0.147245	1.04462	0.234604
492794	NM_001007435	arhgap28	Rho GTPase activating protein 28	protein_coding	NP_001007436.1	ZDB-GENE-041114-147	2.00376	0.32435	0.0104472	0.0263314	1.37425	0.84245	68	29	0.591088	0.261225	1.00157	0.416208
492798	NM_001007439,XM_017357667,XM_021478645	slc37a1	solute carrier family 37 (glucose-6-phosphate transporter), member 1	protein_coding	NP_001007440.1;XP_017213156.1;XP_021334320.1	ZDB-GENE-041114-151	-2.65526	2.08114	1.79743e-07	1.38127e-06	1.7202	2.82754	98	223	0.490398	1.22298	0.830955	1.94857
492801	NM_001007442	pmpca	peptidase (mitochondrial processing) alpha	protein_coding	NP_001007443.1	ZDB-GENE-030131-5809	-2.44445	4.69866	3.64099e-09	3.69243e-08	4.00512	5.24071	643	1346	4.48679	9.65709	7.60263	15.3866
492802	NM_001007443	rhoua	ras homolog family member Ua	protein_coding	NP_001007444.1	ZDB-GENE-040618-3	-4.41336	3.91201	7.12738e-20	2.5582e-18	2.71144	4.67264	237	896	1.70918	6.65146	2.89612	10.5977
492803	NM_001007444,NM_001007444_dup1,XM_005157890,XM_017351342	zgc:101640	zgc:101640	protein_coding	NP_001007445.1	ZDB-GENE-041114-158	-2.42598	4.18011	9.67813e-09	9.12416e-08	3.53118	4.73471	451	937	5.18899	9.73453	5.65876	9.04851
492811	NM_001007452,XM_021479603	gnb4b	guanine nucleotide binding protein (G protein), beta polypeptide 4b	protein_coding	NP_001007453.1;XP_021335278.1	ZDB-GENE-041114-167	-2.168	3.69861	9.48066e-07	6.26645e-06	3.1973	4.22662	349	648	1.78456	3.46339	3.02385	5.5182
492818	NM_001328571,XM_017358316	slc35g2a	solute carrier family 35, member G2a	protein_coding	NP_001315500.1;XP_017213805.1	ZDB-GENE-041114-202	2.25888	2.32551	6.55688e-06	3.66492e-05	2.97473	2.01279	293	111	2.04992	0.81243	3.47348	1.29444
493181	NM_001007761,XM_009293389	fgf7	fibroblast growth factor 7	protein_coding	NP_001007762.1;XP_009291664.1	ZDB-GENE-080122-1	3.18477	0.638352	5.27826e-06	3.02418e-05	1.70991	0.77488	97	26	0.456743	0.12623	0.773927	0.201122
493587	NM_001007762	pcdh2ac	protocadherin 2 alpha c	protein_coding	NP_001007763.1	ZDB-GENE-041118-12	2.67204	0.286867	0.000294643	0.00113606	1.42546	0.70399	72	23	0.30844	0.099762	0.522636	0.158951
493589	NM_001009588	pcdh2ab1	protocadherin 2 alpha b 1	protein_coding	NP_001009588.1	ZDB-GENE-041118-1	2.41696	-0.146411	0.00405285	0.0115789	1.13373	0.577503	51	18	0.233896	0.084102	0.396325	0.133999
493590	NM_001008484	pcdh2ab3	protocadherin 2 alpha b 3	protein_coding	NP_001008484.1	ZDB-GENE-041118-3	3.37032	-1.47191	0.0211438	0.048088	0.554179	0.184902	20	5	0.089724	0.021983	0.152032	0.035025
493591	NM_001008483	pcdh2ab5	protocadherin 2 alpha b 5	protein_coding	NP_001008483.1	ZDB-GENE-041118-4	5.31671	-2.07941	0.0160841	0.0380407	0.383405	0.0768272	13	2	0.05846	0.007095	0.099058	0.011305
493592	NM_001009593	pcdh2ab6	protocadherin 2 alpha b 6	protein_coding	NP_001009593.1	ZDB-GENE-041118-5	13.9223	-1.81267	0.000252789	0.00098901	0.507414	0.038925	18	1	0.323144	0.002214	0.54755	0.003528
493593	NM_001009594	pcdh2ab7	protocadherin 2 alpha b 7	protein_coding	NP_001009594.1	ZDB-GENE-041118-6	2.09966	0.108913	0.00788991	0.0206635	1.25192	0.728009	59	24	1.07865	0.440241	1.82771	0.701434
493595	NM_001009596	pcdh2ab9	protocadherin 2 alpha b 9	protein_coding	NP_001009596.1	ZDB-GENE-041118-8	9.65679	-0.956113	6.16451e-06	3.47609e-05	0.863608	0.113759	35	3	0.158704	0.011108	0.268916	0.017699
493601	NM_001009586	pcdh2aa15	protocadherin 2 alpha a 15	protein_coding	NP_001009586.1	ZDB-GENE-041118-15	4.33366	-0.463236	4.70792e-05	0.000218687	1.05462	0.317457	46	9	0.207609	0.038401	0.351782	0.061184
493607	NM_001007767,XM_021475011,XM_021475012	net1	neuroepithelial cell transforming 1	protein_coding	NP_001007768.1;XP_021330686.1;XP_021330687.1	ZDB-GENE-041121-18	-2.43924	5.93838	1.25381e-09	1.36146e-08	5.19535	6.45844	1522	3179	7.92723	16.9708	13.4323	27.0396
493612	NM_001007772	zgc:101810	zgc:101810	protein_coding	NP_001007773.1	ZDB-GENE-041121-7	-2.29087	4.26496	7.00418e-08	5.74567e-07	3.66238	4.7928	498	977	5.41306	10.9181	9.17215	17.3957
493617	NM_001007777,NM_001007777_dup1	eif4eb	eukaryotic translation initiation factor 4eb	protein_coding	NP_001007778.1	ZDB-GENE-041121-14	-2.14488	3.3191	2.43315e-06	1.47866e-05	2.87234	3.8644	270	496	2.70395	5.11315	4.5817	8.14676
493628	NM_001007783	crygm2c	crystallin, gamma M2c	protein_coding	NP_001007784.1	ZDB-GENE-050516-11	-66.6346	9.77078	3.93898e-125	1.03561e-121	4.7457	10.7501	1103	62940	29.0918	1705.49	49.2946	2717.35
493629	NM_001007784	crygn1	crystallin, gamma N1	protein_coding	NP_001007785.1	ZDB-GENE-050225-1	-7.1312	8.91643	3.51394e-38	4.27218e-36	6.90496	9.72875	5075	30989	93.134	584.018	157.811	930.512
493634	NM_001007789,NM_001007789_dup1,NM_001011712,NM_001011712_dup1,NM_001045271,NM_001045271_dup1,XM_005157852,XM_005157853,XM_005157854	arnt	aryl hydrocarbon receptor nuclear translocator	protein_coding	NP_001007790.1;NP_001011712.1;NP_001038736.1	ZDB-GENE-060126-7	-2.34309	2.41208	1.56828e-06	9.89666e-06	2.05702	3.07233	135	271	0.58814	1.14289	0.695373	1.26138
493781	NM_001013274,XM_005164742	hgfa	hepatocyte growth factor a	protein_coding	NP_001013292.1;XP_005164799.1	ZDB-GENE-041014-2	2.29315	1.72589	3.08866e-05	0.000149963	2.46451	1.57	193	72	0.666254	0.254483	1.12893	0.405467
494041	NM_001008584,NM_001008584_dup1	slc7a2	solute carrier family 7 (cationic amino acid transporter, y+ system), member 2	protein_coding	NP_001008584.1	ZDB-GENE-041212-5	-6.94382	1.5451	1.36535e-17	3.8547e-16	0.787362	2.59917	31	185	0.151876	0.942847	0.257345	1.50223
494042	NM_001008585,NM_001008585_dup1,XM_009305270	slc43a2b	solute carrier family 43 (amino acid system L transporter), member 2b	protein_coding	NP_001008585.1;XP_009303545.1	ZDB-GENE-041212-6	2.38232	5.66294	3.99295e-09	4.02799e-08	6.17553	4.95041	3044	1094	14.2717	4.91495	17.0477	6.56055
494047	NM_001008590,XM_005169053	slc35c1	solute carrier family 35 (GDP-fucose transporter), member C1	protein_coding	NP_001008590.1;XP_005169110.1	ZDB-GENE-041212-11	-2.45219	3.08489	6.23681e-08	5.15235e-07	2.55927	3.70108	209	439	1.97882	4.68286	3.353	7.46118
494050	NM_001008593,XM_005160380	ndrg2	NDRG family member 2	protein_coding	NP_001008593.1;XP_005160437.1	ZDB-GENE-041212-15	-2.20817	3.4254	8.76473e-07	5.85048e-06	2.93993	3.97642	285	539	2.66523	5.29268	4.51609	8.4328
494052	NM_001008595,NM_001271770	gcga	glucagon a	protein_coding	NP_001008595.2;NP_001258699.1	ZDB-GENE-010219-1	-2.28802	1.58677	4.16855e-05	0.000195831	1.48701	2.35883	77	151	1.10973	1.74162	1.88038	2.77491
494061	NM_001008604,XM_017357320	zgc:103510	zgc:103510	protein_coding	NP_001008604.1;XP_017212809.1	ZDB-GENE-041212-27	-3.76742	2.43099	5.54842e-13	9.26925e-12	1.69955	3.24456	96	310	1.03956	3.46406	1.76148	5.51928
494064	NM_001008607	hsdl1	hydroxysteroid dehydrogenase like 1	protein_coding	NP_001008607.1	ZDB-GENE-041212-31	-3.11485	3.39083	4.18201e-12	6.27839e-11	2.60441	4.07335	217	579	2.13282	5.85219	3.61396	9.32427
494070	NM_001008613	tnni1b	troponin I type 1b (skeletal, slow)	protein_coding	NP_001008613.1	ZDB-GENE-041212-37	2.78357	-0.662626	0.00440277	0.0124417	0.882056	0.37943	36	11	0.58786	0.183567	0.996099	0.292476
494075	NM_001008618,XM_005171844	oclnb	occludin b	protein_coding	NP_001008618.1;XP_005171901.1	ZDB-GENE-041212-43	-5.34279	4.92269	1.79342e-26	1.06858e-24	3.39972	5.70207	408	1867	2.59704	12.2086	4.40055	19.4519
494079	NM_001008622,NM_001008622_dup1,XM_021476855	iqcb1	IQ motif containing B1	protein_coding	NP_001008622.1	ZDB-GENE-041212-47	2.63284	2.85253	1.75641e-08	1.58484e-07	3.50761	2.30396	443	144	2.73907	0.884471	2.74089	0.646995
494087	NM_001008630,XM_005172586	nxnl2	nucleoredoxin-like 2	protein_coding	NP_001008630.1;XP_005172643.2	ZDB-GENE-041212-55	2.53577	3.82157	4.37674e-09	4.38153e-08	4.40498	3.16322	862	291	13.9595	4.82985	23.6536	7.69538
494090	NM_001008633,XM_005163493,XM_009298615	bfsp2	beaded filament structural protein 2, phakinin	protein_coding	NP_001008633.1;XP_005163550.1;XP_009296890.1	ZDB-GENE-041212-58	-159.344	10.6146	5.80703e-160	1.22139e-155	4.36127	11.606	835	113944	6.93638	1039.38	11.7533	1656.03
494093	NM_001008636,XM_005162693	spice1	spindle and centriole associated protein 1	protein_coding	NP_001008636.1;XP_005162750.1	ZDB-GENE-041212-64	10.6969	2.76836	4.55143e-32	3.84459e-30	3.73521	1.10341	526	42	2.92082	0.234789	4.94917	0.374088
494098	NM_001008641	rab25a	RAB25, member RAS oncogene family a	protein_coding	NP_001008641.2	ZDB-GENE-041212-69	-2.27081	4.27912	8.93672e-08	7.21836e-07	3.68356	4.80273	506	984	3.63602	7.26547	6.16105	11.576
494102	NM_001008645	dhcr24	24-dehydrocholesterol reductase	protein_coding	NP_001008645.1	ZDB-GENE-041212-73	-3.24979	2.42202	8.71639e-11	1.10574e-09	1.80965	3.19373	107	298	0.905029	2.58665	1.53352	4.1213
494105	NM_001008648,XM_009306612	foxj1b	forkhead box J1b	protein_coding	NP_001008648.1;XP_009304887.1	ZDB-GENE-041212-76	2.32099	1.19545	0.000122735	0.00052109	2.04069	1.22654	133	49	0.797863	0.300329	1.35194	0.478513
494109	NM_001008652	ch25h	cholesterol 25-hydroxylase	protein_coding	NP_001008652.1	ZDB-GENE-041212-81	3.17876	2.23281	7.40164e-10	8.30287e-09	3.0087	1.6849	301	81	4.16253	1.14622	7.05319	1.82627
494129	NM_205586,NM_205586_dup1	prnpa	prion protein a	protein_coding	NP_991149.1	ZDB-GENE-041217-6	2.90682	4.10605	1.07281e-11	1.53082e-10	4.72923	3.28964	1090	321	18.7941	5.67182	31.8456	6.92471
494131	NM_001008731	gprc6a	G protein-coupled receptor, class C, group 6, member A	protein_coding	NP_001008731.1	ZDB-GENE-041217-22	4.15977	-1.86839	0.016576	0.0390375	0.434294	0.113759	15	3	0.089221	0.017599	0.151181	0.028041
494155	XM_005168258,XM_009292708	serpinb1l1	serpin peptidase inhibitor, clade B (ovalbumin), member 1, like 1, transcript variant X2	protein_coding	XP_005168315.1;XP_009290983.1	ZDB-GENE-040715-5	-2.05493	4.19788	2.74041e-06	1.65629e-05	3.69925	4.68036	512	901	5.09462	9.14726	8.63257	14.5743
494158	NM_181760,XM_005165606	anxa1c	annexin A1c	protein_coding	NP_861425.1;XP_005165663.1	ZDB-GENE-030131-5274	-5.95802	6.5947	7.52396e-32	6.30484e-30	4.8466	7.37923	1186	6051	14.7177	77.0518	24.9384	122.766
494168	NM_001009904,XM_021480569	six1a	SIX homeobox 1a	protein_coding	NP_001009904.1;XP_021336244.1	ZDB-GENE-040718-155	2.16323	-0.685343	0.0294307	0.0635997	0.825989	0.438851	33	13	0.282184	0.122546	0.478146	0.195252
494479	NM_001256207	perp	PERP, TP53 apoptosis effector	protein_coding	NP_001243136.1	ZDB-GENE-050104-1	-7.05735	9.24914	7.05816e-38	8.29354e-36	7.24828	10.0593	6450	38977	30.0334	186.402	50.89	296.993
494481	NR_036645,NR_036645_dup1	rpph1	ribonuclease P RNA component H1	RNase_P_RNA	.	ZDB-GENE-041229-3	-3.59761	1.32912	4.7144e-09	4.68832e-08	1.05462	2.28789	46	142	2.32037	7.34838	3.93174	11.7081
494493	NM_001009983,NM_001009983_dup1,NM_001009983_dup2	metrn	meteorin, glial cell differentiation regulator	protein_coding	NP_001009983.2	ZDB-GENE-050102-1	2.01332	1.83422	0.00029599	0.00114	2.50674	1.73317	200	85	0.961026	0.416902	0.603704	0.269656
494494	NM_001009985	rassf4	Ras association (RalGDS/AF-6) domain family member 4	protein_coding	NP_001009985.2	ZDB-GENE-050102-3	3.97296	0.124686	5.38373e-06	3.07669e-05	1.40008	0.49592	70	15	0.434224	0.095795	0.735769	0.152629
494572	NM_001011660,NM_001011660_dup1	guca1g	guanylate cyclase activator 1g	protein_coding	NP_001011660.1	ZDB-GENE-050120-1	2.87058	1.0925	3.49855e-06	2.07048e-05	2.02417	1.04724	131	39	3.57094	1.08789	1.25549	0.525427
497073	NM_001012253	xkr7	XK, Kell blood group complex subunit-related family, member 7	protein_coding	NP_001012253.2	ZDB-GENE-051113-336	-2.04599	1.32298	0.000573509	0.00205391	1.38722	2.10739	69	121	0.463771	0.841893	0.785835	1.34138
497076	NM_001012254,XM_021479610	xk	X-linked Kx blood group (McLeod syndrome)	protein_coding	NP_001012254.1;XP_021335285.1	ZDB-GENE-080908-1	2.37411	1.90977	6.54022e-06	3.65658e-05	2.63192	1.67258	222	80	1.3086	0.449572	2.21735	0.716301
497127	NM_001024099	pcdh1a4	protocadherin 1 alpha 4	protein_coding	NP_001019270.1	ZDB-GENE-050202-4	-16.1623	4.38808	1.44524e-54	3.53463e-52	1.78045	5.33659	104	1441	0.297833	4.23771	0.504662	6.75192
497129	NM_001024101	pcdh1a6	protocadherin 1 alpha 6	protein_coding	NP_001019272.1	ZDB-GENE-050203-2	346.72	5.27321	7.29687e-120	1.39523e-116	6.28442	0.285442	3286	8	9.60487	0.023612	16.2749	0.037621
497183	NM_001020525	grhpra	glyoxylate reductase/hydroxypyruvate reductase a	protein_coding	NP_001018361.1	ZDB-GENE-040724-230	2.82533	2.84489	1.6265e-09	1.73833e-08	3.52533	2.23858	449	136	5.09129	1.58042	8.62692	2.51808
497280	NM_001012369	ext1b	exostosin glycosyltransferase 1b	protein_coding	NP_001012369.2	ZDB-GENE-050211-4	-2.72719	1.70791	4.6194e-07	3.26368e-06	1.4504	2.51884	74	173	0.382931	0.923099	0.648856	1.47077
497302	XM_009292118,XM_009292119	si:dkeyp-77h1.4	si:dkeyp-77h1.4, transcript variant X2	protein_coding	XP_009290393.1;XP_009290394.1	ZDB-GENE-050208-18	2.50814	-0.187139	0.00337687	0.00986331	1.11825	0.550818	50	17	0.222877	0.076385	0.377653	0.121704
497317	NM_001202417	marveld1	MARVEL domain containing 1	protein_coding	NP_001189346.1	ZDB-GENE-050208-33	-2.88793	-1.28665	0.0191693	0.0441607	0.247725	0.629436	8	20	0.088097	0.232401	0.149277	0.370284
497348	NM_213549,XM_005155864,XM_005155868,XM_005155869,XM_005155870,XM_005155871,XM_005155872,XM_005155873,XM_017356482,XM_017356483,XM_021476856,XM_021476857,XM_021476858,XM_021476860,XM_021476861	matn4	matrilin 4	protein_coding	NP_998714.1;XP_005155921.1;XP_005155925.1;XP_005155926.1;XP_005155927.1;XP_005155928.1;XP_005155929.1;XP_005155930.1;XP_017211971.1;XP_017211972.1;XP_021332531.1;XP_021332532.1;XP_021332533.1;XP_021332535.1;XP_021332536.1	ZDB-GENE-050208-64	3.19478	2.96654	1.33142e-11	1.88578e-10	3.6783	2.2302	504	135	2.07996	0.548845	3.52438	0.874472
497373	XM_017357234	pkd1l2a	polycystic kidney disease 1 like 2a	protein_coding	XP_017212723.2	ZDB-GENE-050208-89	-3.10089	0.0689447	8.68484e-05	0.000379689	0.577005	1.33999	21	56	0.034115	0.094212	0.057807	0.150108
497399	XM_002660814	lrrc8da	leucine rich repeat containing 8 family, member Da	protein_coding	XP_002660860.1	ZDB-GENE-061009-26	-3.8033	1.88376	1.43521e-11	2.02324e-10	1.33462	2.76506	65	212	0.274918	0.933024	0.465835	1.48658
497465	XM_017358366,XM_021479893,XM_021479894,XM_021479895,XM_021479896,XM_021479897,XM_021479898	camta1b	calmodulin binding transcription activator 1b, transcript variant X7	protein_coding	XP_017213855.2;XP_021335568.1;XP_021335569.1;XP_021335570.1;XP_021335571.1;XP_021335572.1;XP_021335573.1	ZDB-GENE-080229-1	2.07542	5.9671	5.87949e-07	4.07592e-06	6.41526	5.37987	3602	1486	4.91932	2.09478	8.33554	3.3376
497615	NM_001012374,XM_005155462,XM_009297433	fut10	fucosyltransferase 10	protein_coding	NP_001012374.1;XP_005155519.1;XP_009295708.1	ZDB-GENE-081022-183	-2.65387	0.151551	0.000535418	0.00193164	0.664862	1.35549	25	57	0.203739	0.493517	0.345226	0.786318
497629	NM_001143918,NM_001143918_dup1	kitb	v-kit Hardy-Zuckerman 4 feline sarcoma viral oncogene homolog b	protein_coding	NP_001137390.1	ZDB-GENE-050916-2	2.71458	0.57372	9.31119e-05	0.000404549	1.62484	0.820276	89	28	0.467034	0.149676	0.791321	0.238477
503514	NM_001126478,XM_005167165,XM_005167166	angptl2b	angiopoietin-like 2b	protein_coding	NP_001119950.1;XP_005167222.1;XP_005167223.1	ZDB-GENE-050624-1	2.10406	2.62692	1.83983e-05	9.35842e-05	3.2156	2.30396	354	144	1.3773	0.643404	2.33375	1.02513
503516	NM_001012485,XM_005173954	blf	bloody fingers	protein_coding	NP_001012503.1;XP_005174011.1	ZDB-GENE-050721-1	3.56664	-0.534083	0.000430003	0.00159006	0.988048	0.348776	42	10	0.321825	0.07301	0.545316	0.116327
503521	NM_001012486,NM_001012486_dup1,XM_009306437,XM_009306438,XM_009306439,XM_009306440	pcdh15b	protocadherin-related 15b	protein_coding	NP_001012504.1;XP_009304712.1;XP_009304713.1;XP_009304714.1;XP_009304715.1	ZDB-GENE-050214-1	3.49811	3.30978	7.72258e-14	1.4451e-12	4.02808	2.42645	654	160	1.74056	0.424048	2.69885	0.558986
503533	NM_001012497	slc50a1	solute carrier family 50 (sugar efflux transporter), member 1	protein_coding	NP_001012515.1	ZDB-GENE-050220-11	-4.18648	1.1908	2.50163e-10	2.9862e-09	0.900271	2.21328	37	133	0.284169	1.06465	0.48151	1.69631
503537	NM_001012501,NM_001012501_dup1	slc29a2	solute carrier family 29 (equilibrative nucleoside transporter), member 2	protein_coding	NP_001012519.2	ZDB-GENE-050220-15	-6.50462	1.59555	2.0046e-17	5.51869e-16	0.844921	2.63137	34	190	0.247324	1.44284	0.419078	2.29887
503564	NM_001012616	drd4a	dopamine receptor D4a	protein_coding	NP_001012634.2	ZDB-GENE-070112-996	4.53123	4.76328	6.45895e-22	2.75002e-20	5.50381	3.4317	1895	358	10.7871	2.08833	18.2781	3.32732
503571	NM_001012656,NM_001012656_dup1	pcdh1gc5	protocadherin 1 gamma c 5	protein_coding	NP_001012674.2	ZDB-GENE-041118-16	2.25914	6.11339	2.5175e-08	2.21736e-07	6.59829	5.44109	4095	1552	14.5829	5.67628	3.94441	2.75303
503573	NM_001012658,NM_001012658_dup1	pcdh1gb2	protocadherin 1 gamma b 2	protein_coding	NP_001012676.2	ZDB-GENE-041118-19	-2.64992	2.66934	1.98237e-08	1.77125e-07	2.15887	3.34893	148	336	0.527471	1.23133	0.893773	1.96187
503586	NM_001013275,NM_001013275_dup1	crygs4	crystallin, gamma S4	protein_coding	NP_001013293.1	ZDB-GENE-050223-2	-28.5867	10.3114	3.46898e-90	2.91852e-87	6.44116	11.2624	3668	89786	94.8391	2384.22	160.7	3798.76
503594	NM_001013282,XM_005164209	il4r.1	interleukin 4 receptor, tandem duplicate 1	protein_coding	NP_001013300.1;XP_005164266.1	ZDB-GENE-050227-5	-2.32444	3.66536	1.07879e-07	8.56877e-07	3.10608	4.22452	325	647	3.05579	5.50829	5.17788	8.77633
503605	NM_001013292	supt7l	SPT7-like STAGA complex gamma subunit	protein_coding	NP_001013310.1	ZDB-GENE-050227-17	-3.76904	0.520312	2.42961e-07	1.82507e-06	0.664862	1.6849	25	81	0.263168	0.894072	0.445925	1.42452
503703	NM_001040376	pkz	protein kinase containing Z-DNA binding domains	protein_coding	NP_001035466.1	ZDB-GENE-050301-2	-2.51829	4.26547	2.14991e-09	2.24858e-08	3.57436	4.83212	466	1005	2.8109	6.22285	4.76292	9.91484
503733	XM_021468237,XM_021468238,XM_021468239,XM_021468240	snx13	sorting nexin 13, transcript variant X3	protein_coding	XP_021323912.1;XP_021323913.1;XP_021323914.1;XP_021323915.1	ZDB-GENE-050306-12	-2.4688	3.15233	4.60873e-08	3.88363e-07	2.60995	3.76632	218	461	0.891468	2.00492	1.51054	3.19442
503734	XM_009295992	si:dkey-19a16.2	si:dkey-19a16.2	protein_coding	XP_009294267.2	ZDB-GENE-050208-493	3.63093	-0.389239	0.000153408	0.000635287	1.07079	0.37943	47	11	0.482804	0.116969	0.818085	0.186367
503735	NM_001013313,NM_001013313_dup1,XM_009299281,XM_009299282,XM_009299283,XM_021470513	eps8l1	eps8-like1	protein_coding	NP_001013331.1	ZDB-GENE-050306-14	-2.24242	3.26377	6.8578e-07	4.67856e-06	2.7868	3.83152	252	484	1.89422	3.68707	3.20966	2.88021
503749	NM_001013327,XM_021467155	mettl10	methyltransferase like 10	protein_coding	NP_001013345.1;XP_021322830.1	ZDB-GENE-050306-30	2.2803	2.69617	1.92507e-06	1.1958e-05	3.31059	2.29595	381	143	7.33927	2.80384	12.436	4.46734
503754	XM_009299139	zgc:113102	zgc:113102	protein_coding	XP_009297414.1	ZDB-GENE-050306-35	2.41295	1.67503	9.50726e-06	5.11815e-05	2.43982	1.50198	189	67	1.3015	0.474497	2.20532	0.756014
503761	NM_001013339,XM_021470158	bmp6	bone morphogenetic protein 6	protein_coding	NP_001013357.1;XP_021325833.1	ZDB-GENE-050306-42	2.90837	-0.0382245	0.000486586	0.00177989	1.23767	0.550818	58	17	0.377529	0.108941	0.639703	0.173574
503763	NM_001013341,XM_021477523	ywhae2	tyrosine 3-monooxygenase/tryptophan 5-monooxygenase activation protein, epsilon polypeptide 2	protein_coding	NP_001013359.1;XP_021333198.1	ZDB-GENE-050306-44	-2.66206	4.43599	1.77737e-10	2.16842e-09	3.6783	5.01894	504	1149	2.5994	6.09916	4.40455	9.71777
503764	NM_001327869	zgc:112964	zgc:112964	protein_coding	NP_001314798.1	ZDB-GENE-050306-47	-2.6156	1.50194	2.39345e-06	1.45622e-05	1.34795	2.33557	66	148	0.538804	1.23449	0.912975	1.96691
503770	XR_002458419	zgc:113096	zgc:113096	misc_RNA	.	ZDB-GENE-050306-54	-2.97753	1.40343	2.39932e-07	1.80454e-06	1.20872	2.29595	56	143	0.179366	0.470394	0.303926	0.749477
503774	NM_001013352	tp53i11a	tumor protein p53 inducible protein 11a	protein_coding	NP_001013370.1	ZDB-GENE-050306-58	-2.83973	0.219777	0.000187747	0.000759108	0.664862	1.41588	25	61	0.190712	0.48583	0.323151	0.77407
503868	NM_001013353,XM_005162698	vipr1b	vasoactive intestinal peptide receptor 1b	protein_coding	NP_001013371.1;XP_005162755.1	ZDB-GENE-050311-6	3.55542	0.646576	1.07248e-06	6.98156e-06	1.74057	0.728009	100	24	0.448637	0.109348	0.760192	0.174224
503869	NM_001044764,NM_001044764_dup1,XM_005161175	btc	betacellulin, epidermal growth factor family member	protein_coding	NP_001038229.2;XP_005161232.1	ZDB-GENE-050311-1	-2.10747	-0.673253	0.0443348	0.0896298	0.459082	0.84245	16	29	0.239201	0.380475	0.159495	0.376779
503923	XM_021479675	si:ch211-159e12.5	si:ch211-159e12.5	protein_coding	XP_021335350.1	ZDB-GENE-050309-53	-39.2408	4.44276	5.342e-76	3.03671e-73	1.05462	5.43927	46	1550	0.174543	6.08998	0.295753	9.70314
504039	XM_002667777	im:7150988	im:7150988	protein_coding	XP_002667823.1	ZDB-GENE-050309-169	2.17345	0.66147	0.00133939	0.00436426	1.62484	0.968776	89	35	1.36366	0.553563	2.31066	0.881989
504088	NM_001199731,NM_001199731_dup1	enpep	glutamyl aminopeptidase	protein_coding	NP_001186660.1	ZDB-GENE-050309-218	2.14192	3.29547	2.74866e-06	1.6608e-05	3.83801	2.8496	568	227	2.84593	1.16861	4.82227	1.86194
541317	NM_001013446,NM_001013446_dup1,NM_001013446_dup2	gatb	glutamyl-tRNA(Gln) amidotransferase, subunit B	protein_coding	NP_001013464.2	ZDB-GENE-040724-131	-2.46593	2.70714	1.57267e-07	1.22149e-06	2.24691	3.35665	160	338	1.163	2.52169	1.71006	1.2063
541320	NM_001013448,NM_001013448_dup1,XM_009291986	itga6b	integrin, alpha 6b	protein_coding	NP_001013466.1	ZDB-GENE-050320-5	-4.55194	6.92509	3.43705e-24	1.78939e-22	5.48432	7.64552	1869	7285	6.72037	26.9421	6.95769	23.9502
541321	NM_001013449,XM_009299537,XM_017354105,XM_021470526,XM_021470529,XM_021470530	nmrk1	nicotinamide riboside kinase 1	protein_coding	NP_001013467.1;XP_009297812.1;XP_017209594.1;XP_021326201.1;XP_021326204.1;XP_021326205.1	ZDB-GENE-050320-8	8.17913	2.88169	3.47687e-28	2.31421e-26	3.80697	1.37082	555	58	4.22621	0.998705	7.1611	1.59123
541342	NM_001013469	spcs2	signal peptidase complex subunit 2	protein_coding	NP_001013487.1	ZDB-GENE-050320-32	-2.20371	3.17646	1.4361e-06	9.14209e-06	2.72683	3.74294	240	453	3.12222	6.05367	5.29043	9.64529
541358	NM_001013485	zgc:110782	zgc:110782	protein_coding	NP_001013503.1	ZDB-GENE-050320-51	-2.60067	2.15833	2.02854e-07	1.54756e-06	1.79025	2.88741	105	234	1.43402	3.29011	2.42988	5.24211
541363	NM_001013490,XM_005157733,XM_009291646,XM_009291647	zgc:113149	zgc:113149	protein_coding	NP_001013508.1;XP_005157790.1;XP_009289921.1;XP_009289922.1	ZDB-GENE-050320-56	2.0154	4.84407	2.91448e-06	1.75294e-05	5.29681	4.32242	1636	695	10.7796	4.78231	18.2655	7.61963
541374	NM_001013501	capn2a	calpain 2, (m/II) large subunit a	protein_coding	NP_001013519.1	ZDB-GENE-050320-69	-4.03515	4.42566	7.22078e-19	2.32937e-17	3.25152	5.14583	364	1258	2.34131	8.31712	3.96723	13.2516
541377	NM_001013504,NM_001013504_dup1,XM_021467644	pid1	phosphotyrosine interaction domain containing 1	protein_coding	NP_001013522.1;XP_021323319.1	ZDB-GENE-050320-72	-3.91706	-0.0567273	5.7756e-06	3.27788e-05	0.459082	1.30847	16	54	0.12064	0.437868	0.111477	0.071261
541381	NM_001013508	gnb1l	guanine nucleotide binding protein (G protein), beta polypeptide 1-like	protein_coding	NP_001013526.1	ZDB-GENE-050320-77	5.95408	1.80961	8.95513e-17	2.28862e-15	2.7819	0.988796	251	36	3.02987	0.437915	5.13395	0.697729
541384	NM_001013511,XM_017353828,XM_021470159,XM_021470160,XM_021470161,XM_021470162	mybpc2b	myosin binding protein C, fast type b	protein_coding	NP_001013529.2;XP_017209317.1;XP_021325834.1;XP_021325835.1;XP_021325836.1;XP_021325837.1	ZDB-GENE-050320-80	2.89941	0.869883	7.49952e-06	4.14335e-05	1.85705	0.927884	112	33	0.434674	0.12978	0.736531	0.206777
541385	NM_001013512,NM_001013512_dup1	tmem86a	transmembrane protein 86A	protein_coding	NP_001013530.1	ZDB-GENE-050320-81	-7.56398	0.193335	1.49193e-10	1.84154e-09	0.330654	1.57	11	72	0.109876	0.782373	0.18618	1.23282
541391	NM_001013518,XM_005163497,XM_009298617	faim2a	Fas apoptotic inhibitory molecule 2a	protein_coding	NP_001013536.1;XP_005163554.1;XP_009296892.1	ZDB-GENE-050320-88	-5.18335	0.827178	5.38066e-11	6.99885e-10	0.643394	1.97315	24	107	0.291857	1.3889	0.494536	2.21293
541395	NM_001013522,XM_005169763	lim2.5	lens intrinsic membrane protein 2.5	protein_coding	NP_001013540.1;XP_005169820.1	ZDB-GENE-050320-94	-11.4228	7.10312	5.24814e-53	1.21301e-50	4.53161	7.98758	945	9244	14.1024	141.888	23.8959	226.07
541403	NM_001013530,XM_005168624	tmem248	transmembrane protein 248	protein_coding	NP_001013548.1;XP_005168681.1	ZDB-GENE-050320-103	-4.37904	4.26608	1.71724e-20	6.51961e-19	3.0254	5.01284	305	1144	1.15658	4.42413	1.95976	7.04895
541404	NM_001013531,XM_005165305,XM_005165306,XM_021476142,XR_002458748	cdc42ep2	CDC42 effector protein (Rho GTPase binding) 2	protein_coding	NP_001013549.1;XP_005165362.1;XP_005165363.1;XP_021331817.1	ZDB-GENE-050320-104	-2.49341	4.58034	1.91451e-09	2.02148e-08	3.87532	5.13352	584	1247	1.15465	2.76828	1.9565	4.41069
541416	NM_001013543	arsa	arylsulfatase A	protein_coding	NP_001013561.2	ZDB-GENE-050320-118	3.14347	2.25537	8.39335e-10	9.34554e-09	3.0254	1.70924	305	83	2.49331	0.690214	4.22479	1.09971
541418	NM_001013545,NM_001013545_dup1	zgc:101564	zgc:101564	protein_coding	NP_001013563.2	ZDB-GENE-050320-120	-52.7631	3.43257	8.36706e-67	3.66634e-64	0.48345	4.47036	17	774	0.179194	8.41408	0.303634	13.4061
541419	NM_001013546,XM_005160685,XM_021468416	cx23	connexin 23	protein_coding	NP_001013564.1;XP_005160742.1;XP_021324091.1	ZDB-GENE-050320-121	-6.94766	1.63483	1.81219e-18	5.58063e-17	0.825989	2.67526	33	197	0.284035	1.79493	0.481283	2.85985
541430	NM_001013556	zgc:112998	zgc:112998	protein_coding	NP_001013574.1	ZDB-GENE-050320-134	-2.68137	0.0466322	0.000588384	0.00210253	0.621602	1.29245	23	53	0.244933	0.59672	0.415026	0.950752
541445	NM_001013570	ogn	osteoglycin	protein_coding	NP_001013588.1	ZDB-GENE-050208-650	2.02916	1.12107	0.00129586	0.00424415	1.93863	1.25987	121	51	1.22947	0.526929	2.08326	0.839553
541448	NM_001013573,XM_021481013,XM_021481015,XM_021481016	acrc	acidic repeat containing	protein_coding	NP_001013591.1;XP_021336688.1;XP_021336690.1;XP_021336691.1	ZDB-GENE-050320-153	4.82755	0.5939	5.6722e-09	5.56712e-08	1.76065	0.577503	102	18	0.681056	0.124534	1.15401	0.19842
541449	NM_001013574,NM_001013574_dup1	zgc:113516	zgc:113516	protein_coding	NP_001013592.1	ZDB-GENE-050320-154	-4.3394	1.06984	3.867e-10	4.49114e-09	0.825989	2.12559	33	123	0.652106	2.51491	0.614787	2.16272
541475	NM_001172627,NM_001172627_dup1,XM_021477524	itga11a	integrin, alpha 11a	protein_coding	NP_001166098.1;XP_021333199.1	ZDB-GENE-050324-1	-2.35346	3.92533	4.40344e-08	3.71659e-07	3.32752	4.47747	386	778	1.20797	2.52405	1.64371	3.7414
541480	XM_017355852	zgc:113119	zgc:113119	protein_coding	XP_017211341.1	ZDB-GENE-050327-3	3.78199	3.35216	2.56206e-15	5.70847e-14	4.09089	2.38927	685	155	3.03577	0.704	5.14395	1.12168
541493	NM_001014306	lifra	leukemia inhibitory factor receptor alpha a	protein_coding	NP_001014328.2	ZDB-GENE-050327-16	-6.24412	1.36718	2.45393e-15	5.47915e-14	0.767654	2.43377	30	161	0.112453	0.629599	0.190545	1.00314
541495	NM_001326378,XM_005163498,XM_009298618	ccdc24	coiled-coil domain containing 24	protein_coding	NP_001313307.1;XP_005163555.1;XP_009296893.1	ZDB-GENE-050327-18	5.11671	5.65154	3.29887e-26	1.93813e-24	6.40892	4.12174	3586	600	29.458	5.06186	49.915	8.06504
541497	NM_001014310,XM_021468818	slc47a1	solute carrier family 47 (multidrug and toxin extrusion), member 1	protein_coding	NP_001014332.2;XP_021324493.1	ZDB-GENE-050327-20	-3.05428	0.843819	2.95236e-06	1.77265e-05	0.900271	1.86899	37	97	0.2305	0.623032	0.39057	0.992674
541498	XM_017354851,XM_017354852,XM_021474766	zgc:113265	zgc:113265, transcript variant X2	protein_coding	XP_017210340.1;XP_017210341.1;XP_021330441.1	ZDB-GENE-050327-21	-12.445	2.25124	3.21369e-31	2.6301e-29	0.767654	3.28964	30	321	0.063594	1.64823	0.107757	2.62611
541506	NM_001014319	zgc:113227	zgc:113227	protein_coding	NP_001014341.1	ZDB-GENE-050327-32	2.1003	0.628615	0.00240092	0.00730171	1.5916	0.968776	86	35	0.826021	0.340798	1.39965	0.542993
541507	NM_001014320,XM_005173643,XM_005173644	ppp1r13l	protein phosphatase 1, regulatory subunit 13 like	protein_coding	NP_001014342.1;XP_005173700.1;XP_005173701.1	ZDB-GENE-050327-33	-3.06183	5.42394	8.49659e-14	1.5787e-12	4.4674	6.03734	902	2365	4.08726	11.0252	6.92564	17.5664
541512	NM_001014325	si:ch211-244b2.4	si:ch211-244b2.4	protein_coding	NP_001014347.1	ZDB-GENE-030131-8699	-2.70731	3.46742	7.94696e-10	8.88615e-09	2.79656	4.0966	254	589	1.81692	4.32229	3.07867	6.88668
541514	NM_001014327,XM_005172669,XM_005172670,XM_017357965	hhla2a.1	HERV-H LTR-associating 2a, tandem duplicate 1	protein_coding	NP_001014349.1;XP_005172726.1;XP_005172727.1;XP_017213454.1	ZDB-GENE-050327-45	-3.45003	5.55068	1.86084e-16	4.62091e-15	4.46281	6.20235	899	2656	8.45701	25.7297	14.33	40.995
541525	NM_001014338,XM_005170176,XM_009294917	smpdl3a	sphingomyelin phosphodiesterase, acid-like 3A	protein_coding	NP_001014360.1;XP_005170233.1;XP_009293192.1	ZDB-GENE-050327-61	-5.77698	1.22437	8.61114e-14	1.59716e-12	0.747673	2.30396	29	144	0.2565	1.30871	0.434626	2.08516
541535	NM_001014349,XM_005171289	golim4b	golgi integral membrane protein 4b	protein_coding	NP_001014371.2;XP_005171346.1	ZDB-GENE-050327-74	2.89247	1.10047	2.86061e-06	1.723e-05	2.03245	1.04724	132	39	0.8198	0.247128	1.38911	0.393748
541542	NM_001014356,XM_017351920	fam219b	family with sequence similarity 219, member B	protein_coding	NP_001014378.1;XP_017207409.1	ZDB-GENE-050327-82	-2.90184	1.12782	1.91104e-06	1.18794e-05	1.07079	2.07029	47	117	0.427209	1.0701	0.723884	1.70498
541544	XM_005163633,XM_005163634	rnf152	ring finger protein 152, transcript variant X1	protein_coding	XP_005163690.1;XP_005163691.1	ZDB-GENE-050327-84	-2.02049	1.01584	0.00147307	0.00475713	1.20872	1.86899	56	97	0.470479	0.83746	0.797201	1.33432
541547	NM_001014360	trim35-9	tripartite motif containing 35-9	protein_coding	NP_001014382.1	ZDB-GENE-091112-11	-3.37567	1.02533	1.01271e-07	8.06522e-07	0.936025	2.03222	39	113	0.274274	0.825168	0.464743	1.31474
541552	NM_001282173,NM_001282173_dup1,XM_005162314,XM_005162316,XM_005162321,XM_009296986,XM_021469796,XM_021469797,XM_021469798,XM_021469799,XM_021469800,XM_021469801	eya4	EYA transcriptional coactivator and phosphatase 4	protein_coding	NP_001269102.1	ZDB-GENE-050327-93	2.02006	1.60244	0.000497711	0.00181143	2.31639	1.57	170	72	0.872752	0.382505	1.19216	0.433255
544659	NM_001014823,XM_005167031	sema3ga	sema domain, immunoglobulin domain (Ig), short basic domain, secreted, (semaphorin) 3Ga	protein_coding	NP_001014823.1;XP_005167088.1	ZDB-GENE-050513-3	-2.55853	0.805771	6.48184e-05	0.000291745	0.970915	1.79132	41	90	0.196545	0.579198	0.333036	0.922834
544664	NM_001014826,NM_001014826_dup1,XM_005162170,XM_021469802	erbb3b	erb-b2 receptor tyrosine kinase 3b	protein_coding	NP_001014826.1;XP_005162227.1;XP_021325477.1	ZDB-GENE-050107-1	-2.13426	4.74759	4.60484e-07	3.25558e-06	4.17932	5.23024	731	1336	2.05888	4.05174	2.02742	6.45561
544665	NM_001014827,NM_001014827_dup1	stc2a	stanniocalcin 2a	protein_coding	NP_001014827.1	ZDB-GENE-041008-14	2.06562	3.78375	3.84139e-06	2.26066e-05	4.28361	3.31365	789	327	14.3403	6.09736	22.2128	5.91909
544667	NM_001014829,NM_001014829_dup1,NM_001257153,NM_001257153_dup1	flt1	fms-related tyrosine kinase 1 (vascular endothelial growth factor/vascular permeability factor receptor)	protein_coding	NP_001014829.3;NP_001244082.1	ZDB-GENE-050407-1	9.40615	0.450316	1.19722e-12	1.91346e-11	1.74057	0.317457	100	9	0.478367	0.034454	0.809945	0.054895
548335	NM_001017539,XM_005165311	micu2	mitochondrial calcium uptake 2	protein_coding	NP_001017539.2;XP_005165368.1	ZDB-GENE-030131-3374	-3.60887	5.63139	1.58187e-17	4.40098e-16	4.49163	6.29621	918	2837	6.03444	19.2001	10.225	30.5915
548337	NM_001017541,NM_001017541_dup1	hsh2d	hematopoietic SH2 domain containing	protein_coding	NP_001017541.2	ZDB-GENE-050410-3	-5.47701	1.93562	9.05242e-17	2.31067e-15	1.11825	2.89274	50	235	0.349823	1.70907	0.592757	2.72305
548339	NM_001017543,NM_001017543_dup1,XM_009291027,XM_009291029,XM_009291030,XM_021481017	zgc:113364	zgc:113364	protein_coding	NP_001017543.1;XP_009289302.1;XP_009289304.1;XP_009289305.1;XP_021336692.1	ZDB-GENE-050410-5	-3.06596	1.38289	1.25469e-07	9.89501e-07	1.17919	2.28789	54	142	0.713432	1.57669	1.17548	2.51214
548602	NM_001015062	myoc	myocilin	protein_coding	NP_001015062.1	ZDB-GENE-050425-2	2.27338	3.61901	2.60615e-07	1.94656e-06	4.16809	3.08168	725	273	4.4967	1.73507	7.61942	2.76448
550131	NM_001017559	morn4	MORN repeat containing 4	protein_coding	NP_001017559.1	ZDB-GENE-050417-7	2.41275	0.184825	0.00130803	0.00427335	1.33462	0.70399	65	23	0.732385	0.260677	1.24099	0.415335
550165	XM_002663531,XM_021479338	ponzr2	plac8 onzin related protein 2	protein_coding	XP_021335013.1	ZDB-GENE-050411-41	9.32274	0.582733	1.92345e-13	3.40251e-12	1.83828	0.348776	110	10	1.55042	0.145362	2.6271	0.231604
550224	NM_001017562,XM_021476148	lhfpl2b	lipoma HMGIC fusion partner-like 2b	protein_coding	NP_001017562.1;XP_021331823.1	ZDB-GENE-050417-10	-2.47451	2.14778	9.06131e-07	6.01789e-06	1.81926	2.8605	108	229	0.990676	2.16663	1.67865	3.45208
550232	NM_001017570,NM_001017570_dup1	cart2	cocaine- and amphetamine-regulated transcript 2	protein_coding	NP_001017570.1	ZDB-GENE-050417-23	-2.06817	1.27019	0.000486339	0.0017796	1.34795	2.07029	66	117	1.47313	2.70687	2.49614	4.31284
550250	NM_001017588,NM_001017588_dup1	zgc:110712	zgc:110712	protein_coding	NP_001017588.1	ZDB-GENE-050417-50	-3.49526	1.09915	2.83478e-08	2.47495e-07	0.953575	2.0982	40	120	0.344962	1.07612	0.584519	1.71457
550254	NM_001017592,NM_001017592_dup1,XM_005156142,XM_009306628	arhgap17a	Rho GTPase activating protein 17a	protein_coding	NP_001017592.1	ZDB-GENE-050417-56	-4.32935	3.03681	3.43686e-17	9.18519e-16	2.02417	3.83705	131	486	0.568538	2.52291	0.815688	2.78477
550264	NM_001017601	fcf1	FCF1 rRNA-processing protein	protein_coding	NP_001017601.1	ZDB-GENE-050417-67	-5.18138	5.78984	7.77262e-27	4.80828e-25	4.23958	6.55013	764	3390	10.7742	49.1063	18.2564	78.2408
550265	XM_009306304	zgc:110286	zgc:110286	protein_coding	XP_009304579.3	ZDB-GENE-050417-68	2.13336	-0.265852	0.0185387	0.0429594	1.03826	0.577503	45	18	0.595354	0.24159	1.0088	0.384925
550268	NM_001017605,XM_021476151,XM_021476152	zgc:110283	zgc:110283	protein_coding	NP_001017605.1;XP_021331826.1;XP_021331827.1	ZDB-GENE-050417-72	-2.16704	4.70014	2.96151e-07	2.18867e-06	4.12032	5.19081	700	1299	9.04368	17.2293	15.324	27.4513
550273	NM_001017610	ascc1	activating signal cointegrator 1 complex subunit 1	protein_coding	NP_001017610.1	ZDB-GENE-050417-80	-2.17525	3.44547	1.22769e-06	7.91598e-06	2.97042	3.98889	292	544	3.93642	7.54133	6.67006	12.0156
550275	NM_001017612,NM_001017612_dup1,XM_005171851	ptcd2	pentatricopeptide repeat domain 2	protein_coding	NP_001017612.1;XP_005171908.1	ZDB-GENE-050417-82	2.53921	2.57838	1.28613e-07	1.01277e-06	3.2444	2.11652	362	122	4.02184	1.38214	2.44687	2.20216
550289	NM_001017626	pcyox1	prenylcysteine oxidase 1	protein_coding	NP_001017626.1	ZDB-GENE-050417-98	-4.65187	0.758179	8.64189e-10	9.59688e-09	0.664862	1.90103	25	100	0.213444	0.876697	0.36167	1.39684
550321	NM_001017628,XM_005159719	asb4	ankyrin repeat and SOCS box containing 4	protein_coding	NP_001017628.1;XP_005159776.1	ZDB-GENE-050417-100	2.00305	2.57947	6.82021e-05	0.000305667	3.15241	2.30396	337	144	3.27006	1.42017	5.54095	2.26275
550328	NM_001017635	park2	parkin RBR E3 ubiquitin protein ligase	protein_coding	NP_001017635.1	ZDB-GENE-050417-109	2.00221	2.14247	0.000153755	0.0006366	2.76709	1.96306	248	106	2.69784	1.18187	4.57134	1.88308
550330	NM_001017637	prrg4	proline rich Gla (G-carboxyglutamic acid) 4 (transmembrane)	protein_coding	NP_001017637.1	ZDB-GENE-050417-112	-2.12148	2.77335	9.18737e-06	4.96883e-05	2.42102	3.35665	186	338	1.47449	2.75777	2.49845	4.39394
550332	NM_001017639	dctd	dCMP deaminase	protein_coding	NP_001017639.1	ZDB-GENE-050417-116	-3.74948	0.622413	1.72431e-07	1.32945e-06	0.706862	1.75671	27	87	0.285832	0.970343	0.484327	1.54604
550336	NM_001017643,XM_021468819	zgc:110222	zgc:110222	protein_coding	NP_001017643.1;XP_021324494.1	ZDB-GENE-050417-121	-2.55325	0.837612	5.13921e-05	0.000236734	0.988048	1.81394	42	92	0.513546	1.26462	0.870177	2.01491
550337	NM_001017644,XM_009304977,XM_017357673	slc38a11	solute carrier family 38, member 11	protein_coding	NP_001017644.1;XP_009303252.1;XP_017213162.1	ZDB-GENE-050417-122	2.67646	0.654709	7.08083e-05	0.000316068	1.6786	0.864287	94	30	0.776292	0.249475	1.31539	0.397487
550339	NM_001017646,NM_001017646_dup1,XM_009295306	wdr73	WD repeat domain 73	protein_coding	NP_001017646.1	ZDB-GENE-050417-126	2.30125	2.44317	3.13459e-06	1.87247e-05	3.08633	2.08896	320	119	3.50146	1.39377	1.94597	2.22069
550357	NM_001017664,NM_001017664_dup1,NM_001017664_dup2,XM_021470164,XM_021470165,XM_021470166	cremb	cAMP responsive element modulator b	protein_coding	NP_001017664.1;XP_021325839.1;XP_021325840.1;XP_021325841.1	ZDB-GENE-050417-150	-4.0132	0.798605	1.5163e-08	1.38362e-07	0.747673	1.90103	29	100	0.280447	0.972201	0.354811	0.904761
550360	NM_001017667	mfsd10	major facilitator superfamily domain containing 10	protein_coding	NP_001017667.1	ZDB-GENE-050417-154	-2.71674	2.87717	4.05032e-09	4.07804e-08	2.30276	3.54758	168	391	1.34315	3.21524	2.27589	5.12282
550361	XM_005164059,XM_009299563,XM_021474192,XM_021474195,XM_021474199	cpt1cb	carnitine palmitoyltransferase 1Cb, transcript variant X4	protein_coding	XP_005164116.1;XP_009297838.1;XP_021329867.1;XP_021329870.1;XP_021329874.1	ZDB-GENE-050417-155	-17.1213	2.63147	7.36982e-40	9.68809e-38	0.747673	3.66421	29	427	0.152915	2.37816	0.259108	3.78911
550365	XM_009298961	ftr29	finTRIM family, member 29	protein_coding	XP_009297236.1	ZDB-GENE-050417-159	-2.57687	2.02079	4.89174e-07	3.43762e-06	1.69955	2.76506	96	212	0.653836	1.48352	1.10789	2.36368
550377	NM_001017682,XM_005173648,XM_005173649,XM_005173650,XM_009293805,XM_009293807	sema6dl	sema domain, transmembrane domain (TM), and cytoplasmic domain, (semaphorin) 6D, like	protein_coding	NP_001017682.2;XP_005173705.1;XP_005173706.1;XP_005173707.1;XP_009292080.1;XP_009292082.1	ZDB-GENE-050417-171	-2.18023	4.00109	5.19996e-07	3.64327e-06	3.46542	4.51764	429	801	1.53817	3.2813	2.60635	5.22808
550378	NM_001017683,NM_001017683_dup1	rab42b	RAB42, member RAS oncogene family	protein_coding	NP_001017683.2	ZDB-GENE-050417-172	-4.75046	2.9209	1.24868e-18	3.92098e-17	1.85705	3.75175	112	456	1.64382	6.90237	2.48715	9.13326
550380	NM_001017685	cx35.4	connexin 35.4	protein_coding	NP_001017685.1	ZDB-GENE-050417-174	-3.6136	5.49797	1.82498e-17	5.03738e-16	4.36291	6.16489	836	2587	6.19956	19.7032	10.5048	31.393
550384	NM_001017689	zgc:112001	zgc:112001	protein_coding	NP_001017689.2	ZDB-GENE-050417-178	2.63347	1.35142	6.51148e-06	3.64633e-05	2.20357	1.2433	154	50	1.13782	0.377351	1.92798	0.601232
550388	NM_001017693,XM_005156994	srd5a2b	steroid-5-alpha-reductase, alpha polypeptide 2b	protein_coding	NP_001017693.1;XP_005157051.1	ZDB-GENE-050417-182	-2.39833	1.10339	6.05789e-05	0.000275374	1.1642	1.99311	53	109	0.590259	1.26118	1.00016	2.00943
550389	NM_001017694,XM_005173555	osr2	odd-skipped related transciption factor 2	protein_coding	NP_001017694.1;XP_005173612.1	ZDB-GENE-050417-183	3.12828	1.44554	9.98487e-08	7.97008e-07	2.32989	1.19242	172	47	2.25584	0.650571	3.8224	1.03655
550398	NM_001017703	srd5a2a	steroid-5-alpha-reductase, alpha polypeptide 2a	protein_coding	NP_001017703.1	ZDB-GENE-050417-199	-7.76536	6.43026	1.81685e-39	2.37353e-37	4.36947	7.26459	840	5586	12.6936	86.7695	21.5086	138.249
550404	NM_001017709	gpd1a	glycerol-3-phosphate dehydrogenase 1a	protein_coding	NP_001017709.1	ZDB-GENE-050417-209	3.56721	0.530162	1.15469e-06	7.48202e-06	1.65733	0.679564	92	22	1.00864	0.238023	1.70909	0.379241
550405	NM_001017710,NM_001037243,XM_017353139,XM_021469324	lhx9	LIM homeobox 9	protein_coding	NP_001017710.2;NP_001032320.2;XP_017208628.1;XP_021324999.1	ZDB-GENE-050417-210	2.71542	3.60431	6.27411e-10	7.09862e-09	4.22339	2.90859	755	238	4.49516	1.45023	7.61681	2.31065
550410	NM_001017715	zgc:112183	zgc:112183	protein_coding	NP_001017715.1	ZDB-GENE-050417-216	-4.02155	-0.116514	5.20702e-06	2.98906e-05	0.434294	1.27626	15	52	0.286845	1.05549	0.486044	1.68171
550414	NM_001017719	zgc:112175	zgc:112175	protein_coding	NP_001017719.1	ZDB-GENE-050417-220	-2.53026	1.57199	4.64393e-06	2.68914e-05	1.41283	2.38172	71	154	0.849295	1.89842	1.43909	3.02474
550419	NM_001017724,NM_001017724_dup1	zgc:112160	zgc:112160	protein_coding	NP_001017724.1	ZDB-GENE-050417-229	2.88945	-0.749998	0.00474403	0.0132811	0.844921	0.348776	34	10	0.327762	0.092975	0.555376	0.148137
550421	NM_001017726,XM_017357326	znf367	zinc finger protein 367	protein_coding	NP_001017726.1;XP_017212815.1	ZDB-GENE-050417-231	-3.23453	2.92983	7.06481e-12	1.0333e-10	2.19621	3.65484	153	424	0.613465	1.69978	1.03948	2.70824
550425	NM_001017730	b4galt1	UDP-Gal:betaGlcNAc beta 1,4- galactosyltransferase, polypeptide 1	protein_coding	NP_001017730.1	ZDB-GENE-050417-236	-2.60116	1.65909	1.84961e-06	1.15268e-05	1.4504	2.46269	74	165	0.927672	2.14183	1.57189	3.41256
550430	NM_001017735	mpped2a	metallophosphoesterase domain containing 2a	protein_coding	NP_001017735.1	ZDB-GENE-050417-241	2.13279	2.4496	1.79369e-05	9.15475e-05	3.06226	2.15246	314	126	3.74796	1.53827	6.35072	2.45092
550432	NM_001017737,NM_001017737_dup1	slc27a4	solute carrier family 27 (fatty acid transporter), member 4	protein_coding	NP_001017737.1	ZDB-GENE-050417-248	-2.09797	0.391718	0.00377352	0.0108635	0.863608	1.44516	35	63	0.220459	0.408352	0.373557	0.650625
550433	NM_001017738	cryba1l1	crystallin, beta A1, like 1	protein_coding	NP_001017738.1	ZDB-GENE-050417-249	-9.9129	8.15593	2.97296e-49	6.07089e-47	5.73514	9.01997	2232	18946	38.7455	337.829	65.6522	538.262
550434	NM_001017739	mad2l1	MAD2 mitotic arrest deficient-like 1 (yeast)	protein_coding	NP_001017739.1	ZDB-GENE-030515-3	-2.07994	1.88062	0.000115582	0.000492709	1.75064	2.56624	101	180	1.80663	3.31527	3.06125	5.28221
550435	NM_001017740	rfesd	Rieske (Fe-S) domain containing	protein_coding	NP_001017740.1	ZDB-GENE-050417-254	2.72672	-0.272169	0.00225486	0.0069024	1.08678	0.49592	48	15	0.807334	0.257315	1.36799	0.409979
550445	NM_001017750	acta1a	actin, alpha 1a, skeletal muscle	protein_coding	NP_001017750.1	ZDB-GENE-050417-267	2.34434	3.35328	1.65741e-07	1.28219e-06	3.92954	2.82197	608	222	5.93315	2.22358	10.0534	3.54282
550458	NM_001017762,NM_001328501	tubb6	tubulin, beta 6 class V	protein_coding	NP_001017762.2;NP_001315430.1	ZDB-GENE-070424-195	-2.36815	5.02377	8.50182e-09	8.08038e-08	4.34308	5.5453	824	1671	8.42425	17.5517	14.2744	27.9651
550460	NM_001017763,NM_001017763_dup1,XM_021470488	hexa	hexosaminidase A (alpha polypeptide)	protein_coding	NP_001017763.1	ZDB-GENE-050417-283	-2.00017	2.4738	6.71525e-05	0.000301605	2.2254	3.06292	157	269	1.29094	2.168	2.18743	3.34233
550467	NM_001017770,XM_005158841,XM_009293194,XM_009293195	slc24a4a	solute carrier family 24 (sodium/potassium/calcium exchanger), member 4a	protein_coding	NP_001017770.1;XP_005158898.1;XP_009291469.1;XP_009291470.1	ZDB-GENE-050417-291	3.37362	2.1306	2.09271e-10	2.53695e-09	2.93552	1.57	284	72	1.95572	0.418354	3.31387	0.66656
550475	NM_001017778	ctsk	cathepsin K	protein_coding	NP_001017778.1	ZDB-GENE-001205-4	-2.38669	5.99005	2.9688e-09	3.04302e-08	5.26729	6.50044	1602	3274	15.6789	32.9147	26.5671	52.4428
550481	NM_001017784	rhoub	ras homolog family member Ub	protein_coding	NP_001017784.2	ZDB-GENE-050417-308	-5.1405	5.42948	3.09916e-26	1.8259e-24	3.90944	6.19213	599	2637	2.27156	10.2691	3.84904	16.3617
550482	NM_001017785	zgc:110353	zgc:110353	protein_coding	NP_001017785.1	ZDB-GENE-050417-310	3.35704	-1.742	0.0250426	0.0555728	0.459082	0.149769	16	4	0.198315	0.052938	0.336034	0.084346
550483	NM_001017786,XM_021470640	znf750	zinc finger protein 750	protein_coding	NP_001017786.1;XP_021326315.1	ZDB-GENE-050417-313	-2.85446	4.9306	4.22544e-12	6.33003e-11	4.07092	5.52745	675	1650	4.21809	10.5053	7.14734	16.7381
550484	NM_001017787	leprot	leptin receptor overlapping transcript	protein_coding	NP_001017787.1	ZDB-GENE-050417-314	-3.89898	2.89387	6.15211e-15	1.31368e-13	2.00746	3.6766	129	431	1.27281	4.36997	2.1567	6.96265
550489	NM_001204222	ccs	copper chaperone for superoxide dismutase	protein_coding	NP_001191151.2	ZDB-GENE-050417-322	-2.23569	-0.0145369	0.00657299	0.0176858	0.664862	1.20958	25	48	0.436977	0.865911	0.740435	1.37965
550500	NM_001017802,NM_001017802_dup1	zgc:110329	zgc:110329	protein_coding	NP_001017802.1	ZDB-GENE-050417-334	2.6028	1.81415	1.27859e-06	8.22149e-06	2.58201	1.54318	213	70	1.72324	0.578084	1.51697	0.828193
550507	NM_001017809,XM_005160067,XM_005160068	bdh2	3-hydroxybutyrate dehydrogenase, type 2	protein_coding	NP_001017809.1;XP_005160124.1;XP_005160125.1	ZDB-GENE-050417-343	-2.9244	3.16177	1.09004e-10	1.36713e-09	2.47062	3.83705	194	486	2.7375	7.11199	4.63854	11.3315
550512	NM_001017814,XM_005166841,XM_017357327	spata6	spermatogenesis associated 6	protein_coding	NP_001017814.1;XP_005166898.1;XP_017212816.1	ZDB-GENE-050417-351	-2.35548	1.00324	0.000161875	0.000665762	1.11825	1.91156	50	101	0.279435	0.609555	0.473488	0.9712
550522	NM_001017824	krt92	keratin 92	protein_coding	NP_001017824.1	ZDB-GENE-050417-363	3.38502	2.78858	4.72075e-12	7.04695e-11	3.53118	2.04183	451	114	4.94364	1.27879	8.37674	2.03749
550523	NM_001017825	stoml3b	stomatin (EPB72)-like 3b	protein_coding	NP_001017825.1	ZDB-GENE-050417-366	2.31245	0.681621	0.000521197	0.00188642	1.65733	0.948475	92	34	1.18265	0.442636	2.00393	0.705249
550528	NM_001017830,XM_009299879	baiap2l1b	BAI1-associated protein 2-like 1b	protein_coding	NP_001017830.1;XP_009298154.1	ZDB-GENE-050417-371	-4.01336	5.02981	1.66245e-19	5.66714e-18	3.80938	5.73504	556	1911	3.31861	11.7215	5.62321	18.6759
550534	NM_001017836	zgc:110183	zgc:110183	protein_coding	NP_001017836.1	ZDB-GENE-050417-380	-7.94149	-1.09972	6.44259e-06	3.61545e-05	0.129173	0.820276	4	28	0.066133	0.476273	0.112059	0.758844
550538	NM_001017840	rasl11a	RAS-like, family 11, member A	protein_coding	NP_001017840.2	ZDB-GENE-050417-384	2.31232	1.04092	0.000180466	0.000733334	1.9209	1.13967	119	44	2.41464	0.900901	4.09147	1.4354
550541	NM_001017843,XM_005172467	nudt18	nudix (nucleoside diphosphate linked moiety X)-type motif 18	protein_coding	NP_001017843.1;XP_005172524.1	ZDB-GENE-050417-388	2.57632	2.14424	3.80604e-07	2.73964e-06	2.86308	1.77988	268	89	3.41289	1.16596	5.78297	1.85771
550542	NM_001017844,NM_001017844_dup1	chmp4c	charged multivesicular body protein 4C	protein_coding	NP_001017844.1	ZDB-GENE-050417-389	-2.85066	2.46898	4.39148e-09	4.3942e-08	1.94742	3.19373	122	298	1.68884	4.26255	2.86165	6.7915
550549	NM_001017851,NM_001017851_dup1,XM_005156639,XM_021480575	eif4e1c	eukaryotic translation initiation factor 4E family member 1c	protein_coding	NP_001017851.2	ZDB-GENE-050417-398	-3.17231	5.16552	2.28765e-14	4.55461e-13	4.1849	5.79525	734	1994	6.45712	17.9524	10.9412	23.1576
550552	NM_001017854	atg16l1	ATG16 autophagy related 16-like 1 (S. cerevisiae)	protein_coding	NP_001017854.1	ZDB-GENE-050417-401	-3.55721	1.67071	6.05976e-10	6.86718e-09	1.25192	2.56624	59	180	0.788758	2.4724	1.33651	3.93926
550555	NM_001017857,NM_001017857_dup1,XM_005155443,XM_005155444	slc35e4	solute carrier family 35, member E4	protein_coding	NP_001017857.1;XP_005155500.1;XP_005155501.1	ZDB-GENE-050417-407	-3.70457	-1.89742	0.0384743	0.0796408	0.129173	0.438851	4	13	0.023199	0.091462	0.039309	0.145725
550557	NM_001017859,NM_001017859_dup1,XM_005155951,XM_005155953,XM_021479612	palm1a	paralemmin 1a	protein_coding	NP_001017859.1	ZDB-GENE-050417-409	-9.58785	4.70408	5.72169e-42	8.2996e-40	2.56499	5.59022	210	1725	1.80561	15.2536	1.62786	12.9589
550565	NM_001017867,NM_001017867_dup1,NM_001017867_dup2	gnpda1	glucosamine-6-phosphate deaminase 1	protein_coding	NP_001017867.1	ZDB-GENE-050417-417	-2.21697	2.399	7.61142e-06	4.20076e-05	2.08913	3.03912	139	264	2.09186	4.09692	2.25087	2.11705
550569	NM_001017871	myl10	myosin, light chain 10, regulatory	protein_coding	NP_001017871.1	ZDB-GENE-050417-421	2.46543	3.83639	1.18874e-08	1.10388e-07	4.40817	3.20232	864	300	19.8634	7.08857	33.6576	11.2942
550573	NM_001017875,XM_021480107	c1qtnf1	C1q and TNF related 1	protein_coding	NP_001017875.1;XP_021335782.1	ZDB-GENE-050417-427	-3.29786	2.54145	2.25187e-11	3.10174e-10	1.88476	3.30569	115	325	0.672649	1.99986	1.13977	3.18637
550584	NM_001017885,XM_021467652	chrna5	cholinergic receptor, nicotinic, alpha 5	protein_coding	NP_001017885.1;XP_021323327.1	ZDB-GENE-050417-440	5.94982	0.392701	1.76111e-09	1.87078e-08	1.64658	0.438851	91	13	0.612144	0.086291	1.03725	0.137486
550598	NM_001017899	capns1a	calpain, small subunit 1 a	protein_coding	NP_001017899.2	ZDB-GENE-030113-3	-2.66541	8.10124	1.36935e-11	1.93819e-10	7.23668	8.64507	6398	14602	77.2949	181.16	130.972	288.641
550602	NM_001017903,NM_001348483,XM_005164743,XM_009300279,XM_021475014	epyc	epiphycan	protein_coding	NP_001017903.3;NP_001335412.1;XP_005164800.1;XP_009298554.1;XP_021330689.1	ZDB-GENE-041008-9	3.83833	2.86545	2.32964e-14	4.62694e-13	3.63816	1.99311	489	109	2.65088	0.568513	4.49178	0.90581
550608	NM_001017909,XM_021468057	apoa4a	apolipoprotein A-IV a	protein_coding	NP_001017909.1;XP_021323732.1	ZDB-GENE-050417-469	4.01609	-0.2806	2.69074e-05	0.000132168	1.14904	0.37943	52	11	0.751948	0.158831	1.27414	0.253064
550609	NM_001017910,XM_005158424	rpz4	rapunzel 4	protein_coding	NP_001017910.1;XP_005158481.1	ZDB-GENE-050417-472	-5.68527	2.90074	5.60135e-22	2.40435e-20	1.68911	3.77211	95	463	0.82784	4.29539	1.40273	6.84382
552927	NM_001020497,NM_001020497_dup1	casp6	caspase 6, apoptosis-related cysteine peptidase	protein_coding	NP_001018333.1	ZDB-GENE-030825-4	-8.13823	1.49453	2.41739e-19	8.05783e-18	0.686014	2.5795	26	182	0.255933	1.83865	0.433665	2.92952
552978	NM_001162502,XM_005171381	ncapd2	non-SMC condensin I complex, subunit D2	protein_coding	NP_001155974.2;XP_005171438.1	ZDB-GENE-050506-59	-3.30848	3.45688	2.77262e-13	4.77613e-12	2.60441	4.15535	217	615	0.757896	2.22263	1.28422	3.54131
552994	XM_003198184,XM_009299838,XM_017354840	im:6904045	im:6904045, transcript variant X1	protein_coding	XP_003198232.2;XP_009298113.1;XP_017210329.1	ZDB-GENE-050506-75	-3.57232	2.11023	2.46483e-11	3.37718e-10	1.52272	2.94491	80	245	2.39894	7.68107	4.06487	12.2382
553062	XM_005170798,XM_005170799	si:ch73-70c5.1	si:ch73-70c5.1, transcript variant X2	protein_coding	XP_005170855.1;XP_005170856.1	ZDB-GENE-050506-143	-3.56008	3.81507	3.10214e-15	6.84651e-14	2.83967	4.51936	263	802	2.10692	6.59161	3.57007	10.5024
553162	NM_001020508	hs6st1a	heparan sulfate 6-O-sulfotransferase 1a	protein_coding	NP_001018344.2	ZDB-GENE-050524-1	2.01256	0.420334	0.00716368	0.0190293	1.43798	0.885799	73	31	0.627565	0.271838	1.06337	0.433119
553178	NM_001018125,XM_009305688	cryba4	crystallin, beta A4	protein_coding	NP_001018135.1;XP_009303963.1	ZDB-GENE-050522-143	-14.7132	10.0032	4.73336e-64	1.7165e-61	7.04021	10.909	5578	70274	120.749	1564.48	204.602	2492.68
553184	NM_001018130	crybb3	crystallin, beta B3	protein_coding	NP_001018140.1	ZDB-GENE-060130-2	-21.9082	12.1239	1.25475e-79	8.24724e-77	8.60974	13.0596	16640	312149	250.47	4825.17	424.408	7687.92
553201	NM_001309524,XM_001923455	nova2	neuro-oncological ventral antigen 2	protein_coding	NP_001296453.1;XP_001923490.1	ZDB-GENE-080211-1	2.01678	6.22282	1.44218e-06	9.17801e-06	6.65504	5.65743	4261	1809	7.32103	3.25779	12.4051	5.19062
553212	XM_021471381,XM_678306	st8sia6	ST8 alpha-N-acetyl-neuraminide alpha-2,8-sialyltransferase 6	protein_coding	XP_021327056.1	ZDB-GENE-060322-9	2.00621	6.16171	1.75209e-06	1.09482e-05	6.592	5.60245	4077	1740	12.331	5.41064	20.8943	8.62074
553214	NM_001099237,NM_001099237_dup1,XM_005161956,XM_005161957	eif4ba	eukaryotic translation initiation factor 4Ba	protein_coding	NP_001092707.2	ZDB-GENE-060629-1	-2.15429	5.55844	1.82765e-07	1.40245e-06	4.94749	6.02951	1275	2352	7.33884	14.0015	6.24423	13.5636
553216	NM_001037371	pm20d1.1	peptidase M20 domain containing 1, tandem duplicate 1	protein_coding	NP_001032448.1	ZDB-GENE-051120-102	6.35858	-1.43056	0.00106861	0.00357388	0.621602	0.113759	23	3	0.214136	0.019782	0.362842	0.031519
553218	NM_001025472,XM_005157631,XM_005157632,XM_005157633	lsr	lipolysis stimulated lipoprotein receptor	protein_coding	NP_001020643.1;XP_005157688.1;XP_005157689.1;XP_005157690.1	ZDB-GENE-050913-73	-3.39933	4.73956	1.74651e-15	3.97127e-14	3.71478	5.40056	518	1508	3.07681	9.16706	5.21349	14.6058
553226	XM_686856	tmem198a	transmembrane protein 198a	protein_coding	XP_691948.4	ZDB-GENE-070912-716	4.53515	0.798973	4.52997e-09	4.52846e-08	1.90294	0.679564	117	22	0.650513	0.124796	1.10226	0.198837
553232	NM_001044319,NM_001044319_dup1	znf296	zinc finger protein 296	protein_coding	NP_001037784.1	ZDB-GENE-050419-201	-3.56372	5.08816	7.89212e-17	2.03425e-15	3.99032	5.75709	636	1941	2.7496	8.61951	4.65905	13.7334
553238	NM_001123233	esyt3	extended synaptotagmin-like protein 3	protein_coding	NP_001116705.1	ZDB-GENE-050809-35	-4.81127	5.22176	3.08376e-24	1.60945e-22	3.78997	5.97158	548	2258	2.79885	11.8484	4.74251	18.8779
553253	NM_001159921,NM_001159921_dup1	tmem55bb	transmembrane protein 55Bb	protein_coding	NP_001153393.1	ZDB-GENE-121214-195	-2.27993	-0.052178	0.00564883	0.0155188	0.643394	1.19242	24	47	0.300535	0.608144	0.509241	0.968953
553257	NM_001128682	klhl40a	kelch-like family member 40a	protein_coding	NP_001122154.1	ZDB-GENE-050916-1	2.68552	-0.478025	0.00377845	0.0108717	0.970915	0.438851	41	13	0.317127	0.10215	0.537354	0.162754
553273	NM_001080987	cyr61l2	cysteine-rich, angiogenic inducer, 61 like 2	protein_coding	NP_001074456.2	ZDB-GENE-060404-5	2.18888	1.77502	6.13306e-05	0.000278161	2.48879	1.63496	197	77	0.717795	0.28854	1.21627	0.45973
553283	NM_001328356	pcxa	pyruvate carboxylase a	protein_coding	NP_001315285.1	ZDB-GENE-090908-3	-4.09397	5.31732	2.73209e-20	1.01527e-18	4.05678	6.02346	668	2342	2.53829	9.14927	4.30099	14.5775
553303	NM_001199990,XM_005160571,XM_005160572,XM_005160573,XM_009300714	cep135	centrosomal protein 135	protein_coding	NP_001186919.1;XP_005160628.1;XP_005160629.1;XP_005160630.1;XP_009298989.1	ZDB-GENE-041210-325	4.04614	4.47876	7.54213e-19	2.4182e-17	5.19535	3.29367	1522	322	4.88146	1.05163	8.27137	1.67555
553305	XM_679071	ipo4	importin 4	protein_coding	XP_684163.4	ZDB-GENE-041014-307	-2.10655	4.59416	8.04224e-07	5.40423e-06	4.0466	5.07503	663	1196	2.61536	4.84997	4.4316	7.72744
553310	XM_009297958,XM_017354204,XM_021470668,XM_021473836,XM_021473837	elmo3	engulfment and cell motility 3, transcript variant X1	protein_coding	XP_009296233.1;XP_017209693.1;XP_021326343.1	ZDB-GENE-050309-39	-8.30173	3.49185	8.47321e-33	7.51971e-31	1.77058	4.39548	103	733	0.737569	4.04467	1.24977	6.44435
553311	XM_021472960,XM_691174	p3h3	prolyl 3-hydroxylase 3	protein_coding	XP_021328635.1	ZDB-GENE-060503-231	-9.81013	4.34228	4.77762e-41	6.69917e-39	2.24691	5.23967	160	1345	0.867196	7.3521	1.46942	11.7141
553318	NM_001256242	gtf3c3	general transcription factor IIIC, polypeptide 3	protein_coding	NP_001243171.1	ZDB-GENE-040914-80	10.6532	5.99631	1.41231e-48	2.85627e-46	6.87735	3.57763	4978	400	26.2952	2.16679	44.5558	3.45234
553333	NM_001089364	jph2	junctophilin 2	protein_coding	NP_001082833.1	ZDB-GENE-030131-9848	2.66384	1.15153	9.48657e-06	5.10832e-05	2.04887	1.12165	134	43	0.665822	0.21607	1.1282	0.344263
553336	NM_001171028	plppr3a	phospholipid phosphatase related 3a	protein_coding	NP_001164499.1	ZDB-GENE-070912-555	3.36042	1.43036	2.27562e-08	2.01275e-07	2.33659	1.13967	173	44	1.0517	0.272651	1.78205	0.434413
553337	XM_005162121,XM_021473631,XM_021473632,XM_687746	lamb2l	laminin, beta 2-like, transcript variant X2	protein_coding	XP_005162178.1;XP_692838.6	ZDB-GENE-030131-4205	2.16558	2.70382	7.13006e-06	3.96108e-05	3.29691	2.34337	377	149	1.02402	0.424615	1.73515	0.676538
553341	NM_001128231,NM_001128231_dup1,XM_009304611,XM_009304620,XM_009304622,XM_021478650,XM_021478651,XM_021478652,XM_021478653,XM_021478654,XM_021478655,XM_021478656,XM_021478657,XM_021478658,XM_021478659,XM_021478660	lmo7a	LIM domain 7a	protein_coding	NP_001121703.1;XP_009302886.1;XP_009302895.1;XP_009302897.1;XP_021334325.1;XP_021334326.1;XP_021334327.1;XP_021334328.1;XP_021334329.1;XP_021334330.1;XP_021334331.1;XP_021334332.1;XP_021334333.1;XP_021334334.1;XP_021334335.1	ZDB-GENE-030219-74	-4.97473	8.3978	5.35762e-27	3.36379e-25	6.83152	9.13601	4821	20536	11.7449	50.0256	11.2243	40.6618
553348	XM_681113	igsf9b	immunoglobulin superfamily, member 9b	protein_coding	XP_686205.6	ZDB-GENE-060810-28	2.35144	4.12405	3.62079e-08	3.10588e-07	4.66543	3.50651	1041	379	2.01729	0.752947	3.4182	1.19967
553349	NM_001077536	znf185	zinc finger protein 185 with LIM domain	protein_coding	NP_001071004.1	ZDB-GENE-061103-355	-5.32773	6.30527	2.24922e-28	1.51628e-26	4.69964	7.06749	1067	4868	4.58873	21.5068	7.77535	34.2667
553353	XM_017351848	si:ch211-202f3.3	si:ch211-202f3.3	protein_coding	XP_017207337.2	ZDB-GENE-080917-19	-3.72709	5.86023	1.37609e-18	4.30063e-17	4.67605	6.53233	1049	3348	6.06964	19.9057	10.2847	31.7157
553354	XM_688921	col4a3	collagen, type IV, alpha 3	protein_coding	XP_694013.8	ZDB-GENE-070802-4	-4.72885	1.12581	3.51858e-11	4.73186e-10	0.806805	2.18753	32	130	0.084175	0.354624	0.142631	0.56502
553355	XM_017357758,XM_021478837,XM_021478838,XM_021478839,XM_021478840	col4a2	collagen, type IV, alpha 2, transcript variant X1	protein_coding	XP_017213247.1;XP_021334512.1;XP_021334513.1;XP_021334514.1;XP_021334515.1	ZDB-GENE-070725-3	6.10111	3.91065	5.67075e-27	3.54979e-25	4.73939	2.38172	1098	154	2.13465	0.304088	3.61705	0.484502
553364	NM_001098731,NM_001098731_dup1,XM_009302276,XM_021476873	iqca1	IQ motif containing with AAA domain 1	protein_coding	NP_001092201.2;XP_009300551.1;XP_021332548.1	ZDB-GENE-050208-768	5.27301	-0.243531	1.62683e-06	1.02357e-05	1.20872	0.317457	56	9	0.279882	0.046579	0.328131	0.074215
553367	NM_001037373,NM_001037373_dup1	gpc1a	glypican 1a	protein_coding	NP_001032450.1	ZDB-GENE-051120-147	-2.70758	2.88215	4.55633e-09	4.55048e-08	2.30959	3.55095	169	392	0.808668	1.92355	0.494244	2.07572
553370	XM_002667778	fibina	fin bud initiation factor a	protein_coding	XP_002667824.1	ZDB-GENE-111031-2	4.09977	1.33079	3.24652e-10	3.81901e-09	2.30276	0.968776	168	35	2.64608	0.563283	4.48364	0.897476
553374	XM_003199114,XM_017357512	rab11fip1a	RAB11 family interacting protein 1 (class I) a, transcript variant X2	protein_coding	XP_003199162.3;XP_017213001.1	ZDB-GENE-051113-116	-3.93773	3.86802	2.46266e-17	6.69214e-16	2.7868	4.59966	252	850	1.00162	4.01284	1.69719	6.39365
553392	XM_017354216,XM_021470755,XM_021470756	ano3	anoctamin 3, transcript variant X2	protein_coding	XP_017209705.1;XP_021326430.1;XP_021326431.1	ZDB-GENE-111031-3	3.39431	-0.723646	0.00125538	0.00413151	0.882056	0.317457	36	9	0.092274	0.022558	0.156354	0.035942
553399	XR_661775,XR_661776	secisbp2	SECIS binding protein 2, transcript variant X2	misc_RNA	.	ZDB-GENE-050208-263	3.95166	4.37359	3.4175e-18	1.01958e-16	5.08622	3.2236	1408	305	9.07848	2.01088	15.383	3.20392
553413	NM_001327973,NM_001327973_dup1	rhoh	ras homolog family member H	protein_coding	NP_001314902.1	ZDB-GENE-060228-7	10.5925	0.743853	1.99861e-15	4.52009e-14	1.97346	0.348776	125	10	0.710582	0.053833	0.314911	0.085772
553415	NM_001099974,XM_005165312,XM_005165313	rhobtb2a	Rho-related BTB domain containing 2a	protein_coding	NP_001093444.1;XP_005165369.1;XP_005165370.1	ZDB-GENE-060315-11	-2.34747	6.12679	5.42413e-09	5.3336e-08	5.41713	6.62878	1782	3582	3.04785	6.43115	5.16441	10.2467
553420	NM_001020520	mipb	major intrinsic protein of lens fiber b	protein_coding	NP_001018356.1	ZDB-GENE-050706-86	-35.9091	8.55472	2.38359e-97	2.38733e-94	4.41768	9.51702	870	26754	6.31469	199.506	10.6999	317.872
553421	XM_021478817	si:ch73-167c12.2	si:ch73-167c12.2	protein_coding	XP_021334492.1	ZDB-GENE-100922-268	-2.28843	1.05722	0.000150657	0.000625128	1.1642	1.94268	53	104	0.552057	1.10813	0.935431	1.76558
553427	NM_001045255,NM_001199683,XM_005171993,XM_005171994,XM_017356085	pou2f3	POU class 2 homeobox 3	protein_coding	NP_001038720.2;NP_001186612.1;XP_005172050.1;XP_005172051.1;XP_017211574.1	ZDB-GENE-060512-299	-2.88024	0.74383	1.44345e-05	7.50755e-05	0.882056	1.77988	36	89	0.208369	0.594047	0.35307	0.946493
553434	NM_001256251,NM_001256251_dup1,NM_001256251_dup2,XM_021481022	msnb	moesin b	protein_coding	NP_001243180.1	ZDB-GENE-030717-7	-2.91549	3.19507	1.24844e-10	1.55375e-09	2.50078	3.8671	199	497	1.4925	3.82275	1.63652	4.16568
553443	NM_001083819,XM_021480577,XM_021480578	vstm4a	V-set and transmembrane domain containing 4a	protein_coding	NP_001077288.1;XP_021336252.1;XP_021336253.1	ZDB-GENE-060810-69	2.59276	0.526964	0.000233414	0.00092074	1.58035	0.820276	85	28	0.91095	0.294716	1.54356	0.46957
553448	NM_001145555,XM_005156963,XM_005156964	rrbp1a	ribosome binding protein 1a	protein_coding	NP_001139027.1;XP_005157020.1;XP_005157021.1	ZDB-GENE-030131-9795	-2.41135	6.64284	1.50508e-09	1.61348e-08	5.89639	7.15203	2501	5164	8.34552	17.6043	14.141	28.0488
553453	NM_001159933,XM_009296551	samhd1	SAM domain and HD domain 1	protein_coding	NP_001153405.1;XP_009294826.1	ZDB-GENE-090313-386	-4.84375	5.94347	3.83508e-25	2.11715e-23	4.46281	6.68623	899	3729	4.49154	19.1672	7.61067	30.5391
553465	NM_001126383,XM_005167449,XM_005167450	sik1	salt-inducible kinase 1	protein_coding	NP_001119855.1;XP_005167506.1;XP_005167507.1	ZDB-GENE-030131-9446	-2.17267	6.88147	8.51089e-08	6.89825e-07	6.2346	7.34372	3173	5903	9.56234	18.4487	16.2029	29.3942
553473	XM_005169625	crybb1l1	crystallin, beta B1, like 1	protein_coding	XP_005169682.1	ZDB-GENE-100112-3	-12.8982	6.10577	2.14816e-55	5.71927e-53	3.44695	7.00896	423	4673	5.84689	66.4716	9.90726	105.909
553474	NM_001033722,NM_001033722_dup1	crybgx	crystallin beta gamma X	protein_coding	NP_001028894.1	ZDB-GENE-070410-2	-147.427	9.51201	2.79162e-154	2.9358e-150	3.43763	10.5032	420	53035	8.87704	1152.43	15.0417	1006.46
553485	XM_021466397,XM_688527	rnaset2l	ribonuclease T2, like	protein_coding	XP_021322072.1	ZDB-GENE-090819-2	2.28098	1.53192	5.84271e-05	0.000266399	2.30276	1.44516	168	63	2.22917	0.84765	3.77721	1.35056
553503	XM_001341241,XM_005169337	fbln2	fibulin 2, transcript variant X1	protein_coding	XP_001341277.2;XP_005169394.1	ZDB-GENE-060711-1	3.72864	2.00676	2.00523e-11	2.78206e-10	2.85376	1.41588	266	61	0.753997	0.175713	1.27761	0.279963
553508	NM_001044325,NM_001044325_dup1	ugt8	UDP glycosyltransferase 8	protein_coding	NP_001037790.1	ZDB-GENE-060616-129	-8.55391	3.42912	4.97972e-33	4.53414e-31	1.69955	4.34006	96	704	0.275876	2.08485	0.317409	0.727433
553509	XM_003201642,XM_009303033	LOC553509	gastrula zinc finger protein XlCGF52.1, transcript variant X1	protein_coding	XP_003201690.2;XP_009301308.1	.	3.33123	-0.364642	0.000305231	0.00117088	1.07079	0.409446	47	12	0.507119	0.122519	0.859287	0.19521
553511	NM_001025301	tmeff1b	transmembrane protein with EGF-like and two follistatin-like domains 1b	protein_coding	NP_001020472.1	ZDB-GENE-050706-143	2.1048	5.23902	5.12127e-07	3.59172e-06	5.70372	4.66021	2183	888	15.8096	6.60548	26.7886	10.5245
553513	NM_001025475,XM_005162508	idi1	isopentenyl-diphosphate delta isomerase 1	protein_coding	NP_001020646.1;XP_005162565.1	ZDB-GENE-050913-44	-3.12933	4.52351	1.3793e-13	2.4838e-12	3.59966	5.16245	475	1273	2.23621	6.13024	3.78914	9.76728
553516	NM_001079703,NM_001079703_dup1	tdp2b	tyrosyl-DNA phosphodiesterase 2b	protein_coding	NP_001073171.1	ZDB-GENE-050816-1	-2.10566	1.75935	0.000102395	0.000440515	1.65733	2.46983	92	166	0.998964	1.83979	1.69269	0.173017
553523	NM_001044774,NM_001044774_dup1,XM_021468060,XM_021468061,XM_021468062,XM_021468063,XM_021468064,XR_002456105	trit1	tRNA isopentenyltransferase 1	protein_coding	NP_001038239.1;XP_021323735.1;XP_021323736.1;XP_021323737.1;XP_021323738.1;XP_021323739.1	ZDB-GENE-060503-297	-2.0018	4.00277	7.13411e-06	3.96229e-05	3.54282	4.481	455	780	3.20866	5.81314	3.78194	2.53631
553524	XM_001342847,XM_021467740	b4galnt3b	beta-1,4-N-acetyl-galactosaminyl transferase 3b, transcript variant X1	protein_coding	XP_001342883.4;XP_021323415.1	ZDB-GENE-030131-8615	-2.04808	3.10509	1.25025e-05	6.5807e-05	2.72683	3.64541	240	421	0.720762	1.29984	1.22129	2.07102
553526	NM_001320211,XM_017359014	zgc:152774	zgc:152774	protein_coding	NP_001307140.1;XP_017214503.1	ZDB-GENE-060929-544	-2.08862	2.05744	6.83634e-05	0.000306325	1.87558	2.71787	114	204	0.497771	0.897945	0.843447	1.43069
553543	NM_001020522,XM_009294543	cyp46a1.1	cytochrome P450, family 46, subfamily A, polypeptide 1, tandem duplicate 1	protein_coding	NP_001018358.1;XP_009292818.1	ZDB-GENE-050522-464	2.99878	2.51183	1.22008e-09	1.32895e-08	3.24083	1.93238	361	103	2.58432	0.739914	4.37899	1.1789
553545	NM_001020524	tmem127	transmembrane protein 127	protein_coding	NP_001018360.1	ZDB-GENE-050522-97	-4.6645	2.22526	8.64097e-16	2.03068e-14	1.40008	3.11394	70	280	0.698254	2.87123	1.18315	4.57471
553547	NM_001020526	pgpep1	pyroglutamyl-peptidase I	protein_coding	NP_001018362.1	ZDB-GENE-050522-88	-3.89293	-0.246189	1.8943e-05	9.60298e-05	0.409074	1.19242	14	47	0.114568	0.393467	0.19413	0.626909
553573	NM_001020552	zgc:110006	zgc:110006	protein_coding	NP_001018388.1	ZDB-GENE-050522-119	-2.81764	0.511461	4.7982e-05	0.000222439	0.787362	1.60933	31	75	0.471685	1.17401	0.799245	1.87054
553586	NM_001020564,XM_005160691	paplnb	papilin b, proteoglycan-like sulfated glycoprotein	protein_coding	NP_001018400.1;XP_005160748.1	ZDB-GENE-030131-6023	3.89619	1.14783	5.8956e-09	5.75951e-08	2.14366	0.906995	146	32	1.14934	0.223682	1.94749	0.356392
553593	NM_001020570,NM_001020570_dup1	ccdc3b	coiled-coil domain containing 3b	protein_coding	NP_001018406.1	ZDB-GENE-050522-184	-2.32637	-0.352027	0.00694453	0.0185431	0.530986	1.02802	19	38	0.109701	0.229669	0.185883	0.36593
553596	NM_001020573	grapa	GRB2-related adaptor protein a	protein_coding	NP_001018409.1	ZDB-GENE-050522-347	2.51069	1.60567	6.28387e-06	3.53581e-05	2.39556	1.43059	182	62	1.976	0.69321	3.34822	1.10449
553600	NM_001020576,XM_005166692,XM_005166693,XM_005166694,XM_005166695,XM_017357334,XM_021478258,XM_021478259	asb6	ankyrin repeat and SOCS box containing 6	protein_coding	NP_001018412.1;XP_005166749.1;XP_005166750.1;XP_005166751.1;XP_005166752.1;XP_017212823.1;XP_021333933.1;XP_021333934.1	ZDB-GENE-050522-338	-2.54543	0.693814	0.00013009	0.000548552	0.918259	1.70924	38	83	0.383387	0.87295	0.64963	1.39087
553602	NM_001020578,XM_005169640	alox5b.3	arachidonate 5-lipoxygenase b, tandem duplicate 3	protein_coding	NP_001018414.1;XP_005169697.1	ZDB-GENE-050522-330	-5.54706	2.43259	1.87422e-19	6.3479e-18	1.40008	3.33727	70	333	0.42201	2.06423	0.715074	3.28893
553612	NM_001020586	mpeg1.2	macrophage expressed 1, tandem duplicate 2	protein_coding	NP_001018422.1	ZDB-GENE-050522-305	-2.21065	4.05122	2.99274e-07	2.20555e-06	3.49868	4.57173	440	833	2.57925	5.01822	4.3704	7.99551
553614	NM_001020588	itih3a	inter-alpha-trypsin inhibitor heavy chain 3a	protein_coding	NP_001018424.1	ZDB-GENE-050522-262	-3.23193	-0.442249	0.000591283	0.00211181	0.409074	1.04724	14	39	0.070982	0.209168	0.120276	0.333266
553617	NM_001020591	syngr3a	synaptogyrin 3a	protein_coding	NP_001018427.1	ZDB-GENE-050522-541	2.70317	3.32122	1.53879e-09	1.64877e-08	3.95372	2.66907	619	196	3.39945	1.10359	5.76019	1.75834
553625	NM_001020599	trmu	tRNA 5-methylaminomethyl-2-thiouridylate methyltransferase	protein_coding	NP_001018435.1	ZDB-GENE-050522-540	-2.43313	1.24536	3.18217e-05	0.000154047	1.23767	2.10739	58	121	0.484296	1.04722	0.820615	1.66853
553629	NM_001020602	pip5k1aa	phosphatidylinositol-4-phosphate 5-kinase, type I, alpha, a	protein_coding	NP_001018438.1	ZDB-GENE-050522-517	-2.39755	2.89464	2.06785e-07	1.57538e-06	2.42102	3.51689	186	382	0.987753	2.08672	1.6737	3.32476
553634	NM_001020607,XM_005156332,XM_021480111	casp7	caspase 7, apoptosis-related cysteine peptidase	protein_coding	NP_001018443.1;XP_005156389.1;XP_021335786.1	ZDB-GENE-050522-506	-2.52312	3.84714	4.30641e-09	4.31729e-08	3.19361	4.43067	348	752	1.99684	4.5009	3.38354	7.17126
553637	NM_001020610	cyp1c1	cytochrome P450, family 1, subfamily C, polypeptide 1	protein_coding	NP_001018446.2	ZDB-GENE-050522-501	3.39736	1.3431	2.07227e-08	1.8453e-07	2.26811	1.08493	163	41	0.818192	0.210034	1.38638	0.334647
553639	NM_001020612,NM_001020612_dup1	gmpr	guanosine monophosphate reductase	protein_coding	NP_001018448.1	ZDB-GENE-050522-48	2.95802	2.52457	1.66923e-09	1.77947e-08	3.24796	1.95291	363	105	1.9622	0.583414	3.32484	0.92955
553644	NM_001024949	barx1	BARX homeobox 1	protein_coding	NP_001020120.1	ZDB-GENE-050522-28	-2.10034	1.55799	0.000187505	0.000758712	1.52272	2.30396	80	144	0.862742	1.59507	1.46187	2.54142
553650	NM_001020623,NM_001020623_dup1,XM_009296734	fam58a	family with sequence similarity 58, member A	protein_coding	NP_001018459.1;XP_009295009.1	ZDB-GENE-050522-495	2.63219	2.40162	9.31302e-08	7.49926e-07	3.09821	1.95291	323	105	2.21497	0.746018	1.92013	1.18863
553653	NM_001020626,NM_001020626_dup1	amacr	alpha-methylacyl-CoA racemase	protein_coding	NP_001018462.1	ZDB-GENE-050522-484	-2.24306	0.0946116	0.00433438	0.0122599	0.706862	1.27626	27	52	0.278884	0.550566	0.451266	0.80807
553655	NM_001020628	pygma	phosphorylase, glycogen, muscle A	protein_coding	NP_001018464.1	ZDB-GENE-050522-482	3.12489	2.10498	2.0867e-09	2.18679e-08	2.89067	1.60933	274	75	1.55376	0.435209	2.63277	0.693417
553657	NM_001020630,XM_021480399	rab12	RAB12, member RAS oncogene family	protein_coding	NP_001018466.1;XP_021336074.1	ZDB-GENE-050522-555	-4.38385	0.946804	7.90025e-10	8.83861e-09	0.767654	2.03222	30	113	0.36871	1.4192	0.624759	2.2612
553658	NM_001020631,XM_005168390,XM_021474893	wbp1lb	WW domain binding protein 1-like b	protein_coding	NP_001018467.1;XP_005168447.1;XP_021330568.1	ZDB-GENE-050522-112	-4.73561	3.21714	1.53368e-19	5.24519e-18	2.08117	4.02812	138	560	0.683998	3.51568	1.159	5.60151
553670	NM_001020643	klf7a	Kruppel-like factor 7a	protein_coding	NP_001018479.1	ZDB-GENE-050522-276	-7.56398	0.193335	1.49193e-10	1.84154e-09	0.330654	1.57	11	72	0.053354	0.385467	0.090406	0.614163
553676	NM_001020649,XM_005171582	mgat3a	mannosyl (beta-1,4-)-glycoprotein beta-1,4-N-acetylglucosaminyltransferase a	protein_coding	NP_001018485.1;XP_005171639.1	ZDB-GENE-050522-249	-4.45108	0.2482	1.47168e-07	1.14814e-06	0.507414	1.52958	18	69	0.06763	0.273122	0.114595	0.435164
553677	NM_001020650,NM_001020650_dup1,XM_009305935	twf2b	twinfilin actin-binding protein 2b	protein_coding	NP_001018486.1;XP_009304210.1	ZDB-GENE-050522-238	2.29013	1.51331	5.98899e-05	0.000272478	2.289	1.43059	166	62	1.41643	0.523032	0.851875	0.349724
553686	NM_001020661	tefb	thyrotrophic embryonic factor b	protein_coding	NP_001018497.1	ZDB-GENE-050522-224	-4.43207	3.65092	2.39162e-19	7.98461e-18	2.48879	4.42333	197	748	1.48288	5.78756	2.51266	9.22129
553688	NM_001020663	bach1b	BTB and CNC homology 1, basic leucine zipper transcription factor 1 b	protein_coding	NP_001018499.1	ZDB-GENE-050522-220	-2.4064	1.69129	8.22544e-06	4.50888e-05	1.52272	2.46269	80	165	1.08877	2.30759	1.84486	3.67667
553697	NM_001020671	ubald1b	UBA-like domain containing 1b	protein_coding	NP_001018507.2	ZDB-GENE-050522-446	-3.53919	2.25239	1.18751e-11	1.68877e-10	1.62484	3.06763	89	270	0.783297	2.45211	1.32726	3.90693
553710	NM_001020681,NM_001020681_dup1	crygm2d1	crystallin, gamma M2d1	protein_coding	NP_001018517.2	ZDB-GENE-050522-395	2.04338	3.44976	8.39511e-06	4.58992e-05	3.96242	3.02464	623	261	15.3251	6.58053	25.9676	10.4847
553712	NM_001020683,NM_001020683_dup1,XM_021470176,XR_002456608	zgc:112332	zgc:112332	protein_coding	NP_001018519.1	ZDB-GENE-050522-387	14.5253	6.34721	1.25576e-59	3.94214e-57	7.25913	3.52033	6499	383	82.4532	5.12533	139.713	8.16616
553718	NM_001111214	nefma	neurofilament, medium polypeptide a	protein_coding	NP_001104684.2	ZDB-GENE-050522-205	2.63258	2.98508	1.08919e-08	1.01725e-07	3.63	2.41169	486	158	2.37317	0.789028	4.02122	1.25716
553726	NM_001020697	trim35-7	tripartite motif containing 35-7	protein_coding	NP_001018533.1	ZDB-GENE-050522-333	-7.98701	-0.805155	9.43926e-07	6.24327e-06	0.159737	0.968776	5	35	0.045987	0.344205	0.077923	0.54842
553729	NM_001020700,XM_005167337,XM_005167338,XM_005167339,XM_005167340,XM_021478260	dbnlb	drebrin-like b	protein_coding	NP_001018536.2;XP_005167394.1;XP_005167395.1;XP_005167396.1;XP_005167397.1;XP_021333935.1	ZDB-GENE-050522-293	-2.16792	6.0698	1.16494e-07	9.21478e-07	5.4391	6.53744	1810	3360	4.61196	8.94144	7.81472	14.2464
553730	NM_001020701,XM_021480580,XM_021480581	c13h10orf11	c13h10orf11 homolog (H. sapiens)	protein_coding	NP_001018537.1;XP_021336255.1;XP_021336256.1	ZDB-GENE-050522-285	-10.1151	0.279552	8.47353e-13	1.38265e-11	0.275901	1.66015	9	79	0.02242	0.214712	0.03799	0.342099
553734	NM_001020705,XM_005156845	scdb	stearoyl-CoA desaturase b	protein_coding	NP_001018541.1;XP_005156902.1	ZDB-GENE-050522-12	3.50737	3.14191	1.82228e-13	3.22898e-12	3.87071	2.28789	582	142	4.69446	1.13861	7.95452	1.81414
553749	NM_001020720,XM_021481412	zgc:113279	zgc:113279	protein_coding	NP_001018556.1;XP_021337087.1	ZDB-GENE-050522-529	-8.68724	2.64892	1.44857e-28	9.92434e-27	1.19403	3.61031	55	410	0.341219	2.64112	0.578178	4.20808
553753	NM_001020724	zgc:113307	zgc:113307	protein_coding	NP_001018560.1	ZDB-GENE-050522-29	2.36969	-0.165626	0.00525818	0.0145482	1.11825	0.577503	50	18	0.499057	0.179057	0.845625	0.28529
553756	NM_001020725,XM_005159843	crmp1	collapsin response mediator protein 1	protein_coding	NP_001018561.1;XP_005159900.1	ZDB-GENE-050720-1	2.74274	3.18234	1.60392e-09	1.71506e-08	3.82853	2.53934	564	176	3.35678	1.10688	5.68788	1.76358
553761	NM_001020727,XM_005162073,XM_005162074	arhgef3l	Rho guanine nucleotide exchange factor (GEF) 3, like	protein_coding	NP_001018563.1;XP_005162130.1;XP_005162131.1	ZDB-GENE-050522-85	2.37721	3.23206	1.37646e-07	1.07986e-06	3.82138	2.70582	561	202	2.92271	1.0793	4.95237	1.71965
553763	NM_001020729,NM_001020729_dup1,XM_017358228	ctbs	chitobiase, di-N-acetyl-	protein_coding	NP_001018565.1	ZDB-GENE-050522-422	-2.89924	0.933858	3.93873e-06	2.30761e-05	0.970915	1.92201	41	102	0.400116	1.02743	0.226445	0.781222
553764	NM_001020730,XM_009299101	zgc:109949	zgc:109949	protein_coding	NP_001018566.2;XP_009297376.1	ZDB-GENE-050522-166	4.34266	3.56573	1.85229e-18	5.69579e-17	4.33138	2.43377	817	161	7.89324	1.59155	13.3747	2.53581
553776	NM_001020741	calcoco2	calcium binding and coiled-coil domain 2	protein_coding	NP_001018577.2	ZDB-GENE-050522-346	-3.00907	4.14435	1.83245e-12	2.86984e-11	3.29347	4.78137	376	969	2.87162	7.61016	4.8658	12.1252
553788	NM_001020750,XM_009294663,XM_009294664	map3k7	mitogen-activated protein kinase kinase kinase 7	protein_coding	NP_001018586.1;XP_009292938.1;XP_009292939.1	ZDB-GENE-041001-135	-2.00726	6.71182	1.4805e-06	9.39916e-06	6.14339	7.13837	2976	5115	11.0574	20.6828	18.7361	32.9537
553795	NM_001020757,NM_001020757_dup1	nanp	N-acetylneuraminic acid phosphatase	protein_coding	NP_001018593.1	ZDB-GENE-050522-94	-4.21363	0.853719	4.08742e-09	4.11343e-08	0.747673	1.95291	29	105	0.36992	1.40033	0.375814	2.23114
553800	NM_001020762,XM_005156020	cep55l	centrosomal protein 55 like	protein_coding	NP_001018598.1;XP_005156077.1	ZDB-GENE-050522-222	-2.12069	1.03612	0.000672277	0.00236178	1.19403	1.90103	55	100	0.3925	0.732311	0.665072	1.16679
553805	NM_001020767	mrpl41	mitochondrial ribosomal protein L41	protein_coding	NP_001018603.1	ZDB-GENE-050522-200	2.20633	3.54658	8.21078e-07	5.5122e-06	4.08692	3.04391	683	265	17.9503	7.15618	30.4159	11.4019
553806	NM_001020768	ubald2	UBA-like domain containing 2	protein_coding	NP_001018604.1	ZDB-GENE-050522-185	-3.34927	1.50441	6.546e-09	6.34479e-08	1.19403	2.41169	55	158	0.781454	2.32279	1.32413	3.70089
553816	NM_001018156	inhbab	inhibin, beta Ab	protein_coding	NP_001018166.1	ZDB-GENE-050525-2	3.08339	4.09148	9.50236e-13	1.53859e-11	4.73559	3.21937	1095	304	5.87956	1.67375	9.96261	2.66677
553940	NM_001020778,NM_001020778_dup1	pcdh1gb9	protocadherin 1 gamma b 9	protein_coding	NP_001018614.2	ZDB-GENE-041118-18	10.8514	-2.08318	0.00250381	0.00756866	0.409074	0.038925	14	1	0.075893	0.01949	0.128597	0.017261
553944	NM_001024207	ugcg	UDP-glucose ceramide glucosyltransferase	protein_coding	NP_001019378.1	ZDB-GENE-030131-9885	-3.43427	3.8338	1.44646e-14	2.96025e-13	2.89067	4.52622	274	806	1.44468	4.37163	2.44794	6.9653
553947	NM_001020780	uncx4.1	Unc4.1 homeobox (C. elegans)	protein_coding	NP_001018616.2	ZDB-GENE-050714-1	-2.88644	2.75922	9.19137e-10	1.01749e-08	2.15887	3.46066	148	366	1.21294	3.08356	2.05527	4.91303
553954	NM_001020783	crygm2b	crystallin, gamma M2b	protein_coding	NP_001018619.1	ZDB-GENE-050516-10	-64.3668	10.9463	7.80523e-124	1.82408e-120	5.93942	11.9244	2578	142091	68.0055	3850.3	115.232	6134.67
553955	NM_001023572,NM_001023572_dup1	zbtb24	zinc finger and BTB domain containing 24	protein_coding	NP_001018866.2	ZDB-GENE-081022-123	2.46984	1.13818	4.1081e-05	0.000193431	2.01584	1.15747	130	45	0.416106	0.14588	0.70507	0.232429
553967	NM_001020795,NM_001020795_dup1	crygm7	crystallin, gamma M7	protein_coding	NP_001018631.1	ZDB-GENE-050516-8	-65.9601	9.16687	3.48422e-122	7.32836e-119	4.18304	10.1464	733	41406	14.9458	867.732	25.3249	1382.55
553969	NM_001037438	cyp3a65	cytochrome P450, family 3, subfamily A, polypeptide 65	protein_coding	NP_001032515.1	ZDB-GENE-050604-1	4.78908	0.423043	3.17116e-08	2.74934e-07	1.63575	0.52363	90	16	0.690784	0.121017	1.1705	0.192816
553977	NM_001020802	grn1	granulin 1	protein_coding	NP_001018638.2	ZDB-GENE-060103-1	7.8459	4.33414	1.43663e-34	1.41863e-32	5.19535	2.46983	1522	166	15.337	1.71412	25.9878	2.7311
553978	NM_001020803	chrm5a	cholinergic receptor, muscarinic 5a	protein_coding	NP_001018639.1	ZDB-GENE-080723-32	6.51449	-0.331654	3.13151e-07	2.29256e-06	1.17919	0.252701	54	7	0.557512	0.073986	0.944675	0.117881
553997	NM_001024109,NM_001024109_dup1	pcdh1g9	protocadherin 1 gamma 9	protein_coding	NP_001019280.1	ZDB-GENE-050609-5	7.26947	5.60957	4.53296e-36	4.62824e-34	6.43804	3.6766	3660	431	23.0387	2.78212	1.60324	0.428897
554012	NM_001024124,NM_001024124_dup1	pcdh1g26	protocadherin 1 gamma 26	protein_coding	NP_001019295.1	ZDB-GENE-050609-21	2.64415	3.75747	1.05651e-09	1.16101e-08	4.35963	3.06763	834	270	2.9666	0.984493	0.955006	0.96244
554014	NM_001024126,NM_001024126_dup1	pcdh1g30	protocadherin 1 gamma 30	protein_coding	NP_001019297.1	ZDB-GENE-050609-23	7.14204	4.43882	1.42639e-32	1.24487e-30	5.28213	2.65661	1619	194	5.7762	0.708949	2.56494	0.711837
554015	NM_001024127,NM_001024127_dup1	pcdh1g31	protocadherin 1 gamma 31	protein_coding	NP_001019298.1	ZDB-GENE-050609-24	3.24752	3.93463	1.67531e-13	2.98617e-12	4.60147	3.02948	994	262	3.51814	0.951296	1.33187	1.5157
554050	NM_001024072	itgbl1	integrin, beta-like 1	protein_coding	NP_001019243.1	ZDB-GENE-050522-410	-2.55607	2.86423	3.40158e-08	2.937e-07	2.34326	3.51344	174	381	2.07142	4.68299	3.50991	7.46139
554053	NM_001024178	pcdh2g5	protocadherin 2 gamma 5	protein_coding	NP_001019349.1	ZDB-GENE-050610-27	6.12627	-1.93779	0.00572059	0.0156648	0.434294	0.0768272	15	2	0.056426	0.007549	0.09561	0.012029
554054	NM_001024179	pcdh2g6	protocadherin 2 gamma 6	protein_coding	NP_001019350.1	ZDB-GENE-050610-28	2.81919	-1.42098	0.0397031	0.081766	0.554179	0.2192	20	6	0.076619	0.023099	0.129826	0.036804
554056	NM_001024181	pcdh2g8	protocadherin 2 gamma 8	protein_coding	NP_001019352.1	ZDB-GENE-050610-30	5.31671	-2.07941	0.0160841	0.0380407	0.383405	0.0768272	13	2	0.048652	0.004347	0.082439	0.006927
554057	NM_001024182	pcdh2g9	protocadherin 2 gamma 9	protein_coding	NP_001019353.1	ZDB-GENE-050610-31	3.77005	-0.613634	0.000426762	0.00157946	0.953575	0.317457	40	9	0.156295	0.036262	0.264834	0.057776
554063	NM_001024188	pcdh2g16	protocadherin 2 gamma 16	protein_coding	NP_001019359.1	ZDB-GENE-050610-6	18.1583	1.8128	4.92818e-30	3.773e-28	2.90878	0.438851	278	13	1.12289	0.053919	1.90269	0.085908
554064	NM_001024189	pcdh2g17	protocadherin 2 gamma 17	protein_coding	NP_001019360.1	ZDB-GENE-050610-7	21.3086	2.89468	3.28111e-44	5.34973e-42	3.91169	0.728009	600	24	2.39235	0.095192	4.05372	0.15167
554076	NM_001024201	pcdh2g29	protocadherin 2 gamma 29	protein_coding	NP_001019372.1	ZDB-GENE-050610-20	-4.59923	1.37405	4.89168e-12	7.28659e-11	0.936025	2.38172	39	154	0.150229	0.616043	0.254556	0.981539
554089	NM_001024391	s100z	S100 calcium binding protein Z	protein_coding	NP_001019562.1	ZDB-GENE-050522-69	-2.73922	2.41521	1.79802e-08	1.6203e-07	1.93863	3.13206	121	284	1.68194	4.05378	2.84997	6.45886
554095	NM_001024651	fabp1b.1	fatty acid binding protein 1b, tandem duplicate 1	protein_coding	NP_001019822.1	ZDB-GENE-050522-96	3.63505	2.29026	6.4728e-12	9.50715e-11	3.09821	1.6222	323	76	10.6736	2.55782	18.0858	4.07537
554100	NM_001024402	ndufs8b	NADH dehydrogenase (ubiquinone) Fe-S protein 8b	protein_coding	NP_001019573.2	ZDB-GENE-050522-131	2.81646	5.16687	6.19398e-12	9.13591e-11	5.75279	4.30656	2260	687	35.0333	10.9293	59.3621	17.4136
554107	NM_001024408,XM_005171867,XM_021476165	ela3l	elastase 3 like	protein_coding	NP_001019579.1;XP_005171924.1;XP_021331840.1	ZDB-GENE-060710-2	8.79406	1.60181	3.45518e-20	1.27273e-18	2.65892	0.679564	227	22	3.62444	0.349303	6.14142	0.556543
554123	NM_001024418,XM_005160040	sept3	septin 3	protein_coding	NP_001019589.1;XP_005160097.1	ZDB-GENE-050522-375	2.1287	3.99052	1.18023e-06	7.63336e-06	4.49463	3.47492	920	370	6.39765	2.55315	10.8405	4.06793
554127	NM_001024422	tubb2	tubulin, beta 2A class IIa	protein_coding	NP_001019593.1	ZDB-GENE-050522-384	2.36378	4.22825	2.53198e-08	2.22825e-07	4.76819	3.59733	1121	406	10.8704	4.0429	18.4194	6.44153
554136	NM_001024430	spra	sepiapterin reductase a	protein_coding	NP_001019601.2	ZDB-GENE-050522-412	-2.17247	2.42972	9.83095e-06	5.2762e-05	2.12829	3.05819	144	268	0.847485	1.62049	1.43602	2.58191
554147	NM_001024440	spc24	SPC24, NDC80 kinetochore complex component, homolog (S. cerevisiae)	protein_coding	NP_001019611.1	ZDB-GENE-050522-456	-4.40369	5.775	1.71631e-22	7.68065e-21	4.40976	6.4952	865	3262	11.8159	45.7943	20.0214	72.9639
554150	NM_001024373	b9d1	B9 protein domain 1	protein_coding	NP_001019544.1	ZDB-GENE-050522-467	2.71213	2.73738	9.98066e-09	9.37157e-08	3.41246	2.18753	412	130	4.34257	1.40065	7.35825	2.23165
554151	NM_001024220	bcap29	B-cell receptor-associated protein 29	protein_coding	NP_001019391.1	ZDB-GENE-050522-468	-2.08195	2.01628	8.18511e-05	0.000360917	1.8477	2.68143	111	198	1.21188	2.21996	2.05347	3.53705
554168	NM_001024448,XM_021476875,XM_021476876	myh11a	myosin, heavy chain 11a, smooth muscle	protein_coding	NP_001019619.1;XP_021332550.1;XP_021332551.1	ZDB-GENE-050531-1	2.87652	3.17466	2.7686e-10	3.28068e-09	3.83801	2.49104	568	169	1.22936	0.392923	2.08309	0.626043
554169	NM_001040331	nrl	neural retina leucine zipper	protein_coding	NP_001035421.1	ZDB-GENE-050729-1	-8.09246	2.86238	1.44512e-28	9.92434e-27	1.37425	3.79787	68	472	0.704663	5.08703	1.19401	8.10514
554171	NM_001024451,NM_001024451_dup1,XM_005163057	rad52	RAD52 homolog, DNA repair protein	protein_coding	NP_001019622.1	ZDB-GENE-050731-10	-4.45178	1.14155	1.38687e-10	1.72196e-09	0.844921	2.18753	34	130	0.307985	1.46655	0.360913	0.558262
554176	NM_001024224,NM_001024224_dup1,NM_001024224_dup2,XM_005166221	cygb2	cytoglobin 2	protein_coding	NP_001019395.1;XP_005166278.1	ZDB-GENE-060920-1	2.10691	1.79199	0.000121051	0.000515085	2.48879	1.67258	197	80	1.58988	0.777662	1.50319	0.321182
554230	NM_001024653	kdr	kinase insert domain receptor (a type III receptor tyrosine kinase)	protein_coding	NP_001019824.2	ZDB-GENE-041001-112	2.77322	2.79336	3.9714e-09	4.00818e-08	3.47152	2.21328	431	133	1.23785	0.39303	2.09746	0.626214
554268	XM_009303444,XM_017357092,XM_017357093,XM_017357094,XM_021477956	col4a6	collagen, type IV, alpha 6, transcript variant X2	protein_coding	XP_009301719.1;XP_017212581.1;XP_017212582.1;XP_017212583.1;XP_021333631.1	ZDB-GENE-101001-2	-2.20163	4.34467	2.32198e-07	1.74985e-06	3.77277	4.85275	541	1020	0.9877	1.92039	1.67361	3.05975
554269	XM_688948	col4a1	collagen, type IV, alpha 1	protein_coding	XP_694040.5	ZDB-GENE-081105-114	2.21639	1.15005	0.000335453	0.00127842	1.99056	1.22654	127	49	0.374223	0.146528	0.634102	0.233462
554270	XM_009291835	col4a4	collagen, type IV, alpha 4	protein_coding	XP_009290110.1	ZDB-GENE-101001-1	-5.5002	0.569174	3.37333e-10	3.95492e-09	0.530986	1.79132	19	90	0.048778	0.245645	0.082652	0.391386
554361	NM_001025168,XM_021476166,XM_021476168	lmx1ba	LIM homeobox transcription factor 1, beta a	protein_coding	NP_001020339.1;XP_021331841.1;XP_021331843.1	ZDB-GENE-050114-3	-2.59258	3.22874	6.83817e-09	6.61579e-08	2.63192	3.85625	222	493	1.66178	3.71654	2.8158	5.92154
554386	NM_001161597	cldnd1b	claudin domain containing 1b	protein_coding	NP_001155069.1	ZDB-GENE-040808-4	-3.34038	1.42175	1.10257e-08	1.02885e-07	1.14904	2.34337	52	149	0.447861	1.31336	0.758877	2.09257
554458	NM_001003526,XM_005164130	zgc:100868	zgc:100868	protein_coding	NP_001003526.1;XP_005164187.1	ZDB-GENE-040801-33	3.9268	2.7684	2.38783e-14	4.72912e-13	3.55437	1.90103	459	100	1.86851	0.417049	3.16609	0.664482
554469	XR_223896	si:dkey-187j14.1	si:dkey-187j14.1	misc_RNA	.	ZDB-GENE-131122-28	-4.13441	4.88207	4.9054e-20	1.77888e-18	3.64087	5.59839	490	1735	3.87456	14.11	6.56523	22.4814
554477	NM_213397,XM_005164819,XM_005164820,XM_021475017	pfkfb3	6-phosphofructo-2-kinase/fructose-2,6-biphosphatase 3	protein_coding	NP_998562.1;XP_005164876.1;XP_005164877.1;XP_021330692.1	ZDB-GENE-040426-2724	2.35128	7.42823	3.54925e-09	3.60286e-08	7.92237	6.69692	10317	3757	49.9887	18.546	84.7033	29.5492
554488	NM_001003780,NM_001003780_dup1,XM_005165045	ypel1	yippee-like 1	protein_coding	NP_001003780.1	ZDB-GENE-040808-41	3.01593	6.17343	7.8482e-14	1.46723e-12	6.77218	5.20586	4625	1313	14.0343	5.1078	20.4156	4.91264
554561	NM_001044752	traf6	TNF receptor-associated factor 6	protein_coding	NP_001038217.1	ZDB-GENE-030131-5735	-2.71538	1.49672	1.00734e-06	6.60251e-06	1.32116	2.34337	64	149	0.564927	1.35932	0.957238	2.16579
554606	NM_001128329,XM_017357680,XM_017357681,XM_021478681,XM_021478682,XM_021478683,XM_021478684	lypd6b	LY6/PLAUR domain containing 6B	protein_coding	NP_001121801.1;XP_017213169.1;XP_017213170.1;XP_021334356.1;XP_021334357.1;XP_021334358.1;XP_021334359.1	ZDB-GENE-050522-38	39.3186	0.308559	8.00108e-18	2.3053e-16	1.70991	0.0768272	97	2	0.878403	0.010505	1.48841	0.016738
554678	NM_001013487,XM_009295979	si:rp71-1i20.2	si:rp71-1i20.2	protein_coding	NP_001013505.1;XP_009294254.1	ZDB-GENE-040724-207	-2.88779	3.59124	4.69917e-11	6.18508e-10	2.84438	4.23712	264	653	2.41748	6.20437	4.09629	9.8854
554842	NM_001099975,XM_005171174,XM_005171175	acot11a	acyl-CoA thioesterase 11a	protein_coding	NP_001093445.1;XP_005171231.1;XP_005171232.1	ZDB-GENE-050522-538	-4.42689	3.00694	1.48535e-17	4.16553e-16	1.98203	3.81479	126	478	0.845782	3.52143	1.43313	5.61068
554861	NM_001017542,XM_005169510,XM_021480582,XR_002459806	actr2b	ARP2 actin related protein 2b homolog	protein_coding	NP_001017542.1;XP_005169567.1;XP_021336257.1	ZDB-GENE-050410-4	-4.71998	2.06553	3.39542e-15	7.44691e-14	1.29386	2.97533	62	251	0.629039	2.64762	1.06587	4.21844
555192	NM_001039806,NM_001039806_dup1,NM_001039806_dup2	epas1b	endothelial PAS domain protein 1b	protein_coding	NP_001034895.2	ZDB-GENE-060607-11	2.04287	2.52724	4.75427e-05	0.000220694	3.11391	2.24692	327	137	1.58482	0.679188	1.46586	0.793448
555196	NM_001114407	ca4a	carbonic anhydrase IV a	protein_coding	NP_001107879.1	ZDB-GENE-080204-85	4.66707	-0.241458	5.80443e-06	3.2898e-05	1.19403	0.348776	55	10	0.319802	0.057525	0.541887	0.091654
555202	NM_001184954	col11a1b	collagen, type XI, alpha 1b	protein_coding	NP_001171883.1	ZDB-GENE-070912-607	2.15447	2.31687	1.92143e-05	9.73116e-05	2.94871	2.04183	287	114	0.596382	0.243401	1.01054	0.38781
555217	NM_212650,NM_212650_dup1	zbtb11	zinc finger and BTB domain containing 11	protein_coding	NP_997815.2	ZDB-GENE-030131-5055	2.3591	4.02114	3.92075e-08	3.34409e-07	4.56768	3.40959	970	352	4.01103	1.49332	6.65207	2.00215
555218	XM_017353039	oatx	organic anion transporter X	protein_coding	XP_017208528.1	ZDB-GENE-070115-1	-2.63794	-1.53578	0.0452806	0.0911724	0.218988	0.52363	7	16	0.028096	0.06902	0.047607	0.109969
555239	NM_001077597,XM_005168881	mtmr10	myotubularin related protein 10	protein_coding	NP_001071065.2;XP_005168938.1	ZDB-GENE-061103-52	-2.80015	5.07918	8.14376e-12	1.17804e-10	4.23061	5.666	759	1820	2.12857	5.25085	3.60675	8.36616
555242	NM_001030082,NM_001030082_dup1	foxp2	forkhead box P2	protein_coding	NP_001025253.1	ZDB-GENE-041203-2	2.42346	2.49524	6.55521e-07	4.48668e-06	3.15241	2.08896	337	119	1.97653	0.713863	3.34913	1.13739
555258	NM_001302254	si:dkey-175a17.4	si:dkey-175a17.4	protein_coding	NP_001289183.1	ZDB-GENE-130530-865	5.87552	0.268891	6.97918e-09	6.73363e-08	1.55757	0.409446	83	12	0.704222	0.097393	1.19327	0.155177
555274	NM_001034174,NM_001034174_dup1	gpr157	G protein-coupled receptor 157	protein_coding	NP_001029346.1	ZDB-GENE-050809-126	-2.73224	1.74784	2.97635e-07	2.19731e-06	1.47491	2.55286	76	178	0.627958	1.51317	1.06404	2.41092
555285	XM_005168926,XM_005168927,XM_677757	myo1ea	myosin IE, a, transcript variant X3	protein_coding	XP_005168983.1;XP_005168984.1;XP_682849.4	ZDB-GENE-030131-5127	-3.06049	5.96477	4.12315e-14	7.96348e-13	4.98851	6.57144	1313	3441	4.39445	11.8449	7.44617	18.8725
555300	XM_001922510	nol4la	nucleolar protein 4-like a	protein_coding	XP_001922545.4	ZDB-GENE-081105-118	8.00768	-1.17344	0.000103608	0.000445186	0.747673	0.113759	29	3	0.103435	0.01074	0.175265	0.017112
555303	XM_677774	si:dkeyp-118h9.7	si:dkeyp-118h9.7	protein_coding	XP_682866.7	ZDB-GENE-091204-477	-2.79306	7.74478	1.63913e-12	2.58246e-11	6.83389	8.30762	4829	11549	5.41389	13.2988	9.17355	21.1889
555340	XM_009293398,XM_009293399,XM_677830	iqsec3b	IQ motif and Sec7 domain 3b, transcript variant X1	protein_coding	XP_009291673.1;XP_009291674.1;XP_682922.4	ZDB-GENE-050420-210	2.67671	0.227787	0.000395595	0.00148079	1.38722	0.679564	69	22	0.221982	0.074167	0.376137	0.11817
555341	XM_009293473,XM_021473240,XM_677831	tspan9a	tetraspanin 9a, transcript variant X1	protein_coding	XP_009291748.1;XP_682923.2	ZDB-GENE-060503-632	-3.31041	1.51732	8.53766e-09	8.11077e-08	1.20872	2.41909	56	159	0.146584	0.440908	0.248377	0.702498
555344	NM_001128331,XM_005170035,XM_009294213	si:dkey-202e17.1	si:dkey-202e17.1	protein_coding	NP_001121803.1;XP_005170092.1;XP_009292488.1	ZDB-GENE-060503-810	6.44469	0.13159	4.03391e-09	4.06347e-08	1.47491	0.348776	76	10	1.11768	0.126394	1.89386	0.201382
555345	XM_001918606,XM_009296623,XM_009296626	ccdc13	coiled-coil domain containing 13, transcript variant X1	protein_coding	XP_001918641.4;XP_009294898.1;XP_009294901.1	ZDB-GENE-061207-11	2.11411	-0.0662874	0.0133673	0.0325222	1.14904	0.654718	52	21	0.197052	0.097419	0.333894	0.155218
555352	XM_677843	slc35f1	solute carrier family 35, member F1	protein_coding	XP_682935.5	ZDB-GENE-060503-463	3.33838	-0.255663	0.000299766	0.00115265	1.13373	0.438851	51	13	0.397801	0.097798	0.674053	0.155821
555375	XM_677868	nkx3-1	NK3 homeobox 1	protein_coding	XP_682960.4	ZDB-GENE-081104-238	-4.60121	4.79215	1.72574e-22	7.70647e-21	3.44385	5.53853	422	1663	7.69755	31.1534	13.0431	49.6365
555381	XM_021467765,XM_021473241	tmtc2b	transmembrane and tetratricopeptide repeat containing 2b, transcript variant X1	protein_coding	XP_021323440.1	ZDB-GENE-081031-100	-2.37226	2.62243	5.86242e-07	4.06542e-06	2.21088	3.26523	155	315	0.700764	1.46918	1.18741	2.34084
555390	XM_017353958,XM_677883	wu:fc01d11	wu:fc01d11, transcript variant X2	protein_coding	XP_017209447.2;XP_682975.3	ZDB-GENE-030131-2238	2.4303	2.93861	1.46839e-07	1.146e-06	3.55725	2.44105	460	162	0.99813	0.359365	1.69128	0.572575
555419	XM_677918	pcdh12	protocadherin 12	protein_coding	XP_683010.6	ZDB-GENE-140106-126	2.22753	0.107135	0.00433438	0.0122599	1.26604	0.70399	60	23	0.138969	0.054424	0.235475	0.086714
555422	XM_021479282	LOC555422	uncharacterized LOC555422	protein_coding	XP_021334957.1	.	2.8307	-0.906729	0.0100683	0.025554	0.767654	0.317457	30	9	0.152768	0.046756	0.258858	0.074495
555425	XM_009298943,XM_677924	armc6	armadillo repeat containing 6, transcript variant X2	protein_coding	XP_009297218.1;XP_683016.6	ZDB-GENE-100616-1	-3.16222	1.54195	2.61036e-08	2.29147e-07	1.25192	2.42645	59	160	0.267044	0.74717	0.452491	1.19046
555426	XM_021467953	ptprq	protein tyrosine phosphatase, receptor type, Q	protein_coding	XP_021323628.1	ZDB-GENE-050419-183	2.61342	-0.314469	0.00397843	0.0113879	1.05462	0.49592	46	15	0.062413	0.020652	0.105755	0.032905
555428	NM_001348047,XM_021468067	col28a1a	collagen, type XXVIII, alpha 1a	protein_coding	NP_001334976.1;XP_021323742.1	ZDB-GENE-070705-84	7.84681	4.85211	1.81604e-36	1.90984e-34	5.70308	2.90859	2182	238	6.42475	0.718962	10.8864	1.14552
555430	NM_001170647,NM_001170648,XM_021480468	tmie	transmembrane inner ear	protein_coding	NP_001164118.1;NP_001164119.1;XP_021336143.1	ZDB-GENE-061207-9	2.33531	-0.106789	0.00480939	0.0134498	1.14904	0.603703	52	19	1.16681	0.3237	1.97709	0.515749
555432	XM_005171403,XM_005171404,XM_677932	crema	cAMP responsive element modulator a, transcript variant X2	protein_coding	XP_005171460.1;XP_005171461.1;XP_683024.3	ZDB-GENE-030131-7031	-2.72437	3.86359	2.26964e-10	2.74038e-09	3.13713	4.47569	333	777	1.95118	5.12638	3.30618	8.16784
555437	XM_003200906	si:ch73-362m14.4	si:ch73-362m14.4	protein_coding	XP_003200954.1	ZDB-GENE-120215-30	3.44707	0.723577	9.33628e-07	6.18099e-06	1.79025	0.77488	105	26	0.660806	0.168502	1.1197	0.268473
555443	NM_001109700,XM_005162701	plcd1a	phospholipase C, delta 1a	protein_coding	NP_001103170.1;XP_005162758.1	ZDB-GENE-071004-78	-6.3753	5.69123	1.41914e-32	1.2437e-30	3.90719	6.49651	598	3265	1.96496	11.1397	3.32952	17.7489
555467	XM_005161102,XM_021469028,XM_021469029	specc1lb	sperm antigen with calponin homology and coiled-coil domains 1-like b, transcript variant X3	protein_coding	XP_005161159.1;XP_021324703.1;XP_021324704.1	ZDB-GENE-090423-1	-2.00755	2.74313	4.11467e-05	0.000193621	2.43982	3.30569	189	325	0.421549	0.751065	0.714293	1.19667
555473	XM_021471794,XM_677888	adcyap1r1b	adenylate cyclase activating polypeptide 1b (pituitary) receptor type I	protein_coding	XP_021327469.1	ZDB-GENE-110127-1	3.12551	1.74113	1.96855e-08	1.75965e-07	2.57636	1.37082	212	58	1.22016	0.336667	2.06751	0.53641
555478	XM_021471856,XM_021477720,XM_677895	si:ch211-106j24.1	si:ch211-106j24.1, transcript variant X1	protein_coding	XP_021333395.1;XP_682987.1	ZDB-GENE-130530-595	-3.90197	1.32414	6.16782e-10	6.98212e-09	1.00498	2.30396	43	144	0.158066	0.540236	0.267836	0.860755
555479	XM_005160161,XM_009298625	triobpa	TRIO and F-actin binding protein a, transcript variant X2	protein_coding	XP_005160218.1;XP_009296900.1	ZDB-GENE-110411-40	3.51449	2.67153	2.47069e-12	3.79592e-11	3.43451	1.92201	419	102	2.76508	0.408971	4.68529	0.651611
555481	NM_001099240	zgc:154142	zgc:154142	protein_coding	NP_001092710.1	ZDB-GENE-070615-2	2.29813	1.62627	3.46493e-05	0.000165858	2.38267	1.50198	180	67	0.579415	0.220803	0.981789	0.351805
555510	NM_001109701	cyp2aa12	cytochrome P450, family 2, subfamily AA, polypeptide 12	protein_coding	NP_001103171.2	ZDB-GENE-071004-47	7.4772	-0.16841	1.92711e-08	1.72554e-07	1.29386	0.252701	62	7	0.369295	0.03776	0.625751	0.060163
555531	XM_021468149,XM_697904	si:ch211-152p11.4	si:ch211-152p11.4, transcript variant X2	protein_coding	XP_021323824.1;XP_702996.5	ZDB-GENE-060503-764	-8.95559	2.66185	3.34079e-29	2.4064e-27	1.17919	3.62637	54	415	0.557221	4.46225	0.944181	7.10968
555536	XM_021468288,XM_678062	si:dkey-240h12.4	si:dkey-240h12.4, transcript variant X2	protein_coding	XP_021323963.1;XP_683154.4	ZDB-GENE-070705-406	-3.79278	2.89544	1.93775e-14	3.89644e-13	2.03245	3.67042	132	429	0.957966	3.19727	1.62322	5.0942
555569	XM_021467952,XM_021473220	otogl	otogelin-like, transcript variant X1	protein_coding	XP_021323627.1	ZDB-GENE-050419-93	2.73677	-0.939708	0.0140563	0.0339082	0.747673	0.317457	29	9	0.04814	0.013757	0.081571	0.021919
555576	XM_002665739,XM_009294784	grm1a	glutamate receptor, metabotropic 1a, transcript variant X2	protein_coding	XP_002665785.3;XP_009293059.1	ZDB-GENE-030131-7893	2.0597	4.34151	2.2793e-06	1.39402e-05	4.81814	3.82874	1162	483	3.6488	1.53694	6.18271	2.44879
555583	XM_017353955,XM_017353956,XM_678134	dlec1	deleted in lung and esophageal cancer 1, transcript variant X2	protein_coding	XP_017209444.1;XP_017209445.1;XP_683226.4	ZDB-GENE-091204-65	-4.7587	2.57681	2.2794e-17	6.24252e-16	1.61385	3.43535	88	359	0.24845	1.05084	0.420986	1.6743
555589	NM_001098732	hspb15	heat shock protein, alpha-crystallin-related, b15	protein_coding	NP_001092202.1	ZDB-GENE-080214-5	3.39431	-0.723646	0.00125538	0.00413151	0.882056	0.317457	36	9	0.391028	0.101718	0.662576	0.162066
555593	NM_001128332,XM_005159330,XM_009293949,XM_021468068,XM_021468069,XM_021468070	si:ch211-80h18.1	si:ch211-80h18.1	protein_coding	NP_001121804.1;XP_005159387.1;XP_009292224.1;XP_021323743.1;XP_021323744.1;XP_021323745.1	ZDB-GENE-070705-257	2.06416	1.77221	0.000198454	0.000798409	2.46451	1.67258	193	80	1.17766	0.493414	1.99549	0.786154
555628	XM_678195	itpripl2	inositol 1,4,5-trisphosphate receptor interacting protein like 2	protein_coding	XP_683287.5	.	-2.04983	-0.0947826	0.0168426	0.0395678	0.664862	1.13967	25	44	0.079876	0.145973	0.135346	0.232578
555629	NM_001163923,XM_017352782,XM_021468847	ccbe1	collagen and calcium binding EGF domains 1	protein_coding	NP_001157395.1;XP_017208271.1;XP_021324522.1	ZDB-GENE-090506-7	-2.60001	1.96918	4.61065e-07	3.25859e-06	1.65733	2.72385	92	205	1.03849	2.21057	1.75967	3.5221
555639	NM_001044791	cd164	CD164 molecule, sialomucin	protein_coding	NP_001038256.1	ZDB-GENE-030131-1598	-2.1598	3.34177	2.03848e-06	1.25993e-05	2.88611	3.88857	273	505	2.47583	4.71357	4.19517	7.51011
555655	NM_001039807	bmpr2b	bone morphogenetic protein receptor, type II b (serine/threonine kinase)	protein_coding	NP_001034896.1	ZDB-GENE-070618-2	-5.20868	2.18276	3.57692e-17	9.54738e-16	1.29386	3.1002	62	277	0.237034	1.09178	0.401642	1.73953
555681	NM_001137657,XM_005155380	frem2a	Fras1 related extracellular matrix protein 2a	protein_coding	NP_001131129.1;XP_005155437.1	ZDB-GENE-081119-3	6.89913	1.23355	4.37656e-15	9.48992e-14	2.31639	0.654718	170	21	0.237785	0.029756	0.402915	0.04741
555691	NM_001045549,XM_009291899,XM_017350959,XM_017350960,XM_021481415	kcnj13	potassium inwardly-rectifying channel, subfamily J, member 13	protein_coding	NP_001039014.1;XP_009290174.1;XP_017206448.1;XP_017206449.1;XP_021337090.1	ZDB-GENE-070129-1	102.556	2.16758	2.17039e-46	4.00437e-44	3.28309	0.113759	373	3	1.28412	0.009885	2.17588	0.01575
555714	NM_001044338,XM_009299961	rad51ap1	RAD51 associated protein 1	protein_coding	NP_001037803.2;XP_009298236.1	ZDB-GENE-050419-96	-2.85904	0.614019	2.29554e-05	0.000114521	0.825989	1.6849	33	81	0.277818	0.711129	0.470749	1.13304
555724	NM_001128234,XM_009307624,XR_002459807	slc30a10	solute carrier family 30, member 10	protein_coding	NP_001121706.1;XP_009305899.1	ZDB-GENE-060608-2	2.43067	0.36021	0.00101524	0.00341056	1.4504	0.77488	74	26	0.520986	0.194669	0.882784	0.310165
555728	XM_021478845,XM_021478846,XM_021478847,XM_021478848,XM_021478849,XM_021478850	carf	calcium responsive transcription factor, transcript variant X4	protein_coding	XP_021334520.1;XP_021334521.1;XP_021334522.1;XP_021334523.1;XP_021334524.1;XP_021334525.1	ZDB-GENE-070912-172	2.1479	5.40235	2.29328e-07	1.72946e-06	5.87353	4.79849	2461	981	13.2858	5.68393	22.5121	9.05618
555744	NM_001326533	grhl2a	grainyhead-like transcription factor 2a	protein_coding	NP_001313462.1	ZDB-GENE-050913-123	-4.24793	6.05159	5.52128e-22	2.38056e-20	4.71516	6.75943	1079	3925	6.54779	24.472	11.0949	38.9912
555747	NM_001042684,NM_001042684_dup1	chrna6	cholinergic receptor, nicotinic, alpha 6	protein_coding	NP_001036149.1	ZDB-GENE-090312-91	2.51038	1.21562	3.24053e-05	0.000156397	2.08117	1.19242	138	47	1.10199	0.381197	1.00721	0.353068
555748	NM_001145557,XM_005155398	ugp2a	UDP-glucose pyrophosphorylase 2a	protein_coding	NP_001139029.1;XP_005155455.2	ZDB-GENE-090311-46	-3.05418	0.238047	6.49923e-05	0.000292403	0.643394	1.44516	24	63	0.196738	0.549219	0.333363	0.875069
555753	NM_001030094,NM_001030094_dup1,NM_001030094_dup2	znf1005	zinc finger protein 1005	protein_coding	NP_001025265.3	ZDB-GENE-050913-136	-2.15698	0.0579056	0.00690226	0.0184537	0.706862	1.2433	27	50	0.215813	0.418368	0.365684	0.666583
555766	NM_001037375,XM_005158213,XR_001795962	etv2	ets variant 2	protein_coding	NP_001032452.1;XP_005158270.1	ZDB-GENE-050622-14	2.82973	0.801693	1.449e-05	7.52888e-05	1.79998	0.906995	106	32	1.12576	0.300417	1.90754	0.478652
555772	NR_137200	ftr52p	finTRIM family, member 52, pseudogene	transcribed_pseudogene	.	ZDB-GENEP-110922-3	-2.42821	2.00432	2.33403e-06	1.4246e-05	1.73042	2.72981	99	206	0.747803	1.60789	1.26711	2.56184
555778	NM_001039808,NM_001039808_dup1	slc2a1a	solute carrier family 2 (facilitated glucose transporter), member 1a	protein_coding	NP_001034897.1	ZDB-GENE-030131-3158	2.32518	1.97491	9.11876e-06	4.93993e-05	2.68015	1.73317	231	85	2.11694	0.802175	2.95	1.2781
555782	XM_009297924,XM_009297926,XM_021470645	ccdc135	coiled-coil domain containing 135, transcript variant X1	protein_coding	XP_009296199.1;XP_009296201.1;XP_021326320.1	ZDB-GENE-120406-10	-2.00882	1.49777	0.000511181	0.00185421	1.51092	2.23858	79	136	0.410645	0.728425	0.695816	1.1606
555788	NM_001030095,XM_005164583	srgap1b	SLIT-ROBO Rho GTPase activating protein 1b	protein_coding	NP_001025266.1;XP_005164640.1	ZDB-GENE-041210-103	4.01842	2.34648	1.54625e-13	2.76315e-12	3.17503	1.58323	343	73	0.960707	0.209155	1.62787	0.333245
555791	NM_001089574,NM_001089574_dup1,XM_005171869,XM_005171870	zgc:162952	zgc:162952	protein_coding	NP_001083043.1;XP_005171926.1;XP_005171927.1	ZDB-GENE-070424-98	-4.26402	3.99954	2.44268e-19	8.12927e-18	2.82067	4.74799	259	946	1.65684	6.34523	2.80742	10.1087
555793	XM_005168774,XM_021477267,XM_021477268,XM_678412,XR_002459113	LOC555793	protein FAM107B, transcript variant X3	protein_coding	XP_005168831.2;XP_683504.5	.	2.2834	6.48024	1.4539e-08	1.32956e-07	6.96676	5.79026	5299	1987	27.8226	10.6433	47.144	16.958
555812	NM_131176,XM_009305562	ucp2	uncoupling protein 2	protein_coding	NP_571251.1;XP_009303837.1	ZDB-GENE-990708-8	-2.23072	7.73394	2.70054e-08	2.3657e-07	7.05274	8.20426	5627	10748	59.8726	117.402	101.451	187.056
555815	NM_001029953	c1qtnf5	C1q and TNF related 5	protein_coding	NP_001025124.1	ZDB-GENE-050706-101	4.95016	1.70129	5.72678e-14	1.08125e-12	2.65356	1.04724	226	39	3.22172	0.557151	5.45904	0.887706
555840	XM_678484,XR_002459479,XR_002459480	pdk1	pyruvate dehydrogenase kinase, isozyme 1, transcript variant X3	protein_coding	XP_683576.2	ZDB-GENE-091204-402	-2.41863	5.78746	1.92562e-09	2.03016e-08	5.05708	6.30571	1379	2856	3.90643	8.38076	6.61924	13.353
555879	XM_678522	si:dkey-88n24.11	si:dkey-88n24.11	protein_coding	XP_683614.1	ZDB-GENE-160113-7	-2.39311	3.77228	3.15101e-08	2.73413e-07	3.17503	4.33811	343	703	2.96646	6.24711	5.02651	9.9535
555911	XM_009292394	npr1b	natriuretic peptide receptor 1b	protein_coding	XP_009290669.2	ZDB-GENE-100805-4	5.01661	0.63842	1.76048e-09	1.87078e-08	1.79998	0.577503	106	18	0.372438	0.062779	0.631077	0.100025
555918	XM_678578	zdhhc8a	zinc finger, DHHC-type containing 8a	protein_coding	XP_683670.3	ZDB-GENE-091118-26	3.71699	4.64235	3.33728e-17	8.95319e-16	5.33078	3.53061	1676	386	10.6377	2.5134	18.025	4.0046
555939	NM_001297676	avpr1ab	arginine vasopressin receptor 1Ab	protein_coding	NP_001284605.1	ZDB-GENE-041210-105	-11.3136	0.0762017	3.11169e-12	4.74262e-11	0.218988	1.52958	7	69	0.072421	0.828155	0.122713	1.3195
555941	NM_001114548,XM_009301497,XM_009301500,XM_009301501,XM_009301504,XM_009301505,XM_017356095,XM_017356096,XM_017356097,XM_021476173,XM_021476174,XM_021476175,XM_021476176,XM_021476178,XM_021476179,XM_021476180,XM_021476181,XM_021476182,XR_002458764	cacna1ba	calcium channel, voltage-dependent, N type, alpha 1B subunit, a	protein_coding	NP_001108020.1;XP_009299772.1;XP_009299775.1;XP_009299776.1;XP_009299779.1;XP_009299780.1;XP_017211584.1;XP_017211585.1;XP_017211586.1;XP_021331848.1;XP_021331849.1;XP_021331850.1;XP_021331851.1;XP_021331853.1;XP_021331854.1;XP_021331855.1;XP_021331856.1;XP_021331857.1	ZDB-GENE-060531-44	3.29603	3.94547	8.65207e-14	1.60334e-12	4.61669	3.02464	1005	261	1.62045	0.455738	2.74577	0.726125
555945	XM_009302661,XM_021477264,XM_021477265,XM_678606	camk1a	calcium/calmodulin-dependent protein kinase Ia, transcript variant X1	protein_coding	XP_009300936.3;XP_683698.3	ZDB-GENE-131120-147	6.06186	-1.1319	0.000313333	0.00119977	0.747673	0.149769	29	4	0.258733	0.034245	0.438409	0.054562
555952	XM_021479000,XM_678615	si:dkey-3d4.3	si:dkey-3d4.3, transcript variant X1	protein_coding	XP_021334675.1;XP_683707.1	ZDB-GENE-070912-527	-2.44285	-0.23603	0.00366341	0.0105927	0.554179	1.10341	20	42	0.181526	0.40483	0.307586	0.645015
555957	XM_021469640,XM_021469641,XM_021469642,XM_021469643,XM_021469644,XM_021469645	ephb3b	eph receptor B3b, transcript variant X6	protein_coding	XP_021325315.1;XP_021325316.1;XP_021325317.1;XP_021325318.1;XP_021325319.1;XP_021325320.1	ZDB-GENE-100811-1	-3.06841	2.99818	3.49913e-11	4.70871e-10	2.29589	3.70108	167	439	0.8046	2.38494	1.36335	3.79992
555969	NM_001044341,XM_005170036,XM_009294214,XM_021468072	lpcat1	lysophosphatidylcholine acyltransferase 1	protein_coding	NP_001037806.2;XP_005170093.1;XP_009292489.1;XP_021323747.1	ZDB-GENE-060503-915	-4.20726	4.36732	1.01438e-19	3.56778e-18	3.15621	5.10055	338	1218	2.22267	9.06368	3.76619	14.4411
555972	NM_001082803	rcc1l	RCC1 like	protein_coding	NP_001076272.1	ZDB-GENE-060526-370	2.37401	3.85884	4.17583e-08	3.5444e-07	4.41452	3.257	868	313	7.89111	2.9192	13.3711	4.65116
556003	XM_005166554,XM_678693	sema4f	sema domain, immunoglobulin domain (Ig), transmembrane domain (TM) and short cytoplasmic domain, (semaphorin) 4F, transcript variant X1	protein_coding	XP_005166611.1;XP_683785.5	ZDB-GENE-130530-860	2.07021	2.86508	1.68474e-05	8.64905e-05	3.4251	2.51194	416	172	1.70693	0.724659	2.8923	1.1546
556012	NM_001039921,NM_001039921_dup1	pcmtd2	protein-L-isoaspartate (D-aspartate) O-methyltransferase domain containing 2	protein_coding	NP_001035010.1	ZDB-GENE-060312-14	3.09661	2.38556	8.17118e-10	9.11264e-09	3.13713	1.81394	333	92	3.58087	1.01639	6.0676	1.61941
556013	XM_021466797,XM_021466798,XM_021466799	grik2	glutamate receptor, ionotropic, kainate 2, transcript variant X1	protein_coding	XP_021322472.1;XP_021322473.1;XP_021322474.1	ZDB-GENE-080414-1	3.88796	2.77126	3.32172e-14	6.47505e-13	3.55437	1.91156	459	101	1.5926	0.359387	2.69857	0.57261
556058	NM_001145562,NM_001145562_dup1,NM_001145562_dup2	si:ch211-194c3.5	si:ch211-194c3.5	protein_coding	NP_001139034.1	ZDB-GENE-090313-63	3.42809	5.48223	3.25059e-16	7.94995e-15	6.13139	4.40296	2951	737	11.9459	3.06133	5.3377	1.92919
556126	XM_009291903,XM_678858	gal3st2	galactose-3-O-sulfotransferase 2, transcript variant X2	protein_coding	XP_009290178.1;XP_683950.6	ZDB-GENE-131127-533	2.69479	1.25801	6.52184e-06	3.64824e-05	2.136	1.17505	145	46	0.75625	0.243472	1.28143	0.387922
556154	NM_001130397,XM_005165471	mamdc2a	MAM domain containing 2a	protein_coding	NP_001123869.1;XP_005165528.1	ZDB-GENE-060526-16	-3.56075	3.55185	8.55545e-15	1.79588e-13	2.61547	4.26817	219	668	1.6273	5.13979	2.75737	8.1892
556193	NM_001145563,XM_017354910	sgms2	sphingomyelin synthase 2	protein_coding	NP_001139035.1;XP_017210399.1	ZDB-GENE-070730-2	-2.68439	1.46248	1.39515e-06	8.90568e-06	1.30757	2.31193	63	145	0.572163	1.57852	0.9695	2.51505
556195	XM_005155280,XM_021472273,XM_678946	mtus2a	microtubule associated tumor suppressor candidate 2a, transcript variant X1	protein_coding	XP_005155337.1;XP_684038.3	ZDB-GENE-091204-75	2.25082	0.0565552	0.00472574	0.0132405	1.23767	0.679564	58	22	0.215941	0.084954	0.365901	0.135356
556202	XM_009307208,XM_017358953	si:dkey-155h10.3	si:dkey-155h10.3, transcript variant X2	protein_coding	XP_009305483.1;XP_017214442.1	ZDB-GENE-141215-66	-3.46675	-0.957664	0.00188854	0.00589605	0.275901	0.797757	9	27	0.040451	0.135096	0.068542	0.215248
556215	XM_021467402	cuzd1.1	CUB and zona pellucida-like domains 1, tandem duplicate 1	protein_coding	XP_021323077.1	ZDB-GENE-131122-16	3.39734	-0.585032	0.000864433	0.00295012	0.953575	0.348776	40	10	0.075072	0.018062	0.127206	0.028777
556220	NM_001110834	si:dkey-29d8.3	si:dkey-29d8.3	protein_coding	NP_001104304.1	ZDB-GENE-070912-508	-2.01416	0.673604	0.00303552	0.00897346	1.02172	1.6222	44	76	0.448811	0.806032	0.760487	1.28425
556226	NM_001039923,NM_001039923_dup1,XM_021469812,XM_021469813,XM_021469814	cdc42l2	cell division cycle 42 like 2	protein_coding	NP_001035012.1	ZDB-GENE-060312-21	2.51324	0.764504	0.000122116	0.000518776	1.74057	0.948475	100	34	0.830567	0.246133	0.430336	0.266701
556228	XM_021470321,XM_678981	pex2	peroxisomal biogenesis factor 2	protein_coding	XP_684073.2	ZDB-GENE-070530-2	-2.17794	2.07271	2.60755e-05	0.000128562	1.85705	2.74754	112	209	0.468491	0.903408	0.793834	1.43939
556237	NM_001099979,NM_001099979_dup1,NM_001099979_dup2	man1b1b	mannosidase, alpha, class 1B, member 1	protein_coding	NP_001093449.1	ZDB-GENE-070705-482	-2.26145	-0.451463	0.0133442	0.0324848	0.507414	0.968776	18	35	0.117058	0.236573	0.198348	0.37693
556245	NM_001128235	si:dkey-20d21.12	si:dkey-20d21.12	protein_coding	NP_001121707.1	ZDB-GENE-081104-365	2.16024	-0.497689	0.0229474	0.0515929	0.918259	0.49592	38	15	0.480494	0.192195	0.814171	0.306224
556251	XM_009302646,XM_679004	cntn3b	contactin 3b, transcript variant X2	protein_coding	XP_009300921.1;XP_684096.6	ZDB-GENE-130530-645	-2.02991	0.192663	0.00815017	0.0212683	0.787362	1.30847	31	54	0.114923	0.205475	0.194731	0.327382
556280	NM_001145564,XM_021474923	cyp2u1	cytochrome P450, family 2, subfamily U, polypeptide 1	protein_coding	NP_001139036.1;XP_021330598.1	ZDB-GENE-070730-1	-3.33174	0.594014	1.70133e-06	1.06627e-05	0.747673	1.70924	29	83	0.255352	0.699458	0.432681	1.11444
556288	NM_001327835	fbxo28	F-box protein 28	protein_coding	NP_001314764.1	ZDB-GENE-030131-4665	-2.35043	2.5372	9.91045e-07	6.50582e-06	2.15129	3.18507	147	296	0.909975	1.88467	1.54191	3.00283
556291	XM_679055	gnpda2	glucosamine-6-phosphate deaminase 2	protein_coding	XP_684147.2	ZDB-GENE-091117-41	-2.14606	1.69807	0.000100547	0.000433362	1.60276	2.42645	87	160	1.03263	1.95734	1.74974	3.11862
556296	XM_017351508	dcst2	DC-STAMP domain containing 2	protein_coding	XP_017206997.1	ZDB-GENE-070809-6	-2.40728	2.82757	2.44113e-07	1.83307e-06	2.3631	3.45707	177	365	0.714729	1.51218	1.21107	2.40935
556298	NM_001312897,NR_132439,XR_001798158	micall2b	mical-like 2b	protein_coding	NP_001299826.1	ZDB-GENE-030131-5803	-2.21757	2.91367	2.04955e-06	1.26565e-05	2.50078	3.50304	199	378	0.883261	1.73495	1.49664	2.76429
556313	NM_001045399,NM_001045399_dup1,NM_001045399_dup2	zgc:153733	zgc:153733	protein_coding	NP_001038864.1	ZDB-GENE-060825-273	-2.51481	0.681722	0.000161425	0.000664043	0.918259	1.69712	38	82	0.459662	1.0203	0.146751	0.479964
556322	NM_001110023,NM_001110023_dup1,NM_001110023_dup2,XM_005168768	zgc:162324	zgc:162324	protein_coding	NP_001103493.1	ZDB-GENE-070410-73	10.8473	-0.450935	1.69207e-08	1.53138e-07	1.14904	0.149769	52	4	0.327966	0.018047	0.100952	0.010991
556341	NM_001083545,XM_021474930,XR_002458102,XR_002458104	mhc1zca	major histocompatibility complex class I ZCA	protein_coding	NP_001077014.1;XP_021330605.1	ZDB-GENE-070424-4	-10.6578	1.06155	7.41878e-19	2.38592e-17	0.434294	2.25521	15	138	0.101436	0.961711	0.171878	1.53229
556343	XM_009297491	lrrc31	leucine rich repeat containing 31	protein_coding	XP_009295766.1	ZDB-GENE-091204-286	-2.60304	1.26372	7.8193e-06	4.30082e-05	1.20872	2.14356	56	125	0.427759	0.984531	0.724816	1.56865
556369	NM_001044800,XM_005160332,XM_009294516,XM_021468424,XM_021468425	tmem200a	transmembrane protein 200A	protein_coding	NP_001038265.1;XP_005160389.1;XP_009292791.1;XP_021324099.1;XP_021324100.1	ZDB-GENE-040724-81	-2.31962	-1.07953	0.0370978	0.0771739	0.330654	0.679564	11	22	0.110041	0.126851	0.18646	0.202111
556374	NM_001044345,XM_005173958,XM_009296103	si:dkey-102c8.3	si:dkey-102c8.3	protein_coding	NP_001037810.1;XP_005174015.1;XP_009294378.1	ZDB-GENE-050208-328	-5.76319	2.75768	1.41072e-21	5.79526e-20	1.58035	3.64226	85	420	0.510185	3.0521	0.864482	4.8629
556392	XM_009300035,XM_021475407,XM_021475408	strip2	striatin interacting protein 2, transcript variant X3	protein_coding	XP_009298310.1;XP_021331082.1;XP_021331083.1	ZDB-GENE-120328-1	2.14944	3.57919	1.59589e-06	1.00588e-05	4.10666	3.0956	693	276	2.81907	1.15033	4.77677	1.83282
556393	NM_001076557	dhrs12	dehydrogenase/reductase (SDR family) member 12	protein_coding	NP_001070025.1	ZDB-GENE-060929-1134	-2.2185	3.68374	4.80982e-07	3.38571e-06	3.16377	4.2224	340	646	3.33822	6.52696	5.65644	10.3994
556406	XM_005172017,XM_009301892,XM_021476654,XM_021476655,XM_021476656,XM_679197	clip2	CAP-GLY domain containing linker protein 2, transcript variant X2	protein_coding	XP_021332329.1;XP_021332330.1;XP_021332331.1	ZDB-GENE-100727-3	-2.8029	4.07223	4.24859e-11	5.63433e-10	3.29691	4.6865	377	905	1.31897	3.33241	2.23493	5.30952
556429	NM_001145686,NM_001145686_dup1,XM_005158780	htr1d	5-hydroxytryptamine (serotonin) receptor 1D, G protein-coupled	protein_coding	NP_001139158.1;XP_005158837.1	ZDB-GENE-090409-3	2.05006	3.81969	4.59677e-06	2.66494e-05	4.3145	3.3528	807	337	6.39359	2.62085	5.77728	2.46626
556445	NM_001083825,XM_005173960,XR_002456414	gls2b	glutaminase 2b (liver, mitochondrial)	protein_coding	NP_001077294.1;XP_005174017.1	ZDB-GENE-050208-408	2.21921	-0.0864026	0.00921389	0.0236769	1.14904	0.629436	52	20	0.319174	0.117176	0.540824	0.186696
556459	NM_001099980,NM_001099980_dup1,XM_005164822,XM_005164823,XM_009300388,XM_017355021	fgd6	FYVE, RhoGEF and PH domain containing 6	protein_coding	NP_001093450.1;XP_005164879.1;XP_005164880.1;XP_009298663.1;XP_017210510.1	ZDB-GENE-041210-200	2.14224	2.98706	5.34907e-06	3.06225e-05	3.55149	2.58609	458	183	1.50652	0.665288	1.70112	0.630163
556493	NM_200330,NM_200330_dup1	ncapd3	non-SMC condensin II complex, subunit D3	protein_coding	NP_956624.1	ZDB-GENE-040426-737	-2.13266	2.02656	4.76384e-05	0.000221041	1.83828	2.69976	110	201	0.381736	0.717261	0.356758	0.942258
556502	NM_001326709	adma	adrenomedullin a	protein_coding	NP_001313638.1	ZDB-GENE-120221-5	2.17001	3.4059	1.7059e-06	1.06881e-05	3.94717	2.93462	616	243	5.97281	2.42313	10.1206	3.86076
556520	XM_001920737	celsr1b	cadherin EGF LAG seven-pass G-type receptor 1b	protein_coding	XP_001920772.2	ZDB-GENE-050823-4	2.06083	3.35551	8.37604e-06	4.58069e-05	3.87762	2.93462	585	243	0.698142	0.297321	1.18297	0.47372
556522	NM_001077551	agmat	agmatine ureohydrolase (agmatinase)	protein_coding	NP_001071019.1	ZDB-GENE-060929-696	-2.00891	0.0909871	0.0098652	0.0251353	0.747673	1.2433	29	50	0.307991	0.551205	0.521875	0.878233
[truncated: 3,890 more rows]
