# Supplementary material for: Transgenic Overexpression of Myocilin Leads to Variable Ocular Anterior Segment and Retinal Alterations Associated with Extracellular Matrix Abnormalities in Adult Zebrafish
Source: Preprints.org preprint supplement (doi:10.20944/preprints202208.0053.v1), 2022-08-02
Supplement: Supplementary file 2 [file Supplementary_Table_S7.xlsx]

## Sheet: data3_CF_R_vs_WT_1_R_fc2_&_raw.
Supplementary Table S7. Raw RNAseq data used to identify DEGs comparing the transcriptome of altered transgenic eyes (Tg_OA) with replica 1 of the ocular wild type transcriptome (WT_1).
Gene_ID	Transcript_ID	Gene_Symbol	Description	gene_biotype	Protein_ID	ZFIN	Fold-Change (Tg_OA vs. WT_1)	Log reads per million mapped reads (Tg_OA vs. WT_1)	Raw p value (Tg_OA vs. WT_1)	Benjamini-Hochberg adjusted p-value (Tg_OA_R vs. WT_1)	Tg_OA mean	WT_1 mean	Tg_OA Read Count	WT_1_R_Read_Count	Tg_OA fragments per kilobase of transcript per million fragments mapped	WT_1 fragments per kilobase of transcript per million fragments mapped	Tg_OA transcripts per million	WT_1 transcripts per million
30038	NM_130908,NM_130908_dup1	sox19a	SRY (sex determining region Y)-box 19a	protein_coding	NP_570983.2	ZDB-GENE-980526-102	-9.52067	1.63801	2.0126e-22	8.20367e-21	0.664862	2.72262	25	200	0.174417	1.48155	0.295541	0.742216
30070	NM_130914,NM_130914_dup1	tbx4	T-box 4	protein_coding	NP_570989.2	ZDB-GENE-991124-5	2.34172	0.989658	0.000234113	0.00116907	1.88476	1.10309	115	41	0.797913	0.293122	1.11488	0.397982
30072	NM_130916	inhbaa	inhibin, beta Aa	protein_coding	NP_570991.1	ZDB-GENE-000210-21	2.52626	3.49572	1.12074e-08	1.33404e-07	4.09287	2.87908	686	227	3.1199	1.07601	5.28651	1.67016
30079	NM_130922	btg2	B-cell translocation gene 2	protein_coding	NP_570997.1	ZDB-GENE-000210-15	-2.36308	6.55256	3.55749e-09	4.56805e-08	5.82787	7.05386	2383	4709	17.8084	36.6508	30.1754	56.8883
30084	NM_130927	nme2b.2	NME/NM23 nucleoside diphosphate kinase 2b, tandem duplicate 2	protein_coding	NP_571002.1	ZDB-GENE-000210-33	2.32175	6.36692	7.94153e-09	9.72826e-08	6.86146	5.6625	4923	1773	93.7842	35.1675	158.912	54.586
30093	NM_001308956,NM_130930	elk4	ELK4, ETS-domain protein	protein_coding	NP_001295885.1;NP_571005.2	ZDB-GENE-030716-1	-2.4625	0.374709	0.0006773	0.00297528	0.787362	1.48142	31	64	0.227905	0.497627	0.386172	0.772403
30095	NM_130932,NM_130932_dup1	ckma	creatine kinase, muscle a	protein_coding	NP_571007.2	ZDB-GENE-980526-109	3.54735	5.70144	4.34415e-17	1.23307e-15	6.35876	4.57597	3462	816	33.9994	8.3395	57.6102	12.9444
30096	NM_130933	zic1	zic family member 1 (odd-paired homolog, Drosophila)	protein_coding	NP_571008.1	ZDB-GENE-000208-4	2.65308	1.24609	7.83098e-06	5.62915e-05	2.12054	1.17643	143	45	0.992094	0.318441	1.68105	0.494276
30100	NM_001008611,NM_001008611_dup1	ube2kb	ubiquitin-conjugating enzyme E2Kb (UBC1 homolog, yeast)	protein_coding	NP_001008611.1	ZDB-GENE-980605-9	-3.25713	3.87629	1.30623e-13	2.74191e-12	2.97902	4.55034	294	801	3.0192	8.58512	5.11588	13.3256
30122	NM_130946,NM_130946_dup1,NM_130946_dup2	wnt8a	wingless-type MMTV integration site family, member 8a	other	.	ZDB-GENE-980526-332	2.1867	3.44189	1.29493e-06	1.09207e-05	3.98393	2.95919	633	242	3.05642	1.21483	5.17894	1.88563
30125	NM_130948,XM_017351595,XM_021467105	gdf3	growth differentiation factor 3	protein_coding	NP_571023.1;XP_017207084.1;XP_021322780.1	ZDB-GENE-980526-389	2.01992	4.65447	3.19938e-06	2.51373e-05	5.11282	4.1403	1435	594	12.0318	5.53772	20.3873	8.5955
30131	NM_130954	dla	deltaA	protein_coding	NP_571029.2	ZDB-GENE-980526-29	12.2236	-0.26612	7.95362e-10	1.10934e-08	1.26604	0.153175	60	4	0.229571	0.013013	0.388996	0.020199
30148	NM_001328376,NM_130963	desma	desmin a	protein_coding	NP_001315305.1;NP_571038.2	ZDB-GENE-980526-221	2.96612	2.64133	9.32531e-10	1.29124e-08	3.35419	2.03858	394	111	3.38078	0.985484	5.72856	1.52964
30157	NM_130970,XM_005163157,XM_021470443,XM_021470444	isl2a	ISL LIM homeobox 2a	protein_coding	NP_571045.1;XP_005163214.1;XP_021326118.1;XP_021326119.1	ZDB-GENE-980526-562	2.26064	2.13943	1.15357e-05	7.95247e-05	2.81108	1.87198	257	95	2.2179	0.81298	3.75811	1.26189
30186	NM_130993	crestin	crestin	protein_coding	NP_571068.2	ZDB-GENE-000208-13	5.7191	-1.15903	0.000488104	0.00222986	0.727412	0.153175	28	4	0.095859	0.013448	0.162427	0.020874
30189	NM_001305542,NM_001305542_dup1,NM_001305542_dup2,XR_001800065	ptch1	patched 1	protein_coding	NP_001292471.1	ZDB-GENE-980526-196	2.09502	1.5276	0.000294684	0.00143541	2.26811	1.49581	163	65	0.525586	0.21504	0.660784	0.187442
30192	NM_130998,XM_005171551,XM_005171552	ntn1b	netrin 1b	protein_coding	NP_571073.1;XP_005171608.1;XP_005171609.1	ZDB-GENE-990415-168	13.4307	0.145738	9.37638e-13	1.82436e-11	1.54605	0.189057	82	5	0.252478	0.014494	0.42781	0.022497
30199	NM_131005,NM_131005_dup1	epd	ependymin	protein_coding	NP_571080.1	ZDB-GENE-980526-111	5.57798	0.1267	5.87626e-08	6.23275e-07	1.4504	0.387406	74	11	1.28267	0.196109	2.17341	0.304395
30211	NM_001164371,NM_131016	pyya	peptide YYa	protein_coding	NP_001157843.1;NP_571091.1	ZDB-GENE-980526-71	4.20761	3.04423	2.07817e-16	5.66195e-15	3.82853	2.04838	564	112	11.4526	2.36081	19.4058	3.66439
30227	NM_131029,NM_131029_dup1,XM_021476776	ntn1a	netrin 1a	protein_coding	NP_571104.1	ZDB-GENE-990415-169	-2.4786	0.702453	0.000161425	0.000842076	0.936025	1.70854	39	81	0.085844	0.186826	0.145458	0.289986
30230	NM_131032	inab	internexin neuronal intermediate filament protein, alpha b	protein_coding	NP_571107.2	ZDB-GENE-990415-83	2.59142	5.0205	2.68068e-10	3.97341e-09	5.57712	4.25053	1996	644	16.1989	5.44017	27.4481	8.44408
30231	NM_131033	nipsnap1	nipsnap homolog 1 (C. elegans)	protein_coding	NP_571108.2	ZDB-GENE-991008-17	-3.78886	-0.730829	0.000608709	0.00270619	0.303537	0.923046	10	32	0.104256	0.344174	0.176657	0.534217
30234	NM_131036,XM_005171264,XM_005171265,XM_009298633	tnw	tenascin W	protein_coding	NP_571111.2;XP_005171321.1;XP_005171322.1;XP_009296908.1	ZDB-GENE-990415-262	2.3764	4.92258	8.85721e-09	1.07189e-07	5.44609	4.24202	1819	640	8.46139	2.92378	14.3374	4.53821
30255	NM_001291499	tfa	transferrin-a	protein_coding	NP_001278428.1	ZDB-GENE-980526-35	-25.2558	7.584	2.6752e-82	8.27463e-80	3.96458	8.53183	624	13181	4.342	95.5867	7.35729	148.367
30259	NM_001319237,XM_017358198	prph	peripherin	protein_coding	NP_001306166.1;XP_017213687.1	ZDB-GENE-990415-207	4.55121	2.77524	7.26502e-17	2.04012e-15	3.59687	1.78086	474	87	3.50351	0.658334	5.93651	1.02185
30264	NM_131058	tbx16	T-box 16	protein_coding	NP_571133.1	ZDB-GENE-990615-5	5.57919	-0.298227	1.32245e-06	1.11349e-05	1.17919	0.291637	54	8	0.325819	0.046638	0.552083	0.07239
30267	NM_131061,NM_131061_dup1	sema3ab	sema domain, immunoglobulin domain (Ig), short basic domain, secreted, (semaphorin) 3Ab	protein_coding	NP_571136.1	ZDB-GENE-991209-6	-3.44246	0.527141	1.9844e-06	1.61838e-05	0.706862	1.67097	27	78	0.177503	0.53239	0.30077	0.826361
30270	NM_131064,XM_005161919,XM_009296612	ngfa	nerve growth factor a (beta polypeptide)	protein_coding	NP_571139.1;XP_005161976.1;XP_009294887.2	ZDB-GENE-990415-176	-12.2164	0.355583	5.88776e-15	1.42015e-13	0.247725	1.73305	8	83	0.086945	1.05929	0.147324	1.64421
30274	NM_131067,XM_005158751	foxg1a	forkhead box G1a	protein_coding	NP_571142.1;XP_005158808.1	ZDB-GENE-990415-267	2.91596	3.28176	1.25176e-10	1.9359e-09	3.94278	2.5677	614	176	3.13989	1.07012	5.32037	1.66101
30281	NM_131074	npy	neuropeptide Y	protein_coding	NP_571149.1	ZDB-GENE-980526-438	2.80921	4.91441	1.04945e-11	1.82272e-10	5.50381	4.06988	1895	564	40.3663	12.5019	68.3986	19.4051
30301	NM_131090	her4.2	hairy-related 4, tandem duplicate 2	protein_coding	NP_571165.3	ZDB-GENE-060815-1	4.32303	0.254811	6.04382e-07	5.4511e-06	1.49902	0.505946	78	15	0.690868	0.137661	1.17064	0.213674
30304	NM_001328408,NM_131092	tdgf1	teratocarcinoma-derived growth factor 1	protein_coding	NP_001315337.1;NP_571167.2	ZDB-GENE-990415-198	-2.80135	-0.587721	0.0022933	0.0084975	0.409074	0.944198	14	33	0.114909	0.291285	0.194707	0.452125
30315	NM_131099,XM_005165099,XM_005165100,XM_009301283	foxn4	forkhead box N4	protein_coding	NP_571174.1;XP_005165156.1;XP_005165157.1;XP_009299558.1	ZDB-GENE-990415-277	3.39664	0.795373	6.03904e-07	5.44912e-06	1.83828	0.812372	110	27	0.616654	0.152046	1.04489	0.236002
30324	NM_131105	tpma	alpha-tropomyosin	protein_coding	NP_571180.1	ZDB-GENE-990415-269	30.515	6.86586	1.29414e-86	4.18765e-84	7.82457	3.06918	9638	264	108.479	3.08794	183.812	4.79302
30331	NM_131110	cahz	carbonic anhydrase	protein_coding	NP_571185.1	ZDB-GENE-980526-39	2.56628	8.14084	7.65263e-11	1.21021e-09	8.66929	7.31513	17343	5651	174.65	59.258	295.936	91.9787
30339	NM_131117,XM_005171554,XM_005171562,XM_017353138,XM_017353140,XM_017353141,XM_017353143,XM_021469305,XM_021469306,XM_021469307	hoxb3a	homeobox B3a	protein_coding	NP_571192.2;XP_005171611.1;XP_005171619.1;XP_017208627.1;XP_017208629.1;XP_017208630.1;XP_017208632.1;XP_021324980.1;XP_021324981.1;XP_021324982.1	ZDB-GENE-990415-104	19.9087	-0.0223	5.52588e-13	1.10062e-11	1.4504	0.116379	74	3	0.249533	0.006112	0.422819	0.009486
30345	NM_131122,XM_021469725	hoxc4a	homeobox C4a	protein_coding	NP_571197.1;XP_021325400.1	ZDB-GENE-990415-112	13.1081	-1.05322	3.93054e-06	3.01389e-05	0.825989	0.0786196	33	2	0.330754	0.020994	0.560446	0.032586
30354	NM_131127	lpl	lipoprotein lipase	protein_coding	NP_571202.1	ZDB-GENE-990415-139	-3.00598	2.97555	8.99447e-11	1.4118e-09	2.29589	3.67373	167	420	1.36901	3.60127	2.31972	5.58979
30355	NM_131128,NM_131128_dup1	apoa1a	apolipoprotein A-Ia	protein_coding	NP_571203.1	ZDB-GENE-990415-14	-8.70847	5.62194	1.07353e-41	9.44751e-40	3.4776	6.48096	433	3154	6.96858	52.9723	8.60013	82.2222
30369	NM_131139,NM_131139_dup1	fzd7a	frizzled class receptor 7a	protein_coding	NP_571214.1	ZDB-GENE-990415-223	2.96133	1.90091	3.0382e-08	3.3527e-07	2.69588	1.51007	234	66	1.32433	0.385382	1.6849	0.557051
30381	NM_131146	cyp26a1	cytochrome P450, family 26, subfamily A, polypeptide 1	protein_coding	NP_571221.2	ZDB-GENE-990415-44	4.29842	5.59856	1.22843e-21	4.82042e-20	6.31275	4.26741	3352	652	28.3324	5.73907	48.0078	8.90803
30395	NM_001005956	twist2	twist2	protein_coding	NP_001005956.1	ZDB-GENE-980526-235	2.57353	0.284312	0.000593123	0.00264584	1.41283	0.717283	71	23	1.04358	0.354638	1.76828	0.550459
30415	NM_131177,NM_131177_dup1	jupa	junction plakoglobin a	protein_coding	NP_571252.1	ZDB-GENE-991207-22	-2.25911	7.4499	1.72422e-08	1.9774e-07	6.75851	7.92685	4581	8654	21.9188	43.1157	35.7772	66.9231
30421	NM_001134685,XM_005162365,XM_005162366,XM_005162367,XM_021469727	hoxc3a	homeo box C3a	protein_coding	NP_001128157.2;XP_005162422.1;XP_005162423.1;XP_005162424.1;XP_021325402.1	ZDB-GENE-980526-532	2.49162	-0.858903	0.0174197	0.047124	0.767654	0.356184	30	10	0.180554	0.062563	0.305939	0.097109
30425	NM_131184,XM_005156735,XM_005156744,XM_005156747,XM_005156748,XM_017358679,XM_017358683,XM_017358684,XM_017358685,XM_021480493,XM_021480494,XM_021480495,XM_021480496,XM_021480497,XM_021480498,XM_021480499,XM_021480500,XM_021480501,XM_021480502,XM_021480503,XM_021480504,XM_021480505,XM_021480506,XM_021480507,XM_021480508,XM_021480509,XM_021480510,XM_021480511,XM_021480512,XM_021480513	pax2a	paired box 2a	protein_coding	NP_571259.1;XP_005156792.1;XP_005156801.1;XP_005156804.1;XP_005156805.1;XP_017214168.1;XP_017214172.1;XP_017214173.1;XP_017214174.1;XP_021336168.1;XP_021336169.1;XP_021336170.1;XP_021336171.1;XP_021336172.1;XP_021336173.1;XP_021336174.1;XP_021336175.1;XP_021336176.1;XP_021336177.1;XP_021336178.1;XP_021336179.1;XP_021336180.1;XP_021336181.1;XP_021336182.1;XP_021336183.1;XP_021336184.1;XP_021336185…	ZDB-GENE-990415-8	2.07389	2.23735	6.25318e-05	0.00036433	2.86308	2.00877	268	108	0.759069	0.302979	1.2862	0.470276
30429	NM_131188,NM_131188_dup1,NM_131188_dup2	mylpfa	myosin light chain, phosphorylatable, fast skeletal muscle a	protein_coding	NP_571263.1	ZDB-GENE-990712-15	4.48586	6.46378	1.49676e-23	6.39864e-22	7.18213	5.05086	6159	1148	68.1327	13.216	60.5299	11.2035
30436	NM_131193,NM_131193_dup1,XM_005162633,XM_005162634,XM_005162635,XM_009297325,XM_009297326,XM_009297327,XM_017353800	eya1	EYA transcriptional coactivator and phosphatase 1	protein_coding	NP_571268.1;XP_005162690.1;XP_005162691.1;XP_005162692.1;XP_009295600.2;XP_009295601.2;XP_009295602.1;XP_017209289.1	ZDB-GENE-990712-18	3.12902	1.10716	6.22028e-07	5.59586e-06	2.05702	1.00585	135	36	0.691139	0.190633	1.02421	0.266063
30440	NM_201448	prim1	primase, DNA, polypeptide 1	protein_coding	NP_958856.1	ZDB-GENE-990603-6	-2.01443	2.52511	5.83437e-05	0.000341537	2.26108	3.11186	162	273	1.5196	2.67496	2.57487	4.152
30444	NM_131199	shhb	sonic hedgehog b	protein_coding	NP_571274.2	ZDB-GENE-980526-41	2.1227	0.0357304	0.00758323	0.0236014	1.20872	0.692498	56	22	0.434349	0.175069	0.735982	0.271737
30457	NM_131210	acvr2b	activin A receptor, type IIB	protein_coding	NP_571285.1	ZDB-GENE-980526-549	-5.28638	0.905879	2.32041e-11	3.85812e-10	0.664862	2.03858	25	111	0.086282	0.412827	0.1462	0.640778
30466	NM_131219	ascl1a	achaete-scute family bHLH transcription factor 1a	protein_coding	NP_571294.1	ZDB-GENE-980526-90	6.23879	1.69125	1.28701e-16	3.56181e-15	2.68542	0.90158	232	31	2.30338	0.316189	3.90296	0.49078
30489	NM_131241,NM_131241_dup1,XM_021468750,XR_659369	bfb	complement component bfb	protein_coding	NP_571316.1;XP_021324425.1	ZDB-GENE-990415-34	-8.06629	0.269464	9.97452e-12	1.73927e-10	0.330654	1.63239	11	75	0.094577	0.777636	0.10588	1.20703
30491	NM_131243,XM_021478306	c3a.2	complement component c3a, duplicate 2	protein_coding	NP_571318.1;XP_021333981.1	ZDB-GENE-990415-36	-22.1858	2.52285	2.29628e-42	2.08179e-40	0.577005	3.58224	21	392	0.060998	1.22318	0.103357	1.89859
30498	NM_131248,NM_131248_dup1	egr1	early growth response 1	protein_coding	NP_571323.1	ZDB-GENE-980526-320	-3.2398	4.53069	2.65476e-14	5.91501e-13	3.57152	5.18128	465	1260	4.68371	13.2274	7.93631	20.5312
30503	NM_131253	opn1mw1	opsin 1 (cone pigments), medium-wave-sensitive, 1	protein_coding	NP_571328.2	ZDB-GENE-990604-42	-4.36603	6.85337	4.94371e-23	2.06312e-21	5.46227	7.56322	1840	6718	18.2511	69.4039	30.9256	107.727
30513	NM_131262	myod1	myogenic differentiation 1	protein_coding	NP_571337.2	ZDB-GENE-980526-561	5.24228	-0.213505	1.11751e-06	9.51991e-06	1.22327	0.324272	57	9	0.505771	0.079935	0.857003	0.124073
30518	NM_131265	vtg3	vitellogenin 3, phosvitinless	protein_coding	NP_571340.1	ZDB-GENE-991019-2	-114.589	8.03749	1.07246e-138	1.5038e-135	2.47062	9.02769	194	18602	0.756693	75.5696	1.28218	117.297
30524	NM_131270,NM_131270_dup1	foxd5	forkhead box D5	protein_coding	NP_571345.1	ZDB-GENE-980605-4	2.44971	-0.174883	0.00441553	0.0149017	1.11825	0.561752	50	17	0.671726	0.233292	1.1382	0.362109
30525	NM_131271	foxd2	forkhead box D2	protein_coding	NP_571346.2	ZDB-GENE-980605-6	2.28895	1.77827	2.60537e-05	0.000165106	2.50674	1.60609	200	73	1.34792	0.513088	2.28397	0.796401
30526	NM_131272	msx3	muscle segment homeobox 3	protein_coding	NP_571347.2	ZDB-GENE-980526-306	-3.32054	0.931525	3.52945e-07	3.30816e-06	0.900271	1.95768	37	103	0.278367	0.813384	0.471678	1.26251
30527	NM_131273	msx1a	muscle segment homeobox 1a	protein_coding	NP_571348.1	ZDB-GENE-980526-312	4.12177	-1.00469	0.00128011	0.00515401	0.767654	0.224067	30	6	0.421514	0.075726	0.714234	0.11754
30529	NM_001001811	sox3	SRY (sex determining region Y)-box 3	protein_coding	NP_001001811.2	ZDB-GENE-980526-333	-3.71355	4.70477	2.3594e-17	6.89239e-16	3.59128	5.39415	472	1466	4.13919	13.3989	7.01364	20.7974
30531	NM_131276	msx2b	muscle segment homeobox 2b	protein_coding	NP_571351.3	ZDB-GENE-980526-492	-2.76509	0.88338	1.44839e-05	9.76726e-05	0.970915	1.87198	41	95	0.418518	1.01347	0.709157	1.57308
30534	NM_131278	pou4f3	POU class 4 homeobox 3	protein_coding	NP_571353.1	ZDB-GENE-990415-24	2.80298	2.04257	6.96316e-08	7.28276e-07	2.80142	1.64537	255	76	3.96459	1.22939	6.7178	1.90823
30538	NM_131281	fgf8a	fibroblast growth factor 8a	protein_coding	NP_571356.2	ZDB-GENE-990415-72	2.29266	1.94454	1.52688e-05	0.000102439	2.64818	1.72085	225	82	1.62592	0.612889	2.75504	0.95131
30558	NM_131298,XM_005158833	pax9	paired box 9	protein_coding	NP_571373.1;XP_005158890.1	ZDB-GENE-980526-399	33.3359	0.656076	7.97496e-21	2.97407e-19	1.96483	0.116379	124	3	1.00378	0.017874	1.70085	0.027743
30561	NM_131300	dlx4a	distal-less homeobox 4a	protein_coding	NP_571375.1	ZDB-GENE-980526-73	-5.27816	0.786382	7.22525e-11	1.1452e-09	0.621602	1.94724	23	102	0.287777	1.3436	0.487623	2.0855
30586	NM_131323	dlx6a	distal-less homeobox 6a	protein_coding	NP_571398.1	ZDB-GENE-980526-448	-2.91687	-0.0631423	0.000378252	0.00178221	0.554179	1.24621	20	49	0.211592	0.557125	0.358532	0.864754
30593	NM_131330	zp2.5	zona pellucida glycoprotein 2, tandem duplicate 5	protein_coding	NP_571405.2	ZDB-GENE-090306-1	-34.8476	5.19288	3.20204e-81	9.35396e-79	1.60276	6.17195	87	2539	0.995657	30.4639	1.68709	47.2852
30597	NM_182940	hbae1	hemoglobin, alpha embryonic 1	protein_coding	NP_891985.1	ZDB-GENE-980526-80	81.1812	0.443728	1.9571e-20	7.14649e-19	1.81926	0.0398453	108	1	3.12582	0.028365	5.29654	0.044028
30601	NM_183066	hbae3	hemoglobin alpha embryonic-3	protein_coding	NP_898889.2	ZDB-GENE-990706-3	39.1789	3.10287	2.92696e-55	3.89638e-53	4.13578	0.505946	708	15	18.6355	0.411165	31.5769	0.638199
30603	NM_131337	sox11b	SRY (sex determining region Y)-box 11b	protein_coding	NP_571412.1	ZDB-GENE-980526-466	2.74236	5.17077	2.0649e-11	3.46063e-10	5.74651	4.33703	2250	686	13.1112	4.16302	22.2163	6.46173
30604	NM_131338,NM_131338_dup1,XM_021468751	cfb	complement factor B	protein_coding	NP_571413.2;XP_021324426.1	ZDB-GENE-980526-487	-35.9636	2.61488	2.49164e-49	2.77284e-47	0.409074	3.68947	14	425	0.077624	2.81556	0.065576	2.40751
30608	NM_131341	gap43	growth associated protein 43	protein_coding	NP_571416.1	ZDB-GENE-990415-87	5.94539	5.2958	9.14132e-30	5.22471e-28	6.08984	3.61888	2866	403	42.1959	6.17038	71.4988	9.5775
30631	NM_131359	bmp2a	bone morphogenetic protein 2a	protein_coding	NP_571434.1	ZDB-GENE-980526-388	3.01533	0.322354	8.34855e-05	0.000472029	1.47491	0.667279	76	21	1.0077	0.283336	1.7075	0.439787
30650	NM_131377,NM_131377_dup1,XM_005167661,XM_009304719	pth2r	parathyroid hormone 2 receptor	protein_coding	NP_571452.1;XP_005167718.1;XP_009302994.1	ZDB-GENE-991123-10	3.64913	-0.473658	0.000212314	0.00107346	1.02172	0.356184	44	10	0.269542	0.061949	0.456725	0.096155
30656	NM_131383,XM_009296546	nadl1.1	neural adhesion molecule L1.1	protein_coding	NP_571458.1;XP_009294821.1	ZDB-GENE-980526-512	4.81987	2.53321	6.36908e-17	1.79572e-15	3.38686	1.56572	404	70	0.996404	0.174027	1.68836	0.270121
30665	NM_131391	psmb9a	proteasome subunit beta 9a	protein_coding	NP_571466.1	ZDB-GENE-990415-140	-5.88786	3.72828	7.48321e-26	3.65184e-24	2.27511	4.56236	164	808	2.30144	11.8573	3.89967	18.4046
30671	NM_131397	hsp70.3	heat shock cognate 70-kd protein, tandem duplicate 3	protein_coding	NP_571472.2	ZDB-GENE-110713-1	-4.44621	4.815	1.04698e-21	4.11612e-20	3.50166	5.55231	441	1640	2.89051	11.2112	4.89782	17.4016
30672	NM_131398	ppm1ba	protein phosphatase, Mg2+/Mn2+ dependent, 1Ba	protein_coding	NP_571473.1	ZDB-GENE-991102-16	-5.22967	2.01504	2.29464e-16	6.21949e-15	1.19403	2.95399	55	241	0.584886	2.70465	0.991058	4.19808
30686	NM_131412	myca	MYC proto-oncogene, bHLH transcription factor a	protein_coding	NP_571487.2	ZDB-GENE-990415-162	2.27422	4.34906	8.92192e-08	9.17178e-07	4.86874	3.74476	1205	443	10.1434	3.87543	17.1875	6.01533
30687	XM_682606	epha4l	eph receptor A4, like	protein_coding	XP_687698.2	ZDB-GENE-990415-61	2.95796	0.926145	4.89785e-06	3.68443e-05	1.90294	0.944198	117	33	0.312492	0.089344	0.529501	0.138677
30692	NM_131418,XM_005165618	ebf2	early B-cell factor 2	protein_coding	NP_571493.2;XP_005165675.1	ZDB-GENE-990715-11	2.68378	-0.00707987	0.000811266	0.00348303	1.23767	0.588867	58	18	0.299147	0.092853	0.506889	0.144124
30702	NM_131427,XM_021477394	cpeb1b	cytoplasmic polyadenylation element binding protein 1b	protein_coding	NP_571502.2;XP_021333069.1	ZDB-GENE-990927-1	-2.33531	4.73491	1.90071e-08	2.16212e-07	4.08294	5.25719	681	1330	3.61639	7.32499	6.12779	11.3696
30708	NM_131431,NM_131431_dup1,XM_005170903	fabp2	fatty acid binding protein 2, intestinal	protein_coding	NP_571506.1;XP_005170960.1	ZDB-GENE-991019-5	-7.54192	5.28286	9.67257e-37	7.13836e-35	3.33758	6.12352	389	2454	8.98269	60.4417	12.6759	81.6979
30721	NM_131443,NM_131443_dup1	pdx1	pancreatic and duodenal homeobox 1	protein_coding	NP_571518.2	ZDB-GENE-990415-122	6.61854	0.0582071	1.71346e-08	1.96721e-07	1.42546	0.324272	72	9	0.99743	0.119476	1.47128	0.151446
30724	NM_206888	melk	maternal embryonic leucine zipper kinase	protein_coding	NP_996771.2	ZDB-GENE-990603-5	3.02504	3.66039	8.87756e-12	1.55731e-10	4.3145	2.85695	807	223	4.86143	1.39755	8.23743	2.16924
30731	NM_131448,XM_005161146	smarcb1b	SWI/SNF related, matrix associated, actin dependent regulator of chromatin, subfamily b, member 1b	protein_coding	NP_571523.1;XP_005161203.1	ZDB-GENE-991008-16	2.1739	4.75253	2.64371e-07	2.52866e-06	5.24163	4.16528	1573	605	15.5775	6.17412	26.3952	9.5833
30737	NM_001244600,NM_001244601,NM_131453,XM_005166786,XM_017357272,XM_021478178,XM_021478179,XM_021478180	elavl4	ELAV like neuron-specific RNA binding protein 4	protein_coding	NP_001231529.1;NP_001231530.1;NP_571528.2;XP_005166843.1;XP_017212761.1;XP_021333853.1;XP_021333854.1;XP_021333855.1	ZDB-GENE-990415-246	2.24767	5.86032	3.46024e-08	3.79849e-07	6.34552	5.19899	3430	1276	9.83156	3.85013	16.6591	5.97608
30742	NM_131457,XM_021476002	bmpr1ba	bone morphogenetic protein receptor, type IBa	protein_coding	NP_571532.1;XP_021331677.1	ZDB-GENE-991208-8	2.32893	3.1353	3.64207e-07	3.40916e-06	3.72247	2.64078	521	187	4.12363	1.3411	6.98728	2.08161
30746	NM_001346150,NM_001346150_dup1,XM_001334637	tie1	endothelium-specific receptor tyrosine kinase 1	protein_coding	NP_001333079.1;XP_001334673.5	ZDB-GENE-990415-55	3.36427	3.28292	5.64409e-13	1.12204e-11	3.99032	2.43951	636	158	1.56525	0.406919	1.84534	0.188126
30750	XM_694808	pparda	peroxisome proliferator-activated receptor delta a	protein_coding	XP_699900.6	ZDB-GENE-990415-212	-2.07516	1.9997	9.61911e-05	0.00053566	1.83828	2.66646	110	191	0.308132	0.5588	0.522113	0.867354
30767	NM_131479,XM_005163793,XM_005163794,XM_005163795,XM_005163796,XM_021469347	stat3	signal transducer and activator of transcription 3 (acute-phase response factor)	protein_coding	NP_571554.1;XP_005163850.2;XP_005163851.2;XP_005163852.2;XP_005163853.1;XP_021325022.1	ZDB-GENE-980526-68	2.34402	6.3185	5.54121e-09	6.9374e-08	6.81751	5.60556	4774	1703	13.7683	5.25556	23.3297	8.15753
57936	NM_131506,XM_021466746	tbx20	T-box 20	protein_coding	NP_571581.2;XP_021322421.1	ZDB-GENE-000427-7	3.86668	0.301053	1.86021e-06	1.52063e-05	1.51092	0.561752	79	17	0.194544	0.042839	0.329645	0.066493
58008	NM_212561	hey1	hes-related family bHLH transcription factor with YRPW motif 1	protein_coding	NP_997726.1	ZDB-GENE-000607-70	3.2667	4.50212	2.54187e-14	5.68756e-13	5.15325	3.53423	1477	378	6.92794	1.84365	11.739	2.86166
58023	NM_131511,NM_131511_dup1	fzd9b	frizzled class receptor 9b	protein_coding	NP_571586.1	ZDB-GENE-000906-4	2.63011	0.474568	0.000199275	0.00101534	1.54605	0.789181	82	26	0.719828	0.239118	1.14024	0.335094
58025	NM_131513	ccnb1	cyclin B1	protein_coding	NP_571588.1	ZDB-GENE-000406-10	-2.54391	3.42489	8.61432e-09	1.0455e-07	2.81588	4.03333	258	549	2.6692	5.91544	4.52281	9.18178
58028	NM_131516,NM_131516_dup1	pvalb2	parvalbumin 2	protein_coding	NP_571591.1	ZDB-GENE-000322-4	46.748	6.43315	3.7552e-98	1.88055e-95	7.40957	2.20554	7218	129	157.237	2.90473	264.731	4.475
58037	NM_131522,NM_131522_dup1	actn3a	actinin alpha 3a	protein_coding	NP_571597.1	ZDB-GENE-000329-9	36.4922	3.33953	1.66862e-57	2.38749e-55	4.35963	0.615481	834	19	4.04329	0.093667	6.85115	0.145387
58039	NM_131524,XM_005170070,XM_005170071,XM_005170072	dazl	deleted in azoospermia-like	protein_coding	NP_571599.1;XP_005170127.1;XP_005170128.1;XP_005170129.1	ZDB-GENE-000405-6	-2.14222	-0.745833	0.0335099	0.0806701	0.434294	0.812372	15	27	0.106901	0.1997	0.181138	0.309969
58042	NM_001115090	tbr1b	T-box, brain, 1b	protein_coding	NP_001108562.1	ZDB-GENE-000323-1	2.76567	0.937817	1.4427e-05	9.73822e-05	1.89388	0.985592	116	35	0.464202	0.142785	0.786566	0.221628
58045	NM_001328159,NM_131530,XM_005172774	hoxc6b	homeobox C6b	protein_coding	NP_001315088.1;NP_571605.2;XP_005172831.1	ZDB-GENE-000822-1	4.87033	-1.6752	0.0103994	0.030643	0.507414	0.116379	18	3	0.063018	0.010729	0.106781	0.016653
58052	NM_131537,NM_131537_dup1	hoxb5b	homeobox B5b	protein_coding	NP_571612.2	ZDB-GENE-000823-6	4.92778	-1.04341	0.000538084	0.00243335	0.767654	0.189057	30	5	0.278133	0.049497	0.471281	0.076828
58057	NM_001312866	pou4f1	POU class 4 homeobox 1	protein_coding	NP_001299795.1	ZDB-GENE-000523-2	2.84484	3.17172	4.53402e-10	6.51393e-09	3.83091	2.49789	565	166	3.20024	0.979276	5.42263	1.52001
58066	NM_131549	notch3	notch 3	protein_coding	NP_571624.2	ZDB-GENE-000329-5	-2.35021	4.77065	1.47581e-08	1.7159e-07	4.11058	5.29473	695	1366	1.3571	2.77935	2.29953	4.31403
58072	NM_131553,NM_131553_dup1	fzd8b	frizzled class receptor 8b	protein_coding	NP_571628.1	ZDB-GENE-000328-4	2.31181	0.907176	0.000320792	0.00154292	1.81926	1.06498	108	39	0.662248	0.2498	1.12214	0.387733
58082	NM_131563,NM_131563_dup1	tnnc2	troponin C type 2 (fast)	protein_coding	NP_571638.1	ZDB-GENE-000322-2	14.0308	5.01395	2.10373e-53	2.69803e-51	5.93445	2.40178	2569	153	27.1346	1.67927	45.9782	2.60651
58084	NM_131565,XM_005163151	tnnt3a	troponin T type 3a (skeletal, fast)	protein_coding	NP_571640.1;XP_005163208.3	ZDB-GENE-000322-3	26.7203	2.13713	7.50689e-37	5.57923e-35	3.21923	0.387406	355	11	4.6471	0.136388	7.87426	0.211697
58094	NM_131573,XM_017357715	dap1b	death associated protein 1b	protein_coding	NP_571648.1;XP_017213204.1	ZDB-GENE-000511-4	-2.88093	7.76278	3.68849e-13	7.48842e-12	6.81901	8.3372	4779	11513	98.0543	247.286	166.148	383.831
58097	NM_131576	myf5	myogenic factor 5	protein_coding	NP_571651.1	ZDB-GENE-000616-6	-8.92539	0.396218	5.3619e-13	1.071e-11	0.330654	1.73305	11	83	0.118674	0.937465	0.201087	1.45511
58109	NM_131586	valopa	vertebrate ancient long opsin a	protein_coding	NP_571661.1	ZDB-GENE-000427-4	-2.03244	0.438631	0.00523948	0.0173002	0.900271	1.46688	37	63	0.309614	0.542138	0.524625	0.841492
58114	NM_131591	actc1b	actin, alpha, cardiac muscle 1b	protein_coding	NP_571666.1	ZDB-GENE-000322-1	10.4711	8.3337	3.60779e-51	4.28716e-49	9.20417	5.83873	25146	2008	309.106	25.6912	523.763	39.8772
58122	NM_131599	mcl1a	MCL1, BCL2 family apoptosis regulator a	protein_coding	NP_571674.1	ZDB-GENE-000511-7	-3.08257	7.96289	1.20399e-14	2.78281e-13	6.94499	8.56122	5219	13453	65.2338	175.111	110.535	271.803
58128	NM_131605	fabp7a	fatty acid binding protein 7, brain, a	protein_coding	NP_571680.1	ZDB-GENE-000627-1	3.81643	7.55278	1.18018e-19	4.03622e-18	8.22129	6.30257	12702	2783	285.947	65.2294	484.522	101.247
58133	NM_001351718,NM_001351718_dup1,NM_199210,NM_199210_dup1,NM_199210_dup2	ngfb	nerve growth factor b (beta polypeptide)	protein_coding	NP_954680.2	ZDB-GENE-000629-2	2.17003	4.42381	4.11511e-07	3.80788e-06	4.92097	3.85776	1251	482	16.3497	6.62106	11.8473	3.8399
58134	NM_131610,XM_021469375	adarb1a	adenosine deaminase, RNA-specific, B1a	protein_coding	NP_571685.2;XP_021325050.1	ZDB-GENE-000627-2	2.32053	5.30708	1.44078e-08	1.67889e-07	5.81352	4.63245	2359	850	6.11716	2.2877	10.3652	3.5509
58137	NM_001328413,NM_131613,XM_005168991,XM_005168994,XM_005168996,XM_005168997,XM_005168998,XM_005168999,XM_009303327,XM_009303328,XM_009303329,XM_009303331,XM_009303332,XM_009303333,XM_009303334,XM_009303335,XM_009303336,XM_009303337,XM_009303338,XM_021477595,XM_021477597,XM_021477598	celf1	cugbp, Elav-like family member 1	protein_coding	NP_001315342.1;NP_571688.1;XP_005169048.1;XP_005169051.1;XP_005169053.1;XP_005169054.1;XP_005169055.1;XP_005169056.1;XP_009301602.1;XP_009301603.1;XP_009301604.1;XP_009301606.1;XP_009301607.1;XP_009301608.1;XP_009301609.1;XP_009301610.1;XP_009301611.1;XP_009301612.1;XP_009301613.1;XP_021333270.1;XP_021333272.1;XP_021333273.1	ZDB-GENE-000501-1	-2.73442	7.83184	4.39137e-12	8.03162e-11	6.94252	8.38632	5210	11913	13.9305	30.1982	23.6045	46.8728
58138	NM_131614,NM_131615,XM_017358962	pbx1a	pre-B-cell leukemia homeobox 1a	protein_coding	NP_571689.1;NP_571690.1;XP_017214451.1	ZDB-GENE-000405-1	2.4727	3.22633	4.26225e-08	4.59497e-07	3.83091	2.66646	565	191	3.49656	1.15266	5.92474	1.78913
58142	NM_001115089,NM_001130666	myhz1.1	myosin, heavy polypeptide 1.1, skeletal muscle	protein_coding	NP_001108561.1;NP_001124138.2	ZDB-GENE-000322-5	5.54612	8.05323	4.11254e-30	2.40275e-28	8.81683	6.35977	19215	2897	49.5185	7.77341	83.9064	12.0657
58143	NM_131619	mylz3	myosin, light polypeptide 3, skeletal muscle	protein_coding	NP_571694.1	ZDB-GENE-000322-6	6.71776	6.86257	1.34716e-35	9.50834e-34	7.66844	4.96032	8645	1076	138.752	17.9807	235.107	27.9092
58149	NM_131625,NM_131625_dup1	pdp2	putative pyruvate dehydrogenase phosphatase isoenzyme 2	protein_coding	NP_571700.1	ZDB-GENE-000921-2	-9.76676	-0.323089	1.89442e-09	2.52345e-08	0.189666	1.26314	6	50	0.047968	0.457573	0.081279	0.710232
58151	NM_131627,NM_131627_dup1	cxcl14	chemokine (C-X-C motif) ligand 14	protein_coding	NP_571702.1	ZDB-GENE-000619-1	-2.74718	5.73592	8.35222e-12	1.47129e-10	4.87911	6.30564	1214	2789	10.8681	26.0147	13.9708	6.53409
58153	NM_131629	slc40a1	solute carrier family 40 (iron-regulated transporter), member 1	protein_coding	NP_571704.1	ZDB-GENE-000511-8	-2.14116	6.43893	1.63382e-07	1.59907e-06	5.81292	6.89762	2358	4222	9.71795	18.1226	16.4666	28.1294
58215	NM_131631,XM_021468899	fech	ferrochelatase	protein_coding	NP_571706.1;XP_021324574.1	ZDB-GENE-000928-1	-3.32735	-0.321353	0.000218753	0.00110073	0.434294	1.12178	15	42	0.0613	0.183826	0.103869	0.28533
64260	NM_001025189,NM_001025189_dup1,XM_021469376	vtg5	vitellogenin 5	protein_coding	NP_001020360.2;XP_021325051.1	ZDB-GENE-001201-4	-211.086	10.447	8.01247e-171	4.21316e-167	3.82377	11.4407	562	99223	2.06231	379.964	1.58092	196.025
64265	NM_001278796	aox5	aldehyde oxidase 5	protein_coding	NP_001265725.1	ZDB-GENE-001205-2	2.03749	-0.273679	0.0236259	0.0606374	1.02172	0.588867	44	18	0.168572	0.070428	0.285636	0.109316
64279	NM_131676	psmb12	proteasome subunit beta 12	protein_coding	NP_571751.1	ZDB-GENE-001208-1	-5.80433	3.62016	4.04063e-25	1.90553e-23	2.20357	4.45593	154	748	2.78052	14.1391	4.71145	21.9463
64603	NM_131679,XM_005159319,XM_005159321	eomesa	eomesodermin homolog a	protein_coding	NP_571754.3;XP_005159376.1;XP_005159378.1	ZDB-GENE-001228-1	2.109	1.44448	0.000344884	0.00164414	2.20357	1.43734	154	61	0.801124	0.331942	1.35746	0.515232
64605	NM_131681,NR_131978	htatip2	HIV-1 Tat interactive protein 2	protein_coding	NP_571756.1	ZDB-GENE-001219-1	3.51548	3.73265	1.09662e-14	2.55712e-13	4.43184	2.77668	879	209	6.00295	2.78531	10.1717	4.32328
64609	NM_131683,NM_131683_dup1,NM_131683_dup2	atp1a2a	ATPase, Na+/K+ transporting, alpha 2a polypeptide	protein_coding	NP_571758.1	ZDB-GENE-001212-6	5.12654	0.0291217	4.66057e-07	4.2806e-06	1.37425	0.387406	68	11	0.268545	0.043723	0.455035	0.063685
64674	NM_131693,NR_102288,XM_017353192,XM_017353193	mibp	muscle-specific beta 1 integrin binding protein	protein_coding	NP_571768.2;XP_017208681.1;XP_017208682.1	ZDB-GENE-030404-1	-2.92513	5.80635	4.25599e-13	8.58257e-12	4.88255	6.3986	1217	2977	12.3992	31.9993	21.0098	49.6684
64692	NM_131696	zp3b	zona pellucida glycoprotein 3b	protein_coding	NP_571771.1	ZDB-GENE-031124-2	-12.4619	4.13149	3.83812e-46	3.99639e-44	1.8477	5.06299	111	1158	0.988228	10.7618	1.6745	16.7041
64812	NM_131702	sox19b	SRY (sex determining region Y)-box 19b	protein_coding	NP_571777.1	ZDB-GENE-010111-1	-3.88253	2.46438	1.2001e-13	2.52417e-12	1.69955	3.2835	96	312	0.578602	1.96347	0.98041	3.04765
65223	NM_131708	try	trypsin	protein_coding	NP_571783.2	ZDB-GENE-010131-7	-12.9827	6.4038	2.86947e-56	3.97063e-54	3.7122	7.30572	517	5614	9.35967	105.894	15.8595	164.365
65231	NM_131716	mdkb	midkine b	protein_coding	NP_571791.1	ZDB-GENE-010131-6	3.28498	7.87227	4.55454e-16	1.20649e-14	8.49242	6.78563	15337	3904	236.357	62.6401	400.495	97.2283
65234	NM_131719	cdk5	cyclin-dependent kinase 5	protein_coding	NP_571794.1	ZDB-GENE-010131-2	-2.09173	2.35219	3.3053e-05	0.000204291	2.09705	2.97469	140	245	0.751572	1.37214	1.2735	2.12979
65235	NM_131720,NM_131720_dup1	six5	SIX homeobox 5	protein_coding	NP_571795.1	ZDB-GENE-010201-3	-2.72965	-0.351333	0.00191784	0.00727858	0.48345	1.06498	17	39	0.101612	0.256253	0.172176	0.397749
79079	NM_131725,XM_009297761	cpeb1a	cytoplasmic polyadenylation element binding protein 1a	protein_coding	NP_571800.1;XP_009296036.1	ZDB-GENE-080723-42	-3.88927	5.19861	6.15581e-19	1.98277e-17	4.00091	5.89209	641	2085	3.905	13.232	6.61681	20.5384
79378	NM_213162	agxtb	alanine-glyoxylate aminotransferase b	protein_coding	NP_998327.1	ZDB-GENE-010302-3	-9.20476	3.24308	1.606e-33	1.04904e-31	1.51092	4.17426	79	609	0.777253	6.26401	1.31701	9.72283
81538	NM_198073	hbbe1.1	hemoglobin beta embryonic-1.1	protein_coding	NP_932339.1	ZDB-GENE-030616-7	164.672	3.26804	2.887e-70	5.78308e-68	4.31958	0.153175	810	4	21.509	0.102166	36.4459	0.15858
81582	NM_131764	cldnc	claudin c	protein_coding	NP_571839.1	ZDB-GENE-010328-3	-3.8836	0.8539	1.73267e-08	1.98601e-07	0.787362	1.93673	31	101	0.258059	0.882084	0.437267	1.36915
81583	NM_180964	cldnd	claudin d	protein_coding	NP_851295.1	ZDB-GENE-010328-4	-97.2731	2.82096	1.2887e-61	2.10119e-59	0.189666	3.90437	6	499	0.112122	10.6387	0.189984	16.5131
81585	NM_131766	cldnf	claudin f	protein_coding	NP_571841.2	ZDB-GENE-010328-6	2.00512	1.48559	0.00076887	0.00331998	2.21816	1.49581	156	65	1.34288	0.583086	2.27544	0.90505
81587	NM_131767	cldnh	claudin h	protein_coding	NP_571842.1	ZDB-GENE-010328-8	3.40968	2.42958	3.18023e-11	5.23805e-10	3.20465	1.76906	351	86	2.91985	0.741136	4.94753	1.15037
81591	NM_131771	cldn15la	claudin 15-like a	protein_coding	NP_571846.2	ZDB-GENE-010328-12	-2.60622	2.95629	1.30857e-08	1.53932e-07	2.40197	3.60566	183	399	3.0238	6.87428	5.12367	10.6701
83413	NM_131782,NM_131782_dup1,XM_005169598	glra4a	glycine receptor, alpha 4a	protein_coding	NP_571857.1;XP_005169655.1	ZDB-GENE-010410-3	2.32111	2.08892	6.07631e-06	4.48589e-05	2.77698	1.81571	250	90	1.61441	0.632447	2.30031	0.520497
83415	NM_131783,NM_131783_dup1	six2a	SIX homeobox 2a	protein_coding	NP_571858.1	ZDB-GENE-010412-1	3.43065	0.753924	7.28172e-07	6.4514e-06	1.80965	0.789181	107	26	1.02176	0.257482	1.73132	0.399656
83776	NM_131788,XM_005155405	cry5	cryptochrome circadian clock 5	protein_coding	NP_571863.1;XP_005155462.1	ZDB-GENE-010426-8	2.49201	2.45901	3.73634e-07	3.48963e-06	3.12943	2.03858	331	111	2.33493	0.859051	3.95641	1.3334
83908	NM_199523	ucp1	uncoupling protein 1	protein_coding	NP_955817.1	ZDB-GENE-010503-1	-2.71789	4.50263	6.88204e-11	1.0941e-09	3.71991	5.09171	520	1182	3.2538	7.7027	5.5134	11.9559
84037	NM_131797	twsg1a	twisted gastrulation BMP signaling modulator 1a	protein_coding	NP_571872.2	ZDB-GENE-010509-2	-2.15189	3.06011	3.70421e-06	2.86331e-05	2.64818	3.62544	225	405	0.9089	1.70786	1.54008	2.65089
84039	NM_001328495	bco1	beta-carotene oxygenase 1	protein_coding	NP_001315424.1	ZDB-GENE-010508-1	-2.61429	1.86106	7.2411e-07	6.42083e-06	1.58035	2.63428	85	186	0.730192	1.67497	1.23727	2.59984
84702	NM_131802	cp	ceruloplasmin	protein_coding	NP_571877.1	ZDB-GENE-010522-1	-3.76249	4.21707	5.77521e-17	1.63266e-15	3.13713	4.92352	333	1048	1.5377	5.0521	2.60555	7.84173
114367	NM_131804	nots	nothepsin	protein_coding	NP_571879.1	ZDB-GENE-010620-1	-5.87801	4.42277	6.93951e-28	3.67654e-26	2.85376	5.23376	266	1308	4.28915	22.0369	7.26773	34.205
114378	NM_131806	efnb3b	ephrin-B3b	protein_coding	NP_571881.1	ZDB-GENE-010618-3	-3.87818	-0.579226	0.000205848	0.00104506	0.330654	1.00585	11	36	0.165057	0.566758	0.27968	0.879706
114401	NM_131807,XM_005162026	bcl2l1	bcl2-like 1	protein_coding	NP_571882.1;XP_005162083.1	ZDB-GENE-010730-1	-3.08048	5.02743	1.15964e-13	2.44395e-12	4.08493	5.64968	682	1757	4.48815	12.0924	7.60493	18.7695
114402	NM_131808	efnb2b	ephrin-B2b	protein_coding	NP_571883.1	ZDB-GENE-010618-1	-2.77031	-0.803525	0.00916578	0.0276949	0.35727	0.835197	12	28	0.173497	0.444579	0.293982	0.690064
114403	NM_131809	gja8b	gap junction protein alpha 8 paralog b	protein_coding	NP_571884.2	ZDB-GENE-010607-3	-2.71917	2.80763	5.72492e-09	7.14083e-08	2.24691	3.48456	160	364	1.0457	2.48987	1.77189	3.86471
114404	NM_131810,NM_131810_dup1,XM_005166218,XM_021476749	cx44.2	connexin 44.2	protein_coding	NP_571885.2;XP_005166275.1;XP_021332424.1	ZDB-GENE-010619-1	-2.35285	3.61864	7.70652e-08	8.02432e-07	3.05415	4.18541	312	614	2.37593	4.81217	4.02589	7.46932
114405	NM_131811	cx27.5	connexin 27.5	protein_coding	NP_571886.1	ZDB-GENE-010619-2	-3.1219	0.746317	2.61205e-06	2.09054e-05	0.844921	1.80419	34	89	0.382605	1.04296	0.648304	1.61886
114407	NM_131813	angpt1	angiopoietin 1	protein_coding	NP_571888.1	ZDB-GENE-010817-1	4.48274	-0.717577	0.000184687	0.000949066	0.918259	0.258248	38	7	0.361898	0.069982	0.613218	0.108624
114410	NM_001002682	casq2	calsequestrin 2	protein_coding	NP_001002682.1	ZDB-GENE-010724-12	2.54748	1.60905	5.40948e-06	4.03324e-05	2.40197	1.42235	183	60	1.01941	0.344613	1.72734	0.5349
114414	NM_131816,XM_017353799	neurod6a	neuronal differentiation 6a	protein_coding	NP_571891.3;XP_017209288.1	ZDB-GENE-010608-1	3.05632	0.519779	2.28106e-05	0.000146362	1.61385	0.741649	88	24	0.492493	0.135939	0.834504	0.211001
114415	NM_001309843,NM_001309844,NM_131817,NR_132274	neurod6b	neuronal differentiation 6b	protein_coding	NP_001296772.1;NP_001296773.1;NP_571892.3	ZDB-GENE-010608-2	4.43368	0.283278	3.22939e-07	3.04864e-06	1.52272	0.505946	80	15	0.750297	0.134042	1.27134	0.208057
114417	NM_194361,NM_194361_dup1,NM_194361_dup2,XM_017357587,XM_017357591,XM_017357594	mpz	myelin protein zero	protein_coding	NP_919342.1	ZDB-GENE-010724-4	-4.9728	5.09987	6.74369e-25	3.14501e-23	3.64087	5.85975	490	2038	2.5602	13.7627	1.91705	11.59
114418	NM_173231	crybb1	crystallin, beta B1	protein_coding	NP_775338.2	ZDB-GENE-010813-1	-23.5397	11.1804	1.89692e-82	5.9549e-80	7.57089	12.1207	8077	158990	134.087	2748.38	227.203	4265.96
114421	NM_131818,XM_021476750,XM_021476751	angptl3	angiopoietin-like 3	protein_coding	NP_571893.2;XP_021332425.1;XP_021332426.1	ZDB-GENE-010817-3	7.07957	3.26243	2.70481e-27	1.39096e-25	4.14345	1.74515	712	84	3.64467	0.3525	6.17571	0.547141
114425	NM_131709,NM_131709_dup1,XM_021480009	zeb1b	zinc finger E-box binding homeobox 1b	protein_coding	NP_571784.1	ZDB-GENE-010621-1	2.21776	4.88878	1.16996e-07	1.18193e-06	5.38353	4.27578	1740	656	4.48717	1.93105	3.43035	2.79043
114430	NM_131823	irx1b	iroquois homeobox 1b	protein_coding	NP_571898.1	ZDB-GENE-010716-1	3.69938	0.330484	2.69963e-06	2.14837e-05	1.52272	0.588867	80	18	0.704677	0.159046	1.19404	0.246867
114438	NM_131827	zp2.2	zona pellucida glycoprotein 2, tandem duplicate 2	protein_coding	NP_571902.1	ZDB-GENE-010622-1	-30.1581	4.88776	1.52968e-74	3.53557e-72	1.53443	5.86531	81	2046	0.959618	25.5185	1.62602	39.6092
114439	NM_131828	zp2.3	zona pellucida glycoprotein 2, tandem duplicate 3	protein_coding	NP_571903.2	ZDB-GENE-010622-2	-56.5122	5.69892	8.80085e-99	4.62771e-96	1.48701	6.68752	77	3645	0.872815	43.4719	1.47894	67.4759
114440	NM_131829	zp2.6	zona pellucida glycoprotein 2, tandem duplicate 6	protein_coding	NP_571904.2	ZDB-GENE-090306-2	-37.4678	4.68588	7.7805e-78	1.9957e-75	1.22327	5.676	57	1790	0.643498	21.3423	1.09037	33.127
114444	NM_131832	etv6	ets variant 6	protein_coding	NP_571907.2	ZDB-GENE-010727-1	-2.40938	1.20995	3.94436e-05	0.000239843	1.22327	2.07738	57	115	2.96555	6.2337	5.02497	9.67577
114452	NM_001144803,XM_021476915	blzf1	basic leucine zipper nuclear factor 1	protein_coding	NP_001138275.1;XP_021332590.1	ZDB-GENE-010724-1	-2.25477	5.01574	5.39538e-08	5.74297e-07	4.38248	5.51657	848	1599	4.53117	8.79023	7.67783	13.644
116993	NM_001326557,XM_021475988	vcana	versican a	protein_coding	NP_001313486.1;XP_021331663.1	ZDB-GENE-011023-1	2.19833	0.0690432	0.00868047	0.0264795	1.23767	0.692498	58	22	0.031565	0.012288	0.053485	0.019072
117234	NM_152975	mab21l2	mab-21-like 2	protein_coding	NP_694507.1	ZDB-GENE-011101-3	2.18753	3.35054	1.62103e-06	1.33969e-05	3.89816	2.87908	594	227	5.06468	2.01184	8.58184	3.12271
117508	NM_131856,NM_131856_dup1,NM_131856_dup2	klf2a	Kruppel-like factor 2a	protein_coding	NP_571931.2	ZDB-GENE-011109-1	-4.44796	5.49585	1.61457e-22	6.59404e-21	4.13386	6.22206	707	2630	5.07483	19.4529	7.35088	30.1943
117509	NM_131857,XM_005163607	klf2b	Kruppel-like factor 2b	protein_coding	NP_571932.1;XP_005163664.1	ZDB-GENE-011109-2	-6.73508	5.34982	1.35316e-33	8.92192e-32	3.52826	6.16971	450	2535	1.92682	11.2626	3.26489	17.4814
118437	NM_131860	gpc4	glypican 4	protein_coding	NP_571935.2	ZDB-GENE-011119-1	-2.05775	2.05513	9.73159e-05	0.00054135	1.88476	2.71033	115	198	0.97223	1.7459	1.64739	2.70994
140423	NM_131863	jag1b	jagged 1b	protein_coding	NP_571938.2	ZDB-GENE-011128-4	-2.06662	5.23104	9.30978e-07	8.07142e-06	4.67075	5.68859	1045	1806	2.3963	4.31191	4.06041	6.69283
140427	NM_131867	hsf2	heat shock transcription factor 2	protein_coding	NP_571942.1	ZDB-GENE-011128-1	2.16032	4.65301	3.53264e-07	3.30966e-06	5.14182	4.07708	1465	567	11.1059	4.46883	18.8183	6.9364
140505	rna75409	mt-rnr1	s-rRNA	rRNA	.	ZDB-GENE-011205-3	2.03863	12.1051	6.45451e-07	5.77201e-06	12.5295	11.5022	252439	103545	4107.12	1754.19	6959.29	2722.81
140507	rna75410	trnV	tRNA-Val	tRNA	.	ZDB-GENE-011205-5	2.36063	-0.134046	0.00525818	0.0173483	1.13373	0.588867	51	18	11.0329	4.05738	18.6947	6.29775
140513	rna75419	trnC	tRNA-Cys	tRNA	.	ZDB-GENE-011205-27	2.17035	2.47836	1.2412e-05	8.48981e-05	3.09426	2.16106	322	124	69.269	27.6577	117.373	42.9295
140514	rna75420	trnY	tRNA-Tyr	tRNA	.	ZDB-GENE-011205-28	2.67068	3.57846	1.17179e-09	1.60145e-08	4.19231	2.90088	738	231	160.885	52.3806	272.611	81.3038
140599	NM_131872,XM_021470110	vim	vimentin	protein_coding	NP_571947.1;XP_021325785.1	ZDB-GENE-011212-3	-2.38848	8.71907	1.56557e-09	2.10946e-08	7.9641	9.21684	10621	21213	91.3658	189.982	154.814	294.885
140615	NM_131645	fads2	fatty acid desaturase 2	protein_coding	NP_571720.2	ZDB-GENE-011212-1	-2.26821	5.86386	2.34733e-08	2.63174e-07	5.19443	6.35386	1521	2885	14.1406	27.9259	23.9605	43.3459
140616	NM_131875	sox10	SRY (sex determining region Y)-box 10	protein_coding	NP_571950.1	ZDB-GENE-011207-1	2.02933	3.81403	6.46742e-06	4.7331e-05	4.30427	3.35631	801	330	3.87405	1.65975	6.56438	2.57622
140619	NM_131876	admp	anti-dorsalizing morphogenic protein	protein_coding	NP_571951.2	ZDB-GENE-011214-1	4.32091	2.50332	5.32221e-15	1.28817e-13	3.33423	1.63239	388	75	3.22333	0.640972	5.46177	0.9949
140634	NM_131879	cyp1a	cytochrome P450, family 1, subfamily A	protein_coding	NP_571954.1	ZDB-GENE-011219-1	-3.16492	2.64946	6.90594e-11	1.09707e-09	1.99904	3.39139	128	339	0.758484	2.09588	1.28521	3.25317
140747	NM_131882	cxcr4a	chemokine (C-X-C motif) receptor 4a	protein_coding	NP_571957.2	ZDB-GENE-020102-1	2.7817	0.983069	9.49992e-06	6.68938e-05	1.92979	1.00585	120	36	1.21938	0.377641	2.06617	0.586164
140819	NM_001311348,XM_021476760,XM_021476761,XM_021476762,XM_021476763,XM_021476764,XM_021476765,XM_021476766,XM_021476767,XM_021476768,XM_021476769,XM_021476770,XM_021476771,XM_021476772,XM_021476773	ptprfa	protein tyrosine phosphatase, receptor type, f, a	protein_coding	NP_001298277.1;XP_021332435.1;XP_021332436.1;XP_021332437.1;XP_021332438.1;XP_021332439.1;XP_021332440.1;XP_021332441.1;XP_021332442.1;XP_021332443.1;XP_021332444.1;XP_021332445.1;XP_021332446.1;XP_021332447.1;XP_021332448.1	ZDB-GENE-020107-2	2.18379	6.27286	8.56444e-08	8.8432e-07	6.74125	5.63024	4526	1733	8.23246	3.63079	13.9495	5.63561
170450	NM_131894,NM_131894_dup1,NM_131894_dup2,XM_005170896,XM_005170897,XM_005170898	gria2a	glutamate receptor, ionotropic, AMPA 2a	protein_coding	NP_571969.1;XP_005170953.1;XP_005170954.1;XP_005170955.1	ZDB-GENE-020125-3	2.42653	5.38255	2.37206e-09	3.10464e-08	5.90657	4.66147	2519	868	9.03504	3.39972	12.136	3.74088
170581	NM_131900,XM_009300335,XM_021474904,XM_021474905,XM_021474906,XM_021474907,XM_021474908,XM_021474909,XM_021474910,XM_021474911,XM_021474912,XM_021474913,XM_021474914,XM_021474915,XM_021474916,XM_021474917,XM_021474918,XM_021474919,XM_021474920,XM_021474921,XM_021474922	cacna1c	calcium channel, voltage-dependent, L type, alpha 1C subunit	protein_coding	NP_571975.1;XP_009298610.1;XP_021330579.1;XP_021330580.1;XP_021330581.1;XP_021330582.1;XP_021330583.1;XP_021330584.1;XP_021330585.1;XP_021330586.1;XP_021330587.1;XP_021330588.1;XP_021330589.1;XP_021330590.1;XP_021330591.1;XP_021330592.1;XP_021330593.1;XP_021330594.1;XP_021330595.1;XP_021330596.1;XP_021330597.1	ZDB-GENE-020129-1	2.81016	5.84764	2.95063e-12	5.48723e-11	6.42355	4.96291	3623	1078	4.30291	1.33253	7.29105	2.06831
171473	NM_199481,NM_199481_dup1,XM_021480960	ccng1	cyclin G1	protein_coding	NP_955775.1	ZDB-GENE-020322-1	-3.51317	8.13056	1.05792e-17	3.15621e-16	6.96784	8.77237	5303	15579	42.3124	129.47	71.6961	200.96
171481	NM_152960	fabp10a	fatty acid binding protein 10a, liver basic	protein_coding	NP_694492.1	ZDB-GENE-020318-1	-7.08131	4.70828	1.57071e-33	1.02918e-31	2.89975	5.548	276	1635	9.68431	59.7922	16.4096	92.8078
192317	NM_173244,NM_173244_dup1,NM_173244_dup2,XM_017353103	stil	scl/tal1 interrupting locus	protein_coding	NP_775351.2	ZDB-GENE-020419-39	-2.52825	-0.507317	0.005121	0.0169515	0.459082	0.965043	16	34	0.049708	0.11072	0.075726	0.111889
192333	NM_212569	mcm7	minichromosome maintenance complex component 7	protein_coding	NP_997734.1	ZDB-GENE-020419-27	2.61093	4.39614	5.10031e-10	7.30257e-09	4.9703	3.65781	1296	415	9.6809	3.2233	16.4038	5.00312
245949	NM_153674	vangl2	VANGL planar cell polarity protein 2	protein_coding	NP_705960.1	ZDB-GENE-020507-3	-3.16449	1.92147	2.50493e-09	3.27447e-08	1.48701	2.7469	77	204	0.568517	1.56678	0.963323	2.43192
246090	NM_152952	cygb1	cytoglobin 1	protein_coding	NP_694484.1	ZDB-GENE-020513-1	-3.27145	5.65513	1.90933e-15	4.75818e-14	4.61945	6.28817	1007	2755	2.98705	8.51475	5.06141	13.2164
246092	NM_199271	cpa5	carboxypeptidase A5	protein_coding	NP_954965.1	ZDB-GENE-020514-1	-11.1342	4.99979	2.30566e-47	2.44924e-45	2.64818	5.89955	225	2096	2.5781	25.0476	4.36846	38.8782
246095	NM_144764	gpib	glucose-6-phosphate isomerase b	protein_coding	NP_658910.2	ZDB-GENE-020513-3	2.27514	1.9541	1.70505e-05	0.000112881	2.65356	1.73305	226	83	1.82199	0.694943	3.08726	1.07867
246275	NM_152982,XM_005171786	myhz2	myosin, heavy polypeptide 2, fast muscle specific	protein_coding	NP_694514.2;XP_005171843.1	ZDB-GENE-020604-1	6.95901	5.93985	2.77007e-35	1.93565e-33	6.75758	4.0358	4578	550	11.7178	1.46356	19.8551	2.2717
252850	NM_173226	thbs4b	thrombospondin 4b	protein_coding	NP_775333.1	ZDB-GENE-020708-4	4.3507	4.25654	5.03094e-20	1.78743e-18	4.99805	3.02022	1322	254	6.04359	1.20557	10.2406	1.87125
259189	NM_152966,NM_152966_dup1,NM_152966_dup2	hgd	homogentisate 1,2-dioxygenase	protein_coding	NP_694498.2	ZDB-GENE-020802-5	-2.49678	1.19495	2.80496e-05	0.000176531	1.19403	2.07738	55	115	0.536058	1.9824	0.908322	2.5359
259250	NM_153670,XM_021469300	cers4a	ceramide synthase 4a	protein_coding	NP_705956.1;XP_021324975.1	ZDB-GENE-020808-1	-2.05952	2.86274	1.86737e-05	0.000122166	2.51858	3.42563	202	348	1.66982	3.0437	2.82942	4.72436
259251	NM_153671	cers2a	ceramide synthase 2a	protein_coding	NP_705957.1	ZDB-GENE-020808-2	-3.58102	1.52412	1.07329e-09	1.47257e-08	1.1642	2.44694	53	159	0.414042	1.31089	0.701573	2.03472
259304	NM_153672,NM_153672_dup1	twsg1b	twisted gastrulation BMP signaling modulator 1b	protein_coding	NP_705958.1	ZDB-GENE-020812-3	3.47127	-0.400711	0.000425204	0.00197033	1.05462	0.387406	46	11	1.12436	0.292805	1.90517	0.419758
259306	NM_152954	cyp2ad2	cytochrome P450, family 2, subfamily AD, polypeptide 2	protein_coding	NP_694486.1	ZDB-GENE-020812-2	-4.16139	3.3307	2.73436e-17	7.93268e-16	2.289	4.10317	166	578	1.35508	4.93166	2.29612	7.6548
260407	NM_152248,NM_152248_dup1,NM_152986,NM_152986_dup1,NM_152987,NM_152987_dup1	tp63	tumor protein p63	protein_coding	NP_689454.1;NP_694518.1;NP_694519.1	ZDB-GENE-030819-1	-2.51599	5.05551	7.57291e-10	1.05905e-08	4.3145	5.6014	807	1698	4.30233	9.67525	7.24656	14.6028
260440	NM_001007029	atp2a1	ATPase, Ca++ transporting, cardiac muscle, fast twitch 1	protein_coding	NP_001007030.1	ZDB-GENE-020905-1	2.95717	6.66652	1.55412e-13	3.24285e-12	7.25471	5.70881	6479	1832	33.6719	9.91354	57.0553	15.3875
266754	NM_194364	adra2da	adrenergic, alpha-2D-, receptor a	protein_coding	NP_919345.2	ZDB-GENE-021010-4	-2.0999	-0.312059	0.0207928	0.0545238	0.577005	1.02583	21	37	0.111421	0.208266	0.188797	0.323265
282554	NM_183067,NM_183067_dup1,XM_005162673,XM_021470111	drd3	dopamine receptor D3	protein_coding	NP_898890.1	ZDB-GENE-021119-1	-4.07528	1.79842	4.42795e-12	8.0915e-11	1.23767	2.71033	58	198	0.402876	1.56608	0.39301	1.11354
282672	NM_213132,NM_213132_dup1	fbp1b	fructose-1,6-bisphosphatase 1b	protein_coding	NP_998297.1	ZDB-GENE-021206-11	-8.82237	2.47257	1.92549e-27	9.99973e-26	1.08678	3.45171	48	355	0.545426	4.23349	0.824755	6.5157
286739	NM_001004296,NM_001004296_dup1,XM_009301281,XM_009301282	msna	moesin a	protein_coding	NP_001004296.1;XP_009299556.1;XP_009299557.1	ZDB-GENE-021211-2	-4.65109	7.21369	7.24517e-25	3.36397e-23	5.7421	7.93842	2243	8724	9.77436	39.6606	16.5621	61.56
286748	NM_201294,XM_009296510	b3gnt7	UDP-GlcNAc:betaGal beta-1,3-N-acetylglucosaminyltransferase 7	protein_coding	NP_958451.1;XP_009294785.1	ZDB-GENE-021210-4	4.48901	0.2973	2.36033e-07	2.27416e-06	1.53443	0.505946	81	15	0.604165	0.113887	1.02373	0.176773
286830	NM_173275	lamb1a	laminin, beta 1a	protein_coding	NP_775382.1	ZDB-GENE-021226-1	2.36057	3.42654	1.24741e-07	1.25595e-06	4.00091	2.87908	641	227	1.85194	0.682585	3.13801	1.05949
286831	NM_173276	lamb4	laminin, beta 4	protein_coding	NP_775383.1	ZDB-GENE-021226-2	-2.74964	2.55414	9.11966e-09	1.09985e-07	2.04069	3.25838	133	306	0.34638	0.831824	0.586923	1.29114
286834	NM_173279,XM_005159581	mc5ra	melanocortin 5a receptor	protein_coding	NP_775386.1;XP_005159638.1	ZDB-GENE-021223-3	-12.5997	-0.248009	6.52968e-11	1.04123e-09	0.159737	1.32895	5	54	0.079983	0.331765	0.135527	0.514957
317643	NM_173287	chrnb3b	cholinergic receptor, nicotinic, beta 3b (neuronal)	protein_coding	NP_775394.1	ZDB-GENE-030102-4	3.74934	3.79833	4.8265e-16	1.27693e-14	4.51398	2.77078	933	208	10.4019	2.41346	17.6254	3.7461
317733	NM_174862,XM_005156971,XM_005156972,XM_005156973	esr2b	estrogen receptor 2b	protein_coding	NP_777287.2;XP_005157028.1;XP_005157029.1;XP_005157030.1	ZDB-GENE-030116-1	-2.50725	1.06422	3.68167e-05	0.000225172	1.11825	1.97833	50	105	0.224455	0.567853	0.380326	0.881405
317736	NM_001005390	alkbh6	alkB homolog 6	protein_coding	NP_001005390.1	ZDB-GENE-060407-1	-2.0263	2.19351	9.99915e-05	0.000553744	1.99904	2.82309	128	217	1.37087	2.42021	2.32287	3.75658
317744	NM_001025450,NM_001025450_dup1,XM_005162028,XM_009296716,XM_009296717	dnmt3bb.1	DNA (cytosine-5-)-methyltransferase 3 beta, duplicate b.1	protein_coding	NP_001020621.1	ZDB-GENE-050314-1	2.42682	2.1955	1.6715e-06	1.37815e-05	2.88611	1.8609	273	94	1.09694	0.386313	0.806739	0.321417
321031	NM_001004109	quo	quattro	protein_coding	NP_001004109.1	ZDB-GENE-030131-9944	-2.21587	4.66753	1.39304e-07	1.38861e-06	4.06891	5.16898	674	1249	1.61566	3.11843	2.73764	4.84035
321035	NM_201296,NM_201296_dup1,XM_021467109	pabpc4	poly(A) binding protein, cytoplasmic 4 (inducible form)	protein_coding	NP_958453.1;XP_021322784.1	ZDB-GENE-030131-9663	-14.1167	6.65703	1.35751e-59	2.05413e-57	3.84273	7.56578	570	6730	3.60244	43.8274	2.78873	56.7748
321046	NM_131242	c3a.1	complement component c3a, duplicate 1	protein_coding	NP_571317.1	ZDB-GENE-990415-35	-15.9722	5.12144	1.90923e-58	2.80818e-56	2.34991	6.05529	175	2339	0.534337	7.44351	0.905405	11.5536
321053	NM_001100137	mybphb	myosin binding protein Hb	protein_coding	NP_001093607.1	ZDB-GENE-030131-9794	6.69415	4.61121	2.53549e-31	1.55933e-29	5.4391	2.87358	1810	226	16.179	2.09846	27.4145	3.25718
321056	NM_198871	zgc:63569	zgc:63569	protein_coding	NP_942572.1	ZDB-GENE-030131-9816	-5.81973	2.66375	2.51304e-21	9.69848e-20	1.51092	3.55844	79	385	0.609126	3.09999	1.03213	4.81172
321064	NM_198979	klhl41b	kelch-like family member 41b	protein_coding	NP_945330.1	ZDB-GENE-030131-9875	3.1002	1.31297	2.46516e-07	2.36864e-06	2.21816	1.12178	156	42	1.05876	0.29326	1.79401	0.45519
321084	NM_001020476,XM_005166992,XM_005166993,XM_005166994,XM_005166996	dnmt3ba	DNA (cytosine-5-)-methyltransferase 3 beta, duplicate a	protein_coding	NP_001018312.2;XP_005167049.1;XP_005167050.1;XP_005167051.1;XP_005167053.1	ZDB-GENE-050314-4	2.77359	3.77679	1.78559e-10	2.69414e-09	4.39538	3.04	856	258	2.2283	0.722632	3.77573	1.12165
321166	NM_001030062,XM_005160629	apobb.1	apolipoprotein Bb, tandem duplicate 1	protein_coding	NP_001025233.1;XP_005160686.1	ZDB-GENE-030131-9732	-11.2989	5.19398	1.88139e-48	2.061e-46	2.79656	6.09247	254	2401	0.339067	3.33647	0.574532	5.17877
321177	XM_003199845	si:ch211-153b23.5	si:ch211-153b23.5	protein_coding	XP_003199893.1	ZDB-GENE-030131-9744	8.98756	5.42264	6.8693e-42	6.07067e-40	6.28616	3.25838	3290	306	52.0399	5.02481	88.1789	7.79938
321195	NM_001013259	serpina1l	serine (or cysteine) proteinase inhibitor, clade A (alpha-1 antiproteinase, antitrypsin), member 1, like	protein_coding	NP_001013277.3	ZDB-GENE-040721-3	-6.31446	4.1845	5.48508e-29	3.01221e-27	2.57636	5.01632	212	1120	1.97715	10.9262	3.35017	16.9594
321243	NM_001039171,NM_001039171_dup1,XM_009296659,XM_009296660	lama5	laminin, alpha 5	protein_coding	NP_001034260.1;XP_009294934.1;XP_009294935.1	ZDB-GENE-030131-9823	-10.0689	6.66722	3.46382e-48	3.77485e-46	4.27491	7.53823	784	6602	3.05311	19.282	0.86219	9.15814
321245	NM_205540	smyd1a	SET and MYND domain containing 1a	protein_coding	NP_991103.2	ZDB-GENE-030131-9825	3.91098	3.08238	3.4507e-15	8.45904e-14	3.84508	2.14288	571	122	5.66922	1.25533	9.6062	1.94849
321264	NM_213241	sp8a	sp8 transcription factor a	protein_coding	NP_998406.2	ZDB-GENE-030131-9849	-9.42371	0.023965	6.71824e-11	1.06968e-09	0.247725	1.48142	8	64	0.047738	0.432511	0.080889	0.671333
321314	NM_198874	lmbr1l	limb development membrane protein 1-like	protein_coding	NP_942575.1	ZDB-GENE-030131-9906	-2.19712	2.35847	9.67193e-06	6.79458e-05	2.06511	3.00016	136	250	0.887607	1.70522	1.504	2.6468
321324	NM_212583,NM_212583_dup1	slc39a1	solute carrier family 39 (zinc transporter), member 1	protein_coding	NP_997748.2	ZDB-GENE-030131-9917	-5.84923	2.04259	2.96653e-18	9.21641e-17	1.13373	3.00016	51	250	0.4134	2.13233	0.635522	3.11493
321390	NM_001305467,XM_017351596,XM_021467111	mipol1	mirror-image polydactyly 1	protein_coding	NP_001292396.1;XP_017207085.1;XP_021322786.1	ZDB-GENE-030131-41	-3.11324	2.40118	3.31063e-10	4.84568e-09	1.8288	3.16237	109	284	0.728552	2.03071	1.23449	3.15201
321502	NM_001199952,XM_021469301	krt96	keratin 96	protein_coding	NP_001186881.1;XP_021324976.1	ZDB-GENE-030131-221	-3.08465	7.22475	1.42233e-14	3.26594e-13	6.21381	7.82577	3127	8066	39.5555	107.621	67.0248	167.047
321541	NM_212588,XM_005155625	slc20a1b	solute carrier family 20 (phosphate transporter), member 1b	protein_coding	NP_997753.1;XP_005155682.1	ZDB-GENE-030131-260	-2.46296	8.85292	4.22497e-10	6.10329e-09	8.0662	9.3634	11403	23485	44.0808	95.1892	74.6926	147.75
321545	NM_182863,NM_182863_dup1,NM_182863_dup2	serpinc1	serpin peptidase inhibitor, clade C (antithrombin), member 1	protein_coding	NP_878283.1	ZDB-GENE-030131-264	-5.70819	0.682868	2.89169e-11	4.77776e-10	0.554179	1.88297	20	96	0.127425	0.637402	0.215915	0.989359
321552	NM_001020507,NM_001020507_dup1,XM_005162920	smyhc1	slow myosin heavy chain 1	protein_coding	NP_001018343.1	ZDB-GENE-030131-271	11.6617	3.51741	2.13223e-39	1.71829e-37	4.45513	1.48142	894	64	2.30848	0.169117	2.07354	0.13841
321657	NR_134972	si:dkey-188h10.3	si:dkey-188h10.3	lncRNA	.	ZDB-GENE-030131-376	-5.81551	-1.45117	0.000556462	0.00250623	0.129173	0.641612	4	20	0.077387	0.416829	0.131127	0.646991
321837	NM_182864	keap1a	kelch-like ECH-associated protein 1a	protein_coding	NP_878284.2	ZDB-GENE-030131-556	-2.74009	4.73409	3.29772e-11	5.42306e-10	3.92732	5.32023	607	1391	3.27751	7.818	5.55356	12.1349
321932	NM_001045281	hfe2	hemochromatosis type 2	protein_coding	NP_001038746.1	ZDB-GENE-030131-651	3.59077	-0.628799	0.000612799	0.00271863	0.936025	0.324272	39	9	0.347443	0.077652	0.588724	0.12053
322012	NM_199580,NM_199580_dup1,XM_021480967	hmmr	hyaluronan-mediated motility receptor (RHAMM)	protein_coding	NP_955874.2	ZDB-GENE-030131-731	2.00598	4.38845	5.02141e-06	3.76525e-05	4.85129	3.89625	1190	496	5.55171	2.39923	3.54222	3.35534
322055	NM_212604	cth	cystathionase (cystathionine gamma-lyase)	protein_coding	NP_997769.3	ZDB-GENE-030131-774	-2.22384	4.84979	1.01228e-07	1.03255e-06	4.23779	5.34827	763	1419	6.10771	11.8333	10.3492	18.3673
322073	NM_212607,XM_017358985	ubxn1	UBX domain protein 1	protein_coding	NP_997772.1;XP_017214474.1	ZDB-GENE-030131-792	-10.1994	7.2763	6.32034e-50	7.26425e-48	4.8419	8.14635	1182	10082	15.2412	134.469	25.8254	208.719
322256	NM_199591,XM_005160454	eif5	eukaryotic translation initiation factor 5	protein_coding	NP_955885.1;XP_005160511.1	ZDB-GENE-030131-975	-2.81374	8.57857	1.01217e-12	1.96393e-11	7.65442	9.1423	8561	20143	64.2431	158.339	108.857	245.77
322327	NM_001130586	apoa2	apolipoprotein A-II	protein_coding	NP_001124058.1	ZDB-GENE-030131-1046	-7.43816	6.23287	6.75453e-38	5.18496e-36	4.2342	7.06144	761	4734	17.7449	114.982	30.0679	178.472
322350	NM_212616	zgc:85789	zgc:85789	protein_coding	NP_997781.1	ZDB-GENE-030131-1069	-2.22576	3.74483	3.71516e-07	3.47293e-06	3.2156	4.28202	354	659	4.07593	7.89141	6.90646	12.2488
322372	NM_199601,XM_021477397,XM_021477398	fah	fumarylacetoacetate hydrolase (fumarylacetoacetase)	protein_coding	NP_955895.1;XP_021333072.1;XP_021333073.1	ZDB-GENE-030131-1091	2.26663	2.53269	3.7007e-06	2.86165e-05	3.15999	2.17007	339	125	2.04171	0.779194	3.45957	1.20944
322412	NM_001110021,NM_001110021_dup1,NM_001328425,NM_001328425_dup1	cpb1	carboxypeptidase B1 (tissue)	protein_coding	NP_001103491.2;NP_001315354.1	ZDB-GENE-030131-1132	-13.0164	3.73608	1.86646e-44	1.81747e-42	1.53443	4.68522	81	883	0.568477	6.45206	0.963254	10.0147
322451	NM_212618,NM_212618_dup1	ctrb1	chymotrypsinogen B1	protein_coding	NP_997783.1	ZDB-GENE-030131-1171	-21.7029	5.34738	5.62979e-69	1.06677e-66	2.19621	6.30053	153	2779	2.78361	52.8467	4.71668	82.0272
322453	NM_199605	prss59.1	protease, serine, 59, tandem duplicate 1	protein_coding	NP_955899.2	ZDB-GENE-030131-1173	-38.4857	6.46547	2.97069e-93	1.15709e-90	2.45222	7.43671	191	6151	3.47917	116.703	5.89527	181.144
322468	NM_001316326,XM_009307025	chs1	chitin synthase 1	protein_coding	NP_001303255.1;XP_009305300.1	ZDB-GENE-030131-1188	-7.53049	2.27021	1.51411e-23	6.45969e-22	1.08678	3.24566	48	303	0.157838	1.04741	0.267449	1.62576
322481	NM_199607	cel.1	carboxyl ester lipase, tandem duplicate 1	protein_coding	NP_955901.1	ZDB-GENE-030131-1201	-3.7155	2.47309	6.16679e-13	1.2179e-11	1.74057	3.27934	100	311	0.86609	2.80717	1.46754	4.35721
322482	NM_001001946,NM_001001946_dup1	adh8a	alcohol dehydrogenase 8a	protein_coding	NP_001001946.3	ZDB-GENE-030529-3	-3.65223	2.25418	4.30178e-12	7.88606e-11	1.60276	3.07877	87	266	0.905882	2.89286	1.53497	4.49021
322493	NM_001042721	slc2a2	solute carrier family 2 (facilitated glucose transporter), member 2	protein_coding	NP_001036186.1	ZDB-GENE-030131-1213	-4.34776	0.56125	1.83358e-08	2.09482e-07	0.621602	1.74515	23	84	0.1287	0.494044	0.218076	0.766842
322507	XM_002661186	wu:fb63c12	wu:fb63c12	protein_coding	XP_002661232.1	ZDB-GENE-030131-1227	2.57968	0.162473	0.00108855	0.00448668	1.33462	0.667279	65	21	0.499058	0.164822	0.845628	0.255832
322510	XM_002663831	si:ch73-106k19.5	si:ch73-106k19.5	protein_coding	XP_002663877.1	ZDB-GENE-030131-1230	3.09925	0.140918	8.66196e-05	0.000487522	1.36116	0.588867	67	18	0.765643	0.205176	1.29734	0.318469
322533	NM_001089325	anpepb	alanyl (membrane) aminopeptidase b	protein_coding	NP_001082794.1	ZDB-GENE-030131-1253	-9.43214	3.69777	1.1209e-36	8.2433e-35	1.79998	4.61111	106	837	0.501501	4.12905	0.849766	6.40899
322543	NM_001079861	apoa4b.1	apolipoprotein A-IV b, tandem duplicate 1	protein_coding	NP_001073330.1	ZDB-GENE-030131-1263	-12.7561	4.60594	2.26645e-49	2.54921e-47	2.18139	5.528	151	1612	1.95345	21.7614	3.31003	33.7775
322604	NM_001007151,NM_001007151_dup1	shbg	sex hormone-binding globulin	protein_coding	NP_001007152.1	ZDB-GENE-030131-1324	-6.66609	1.18686	5.47615e-15	1.32239e-13	0.664862	2.29881	25	140	0.243978	1.43019	0.413408	2.21991
322609	NM_212625	st6galnac3	ST6 (alpha-N-acetyl-neuraminyl-2,3-beta-galactosyl-1,3)-N-acetylgalactosaminide alpha-2,6-sialyltransferase 3	protein_coding	NP_997790.1	ZDB-GENE-030131-1329	6.73542	-0.976491	5.25415e-05	0.000310336	0.825989	0.153175	33	4	0.311772	0.036798	0.528281	0.057117
322660	NM_199616,NM_199616_dup1	upb1	ureidopropionase, beta	protein_coding	NP_955910.1	ZDB-GENE-030131-1380	-5.88442	-0.721834	7.45832e-06	5.3926e-05	0.218988	0.985592	7	35	0.072221	0.429501	0.122373	0.597275
322691	NM_201472	plg	plasminogen	protein_coding	NP_958880.2	ZDB-GENE-030131-1411	-12.6461	3.60582	5.44467e-43	5.02271e-41	1.47491	4.55722	76	805	0.368274	4.08605	0.624021	6.34226
322701	NM_001077758,XM_017352438	serpina1	serpin peptidase inhibitor, clade A (alpha-1 antiproteinase, antitrypsin), member 1	protein_coding	NP_001071226.1;XP_017207927.1	ZDB-GENE-030131-1421	-10.72	4.76549	3.07705e-45	3.09663e-43	2.4948	5.66489	198	1776	1.80156	20.3899	3.05265	31.6486
322921	XM_005169847,XM_005169848,XM_005169849,XM_005169850,XM_005169852,XM_017351774,XM_021467329	wu:fb77a09	wu:fb77a09, transcript variant X7	protein_coding	XP_005169904.1;XP_005169905.1;XP_005169906.1;XP_005169907.1;XP_005169909.1;XP_017207263.1;XP_021323004.1	ZDB-GENE-030131-1641	-2.77851	3.0619	1.21473e-09	1.65905e-08	2.43358	3.72657	188	437	0.489404	1.24105	0.82927	1.92632
323201	NM_001015060	marcksb	myristoylated alanine-rich protein kinase C substrate b	protein_coding	NP_001015060.2	ZDB-GENE-030131-1921	2.14531	5.23233	2.69226e-07	2.56809e-06	5.70567	4.6357	2186	852	12.038	4.8823	20.3977	7.57817
323285	NM_178131,NM_178131_dup1	scinla	scinderin like a	protein_coding	NP_835232.2	ZDB-GENE-030131-2005	-3.33147	10.0905	1.55535e-16	4.27631e-15	8.97846	10.7126	21498	59889	123.233	357.478	205.626	539.293
323301	XM_009306370,XM_009306371,XM_009306372,XM_009306374,XM_009306375,XR_002459730,XR_662993	abcc3	ATP-binding cassette, sub-family C (CFTR/MRP), member 3, transcript variant X3	protein_coding	XP_009304645.1;XP_009304646.1;XP_009304647.1;XP_009304649.1;XP_009304650.1	ZDB-GENE-050517-16	2.0405	6.18551	9.8728e-07	8.52689e-06	6.62352	5.6097	4168	1708	9.95629	4.10621	16.8704	6.37354
323320	NM_205544,XM_021477400	actn3b	actinin alpha 3b	protein_coding	NP_991107.2;XP_021333075.1	ZDB-GENE-030131-2040	2.7341	3.74487	3.19722e-10	4.69602e-09	4.35963	3.02519	834	255	2.69712	0.864113	4.57013	1.34125
323364	NM_001099228,NM_001099228_dup1	cd248a	CD248 molecule, endosialin a	protein_coding	NP_001092698.3	ZDB-GENE-030131-2084	2.79345	2.99787	1.43965e-09	1.95229e-08	3.66238	2.37087	498	149	2.49711	0.775622	4.23123	1.2039
323473	NM_199515	prdm1a	PR domain containing 1a, with ZNF domain	protein_coding	NP_955809.2	ZDB-GENE-030131-2193	3.9388	3.59862	1.367e-16	3.77821e-15	4.3364	2.55401	820	174	3.45024	0.759096	5.84624	1.17825
323754	XM_021466904,XM_021466905,XM_021472988,XM_021472989	atp8b2	ATPase, aminophospholipid transporter, class I, type 8B, member 2, transcript variant X3	protein_coding	XP_021328663.1;XP_021328664.1	ZDB-GENE-030131-2474	2.37985	3.70464	5.12791e-08	5.48046e-07	4.26791	3.11653	780	274	1.48426	0.534256	2.51501	0.829259
323834	NM_001039620,NM_001039620_dup1	dusp23a	dual specificity phosphatase 23a	protein_coding	NP_001034709.1	ZDB-GENE-030131-2554	-6.2468	2.12335	1.06041e-19	3.63843e-18	1.13373	3.08355	51	267	0.692149	3.82862	1.17281	5.94268
323839	NM_199657	scyl3	SCY1-like, kinase-like 3	protein_coding	NP_955951.1	ZDB-GENE-030131-2559	2.11812	4.95122	5.55687e-07	5.05089e-06	5.42422	4.37841	1791	707	10.4863	4.30709	17.7686	6.68535
323882	NM_199658	insm1b	insulinoma-associated 1b	protein_coding	NP_955952.1	ZDB-GENE-030131-2602	2.39309	1.97007	5.65923e-06	4.19861e-05	2.68542	1.70854	232	81	1.62965	0.591325	2.76135	0.917839
324023	XM_001919866,XM_005171104	dspa	desmoplakin a, transcript variant X2	protein_coding	XP_001919901.3;XP_005171161.1	ZDB-GENE-030131-2743	-2.91402	7.93189	2.03766e-13	4.21003e-12	6.97457	8.51005	5328	12983	10.424	26.9066	17.6629	41.7636
324205	XM_005160267,XM_005160268,XM_005160269	wu:fc21g02	wu:fc21g02, transcript variant X1	protein_coding	XP_005160324.1;XP_005160325.1;XP_005160326.1	ZDB-GENE-030131-2925	2.58384	4.96279	3.27926e-10	4.80312e-09	5.51936	4.19867	1916	620	8.15834	2.70093	13.8239	4.19232
324212	NM_001199969	cyp2aa6	cytochrome P450, family 2, subfamily AA, polypeptide 6	protein_coding	NP_001186898.2	ZDB-GENE-030131-2932	4.05375	3.9217	7.64884e-18	2.30815e-16	4.65474	2.80007	1033	213	8.81394	1.88748	14.9348	2.9297
324332	XM_009297585,XM_009297586,XM_009297587,XM_009297588,XM_017353885	agap3	ArfGAP with GTPase domain, ankyrin repeat and PH domain 3, transcript variant X2	protein_coding	XP_009295860.1;XP_009295861.1;XP_009295862.1;XP_009295863.1;XP_017209374.1	ZDB-GENE-110927-1	-3.64295	2.13122	1.22574e-11	2.11667e-10	1.52272	2.96954	80	244	0.18001	0.533788	0.305018	0.828531
324365	NM_212675	eif2s2	eukaryotic translation initiation factor 2, subunit 2 beta	protein_coding	NP_997840.1	ZDB-GENE-030131-3085	-2.32309	7.33437	5.81213e-09	7.2378e-08	6.61631	7.82398	4147	8056	49.786	100.709	84.3597	156.318
324373	NM_212677,NM_212677_dup1	dnajc4	DnaJ (Hsp40) homolog, subfamily C, member 4	protein_coding	NP_997842.1	ZDB-GENE-030131-3093	-2.04425	3.95481	4.22313e-06	3.21597e-05	3.48063	4.44484	434	742	2.83836	5.05401	3.89176	2.74949
324610	XM_021476836,XM_021476837,XM_021476839,XM_021476842,XM_021476843,XM_021476844,XM_021476846,XM_021476851,XM_021476854,XR_002459000	wu:fc34e06	wu:fc34e06, transcript variant X10	protein_coding	XP_021332511.1;XP_021332512.1;XP_021332514.1;XP_021332517.1;XP_021332518.1;XP_021332519.1;XP_021332521.1;XP_021332526.1;XP_021332529.1	ZDB-GENE-030131-3331	-4.98843	6.42252	1.51727e-26	7.70838e-25	4.8894	7.16867	1223	5102	2.0954	8.83404	3.55054	13.712
324689	NM_199693	arl11	ADP-ribosylation factor-like 11	protein_coding	NP_955987.1	ZDB-GENE-030131-3410	3.48399	0.540166	2.73538e-06	2.17517e-05	1.65733	0.692498	92	22	0.750431	0.185256	1.27157	0.28755
324835	NM_001015043	fbxl14b	F-box and leucine-rich repeat protein 14b	protein_coding	NP_001015043.1	ZDB-GENE-030131-3556	-2.18116	3.38244	1.36411e-06	1.14491e-05	2.91327	3.9311	279	509	2.94766	5.59872	4.99465	8.69018
324906	NR_120315	wu:fc47e11	wu:fc47e11	lncRNA	.	ZDB-GENE-030131-3629	-3.37896	3.99781	1.87771e-14	4.24209e-13	3.05008	4.67893	311	879	7.78307	22.9653	13.188	35.6461
324964	NM_001020549,NM_001020549_dup1	dclre1a	DNA cross-link repair 1A (PSO2 homolog, S. cerevisiae)	protein_coding	NP_001018385.4	ZDB-GENE-050522-124	-2.33867	1.4922	3.06039e-05	0.000190611	1.41283	2.29057	71	139	0.329492	0.668985	0.558307	1.03838
325085	XM_001921288,XM_005157671,XM_021466441	ssh2a	slingshot protein phosphatase 2a, transcript variant X2	protein_coding	XP_001921323.1;XP_005157728.1;XP_021322116.1	ZDB-GENE-030131-3810	2.07258	5.34017	8.28815e-07	7.26353e-06	5.796	4.77206	2330	940	8.53159	3.59276	14.4563	5.57658
325276	NM_001082996	cfap45	cilia and flagella associated protein 45	protein_coding	NP_001076465.2	ZDB-GENE-070209-143	2.22406	0.198863	0.00459709	0.0154384	1.32116	0.741649	64	24	0.525636	0.201848	0.890663	0.313303
325288	NM_178100	olig2	oligodendrocyte lineage transcription factor 2	protein_coding	NP_835201.1	ZDB-GENE-030131-4013	2.13517	1.69043	0.000149161	0.000788501	2.40835	1.59276	184	72	1.71152	0.691267	2.90008	1.07297
325423	NM_001017860	fstl1a	follistatin-like 1a	protein_coding	NP_001017860.1	ZDB-GENE-030131-4148	-3.52283	2.62627	1.82248e-12	3.44405e-11	1.89388	3.40289	116	342	1.21738	3.73292	2.06278	5.79414
325540	NM_001045244,XM_021478906,XM_021478911,XR_224754	sppl2	signal peptide peptidase-like 2	protein_coding	NP_001038709.2;XP_021334581.1;XP_021334586.1	ZDB-GENE-030131-4265	2.35397	4.37067	2.57919e-08	2.87788e-07	4.90415	3.73266	1236	439	6.7698	2.4745	11.4711	3.84085
325751	NM_001089331,XM_005170655,XM_017354055	chchd3b	coiled-coil-helix-coiled-coil-helix domain containing 3b	protein_coding	NP_001082800.1;XP_005170712.1;XP_017209544.1	ZDB-GENE-030131-4476	7.46105	2.91788	2.27169e-26	1.14582e-24	3.82615	1.46688	563	63	3.79311	0.371806	6.42722	0.577106
325881	NM_213390,XM_005168965	f2	coagulation factor II (thrombin)	protein_coding	NP_998555.1;XP_005169022.1	ZDB-GENE-030131-4606	-22.905	3.7824	3.61193e-57	5.09864e-55	1.1026	4.77354	49	941	0.306331	6.24027	0.519063	9.68598
325975	XM_002663821,XM_009306259,XM_021472501	slc41a1	solute carrier family 41 (magnesium transporter), member 1, transcript variant X1	protein_coding	XP_021328176.1	ZDB-GENE-030131-4700	-2.12572	1.33791	0.000293331	0.00143014	1.37425	2.13371	68	121	0.233407	0.433433	0.395496	0.672764
326030	NM_199736	slc6a19b	solute carrier family 6 (neutral amino acid transporter), member 19b	protein_coding	NP_956030.1	ZDB-GENE-030131-4755	-2.18634	1.1637	0.000296295	0.00144225	1.25192	2.00877	59	108	0.357848	0.68353	0.606355	1.06096
326033	NM_199737,NM_199737_dup1,XM_005169920	zgc:56622	zgc:56622	protein_coding	NP_956031.1	ZDB-GENE-030131-4758	-3.65716	-0.52438	0.000302407	0.00146505	0.35727	1.02583	12	37	0.110298	0.376149	0.097163	0.305237
326102	NM_001080012,NM_001080012_dup1,NM_001080012_dup2	hhip	hedgehog interacting protein	protein_coding	NP_001073481.1	ZDB-GENE-030131-4827	-3.09835	3.10794	1.75239e-11	2.96287e-10	2.37617	3.8067	179	464	0.603876	1.63418	0.492088	0.312836
326281	XM_001340280,XM_002665557,XM_002665561,XM_002665562,XM_005170079,XM_005170080,XM_005170081,XM_005170082,XM_021468312	mbpa	myelin basic protein a, transcript variant X9	protein_coding	XP_001340316.2;XP_002665603.1;XP_002665607.1;XP_002665608.1;XP_005170136.1;XP_005170137.1;XP_005170138.1;XP_005170139.1;XP_021323987.1	ZDB-GENE-030128-2	-7.72501	8.42577	9.53631e-41	8.05531e-39	6.31869	9.25245	3366	21744	27.975	189.914	47.4022	294.779
326283	NM_175083	smad3b	SMAD family member 3b	protein_coding	NP_778258.1	ZDB-GENE-030128-4	-2.27367	3.45416	3.14615e-07	2.97407e-06	2.93993	4.01596	285	542	2.17868	4.31224	3.69167	6.69334
326634	NM_001020519,XM_021476011	slc14a2	solute carrier family 14 (urea transporter), member 2	protein_coding	NP_001018355.1;XP_021331686.1	ZDB-GENE-030131-4833	-4.31916	0.286789	3.22939e-07	3.04864e-06	0.530986	1.55201	19	69	0.099058	0.388314	0.167849	0.60273
326706	NM_001005958	lgals1l1	lectin, galactoside-binding, soluble, 1 (galectin 1)-like 1	protein_coding	NP_001005958.2	ZDB-GENE-030131-4905	3.51288	1.9038	3.23808e-10	4.7494e-09	2.7471	1.39188	244	58	4.33201	1.06054	7.34037	1.64614
326729	NM_198807	pif1	PIF1 5'-to-3' DNA helicase homolog (S. cerevisiae)	protein_coding	NP_942102.1	ZDB-GENE-030131-4928	-4.74109	-0.24184	1.62683e-06	1.34343e-05	0.35727	1.22908	12	48	0.074305	0.310855	0.125905	0.482501
326931	NM_199753	cnn3a	calponin 3, acidic a	protein_coding	NP_956047.1	ZDB-GENE-030131-5130	-2.87243	6.61687	6.15845e-13	1.21739e-11	5.69136	7.19537	2164	5198	17.0211	42.5759	28.8414	66.0852
326935	NM_199754,NM_199754_dup1,NM_199754_dup2	ier5l	immediate early response 5-like	protein_coding	NP_956048.1	ZDB-GENE-030131-5134	2.0505	3.18944	1.21417e-05	8.3259e-05	3.71991	2.79426	520	212	3.59653	1.52204	6.09412	2.36246
327007	NM_199759,NM_199759_dup1	vamp8	vesicle-associated membrane protein 8 (endobrevin)	protein_coding	NP_956053.1	ZDB-GENE-030131-5215	2.77841	3.4834	3.66895e-10	5.34411e-09	4.11643	2.78257	698	210	5.9634	1.85759	1.20803	2.8833
327034	XM_021478783	si:dkey-90l23.1	si:dkey-90l23.1	protein_coding	XP_021334458.1	ZDB-GENE-030131-5242	-26.7729	4.61108	3.38329e-69	6.46915e-67	1.46271	5.58803	75	1682	0.612114	14.4276	1.0372	22.3941
327067	NM_214702,NM_214702_dup1	slc25a4	solute carrier family 25 (mitochondrial carrier; adenine nucleotide translocator), member 4	protein_coding	NP_999867.1	ZDB-GENE-030131-5275	4.57051	3.77972	4.26918e-20	1.5271e-18	4.54904	2.56087	957	175	10.4663	1.98643	6.59702	3.08328
327082	NM_199766	napab	N-ethylmaleimide-sensitive factor attachment protein, alpha b	protein_coding	NP_956060.1	ZDB-GENE-030131-5290	-2.09615	5.33571	5.41389e-07	4.92518e-06	4.75824	5.79792	1113	1951	10.9244	19.9461	18.5109	30.9598
327096	NM_212701,XM_005170214,XM_009295014	hlx1	H2.0-like homeo box 1 (Drosophila)	protein_coding	NP_997866.1;XP_005170271.1;XP_009293289.1	ZDB-GENE-030131-5304	3.12487	3.50325	3.88589e-12	7.1444e-11	4.17558	2.69169	729	195	6.68668	1.44171	11.3302	2.23778
327154	NM_200507	fam46c	family with sequence similarity 46, member C	protein_coding	NP_956801.2	ZDB-GENE-030131-5365	-24.6671	3.35982	5.25159e-54	6.81832e-52	0.844921	4.37257	34	704	0.294124	6.37748	0.498378	9.89896
327172	NM_198808,XM_021478992	stap2a	signal transducing adaptor family member 2a	protein_coding	NP_942103.1;XP_021334667.1	ZDB-GENE-030131-5383	2.10462	3.31896	5.10926e-06	3.82567e-05	3.85211	2.88456	574	228	3.40836	1.57474	5.77529	2.44427
327175	XM_001920867,XM_021469267,XM_021469268,XM_021469269	larp1	La ribonucleoprotein domain family, member 1, transcript variant X3	protein_coding	XP_001920902.3;XP_021324942.1;XP_021324943.1;XP_021324944.1	ZDB-GENE-030131-5386	-3.03024	6.91685	3.92659e-14	8.61188e-13	5.92947	7.51301	2560	6487	11.6009	29.1902	19.6571	45.3082
327179	XM_002666402	top1	topoisomerase (DNA) I	protein_coding	XP_002666448.2	ZDB-GENE-030131-5390	-2.80901	1.20837	2.45818e-06	1.97189e-05	1.13373	2.12447	51	120	0.271255	0.670461	0.459627	1.04067
327253	NM_199775,XM_021470455	hdac10	histone deacetylase 10	protein_coding	NP_956069.1;XP_021326130.1	ZDB-GENE-030131-5464	3.0795	3.45014	7.89185e-12	1.39722e-10	4.12032	2.66008	700	190	4.7571	1.33746	8.06065	2.07597
327268	NM_199777,XM_017356444	sec23b	Sec23 homolog B, COPII coat complex component	protein_coding	NP_956071.1;XP_017211933.1	ZDB-GENE-030131-5479	-2.49012	5.89656	5.47707e-10	7.79954e-09	5.13414	6.42564	1457	3034	7.19676	14.4217	12.1945	22.385
327320	NM_001328531	f5	coagulation factor V	protein_coding	NP_001315460.1	ZDB-GENE-030131-5531	5.03671	3.65494	9.88566e-22	3.89373e-20	4.45205	2.36304	892	148	2.15935	0.37097	3.65891	0.57581
327325	NM_199786	clec14a	C-type lectin domain containing 14A	protein_coding	NP_956080.1	ZDB-GENE-030131-5536	2.92124	4.25344	6.49922e-12	1.16438e-10	4.87336	3.41809	1209	346	10.8607	3.22978	18.4029	5.01317
327332	XM_002665128,XM_021473053	si:dkey-36g24.3	si:dkey-36g24.3	protein_coding	XP_021328728.1	ZDB-GENE-030131-5543	2.92491	2.76115	8.80273e-10	1.2221e-08	3.45929	2.14288	427	122	1.85763	0.548901	3.14766	0.85199
327364	XM_021468721,XM_021468722	wu:fi04e12	wu:fi04e12, transcript variant X2	protein_coding	XP_021324396.1;XP_021324397.1	ZDB-GENE-030131-5575	-3.9286	7.86624	1.81915e-20	6.66587e-19	6.58005	8.54281	4043	13282	7.77941	26.6615	13.1818	41.3833
327377	NM_199795	tuba4l	tubulin, alpha 4 like	protein_coding	NP_956089.1	ZDB-GENE-030131-5588	-13.6902	3.50909	6.15662e-44	5.85938e-42	1.34795	4.4724	66	757	0.665071	7.95248	1.12693	12.3436
327419	XM_002663529,XM_021479316	wu:fi09b08	wu:fi09b08, transcript variant X2	protein_coding	XP_002663575.4	ZDB-GENE-030131-5630	-18.7134	4.39526	3.08464e-58	4.5055e-56	1.64658	5.3552	91	1426	0.612688	10.1269	1.03817	15.7187
327429	NM_199804	cntn5	contactin 5	protein_coding	NP_956098.1	ZDB-GENE-030131-5640	2.59724	4.13347	9.45957e-10	1.30725e-08	4.71387	3.42186	1078	347	4.00404	1.3405	6.78463	2.08068
327447	NM_199807	nploc4	NPL4 homolog, ubiquitin recognition factor	protein_coding	NP_956101.1	ZDB-GENE-030131-5658	-2.31054	5.96171	1.09733e-08	1.3084e-07	5.27167	6.45863	1607	3105	10.3653	20.8568	17.5635	32.3734
327507	XR_660079	tgds	TDP-glucose 4,6-dehydratase	misc_RNA	.	ZDB-GENE-030131-5718	-2.11309	-0.2431	0.0185387	0.0496847	0.599476	1.06498	22	39	1.15694	2.18482	1.96037	3.39122
327590	NM_199832	tk1	thymidine kinase 1, soluble	protein_coding	NP_956126.1	ZDB-GENE-030131-5801	-2.36174	0.887122	0.000160262	0.000836841	1.05462	1.82714	46	91	0.257455	0.537892	0.436245	0.834901
327615	NM_001025297,XM_005162877	crp2	C-reactive protein 2	protein_coding	NP_001020468.1;XP_005162934.1	ZDB-GENE-030131-5826	-77.3923	3.59238	4.52883e-74	1.00268e-71	0.383405	4.63245	13	850	0.147702	11.4804	0.250273	17.8196
333933	NM_199843,NM_199843_dup1	shcbp1	SHC SH2-domain binding protein 1	protein_coding	NP_956137.1	ZDB-GENE-030131-5865	-2.12552	0.623946	0.00212081	0.00793578	0.970915	1.60609	41	73	0.227813	0.418968	0.386017	0.650311
334017	NM_207056,NM_207056_dup1	pla1a	phospholipase A1 member A	protein_coding	NP_996939.1	ZDB-GENE-030131-5949	-2.51599	2.74504	8.36923e-08	8.65013e-07	2.26108	3.39906	162	341	0.743199	1.62747	1.25931	2.52611
334026	XM_002663682,XM_009305744,XM_009305746,XM_017358258	si:dkey-40c23.2	si:dkey-40c23.2, transcript variant X2	protein_coding	XP_002663728.2;XP_009304019.1;XP_009304021.1;XP_017213747.1	ZDB-GENE-030131-5958	-2.04719	3.0181	1.61485e-05	0.000107604	2.65356	3.56528	226	387	0.699724	1.24588	1.18565	1.93383
334036	NM_001040389,NM_212718	si:dkeyp-50f7.2	si:dkeyp-50f7.2	protein_coding	NP_001035479.1;NP_997883.1	ZDB-GENE-030131-5968	-26.4483	4.80784	1.32197e-70	2.69951e-68	1.60276	5.78039	87	1927	0.575569	15.915	0.975272	24.7028
334086	NM_199857,NM_199857_dup1,NM_199857_dup2,NM_199857_dup3	hspa4b	heat shock protein 4b	protein_coding	NP_956151.1	ZDB-GENE-030131-6018	-2.2453	4.60157	9.39039e-08	9.62826e-07	3.99456	5.11054	638	1198	6.15766	6.54898	7.42787	2.81553
334100	NM_199858,XM_005156271,XM_005156272,XM_005156273,XM_009306591	ldb3b	LIM domain binding 3b	protein_coding	NP_956152.1;XP_005156328.1;XP_005156329.1;XP_005156330.1;XP_009304866.1	ZDB-GENE-030131-6032	3.35417	3.20524	9.27547e-13	1.8064e-11	3.91617	2.37866	602	150	5.17352	1.40702	8.76625	2.18395
334102	NM_212721,XM_005162562,XM_009297288	cdv3	carnitine deficiency-associated gene expressed in ventricle 3	protein_coding	NP_997886.1;XP_005162619.1;XP_009295563.1	ZDB-GENE-030131-6034	-2.60133	6.86359	5.44757e-11	8.76655e-10	6.0368	7.4025	2761	6006	20.22	45.931	34.2617	71.2929
334108	XM_002664019	kif5bb	kinesin family member 5B, b	protein_coding	XP_002664065.1	ZDB-GENE-070629-4	-3.94441	3.53702	1.02614e-16	2.85866e-15	2.50674	4.2841	200	660	0.881638	3.0357	1.49389	4.71194
334113	NM_001083813	bcan	brevican	protein_coding	NP_001077282.1	ZDB-GENE-030131-6045	3.28738	4.41477	2.47269e-14	5.54458e-13	5.07022	3.44801	1392	354	3.87791	1.02631	6.57091	1.59301
334167	NM_212723,XM_021479017	mknk2a	MAP kinase interacting serine/threonine kinase 2a	protein_coding	NP_997888.1;XP_021334692.1	ZDB-GENE-030131-6099	-9.87173	9.59799	2.3456e-49	2.6242e-47	7.16552	10.4598	6088	50256	27.1381	233.228	45.9841	362.01
334189	NM_199869,NM_199869_dup1	insig1	insulin induced gene 1	protein_coding	NP_956163.1	ZDB-GENE-030131-6121	-2.40401	3.90504	2.26837e-08	2.55001e-07	3.29002	4.46693	375	754	3.41848	7.15382	5.43332	9.35352
334195	NM_199871,NM_199871_dup1	mat1a	methionine adenosyltransferase I, alpha	protein_coding	NP_956165.1	ZDB-GENE-030131-6127	-4.35369	2.71123	2.38294e-16	6.43394e-15	1.78045	3.53771	104	379	0.659892	2.50334	1.11815	3.88562
334269	NM_001346203,XM_021479555	myom2a	myomesin 2a	protein_coding	NP_001333132.1;XP_021335230.1	ZDB-GENE-030131-6201	5.28297	3.17957	5.47729e-21	2.06459e-19	4.00932	1.94724	645	102	1.99193	0.326861	3.37522	0.507345
334271	NM_001114886	nufip1	nuclear fragile X mental retardation protein interacting protein 1	protein_coding	NP_001108358.1	ZDB-GENE-030131-6203	-2.1675	3.19536	2.38653e-06	1.91587e-05	2.75713	3.75378	246	446	2.39896	4.52387	4.06491	7.02183
334273	NM_199881,XM_017357732,XM_021479039,XM_021479043	pls1	plastin 1 (I isoform)	protein_coding	NP_956175.1;XP_017213221.1;XP_021334714.1;XP_021334718.1	ZDB-GENE-030131-6205	-2.03461	3.34538	1.12838e-05	7.7993e-05	2.93993	3.86609	285	485	1.40582	2.51094	2.38209	3.89741
334304	NM_199886,NM_199886_dup1	ela2l	elastase 2 like	protein_coding	NP_956180.1	ZDB-GENE-040511-1	-12.18	4.77318	4.89003e-49	5.38493e-47	2.3631	5.68702	177	1804	3.15118	33.4356	5.33951	51.8978
334334	NM_201483,XM_021479057	ivns1abpb	influenza virus NS1A binding protein b	protein_coding	NP_958891.1;XP_021334732.1	ZDB-GENE-030131-6266	-2.29621	6.38658	1.18053e-08	1.39809e-07	5.69332	6.8768	2167	4161	11.5	23.1725	19.4862	35.9678
334390	NM_199895	nfat5a	nuclear factor of activated T-cells 5, tonicity-responsive a	protein_coding	NP_956189.1	ZDB-GENE-030131-6322	-2.06321	-0.778917	0.0444493	0.101125	0.434294	0.789181	15	26	0.04264	0.074949	0.072251	0.116334
334503	NM_001005293,NM_001005293_dup1	ric8b	RIC8 guanine nucleotide exchange factor B	protein_coding	NP_001005293.1	ZDB-GENE-030131-6435	-5.61852	5.47847	1.1753e-28	6.3876e-27	3.85445	6.26051	575	2702	4.91838	24.0835	8.33393	37.3818
334526	NM_001004503,NM_001114892,NM_199908	musk	muscle, skeletal, receptor tyrosine kinase	protein_coding	NP_001004503.1;NP_001108364.1;NP_956202.2	ZDB-GENE-030131-6458	-3.44553	0.932902	1.28132e-07	1.28394e-06	0.882056	1.96804	36	104	0.128967	0.396657	0.218527	0.61568
334529	NM_199910,XM_005161011,XM_021468757	aqp7	aquaporin 7	protein_coding	NP_956204.2;XP_005161068.1;XP_021324432.1	ZDB-GENE-030131-6461	-2.69528	-0.532689	0.00297647	0.0106037	0.434294	0.965043	15	34	0.08349	0.197345	0.14147	0.306314
334561	NM_001099739	acsl4b	acyl-CoA synthetase long-chain family member 4b	protein_coding	NP_001093209.1	ZDB-GENE-030131-6493	-2.18338	4.28759	3.43142e-07	3.22489e-06	3.72758	4.79407	523	955	2.16341	4.11568	3.66579	6.38824
334613	NM_001013261,XM_005160284,XM_009305554	fn1b	fibronectin 1b	protein_coding	NP_001013279.1;XP_005160341.1;XP_009303829.1	ZDB-GENE-030131-6545	3.10184	7.04629	1.20217e-14	2.78165e-13	7.64955	6.0314	8532	2300	16.009	4.4415	27.1265	6.89397
335008	XM_003201387	pla2g15	phospholipase A2, group XV	protein_coding	XP_003201435.2	ZDB-GENE-030131-6948	3.55263	6.32223	1.43532e-17	4.25199e-16	6.97457	5.17459	5328	1254	35.2475	8.63281	59.725	13.3996
335078	XM_003197796	wu:fk65c09	wu:fk65c09	protein_coding	XP_003197844.3	ZDB-GENE-030131-7018	7.41016	1.76047	4.18226e-19	1.37018e-17	2.77204	0.835197	249	28	2.2498	0.256225	3.81217	0.397706
335152	XM_002662495,XM_021477355	prss60.3	protease, serine, 60.3, transcript variant X2	protein_coding	XP_002662541.2	ZDB-GENE-030131-7092	2.48744	-1.14545	0.0425388	0.0978156	0.643394	0.291637	24	8	0.123035	0.04136	0.208477	0.064198
335229	NM_199941	serpinb1l4	serpin peptidase inhibitor, clade B (ovalbumin), member 1, like 4	protein_coding	NP_956235.2	ZDB-GENE-030131-7169	2.11298	3.12797	6.30294e-06	4.6256e-05	3.67566	2.71649	503	199	5.43066	2.23297	9.20196	3.46595
335231	NM_199942	fbp1a	fructose-1,6-bisphosphatase 1a	protein_coding	NP_956236.1	ZDB-GENE-030131-7171	-6.74625	5.33579	1.43794e-33	9.45128e-32	3.51354	6.15617	445	2511	4.32341	25.431	7.3258	39.4733
335269	NM_001024386,XM_005166790,XM_005166791	itgb4	integrin, beta 4	protein_coding	NP_001019557.1;XP_005166847.1;XP_005166848.1	ZDB-GENE-030131-7209	-3.24363	6.89154	1.21121e-15	3.07302e-14	5.83143	7.51146	2389	6480	4.42647	12.2457	7.50043	19.0075
335285	XM_003201484,XM_017355813,XM_017355814,XR_002458686,XR_661458	si:ch73-170d6.2	si:ch73-170d6.2, transcript variant X3	protein_coding	XP_003201532.2;XP_017211302.1;XP_017211303.1	ZDB-GENE-030131-7225	-2.02141	3.84091	6.58891e-06	4.80529e-05	3.38686	4.33102	404	683	2.08542	3.63169	3.53364	5.63701
335307	XM_009304365,XM_009304366	wu:fl23c11	wu:fl23c11, transcript variant X1	protein_coding	XP_009302640.1;XP_009302641.1	ZDB-GENE-030131-7247	-3.43491	-0.831799	0.0018476	0.00705786	0.303537	0.857666	10	29	0.053578	0.176196	0.090787	0.273488
335340	XM_002666688	dnah5l	dynein, axonemal, heavy chain 5 like	protein_coding	XP_002666734.3	ZDB-GENE-091204-287	4.55083	2.44517	1.12038e-15	2.84945e-14	3.29347	1.55201	376	69	0.406111	0.077016	0.688134	0.119542
335392	NM_001305473	si:ch211-153b23.4	si:ch211-153b23.4	protein_coding	NP_001292402.1	ZDB-GENE-030131-7332	51.3408	4.08999	4.09386e-74	9.16022e-72	5.09711	0.717283	1419	23	7.18912	0.119464	12.1816	0.185429
335521	NM_001305594	efhd1	EF-hand domain family, member D1	protein_coding	NP_001292523.1	ZDB-GENE-030131-7461	2.0855	6.33113	4.43083e-07	4.0785e-06	6.77804	5.7318	4644	1862	55.3289	23.1002	93.7519	35.8555
335530	XM_021477420	wu:fj19g03	wu:fj19g03	protein_coding	XP_021333095.1	ZDB-GENE-030131-7470	2.24586	0.317892	0.00250094	0.00914186	1.40008	0.789181	70	26	0.411898	0.159932	0.697939	0.248242
335651	NM_199965	rbp4l	retinol binding protein 4, like	protein_coding	NP_956259.1	ZDB-GENE-030131-7591	3.49701	11.218	1.0262e-17	3.07027e-16	11.8555	10.0503	158202	37829	2920.57	727.177	4948.75	1128.7
335722	NM_001001947,XM_005157961,XM_017351320,XM_021466634	dfna5b	deafness, autosomal dominant 5 b	protein_coding	NP_001001947.1;XP_005158018.1;XP_017206809.1;XP_021322309.1	ZDB-GENE-030131-7662	-2.62848	1.94826	3.82685e-07	3.56625e-06	1.63575	2.71033	90	198	0.598249	0.888681	1.0137	1.37939
335789	NM_001013262	crygmx	crystallin, gamma MX	protein_coding	NP_001013280.1	ZDB-GENE-030131-7732	-22.1006	11.1307	6.17562e-80	1.7091e-77	7.60825	12.0672	8290	153206	158.122	3043.03	267.93	4723.31
335821	NM_207059	aqp1a.1	aquaporin 1a (Colton blood group), tandem duplicate 1	protein_coding	NP_996942.1	ZDB-GENE-030131-7764	2.1912	6.59772	6.81279e-08	7.13968e-07	7.06515	5.94616	5676	2166	74.7462	29.6944	126.653	46.0908
336159	NM_001100066,NM_001100066_dup1,XM_021474935,XM_021474936	optn	optineurin	protein_coding	NP_001093536.2;XP_021330610.1;XP_021330611.1	ZDB-GENE-030131-8103	2.14124	5.08849	3.44767e-07	3.23727e-06	5.56361	4.49945	1977	772	13.6838	5.50706	9.77492	6.04777
336165	NM_200000	myl1	myosin, light chain 1, alkali; skeletal, fast	protein_coding	NP_956294.1	ZDB-GENE-030131-8109	11.5408	4.38026	1.29403e-44	1.27184e-42	5.29165	2.10582	1630	118	23.1767	1.73815	39.2716	2.6979
336346	NM_213122	sox4a	SRY (sex determining region Y)-box 4a	protein_coding	NP_998287.1	ZDB-GENE-030131-8290	2.09403	6.33356	3.8335e-07	3.56928e-06	6.78234	5.73028	4658	1860	22.1219	9.19736	37.4845	14.2759
336351	NM_212753,XM_005163364	prg4a	proteoglycan 4a	protein_coding	NP_997918.2;XP_005163421.1	ZDB-GENE-030131-8295	3.2448	1.14622	2.15991e-07	2.09063e-06	2.09705	1.00585	140	36	1.08959	0.286017	1.84626	0.443948
336380	XM_002663518,XM_005155644	si:dkey-242g16.2	si:dkey-242g16.2, transcript variant X2	protein_coding	XP_002663564.1;XP_005155701.1	ZDB-GENE-030131-8324	-4.20219	4.86507	2.12716e-20	7.74059e-19	3.608	5.58635	478	1680	4.15914	15.2526	7.04744	23.6746
336526	NM_198876	b3gnt5a	UDP-GlcNAc:betaGal beta-1,3-N-acetylglucosaminyltransferase 5a	protein_coding	NP_942577.1	ZDB-GENE-030131-8470	-5.83962	4.52419	5.45283e-28	2.90353e-26	2.94871	5.33131	287	1402	1.90807	9.71499	3.23313	15.0793
336529	NM_212755	oprd1b	opioid receptor, delta 1b	protein_coding	NP_997920.2	ZDB-GENE-030131-8473	2.9546	0.364803	8.23172e-05	0.000466051	1.49902	0.692498	78	22	0.505578	0.148328	0.856675	0.230231
336575	NM_212756	grn2	granulin 2	protein_coding	NP_997921.1	ZDB-GENE-050522-264	-2.02202	3.33943	1.33059e-05	9.05364e-05	2.93993	3.85776	285	482	6.4004	11.2747	10.8451	17.5003
336673	NM_001017865,NM_001017865_dup1,NM_001017865_dup2	ch25hl1.1	cholesterol 25-hydroxylase like 1, tandem duplicate 1	protein_coding	NP_001017865.1	ZDB-GENE-030131-8617	-2.97509	3.08803	9.03382e-11	1.41691e-09	2.39556	3.77459	182	453	2.58698	6.71557	4.38351	10.4237
336806	XM_017354518	wu:fb05h10	wu:fb05h10	protein_coding	XP_017210007.1	ZDB-GENE-030131-8750	5.02715	1.71817	5.72678e-14	1.24049e-12	2.66957	1.04554	229	38	0.5145	0.086983	0.871794	0.135013
337077	XM_001919721	sdc3	syndecan 3	protein_coding	XP_001919756.7	ZDB-GENE-030131-9021	-2.68308	2.67207	1.36662e-08	1.60192e-07	2.15129	3.35631	147	330	0.908069	2.12258	1.53868	3.29462
337110	NR_125778	si:ch211-181p13.2	si:ch211-181p13.2	lncRNA	.	ZDB-GENE-030131-9054	4.87033	-1.6752	0.0103994	0.030643	0.507414	0.116379	18	3	0.401356	0.066718	0.680076	0.103557
337193	NM_200054	setd3	SET domain containing 3	protein_coding	NP_956348.1	ZDB-GENE-030131-9137	-2.34162	5.73774	7.27467e-09	8.96357e-08	5.04076	6.24301	1363	2669	5.52907	11.2805	9.36873	17.5092
337315	NM_212774	fgb	fibrinogen beta chain	protein_coding	NP_997939.1	ZDB-GENE-030131-9261	-35.9368	4.70112	6.2395e-77	1.52599e-74	1.26604	5.68937	60	1807	0.536298	16.8805	0.908729	26.2014
337325	NM_001128670	pdzk1	PDZ domain containing 1	protein_coding	NP_001122142.2	ZDB-GENE-031222-1	-7.81897	1.7379	2.25108e-20	8.16328e-19	0.806805	2.78257	32	210	0.21349	1.45954	0.361748	2.26546
337376	NM_200061,NM_200061_dup1	alox5ap	arachidonate 5-lipoxygenase-activating protein	protein_coding	NP_956355.2	ZDB-GENE-030131-9322	2.42126	0.0995125	0.00192057	0.00728632	1.28002	0.667279	61	21	0.661234	0.239756	0	0.094899
337413	NM_001130590,NM_001130590_dup1	stat6	signal transducer and activator of transcription 6, interleukin-4 induced	protein_coding	NP_001124062.1	ZDB-GENE-030131-9359	-2.99199	2.74777	2.48014e-10	3.69701e-09	2.12054	3.46274	143	358	0.796198	2.08779	0.576373	1.27126
337489	NM_200068,XM_005163356	plcd1b	phospholipase C, delta 1b	protein_coding	NP_956362.1;XP_005163413.1	ZDB-GENE-030131-9435	-2.94029	4.38756	3.21462e-12	5.96235e-11	3.53702	5.00881	453	1114	2.30206	5.8946	3.90072	9.14944
337514	NM_001351837,NM_212779,XM_021479113	mpx	myeloid-specific peroxidase	protein_coding	NP_001338766.1;NP_997944.2;XP_021334788.1	ZDB-GENE-030131-9460	-2.30035	2.74044	1.06147e-06	9.10793e-06	2.32989	3.36025	172	331	0.824646	1.67564	1.39732	2.60088
337730	NM_001244080,NM_001244080_dup1	capn8	calpain 8	protein_coding	NP_001231009.1	ZDB-GENE-050522-279	5.47614	-0.319589	1.94817e-06	1.58944e-05	1.1642	0.291637	53	8	0.348765	0.053161	0	0
337771	NM_001089340	zgc:162858	zgc:162858	protein_coding	NP_001082809.1	ZDB-GENE-030131-7909	2.15536	6.06425	1.49512e-07	1.47846e-06	6.52865	5.43861	3900	1513	43.8936	17.7255	74.3754	27.513
337784	XM_002663450,XR_002459567	hlcs	holocarboxylase synthetase (biotin-(proprionyl-CoA-carboxylase (ATP-hydrolysing)) ligase), transcript variant X1	protein_coding	XP_002663496.6	ZDB-GENE-030131-5333	-2.0934	3.17885	6.84813e-06	4.98225e-05	2.77204	3.72351	249	436	2.20632	4.03532	3.7385	6.26351
337795	NM_001077794	dact2	dishevelled-binding antagonist of beta-catenin 2	protein_coding	NP_001071262.2	ZDB-GENE-030131-9975	2.18247	1.01916	0.00059571	0.00265513	1.88476	1.15844	115	44	0.578184	0.227803	0.979702	0.35359
338204	NM_198208	tfdp2	transcription factor Dp-2	protein_coding	NP_937851.1	ZDB-GENE-030219-104	2.41164	3.69168	3.59897e-08	3.93846e-07	4.26088	3.09305	776	269	6.07527	2.18681	10.2942	3.3943
338267	NM_200318,NM_200318_dup1	arl4ab	ADP-ribosylation factor-like 4ab	protein_coding	NP_956612.1	ZDB-GENE-030219-167	-3.26172	4.87629	9.87394e-15	2.32823e-13	3.8845	5.52098	588	1604	4.79907	13.6301	6.85599	2.45926
353154	NM_180973	sp5a	Sp5 transcription factor a	protein_coding	NP_851304.2	ZDB-GENE-030430-2	2.2567	1.41505	9.27887e-05	0.000518911	2.20357	1.3764	154	57	0.764165	0.290665	1.29484	0.451162
359828	NM_182869	hic2	hypermethylated in cancer 2	protein_coding	NP_878289.2	ZDB-GENE-030619-1	-2.6922	1.04887	9.52718e-06	6.70185e-05	1.07079	1.98855	47	106	0.345632	0.812244	0.585655	1.26074
359831	NM_182871,XM_009307694	fgf24	fibroblast growth factor 24	protein_coding	NP_878291.2;XP_009305969.1	ZDB-GENE-030708-1	2.42883	3.9792	1.54125e-08	1.78508e-07	4.5389	3.34443	950	327	5.7513	2.05609	9.74528	3.19141
360136	NM_182883	penkb	proenkephalin b	protein_coding	NP_878303.1	ZDB-GENE-030729-3	5.48949	-0.692193	3.27027e-05	0.000202424	0.953575	0.224067	40	6	0.443075	0.067971	0.750767	0.105503
360151	NM_182891	opn1mw2	opsin 1 (cone pigments), medium-wave-sensitive, 2	protein_coding	NP_878311.1	ZDB-GENE-030728-5	-5.83785	9.95891	6.61779e-32	4.13033e-30	8.19028	10.7316	12431	60684	116.898	594.247	198.078	922.374
368228	NM_200083	penka	proenkephalin a	protein_coding	NP_956377.2	ZDB-GENE-030729-31	3.47079	4.34334	2.42055e-15	5.99664e-14	5.018	3.32843	1341	323	14.4839	3.62501	24.5422	5.62664
368234	NM_001005586,XM_005165122,XM_005165123,XM_005165124	plp1b	proteolipid protein 1b	protein_coding	NP_001005586.1;XP_005165179.1;XP_005165180.1;XP_005165181.1	ZDB-GENE-030710-6	-3.62331	5.65298	1.27576e-17	3.78463e-16	4.50805	6.31886	929	2815	8.21598	26.2923	13.9216	40.8102
368241	NM_001328404,NM_183341,XM_021467119	egr2a	early growth response 2a	protein_coding	NP_001315333.1;NP_899184.1;XP_021322794.1	ZDB-GENE-030723-6	-6.03114	1.45851	1.56709e-15	3.92388e-14	0.825989	2.50503	33	167	0.298293	1.64978	0.505442	2.56074
368249	NM_183342,XM_005174210	prickle1a	prickle homolog 1a	protein_coding	NP_899185.2;XP_005174267.1	ZDB-GENE-030724-5	-6.12663	1.88821	5.21345e-18	1.59614e-16	1.02172	2.87358	44	226	0.231035	1.27996	0.391477	1.98672
368253	NM_001013265,XM_021468369,XM_021468370	pinx1	PIN2/TERF1 interacting, telomerase inhibitor 1	protein_coding	NP_001013283.2;XP_021324044.1;XP_021324045.1	ZDB-GENE-030515-2	-2.43657	4.90353	3.24693e-09	4.18973e-08	4.20152	5.43954	743	1514	9.90157	21.3614	16.7777	33.1565
368254	NM_183344	paqr8	progestin and adipoQ receptor family member VIII	protein_coding	NP_899187.1	ZDB-GENE-030728-3	-3.28772	-0.527149	0.000430003	0.00198775	0.383405	1.00585	13	36	0.131462	0.396242	0.222756	0.615036
368255	NM_201486	clic4	chloride intracellular channel 4	protein_coding	NP_958894.1	ZDB-GENE-030326-3	-2.62448	5.40259	8.25995e-11	1.30039e-09	4.60425	5.95921	996	2186	5.21816	11.9255	8.84191	18.5105
368260	NM_201318,XM_005171666,XM_005171667,XM_021474937	nap1l1	nucleosome assembly protein 1-like 1	protein_coding	NP_958475.1;XP_005171723.1;XP_005171724.1;XP_021330612.1	ZDB-GENE-030516-2	-2.99729	8.68577	4.45471e-14	9.71949e-13	7.69362	9.27265	8798	22051	37.3413	105.524	63.2728	163.792
368263	NM_001001950	zic3	zic family member 3 heterotaxy 1 (odd-paired homolog, Drosophila)	protein_coding	NP_001001950.1	ZDB-GENE-030708-2	2.44768	4.22912	7.62084e-09	9.36815e-08	4.78299	3.56528	1133	387	5.98796	2.12557	10.1463	3.29925
368316	NM_199430,XM_005168860	ccnb2	cyclin B2	protein_coding	NP_955462.1;XP_005168917.1	ZDB-GENE-030429-12	-15.5611	2.45067	3.47647e-36	2.49558e-34	0.727412	3.49177	28	366	0.27771	3.96051	0.470565	6.14739
368320	NM_200086,NM_200086_dup1,XM_021468008	gmnn	geminin, DNA replication inhibitor	protein_coding	NP_956380.1;XP_021323683.1	ZDB-GENE-030429-30	-2.64589	1.49108	2.80743e-06	2.22994e-05	1.33462	2.33128	65	144	0.99317	2.2496	1.68287	0.361259
368326	NM_001113731,NM_001113731_dup1,NM_001113731_dup2,NM_001113731_dup3	il13ra2	interleukin 13 receptor, alpha 2	protein_coding	NP_001107203.1	ZDB-GENE-030521-10	-2.02107	2.43698	6.2978e-05	0.000366524	2.18882	3.03508	152	257	1.79028	3.16414	1.93895	4.91129
368397	NM_001045280,NM_001045280_dup1,XM_005170678,XM_009298029	pkp3a	plakophilin 3a	protein_coding	NP_001038745.1	ZDB-GENE-060512-114	-2.57742	7.34585	7.17943e-11	1.13966e-09	6.52241	7.87874	3883	8369	15.7992	35.0734	26.7709	54.44
368449	NM_200089,NM_200089_dup1	epb41l5	erythrocyte membrane protein band 4.1 like 5	protein_coding	NP_956383.1	ZDB-GENE-030616-450	2.49778	7.01642	3.15102e-10	4.6314e-09	7.53764	6.22854	7892	2642	30.0556	10.4764	23.3998	13.0322
368450	NM_001007168,XM_005171273	ing5b	inhibitor of growth family, member 5b	protein_coding	NP_001007169.1;XP_005171330.1	ZDB-GENE-030616-462	-3.09284	2.1198	1.96332e-09	2.60205e-08	1.63575	2.91166	90	233	1.23154	3.36943	2.08678	5.22993
368461	NM_001004502	lpar1	lysophosphatidic acid receptor 1	protein_coding	NP_001004502.2	ZDB-GENE-030616-499	-4.98894	-0.573566	1.71074e-05	0.000113222	0.275901	1.04554	9	38	0.078618	0.365931	0.133213	0.567989
368478	NM_200090	wdr75	WD repeat domain 75	protein_coding	NP_956384.1	ZDB-GENE-030616-5	-3.90467	6.18902	6.97046e-20	2.43538e-18	4.94201	6.87198	1270	4147	7.09646	24.1418	12.0246	37.4723
368485	XM_002666654,XM_005162744,XM_021470320,XM_021473782,XM_021474549	ctnnd2a	catenin (cadherin-associated protein), delta 2a, transcript variant X5	protein_coding	XP_021330224.1	ZDB-GENE-030616-60	-2.35427	5.08938	9.91103e-09	1.19051e-07	4.41135	5.60722	866	1705	2.97697	6.32605	5.04431	9.81912
368511	NM_001005573,NM_001005573_dup1	tmub2	transmembrane and ubiquitin-like domain containing 2	protein_coding	NP_001005573.1	ZDB-GENE-030616-254	-2.97395	1.37541	2.21429e-07	2.14031e-06	1.19403	2.27396	55	137	0.8175	2.11438	1.38521	3.28189
368567	NM_001309642,XM_009304099	si:busm1-37i06.3	si:busm1-37i06.3	protein_coding	NP_001296571.1;XP_009302374.1	ZDB-GENE-030616-441	4.40527	-2.22328	0.0443061	0.100975	0.330654	0.0786196	11	2	0.154121	0.021395	0.26115	0.033208
368621	NM_001004512	si:busm1-57f23.1	si:busm1-57f23.1	protein_coding	NP_001004512.2	ZDB-GENE-030616-512	-5.40557	7.95141	2.31502e-29	1.28814e-27	6.29048	8.70987	3300	14917	55.4886	261.221	94.0225	405.461
368645	NM_001003574,NM_001004514	tmem267	transmembrane protein 267	protein_coding	NP_001003574.1;NP_001004514.1	ZDB-GENE-030616-546	-2.22851	-0.13341	0.00795583	0.0245864	0.621602	1.14023	23	43	0.277281	0.550141	0.469839	0.853915
368662	NM_207641	ptf1a	pancreas specific transcription factor, 1a	protein_coding	NP_997524.1	ZDB-GENE-030616-579	2.60201	-1.2706	0.048953	0.109465	0.599476	0.258248	22	7	0.280402	0.094342	0.475127	0.146435
368669	NM_001007180,NM_001007180_dup1	si:ch211-14a17.7	si:ch211-14a17.7	protein_coding	NP_001007181.1	ZDB-GENE-030616-590	-37.2868	2.85613	3.92317e-53	5.00097e-51	0.459082	3.91512	16	503	0.226064	7.49514	0.383053	11.6338
368672	NM_001004640	atad1a	ATPase family, AAA domain containing 1a	protein_coding	NP_001004640.1	ZDB-GENE-030616-593	-2.53496	1.26088	1.34519e-05	9.14161e-05	1.22327	2.13371	57	121	0.585406	1.30548	0.991939	2.02633
368684	NM_001005304,NM_001005304_dup1,NM_001005304_dup2,NM_001005304_dup3,XM_005167970,XM_021478625	scel	sciellin	protein_coding	NP_001005304.1;XP_005168027.1;XP_021334300.1	ZDB-GENE-030616-15	-2.08313	5.46312	6.28014e-07	5.63525e-06	4.88712	5.92038	1221	2127	8.10716	14.7036	8.46941	14.0569
368709	NM_001007209,NM_001007210,XM_005170975,XM_021481071	si:busm1-105l16.2	si:busm1-105l16.2	protein_coding	NP_001007210.1;NP_001007211.1;XP_005171032.1;XP_021336746.1	ZDB-GENE-030616-108	-2.29984	2.04702	7.87449e-06	5.65275e-05	1.79998	2.7469	106	204	1.02905	2.08525	1.74367	3.23667
368717	NM_001326476,NM_001326476_dup1	itpka	inositol-trisphosphate 3-kinase A	protein_coding	NP_001313405.1	ZDB-GENE-030616-116	-2.01299	3.05189	2.23586e-05	0.000144033	2.69588	3.58897	234	394	1.25691	2.20648	2.12977	3.05769
368752	NM_001007051,NM_001007051_dup1	vat1	vesicle amine transport 1	protein_coding	NP_001007052.3	ZDB-GENE-030616-178	2.30657	6.14597	1.12391e-08	1.33706e-07	6.63954	5.45251	4215	1528	15.1146	5.70426	10.8663	4.67703
368823	NM_001012249,NM_001012249_dup1,XM_005165698	fkbp11	FK506 binding protein 11	protein_coding	NP_001012249.1;XP_005165755.1	ZDB-GENE-030616-357	-3.36321	2.47234	1.66471e-11	2.83055e-10	1.81926	3.24991	108	304	1.93586	5.94993	2.24091	8.40417
368851	NM_001003823	coch	coagulation factor C homolog, cochlin (Limulus polyphemus)	protein_coding	NP_001003823.1	ZDB-GENE-030616-403	3.87898	6.18931	1.17897e-19	4.03622e-18	6.86928	4.94859	4950	1067	42.6121	9.5592	72.2039	14.8375
368889	NM_001007174	lgalslb	lectin, galactoside-binding-like b	protein_coding	NP_001007175.1	ZDB-GENE-030616-570	-3.72513	-1.40652	0.00662995	0.0210233	0.189666	0.615481	6	19	0.211476	0.689057	0.358334	1.06953
368914	NM_001327763,XM_009307389	si:ch211-217g15.3	si:ch211-217g15.3	protein_coding	NP_001314692.1;XP_009305664.1	ZDB-GENE-030616-619	-5.5294	-0.0656346	8.08101e-08	8.37281e-07	0.35727	1.36076	12	56	0.141591	0.774812	0.239918	1.20264
369195	NM_194386	tgfb3	transforming growth factor, beta 3	protein_coding	NP_919367.2	ZDB-GENE-030723-4	2.00916	6.55305	1.51227e-06	1.25871e-05	6.98074	5.98559	5351	2227	41.275	17.8802	69.9382	27.7532
369197	NM_194387,NM_194387_dup1	stat5a	signal transducer and activator of transcription 5a	protein_coding	NP_919368.2	ZDB-GENE-030820-2	-4.19123	0.845695	6.90293e-09	8.54558e-08	0.747673	1.94724	29	102	0.158512	0.583183	0.268591	0.905201
373087	NM_194390	znfl2a	zinc finger-like gene 2a	protein_coding	NP_919371.2	ZDB-GENE-030828-7	23.2698	1.1098	1.80455e-23	7.66768e-22	2.31639	0.224067	170	6	2.46767	0.080068	4.18134	0.12428
373095	NM_194392	tpbga	trophoblast glycoprotein a	protein_coding	NP_919373.2	ZDB-GENE-030827-4	-4.21757	-1.5091	0.00423033	0.0143766	0.159737	0.588867	5	18	0.039661	0.162806	0.067203	0.252704
373099	NM_194393	guca1c	guanylate cyclase activator 1C	protein_coding	NP_919374.1	ZDB-GENE-030829-1	2.05124	7.4765	6.26249e-07	5.62181e-06	7.90908	6.87886	10222	4167	87.3754	37.0872	148.053	57.5658
373121	NM_194402	mknk2b	MAP kinase interacting serine/threonine kinase 2b	protein_coding	NP_919383.1	ZDB-GENE-030829-2	-2.77454	6.52077	3.31435e-12	6.1365e-11	5.63333	7.08692	2077	4819	15.1945	36.7114	25.7463	56.9824
373136	NM_001118897	evpla	envoplakin a	protein_coding	NP_001112369.1	ZDB-GENE-030829-19	-2.74801	6.34291	5.639e-12	1.01807e-10	5.46915	6.90674	1849	4249	3.80142	9.0958	6.44131	14.1182
373879	NM_194413,NM_194413_dup1,XM_021476027	p2rx5	purinergic receptor P2X, ligand-gated ion channel, 5	protein_coding	NP_919394.2;XP_021331702.1	ZDB-GENE-030319-5	7.70757	-0.536144	5.63142e-07	5.11644e-06	1.07079	0.189057	47	5	0.309988	0.032531	0.525259	0.050494
378452	NM_194422	cdh17	cadherin 17, LI cadherin (liver-intestine)	protein_coding	NP_919403.1	ZDB-GENE-030910-3	-4.10753	2.65748	3.32016e-15	8.14853e-14	1.79025	3.4737	105	361	0.488352	1.75036	0.827487	2.71685
378718	NM_197935,XM_009292744	drd2l	dopamine receptor D2 like	protein_coding	NP_922917.1;XP_009291019.1	ZDB-GENE-030910-1	2.8781	-0.372944	0.00191784	0.00727858	1.03826	0.447893	45	13	0.110792	0.033691	0.187732	0.052295
378719	NM_197936,NM_197936_dup1,XM_021476029	drd2b	dopamine receptor D2b	protein_coding	NP_922918.1;XP_021331704.1	ZDB-GENE-030910-2	-2.12289	2.30379	2.94182e-05	0.000184043	2.04887	2.93826	134	238	0.636328	0.965402	0.562302	1.1305
378727	NM_214751,XM_021476798	pck1	phosphoenolpyruvate carboxykinase 1 (soluble)	protein_coding	NP_999916.1;XP_021332473.1	ZDB-GENE-030909-11	-3.75614	3.69478	4.15751e-16	1.10271e-14	2.68542	4.42052	232	729	1.38588	4.53928	2.3483	7.04575
378962	NM_200551	pah	phenylalanine hydroxylase	protein_coding	NP_956845.1	ZDB-GENE-031006-2	-51.8518	4.89682	1.66307e-87	5.55227e-85	1.08678	5.89345	48	2087	0.341336	15.6631	0.578376	24.3119
378986	NM_001194989	fga	fibrinogen alpha chain	protein_coding	NP_001181918.1	ZDB-GENE-031010-21	-31.3657	4.3854	1.35329e-70	2.7369e-68	1.19403	5.3748	55	1446	0.362137	9.92547	0.613622	15.406
386701	NM_198818,XM_005173471	tubb5	tubulin, beta 5	protein_coding	NP_942113.1;XP_005173528.1	ZDB-GENE-031110-4	2.80164	6.79933	1.95083e-12	3.67998e-11	7.36682	5.89616	7006	2091	47.7944	14.7987	80.9851	22.9701
386702	NM_198981	sprn	shadow of prion protein	protein_coding	NP_945332.2	ZDB-GENE-031110-1	2.09504	3.4408	4.67316e-06	3.52928e-05	3.96458	2.9951	624	249	7.01506	2.91251	11.8867	4.52072
386705	NM_198819	ptk2aa	protein tyrosine kinase 2aa	protein_coding	NP_942114.1	ZDB-GENE-031114-5	-2.34744	2.92603	3.72003e-07	3.47594e-06	2.46451	3.53771	193	379	1.01607	2.07595	1.72168	3.22223
386710	NM_198877	mibp2	muscle-specific beta 1 integrin binding protein 2	protein_coding	NP_942578.1	ZDB-GENE-031113-14	-6.90399	9.6376	3.39477e-37	2.55008e-35	7.66211	10.4435	8607	49690	127.687	767.634	216.359	1191.5
386763	XM_017353716,XM_017353717,XM_021469883,XM_021469884,XM_021469885,XM_021469886	tead3a	TEA domain family member 3 a, transcript variant X2	protein_coding	XP_017209205.1;XP_017209206.1;XP_021325558.1;XP_021325559.1;XP_021325560.1;XP_021325561.1	ZDB-GENE-031112-10	2.08758	3.01179	9.67186e-06	6.79458e-05	3.56297	2.62776	462	185	0.903589	0.375378	1.53109	0.582651
386801	NM_200113,XM_021478627	agps	alkylglycerone phosphate synthase	protein_coding	NP_956407.1;XP_021334302.1	ZDB-GENE-031118-14	-2.05184	2.02732	0.000102313	0.00056467	1.86635	2.68542	113	194	0.828014	1.51589	1.40303	2.35293
386817	XM_017356632,XM_017356633,XM_017356634,XM_017356636,XM_017356637,XM_017356638,XM_017356639,XM_021477152,XM_021477154	shroom2a	shroom family member 2a, transcript variant X1	protein_coding	XP_017212121.1;XP_017212122.1;XP_017212123.1;XP_017212125.1;XP_017212126.1;XP_017212127.1;XP_017212128.1;XP_021332827.1;XP_021332829.1	ZDB-GENE-050208-128	2.38287	6.50051	2.66631e-09	3.47463e-08	7.00514	5.76784	5443	1910	13.0117	4.59963	22.0476	7.13941
386897	NM_207063	asf1ba	anti-silencing function 1Ba histone chaperone	protein_coding	NP_996946.1	ZDB-GENE-031118-197	-2.00099	2.25771	0.000125805	0.000680744	2.05702	2.87358	135	226	1.54011	2.67835	2.60963	4.15726
386937	XM_009291474,XM_009291475	dscamb	Down syndrome cell adhesion molecule b, transcript variant X2	protein_coding	XP_009289749.1;XP_009289750.1	ZDB-GENE-031118-67	2.18803	6.85292	6.72712e-08	7.05694e-07	7.31811	6.19915	6772	2588	13.0353	5.18615	22.0876	8.04981
386966	NM_200119,NM_200119_dup1	erbb2	erb-b2 receptor tyrosine kinase 2	protein_coding	NP_956413.2	ZDB-GENE-031118-121	-3.21387	0.857755	8.56416e-07	7.49293e-06	0.882056	1.89389	36	97	0.139283	0.394816	0.236008	0.612822
386968	NM_200121,XM_017358207,XM_021479558	calcoco1b	calcium binding and coiled-coil domain 1b	protein_coding	NP_956415.2;XP_017213696.1;XP_021335233.1	ZDB-GENE-031118-126	2.0977	3.574	3.51462e-06	2.73586e-05	4.09089	3.11186	685	273	3.72275	1.73013	6.30801	2.68547
387260	NM_198921,XM_009305694,XM_017357939,XM_017357940	scarb1	scavenger receptor class B, member 1	protein_coding	NP_944603.2;XP_009303969.1;XP_017213428.1;XP_017213429.1	ZDB-GENE-031126-1	-3.52502	4.04502	2.37125e-15	5.88142e-14	3.05008	4.73765	311	917	1.84507	5.65062	3.12638	8.77073
387297	NM_198983,NM_198983_dup1	p2rx2	purinergic receptor P2X, ligand-gated ion channel, 2	protein_coding	NP_945334.1	ZDB-GENE-030319-2	-2.72965	-0.351333	0.00191784	0.00727858	0.48345	1.06498	17	39	0.193949	0.485965	0.328636	0.754301
387365	NM_001305618,NM_001305618_dup1	gpc3	glypican 3	protein_coding	NP_001292547.1	ZDB-GENE-031212-1	3.88971	-1.56307	0.0153481	0.0424871	0.530986	0.153175	19	4	0.101328	0.018708	0.171694	0.029038
387529	NM_001030283,XM_005163870	ldlra	low density lipoprotein receptor a	protein_coding	NP_001025454.1;XP_005163927.1	ZDB-GENE-031217-1	-3.93724	3.43824	1.7855e-16	4.87683e-15	2.42731	4.18984	187	616	0.582932	2.00346	0.987747	3.10971
387533	NM_207642,NM_207642_dup1,XM_005167541,XM_005167542,XM_021478628,XM_021478629	gja3	gap junction protein, alpha 3	protein_coding	NP_997525.1;XP_005167598.1;XP_005167599.1;XP_021334303.1;XP_021334304.1	ZDB-GENE-031217-3	-1232.69	4.03689	3.71159e-99	2.00169e-96	0.0333936	5.07862	1	1171	0.007932	6.81669	0.013441	6.19601
387591	NM_199279,XM_021468374	ivns1abpa	influenza virus NS1A binding protein a	protein_coding	NP_954973.2;XP_021324049.1	ZDB-GENE-031222-2	-2.25851	10.0781	1.42564e-08	1.66217e-07	9.376	10.5502	28332	53507	132.296	260.168	224.168	403.826
393096	NM_200128	lipg	lipase, endothelial	protein_coding	NP_956422.1	ZDB-GENE-040426-699	-2.1212	4.41809	7.99399e-07	7.02916e-06	3.87532	4.90745	584	1036	4.03508	7.45221	6.83723	11.5671
393098	NM_200130,XM_005172440,XM_017357291	ctu1	cytosolic thiouridylase subunit 1 homolog (S. pombe)	protein_coding	NP_956424.1;XP_005172497.3;XP_017212780.1	ZDB-GENE-040426-704	-2.12916	1.53437	0.000200986	0.00102332	1.49902	2.29057	78	139	0.729426	1.43412	1.23597	2.226
393114	NM_200145,NM_200145_dup1	zgc:55888	zgc:55888	protein_coding	NP_956439.2	ZDB-GENE-040426-834	-3.14611	3.08385	1.18001e-11	2.04104e-10	2.34326	3.78927	174	458	1.50636	4.13701	2.50848	6.32534
393132	NM_200163	irak4	interleukin-1 receptor-associated kinase 4	protein_coding	NP_956457.1	ZDB-GENE-040426-738	2.18023	2.37546	1.5213e-05	0.000102098	3.0045	2.07738	300	115	2.93661	1.17296	4.97593	1.82064
393135	NM_200166,XM_001923225,XM_005157754,XM_017359222,XM_017359223	zgc:55621	zgc:55621	protein_coding	NP_956460.2;XP_001923260.2;XP_005157811.1;XP_017214711.1;XP_017214712.1	ZDB-GENE-040426-762	-4.57408	1.66185	6.03215e-13	1.1958e-11	1.08678	2.62121	48	184	0.49864	2.21863	0.844921	3.4437
393136	NM_200167,NM_200167_dup1,NM_200167_dup2,XM_005162839,XM_005162840,XM_017353805	cpne3	copine III	protein_coding	NP_956461.1;XP_005162896.1;XP_005162897.1;XP_017209294.1	ZDB-GENE-040426-763	-2.78158	4.65935	2.08411e-11	3.49006e-10	3.84273	5.25296	570	1326	3.20723	7.9511	3.88314	9.01565
393140	NM_200171	lsm14b	LSM family member 14B	protein_coding	NP_956465.2	ZDB-GENE-040426-779	-5.33324	2.8816	1.53176e-20	5.65219e-19	1.73042	3.74175	99	442	0.897153	4.18759	1.52018	6.49986
393147	NM_200178,NM_200178_dup1	acad11	acyl-CoA dehydrogenase family, member 11	protein_coding	NP_956472.1	ZDB-GENE-040426-814	-3.48156	0.982979	8.65966e-08	8.92837e-07	0.900271	2.00877	37	108	0.248584	0.762158	0.322638	0.983716
393150	NM_200181,XM_005163002,XM_009297893,XM_021470457	sh3gl3b	SH3-domain GRB2-like 3b	protein_coding	NP_956475.2;XP_005163059.1;XP_009296168.1;XP_021326132.1	ZDB-GENE-040121-4	2.00211	2.45653	8.3061e-05	0.000469756	3.0419	2.20554	309	129	2.59755	1.13606	4.40141	1.76336
393166	NM_200197,XM_009300367,XM_021474968	tmem110l	transmembrane protein 110, like	protein_coding	NP_956491.1;XP_009298642.1;XP_021330643.1	ZDB-GENE-040426-912	2.0104	3.12234	2.25026e-05	0.000144828	3.64897	2.75291	493	205	2.49467	1.16751	4.22708	1.81218
393208	NM_201333	mios	missing oocyte, meiosis regulator, homolog (Drosophila)	protein_coding	NP_958490.1	ZDB-GENE-040426-856	2.27659	4.56947	6.59543e-08	6.9257e-07	5.08323	3.94952	1405	516	6.14368	2.34814	10.4101	3.64471
393230	NM_200260	ppp4r1	protein phosphatase 4, regulatory subunit 1	protein_coding	NP_956554.1	ZDB-GENE-040426-753	-8.7618	7.29629	1.16042e-44	1.15127e-42	5.05302	8.14535	1375	10075	7.11466	54.2873	12.0554	84.2632
393234	NM_200264	nipsnap3a	nipsnap homolog 3A (C. elegans)	protein_coding	NP_956558.2	ZDB-GENE-040426-1037	-5.71602	2.3838	1.68548e-19	5.66304e-18	1.34795	3.3	66	316	0.736372	3.7116	1.24774	5.76104
393264	NM_200294,NM_200294_dup1	uap1l1	UDP-N-acetylglucosamine pyrophosphorylase 1, like 1	protein_coding	NP_956588.1	ZDB-GENE-040426-1056	-2.38301	2.65403	4.91345e-07	4.49324e-06	2.23261	3.29589	158	315	1.3772	2.86676	0.89404	4.44971
393268	NM_200298	map1lc3c	microtubule-associated protein 1 light chain 3 gamma	protein_coding	NP_956592.1	ZDB-GENE-040426-1080	-16.2847	1.62124	2.28736e-28	1.23044e-26	0.434294	2.75889	15	206	0.283906	4.10771	0.481064	6.37588
393286	NM_200316	ttc25	tetratricopeptide repeat domain 25	protein_coding	NP_956610.1	ZDB-GENE-040426-995	2.49162	-0.858903	0.0174197	0.047124	0.767654	0.356184	30	10	0.252296	0.080943	0.427503	0.125637
393305	NM_200334	hyi	hydroxypyruvate isomerase	protein_coding	NP_956628.1	ZDB-GENE-040426-1273	-2.26302	3.42403	4.10651e-07	3.80159e-06	2.91775	3.98567	280	530	3.51349	6.92655	5.95343	10.7512
393311	NM_200340,NM_200340_dup1	plekhf1	pleckstrin homology domain containing, family F (with FYVE domain) member 1	protein_coding	NP_956634.1	ZDB-GENE-040426-1289	2.42502	2.6783	3.83103e-07	3.56856e-06	3.31739	2.23158	383	132	4.87927	1.7463	8.21912	2.71055
393317	NM_200346	diabloa	diablo, IAP-binding mitochondrial protein a	protein_coding	NP_956640.1	ZDB-GENE-040426-1303	-3.66691	3.8698	6.27333e-16	1.62897e-14	2.85843	4.58105	267	819	3.30051	10.5719	5.59253	16.4094
393329	NM_200358,NM_200358_dup1	slc10a2	solute carrier family 10 (sodium/bile acid cotransporter), member 2	protein_coding	NP_956652.1	ZDB-GENE-040426-1328	-7.30613	1.56029	1.76696e-18	5.54693e-17	0.767654	2.62121	30	184	0.248593	1.62148	0.117545	0.96857
393334	NM_200363	rassf8b	Ras association (RalGDS/AF-6) domain family (N-terminal) member 8b	protein_coding	NP_956657.1	ZDB-GENE-040426-1338	-4.87572	3.09749	1.30565e-19	4.45085e-18	1.96483	3.92313	124	506	1.13528	4.82214	1.92367	7.4848
393341	NM_200370	tmem254	transmembrane protein 254	protein_coding	NP_956664.1	ZDB-GENE-040426-1348	-2.75513	3.78143	1.88205e-10	2.83359e-09	3.05415	4.40153	312	719	2.79706	6.71349	4.73947	10.4205
393355	NM_200384,NM_200384_dup1,NM_200384_dup2,XM_005166179	mif4gda	MIF4G domain containing a	protein_coding	NP_956678.1	ZDB-GENE-040426-1382	2.16621	1.42349	0.000185926	0.000954731	2.19621	1.4072	153	59	1.61002	0.710888	1.28833	0.692454
393360	NM_200389	stn1	STN1, CST complex subunit	protein_coding	NP_956683.1	ZDB-GENE-040426-1390	-2.55648	3.07827	1.62128e-08	1.8675e-07	2.51858	3.71123	202	432	2.11932	4.72975	3.59108	7.3414
393368	NM_200397,NM_200397_dup1,NM_200397_dup2	zmynd10	zinc finger, MYND-type containing 10	protein_coding	NP_956691.1	ZDB-GENE-040426-1218	2.75741	-0.138654	0.00119594	0.00486258	1.1642	0.534119	53	16	0.548873	0.167329	0.664327	0
393383	NM_200411,XM_017358716,XM_021480542	slx4ip	SLX4 interacting protein	protein_coding	NP_956705.1;XP_017214205.1;XP_021336217.1	ZDB-GENE-040426-1365	2.0799	1.17939	0.000688767	0.00301809	1.99056	1.27988	127	51	0.722756	0.279139	1.22467	0.433272
393386	NM_200414	cybb	cytochrome b-245, beta polypeptide (chronic granulomatous disease)	protein_coding	NP_956708.1	ZDB-GENE-040426-1380	3.34314	3.29395	6.95239e-13	1.36663e-11	3.9988	2.45433	640	160	2.83408	0.73612	4.8022	1.14259
393387	NM_200415,XM_017357293	ggt1a	gamma-glutamyltransferase 1a	protein_coding	NP_956709.1;XP_017212782.1	ZDB-GENE-040426-1388	-4.23571	0.756949	8.64655e-09	1.0482e-07	0.706862	1.88297	27	96	0.09916	0.369808	0.168022	0.574005
393400	NM_200428,XM_005158890,XM_017351606	zgc:66313	zgc:66313	protein_coding	NP_956722.1;XP_005158947.1;XP_017207095.1	ZDB-GENE-040426-1606	-4.46429	3.7849	8.45206e-20	2.94325e-18	2.59325	4.55378	215	803	2.04771	7.81844	3.46973	12.1356
393416	NM_200444,XM_005162155	arhgap4a	Rho GTPase activating protein 4a	protein_coding	NP_956738.1;XP_005162212.1	ZDB-GENE-040426-1229	-6.03709	3.66857	3.48713e-26	1.73392e-24	2.20357	4.51013	154	778	0.741988	3.9083	1.25726	6.06637
393421	NM_200449,XR_002459129	etnppl	ethanolamine-phosphate phospho-lyase	protein_coding	NP_956743.1	ZDB-GENE-040426-1133	-3.00413	1.60178	5.22861e-08	5.57674e-07	1.32116	2.46168	64	161	0.570634	1.51176	0.96691	2.34651
393423	NM_200451,XM_005161293	asl	argininosuccinate lyase	protein_coding	NP_956745.1;XP_005161350.1	ZDB-GENE-040426-1152	-2.72412	4.6943	4.80155e-11	7.77452e-10	3.89589	5.27921	593	1351	5.11776	12.1675	8.67178	18.8861
393442	NM_200470,XM_009298567	crispld1b	cysteine-rich secretory protein LCCL domain containing 1b	protein_coding	NP_956764.1;XP_009296842.1	ZDB-GENE-040426-1204	-5.58941	0.65775	7.24031e-11	1.14673e-09	0.554179	1.8609	20	94	0.122807	0.60549	0.208091	0.939825
393451	NM_200479,XM_005160347	cyp46a1.4	cytochrome P450, family 46, subfamily A, polypeptide 1, tandem duplicate 4	protein_coding	NP_956773.1;XP_005160404.1	ZDB-GENE-040426-1224	2.31737	1.5598	4.35332e-05	0.000262585	2.32989	1.45219	172	62	0.888399	0.331818	1.50534	0.515039
393453	XM_005166460	znf507	zinc finger protein 507	protein_coding	XP_005166517.1	ZDB-GENE-040426-1233	-3.83394	-0.36625	5.08771e-05	0.000301351	0.383405	1.12178	13	42	0.045537	0.153468	0.07716	0.238208
393466	XM_021470556	nrcamb	neuronal cell adhesion molecule b	protein_coding	XP_021326231.1	ZDB-GENE-040426-1542	-4.45113	4.42445	4.15232e-21	1.58504e-19	3.14861	5.17123	336	1251	5.13746	19.9117	8.70516	30.9065
393486	NM_200514,XM_005172064	lgals2b	lectin, galactoside-binding, soluble, 2b	protein_coding	NP_956808.1;XP_005172121.1	ZDB-GENE-040426-1590	-4.62087	5.4197	2.06265e-23	8.72911e-22	4.01978	6.15674	650	2512	17.303	69.8749	29.319	108.458
393488	NM_200516	myl13	myosin, light chain 13	protein_coding	NP_956810.1	ZDB-GENE-040426-1593	6.30548	3.2636	6.41053e-25	2.99628e-23	4.1242	1.84973	702	93	12.9266	1.77508	21.9035	2.75524
393502	NM_200530	zgc:66455	zgc:66455	protein_coding	NP_956824.1	ZDB-GENE-040426-1642	-15.0288	0.22895	1.07797e-14	2.5192e-13	0.189666	1.65822	6	77	0.038162	0.568928	0.064663	0.883075
393511	NM_200539	stc1l	stanniocalcin 1, like	protein_coding	NP_956833.1	ZDB-GENE-040426-1521	6.48159	-1.37261	0.00106861	0.00441227	0.643394	0.116379	24	3	0.282558	0.036625	0.478779	0.056849
393517	NM_200545	nkain1	sodium/potassium transporting ATPase interacting 1	protein_coding	NP_956839.1	ZDB-GENE-040426-1472	2.10414	4.19561	1.41884e-06	1.18847e-05	4.68658	3.67373	1057	420	9.40362	3.88594	15.9339	6.03165
393519	NM_200547	purbb	purine-rich element binding protein Bb	protein_coding	NP_956841.1	ZDB-GENE-040426-1478	-2.83303	2.13344	2.74374e-08	3.05178e-07	1.70991	2.89546	97	230	0.845883	2.09256	1.43331	3.24801
393534	NM_200562,XM_005163934,XM_009299441	carhsp1	calcium regulated heat stable protein 1	protein_coding	NP_956856.2;XP_005163991.1;XP_009297716.1	ZDB-GENE-040426-1479	-22.1299	8.55951	1.33941e-79	3.61178e-77	5.07122	9.49772	1393	25780	21.7418	456.367	36.8403	708.361
393537	NM_200565	ccdc124	coiled-coil domain containing 124	protein_coding	NP_956859.1	ZDB-GENE-040426-1483	-3.89256	7.56492	3.48748e-20	1.25174e-18	6.29264	8.23966	3305	10758	36.2744	122.964	61.465	190.861
393540	NM_200568,NM_200568_dup1	zgc:77517	zgc:77517	protein_coding	NP_956862.1	ZDB-GENE-040426-1508	-3.99111	7.82469	7.19919e-21	2.69432e-19	6.52094	8.50595	3879	12946	34.7288	120.691	58.8461	187.333
393548	NM_200576	gadd45aa	growth arrest and DNA-damage-inducible, alpha, a	protein_coding	NP_956870.2	ZDB-GENE-040426-1501	-4.83717	4.56942	2.36971e-23	9.96844e-22	3.18992	5.33332	347	1404	4.36009	18.3843	7.38794	28.5356
393580	NM_200608,XM_021477437	bco1l	beta-carotene oxygenase 1, like	protein_coding	NP_956902.1;XP_021333112.1	ZDB-GENE-040426-1191	-2.85813	1.48079	4.70676e-07	4.31549e-06	1.28002	2.34725	61	146	0.446884	1.11784	0.757222	1.73508
393586	NM_200614	hsc70	heat shock cognate 70	protein_coding	NP_956908.1	ZDB-GENE-040426-1221	-47.7285	8.79055	8.33181e-109	6.04286e-106	4.26088	9.76228	776	30976	4.87894	203.002	8.26711	315.095
393594	NM_200622,NM_200622_dup1,NM_200622_dup2,XM_005157643,XM_005157644,XM_021481360	bcas3	breast carcinoma amplified sequence 3	protein_coding	NP_956916.1	ZDB-GENE-040426-1257	2.2459	3.52641	4.98393e-07	4.55571e-06	4.07494	3.01023	677	252	2.75672	1.5249	2.0755	2.32482
393608	NM_200635	ptger2a	prostaglandin E receptor 2a (subtype EP2)	protein_coding	NP_956929.1	ZDB-GENE-040426-1321	-4.0556	0.062275	2.37222e-06	1.90657e-05	0.48345	1.39188	17	58	0.114983	0.405793	0.194832	0.629861
393629	NM_200656	guca1e	guanylate cyclase activator 1e	protein_coding	NP_956950.1	ZDB-GENE-040426-1577	-2.74716	4.54408	4.16511e-11	6.78055e-10	3.74784	5.13604	531	1220	2.83527	6.78391	4.80421	10.5298
393654	NM_200681	slc5a1	solute carrier family 5 (sodium/glucose cotransporter), member 1	protein_coding	NP_956975.1	ZDB-GENE-040426-1524	-48.5502	1.83565	3.75693e-40	3.1209e-38	0.189666	2.9951	6	249	0.029776	1.53577	0.050455	2.38378
393711	NM_001328427,XM_005162489,XM_005162496,XM_005162498,XM_005162499,XM_009297227,XM_009297228,XM_009297229	abi1a	abl-interactor 1a	protein_coding	NP_001315356.1;XP_005162546.1;XP_005162553.1;XP_005162555.1;XP_005162556.1;XP_009295502.1;XP_009295503.1;XP_009295504.1	ZDB-GENE-040426-1701	-2.00623	4.72635	3.69259e-06	2.85643e-05	4.21614	5.18128	751	1260	5.35567	9.18876	9.07491	14.2625
393714	NM_200741	cdo1	cysteine dioxygenase, type I	protein_coding	NP_957035.2	ZDB-GENE-040426-1704	2.28775	7.49164	1.05818e-08	1.26674e-07	7.97367	6.78709	10692	3908	150.406	57.2381	254.854	88.8435
393724	NM_200751	rpe65a	retinal pigment epithelium-specific protein 65a	protein_coding	NP_957045.1	ZDB-GENE-040426-1717	2.25181	6.35642	2.62084e-08	2.92125e-07	6.83773	5.68231	4842	1798	43.9089	16.9731	74.4013	26.3452
393733	NM_200760,NM_200760_dup1,NM_200760_dup2	fgf1a	fibroblast growth factor 1a	protein_coding	NP_957054.1	ZDB-GENE-040426-1729	-2.19321	0.904336	0.000536778	0.00242797	1.1026	1.81571	49	90	0.440164	0.840203	0.175307	0.03514
393745	NM_200772	wars	tryptophanyl-tRNA synthetase	protein_coding	NP_957066.1	ZDB-GENE-040426-1742	-2.23408	3.07122	1.24041e-06	1.04862e-05	2.62646	3.65139	221	413	6.67469	13.0304	11.3099	20.2254
393747	NM_200774	rmnd5b	required for meiotic nuclear division 5 homolog B	protein_coding	NP_957068.1	ZDB-GENE-040426-1744	-2.06853	4.56762	1.51027e-06	1.25804e-05	4.0384	5.04107	659	1140	7.23214	13.0305	12.2545	20.2256
393761	NM_200788	rdh8b	retinol dehydrogenase 8b	protein_coding	NP_957082.2	ZDB-GENE-040426-1759	2.39314	4.80775	8.00783e-09	9.781e-08	5.33665	4.12649	1683	588	12.4772	4.53576	21.142	7.04028
393763	NM_200790	aida	axin interactor, dorsalization associated	protein_coding	NP_957084.1	ZDB-GENE-071126-2	-2.49576	5.37061	7.09295e-10	9.9391e-09	4.62356	5.90765	1010	2108	6.44204	14.008	10.9157	21.7428
393775	NM_200802	clu	clusterin	protein_coding	NP_957096.1	ZDB-GENE-040426-1774	-3.19417	10.7898	1.44311e-15	3.63073e-14	9.72306	11.3973	36049	96286	334.542	930.45	566.864	1444.22
393787	NM_200814	pcbd1	pterin-4 alpha-carbinolamine dehydratase/dimerization cofactor of hepatocyte nuclear factor 1 alpha	protein_coding	NP_957108.1	ZDB-GENE-040426-1787	-2.63242	2.88597	1.24545e-08	1.47001e-07	2.33659	3.54465	173	381	3.88258	8.91473	6.57882	13.8372
393799	NM_200826,XM_021469847	pycr1a	pyrroline-5-carboxylate reductase 1a	protein_coding	NP_957120.1;XP_021325522.1	ZDB-GENE-040426-1675	-2.18843	4.02793	4.28839e-07	3.95604e-06	3.48667	4.54516	436	798	2.67118	5.07343	4.52617	7.87484
393813	NM_200840	pdlim7	PDZ and LIM domain 7	protein_coding	NP_957134.1	ZDB-GENE-040426-2092	-2.1674	1.39773	0.000171565	0.00088869	1.40008	2.18791	70	127	0.369831	0.707119	0.626659	1.09757
393832	NM_200858,XM_009299220	zgc:77748	zgc:77748	protein_coding	NP_957152.1;XP_009297495.1	ZDB-GENE-040426-1864	-3.68833	0.841357	5.42692e-08	5.7707e-07	0.806805	1.91547	32	99	0.291093	0.941194	0.493242	1.4609
393837	NM_200863	c8g	complement component 8, gamma polypeptide	protein_coding	NP_957157.1	ZDB-GENE-040426-1898	-21.6127	1.28236	5.78936e-27	2.94837e-25	0.275901	2.49072	9	165	0.09352	1.97258	0.158465	3.06178
393838	NM_200864,XM_009303728,XM_021478218,XM_021478219	mtmr3	myotubularin related protein 3	protein_coding	NP_957158.2;XP_009302003.1;XP_021333893.1;XP_021333894.1	ZDB-GENE-091204-465	-9.6185	5.99282	1.45116e-45	1.48166e-43	3.69925	6.86229	512	4119	1.42725	13.6682	2.41839	21.2154
393843	NM_200869,XM_005161625,XM_005161626,XM_005161627	dnase1l4.2	deoxyribonuclease 1 like 4, tandem duplicate 2	protein_coding	NP_957163.1;XP_005161682.1;XP_005161683.1;XP_005161684.1	ZDB-GENE-040426-1884	2.18217	2.28693	1.67545e-05	0.000111237	2.92666	2.00877	282	108	2.43189	0.968103	4.1207	1.50266
393848	NM_200874,NM_200874_dup1,XM_009306595,XM_021480040,XM_021480041,XM_021480042,XM_021480043,XM_021480044	arhgap12b	Rho GTPase activating protein 12b	protein_coding	NP_957168.1	ZDB-GENE-040426-1727	-2.34583	7.45626	3.83341e-09	4.89546e-08	6.72729	7.94958	4482	8792	16.0118	32.6119	27.1311	40.134
393850	NM_200876	dhx38	DEAH (Asp-Glu-Ala-His) box polypeptide 38	protein_coding	NP_957170.1	ZDB-GENE-040426-1144	-2.10355	2.19547	4.20906e-05	0.000254614	1.97346	2.84012	125	220	0.425993	0.78272	0.721823	1.21492
393851	NM_200877,XM_021468019	klhl7	kelch-like family member 7	protein_coding	NP_957171.1;XP_021323694.1	ZDB-GENE-130212-1	-2.69666	1.44343	1.94398e-06	1.58664e-05	1.29386	2.29881	62	140	0.376095	0.948046	0.637273	1.47153
393856	NM_200882,XM_021468020	pabpc1b	poly A binding protein, cytoplasmic 1 b	protein_coding	NP_957176.1;XP_021323695.1	ZDB-GENE-050308-1	-2.13612	8.7325	1.27803e-07	1.28126e-06	8.08871	9.18089	11583	20690	65.211	121.511	110.497	188.607
393861	NM_200887	hhatla	hedgehog acyltransferase-like, a	protein_coding	NP_957181.1	ZDB-GENE-040426-1865	3.87283	3.71294	1.74611e-16	4.77581e-15	4.4412	2.66646	885	191	6.79055	1.52185	11.5062	2.36217
393867	NM_200893,XM_017357297,XM_017357298,XM_017357299,XM_017357300	ampd1	adenosine monophosphate deaminase 1 (isoform M)	protein_coding	NP_957187.1;XP_017212786.1;XP_017212787.1;XP_017212788.1;XP_017212789.1	ZDB-GENE-040426-1906	3.74231	4.50192	3.98681e-17	1.1347e-15	5.19535	3.39523	1522	340	9.4952	2.20421	16.0891	3.42131
393868	NM_200894,XM_009304092,XM_021472110,XM_021472111	zgc:77614	zgc:77614, transcript variant X2	protein_coding	XP_021327785.1;XP_021327786.1	ZDB-GENE-040426-1844	2.59629	-0.117473	0.00196109	0.00741596	1.1642	0.561752	53	17	0.760273	0.251255	1.28824	0.389992
393871	NM_200897	csrp2	cysteine and glycine-rich protein 2	protein_coding	NP_957191.1	ZDB-GENE-040426-1863	-2.74042	4.66617	3.81672e-11	6.22786e-10	3.86376	5.25402	579	1327	10.0825	24.059	17.0843	37.3437
393874	NM_200900	tmem38a	transmembrane protein 38A	protein_coding	NP_957194.1	ZDB-GENE-040426-1888	2.77279	2.98041	1.94187e-09	2.5785e-08	3.64358	2.36304	491	148	5.44789	1.70469	9.23117	2.64598
393877	NM_200903,NM_200903_dup1	derl3	derlin 3	protein_coding	NP_957197.2	ZDB-GENE-040426-1324	-6.11507	3.90903	2.04065e-27	1.05717e-25	2.38267	4.74369	180	921	1.58879	8.50576	1.5332	3.38795
393891	NM_200917	fbxo32	F-box protein 32	protein_coding	NP_957211.1	ZDB-GENE-040426-1040	-2.34606	2.66531	7.8726e-07	6.92822e-06	2.25401	3.3	161	316	1.42055	2.90776	2.40704	4.51334
393892	NM_200918,XM_005159605,XM_005159606,XM_005159607,XM_021468021	bzw2	basic leucine zipper and W2 domains 2	protein_coding	NP_957212.1;XP_005159662.1;XP_005159663.1;XP_005159664.1;XP_021323696.1	ZDB-GENE-040426-746	2.17283	6.75876	8.92975e-08	9.17535e-07	7.22137	6.11305	6330	2436	55.6607	22.7945	94.3142	35.3809
393910	NM_200936,NM_200936_dup1,XM_005169269,XM_005169270,XM_021479565,XM_021479566	sulf2a	sulfatase 2a	protein_coding	NP_957230.1	ZDB-GENE-040426-759	4.18807	2.30693	7.56916e-14	1.62783e-12	3.14861	1.52418	336	67	1.35282	0.27365	1.56878	0.339778
393915	NM_200941	rabgef1l	RAB guanine nucleotide exchange factor (GEF) 1, like	protein_coding	NP_957235.1	ZDB-GENE-040426-813	-2.38839	1.17619	4.81893e-05	0.000287945	1.20872	2.04838	56	112	0.414576	0.868897	0.702477	1.34868
393932	NM_001320529	slc15a4	solute carrier family 15 (oligopeptide transporter), member 4	protein_coding	NP_001307458.1	ZDB-GENE-040426-1047	-3.95766	0.731583	3.8349e-08	4.18359e-07	0.727412	1.84973	28	93	0.142364	0.49721	0.241229	0.771755
393961	NM_200986	tcea2	transcription elongation factor A (SII), 2	protein_coding	NP_957280.2	ZDB-GENE-040426-985	-3.22403	5.26522	8.99582e-15	2.12834e-13	4.26264	5.89887	777	2095	6.94902	19.5291	11.7747	30.3125
393975	NM_201000	bag2	BCL2-associated athanogene 2	protein_coding	NP_957294.2	ZDB-GENE-040426-1399	-112.952	2.7779	5.93891e-62	9.91373e-60	0.159737	3.86609	5	485	0.089205	9.04799	0.151154	14.044
393995	NM_201020	gpc1b	glypican 1b	protein_coding	NP_957314.1	ZDB-GENE-040426-1306	-3.88743	3.86436	3.93625e-17	1.12183e-15	2.79656	4.59281	254	826	1.61777	5.48077	2.74123	8.50711
393997	NM_201022	lipca	lipase, hepatic a	protein_coding	NP_957316.1	ZDB-GENE-040426-1361	-7.06436	1.46987	1.45503e-17	4.3043e-16	0.747673	2.54018	29	172	0.265748	1.64911	0.450296	2.5597
394012	NM_001324498,XM_021480544	itga9	integrin, alpha 9	protein_coding	NP_001311427.1;XP_021336219.1	ZDB-GENE-040426-1129	2.04671	2.82904	2.55694e-05	0.000162379	3.38686	2.49072	404	165	0.813415	0.356306	1.37829	0.553049
394015	NM_201040,XM_017357301	def6a	differentially expressed in FDCP 6a homolog (mouse)	protein_coding	NP_957334.1;XP_017212790.1	ZDB-GENE-040426-1246	2.2791	1.18338	0.000150485	0.000794294	2.02417	1.22908	131	48	0.91672	0.349947	1.55333	0.543179
394023	NM_001320534	pdia2	protein disulfide isomerase family A, member 2	protein_coding	NP_001307463.1	ZDB-GENE-040426-705	-4.59521	0.901676	5.40176e-10	7.70273e-09	0.727412	2.00877	28	108	0.233806	0.939635	0.396172	1.45848
394043	NM_201068	ephx1	epoxide hydrolase 1, microsomal (xenobiotic)	protein_coding	NP_957362.1	ZDB-GENE-040426-913	-2.94877	5.79952	2.91146e-13	5.95108e-12	4.86758	6.39477	1204	2969	8.83299	22.6924	14.967	35.2225
394052	NM_201077	ftcd	formimidoyltransferase cyclodeaminase	protein_coding	NP_957371.2	ZDB-GENE-030131-9643	-3.15953	0.878203	1.13397e-06	9.64056e-06	0.900271	1.90472	37	98	0.333931	0.920558	0.565828	1.42887
394093	NM_201118,NM_201118_dup1	ambp	alpha-1-microglobulin/bikunin precursor	protein_coding	NP_957412.2	ZDB-GENE-040426-1608	-2.44712	4.37989	5.08108e-09	6.3956e-08	3.70704	4.93148	515	1054	6.14856	13.1018	10.4184	20.3362
394120	NM_201145	nudt3a	nudix (nucleoside diphosphate linked moiety X)-type motif 3a	protein_coding	NP_957439.1	ZDB-GENE-040426-792	-2.53758	2.89703	3.53579e-08	3.87537e-07	2.37617	3.54119	179	380	0.817226	1.80274	1.38475	2.79816
394142	NM_201167,XM_005171729	hpda	4-hydroxyphenylpyruvate dioxygenase a	protein_coding	NP_957461.1;XP_005171786.1	ZDB-GENE-040426-986	-7.14541	2.70352	2.88726e-25	1.36774e-23	1.37425	3.63197	68	407	0.574048	3.6808	0.972694	5.71324
394170	NM_201195,NM_201195_dup1,XM_017353700	nme4	NME/NM23 nucleoside diphosphate kinase 4	protein_coding	NP_957489.1;XP_017209189.1	ZDB-GENE-040426-1043	-4.83536	-0.110084	6.52268e-07	5.83049e-06	0.383405	1.31278	13	53	0.145519	0.680358	0.246574	1.05603
394174	NM_201199	pik3cd	phosphatidylinositol-4,5-bisphosphate 3-kinase, catalytic subunit delta	protein_coding	NP_957493.1	ZDB-GENE-040426-1128	2.97568	2.89206	2.94613e-10	4.35154e-09	3.58566	2.23158	470	132	1.45652	0.425318	2.46799	0.660167
394198	NM_205569	fosab	v-fos FBJ murine osteosarcoma viral oncogene homolog Ab	protein_coding	NP_991132.1	ZDB-GENE-031222-4	-6.65748	6.83603	2.08344e-35	1.4607e-33	4.94639	7.64118	1274	7093	11.7187	67.9634	19.8567	105.491
394209	XM_002662826,XM_002662827,XM_005172336,XM_021477800,XM_021477801,XM_021477802	sb:cb1058	sb:cb1058, transcript variant X3	protein_coding	XP_002662872.1;XP_002662873.1;XP_005172393.1	ZDB-GENE-040108-9	-2.55906	2.70831	4.74052e-08	5.08193e-07	2.21816	3.372	156	334	1.5555	3.4404	2.63571	5.34009
399645	NM_212804	insig2	insulin induced gene 2	protein_coding	NP_997969.1	ZDB-GENE-040202-1	-2.30317	0.21722	0.00197447	0.00745582	0.747673	1.36076	29	56	0.434631	0.882583	0.736459	1.36992
399692	NM_212806,XM_005156809	cyp17a1	cytochrome P450, family 17, subfamily A, polypeptide 1	protein_coding	NP_997971.2;XP_005156866.1	ZDB-GENE-040213-2	-2.44804	0.690171	0.000200148	0.0010193	0.936025	1.69612	39	80	0.197068	0.425386	0.333922	0.660272
402785	NM_203420	bicc2	bicaudal C homolog 2	protein_coding	NP_981965.1	ZDB-GENE-110110-3	4.71783	-0.661606	8.39027e-05	0.000473625	0.953575	0.258248	40	7	0.207598	0.035134	0.351765	0.054534
402795	XM_005168397,XM_021471215,XR_002458985	sts	steroid sulfatase (microsomal), isozyme S, transcript variant X1	protein_coding	XP_005168454.1	ZDB-GENE-030717-5	-2.20846	2.63177	4.63276e-06	3.50129e-05	2.27511	3.24566	164	303	1.16719	2.15598	1.97774	3.34645
402805	NM_205572,XM_005164288	pvalb1	parvalbumin 1	protein_coding	NP_991135.1;XP_005164345.1	ZDB-GENE-040625-57	80.489	7.59283	2.56292e-123	2.6953e-120	8.57809	2.51919	16278	169	371.068	3.98201	628.754	6.18077
402807	NM_205574,NM_205574_dup1,XM_005161792	pvalb7	parvalbumin 7	protein_coding	NP_991137.2;XP_005161849.1	ZDB-GENE-040718-285	-2.25875	3.37519	5.01755e-07	4.58446e-06	2.87694	3.93902	271	512	4.28427	8.99044	5.50401	8.51489
402820	NM_205581	tmsb	thymosin, beta	protein_coding	NP_991144.1	ZDB-GENE-050307-5	6.51018	3.66797	1.8365e-27	9.56117e-26	4.51693	2.12447	935	120	37.9869	5.07224	64.3669	7.87299
402837	NM_001289794,NM_205583,XM_005170767	hamp	hepcidin antimicrobial peptide	protein_coding	NP_001276723.1;NP_991146.1;XP_005170824.1	ZDB-GENE-050726-1	4.20581	0.546925	1.38077e-07	1.37769e-06	1.69955	0.615481	96	19	2.13305	0.450948	3.61434	0.69995
402841	NM_203460,NM_203460_dup1,XM_021480549	adh8b	alcohol dehydrogenase 8b	protein_coding	NP_982285.1	ZDB-GENE-030529-2	-2.48602	4.29468	3.15113e-09	4.06861e-08	3.61353	4.85537	480	998	4.959	10.7172	7.99317	16.6349
402843	NM_205585,NM_205585_dup1	sfrp1a	secreted frizzled-related protein 1a	protein_coding	NP_991148.1	ZDB-GENE-040310-5	-3.67215	0.432488	9.16076e-07	7.96191e-06	0.643394	1.6193	24	74	0.459296	0.770616	0.621436	1.19613
402847	NM_001256177,NM_001256177_dup1	cyp2x7	cytochrome P450, family 2, subfamily X, polypeptide 7	protein_coding	NP_001243106.1	ZDB-GENE-110114-2	-3.09787	0.307627	2.84783e-05	0.000179015	0.664862	1.49581	25	65	0.210041	0.569837	0.355903	0.884486
402854	NM_001172565	ak7a	adenylate kinase 7a	protein_coding	NP_001166036.1	ZDB-GENE-040724-122	-2.20008	1.12094	0.000271837	0.00133214	1.22327	1.97833	57	105	0.403206	0.781462	0.683211	1.21296
402875	NM_001001501,NM_001001501_dup1,NM_001312898,NM_001312898_dup1,XM_005165704,XM_005165706,XM_009302124	dzip1	DAZ interacting zinc finger protein 1	protein_coding	NP_001001501.2;NP_001299827.1;XP_005165761.1;XP_005165763.1;XP_009300399.1	ZDB-GENE-040526-1	3.47878	2.72251	2.32274e-12	4.3542e-11	3.4776	1.96804	433	104	2.03181	0.490879	2.15341	0.494311
402879	XM_005171125,XM_005171126,XM_005171127,XM_017351300	LOC402879	mitochondrial ubiquitin ligase activator of nfkb 1-A, transcript variant X2	protein_coding	XP_005171182.1;XP_005171183.1;XP_005171184.1;XP_017206789.1	.	2.18798	2.47477	1.0414e-05	7.25294e-05	3.09426	2.152	322	123	1.7338	0.692682	2.93784	1.07516
402884	NM_001199335,NM_001199335_dup1	tlr21	toll-like receptor 21	protein_coding	NP_001186264.1	ZDB-GENE-040220-4	2.19219	-0.855825	0.0383018	0.089931	0.747673	0.387406	29	11	0.135599	0.052806	0.027191	0.017792
402895	NM_205603,NM_205603_dup1	zgc:100846	zgc:100846	protein_coding	NP_991166.1	ZDB-GENE-040801-47	2.30301	1.87815	1.43227e-05	9.67091e-05	2.59325	1.67097	215	78	1.95512	0.738373	3.31284	1.14608
402908	NM_001197300,NM_205615	e2f5	E2F transcription factor 5	protein_coding	NP_001184229.1;NP_991178.1	ZDB-GENE-030828-3	2.08686	0.61721	0.00352053	0.0122778	1.58035	0.965043	85	34	0.556075	0.245646	0.94224	0.381286
402914	NM_205619	her12	hairy-related 12	protein_coding	NP_991182.1	ZDB-GENE-040824-5	2.29609	2.26985	5.561e-06	4.13448e-05	2.9311	1.95768	283	103	4.17266	1.58252	7.07035	2.45635
402915	NM_205620,XM_021478222,XM_021478223,XM_021478224	sult1st4	sulfotransferase family 1, cytosolic sulfotransferase 4	protein_coding	NP_991183.1;XP_021333897.1;XP_021333898.1;XP_021333899.1	ZDB-GENE-040426-2054	2.20905	-0.0556404	0.00722371	0.0226601	1.1642	0.641612	53	20	0.571358	0.241385	0.968136	0.374671
402939	NM_205642,XM_005157313	zgc:77938	zgc:77938	protein_coding	NP_991205.1;XP_005157370.1	ZDB-GENE-040426-1910	2.55638	5.47059	2.60102e-10	3.85805e-09	6.0145	4.69461	2718	889	23.4257	7.9756	39.6937	12.3795
402940	NM_205643	pnp4b	purine nucleoside phosphorylase 4b	protein_coding	NP_991206.1	ZDB-GENE-040426-1887	-23.2814	3.77528	1.76516e-57	2.50855e-55	1.08678	4.76762	48	937	0.606272	12.3524	1.0273	19.173
402941	NM_205644	insm1a	insulinoma-associated 1a	protein_coding	NP_991207.1	ZDB-GENE-040426-1810	3.20558	3.52372	1.37909e-12	2.64254e-11	4.20336	2.68542	744	194	4.73956	1.28215	8.03093	1.99012
402945	NM_205648	dhrs13l1	dehydrogenase/reductase (SDR family) member 13 like 1	protein_coding	NP_991211.1	ZDB-GENE-040426-1907	2.28389	4.71586	4.97082e-08	5.32068e-07	5.22727	4.08424	1557	570	15.8252	6.02739	26.815	9.35556
402979	NM_205679	cda	cytidine deaminase	protein_coding	NP_991242.1	ZDB-GENE-040426-1911	-5.73049	0.459597	6.65276e-10	9.34095e-09	0.48345	1.72085	17	82	0.193564	1.00765	0.327984	1.56405
402985	NM_205685,NM_205685_dup1,XM_005168340	grhprb	glyoxylate reductase/hydroxypyruvate reductase b	protein_coding	NP_991248.2;XP_005168397.1	ZDB-GENE-040426-1847	-9.65939	2.7049	1.48153e-30	8.80255e-29	1.14904	3.67689	52	421	0.442182	3.73658	0.641002	4.34127
402986	NM_205686	cry-dash	cryptochrome DASH	protein_coding	NP_991249.1	ZDB-GENE-040617-2	3.28479	4.09228	6.19756e-14	1.33833e-12	4.75699	3.15785	1112	283	8.9674	2.37249	15.1948	3.68252
402988	NM_205688	dnaaf4	dynein axonemal assembly factor 4	protein_coding	NP_991251.1	ZDB-GENE-040426-1892	3.89501	-0.868141	0.000877812	0.00372388	0.825989	0.258248	33	7	0.358669	0.077161	0.607745	0.119767
402991	NM_205691,NM_205691_dup1	gadd45ga	growth arrest and DNA-damage-inducible, gamma a	protein_coding	NP_991254.1	ZDB-GENE-040426-1882	2.30682	4.35356	5.36396e-08	5.71241e-07	4.87911	3.73569	1214	440	17.0561	6.43552	28.9006	9.98904
402994	NM_205694,XM_021476050	dao.3	D-amino-acid oxidase, tandem duplicate 3	protein_coding	NP_991257.1;XP_021331725.1	ZDB-GENE-040426-1894	-2.08541	-0.384448	0.0233933	0.0601506	0.554179	0.985592	20	35	0.22287	0.400198	0.377641	0.621177
402995	NM_001122698	pus7	pseudouridylate synthase 7 (putative)	protein_coding	NP_001116170.1	ZDB-GENE-060620-1	2.09759	5.13394	6.60214e-07	5.89151e-06	5.59889	4.56236	2027	808	13.1881	5.46957	22.3465	8.48972
402999	NM_205698,XM_021466666	irx4a	iroquois homeobox 4a	protein_coding	NP_991261.1;XP_021322341.1	ZDB-GENE-040426-1825	2.03794	3.2169	1.31801e-05	8.98306e-05	3.7428	2.82309	529	217	3.95447	1.67675	6.70064	2.6026
403003	NM_001328492,NM_001328493,NM_205702	fgf13b	fibroblast growth factor 13b	protein_coding	NP_001315421.1;NP_001315422.1;NP_991265.1	ZDB-GENE-040426-1793	2.2796	2.83619	1.50901e-06	1.25748e-05	3.43763	2.40941	420	154	2.79747	1.11844	4.74017	1.736
403010	NM_001256191	nr0b2a	nuclear receptor subfamily 0, group B, member 2a	protein_coding	NP_001243120.1	ZDB-GENE-080403-1	-6.92498	-0.353283	9.9317e-08	1.01495e-06	0.247725	1.21174	8	47	0.038827	0.245242	0.065791	0.380658
403016	NM_205712,NM_205712_dup1	rfx4	regulatory factor X, 4	protein_coding	NP_991275.1	ZDB-GENE-040909-2	-2.45628	0.501193	0.000460449	0.00211639	0.844921	1.56572	34	70	0.175629	0.376872	0.297595	0.438775
403024	NM_205715,XM_021469945	slc25a19	solute carrier family 25 (mitochondrial thiamine pyrophosphate carrier), member 19	protein_coding	NP_991278.1;XP_021325620.1	ZDB-GENE-050417-292	2.00705	3.72288	9.9141e-06	6.94152e-05	4.2125	3.2835	749	312	6.71059	2.79436	11.3707	4.33734
403052	NM_205736,XM_005164355,XM_009299178	map2k4a	mitogen-activated protein kinase kinase 4a	protein_coding	NP_991299.2;XP_005164412.1;XP_009297453.1	ZDB-GENE-060512-98	-2.1511	1.96792	4.2632e-05	0.000257666	1.79025	2.65367	105	189	1.21651	2.33602	2.06131	3.62591
403061	NM_001139464,NM_001139464_dup1	ela2	elastase 2	protein_coding	NP_001132936.1	ZDB-GENE-041117-1	-17.1528	3.41479	1.37179e-47	1.47209e-45	1.11825	4.40153	50	719	0.869011	13.014	1.45077	20.2
403131	NM_001131051,NM_001131051_dup1,XM_009307228	tlr4ba	toll-like receptor 4b, duplicate a	protein_coding	NP_001124523.1	ZDB-GENE-040219-8	2.72994	0.0101553	0.000811266	0.00348303	1.25192	0.588867	59	18	0.352489	0.122508	0.597274	0.181424
403136	XM_017358120	tlr8b	toll-like receptor 8b	protein_coding	XP_017213609.1	ZDB-GENE-040219-12	-2.70038	-1.51683	0.0452806	0.102573	0.218988	0.534119	7	16	0.028885	0.075146	0.048944	0.11664
403137	XM_001920559	tlr8a	toll-like receptor 8a	protein_coding	XP_001920594.5	ZDB-GENE-040219-13	2.9189	0.684202	1.8117e-05	0.000118894	1.7202	0.835197	98	28	0.403597	0.118703	0.683873	0.184247
404210	NM_212821	crim1	cysteine rich transmembrane BMP regulator 1 (chordin-like)	protein_coding	NP_997986.1	ZDB-GENE-040312-2	-3.76394	0.516697	4.27364e-07	3.94416e-06	0.664862	1.6836	25	79	0.121016	0.403482	0.205055	0.626274
404211	NM_212822,NM_212822_dup1,XM_005163369,XM_005163370	pik3r2	phosphoinositide-3-kinase, regulatory subunit 2 (beta)	protein_coding	NP_997987.2;XP_005163426.1;XP_005163427.1	ZDB-GENE-040309-1	-2.23409	2.31027	8.23609e-06	5.89618e-05	2.01584	2.96438	130	243	0.588856	1.10642	0.380207	0.810024
404231	NM_212823,XM_021480999	fgf2	fibroblast growth factor 2	protein_coding	NP_997988.1;XP_021336674.1	ZDB-GENE-040318-1	2.37535	0.0144658	0.00266326	0.00965202	1.22327	0.641612	57	20	0.948756	0.340583	1.60762	0.528644
404604	NM_001328259,NM_207072,XM_005159729,XM_009294384,XM_009294385,XM_009294386,XM_009294387,XM_009294388,XM_009294389,XM_009294390,XM_009294391,XM_009294392,XM_009294393,XM_009294394,XM_009294395,XM_009294396,XM_009294397,XM_009294398,XM_009294399,XM_009294400,XM_009294401,XM_009294402,XM_009294403,XM_009294404,XM_009294405,XM_009294406,XM_009294407,XM_009294408,XM_009294409,XM_009294410,XM_009294411…	clasp2	cytoplasmic linker associated protein 2	protein_coding	NP_001315188.1;NP_996955.1;XP_005159786.1;XP_009292659.1;XP_009292660.1;XP_009292661.1;XP_009292662.1;XP_009292663.1;XP_009292664.1;XP_009292665.1;XP_009292666.1;XP_009292667.1;XP_009292668.1;XP_009292669.1;XP_009292670.1;XP_009292671.1;XP_009292672.1;XP_009292673.1;XP_009292674.1;XP_009292675.1;XP_009292676.1;XP_009292677.1;XP_009292678.1;XP_009292679.1;XP_009292680.1;XP_009292681.1;XP_009292682…	ZDB-GENE-040426-2343	2.07213	8.89479	3.86081e-07	3.59153e-06	9.32871	8.27999	27417	11064	74.3564	30.223	125.993	46.9114
404608	NM_207076,XM_021476052,XR_661750	rad51d	RAD51 paralog D	protein_coding	NP_996959.2;XP_021331727.1	ZDB-GENE-040426-2490	-2.47292	0.186812	0.000847044	0.00361303	0.706862	1.36076	27	56	0.281433	0.761761	0.476873	1.18239
404612	NM_207080,XM_021479526	ralbp1	ralA binding protein 1	protein_coding	NP_996963.1;XP_021335201.1	ZDB-GENE-040426-2098	-2.43465	2.11742	1.63572e-06	1.35024e-05	1.80965	2.82879	107	218	0.739982	1.3241	1.25386	2.05523
404613	NM_001320407,XM_005162160,XM_021469772	klhl21	kelch-like family member 21	protein_coding	NP_001307336.1;XP_005162217.1;XP_021325447.1	ZDB-GENE-040426-2627	2.35227	4.06065	4.32108e-08	4.65124e-07	4.60425	3.44801	996	354	3.9213	1.44315	6.64444	2.24003
404630	NM_207098	zc3h10	zinc finger CCCH-type containing 10	protein_coding	NP_996981.1	ZDB-GENE-040426-2359	2.64111	4.17147	4.87091e-10	6.97887e-09	4.75699	3.44059	1112	352	7.90915	2.605	13.4016	4.04342
404725	NM_212825,NM_212825_dup1	cx30.3	connexin 30.3	protein_coding	NP_997990.2	ZDB-GENE-040406-1	-2.50282	1.11794	3.5501e-05	0.000218013	1.14904	2.01877	52	109	0.354085	0.781714	0.599979	1.21335
404727	NM_001130636,XM_005158501	cx34.4	connexin 34.4	protein_coding	NP_001124108.1;XP_005158558.1	ZDB-GENE-040406-3	-2.59561	4.04758	9.86941e-10	1.35853e-08	3.34757	4.63407	392	851	1.665	3.77143	2.82126	5.85391
404729	NM_001007213,XM_005167687,XM_021478635	gja5a	gap junction protein, alpha 5a	protein_coding	NP_001007214.1;XP_005167744.1;XP_021334310.1	ZDB-GENE-040407-3	3.87592	0.718622	1.23921e-07	1.25008e-06	1.80965	0.717283	107	23	0.918876	0.30132	1.55699	0.4677
405399	NM_001009885,NM_001009885_dup1	mnx1	motor neuron and pancreas homeobox 1	protein_coding	NP_001009885.1	ZDB-GENE-040409-1	-5.52638	-1.50523	0.000910749	0.00383576	0.129173	0.615481	4	19	0.035076	0.200994	0.059435	0.311977
405766	NM_212840,XM_005160144,XM_005160145,XM_005160146	b3gnt2a	UDP-GlcNAc:betaGal beta-1,3-N-acetylglucosaminyltransferase 2a	protein_coding	NP_998005.1;XP_005160201.1;XP_005160202.1;XP_005160203.1	ZDB-GENE-090312-192	-2.78728	1.80483	1.42421e-07	1.41634e-06	1.49902	2.60802	78	182	0.46097	1.26396	0.78109	1.96188
405770	NM_212844	il1b	interleukin 1, beta	protein_coding	NP_998009.2	ZDB-GENE-040702-2	6.45013	2.12635	2.97802e-19	9.80231e-18	3.07435	1.10309	317	41	2.86155	0.377448	4.84875	0.585865
405771	NM_212845,XM_009294595	rhag	Rh-associated glycoprotein	protein_coding	NP_998010.1;XP_009292870.1	ZDB-GENE-030131-8229	2.61222	2.16089	2.5947e-07	2.48631e-06	2.88153	1.78086	272	87	2.45015	0.801551	4.15164	1.24414
405772	NM_212846,NM_212846_dup1	hbbe2	hemoglobin beta embryonic-2	protein_coding	NP_998011.1	ZDB-GENE-040702-1	3.53019	0.490537	3.40609e-06	2.6632e-05	1.62484	0.667279	89	21	2.5625	0.617433	4.34202	0.958363
405776	NM_212850,XM_017354068	glcea	glucuronic acid epimerase a	protein_coding	NP_998015.2;XP_017209557.1	ZDB-GENE-040630-9	3.18021	3.2301	6.56592e-12	1.17533e-10	3.92287	2.44694	605	159	3.8639	1.02417	6.54717	1.58969
405783	NM_212857,NM_212857_dup1	ostf1	osteoclast stimulating factor 1	protein_coding	NP_998022.1	ZDB-GENE-040625-157	-2.1986	2.66192	4.95348e-06	3.72094e-05	2.30276	3.27099	168	309	2.09393	4.01658	3.54806	6.23442
405791	NM_214726	cacna1sb	calcium channel, voltage-dependent, L type, alpha 1S subunit, b	protein_coding	NP_999891.1	ZDB-GENE-051227-1	2.48253	3.68889	1.24042e-08	1.46489e-07	4.26966	3.06436	781	263	2.05842	0.720818	3.48789	1.11883
405798	NM_214730,XM_005172174,XM_005172175	asb7	ankyrin repeat and SOCS box containing 7	protein_coding	NP_999895.1;XP_005172231.1;XP_005172232.1	ZDB-GENE-040426-2429	-4.43612	0.521847	1.53339e-08	1.77695e-07	0.599476	1.72085	22	82	0.218698	0.843484	0.370573	1.30923
405801	NM_212865,XR_002456099,XR_222595	rbm24a	RNA binding motif protein 24a	protein_coding	NP_998030.1	ZDB-GENE-040628-1	-113.185	2.78084	5.12988e-62	8.70135e-60	0.159737	3.86886	5	486	0.10113	10.9327	0.17136	16.9694
405825	NM_001328345,NM_212889	mfap4	microfibrillar-associated protein 4	protein_coding	NP_001315274.1;NP_998054.2	ZDB-GENE-040426-2246	3.09982	1.79131	1.8652e-08	2.12403e-07	2.61547	1.4072	219	59	3.47224	0.881786	5.88352	1.36868
405833	NM_001098198,NM_212897	clic5b	chloride intracellular channel 5b	protein_coding	NP_001091668.1;NP_998062.1	ZDB-GENE-040426-2542	-117.596	6.79801	1.46352e-129	1.81072e-126	1.52272	7.79226	80	7880	0.930407	95.6229	1.57653	148.423
405838	NM_212902,NM_212902_dup1	slc13a3	solute carrier family 13 (sodium-dependent dicarboxylate transporter), member 3	protein_coding	NP_998067.1	ZDB-GENE-040426-2486	-2.94912	0.766891	7.13852e-06	5.17918e-05	0.882056	1.80419	36	89	0.157552	0.411231	0.266964	0.638302
405843	NM_212907	foxq1b	forkhead box Q1b	protein_coding	NP_998072.1	ZDB-GENE-040426-2090	-4.21662	5.41689	4.26673e-21	1.62576e-19	4.11838	6.12988	699	2465	7.43413	27.3044	12.5967	42.3811
405844	NM_212908,XM_017356458,XM_021476821,XM_021476822,XM_021476823	tox2	TOX high mobility group box family member 2	protein_coding	NP_998073.1;XP_017211947.1;XP_021332496.1;XP_021332497.1;XP_021332498.1	ZDB-GENE-040426-2095	-2.16	2.38333	1.5213e-05	0.000102098	2.09705	3.01523	140	253	0.839754	1.58633	1.42292	2.46226
405847	NM_212911,NM_212911_dup1	sapcd2	suppressor APC domain containing 2	protein_coding	NP_998076.1	ZDB-GENE-050128-1	-11.3976	5.92372	7.31093e-51	8.61989e-49	3.43138	6.81499	418	3985	7.3759	73.2848	1.40269	1.88876
405857	NM_212921	msrb2	methionine sulfoxide reductase B2	protein_coding	NP_998086.2	ZDB-GENE-040426-2304	-2.79809	-0.105014	0.000674911	0.00296603	0.554179	1.21174	20	47	0.104501	0.25577	0.177071	0.396999
405859	NM_212923,NM_212923_dup1	arih1l	ariadne homolog, ubiquitin-conjugating enzyme E2 binding protein, 1 like	protein_coding	NP_998088.1	ZDB-GENE-040426-2395	-2.21013	2.25495	1.05285e-05	7.32292e-05	1.98203	2.91166	126	233	1.0819	2.09541	1.82611	3.14186
405875	NM_212939,XM_021481369,XM_021481370,XM_021481371,XR_002459979	zgc:85932	zgc:85932	protein_coding	NP_998104.1;XP_021337044.1;XP_021337045.1;XP_021337046.1	ZDB-GENE-040426-2460	5.43024	0.688469	5.48727e-10	7.80349e-09	1.8477	0.561752	111	17	0.693936	0.105437	1.17584	0.163656
405877	NM_212941,XM_005169422,XM_009306341	mafgb	v-maf avian musculoaponeurotic fibrosarcoma oncogene homolog Gb	protein_coding	NP_998106.1;XP_005169479.1;XP_009304616.1	ZDB-GENE-040426-2403	-5.45514	-0.630473	9.45135e-06	6.66858e-05	0.247725	1.02583	8	37	0.037766	0.196256	0.063993	0.304623
405887	NM_212951	nf2b	neurofibromin 2b (merlin)	protein_coding	NP_998116.1	ZDB-GENE-040622-3	-2.27785	2.17866	6.51952e-06	4.75964e-05	1.90294	2.85695	117	223	0.839573	1.66647	1.42261	2.58665
405902	NM_212966,XM_017357663	nrp2b	neuropilin 2b	protein_coding	NP_998131.1;XP_017213152.1	ZDB-GENE-040611-3	2.91743	4.0181	1.23962e-11	2.13713e-10	4.64533	3.20681	1026	294	3.18911	0.945745	5.40377	1.46796
406261	NM_212988,XM_005159885	pdcd4a	programmed cell death 4a	protein_coding	NP_998153.1;XP_005159942.1	ZDB-GENE-040426-1920	-3.47646	6.63521	3.39602e-17	9.77134e-16	5.50456	7.27943	1896	5512	10.3512	31.0528	17.5396	48.1993
406278	NM_213005,XM_005173544,XM_021466669,XM_021466670	ggctb	gamma-glutamylcyclotransferase b	protein_coding	NP_998170.1;XP_005173601.1;XP_021322344.1;XP_021322345.1	ZDB-GENE-040426-1939	-49.4809	8.50142	1.22031e-109	9.16668e-107	3.94058	9.47456	613	25369	10.7371	421.974	18.1934	654.977
406280	NM_001327825	itih2	inter-alpha-trypsin inhibitor heavy chain 2	protein_coding	NP_001314754.1	ZDB-GENE-040426-1942	-3.23674	2.84302	1.01247e-11	1.76286e-10	2.12829	3.57548	144	390	0.680762	1.92569	1.15352	2.989
406290	NM_213017,XM_009300123	itpk1a	inositol-tetrakisphosphate 1-kinase a	protein_coding	NP_998182.1;XP_009298398.1	ZDB-GENE-040426-1953	-3.12657	2.19374	1.11102e-09	1.52037e-08	1.6786	2.97982	94	246	0.645127	1.76748	1.09313	2.74343
406319	NM_213046,XM_021470031	snn	stannin	protein_coding	NP_998211.1;XP_021325706.1	ZDB-GENE-040426-1987	-2.00814	0.669896	0.00438897	0.0148294	1.02172	1.6193	44	74	0.463271	0.812796	0.784989	1.2616
406322	NM_213049	poc1a	POC1 centriolar protein A	protein_coding	NP_998214.1	ZDB-GENE-040426-1993	-2.13189	-0.433902	0.020365	0.0536254	0.530986	0.965043	19	34	0.219526	0.40943	0.371976	0.635506
406323	NM_213050	chia.1	chitinase, acidic.1	protein_coding	NP_998215.1	ZDB-GENE-040426-1994	-27.1596	6.07274	8.0734e-80	2.2053e-77	2.53032	7.03149	204	4636	1.85777	43.9997	3.14789	68.2952
406327	NM_213054,NM_213054_dup1	fgg	fibrinogen gamma chain	protein_coding	NP_998219.1	ZDB-GENE-040426-1998	-41.2984	3.74897	1.2313e-67	2.27175e-65	0.706862	4.76762	27	937	0.258847	9.56933	0.382596	5.73764
406332	NM_213059	crsp7	cofactor required for Sp1 transcriptional activation, subunit 7	protein_coding	NP_998224.1	ZDB-GENE-040426-2005	-3.08547	3.86051	1.37512e-12	2.64136e-11	3.01707	4.5172	303	782	1.95471	5.25725	3.31216	8.16017
406336	NM_213063,XM_005162879	wdr24	WD repeat domain 24	protein_coding	NP_998228.1;XP_005162936.1	ZDB-GENE-040426-2012	2.21223	3.37421	1.08283e-06	9.26575e-06	3.9251	2.89002	606	229	3.17431	1.23284	5.37871	1.91358
406338	NM_213249	chia.2	chitinase, acidic.2	protein_coding	NP_998414.1	ZDB-GENE-040426-2014	-8.11612	5.14824	1.51189e-38	1.19099e-36	3.13329	6.0027	332	2254	2.93338	20.7828	4.97046	32.2585
406340	NM_213067	dusp1	dual specificity phosphatase 1	protein_coding	NP_998232.1	ZDB-GENE-040426-2018	-2.07436	6.70332	4.76523e-07	4.36719e-06	6.10366	7.14545	2894	5020	19.4679	35.1696	32.9873	54.5893
406363	NM_213090	scinlb	scinderin like b	protein_coding	NP_998255.2	ZDB-GENE-040426-2068	-2.14897	8.51845	1.03662e-07	1.0538e-06	7.86962	8.96997	9945	17871	53.7241	100.528	91.0327	156.037
406377	NM_214733	azi2	5-azacytidine induced 2	protein_coding	NP_999898.1	ZDB-GENE-040426-2097	-3.63669	2.9216	1.06654e-13	2.2568e-12	2.08913	3.68319	139	423	0.746927	2.36363	1.26563	3.66876
406380	NM_001328209,XM_017359226,XM_021481372	zgc:63694	zgc:63694	protein_coding	NP_001315138.1;XP_017214715.1;XP_021337047.1	ZDB-GENE-040426-2105	-7.72571	2.54909	8.88927e-26	4.32796e-24	1.22327	3.5025	57	369	0.32698	2.4195	0.554052	3.75548
406397	NM_213123	mmp9	matrix metallopeptidase 9	protein_coding	NP_998288.1	ZDB-GENE-040426-2132	3.00105	4.43596	1.40971e-12	2.69794e-11	5.06013	3.55844	1382	385	7.71983	2.23843	13.0808	3.47443
406424	NM_213150	slc22a2	solute carrier family 22 (organic cation transporter), member 2	protein_coding	NP_998315.1	ZDB-GENE-040426-2167	2.98188	2.5265	1.36201e-09	1.85059e-08	3.25152	1.94724	364	102	1.99247	0.577349	3.37614	0.896145
406465	NM_214738,XM_009291487,XM_021481373	slc37a4a	solute carrier family 37 (glucose-6-phosphate transporter), member 4a	protein_coding	NP_999903.1;XP_009289762.1;XP_021337048.1	ZDB-GENE-040426-2230	-2.48269	2.08272	9.77857e-07	8.44999e-06	1.77058	2.80586	103	214	1.1006	1.7507	1.8649	2.71739
406467	NM_213186,XM_021468041,XM_021468042	abcf1	ATP-binding cassette, sub-family F (GCN20), member 1	protein_coding	NP_998351.1;XP_021323716.1;XP_021323717.1	ZDB-GENE-050517-31	-3.04439	7.38859	2.62651e-14	5.86448e-13	6.38971	7.9843	3538	9007	16.3031	43.225	27.6247	67.0927
406473	NM_213192,NM_213192_dup1	pck2	phosphoenolpyruvate carboxykinase 2 (mitochondrial)	protein_coding	NP_998357.1	ZDB-GENE-040426-2266	-4.18744	2.44254	1.05473e-14	2.47591e-13	1.62484	3.2835	89	312	0.447742	1.64764	0.6257	0.672422
406496	NM_213215	aldoab	aldolase a, fructose-bisphosphate, b	protein_coding	NP_998380.1	ZDB-GENE-040426-2299	2.81253	4.30157	2.88404e-11	4.76886e-10	4.9064	3.49893	1238	368	13.9758	4.32073	23.6813	6.70652
406507	NM_213226	gadd45gb.1	growth arrest and DNA-damage-inducible, gamma b, tandem duplicate 1	protein_coding	NP_998391.1	ZDB-GENE-040426-2321	2.50453	1.09067	5.15672e-05	0.000304838	1.98203	1.12178	126	42	1.50293	0.510516	2.54663	0.792409
406522	NM_213239,XM_005155689,XM_017358215,XM_021479586,XM_021479587,XM_021479588	nr2f6b	nuclear receptor subfamily 2, group F, member 6b	protein_coding	NP_998404.1;XP_005155746.1;XP_017213704.1;XP_021335261.1;XP_021335262.1;XP_021335263.1	ZDB-GENE-040426-2351	2.54031	6.08293	2.2396e-10	3.3527e-09	6.61734	5.29473	4150	1366	26.3982	8.93199	44.7303	13.864
406537	NM_213452	slc13a2	solute carrier family 13 (sodium-dependent dicarboxylate transporter), member 2	protein_coding	NP_998617.2	ZDB-GENE-040426-2389	-10.4569	2.88918	1.15201e-33	7.64357e-32	1.19403	3.85776	55	482	0.333173	3.09017	0.564545	4.79647
406539	NM_213011	amy2a	amylase, alpha 2A (pancreatic)	protein_coding	NP_998176.2	ZDB-GENE-040426-2393	-14.5583	4.02204	2.83002e-49	3.13283e-47	1.62484	4.97195	89	1085	0.85472	10.8897	1.44828	16.9027
406540	NM_213256,NM_213256_dup1,XM_009299771	ttyh2l	tweety homolog 2, like	protein_coding	NP_998421.1	ZDB-GENE-040426-2394	2.00616	4.70022	3.84176e-06	2.95876e-05	5.1542	4.18984	1478	616	8.32549	3.62641	14.1071	5.62882
406548	NM_213264,NM_213264_dup1	col9a1b	collagen, type IX, alpha 1b	protein_coding	NP_998429.2	ZDB-GENE-040426-2410	2.78154	2.80942	3.9714e-09	5.04411e-08	3.48667	2.22295	436	131	2.4109	0.752517	3.04444	1.16804
406557	NM_213273	mcrs1	microspherule protein 1	protein_coding	NP_998438.1	ZDB-GENE-040426-2434	2.17804	5.40253	1.41489e-07	1.40839e-06	5.87985	4.78531	2472	949	17.2505	6.8913	29.23	10.6965
406560	NM_213275	vgll4b	vestigial-like family member 4b	protein_coding	NP_998440.1	ZDB-GENE-040426-2445	-3.07763	2.14594	1.93243e-09	2.56758e-08	1.65733	2.93298	92	237	1.50476	4.0416	2.54975	6.27327
406584	NM_213295,XM_009293129,XM_009293130	abraxas2b	abraxas 2b, BRISC complex subunit	protein_coding	NP_998460.1;XP_009291404.1;XP_009291405.1	ZDB-GENE-040426-2491	-2.26148	2.41815	4.26589e-06	3.24032e-05	2.08913	3.06436	139	263	0.920326	1.84493	1.55944	2.86365
406596	NM_213304	socs3b	suppressor of cytokine signaling 3b	protein_coding	NP_998469.1	ZDB-GENE-040426-2528	2.05801	6.01525	7.79574e-07	6.87208e-06	6.45893	5.43488	3714	1509	28.0705	11.8724	47.5639	18.4281
406601	NM_213309,XM_021478235	stap2b	signal transducing adaptor family member 2b	protein_coding	NP_998474.1;XP_021333910.1	ZDB-GENE-040426-2540	-6.77721	0.891429	9.64561e-14	2.04925e-12	0.554179	2.06778	20	114	0.073175	0.751235	0.123991	1.16605
406633	NM_213328	tesca	tescalcin a	protein_coding	NP_998493.1	ZDB-GENE-040426-2632	-2.32037	3.20937	2.75174e-07	2.62245e-06	2.71144	3.79511	237	460	1.65199	3.34238	2.79921	5.18795
406640	NM_214763	tmem47	transmembrane protein 47	protein_coding	NP_999928.1	ZDB-GENE-040426-2644	-2.46839	5.17211	1.53047e-09	2.06613e-08	4.44431	5.70804	887	1831	2.63922	5.67412	4.47202	8.80722
406651	NM_213342	ddc	dopa decarboxylase	protein_coding	NP_998507.1	ZDB-GENE-040426-2656	4.68711	2.93533	6.48146e-18	1.96433e-16	3.75286	1.87198	533	95	2.00501	0.369757	3.39739	0.573926
406710	NM_213401,XM_009294703	stmn4	stathmin-like 4	protein_coding	NP_998566.1;XP_009292978.1	ZDB-GENE-040426-2732	2.07993	6.13937	5.17252e-07	4.71785e-06	6.58674	5.54627	4062	1633	33.2661	13.792	56.3676	21.4076
406739	NM_213430,XM_005156519	pla2g12b	phospholipase A2, group XIIB	protein_coding	NP_998595.2;XP_005156576.1	ZDB-GENE-040426-2771	-7.18541	1.75926	2.69963e-19	8.91385e-18	0.863608	2.78843	35	211	0.293119	1.89972	0.496675	2.9487
406744	NM_213435,XM_005158875,XM_021467138	gskip	gsk3b interacting protein	protein_coding	NP_998600.1;XP_005158932.1;XP_021322813.1	ZDB-GENE-040426-2777	-2.25134	6.25908	2.65336e-08	2.95593e-07	5.58769	6.74176	2011	3786	16.2609	31.7312	27.5533	49.2524
406763	NM_213454	tmem117	transmembrane protein 117	protein_coding	NP_998619.1	ZDB-GENE-040426-2809	-2.21502	0.131632	0.00433438	0.0146662	0.727412	1.29642	28	52	0.251744	0.497946	0.426567	0.772898
406777	NM_213468	aqp3a	aquaporin 3a	protein_coding	NP_998633.1	ZDB-GENE-040426-2826	-2.33686	8.081	4.09343e-09	5.19283e-08	7.35118	8.57071	6930	13542	59.4264	120.934	100.695	187.711
406778	NM_213469,NM_213469_dup1	exo1	exonuclease 1	protein_coding	NP_998634.1	ZDB-GENE-040426-2828	-5.13524	-0.151117	3.62217e-07	3.39203e-06	0.35727	1.29642	12	52	0.069007	0.308483	0.079542	0.199477
406782	NM_213473,NM_213473_dup1,XM_005167152	mapk4	mitogen-activated protein kinase 4	protein_coding	NP_998638.1	ZDB-GENE-040426-2835	-3.85759	0.976868	9.30501e-09	1.12156e-07	0.844921	2.02871	34	110	0.217334	0.494054	0.32388	0.72275
406794	NM_214767	ube2j1	ubiquitin-conjugating enzyme E2, J1	protein_coding	NP_999932.1	ZDB-GENE-040426-2853	-2.83258	3.69058	7.69096e-11	1.21536e-09	2.94871	4.32499	287	680	1.53259	3.78969	2.5969	5.88225
406823	NM_213502	eif3jb	eukaryotic translation initiation factor 3, subunit Jb	protein_coding	NP_998667.1	ZDB-GENE-040426-2900	-3.93924	5.60135	1.38175e-19	4.69505e-18	4.36783	6.29282	839	2764	7.37227	25.309	12.4919	39.2839
406830	NM_001309531	zgc:55413	zgc:55413	protein_coding	NP_001296460.1	ZDB-GENE-040426-2909	-29.4846	2.91681	2.49798e-51	2.98522e-49	0.577005	3.96254	21	521	0.266225	7.01067	0.451105	10.8818
406831	NM_213510	gyg1a	glycogenin 1a	protein_coding	NP_998675.1	ZDB-GENE-040426-2910	-2.73674	6.45394	6.45267e-12	1.15703e-10	5.58206	7.01534	2003	4584	12.07	28.7634	20.452	44.6457
406860	NM_213539,NM_213539_dup1,XM_005169283	ipo9	importin 9	protein_coding	NP_998704.1;XP_005169340.1	ZDB-GENE-040426-2953	-2.10848	4.2561	1.1254e-06	9.57548e-06	3.73013	4.74821	524	924	2.16027	3.28408	3.66046	4.64677
407079	NM_001003727,XM_005156491	klhl31	kelch-like family member 31	protein_coding	NP_001003727.1;XP_005156548.1	ZDB-GENE-030131-2052	2.21475	1.09564	0.00038332	0.00180205	1.94742	1.19419	122	46	0.409302	0.158228	0.693541	0.245597
407619	XM_021470060,XM_021470061	psip1b	PC4 and SFRS1 interacting protein 1b, transcript variant X1	protein_coding	XP_021325735.1;XP_021325736.1	ZDB-GENE-030131-3273	2.72037	4.3498	1.02902e-10	1.60202e-09	4.94091	3.57548	1269	390	3.44923	1.09483	5.84453	1.69937
407641	NM_001163994	si:dkey-37o8.1	si:dkey-37o8.1	protein_coding	NP_001157466.1	ZDB-GENE-030131-5667	-5.24647	1.9659	2.7288e-16	7.3215e-15	1.1642	2.91166	53	233	0.481292	2.19758	0.815523	3.41103
407643	XM_009291585,XM_021466355,XM_021466356,XM_021466357	LOC407643	alpha-2-macroglobulin-like protein 1, transcript variant X1	protein_coding	XP_009289860.1;XP_021322030.1;XP_021322031.1;XP_021322032.1	.	-3.94809	3.92125	1.6878e-17	4.97193e-16	2.8302	4.65186	261	862	0.852711	2.93534	1.44487	4.55616
407656	NM_001198761,NM_001198761_dup1,XM_021467139	shtn1	shootin 1	protein_coding	NP_001185690.1	ZDB-GENE-121127-1	-2.1992	1.83148	4.07935e-05	0.000247765	1.6786	2.54711	94	173	0.846713	1.5943	0.838651	1.82556
407658	NM_214784	acta1b	actin, alpha 1b, skeletal muscle	protein_coding	NP_999949.2	ZDB-GENE-030131-55	5.41009	5.67183	1.04551e-27	5.50166e-26	6.44154	4.07708	3669	567	37.7551	6.06553	63.974	9.41475
407659	NM_214785,XM_005163338,XM_005163339,XM_005163340,XM_009298452,XM_021479658,XM_021479659	st3gal3b	ST3 beta-galactoside alpha-2,3-sialyltransferase 3b	protein_coding	NP_999950.1;XP_005163395.1;XP_005163396.1;XP_005163397.1;XP_009296727.1;XP_021335333.1;XP_021335334.1	ZDB-GENE-050411-13	2.03266	3.44566	1.04921e-05	7.30002e-05	3.9559	3.02519	620	255	3.73325	1.65003	6.32579	2.56114
407660	XR_082582	si:ch1073-322p19.1	si:ch1073-322p19.1	lncRNA	.	ZDB-GENE-091204-224	-2.9574	4.84363	9.8728e-13	1.9174e-11	3.95372	5.45528	619	1531	4.54069	11.7024	7.69395	18.1642
407678	XM_002661221	si:dkey-43p13.5	si:dkey-43p13.5	protein_coding	XP_002661267.2	ZDB-GENE-131121-510	-2.16951	0.340051	0.00358445	0.012478	0.825989	1.42235	33	60	0.41417	0.773306	0.70179	1.2003
407685	XM_005164095,XM_017354802,XM_021474550,XM_691769	itga3a	integrin, alpha 3a, transcript variant X3	protein_coding	XP_005164152.1;XP_017210291.1;XP_021330225.1;XP_696861.6	ZDB-GENE-090805-3	-2.17544	2.4891	9.48932e-06	6.68415e-05	2.17393	3.11186	150	273	0.594113	1.12667	1.00669	1.74879
407693	NM_001324539	esrrb	estrogen-related receptor beta	protein_coding	NP_001311468.1	ZDB-GENE-040616-2	-2.067	0.931811	0.00133355	0.00534562	1.14904	1.81571	52	90	0.329863	0.596025	0.558935	0.925134
407696	NM_001044315	ddx52	DEAD (Asp-Glu-Ala-Asp) box polypeptide 52	protein_coding	NP_001037780.2	ZDB-GENE-060623-1	-2.16709	3.71031	9.92474e-07	8.56574e-06	3.20831	4.23774	352	638	2.78718	5.26041	4.72272	8.16507
407718	NM_214797,NM_214797_dup1	zbtb1	zinc finger and BTB domain containing 1	protein_coding	NP_999962.1	ZDB-GENE-041001-126	-2.62397	1.50427	2.37447e-06	1.90692e-05	1.34795	2.33929	66	145	0.342843	0.78174	0.576472	1.09759
407729	NM_001013273	caprin2	caprin family member 2	protein_coding	NP_001013291.1	ZDB-GENE-040812-2	-7.92395	3.15537	9.77808e-30	5.5446e-28	1.58035	4.06988	85	564	0.359887	2.50868	0.60981	3.89391
407735	NM_214806,XM_017359227,XM_017359228,XM_017359229,XM_021481376,XR_002459980	gria4a	glutamate receptor, ionotropic, AMPA 4a	protein_coding	NP_999971.1;XP_017214716.1;XP_017214717.1;XP_017214718.1;XP_021337051.1	ZDB-GENE-020125-7	2.02422	6.68245	1.13896e-06	9.67521e-06	7.11279	6.10603	5868	2424	23.0277	9.85428	39.0192	15.2956
407983	NM_214814,NM_214814_dup1,XM_005156475,XM_005156476	tp53bp2a	tumor protein p53 binding protein, 2a	protein_coding	NP_999979.1	ZDB-GENE-040516-8	-2.4566	4.74339	2.85982e-09	3.70614e-08	4.0425	5.28647	661	1358	2.10207	4.49422	2.84113	1.69338
407987	NM_214818,XM_005171284,XM_009298637,XM_021479667	arhgef18a	rho/rac guanine nucleotide exchange factor (GEF) 18a	protein_coding	NP_999983.1;XP_005171341.1;XP_009296912.1;XP_021335342.1	ZDB-GENE-040516-14	2.29242	4.58475	4.90054e-08	5.25079e-07	5.10106	3.95734	1423	519	5.29498	1.94782	8.97207	3.02335
408256	NM_001001409	actc1a	actin, alpha, cardiac muscle 1a	protein_coding	NP_001001409.2	ZDB-GENE-040520-4	2.99058	3.05124	1.09255e-10	1.69843e-09	3.73521	2.35517	526	147	6.26549	1.81766	10.6165	2.82132
414846	NM_001007290,NM_001007290_dup1	rnf141	ring finger protein 141	protein_coding	NP_001007291.2	ZDB-GENE-040625-71	-2.22534	4.25314	1.96205e-07	1.90869e-06	3.6783	4.7691	504	938	2.97174	5.76473	4.26908	8.94786
415097	NM_001001837,XM_009291105,XR_002459911,XR_002459912,XR_225086,XR_658192,XR_658193	zic6	zic family member 6	protein_coding	NP_001001837.1;XP_009289380.1	ZDB-GENE-061207-1	-3.26394	3.52529	4.42337e-13	8.91157e-12	2.67487	4.21616	230	628	1.75025	5.33897	2.96571	8.28701
415105	NM_001001845,XM_005165511,XM_009301753	adgrv1	adhesion G protein-coupled receptor V1	protein_coding	NP_001001845.2;XP_005165568.1;XP_009300028.1	ZDB-GENE-040624-6	2.1256	6.06952	2.46154e-07	2.36625e-06	6.52755	5.45712	3897	1533	3.11669	1.27629	5.28107	1.98102
415108	NM_001001848	popdc3	popeye domain containing 3	protein_coding	NP_001001848.1	ZDB-GENE-040624-10	-3.44425	0.0388179	3.44758e-05	0.000212337	0.530986	1.34494	19	55	0.102272	0.305574	0.173295	0.474303
415138	NM_001002048	akr1b1	aldo-keto reductase family 1, member B1 (aldose reductase)	protein_coding	NP_001002048.1	ZDB-GENE-040625-7	-3.53025	3.76649	5.4116e-15	1.3083e-13	2.80625	4.47058	256	756	3.42601	10.5474	5.80519	16.3713
415139	NM_001002049	cryba2a	crystallin, beta A2a	protein_coding	NP_001002049.1	ZDB-GENE-040625-8	-30.8076	10.9201	2.80811e-93	1.1144e-90	6.9406	11.8744	5203	134040	77.0378	2066.75	130.537	3207.96
415161	NM_001002071,XM_021479673,XM_021479674,XM_021479677	sirt6	sirtuin 6	protein_coding	NP_001002071.1;XP_021335348.1;XP_021335349.1;XP_021335352.1	ZDB-GENE-031007-2	2.24488	3.40741	6.13333e-07	5.52236e-06	3.96242	2.90628	623	232	6.85313	2.59612	11.6123	4.02962
415164	XM_009297927,XM_021473834	zgc:86725	zgc:86725	protein_coding	XP_021329509.1	ZDB-GENE-040625-46	3.71461	2.17042	1.1036e-11	1.91203e-10	2.99606	1.52418	298	67	3.34888	0.767692	5.6745	1.19159
415166	NM_001002076	fabp6	fatty acid binding protein 6, ileal (gastrotropin)	protein_coding	NP_001002076.1	ZDB-GENE-040625-49	-17.8759	5.77733	5.14401e-65	8.94165e-63	2.76709	6.71239	248	3709	7.25735	113.276	12.2972	175.824
415175	NM_001002085	tnnc1b	troponin C type 1b (slow)	protein_coding	NP_001002085.1	ZDB-GENE-040625-62	4.02737	2.38385	1.18405e-13	2.4929e-12	3.20831	1.60609	352	73	6.99261	1.49088	11.8486	2.31411
415180	NM_001002090,NM_001002090_dup1,XM_005156237,XM_005156238,XM_005156239,XM_005156240	cbx1b	chromobox homolog 1b (HP1 beta homolog Drosophila)	protein_coding	NP_001002090.1	ZDB-GENE-040625-68	2.47814	3.77696	1.13469e-08	1.34789e-07	4.35303	3.14421	830	280	8.80762	3.36931	12.942	4.75121
415182	NM_001002092,XM_009297112,XM_017353539	cyp2aa4	cytochrome P450, family 2, subfamily AA, polypeptide 4	protein_coding	NP_001002092.1;XP_009295387.1;XP_017209028.1	ZDB-GENE-040625-72	-2.61256	1.45604	3.90999e-06	3.00142e-05	1.32116	2.29881	64	140	0.534785	1.51812	0.906164	2.35638
415201	NM_001002111,XM_005156496	mea1	male-enhanced antigen 1	protein_coding	NP_001002111.1;XP_005156553.1	ZDB-GENE-070424-117	2.11013	4.26851	1.20299e-06	1.01944e-05	4.75824	3.73872	1113	441	8.83698	3.64707	14.9738	5.66089
415207	NM_001002117	rbks	ribokinase	protein_coding	NP_001002117.1	ZDB-GENE-040625-112	-2.53682	1.76152	1.91361e-06	1.56246e-05	1.53443	2.54018	81	172	1.00117	2.23405	1.69644	3.46763
415210	NM_001002120	efcab7	EF-hand calcium binding domain 7	protein_coding	NP_001002120.1	ZDB-GENE-040625-115	2.1435	3.82757	1.2107e-06	1.02556e-05	4.34141	3.32036	823	321	5.45362	2.21582	9.24087	3.43933
415223	NM_001002133,NM_001002133_dup1,NM_001002133_dup2	trim63a	tripartite motif containing 63a	protein_coding	NP_001002133.1	ZDB-GENE-040625-139	-2.29558	1.32642	7.79691e-05	0.000444665	1.32116	2.152	64	123	0.650601	1.30461	0.911089	0.50568
415228	NM_001002138,XM_021472162	crygm2d6	crystallin, gamma M2d6	protein_coding	NP_001002138.1	ZDB-GENE-040625-145	7.57339	2.18082	4.45673e-22	1.77872e-20	3.14861	1.02583	336	37	8.13116	0.862037	13.7778	1.33803
415232	NM_001002142	crygm2d18	crystallin, gamma M2d18	protein_coding	NP_001002142.1	ZDB-GENE-040625-154	21.1578	2.91987	2.22947e-44	2.16094e-42	3.93397	0.741649	610	24	15.0211	0.608766	25.4524	0.94491
415234	NM_001002144,XM_005171831,XM_005171832,XM_021476063	med22	mediator complex subunit 22	protein_coding	NP_001002144.1;XP_005171888.1;XP_005171889.1;XP_021331738.1	ZDB-GENE-040625-156	-2.15587	3.17836	2.71966e-06	2.16349e-05	2.7471	3.73569	244	440	2.4968	2.88357	4.23069	4.4758
415235	NM_001002145	cab39	calcium binding protein 39	protein_coding	NP_001002145.1	ZDB-GENE-040625-158	-3.68805	1.29214	2.76821e-09	3.59628e-08	1.02172	2.26558	44	136	0.37881	1.24453	0.641874	1.93173
415240	NM_001002150	cav2	caveolin 2	protein_coding	NP_001002150.1	ZDB-GENE-040625-164	-3.87071	4.64428	3.42036e-18	1.05795e-16	3.49269	5.34728	438	1418	4.01986	13.5496	6.81144	21.0313
415248	NM_001002158,NM_001002158_dup1,XM_005164012	rcn3	reticulocalbin 3, EF-hand calcium binding domain	protein_coding	NP_001002158.1;XP_005164069.1	ZDB-GENE-040625-175	-16.6984	4.41818	1.7438e-55	2.36628e-53	1.77058	5.36895	103	1440	1.03049	15.0726	1.74611	17.1042
431714	NM_001002167,XM_005159349	zgc:91968	zgc:91968	protein_coding	NP_001002167.1;XP_005159406.1	ZDB-GENE-040704-1	2.07591	3.18096	9.15129e-06	6.48296e-05	3.71735	2.77668	519	209	5.15885	2.28299	8.7414	3.5436
431720	NM_001002173,NM_001002173_dup1,XR_001797330	nr4a1	nuclear receptor subfamily 4, group A, member 1	protein_coding	NP_001002173.1	ZDB-GENE-040704-11	-4.17203	2.86722	4.85931e-16	1.28399e-14	1.92979	3.67056	120	419	0.632858	2.27634	1.07234	3.21486
431723	NM_001002176,XM_009306814,XM_021480050	tha1	threonine aldolase 1	protein_coding	NP_001002176.1;XP_009305089.1;XP_021335725.1	ZDB-GENE-040704-14	-2.34232	2.76683	6.39469e-07	5.72582e-06	2.33659	3.39139	173	339	1.71127	3.25722	2.89965	5.05577
431730	NM_001002183,NM_001002183_dup1,XM_005164442,XM_021470182	cdc42ep4a	CDC42 effector protein (Rho GTPase binding) 4a	protein_coding	NP_001002183.1	ZDB-GENE-040704-22	2.16269	2.3551	1.87214e-05	0.00012244	2.9833	2.06778	295	114	1.60536	0.599494	1.77989	0.745652
431733	NM_001002186,NM_001002186_dup1,NM_001002186_dup2	tspan9b	tetraspanin 9b	protein_coding	NP_001002186.1	ZDB-GENE-040704-25	-2.20878	2.08591	1.70191e-05	0.000112744	1.85705	2.76484	112	207	0.930382	1.79571	1.57648	2.25439
431756	NM_001002209,XM_005171726	rabepk	Rab9 effector protein with kelch motifs	protein_coding	NP_001002209.1;XP_005171783.1	ZDB-GENE-040704-52	2.15263	1.03722	0.000672277	0.0029563	1.89388	1.17643	116	45	1.38546	0.607075	2.3476	0.942285
431757	NM_001002210	spag6	sperm associated antigen 6	protein_coding	NP_001002210.1	ZDB-GENE-040704-53	2.7789	0.420714	0.00013074	0.000703109	1.52272	0.741649	80	24	0.708657	0.221771	1.20078	0.344227
431762	NM_001002215,NM_001002215_dup1	mgst1.2	microsomal glutathione S-transferase 1.2	protein_coding	NP_001002215.2	ZDB-GENE-040704-59	-2.0168	3.62407	8.98323e-06	6.37464e-05	3.19361	4.12417	348	587	2.50697	4.40533	4.24793	6.83783
431763	NM_001002216,NM_001002216_dup1	gadd45ab	growth arrest and DNA-damage-inducible, alpha, b	protein_coding	NP_001002216.1	ZDB-GENE-040704-60	2.11829	2.95467	8.37427e-06	5.97882e-05	3.5165	2.5677	446	176	5.78192	2.37555	9.79715	3.68726
431776	NM_001002229,XM_005162844	snx7	sorting nexin 7	protein_coding	NP_001002229.2;XP_005162901.1	ZDB-GENE-040704-77	-2.39886	4.25525	1.38622e-08	1.62244e-07	3.61077	4.80279	479	961	2.88358	5.36951	4.88608	8.33441
431777	NM_001002230,XM_021479153	tuba7l	tubulin, alpha 7 like	protein_coding	NP_001002230.1;XP_021334828.1	ZDB-GENE-040704-78	4.10142	2.83859	2.81867e-15	6.94205e-14	3.63	1.91547	486	99	3.45765	0.730162	5.8588	1.13334
432384	NM_001002307,NM_001002307_dup1	rbp2b	retinol binding protein 2b, cellular	protein_coding	NP_001002307.1	ZDB-GENE-040715-7	-4.23571	0.756949	8.64655e-09	1.0482e-07	0.706862	1.88297	27	96	0.702766	2.68182	1.1908	4.16266
432385	NM_001002308	spp1	secreted phosphoprotein 1	protein_coding	NP_001002308.1	ZDB-GENE-050706-97	-13.3834	2.0277	4.3079e-30	2.50992e-28	0.643394	3.09777	24	270	0.248348	2.9348	0.420813	4.55532
432387	NM_001002310,XM_009294193,XM_017353790	pkd2	polycystic kidney disease 2	protein_coding	NP_001002310.1;XP_009292468.1;XP_017209279.1	ZDB-GENE-040827-4	-3.89887	1.25411	7.86789e-10	1.09884e-08	0.970915	2.24868	41	134	0.164535	0.641901	0.278796	0.996342
432388	NM_001002311,NM_001002311_dup1,XM_005171374	lrrc6	leucine rich repeat containing 6	protein_coding	NP_001002311.1	ZDB-GENE-040827-2	3.45198	-0.184268	0.000159262	0.000832814	1.17919	0.447893	54	13	0.476239	0.097952	0.772854	0.152039
432389	NM_001002312	ift172	intraflagellar transport 172	protein_coding	NP_001002312.1	ZDB-GENE-040827-1	2.68098	5.38441	4.36081e-11	7.0827e-10	5.9482	4.56407	2594	809	7.10985	2.30858	12.0473	3.58332
436584	NM_001242770	gcgb	glucagon b	protein_coding	NP_001229699.1	ZDB-GENE-040712-2	3.94375	2.59302	7.53518e-14	1.62218e-12	3.3933	1.76906	406	86	10.6374	2.34341	18.0245	3.63739
436585	NM_001002314	hic1	hypermethylated in cancer 1	protein_coding	NP_001002314.1	ZDB-GENE-040713-2	2.41446	1.43206	2.75888e-05	0.000173943	2.23978	1.34494	159	55	0.978254	0.347985	1.6576	0.540133
436586	NM_001002315	ccm2	cerebral cavernous malformation 2	protein_coding	NP_001002315.1	ZDB-GENE-040712-6	-2.36357	0.977023	0.000144088	0.000765739	1.1026	1.89389	49	97	0.331989	0.681659	0.562538	1.05805
436603	NM_001002331	agxta	alanine-glyoxylate aminotransferase a	protein_coding	NP_001002331.1	ZDB-GENE-040718-16	-11.2811	2.98912	7.54402e-36	5.34254e-34	1.19403	3.95994	55	520	0.612694	6.09562	1.03818	9.46146
436604	NM_001002332	uox	urate oxidase	protein_coding	NP_001002332.1	ZDB-GENE-030826-24	-14.1138	3.23465	2.45795e-42	2.2188e-40	1.1642	4.21399	53	627	0.820744	10.2439	1.39071	15.9003
436609	NM_001002337	hax1	HCLS1 associated protein X-1	protein_coding	NP_001002337.1	ZDB-GENE-040718-26	-2.99323	5.70234	1.53801e-13	3.2156e-12	4.75824	6.30411	1113	2786	14.1603	36.9173	23.9939	57.302
436610	NM_001002338	pnpla3	patatin-like phospholipase domain containing 3	protein_coding	NP_001002338.1	ZDB-GENE-040718-27	2.87983	1.89256	6.62507e-08	6.95335e-07	2.68015	1.52418	231	67	1.88705	0.570851	3.19751	0.886059
436615	NM_001002343,XM_005171375,XM_021479745	gbp1	guanylate binding protein 1	protein_coding	NP_001002343.1;XP_005171432.1;XP_021335420.1	ZDB-GENE-040718-32	-2.09105	5.32944	5.90839e-07	5.3473e-06	4.75449	5.79064	1110	1941	7.30041	13.2465	12.3702	20.5609
436617	NM_001002345,XM_005160666	rxrgb	retinoid X receptor, gamma b	protein_coding	NP_001002345.1;XP_005160723.1	ZDB-GENE-040718-34	2.46498	2.75839	1.67592e-07	1.63951e-06	3.39651	2.28229	407	138	3.42742	1.20481	5.80758	1.87007
436631	NM_001002358	trim55a	tripartite motif containing 55a	protein_coding	NP_001002358.1	ZDB-GENE-040718-50	2.54128	2.28716	3.44679e-07	3.23727e-06	2.9833	1.89389	295	97	2.7602	0.943116	4.67702	1.46388
436632	NM_001002359	sccpdha	saccharopine dehydrogenase a	protein_coding	NP_001002359.1	ZDB-GENE-040718-51	-5.43254	3.14405	5.34111e-22	2.12362e-20	1.90294	3.99077	117	532	1.00714	4.78785	1.70654	7.43157
436636	NM_001002363	cd36	CD36 molecule (thrombospondin receptor)	protein_coding	NP_001002363.1	ZDB-GENE-040718-55	-2.68929	3.98183	2.79528e-10	4.13745e-09	3.25506	4.58442	365	821	3.32892	7.79716	5.64068	12.1025
436641	NM_001002368,XM_005158777	ctsl.1	cathepsin L.1	protein_coding	NP_001002368.1;XP_005158834.1	ZDB-GENE-040718-61	-50.9434	5.67732	5.95706e-96	2.61031e-93	1.569	6.66341	84	3584	0.965127	43.6384	1.63536	67.7343
436646	NM_001002373,NM_001002373_dup1,NM_001002373_dup2,XM_021480558	galm	galactose mutarotase	protein_coding	NP_001002373.1	ZDB-GENE-040718-66	-2.09826	1.5915	0.000181235	0.000933833	1.54605	2.33128	82	144	0.903365	1.71414	0.827128	1.02826
436649	NM_001002376,NM_001002376_dup1,NM_001002376_dup2,XM_005158508	ppp1r3ca	protein phosphatase 1, regulatory subunit 3Ca	protein_coding	NP_001002376.1	ZDB-GENE-040718-70	-2.52875	3.1091	2.28235e-08	2.56436e-07	2.55352	3.73569	208	440	1.68877	3.62898	1.24914	1.66429
436650	NM_001002377	ccdc62	coiled-coil domain containing 62	protein_coding	NP_001002377.1	ZDB-GENE-040718-71	2.2382	1.22281	0.000195835	0.000999028	2.04887	1.26314	134	50	3.32376	1.28724	5.63193	1.99803
436651	NM_001002378	zgc:92066	zgc:92066	protein_coding	NP_001002378.1	ZDB-GENE-040718-72	-3.51982	8.81972	8.39243e-18	2.52169e-16	7.65056	9.46093	8538	25130	149.248	457.438	252.892	710.023
436672	NM_001002399,NM_001002399_dup1,XM_005162686	pdha1b	pyruvate dehydrogenase (lipoamide) alpha 1b	protein_coding	NP_001002399.1	ZDB-GENE-040718-96	2.05034	5.90153	9.23598e-07	8.01677e-06	6.34469	5.32729	3428	1398	30.9875	13.1618	29.2092	11.7495
436676	NM_001002403	dnase1l1l	deoxyribonuclease I-like 1-like	protein_coding	NP_001002403.1	ZDB-GENE-040718-100	-46.6468	6.19299	1.16305e-97	5.55963e-95	2.02417	7.17231	131	5115	1.84894	75.3313	3.13293	116.927
436678	NM_001002405,NM_001002405_dup1	arr3a	arrestin 3a, retinal (X-arrestin)	protein_coding	NP_001002405.1	ZDB-GENE-040718-102	2.60299	8.78791	3.75693e-11	6.13505e-10	9.32091	7.94434	27269	8760	245.272	82.3312	415.6	82.1839
436680	NM_001002407,XM_021468047	lim2.4	lens intrinsic membrane protein 2.4	protein_coding	NP_001002407.1;XP_021323722.1	ZDB-GENE-040718-104	-18.5068	7.02482	7.85623e-70	1.51596e-67	3.84273	7.95464	570	8823	9.16922	151.686	15.5368	235.443
436681	NM_001002408	crygm2d13	crystallin, gamma M2d13	protein_coding	NP_001002408.1	ZDB-GENE-040718-105	3.66727	4.02569	5.39204e-16	1.4141e-14	4.72668	2.99003	1088	248	27.6072	6.5554	46.7789	10.1751
436683	NM_001002410,XM_005157649	cryba1a	crystallin, beta A1a	protein_coding	NP_001002410.1;XP_005157706.1	ZDB-GENE-040718-107	-33.0445	12.5339	3.29788e-96	1.47584e-93	8.44871	13.491	14878	411111	234.983	6876.74	398.166	10673.9
436687	NM_001002414	cabp1b	calcium binding protein 1b	protein_coding	NP_001002414.1	ZDB-GENE-040718-111	2.46482	1.07453	7.47603e-05	0.000428339	1.96483	1.12178	124	42	1.43637	0.501666	2.43385	0.778672
436716	NM_001002443,NM_001002443_dup1	opn1lw2	opsin 1 (cone pigments), long-wave-sensitive, 2	protein_coding	NP_001002443.1	ZDB-GENE-040718-141	-8.02331	8.98983	4.14977e-42	3.71413e-40	6.82885	9.82193	4812	32285	47.4082	331.231	80.3307	514.128
436720	NM_001002447,XM_005156283,XM_005156285,XM_017358446	myoz1b	myozenin 1b	protein_coding	NP_001002447.1;XP_005156340.1;XP_005156342.1;XP_017213935.1	ZDB-GENE-040718-146	5.29675	2.92238	4.57525e-20	1.62828e-18	3.76782	1.75715	539	85	6.51747	1.06719	11.0435	1.65646
436723	NM_001002450,NM_001002450_dup1,XM_021480052	meox1	mesenchyme homeobox 1	protein_coding	NP_001002450.2;XP_021335727.1	ZDB-GENE-040718-149	2.6868	-0.441935	0.00470459	0.0157416	0.988048	0.447893	42	13	0.288025	0.090915	0.186825	0
436725	NM_001002452,NM_001002452_dup1,NM_001002452_dup2	acp5b	acid phosphatase 5b, tartrate resistant	protein_coding	NP_001002452.1	ZDB-GENE-040718-151	-2.46296	-0.710496	0.0187538	0.0501397	0.409074	0.857666	14	29	0.168401	0.356411	0.285347	0.27218
436730	NM_001002457,XM_017357664,XM_021478639	egfl6	EGF-like-domain, multiple 6	protein_coding	NP_001002457.1;XP_017213153.1;XP_021334314.1	ZDB-GENE-040718-157	4.06196	0.829947	2.24277e-08	2.52258e-07	1.90294	0.741649	117	24	0.993983	0.188207	1.68425	0.29213
436734	NM_001002461,NM_001002461_dup1	txn	thioredoxin	protein_coding	NP_001002461.1	ZDB-GENE-040718-162	-3.28269	6.36922	8.68318e-16	2.23541e-14	5.30709	6.99648	1648	4524	40.1236	114.706	67.9873	178.043
436739	NM_001002466,NM_001002466_dup1,XM_021479154,XM_021479155	brap	BRCA1 associated protein	protein_coding	NP_001002466.1	ZDB-GENE-040718-168	-8.62548	5.13243	2.93459e-40	2.44933e-38	3.05008	5.99639	311	2244	2.37002	18.2677	3.55228	28.3546
436756	NM_001002483,NM_001002483_dup1,NM_001002483_dup2	sox1a	SRY (sex determining region Y)-box 1a	protein_coding	NP_001002483.1	ZDB-GENE-040718-186	-7.80688	-0.208877	8.46169e-09	1.02816e-07	0.247725	1.31278	8	53	0.056495	0.442961	0.046701	0.687553
436762	NM_001002489	sdhda	succinate dehydrogenase complex, subunit D, integral membrane protein a	protein_coding	NP_001002489.1	ZDB-GENE-040718-192	2.71241	2.0267	1.60569e-07	1.57448e-06	2.77698	1.65822	250	77	4.12885	1.32693	6.99613	2.05963
436763	NM_001327808,XM_009306861,XM_009306862,XM_009306863	ttyh2	tweety family member 2	protein_coding	NP_001314737.1;XP_009305136.1;XP_009305137.1;XP_009305138.1	ZDB-GENE-040718-193	-2.17071	0.742987	0.00118179	0.00481343	1.02172	1.69612	44	80	0.25055	0.478852	0.424543	0.743263
436765	NM_001002492,NM_001002492_dup1	cmtm4	CKLF-like MARVEL transmembrane domain containing 4	protein_coding	NP_001002492.1	ZDB-GENE-040718-195	-14.5475	1.94867	5.52572e-30	3.21057e-28	0.577005	3.03508	21	257	0.218152	2.8247	0.140991	4.38442
436766	NM_001002493,XM_005160857	jdp2b	Jun dimerization protein 2b	protein_coding	NP_001002493.1;XP_005160914.1	ZDB-GENE-040718-197	-20.8558	3.79294	1.51892e-55	2.08807e-53	1.17919	4.77797	54	944	0.763755	14.0455	1.29414	21.8011
436811	NM_001002538,XM_005167887	ppp1r1c	protein phosphatase 1, regulatory (inhibitor) subunit 1C	protein_coding	NP_001002538.1;XP_005167944.1	ZDB-GENE-040718-273	2.38103	2.16106	3.33643e-06	2.61652e-05	2.84908	1.84973	265	93	3.75622	1.36572	6.36472	2.11983
436825	NM_001002552,XM_009296202	s100b	S100 calcium binding protein, beta (neural)	protein_coding	NP_001002552.1;XP_009294477.1	ZDB-GENE-040718-290	2.80321	2.56836	7.91723e-09	9.7098e-08	3.26914	2.02871	369	110	4.65473	1.43783	7.88719	2.23176
436836	NM_001002563,XM_005158637	stmn4l	stathmin-like 4, like	protein_coding	NP_001002563.1;XP_005158694.1	ZDB-GENE-040718-301	5.29832	4.54113	2.9901e-25	1.41327e-23	5.32321	3.06436	1667	263	21.5573	3.52007	36.5277	5.46377
436841	NM_001002568	gc	group-specific component (vitamin D binding protein)	protein_coding	NP_001002568.2	ZDB-GENE-040718-307	-3.78184	0.995719	1.34108e-08	1.57404e-07	0.863608	2.03858	35	111	0.327596	1.08993	0.555094	1.69176
436842	NM_001002569	tpmt.1	thiopurine S-methyltransferase, tandem duplicate 1	protein_coding	NP_001002569.2	ZDB-GENE-050522-141	-4.43892	5.17532	3.93928e-22	1.57819e-20	3.83565	5.90563	567	2105	9.22031	35.6493	15.6233	55.3338
436843	NM_001002570	zgc:92749	zgc:92749	protein_coding	NP_001002570.1	ZDB-GENE-040718-309	-2.1447	2.3866	1.82499e-05	0.000119654	2.10492	3.01523	141	253	2.18711	4.07864	3.70595	6.33076
436844	NM_001045862	aqp12	aquaporin 12	protein_coding	NP_001039327.1	ZDB-GENE-040718-310	-62.963	4.11531	3.43171e-80	9.75393e-78	0.621602	5.13374	23	1218	0.351198	19.4415	0.595086	30.1765
436849	NM_001002576,NM_001002576_dup1,NM_001012315,NM_001012315_dup1	hrsp12	heat-responsive protein 12	protein_coding	NP_001002576.2;NP_001012315.1	ZDB-GENE-040718-315	-3.01958	3.56619	9.15921e-12	1.60538e-10	2.7819	4.22915	251	634	3.37776	8.88632	4.61324	0.861495
436854	NM_001002581	crygm2d8	crystallin, gamma M2d8	protein_coding	NP_001002581.2	ZDB-GENE-040718-321	40.3072	3.40131	1.0015e-59	1.54886e-57	4.42242	0.588867	873	18	21.5438	0.455856	36.5048	0.707567
436855	NM_001002582	crygm2d15	crystallin, gamma M2d15	protein_coding	NP_001002582.1	ZDB-GENE-040718-322	17.669	2.48643	1.2269e-36	8.99143e-35	3.5165	0.667279	446	21	11.0842	0.532388	18.7816	0.826359
436857	NM_001002584,XM_005167477	cryba2b	crystallin, beta A2b	protein_coding	NP_001002584.1;XP_005167534.1	ZDB-GENE-040718-324	-19.7924	10.2276	1.62165e-75	3.87593e-73	6.86204	11.1571	4925	81513	104.146	1784.41	176.469	2769.71
436859	NM_001002586	cryba1b	crystallin, beta A1b	protein_coding	NP_001002586.1	ZDB-GENE-040718-326	-9.05552	7.29106	8.64949e-46	8.91788e-44	5.00648	8.14492	1330	10072	20.017	157.855	33.9177	245.018
436860	NM_001002587	lim2.3	lens intrinsic membrane protein 2.3	protein_coding	NP_001002587.1	ZDB-GENE-040718-327	-24.1551	7.3558	3.61843e-80	1.01475e-77	3.80938	8.30179	556	11233	11.3693	239.306	19.2647	371.445
436863	NM_001002590	hrasls	HRAS-like suppressor	protein_coding	NP_001002590.2	ZDB-GENE-040718-330	-9.66387	3.63108	5.53787e-37	4.14513e-35	1.73042	4.55034	99	801	1.85212	15.7425	3.13832	24.435
436869	NM_001002596	zgc:92313	zgc:92313	protein_coding	NP_001002596.1	ZDB-GENE-040718-339	-2.10498	2.74993	1.20224e-05	8.25285e-05	2.40835	3.33244	184	324	1.93242	3.54957	3.27438	5.50955
436907	NM_001002634,NM_001002634_dup1	nipal3	NIPA-like domain containing 3	protein_coding	NP_001002634.1	ZDB-GENE-040718-379	-2.0446	4.22624	3.10035e-06	2.44048e-05	3.73013	4.70549	524	896	2.98241	5.31221	3.98204	4.29555
436917	NM_001002644	notum1b	notum pectinacetylesterase homolog 1b (Drosophila)	protein_coding	NP_001002644.1	ZDB-GENE-040718-391	2.92124	1.18145	1.98799e-06	1.62067e-05	2.09705	1.08416	140	40	0.896986	0.263588	1.5199	0.409134
436925	NM_001002652,XM_005163807,XM_005163808,XM_009299277,XM_009299278,XM_009299279	cacnb1	calcium channel, voltage-dependent, beta 1 subunit	protein_coding	NP_001002652.1;XP_005163864.2;XP_005163865.2;XP_009297552.1;XP_009297553.1;XP_009297554.1	ZDB-GENE-040718-399	2.84496	3.08287	6.12048e-10	8.64554e-09	3.74784	2.42454	531	156	1.41707	0.432482	2.40116	0.671287
436926	NM_001002653	serpinb1	serpin peptidase inhibitor, clade B (ovalbumin), member 1	protein_coding	NP_001002653.1	ZDB-GENE-040718-400	-23.3441	10.5498	4.50569e-82	1.35383e-79	6.95592	11.4898	5259	102660	65.1557	1324.58	110.403	2055.98
436935	NM_001002662,NM_001002662_dup1	rgs2	regulator of G protein signaling 2	protein_coding	NP_001002662.2	ZDB-GENE-040718-410	2.01559	2.12865	0.00013545	0.000725656	2.75713	1.94724	246	102	3.57297	1.54624	6.0542	2.40003
436937	NM_001002664,XM_021468809	nipal4	NIPA-like domain containing 4	protein_coding	NP_001002664.1;XP_021324484.1	ZDB-GENE-040718-412	-2.03564	2.1979	9.03377e-05	0.000507227	1.99904	2.82879	128	218	0.663745	1.18076	1.12468	1.83275
436942	NM_001002669,NM_001002669_dup1	zgc:91940	zgc:91940	protein_coding	NP_001002669.1	ZDB-GENE-040718-418	-2.52524	2.01422	9.37659e-07	8.12265e-06	1.70991	2.75291	97	205	0.978368	2.16484	0.995359	2.74731
436943	NM_001002670,NM_001002670_dup1,XM_021476081	cryabb	crystallin, alpha B, b	protein_coding	NP_001002670.1;XP_021331756.1	ZDB-GENE-040718-419	-4.43374	6.89324	1.84544e-23	7.82563e-22	5.48357	7.60698	1868	6926	13.3618	51.7517	22.6408	80.3276
436952	NM_001002679,XM_005168476	rab3db	RAB3D, member RAS oncogene family, b	protein_coding	NP_001002679.1;XP_005168533.1	ZDB-GENE-040718-428	-17.3507	1.79879	9.11344e-31	5.44554e-29	0.459082	2.91702	16	234	0.144919	2.2971	0.245557	3.5655
436958	NM_001002685,NM_001002685_dup1,XM_021468810	gpat3	glycerol-3-phosphate acyltransferase 3	protein_coding	NP_001002685.1;XP_021324485.1	ZDB-GENE-040718-436	-2.685	0.81849	3.46671e-05	0.000213265	0.953575	1.81571	40	90	0.366828	0.642975	0.62157	0.666059
436975	NM_001002702,XM_005168498	crebl2	cAMP responsive element binding protein-like 2	protein_coding	NP_001002702.2;XP_005168555.1	ZDB-GENE-040718-456	-3.03117	3.94217	2.60395e-12	4.8665e-11	3.10608	4.58946	325	824	6.92947	18.7864	11.7416	29.1598
436996	NM_001002723	zgc:92594	zgc:92594	protein_coding	NP_001002723.1	ZDB-GENE-040718-482	-6.2411	5.20911	3.39178e-31	2.0678e-29	3.48667	6.0165	436	2276	4.59788	25.0219	7.79086	38.8383
437008	NM_001002735,NM_001002735_dup1,XM_021477464,XM_021477465,XM_021477466,XM_021477467	lctla	lactase-like a	protein_coding	NP_001002735.1;XP_021333139.1;XP_021333140.1;XP_021333141.1;XP_021333142.1	ZDB-GENE-040718-233	-69.2198	9.65286	7.21481e-125	7.98679e-122	4.58044	10.6331	979	56674	6.12223	381.996	5.92949	282.153
437012	NM_001002739	hid1b	HID1 domain containing b	protein_coding	NP_001002739.1	ZDB-GENE-040718-239	-6.63101	-0.404729	3.42974e-07	3.22475e-06	0.247725	1.17643	8	45	0.041073	0.266697	0.069596	0.41396
437014	NM_001002741,NM_001002741_dup1,XM_005169285	rnpep	arginyl aminopeptidase (aminopeptidase B)	protein_coding	NP_001002741.1	ZDB-GENE-040718-241	-2.18141	2.72906	5.17091e-06	3.86632e-05	2.3631	3.32843	177	323	1.32726	2.48877	1.56969	2.44115
437020	NM_001002747	ube2b	ubiquitin-conjugating enzyme E2B (RAD6 homolog)	protein_coding	NP_001002747.1	ZDB-GENE-040718-247	-2.34327	3.43299	1.24741e-07	1.25595e-06	2.89522	4.00845	275	539	2.12224	4.3276	3.59602	6.71718
437026	NM_001002753,NR_131952	ccdc103	coiled-coil domain containing 103	protein_coding	NP_001002753.1	ZDB-GENE-040718-253	2.73966	-0.766948	0.00660661	0.020981	0.825989	0.356184	33	10	0.223715	0.070186	0.379074	0.108941
442930	NM_001002873	ctdp1	CTD (carboxy-terminal domain, RNA polymerase II, polypeptide A) phosphatase, subunit 1	protein_coding	NP_001002873.1	ZDB-GENE-040720-1	-3.35184	1.28055	3.03232e-08	3.34972e-07	1.07079	2.23158	47	132	0.250886	0.738855	0.425113	1.14683
445029	NM_001003423	tnni2b.2	troponin I type 2b (skeletal, fast), tandem duplicate 2	protein_coding	NP_001003423.1	ZDB-GENE-040801-9	3.77704	2.70067	1.68729e-13	3.51722e-12	3.48063	1.88297	434	96	8.77526	2.00462	14.8692	3.11152
445034	NM_001003428	crygn2	crystallin, gamma N2	protein_coding	NP_001003428.1	ZDB-GENE-040801-16	-12.1634	8.18416	1.2728e-56	1.7729e-54	5.49784	9.0728	1887	19194	30.0347	318.157	50.8922	493.834
445036	NM_001003430	grifin	galectin-related inter-fiber protein	protein_coding	NP_001003430.1	ZDB-GENE-040801-163	-3.66679	8.39869	8.87285e-19	2.83191e-17	7.18608	9.05339	6176	18937	143.837	459.26	243.723	712.851
445049	NM_001003729	zgc:92137	zgc:92137	protein_coding	NP_001003729.1	ZDB-GENE-040801-179	4.24956	0.558589	1.04084e-07	1.05707e-06	1.70991	0.615481	97	19	0.946916	0.184098	1.6045	0.285752
445054	NM_001003448	zgc:92113	zgc:92113	protein_coding	NP_001003448.1	ZDB-GENE-040801-184	2.74827	3.48548	5.31966e-10	7.60628e-09	4.11448	2.79426	697	212	6.47239	2.04932	10.9671	3.1809
445063	NM_001003457,XR_002459132	zgc:92429	zgc:92429	protein_coding	NP_001003457.1	ZDB-GENE-040801-194	2.13154	1.38376	0.000302441	0.00146505	2.15887	1.39188	148	58	1.27727	0.524934	2.16427	0.814788
445079	NM_001003473,XM_005159916,XM_009292085	gpalpp1	GPALPP motifs containing 1	protein_coding	NP_001003473.1;XP_005159973.1;XP_009290360.1	ZDB-GENE-040801-212	2.39545	3.82695	3.17878e-08	3.50416e-07	4.38733	3.21988	851	297	7.90289	2.90351	13.391	4.50674
445085	NM_001003479,NM_001003479_dup1	rasgef1bb	RasGEF domain family, member 1Bb	protein_coding	NP_001003479.1	ZDB-GENE-040801-220	2.14724	4.15608	7.54333e-07	6.67756e-06	4.65742	3.61888	1035	403	7.73801	3.13641	5.41126	4.86825
445086	NM_001003480,XM_009304971	zgc:92380	zgc:92380	protein_coding	NP_001003480.1;XP_009303246.1	ZDB-GENE-040801-221	-2.2273	7.74032	2.86833e-08	3.17653e-07	7.0606	8.20995	5658	10538	51.056	99.1442	86.5117	153.889
445094	NM_001003488,XM_005163113	pkmb	pyruvate kinase, muscle, b	protein_coding	NP_001003488.1;XP_005163170.3	ZDB-GENE-040801-230	2.56198	3.43901	8.04978e-09	9.81514e-08	4.04455	2.81737	662	216	4.30639	1.5767	7.29694	2.44732
445095	NM_001003489	tm4sf4	transmembrane 4 L six family member 4	protein_coding	NP_001003489.1	ZDB-GENE-040801-231	-15.0132	4.23136	1.5841e-51	1.91485e-49	1.74057	5.17794	100	1257	1.35944	17.812	2.3035	27.6472
445102	NM_001003496,XM_009296648	c8a	complement component 8, alpha polypeptide	protein_coding	NP_001003496.1;XP_009294923.1	ZDB-GENE-040801-239	-2.70241	1.32615	2.62228e-06	2.09583e-05	1.22327	2.20554	57	129	0.43796	1.03179	0.7421	1.60151
445109	NM_001003503,NM_001003503_dup1,XM_021476083	elac1	elaC ribonuclease Z 1	protein_coding	NP_001003503.1	ZDB-GENE-040801-246	2.02412	3.07189	2.2889e-05	0.000146731	3.60523	2.70414	477	197	5.651	2.3954	8.05713	2.51387
445125	NM_001003519,XM_005168776	pltp	phospholipid transfer protein	protein_coding	NP_001003519.1;XP_005168833.1	ZDB-GENE-040801-22	2.40722	3.75754	3.25843e-08	3.58632e-07	4.32296	3.15332	812	282	6.83855	2.46603	11.5876	3.8277
445140	NM_001003534,NM_001003534_dup1	mipa	major intrinsic protein of lens fiber a	protein_coding	NP_001003534.1	ZDB-GENE-040801-41	-48.8435	9.54172	4.39104e-112	3.42062e-109	4.94968	10.5135	1277	52162	6.95111	295.806	11.7783	459.142
445145	NM_001003539,NM_001003539_dup1	nudcd2	NudC domain containing 2	protein_coding	NP_001003539.1	ZDB-GENE-040801-49	-2.1325	3.032	4.923e-06	3.70202e-05	2.63192	3.59567	222	396	3.98188	7.40431	6.74709	11.4928
445154	NM_001003548	rab35b	RAB35, member RAS oncogene family b	protein_coding	NP_001003548.1	ZDB-GENE-040801-62	-3.03162	3.79313	3.64978e-12	6.73384e-11	2.97473	4.4467	293	743	4.62699	12.2461	7.84019	19.0081
445158	NM_001003552	slc16a9b	solute carrier family 16, member 9b	protein_coding	NP_001003552.1	ZDB-GENE-040801-69	2.14216	4.09181	8.53693e-07	7.47221e-06	4.59449	3.56186	989	386	5.99531	2.43637	10.1587	3.78167
445161	NM_001003555	cenpp	centromere protein P	protein_coding	NP_001003555.1	ZDB-GENE-040801-74	-4.03843	-0.114741	7.34176e-06	5.32113e-05	0.434294	1.27988	15	51	0.206918	0.731919	0.350612	1.13607
445167	NM_001003561,XM_005161168	stx2a	syntaxin 2a	protein_coding	NP_001003561.1;XP_005161225.1	ZDB-GENE-040801-80	4.29154	1.67451	5.97753e-12	1.0755e-10	2.59884	1.12178	216	42	1.10059	0.219633	1.86489	0.340909
445169	NM_001003563,NM_001003563_dup1	zgc:101100	zgc:101100	protein_coding	NP_001003563.1	ZDB-GENE-040801-82	2.26831	-0.17254	0.00878151	0.0267296	1.1026	0.588867	49	18	0.49848	0.188205	0.580429	0.235434
445172	NM_001003566	phpt1	phosphohistidine phosphatase 1	protein_coding	NP_001003566.1	ZDB-GENE-040801-85	-2.05023	2.793	2.05846e-05	0.000133587	2.46451	3.36025	193	331	2.77122	4.96118	4.69569	7.70061
445181	NM_001003575,NM_001003575_dup1,XM_021472211	pibf1	progesterone immunomodulatory binding factor 1	protein_coding	NP_001003575.1	ZDB-GENE-040801-94	2.32355	1.14284	0.000135718	0.000726722	1.99904	1.19419	128	46	0.792238	1.93069	1.34241	1.91423
445187	NM_001003581	trim101	tripartite motif containing 101	protein_coding	NP_001003581.1	ZDB-GENE-040801-100	2.68553	0.782897	5.34412e-05	0.000315384	1.77058	0.923046	103	32	0.89166	0.28928	1.51087	0.449013
445192	NM_001003586	mfsd6l	major facilitator superfamily domain containing 6-like	protein_coding	NP_001003586.1	ZDB-GENE-040801-105	-2.02249	0.395914	0.00570193	0.0185418	0.882056	1.43734	36	61	0.281323	0.501694	0.476686	0.778716
445196	NM_001003590	arf4a	ADP-ribosylation factor 4a	protein_coding	NP_001003590.1	ZDB-GENE-040801-109	-3.97963	2.82475	4.70167e-15	1.14192e-13	1.93863	3.61888	121	403	1.474	5.11756	2.49761	7.94334
445197	NM_001003591,XM_005161093	fam219aa	family with sequence similarity 219, member Aa	protein_coding	NP_001003591.1;XP_005161150.1	ZDB-GENE-040801-110	-3.07898	2.32195	8.87145e-10	1.23083e-08	1.78045	3.0883	104	268	0.697404	1.70374	1.18171	2.64449
445203	NM_001003597,XM_005170917	mnd1	meiotic nuclear divisions 1 homolog (S. cerevisiae)	protein_coding	NP_001003597.1;XP_005170974.1	ZDB-GENE-040801-116	-2.34939	1.8186	8.96796e-06	6.36595e-05	1.62484	2.56087	89	175	0.977788	2.00949	1.65681	3.11908
445222	NM_001003616,NM_001003616_dup1,XM_005167827	rcan1a	regulator of calcineurin 1a	protein_coding	NP_001003616.1	ZDB-GENE-040801-135	-3.30646	6.69271	4.87333e-16	1.28447e-14	5.61552	7.3202	2051	5671	12.5599	37.2925	15.6503	37.9237
445226	NM_001003620,NM_001003620_dup1	casq1a	calsequestrin 1a	protein_coding	NP_001003620.2	ZDB-GENE-040801-139	9.49044	0.771934	6.92734e-15	1.65571e-13	1.98203	0.387406	126	11	0.652492	0.055561	0.815493	0.069599
445241	NM_001003635,NM_001003635_dup1	zgc:100920	zgc:100920	protein_coding	NP_001003635.1	ZDB-GENE-040801-156	2.1897	1.05379	0.000476955	0.00218415	1.91195	1.17643	118	45	1.21747	0.479911	1.79407	0.744905
445246	NM_001003640	aurka	aurora kinase A	protein_coding	NP_001003640.1	ZDB-GENE-040801-161	-2.42721	1.33656	2.54535e-05	0.000161733	1.29386	2.17902	62	126	0.552417	1.16621	0.936042	1.81015
445250	NM_001003644,NM_001003644_dup1	neu3.2	sialidase 3 (membrane sialidase), tandem duplicate 2	protein_coding	NP_001003644.2	ZDB-GENE-040801-262	-2.27842	2.96164	9.01102e-07	7.83824e-06	2.51858	3.55844	202	385	2.13924	4.25824	3.62483	6.60953
445278	NM_001003733	cldn8	claudin 8	protein_coding	NP_001003733.1	ZDB-GENE-011018-1	4.80085	-2.14254	0.0267805	0.0670804	0.35727	0.0786196	12	2	0.091865	0.014447	0.155661	0.022424
445280	NM_001003735	cd81b	CD81 molecule b	protein_coding	NP_001003735.1	ZDB-GENE-040808-52	-3.30447	-0.07935	8.549e-05	0.00048168	0.507414	1.26314	18	50	0.208216	0.604274	0.352812	0.937938
445282	NM_001003737	zgc:92041	zgc:92041	protein_coding	NP_001003737.1	ZDB-GENE-040808-55	-17.2795	6.765	7.26842e-67	1.29556e-64	3.68881	7.69071	508	7342	8.60683	129.545	14.5838	201.076
445287	NM_001003742,NM_001003742_dup1	hpdb	4-hydroxyphenylpyruvate dioxygenase b	protein_coding	NP_001003742.1	ZDB-GENE-040808-62	2.16528	-0.460415	0.0264049	0.0663689	0.936025	0.505946	39	15	0.371616	0.14546	0.629684	0.225779
445308	NM_001003765	cthrc1a	collagen triple helix repeat containing 1a	protein_coding	NP_001003765.1	ZDB-GENE-040808-22	2.36632	2.27214	2.63309e-06	2.10257e-05	2.94433	1.93673	286	101	3.4997	1.27876	5.93006	1.98485
445316	NM_001003773	cdkl1	cyclin-dependent kinase-like 1 (CDC2-related kinase)	protein_coding	NP_001003773.1	ZDB-GENE-040808-34	3.78454	0.75094	1.36616e-07	1.36376e-06	1.8288	0.741649	109	24	1.12082	0.247939	1.89917	0.384845
445318	NM_001003775,NM_001003775_dup1	nrros	negative regulator of reactive oxygen species	protein_coding	NP_001003775.1	ZDB-GENE-040808-36	2.05995	0.994917	0.00156415	0.00613096	1.8477	1.17643	111	45	0.725419	0.308471	0.827303	0.4788
445324	NM_001003781,XM_005171838,XM_005171840	tango2	transport and golgi organization 2 homolog (Drosophila)	protein_coding	NP_001003781.1;XP_005171895.1;XP_005171897.1	ZDB-GENE-040808-42	-2.49893	4.82278	1.28556e-09	1.75011e-08	4.10077	5.3709	690	1442	4.62212	9.78828	7.83194	15.1931
445326	NM_001003783,NM_001003783_dup1	akr1a1a	aldo-keto reductase family 1, member A1a (aldehyde reductase)	protein_coding	NP_001003783.1	ZDB-GENE-040808-44	-12.0694	0.339878	8.63252e-15	2.04699e-13	0.247725	1.72085	8	82	0.109721	1.20489	0.185916	1.8702
445358	XM_017357438,XM_021478397	obscna	obscurin, cytoskeletal calmodulin and titin-interacting RhoGEF a, transcript variant X2	protein_coding	XP_017212927.2;XP_021334072.1	ZDB-GENE-040812-4	3.96937	3.88396	2.52888e-17	7.36704e-16	4.61256	2.78843	1002	211	0.673229	0.147223	1.14075	0.228516
445380	NM_001003857	itga2b	integrin, alpha 2b	protein_coding	NP_001003857.1	ZDB-GENE-051031-1	-3.32929	0.591356	2.20826e-06	1.78846e-05	0.747673	1.70854	29	81	0.119192	0.35246	0.201965	0.54708
445410	NM_001007107,XM_017359237	il12a	interleukin 12a	protein_coding	NP_001007108.2;XP_017214726.1	ZDB-GENE-060724-1	-3.98473	-1.56524	0.00664724	0.0210654	0.159737	0.561752	5	17	0.035396	0.141567	0.059976	0.219737
445472	NM_001004110,XM_005158836,XM_009293188,XM_021467147,XM_021467148,XR_002455901	myo6b	myosin VIb	protein_coding	NP_001004110.1;XP_005158893.1;XP_009291463.1;XP_021322822.1;XP_021322823.1	ZDB-GENE-030318-3	2.32776	5.3667	1.22437e-08	1.44675e-07	5.87353	4.68679	2461	884	5.72436	2.12685	9.69963	3.30124
445503	NM_001004007,NM_001328273,XM_017352468	matn3a	matrilin 3a	protein_coding	NP_001004007.1;NP_001315202.1;XP_017207957.1	ZDB-GENE-040822-21	13.1019	1.18477	1.30813e-20	4.84401e-19	2.34326	0.387406	174	11	1.29429	0.078039	2.19311	0.12113
445504	NM_001004118,NM_001004118_dup1,XM_005157420	gdpd1	glycerophosphodiester phosphodiesterase domain containing 1	protein_coding	NP_001004118.1	ZDB-GENE-040822-22	2.12759	4.5916	6.45189e-07	5.77201e-06	5.07524	4.03333	1397	549	8.48406	3.49932	8.50774	4.22628
445505	NM_001004008,XM_005165300	fbp2	fructose-1,6-bisphosphatase 2	protein_coding	NP_001004008.1;XP_005165357.1	ZDB-GENE-040822-23	4.91133	0.795013	1.06421e-09	1.46106e-08	1.91195	0.641612	118	20	1.05784	0.184081	1.79245	0.285726
445508	NM_001004010	calcrla	calcitonin receptor-like a	protein_coding	NP_001004010.1	ZDB-GENE-040822-26	-2.79809	-0.105014	0.000674911	0.00296603	0.554179	1.21174	20	47	0.181561	0.443699	0.307646	0.688698
445510	NM_001004011	dtd2	D-tyrosyl-tRNA deacylase 2	protein_coding	NP_001004011.1	ZDB-GENE-040822-45	2.07222	2.39839	4.36684e-05	0.000263325	3.0045	2.13371	300	121	6.05151	2.53205	10.254	3.93018
445567	NM_001004017,XM_009306027,XM_017358220	st3gal8	ST3 beta-galactoside alpha-2,3-sialyltransferase 8	protein_coding	NP_001004017.1;XP_009304302.1;XP_017213709.1	ZDB-GENE-050417-286	-3.58148	1.62794	6.3882e-10	8.99503e-09	1.22327	2.53322	57	171	0.454452	1.46129	0.770045	2.26817
445818	NM_001005400	cthl	cystathionase (cystathionine gamma-lyase), like	protein_coding	NP_001005400.1	ZDB-GENE-040905-3	3.07348	2.23112	2.21746e-09	2.92229e-08	2.99606	1.70854	298	81	2.47754	0.699753	4.19805	1.08614
447807	NM_001004546	slc51a	solute carrier family 51, alpha subunit	protein_coding	NP_001004546.1	ZDB-GENE-040912-10	-2.39373	4.34902	1.28911e-08	1.51728e-07	3.69925	4.89257	512	1025	5.11771	10.6798	8.67169	16.5769
447810	NM_001004549,XM_021479161,XM_021479162	nt5c2l1	5'-nucleotidase, cytosolic II, like 1	protein_coding	NP_001004549.1;XP_021334836.1;XP_021334837.1	ZDB-GENE-031006-8	-2.34153	6.62791	5.02454e-09	6.332e-08	5.91107	7.12476	2527	4948	17.3827	35.3704	29.4541	54.901
447821	NM_001004560	sav1	salvador family WW domain containing protein 1	protein_coding	NP_001004560.1	ZDB-GENE-040912-28	-3.03127	4.67352	4.43062e-13	8.91762e-12	3.7703	5.29781	540	1369	3.66304	9.67172	6.20684	15.0122
447825	NM_001328216	mfsd6b	major facilitator superfamily domain containing 6b	protein_coding	NP_001315145.1	ZDB-GENE-040912-84	-4.26425	4.0485	1.9476e-19	6.50219e-18	2.86308	4.79553	268	956	1.32151	4.9109	2.23923	7.62256
447832	NM_001004571,XM_017351625,XM_017351626,XM_017351627,XM_021467150,XM_021467151	capn3a	calpain 3a, (p94)	protein_coding	NP_001004571.1;XP_017207114.1;XP_017207115.1;XP_017207116.1;XP_021322825.1;XP_021322826.1	ZDB-GENE-040912-97	-3.63634	2.93179	7.20424e-14	1.55253e-12	2.09705	3.6926	140	426	0.62799	2.0373	1.0641	3.16224
447836	NM_001004575	pfkma	phosphofructokinase, muscle a	protein_coding	NP_001004575.1	ZDB-GENE-040912-135	2.39764	2.55442	8.18997e-07	7.18567e-06	3.20098	2.14288	350	122	2.08182	0.751035	3.52753	1.16574
447843	NM_001004582	ctrl	chymotrypsin-like	protein_coding	NP_001004582.1	ZDB-GENE-040912-147	-11.2184	4.5628	1.39766e-45	1.434e-43	2.28207	5.47176	165	1549	3.0015	29.3505	5.08589	45.5571
447845	NM_001004584,NM_001004584_dup1	cavin2b	caveolae associated protein 2b	protein_coding	NP_001004584.2	ZDB-GENE-040912-149	-4.07369	6.70107	3.742e-21	1.43101e-19	5.39241	7.39267	1751	5965	7.96704	28.2583	13.4997	43.8617
447848	NM_001004587	cyp8b3	cytochrome P450, family 8, subfamily B, polypeptide 3	protein_coding	NP_001004587.2	ZDB-GENE-040912-153	-2.57881	1.09259	2.06695e-05	0.000134055	1.11825	2.00877	50	108	0.393095	0.888628	0.666078	1.3793
447851	NM_001004590,NM_001004590_dup1	cyb561d1	cytochrome b561 family, member D1	protein_coding	NP_001004590.1	ZDB-GENE-040912-157	-2.32622	-0.217584	0.00749061	0.0233559	0.577005	1.10309	21	41	0.230308	0.465378	0.362184	0.507499
447856	NM_001004595	utp3	UTP3, small subunit (SSU) processome component, homolog (S. cerevisiae)	protein_coding	NP_001004595.1	ZDB-GENE-040912-163	-2.10008	4.43519	1.07981e-06	9.24363e-06	3.90042	4.91952	595	1045	4.78777	8.75696	8.11263	13.5923
447863	NM_001004602,NM_001327970,XM_009302129,XM_009302130,XM_009302131,XM_009302132,XM_009302133,XM_009302134,XM_009302135,XM_021476838,XM_021476840,XM_021476841	bin1b	bridging integrator 1b	protein_coding	NP_001004602.2;NP_001314899.1;XP_009300404.1;XP_009300405.1;XP_009300406.1;XP_009300407.1;XP_009300408.1;XP_009300409.1;XP_009300410.1;XP_021332513.1;XP_021332515.1;XP_021332516.1	ZDB-GENE-030425-1	2.32681	4.65411	2.69397e-08	2.998e-07	5.17492	4.00845	1500	539	9.60183	3.57559	16.2698	5.54993
447866	NM_001004605	arrdc3b	arrestin domain containing 3b	protein_coding	NP_001004605.1	ZDB-GENE-040912-182	2.60531	6.81501	5.35776e-11	8.63522e-10	7.35428	5.98687	6945	2229	38.2653	12.7853	64.8386	19.8451
447868	NM_001004607	pxmp2	peroxisomal membrane protein 2	protein_coding	NP_001004607.1	ZDB-GENE-040912-184	-2.00814	0.669896	0.00438897	0.0148294	1.02172	1.6193	44	74	0.506048	0.881482	0.857472	1.36821
447869	NM_001004608,NM_001004608_dup1	tmod2	tropomodulin 2	protein_coding	NP_001004608.1	ZDB-GENE-040912-185	-2.29525	0.627183	0.000713538	0.00311043	0.936025	1.63239	39	75	0.404186	0.81504	0.684871	1.26508
447871	NM_001004610	tmem14cb	transmembrane protein 14Cb	protein_coding	NP_001004610.1	ZDB-GENE-040912-34	2.49724	-0.323769	0.00526378	0.0173531	1.03826	0.505946	45	15	1.35458	0.453496	2.29527	0.703905
447876	NM_001004615	pqlc3	PQ loop repeat containing 3	protein_coding	NP_001004615.1	ZDB-GENE-040912-40	-2.67544	1.23911	6.51052e-06	4.75637e-05	1.17919	2.13371	54	121	0.598967	1.3926	1.01492	2.16156
447890	NM_001004629,XM_005164943	ms4a17a.5	membrane-spanning 4-domains, subfamily A, member 17A.5	protein_coding	NP_001004629.1;XP_005165000.1	ZDB-GENE-040912-55	2.08756	3.82392	2.83054e-06	2.2449e-05	4.32633	3.34044	814	326	12.0673	5.01346	20.4474	7.78176
447892	NM_001025558,XM_005157730,XM_005157731,XM_005157732	zgc:101731	zgc:101731	protein_coding	NP_001020729.1;XP_005157787.1;XP_005157788.1;XP_005157789.1	ZDB-GENE-040912-57	2.65698	-0.796932	0.00916578	0.0276949	0.806805	0.356184	32	10	0.399741	0.112952	0.67734	0.175321
447893	NM_001004632,NM_001004632_dup1	anxa3a	annexin A3a	protein_coding	NP_001004632.1	ZDB-GENE-040912-58	-2.05878	4.92632	1.34284e-06	1.1284e-05	4.38248	5.38837	848	1460	10.0728	17.808	3.76746	27.6412
447895	NM_001004634	gpx1b	glutathione peroxidase 1b	protein_coding	NP_001004634.2	ZDB-GENE-040912-60	-3.47301	3.54315	2.69574e-14	5.99359e-13	2.63192	4.25265	222	645	3.93946	11.9559	6.67521	18.5576
447898	NM_001004636,XM_009302154	tmem237b	transmembrane protein 237b	protein_coding	NP_001004636.1;XP_009300429.1	ZDB-GENE-040912-63	2.33437	4.61678	2.57827e-08	2.87788e-07	5.1399	3.97029	1463	524	16.1333	5.96054	27.3369	9.25178
447903	NM_001004641	dhrs13a.2	dehydrogenase/reductase (SDR family) member 13a, tandem duplicate 2	protein_coding	NP_001004641.1	ZDB-GENE-040912-69	-2.12439	3.94838	1.32322e-06	1.1137e-05	3.44074	4.45593	421	748	6.27435	11.6306	10.6316	18.0527
447904	NM_001004642	ildr1b	immunoglobulin-like domain containing receptor 1b	protein_coding	NP_001004642.2	ZDB-GENE-040912-72	-2.17869	2.08521	2.36512e-05	0.000151111	1.86635	2.75889	113	206	0.64661	1.22875	1.09565	1.90723
447905	NM_001004643	entpd2a.1	ectonucleoside triphosphate diphosphohydrolase 2a, tandem duplicate 1	protein_coding	NP_001004643.1	ZDB-GENE-040724-187	-2.06807	5.29776	8.76443e-07	7.65541e-06	4.73432	5.75443	1094	1892	4.24865	7.6546	7.19912	11.8813
447908	NM_001004646,XM_005170028	osbpl3a	oxysterol binding protein-like 3a	protein_coding	NP_001004646.1;XP_005170085.1	ZDB-GENE-040912-77	-4.5312	3.56257	1.50324e-19	5.09142e-18	2.39556	4.345	182	690	0.922138	3.73828	1.56251	5.80246
447930	NM_001004668	mylpfb	myosin light chain, phosphorylatable, fast skeletal muscle b	protein_coding	NP_001004668.1	ZDB-GENE-040912-115	23.4807	5.41387	1.13713e-70	2.34483e-68	6.36819	2.16106	3485	124	72.5339	2.68397	122.905	4.16599
447942	NM_001004680,NM_001004680_dup1	cox6a2	cytochrome c oxidase subunit VIa polypeptide 2	protein_coding	NP_001004680.1	ZDB-GENE-040912-129	-2.2313	2.65062	3.55193e-06	2.75907e-05	2.28207	3.2668	165	308	4.99379	9.71258	5.86624	1.34504
447944	NM_001004682	fabp11a	fatty acid binding protein 11a	protein_coding	NP_001004682.1	ZDB-GENE-040912-132	-34.4024	10.91	8.76807e-98	4.28881e-95	6.77742	11.8691	4642	133542	107.137	3209.84	181.539	4982.23
448856	NM_001089351,XM_017351340	s100a1	S100 calcium binding protein A1	protein_coding	NP_001082820.1;XP_017206829.1	ZDB-GENE-040916-1	-7.63898	1.56805	4.29665e-19	1.40546e-17	0.747673	2.63428	29	186	0.676442	4.69069	1.1462	7.28076
448885	XM_009294188	tril	TLR4 interactor with leucine-rich repeats	protein_coding	XP_009292463.1	ZDB-GENE-131218-1	2.71955	-1.22882	0.0348449	0.0832644	0.621602	0.258248	23	7	0.117828	0.036198	0.199654	0.056186
448925	NM_001204123	gpatch1	G patch domain containing 1	protein_coding	NP_001191052.1	ZDB-GENE-040914-65	3.2475	5.60841	4.50604e-15	1.09821e-13	6.23818	4.58105	3181	819	15.6581	4.19483	26.5318	6.51111
449538	NM_001005580,XM_009305399	opcml	opioid binding protein/cell adhesion molecule-like	protein_coding	NP_001005580.1;XP_009303674.1	ZDB-GENE-040927-3	4.08465	0.651743	1.00053e-07	1.02156e-06	1.77058	0.667279	103	21	0.779067	0.158593	1.32009	0.246164
449545	NM_001005587,NM_001005587_dup1,NM_001005587_dup2	crata	carnitine O-acetyltransferase a	protein_coding	NP_001005587.1	ZDB-GENE-040927-17	-2.02179	3.60563	9.16885e-06	6.49103e-05	3.17503	4.10786	343	580	2.25847	3.97689	3.82686	6.17281
449552	NM_001005594,NM_001005594_dup1,NM_001005594_dup2	fkbp1ab	FK506 binding protein 1Ab	protein_coding	NP_001005594.1	ZDB-GENE-040927-9	2.9546	0.364803	8.23172e-05	0.000466051	1.49902	0.692498	78	22	2.5367	0.718983	1.55379	1.11599
449651	NM_001005923	stmn2a	stathmin 2a	protein_coding	NP_001005923.2	ZDB-GENE-041010-85	2.44905	5.74884	1.26054e-09	1.71827e-08	6.2718	5.0063	3257	1112	23.5933	8.38606	39.9777	13.0166
449652	NM_001005924,XM_005168477	tmem56b	transmembrane protein 56b	protein_coding	NP_001005924.1;XP_005168534.1	ZDB-GENE-041010-90	6.72746	5.73387	6.10388e-34	4.07565e-32	6.54719	3.88262	3951	491	14.1453	1.82916	23.9684	2.83917
449657	NM_001005928	anks6	ankyrin repeat and sterile alpha motif domain containing 6	other	.	ZDB-GENE-041010-213	-3.01132	-0.42328	0.000820646	0.00351684	0.434294	1.04554	15	38	0.760938	2.1041	1.28937	3.26593
449670	NM_001077531,XM_009299804	srl	sarcalumenin	protein_coding	NP_001070999.1;XP_009298079.1	ZDB-GENE-061110-91	2.11156	2.55143	2.26099e-05	0.000145296	3.14861	2.24015	336	133	2.69452	1.10672	4.56572	1.71782
449676	NM_001005939,NM_001005939_dup1,NM_001005939_dup2	mcfd2	multiple coagulation factor deficiency 2	protein_coding	NP_001005939.1	ZDB-GENE-041010-8	-2.10468	1.69496	0.000149161	0.000788501	1.61385	2.41699	88	155	1.21742	2.24233	1.96283	3.37662
449679	NM_205738	cav3	caveolin 3	protein_coding	NP_991301.1	ZDB-GENE-050522-426	6.34949	1.02889	5.06359e-13	1.01335e-11	2.136	0.615481	145	19	2.15125	0.286943	3.64518	0.445386
449707	XM_005160604,XM_021468631,XM_021468632,XM_021468633,XM_021468634	mylk4b	myosin light chain kinase family, member 4b, transcript variant X3	protein_coding	XP_005160661.1;XP_021324306.1;XP_021324307.1;XP_021324308.1;XP_021324309.1	ZDB-GENE-041001-128	-9.12974	-0.0157248	1.48981e-10	2.27561e-09	0.247725	1.45219	8	62	0.040241	0.333803	0.068187	0.51812
449761	XM_021478432,XM_690959	si:ch211-163l21.8	si:ch211-163l21.8	protein_coding	XP_696051.3	ZDB-GENE-041008-93	3.20917	2.29536	3.89227e-10	5.64983e-09	3.0663	1.72085	315	82	1.15987	0.312662	1.96534	0.485305
449773	NM_001005946,NM_001005946_dup1,XM_021481387,XR_002459981	zgc:103681	zgc:103681	protein_coding	NP_001005946.1	ZDB-GENE-041010-17	-5.01889	0.383356	1.13494e-08	1.34789e-07	0.507414	1.64537	18	76	0.166796	0.743969	0.282627	1.15477
449775	NM_001005948	prrg1	proline rich Gla (G-carboxyglutamic acid) 1	protein_coding	NP_001005948.1	ZDB-GENE-041010-20	-3.86514	1.40787	4.27764e-10	6.16666e-09	1.05462	2.37087	46	149	0.521452	1.77011	0.883573	2.74752
449784	NM_001005957,NM_001005957_dup1	mgst1.1	microsomal glutathione S-transferase 1.1	protein_coding	NP_001005957.1	ZDB-GENE-041010-30	-3.17804	0.441816	9.98688e-06	6.9855e-05	0.706862	1.59276	27	72	0.393231	1.10805	0.666309	1.71989
449788	NM_001005961	s100a10a	S100 calcium binding protein A10a	protein_coding	NP_001005961.1	ZDB-GENE-041010-35	-3.29585	3.05843	1.81571e-12	3.43433e-11	2.28207	3.78048	165	455	2.79709	8.05267	4.73951	12.4991
449792	NM_001005965	cryba1l2	crystallin, beta A1, like 2	protein_coding	NP_001005965.2	ZDB-GENE-041010-40	-41.2029	9.00967	6.75179e-105	4.05744e-102	4.66809	9.97649	1043	35940	9.43935	338.977	15.9945	526.151
449805	NM_001005978	glipr2l	GLI pathogenesis-related 2, like	protein_coding	NP_001005978.1	ZDB-GENE-041010-53	-2.12175	1.31511	0.000398911	0.00186451	1.36116	2.11518	67	119	0.790067	1.47928	1.33873	2.2961
449808	NM_001005981,NM_001005981_dup1,XM_005170550	kng1	kininogen 1	protein_coding	NP_001005981.1	ZDB-GENE-041010-56	-5.51559	1.62415	2.4349e-15	6.02508e-14	0.953575	2.62776	40	185	0.49853	2.45406	0.844733	3.79861
449819	NM_001005992,XR_002458999	tmbim1a	transmembrane BAX inhibitor motif containing 1a	protein_coding	NP_001005992.2	ZDB-GENE-041010-69	-2.28707	4.17984	7.98458e-08	8.28105e-07	3.58566	4.71013	470	899	2.01812	3.98121	3.4196	6.17953
449826	NM_001005999,NM_001005999_dup1,XM_005165141	ctsll	cathepsin L, like	protein_coding	NP_001005999.1	ZDB-GENE-041010-76	3.30114	-1.23231	0.0131976	0.0374658	0.643394	0.224067	24	6	0.208659	0.047775	0.14526	0.030467
449836	NM_001006006	fra10ac1	FRA10A associated CGG repeat 1	protein_coding	NP_001006006.2	ZDB-GENE-041010-95	2.24938	2.30363	8.23609e-06	5.89618e-05	2.95308	1.9987	288	107	3.13929	1.21463	5.31937	1.88531
449837	NM_001005777,NM_001005777_dup1	apoob	apolipoprotein O, b	protein_coding	NP_001005777.1	ZDB-GENE-041001-40	2.34564	4.06186	4.71754e-08	5.05987e-07	4.60425	3.45171	996	355	10.8727	4.03514	18.4232	6.26324
449937	NM_001020815	gatsl3	GATS protein-like 3	protein_coding	NP_001018651.1	ZDB-GENE-050327-38	-2.05691	1.51951	0.000388468	0.00182096	1.51092	2.26558	79	136	0.533235	0.96219	0.903539	1.49348
449947	NM_001145814	slc16a12b	solute carrier family 16, member 12b	protein_coding	NP_001139286.1	ZDB-GENE-050522-80	-3.65186	4.0848	3.93727e-16	1.04694e-14	3.05008	4.78677	311	950	2.07323	6.60124	3.51298	10.2463
449990	NM_001006011	phlda1	pleckstrin homology-like domain, family A, member 1	protein_coding	NP_001006011.1	ZDB-GENE-041010-103	-9.95779	-1.20332	3.61809e-06	2.80706e-05	0.0979478	0.789181	3	26	0.036576	0.400439	0.061976	0.621551
450001	NM_001006022,XM_005161172	zgc:103482	zgc:103482	protein_coding	NP_001006022.1;XP_005161229.1	ZDB-GENE-041010-115	-35.0598	2.47361	3.93641e-47	4.16053e-45	0.383405	3.55844	13	385	0.13169	4.67304	0.223142	7.25337
450003	NM_001006024	gcdhb	glutaryl-CoA dehydrogenase b	protein_coding	NP_001006024.1	ZDB-GENE-041010-117	5.88201	3.91861	5.20579e-26	2.55229e-24	4.73939	2.42454	1098	156	12.2231	1.8012	20.7114	2.79578
450010	NM_001006031	rdh14a	retinol dehydrogenase 14a (all-trans/9-cis/11-cis)	protein_coding	NP_001006031.1	ZDB-GENE-041010-124	-4.06491	4.49591	4.37593e-19	1.42696e-17	3.30718	5.21648	380	1292	3.68167	13.0348	6.23839	20.2323
450016	NM_001006037	pcyt2	phosphate cytidylyltransferase 2, ethanolamine	protein_coding	NP_001006037.1	ZDB-GENE-041010-132	-3.05203	3.22936	2.09612e-11	3.50738e-10	2.48879	3.91512	197	503	2.18776	5.81628	3.70704	9.02787
450018	NM_001006039,XM_005169164,XM_009305561	samsn1b	SAM domain, SH3 domain and nuclear localisation signals 1b	protein_coding	NP_001006039.2;XP_005169221.1;XP_009303836.1	ZDB-GENE-041010-135	3.04617	5.89361	6.12415e-14	1.32384e-12	6.49833	4.92352	3818	1048	31.6079	7.04654	53.5579	10.9375
450025	NM_001006046,NM_001006046_dup1	cutc	cutC copper transporter homolog (E. coli)	protein_coding	NP_001006046.1	ZDB-GENE-041010-144	-2.65421	3.72837	8.54811e-10	1.1891e-08	3.0419	4.33703	309	686	4.13636	9.58079	4.43966	3.412
450027	NM_001006048,NM_001006048_dup1,XM_021478644	cmss1	cms1 ribosomal small subunit homolog (yeast)	protein_coding	NP_001006048.1;XP_021334319.1	ZDB-GENE-041010-146	2.05579	2.67799	3.01273e-05	0.00018792	3.25152	2.36304	364	148	5.22685	2.24287	5.81937	3.48132
450031	NM_001006052	tmem189	transmembrane protein 189	protein_coding	NP_001006052.1	ZDB-GENE-041010-150	-2.38993	2.0443	3.00048e-06	2.36629e-05	1.77058	2.75889	103	206	1.34955	2.82676	2.28674	4.38762
450053	NM_001006073,NM_001006073_dup1	angptl7	angiopoietin-like 7	protein_coding	NP_001006073.1	ZDB-GENE-041010-175	3.20099	0.6251	5.13558e-06	3.84401e-05	1.69955	0.765611	96	25	0.940079	0.25502	1.31405	0.395836
450064	NM_001006084	zgc:101664	zgc:101664	protein_coding	NP_001006084.1	ZDB-GENE-041010-187	-2.65454	0.449295	0.000162185	0.000845413	0.787362	1.55201	31	69	0.405128	0.938461	0.686468	1.45665
450084	NM_001006104,NM_001006104_dup1,XM_017353549	gss	glutathione synthetase	protein_coding	NP_001006104.1	ZDB-GENE-041010-208	-2.21082	1.35472	0.000157644	0.000826246	1.36116	2.16106	67	124	0.520405	1.00414	0.261158	0.520333
474322	NM_001007054	zgc:92590	zgc:92590	protein_coding	NP_001007055.1	ZDB-GENE-041024-15	-83.4586	3.99648	6.36041e-82	1.8842e-79	0.459082	5.02379	16	1126	0.273147	21.1303	0.462833	32.798
474328	NM_001007058,NM_001007058_dup1	crygm5	crystallin, gamma M5	protein_coding	NP_001007059.1	ZDB-GENE-041024-6	-165.688	9.47698	1.16462e-158	2.44954e-155	3.25506	10.4693	365	50589	5.32193	768.274	9.01774	1192.49
474331	NM_001007061	dolpp1	dolichyldiphosphatase 1	protein_coding	NP_001007062.1	ZDB-GENE-041024-11	-2.5273	2.34311	2.29206e-07	2.2104e-06	1.94742	3.04	122	258	1.40089	3.09108	2.37374	4.79789
492328	NM_001007294	ankrd9	ankyrin repeat domain 9	protein_coding	NP_001007295.1	ZDB-GENE-041114-3	-6.82909	4.00618	2.51446e-30	1.48142e-28	2.34991	4.85816	175	1000	2.30464	13.7491	3.90509	21.3409
492331	NM_001007297,XM_005169359,XM_005169360	ace2	angiotensin I converting enzyme 2	protein_coding	NP_001007298.1;XP_005169416.1;XP_005169417.1	ZDB-GENE-041114-6	-6.87755	2.87083	1.70086e-25	8.18633e-24	1.51092	3.78048	79	455	0.447172	2.8448	0.757708	4.41562
492345	NM_001007311,NM_001007311_dup1,NM_001243173,NM_001243173_dup1,NM_001243174,NM_001243174_dup1,NM_001243176,NM_001243176_dup1	hmgn3	high mobility group nucleosomal binding domain 3	protein_coding	NP_001007312.1;NP_001230102.1;NP_001230103.1;NP_001230105.1	ZDB-GENE-041114-180	-2.04799	6.82045	7.28167e-07	6.4514e-06	6.23145	7.25584	3166	5422	43.3281	72.4048	73.398	111.55
492346	NM_001328202,XM_005173641,XM_005173642	fosb	FBJ murine osteosarcoma viral oncogene homolog B	protein_coding	NP_001315131.1;XP_005173698.1;XP_005173699.1	ZDB-GENE-041114-181	-24.7354	5.70529	7.56988e-75	1.76908e-72	2.33659	6.66222	173	3581	0.370728	8.09677	0.62818	12.5676
492358	NM_001007324,XM_005170175	cx28.9	connexin 28.9	protein_coding	NP_001007325.1;XP_005170232.1	ZDB-GENE-041114-200	-24.2306	1.43903	1.2377e-29	6.96059e-28	0.275901	2.62776	9	185	0.050911	1.22953	0.086266	1.90845
492469	NM_001007341,NM_001007341_dup1,NM_001328589,NM_001328589_dup1	arhgef39	Rho guanine nucleotide exchange factor (GEF) 39	protein_coding	NP_001007342.2;NP_001315518.1	ZDB-GENE-041114-28	-3.81088	-0.863883	0.000877812	0.00372388	0.275901	0.857666	9	29	0.063956	0.222199	0.10837	0.34489
492470	NM_001007342,XM_021470482	spire2	spire-type actin nucleation factor 2	protein_coding	NP_001007343.2;XP_021326157.1	ZDB-GENE-041114-29	2.77019	0.629883	4.63485e-05	0.000278127	1.668	0.835197	93	28	0.512524	0.145155	0.868444	0.225306
492478	NM_001007350	slc25a44a	solute carrier family 25, member 44 a	protein_coding	NP_001007351.1	ZDB-GENE-041114-38	-5.32262	-0.358467	2.86969e-06	2.27423e-05	0.303537	1.17643	10	45	0.116869	0.537795	0.198029	0.834751
492480	NM_001007352,XM_005160065	rnf24	ring finger protein 24	protein_coding	NP_001007353.1;XP_005160122.1	ZDB-GENE-041114-40	-2.12882	5.03181	4.01697e-07	3.72362e-06	4.45205	5.50683	892	1588	2.80003	5.23724	4.74449	8.1291
492484	NM_001007356	cyp2n13	cytochrome P450, family 2, subfamily N, polypeptide 13	protein_coding	NP_001007357.1	ZDB-GENE-041001-158	-2.50949	2.18768	6.38916e-07	5.7233e-06	1.83828	2.90088	110	231	0.995135	2.19058	1.6862	3.40016
492485	NM_001007357,XM_005172993,XM_005172994,XM_005172995,XM_005172996,XM_021480055,XM_021480056,XM_021480057,XM_021480058,XM_021480059,XM_021480060,XM_021480061	lrrc20	leucine rich repeat containing 20	protein_coding	NP_001007358.1;XP_005173050.2;XP_005173051.2;XP_005173052.2;XP_005173053.2;XP_021335730.1;XP_021335731.1;XP_021335732.1;XP_021335733.1;XP_021335734.1;XP_021335735.1;XP_021335736.1	ZDB-GENE-041114-49	-55.2127	8.57428	5.18563e-114	4.36277e-111	3.86376	9.55028	579	26738	11.0457	531.875	18.7164	825.563
492496	NM_001007368,NM_001007368_dup1	nr2e3	nuclear receptor subfamily 2, group E, member 3	protein_coding	NP_001007369.1	ZDB-GENE-041114-63	2.25309	3.69095	3.38364e-07	3.18426e-06	4.2324	3.15332	760	282	5.71942	2.2088	9.69125	3.42844
492515	NM_001007387	ftr72	finTRIM family, member 72	protein_coding	NP_001007388.2	ZDB-GENE-041114-86	2.24202	2.53322	4.86303e-06	3.66085e-05	3.15621	2.17902	338	126	2.93086	1.13396	4.96618	1.76011
492516	NM_001007388	ttc36	tetratricopeptide repeat domain 36	protein_coding	NP_001007389.1	ZDB-GENE-041114-87	-8.13126	1.04634	2.29135e-16	6.21856e-15	0.530986	2.21427	19	130	0.390801	2.88251	0.662191	4.47416
492517	NM_001007389,NM_001007389_dup1,XM_021477514,XM_021477515	zgc:103586	zgc:103586	protein_coding	NP_001007390.1	ZDB-GENE-041114-88	-2.16835	2.68208	6.28115e-06	4.61283e-05	2.32989	3.2835	172	312	0.91599	1.92911	0.50822	2.99431
492518	NM_001007390,XM_005156599	haao	3-hydroxyanthranilate 3,4-dioxygenase	protein_coding	NP_001007391.1;XP_005156656.1	ZDB-GENE-041114-89	-2.7676	2.12357	4.0684e-08	4.40631e-07	1.7202	2.87908	98	227	0.873498	1.37498	1.4801	2.1342
492525	NM_001007397,XM_009291799	tekt1	tektin 1	protein_coding	NP_001007398.1;XP_009290074.1	ZDB-GENE-041114-99	5.10319	3.38223	3.60108e-21	1.38214e-19	4.19416	2.13371	739	121	8.09254	1.37287	13.7124	2.13093
492560	XM_002661876,XM_021475786	im:7141269	im:7141269, transcript variant X2	protein_coding	XP_002661922.1;XP_021331461.1	ZDB-GENE-041111-134	-3.06842	1.02617	1.09716e-06	9.36929e-06	0.988048	2.00877	42	108	0.325577	0.879126	0.551673	1.36456
492576	XM_009302263	mylkb	myosin light chain kinase b	protein_coding	XP_009300538.1	ZDB-GENE-041111-150	-7.6599	-0.231986	1.27337e-08	1.50044e-07	0.247725	1.29642	8	52	0.031931	0.234656	0.054105	0.364226
492579	NM_001309483	efcab6	EF-hand calcium binding domain 6	protein_coding	NP_001296412.1	ZDB-GENE-070828-2	3.9302	0.397111	6.23797e-07	5.60301e-06	1.58035	0.588867	85	18	0.281692	0.05904	0.477313	0.091641
492696	XM_002665221	si:dkey-16j16.4	si:dkey-16j16.4	protein_coding	XP_002665267.1	ZDB-GENE-041111-271	-2.35118	0.458483	0.000899355	0.00379766	0.844921	1.52418	34	67	0.305427	0.642083	0.517531	0.996625
492757	NM_001007398	pacrg	PARK2 co-regulated	protein_coding	NP_001007399.1	ZDB-GENE-041114-100	-4.72858	1.07892	3.70549e-11	6.06046e-10	0.787362	2.152	31	123	0.496663	2.09413	0.841569	3.25046
492764	NM_001007405	rbm41	RNA binding motif protein 41	protein_coding	NP_001007406.1	ZDB-GENE-041114-107	-4.38389	1.95469	9.2258e-14	1.96801e-12	1.28002	2.86251	61	224	0.414174	1.60375	0.701796	2.4893
492780	NM_001007421,XM_009296976,XM_009296977	bin2a	bridging integrator 2a	protein_coding	NP_001007422.1;XP_009295251.1;XP_009295252.1	ZDB-GENE-041114-126	-2.82625	1.89078	7.67615e-08	7.99665e-07	1.54605	2.68542	82	194	0.616494	1.52893	1.04462	2.37316
492801	NM_001007442	pmpca	peptidase (mitochondrial processing) alpha	protein_coding	NP_001007443.1	ZDB-GENE-030131-5809	-2.34313	4.65556	1.94092e-08	2.19835e-07	4.00512	5.18128	643	1260	4.48679	9.16215	7.60263	14.2212
492802	NM_001007443	rhoua	ras homolog family member Ua	protein_coding	NP_001007444.1	ZDB-GENE-040618-3	-3.81814	3.7441	1.78768e-16	4.87683e-15	2.71144	4.4724	237	757	1.70918	5.70045	2.89612	8.84808
493589	NM_001009588	pcdh2ab1	protocadherin 2 alpha b 1	protein_coding	NP_001009588.1	ZDB-GENE-041118-1	2.36063	-0.134046	0.00525818	0.0173483	1.13373	0.588867	51	18	0.233896	0.085792	0.396325	0.133164
493592	NM_001009593	pcdh2ab6	protocadherin 2 alpha b 6	protein_coding	NP_001009593.1	ZDB-GENE-041118-5	3.68645	-1.61611	0.0231566	0.0596439	0.507414	0.153175	18	4	0.323144	0.058474	0.54755	0.090761
493596	NM_001009585	pcdh2aa1	protocadherin 2 alpha a 1	protein_coding	NP_001009585.1	ZDB-GENE-041118-13	-5.23725	-1.56131	0.00148807	0.00587469	0.129173	0.588867	4	18	0.016524	0.083471	0.027999	0.129562
493610	NM_001007770,NM_001007770_dup1,NM_001007770_dup2,NM_001007770_dup3	med28	mediator complex subunit 28	protein_coding	NP_001007771.1	ZDB-GENE-041121-4	-2.05827	2.9315	1.58961e-05	0.000106197	2.57636	3.48817	212	365	3.6622	6.54594	3.85543	1.57462
493617	NM_001007777,NM_001007777_dup1	eif4eb	eukaryotic translation initiation factor 4eb	protein_coding	NP_001007778.1	ZDB-GENE-041121-14	-2.0679	3.28333	7.82994e-06	5.62915e-05	2.87234	3.81534	270	467	2.70395	4.88001	4.5817	7.57462
493628	NM_001007783	crygm2c	crystallin, gamma M2c	protein_coding	NP_001007784.1	ZDB-GENE-050516-11	-151.515	10.9439	2.96136e-160	8.355e-157	4.7457	11.9348	1103	139764	29.0918	3840.11	49.2946	5960.52
493629	NM_001007784	crygn1	crystallin, gamma N1	protein_coding	NP_001007785.1	ZDB-GENE-050225-1	-19.4699	10.2483	7.11045e-75	1.68038e-72	6.90496	11.1767	5075	82627	93.134	1578.94	157.811	2450.79
493781	NM_001013274,XM_005164742	hgfa	hepatocyte growth factor a	protein_coding	NP_001013292.1;XP_005164799.1	ZDB-GENE-041014-2	5.95639	1.44121	1.52482e-14	3.48984e-13	2.46451	0.812372	193	27	0.666254	0.096057	1.12893	0.149097
494041	NM_001008584,NM_001008584_dup1	slc7a2	solute carrier family 7 (cationic amino acid transporter, y+ system), member 2	protein_coding	NP_001008584.1	ZDB-GENE-041212-5	-4.26768	0.96048	1.02099e-09	1.40357e-08	0.787362	2.03858	31	111	0.151876	0.57523	0.257345	0.892856
494042	NM_001008585,NM_001008585_dup1,XM_009305270	slc43a2b	solute carrier family 43 (amino acid system L transporter), member 2b	protein_coding	NP_001008585.1;XP_009303545.1	ZDB-GENE-041212-6	2.76352	5.60312	7.76266e-12	1.3755e-10	6.17553	4.74369	3044	921	14.2717	4.75696	17.0477	4.50963
494046	NM_001008589,XM_005160520,XM_005160521,XM_005160522,XM_009294660,XM_017352471	anapc4	anaphase promoting complex subunit 4	protein_coding	NP_001008589.1;XP_005160577.1;XP_005160578.1;XP_005160579.1;XP_009292935.1;XP_017207960.1	ZDB-GENE-041212-10	2.3673	4.37639	2.11548e-08	2.38963e-07	4.91202	3.73266	1243	439	6.97448	2.55773	11.8179	3.97004
494048	NM_001008591	tspan5b	tetraspanin 5b	protein_coding	NP_001008591.1	ZDB-GENE-041212-12	-3.18352	1.42204	3.77662e-08	4.12214e-07	1.17919	2.33128	54	144	0.399212	1.118	0.676444	1.73532
494049	NM_001008592,XM_005170238,XM_021469794	zgc:101853	zgc:101853	protein_coding	NP_001008592.1;XP_005170295.1;XP_021325469.1	ZDB-GENE-041212-13	2.72994	0.0101553	0.000811266	0.00348303	1.25192	0.588867	59	18	0.772537	0.240794	1.30902	0.373755
494064	NM_001008607	hsdl1	hydroxysteroid dehydrogenase like 1	protein_coding	NP_001008607.1	ZDB-GENE-041212-31	-4.31853	3.75933	4.90722e-19	1.59526e-17	2.60441	4.52072	217	784	2.13282	8.04194	3.61396	12.4825
494075	NM_001008618,XM_005171844	oclnb	occludin b	protein_coding	NP_001008618.1;XP_005171901.1	ZDB-GENE-041212-43	-2.41181	4.02973	1.63087e-08	1.8775e-07	3.39972	4.58778	408	823	2.59704	5.45212	4.40055	8.46262
494079	NM_001008622,NM_001008622_dup1,XM_021476855	iqcb1	IQ motif containing B1	protein_coding	NP_001008622.1	ZDB-GENE-041212-47	2.91511	2.81491	6.80162e-10	9.53723e-09	3.50761	2.18791	443	127	2.73907	0.788396	2.74089	1.22373
494090	NM_001008633,XM_005163493,XM_009298615	bfsp2	beaded filament structural protein 2, phakinin	protein_coding	NP_001008633.1;XP_005163550.1;XP_009296890.1	ZDB-GENE-041212-58	-253.515	11.2812	6.26568e-180	6.5893e-176	4.36127	12.2758	835	177040	6.93638	1642.55	11.7533	2549.52
494093	NM_001008636,XM_005162693	spice1	spindle and centriole associated protein 1	protein_coding	NP_001008636.1;XP_005162750.1	ZDB-GENE-041212-64	6.55537	2.84375	1.18306e-23	5.0886e-22	3.73521	1.52418	526	67	2.92082	0.386744	4.94917	0.600294
494109	NM_001008652	ch25h	cholesterol 25-hydroxylase	protein_coding	NP_001008652.1	ZDB-GENE-041212-81	3.35239	2.2164	1.45052e-10	2.21882e-09	3.0087	1.63239	301	75	4.16253	1.08067	7.05319	1.67738
494158	NM_181760,XM_005165606	anxa1c	annexin A1c	protein_coding	NP_861425.1;XP_005165663.1	ZDB-GENE-030131-5274	-2.83018	5.73385	2.13326e-12	4.00972e-11	4.8466	6.31481	1186	2807	14.7177	36.27	24.9384	56.2973
494164	NM_001009901,XM_005163149	tnni2a.4	troponin I type 2a (skeletal, fast), tandem duplicate 4	protein_coding	NP_001009901.2;XP_005163206.1	ZDB-GENE-040625-119	51.1617	5.1974	4.55471e-89	1.62371e-86	6.18578	1.26314	3066	50	57.1904	0.965028	96.9061	1.49789
494168	NM_001009904,XM_021480569	six1a	SIX homeobox 1a	protein_coding	NP_001009904.1;XP_021336244.1	ZDB-GENE-040718-155	-2.45823	0.460247	0.000483906	0.00221357	0.825989	1.53816	33	68	0.282184	0.580717	0.478146	0.901373
494477	NM_001009917,XM_005163666	tfr1a	transferrin receptor 1a	protein_coding	NP_001009917.1;XP_005163723.1	ZDB-GENE-041220-1	-2.55999	3.14911	1.47289e-08	1.71346e-07	2.57636	3.77754	212	454	0.404041	0.903922	0.684626	1.40304
494479	NM_001256207	perp	PERP, TP53 apoptosis effector	protein_coding	NP_001243136.1	ZDB-GENE-050104-1	-2.14144	7.89041	1.24816e-07	1.2561e-06	7.24828	8.34181	6450	11550	30.0334	56.004	50.89	86.9279
494481	NR_036645,NR_036645_dup1	rpph1	ribonuclease P RNA component H1	RNase_P_RNA	.	ZDB-GENE-041229-3	-12.4449	2.86276	1.29827e-36	9.48145e-35	1.05462	3.85217	46	480	2.32037	25.2672	3.93174	39.2191
494487	NM_205729	nr1d1	nuclear receptor subfamily 1, group d, member 1	protein_coding	NP_991292.2	ZDB-GENE-050105-1	4.02526	4.89266	2.95799e-19	9.75163e-18	5.59889	3.67689	2027	421	10.6142	2.29155	17.9851	3.55689
494572	NM_001011660,NM_001011660_dup1	guca1g	guanylate cyclase activator 1g	protein_coding	NP_001011660.1	ZDB-GENE-050120-1	4.54744	0.958435	7.90025e-10	1.10263e-08	2.02417	0.741649	131	24	3.57094	0.673287	1.25549	1.04506
497073	NM_001012253	xkr7	XK, Kell blood group complex subunit-related family, member 7	protein_coding	NP_001012253.2	ZDB-GENE-051113-336	-2.16416	1.37585	0.000177751	0.000917457	1.38722	2.17007	69	125	0.463771	0.879326	0.785835	1.36487
497127	NM_001024099	pcdh1a4	protocadherin 1 alpha 4	protein_coding	NP_001019270.1	ZDB-GENE-050202-4	2.99098	0.758394	1.14761e-05	7.91408e-05	1.78045	0.857666	104	29	0.297833	0.0864	0.504662	0.134107
497129	NM_001024101	pcdh1a6	protocadherin 1 alpha 6	protein_coding	NP_001019272.1	ZDB-GENE-050203-2	2.01884	5.84791	1.59011e-06	1.31517e-05	6.28442	5.28957	3286	1361	9.60487	4.14074	16.2749	6.42714
497183	NM_001020525	grhpra	glyoxylate reductase/hydroxypyruvate reductase a	protein_coding	NP_001018361.1	ZDB-GENE-040724-230	2.02885	2.98421	2.17228e-05	0.000140238	3.52533	2.62776	449	185	5.09129	2.18321	8.62692	3.38871
497562	NM_001256210	pnkd	paroxysmal nonkinesigenic dyskinesia	protein_coding	NP_001243139.1	ZDB-GENE-050208-278	-2.14387	2.52182	1.30528e-05	8.90784e-05	2.21088	3.13504	155	278	1.63561	3.0511	2.77146	4.73583
497615	NM_001012374,XM_005155462,XM_009297433	fut10	fucosyltransferase 10	protein_coding	NP_001012374.1;XP_005155519.1;XP_009295708.1	ZDB-GENE-081022-183	-2.19392	-0.0335794	0.00564883	0.0184033	0.664862	1.19419	25	46	0.203739	0.388561	0.345226	0.603114
497645	NM_001012385,XM_005156825,XM_005156826,XM_005156827	matn3b	matrilin 3b	protein_coding	NP_001012385.1;XP_005156882.1;XP_005156883.1;XP_005156884.1	ZDB-GENE-050221-9	2.82223	0.918489	1.1687e-05	8.04097e-05	1.88476	0.965043	115	34	1.17182	0.403679	1.98559	0.62658
503502	NM_001012483,NM_001320394	crabp2b	cellular retinoic acid binding protein 2, b	protein_coding	NP_001012501.2;NP_001307323.1	ZDB-GENE-050208-52	2.18475	5.17036	1.59558e-07	1.56691e-06	5.65293	4.55893	2106	806	12.6182	5.03256	21.3809	7.8114
503514	NM_001126478,XM_005167165,XM_005167166	angptl2b	angiopoietin-like 2b	protein_coding	NP_001119950.1;XP_005167222.1;XP_005167223.1	ZDB-GENE-050624-1	3.0493	2.47895	9.47709e-10	1.30795e-08	3.2156	1.89389	354	97	1.3773	0.385483	2.33375	0.598337
503521	NM_001012486,NM_001012486_dup1,XM_009306437,XM_009306438,XM_009306439,XM_009306440	pcdh15b	protocadherin-related 15b	protein_coding	NP_001012504.1;XP_009304712.1;XP_009304713.1;XP_009304714.1;XP_009304715.1	ZDB-GENE-050214-1	2.47379	3.43578	2.45703e-08	2.74741e-07	4.02808	2.84575	654	221	1.74056	0.735222	2.69885	1.07637
503533	NM_001012497	slc50a1	solute carrier family 50 (sugar efflux transporter), member 1	protein_coding	NP_001012515.1	ZDB-GENE-050220-11	-3.03072	0.834109	2.87327e-06	2.27622e-05	0.900271	1.8609	37	94	0.284169	0.764195	0.48151	1.18616
503536	NM_001012500,XM_005174189	rbbp8	retinoblastoma binding protein 8	protein_coding	NP_001012518.1;XP_005174246.1	ZDB-GENE-050220-14	2.02697	3.22484	1.62834e-05	0.000108417	3.74784	2.83447	531	219	3.39593	1.4429	5.75422	2.23962
503537	NM_001012501,NM_001012501_dup1	slc29a2	solute carrier family 29 (equilibrative nucleoside transporter), member 2	protein_coding	NP_001012519.2	ZDB-GENE-050220-15	-3.82256	0.966672	1.1894e-08	1.4078e-07	0.844921	2.01877	34	109	0.247324	0.83366	0.419078	1.29398
503564	NM_001012616	drd4a	dopamine receptor D4a	protein_coding	NP_001012634.2	ZDB-GENE-070112-996	3.25328	4.862	1.47326e-14	3.3755e-13	5.50381	3.87162	1895	487	10.7871	2.88639	18.2781	4.48017
503571	NM_001012656,NM_001012656_dup1	pcdh1gc5	protocadherin 1 gamma c 5	protein_coding	NP_001012674.2	ZDB-GENE-041118-16	2.84862	6.019	1.3795e-12	2.64254e-11	6.59829	5.11521	4095	1202	14.5829	4.45494	3.94441	3.50507
503572	NM_001012657,NM_001012657_dup1	pcdh1gc6	protocadherin 1 gamma c 6	protein_coding	NP_001012675.2	ZDB-GENE-041118-17	-2.29489	5.23747	2.35351e-08	2.63726e-07	4.57761	5.74165	977	1875	3.49881	6.99102	3.02615	2.86971
503573	NM_001012658,NM_001012658_dup1	pcdh1gb2	protocadherin 1 gamma b 2	protein_coding	NP_001012676.2	ZDB-GENE-041118-19	-4.41678	3.23503	3.99961e-18	1.2353e-16	2.15887	4.02839	148	547	0.527471	2.03558	0.893773	3.15957
503586	NM_001013275,NM_001013275_dup1	crygs4	crystallin, gamma S4	protein_coding	NP_001013293.1	ZDB-GENE-050223-2	-44.5878	10.9351	1.7511e-108	1.2277e-105	6.44116	11.9035	3668	136764	94.8391	3682.42	160.7	5715.76
503596	NM_001013284	mif4gdb	MIF4G domain containing b	protein_coding	NP_001013302.1	ZDB-GENE-050227-7	-2.2165	1.53632	9.06217e-05	0.00050855	1.47491	2.30699	76	141	0.861514	1.67351	1.45979	2.59758
503597	NM_001013285	zgc:110821	zgc:110821	protein_coding	NP_001013303.1	ZDB-GENE-050227-8	2.00135	1.7948	0.000340107	0.00162505	2.47062	1.70854	194	81	3.06459	1.33545	5.19278	2.07286
503603	NM_001013290,XM_017351632	dph6	diphthamine biosynthesis 6	protein_coding	NP_001013308.2;XP_017207121.2	ZDB-GENE-050227-15	-2.52903	3.56702	7.03255e-09	8.69581e-08	2.94433	4.16528	286	605	2.73374	5.74224	4.63217	8.91296
503605	NM_001013292	supt7l	SPT7-like STAGA complex gamma subunit	protein_coding	NP_001013310.1	ZDB-GENE-050227-17	-2.38423	0.0450533	0.00206394	0.00774543	0.664862	1.26314	25	50	0.263168	0.554512	0.445925	0.860699
503733	XM_021468237,XM_021468238,XM_021468239,XM_021468240	snx13	sorting nexin 13, transcript variant X3	protein_coding	XP_021323912.1;XP_021323913.1;XP_021323914.1;XP_021323915.1	ZDB-GENE-050306-12	-2.47313	3.15379	4.10615e-08	4.44034e-07	2.60995	3.76867	218	451	0.891468	1.97697	1.51054	3.0686
503736	NM_001013314	apobec2a	apolipoprotein B mRNA editing enzyme, catalytic polypeptide-like 2a	protein_coding	NP_001013332.1	ZDB-GENE-050306-15	3.13201	-0.769924	0.00360939	0.0125357	0.844921	0.324272	34	9	0.382931	0.106458	0.648856	0.16524
503737	NM_001013315,NM_001013315_dup1,NM_001013315_dup2,XM_005171846,XM_021476138	dpp7	dipeptidyl-peptidase 7	protein_coding	NP_001013333.1	ZDB-GENE-050306-16	-2.17044	5.39171	1.53961e-07	1.5196e-06	4.7793	5.86877	1130	2051	9.26475	17.4158	9.08614	14.832
503753	NM_001013331,XM_005164512,XM_005164513	zgc:113263	zgc:113263	protein_coding	NP_001013349.2;XP_005164569.1;XP_005164570.1	ZDB-GENE-050306-34	2.14868	4.12063	7.71858e-07	6.81263e-06	4.62356	3.58561	1010	393	3.23974	1.29366	5.48956	2.00798
503754	XM_009299139	zgc:113102	zgc:113102	protein_coding	XP_009297414.1	ZDB-GENE-050306-35	6.29756	1.40109	7.97444e-15	1.89736e-13	2.43982	0.765611	189	25	1.3015	0.179456	2.20532	0.278547
503756	NM_001013334	gpm6bb	glycoprotein M6Bb	protein_coding	NP_001013352.1	ZDB-GENE-030710-10	-2.15778	2.51885	1.09991e-05	7.62252e-05	2.20357	3.13504	154	278	2.07832	3.90722	3.5216	6.06469
503757	NM_001013335,NM_001013335_dup1	zgc:110789	zgc:110789	protein_coding	NP_001013353.1	ZDB-GENE-050306-38	-3.08451	1.93049	5.25278e-09	6.60381e-08	1.51092	2.7469	79	204	0.524704	1.42099	0.889084	2.20563
503770	XR_002458419	zgc:113096	zgc:113096	misc_RNA	.	ZDB-GENE-050306-54	-2.58012	1.25366	9.40606e-06	6.64225e-05	1.20872	2.13371	56	121	0.179366	0.402198	0.303926	0.624281
503774	NM_001013352	tp53i11a	tumor protein p53 inducible protein 11a	protein_coding	NP_001013370.1	ZDB-GENE-050306-58	-2.38423	0.0450533	0.00206394	0.00774543	0.664862	1.26314	25	50	0.190712	0.401902	0.323151	0.623822
503792	NM_001302253	gpc2	glypican 2	protein_coding	NP_001289182.1	ZDB-GENE-050302-31	3.22507	1.62849	1.84459e-08	2.10397e-07	2.48879	1.27988	197	51	1.9358	0.513777	3.28011	0.797471
503869	NM_001044764,NM_001044764_dup1,XM_005161175	btc	betacellulin, epidermal growth factor family member	protein_coding	NP_001038229.2;XP_005161232.1	ZDB-GENE-050311-1	-2.30591	-0.593388	0.0124967	0.0358	0.459082	0.90158	16	31	0.239201	0.407281	0.159495	0.385233
503923	XM_021479675	si:ch211-159e12.5	si:ch211-159e12.5	protein_coding	XP_021335350.1	ZDB-GENE-050309-53	-54.5921	4.90852	7.62139e-89	2.67168e-86	1.05462	5.9063	46	2106	0.174543	8.39292	0.295753	13.0273
504039	XM_002667777	im:7150988	im:7150988	protein_coding	XP_002667823.1	ZDB-GENE-050309-169	9.18624	0.298108	1.69492e-11	2.87493e-10	1.62484	0.291637	89	8	1.36366	0.116816	2.31066	0.181319
504168	NR_138544	si:ch211-92l17.1	si:ch211-92l17.1	lncRNA	.	ZDB-GENE-041210-113	2.81358	0.433484	0.000102124	0.000564219	1.53443	0.741649	81	24	1.01338	0.3063	1.71711	0.47543
541314	NM_001131052	ghrhra	growth hormone releasing hormone receptor a	protein_coding	NP_001124524.1	ZDB-GENE-050315-2	-2.49215	4.48276	2.29585e-09	3.02181e-08	3.78508	5.03862	546	1138	4.87519	10.5897	8.26075	16.4371
541317	NM_001013446,NM_001013446_dup1,NM_001013446_dup2	gatb	glutamyl-tRNA(Gln) amidotransferase, subunit B	protein_coding	NP_001013464.2	ZDB-GENE-040724-131	-2.42792	2.69093	2.64226e-07	2.52842e-06	2.24691	3.33645	160	325	1.163	2.46348	1.71006	1.21092
541320	NM_001013448,NM_001013448_dup1,XM_009291986	itga6b	integrin, alpha 6b	protein_coding	NP_001013466.1	ZDB-GENE-050320-5	-2.32321	6.185	8.03759e-09	9.80595e-08	5.48432	6.68203	1869	3631	6.72037	13.6079	6.95769	12.169
541345	NM_001013472,NM_001013472_dup1,NM_001013472_dup2	zgc:110340	zgc:110340	protein_coding	NP_001013490.1	ZDB-GENE-050320-36	2.36111	4.86802	1.26305e-08	1.48972e-07	5.38999	4.19647	1748	619	26.9368	9.88479	26.7185	15.3429
541358	NM_001013485	zgc:110782	zgc:110782	protein_coding	NP_001013503.1	ZDB-GENE-050320-51	-2.03735	1.91573	0.000155362	0.000815914	1.79025	2.588	105	179	1.43402	2.54509	2.42988	3.95043
541359	NM_001013486	zgc:113531	zgc:113531	protein_coding	NP_001013504.1	ZDB-GENE-050320-52	-2.27782	1.07813	0.000207706	0.00105295	1.17919	1.95768	54	103	0.735472	1.48364	1.24622	2.30286
541361	NM_001013488,XM_021476864	ccdc174	coiled-coil domain containing 174	protein_coding	NP_001013506.1;XP_021332539.1	ZDB-GENE-050320-54	-2.2794	5.26711	2.74605e-08	3.05273e-07	4.61256	5.76784	1002	1910	9.59244	19.0517	16.2539	29.5715
541363	NM_001013490,XM_005157733,XM_009291646,XM_009291647	zgc:113149	zgc:113149	protein_coding	NP_001013508.1;XP_005157790.1;XP_009289921.1;XP_009289922.1	ZDB-GENE-050320-56	2.07258	4.831	1.23175e-06	1.04171e-05	5.29681	4.2841	1636	660	10.7796	4.9974	18.2655	7.75683
541368	NM_001013495	s100t	S100 calcium binding protein T	protein_coding	NP_001013513.1	ZDB-GENE-050320-61	3.18193	1.79539	1.09348e-08	1.30454e-07	2.62646	1.39188	221	58	4.72614	1.29632	8.00819	2.01211
541381	NM_001013508	gnb1l	guanine nucleotide binding protein (G protein), beta polypeptide 1-like	protein_coding	NP_001013526.1	ZDB-GENE-050320-77	7.21308	1.77625	7.84865e-19	2.51264e-17	2.7819	0.857666	251	29	3.02987	0.35465	5.13395	0.550479
541384	NM_001013511,XM_017353828,XM_021470159,XM_021470160,XM_021470161,XM_021470162	mybpc2b	myosin binding protein C, fast type b	protein_coding	NP_001013529.2;XP_017209317.1;XP_021325834.1;XP_021325835.1;XP_021325836.1;XP_021325837.1	ZDB-GENE-050320-80	11.5566	0.586546	1.0652e-14	2.49492e-13	1.85705	0.291637	112	8	0.434674	0.028538	0.736531	0.044297
541385	NM_001013512,NM_001013512_dup1	tmem86a	transmembrane protein 86A	protein_coding	NP_001013530.1	ZDB-GENE-050320-81	-7.0998	0.112436	4.1753e-10	6.03568e-09	0.330654	1.51007	11	66	0.109876	0.722028	0.18618	1.12071
541391	NM_001013518,XM_005163497,XM_009298617	faim2a	Fas apoptotic inhibitory molecule 2a	protein_coding	NP_001013536.1;XP_005163554.1;XP_009296892.1	ZDB-GENE-050320-88	-3.7217	0.447161	6.87178e-07	6.11655e-06	0.643394	1.63239	24	75	0.291857	0.974099	0.494536	1.51197
541395	NM_001013522,XM_005169763	lim2.5	lens intrinsic membrane protein 2.5	protein_coding	NP_001013540.1;XP_005169820.1	ZDB-GENE-050320-94	-20.9523	7.92439	7.01608e-76	1.6962e-73	4.53161	8.86019	945	16559	14.1024	259.396	23.8959	402.627
541397	NM_001013524,NM_001013524_dup1,NM_001013524_dup2,XM_021479171,XM_021479172	cnih2	cornichon family AMPA receptor auxiliary protein 2	protein_coding	NP_001013542.1;XP_021334846.1;XP_021334847.1	ZDB-GENE-050320-96	4.32477	-0.428953	3.24692e-05	0.000201097	1.07079	0.324272	47	9	0.280634	0.048234	0.323156	0.049952
541399	NM_001013526	c6ast3	six-cysteine containing astacin protease 3	protein_coding	NP_001013544.1	ZDB-GENE-050320-99	-31.8991	2.95676	4.57095e-53	5.79161e-51	0.554179	4.00342	20	537	0.330946	9.52457	0.560771	14.7838
541403	NM_001013530,XM_005168624	tmem248	transmembrane protein 248	protein_coding	NP_001013548.1;XP_005168681.1	ZDB-GENE-050320-103	-4.37817	4.26559	1.99945e-20	7.28846e-19	3.0254	5.01257	305	1117	1.15658	4.50252	1.95976	6.98869
541404	NM_001013531,XM_005165305,XM_005165306,XM_021476142,XR_002458748	cdc42ep2	CDC42 effector protein (Rho GTPase binding) 2	protein_coding	NP_001013549.1;XP_005165362.1;XP_005165363.1;XP_021331817.1	ZDB-GENE-050320-104	-2.45286	4.5634	3.91961e-09	4.98736e-08	3.87532	5.11054	584	1198	1.15465	2.80178	1.9565	4.34884
541415	NM_001013542,XM_009302727	zgc:101577	zgc:101577	protein_coding	NP_001013560.1;XP_009301002.1	ZDB-GENE-050320-117	-2.40771	4.13015	1.38694e-08	1.62244e-07	3.49269	4.68365	438	882	2.43926	5.1672	4.13321	8.02039
541418	NM_001013545,NM_001013545_dup1	zgc:101564	zgc:101564	protein_coding	NP_001013563.2	ZDB-GENE-050320-120	-69.5858	3.82445	2.50887e-77	6.28203e-75	0.48345	4.85397	17	997	0.179194	10.9822	0.303634	17.0462
541419	NM_001013546,XM_005160685,XM_021468416	cx23	connexin 23	protein_coding	NP_001013564.1;XP_005160742.1;XP_021324091.1	ZDB-GENE-050320-121	-9.20706	1.99107	2.50054e-24	1.13105e-22	0.825989	3.02519	33	255	0.284035	2.36634	0.481283	3.67298
541428	NM_001013554,XM_005170031	znrd1	zinc ribbon domain containing 1	protein_coding	NP_001013572.1;XP_005170088.1	ZDB-GENE-050320-131	-2.12431	1.73591	9.77812e-05	0.000543364	1.63575	2.45433	90	160	2.17462	4.05651	3.68477	6.29641
541448	NM_001013573,XM_021481013,XM_021481015,XM_021481016	acrc	acidic repeat containing	protein_coding	NP_001013591.1;XP_021336688.1;XP_021336690.1;XP_021336691.1	ZDB-GENE-050320-153	2.36492	0.818217	0.000302024	0.00146471	1.76065	1.00585	102	36	0.681056	0.246212	1.15401	0.382163
541449	NM_001013574,NM_001013574_dup1	zgc:113516	zgc:113516	protein_coding	NP_001013592.1	ZDB-GENE-050320-154	-5.4537	1.33662	1.06618e-13	2.2568e-12	0.825989	2.38641	33	151	0.652106	3.13464	0.614787	4.85285
541475	NM_001172627,NM_001172627_dup1,XM_021477524	itga11a	integrin, alpha 11a	protein_coding	NP_001166098.1;XP_021333199.1	ZDB-GENE-050324-1	-2.74434	4.08366	9.90099e-11	1.54601e-09	3.32752	4.68992	386	886	1.20797	2.90735	1.64371	4.27664
541487	NM_001014300	plcxd3	phosphatidylinositol-specific phospholipase C, X domain containing 3	protein_coding	NP_001014322.1	ZDB-GENE-050327-10	2.9754	4.31413	2.60528e-12	4.8665e-11	4.9387	3.4554	1267	356	8.44773	2.46881	14.3142	3.83202
541493	NM_001014306	lifra	leukemia inhibitory factor receptor alpha a	protein_coding	NP_001014328.2	ZDB-GENE-050327-16	-4.92517	1.08019	1.35549e-11	2.31788e-10	0.767654	2.16106	30	124	0.112453	0.491273	0.190545	0.76254
541495	NM_001326378,XM_005163498,XM_009298618	ccdc24	coiled-coil domain containing 24	protein_coding	NP_001313307.1;XP_005163555.1;XP_009296893.1	ZDB-GENE-050327-18	103	5.40897	2.26059e-106	1.48584e-103	6.40892	0.857666	3586	29	29.458	0.240086	49.915	0.372655
541497	NM_001014310,XM_021468818	slc47a1	solute carrier family 47 (multidrug and toxin extrusion), member 1	protein_coding	NP_001014332.2;XP_021324493.1	ZDB-GENE-050327-20	-5.73574	1.56036	2.47493e-15	6.11695e-14	0.900271	2.58126	37	178	0.2305	1.16255	0.39057	1.80447
541498	XM_017354851,XM_017354852,XM_021474766	zgc:113265	zgc:113265, transcript variant X2	protein_coding	XP_017210340.1;XP_017210341.1;XP_021330441.1	ZDB-GENE-050327-21	-7.78233	1.63987	9.16637e-20	3.18145e-18	0.767654	2.69793	30	196	0.063594	0.432465	0.107757	0.671261
541505	NM_001007171,XM_005156835,XM_009307316	cep68	centrosomal protein 68	protein_coding	NP_001007172.1;XP_005156892.1;XP_009305591.1	ZDB-GENE-030616-565	2.81865	2.67427	3.80251e-09	4.85894e-08	3.36735	2.10582	398	118	1.47475	0.452419	2.49888	0.702232
541506	NM_001014319	zgc:113227	zgc:113227	protein_coding	NP_001014341.1	ZDB-GENE-050327-32	3.11619	0.481723	2.26777e-05	0.000145598	1.5916	0.717283	86	23	0.826021	0.223858	1.39965	0.347467
541508	NM_001014321,XM_021467645	zgc:113340	zgc:113340	protein_coding	NP_001014343.2;XP_021323320.1	ZDB-GENE-050327-34	3.18974	-1.07321	0.00841274	0.0257824	0.706862	0.258248	27	7	0.358324	0.090747	0.60716	0.140855
541525	NM_001014338,XM_005170176,XM_009294917	smpdl3a	sphingomyelin phosphodiesterase, acid-like 3A	protein_coding	NP_001014360.1;XP_005170233.1;XP_009293192.1	ZDB-GENE-050327-61	-2.83676	0.423509	6.29184e-05	0.000366278	0.747673	1.55201	29	69	0.2565	0.631053	0.434626	0.979504
541535	NM_001014349,XM_005171289	golim4b	golgi integral membrane protein 4b	protein_coding	NP_001014371.2;XP_005171346.1	ZDB-GENE-050327-74	4.23118	0.987149	2.35168e-09	3.07988e-08	2.03245	0.789181	132	26	0.8198	0.167052	1.38911	0.259294
541539	NM_001014353,XM_009296531	alpi.1	alkaline phosphatase, intestinal, tandem duplicate 1	protein_coding	NP_001014375.1;XP_009294806.1	ZDB-GENE-050327-78	3.94253	1.93219	7.13502e-12	1.27179e-10	2.80142	1.32895	255	54	2.10656	0.473944	3.56946	0.735642
541542	NM_001014356,XM_017351920	fam219b	family with sequence similarity 219, member B	protein_coding	NP_001014378.1;XP_017207409.1	ZDB-GENE-050327-82	-2.99665	1.16036	6.70608e-07	5.97665e-06	1.07079	2.10582	47	118	0.427209	1.0413	0.723884	1.61628
541552	NM_001282173,NM_001282173_dup1,XM_005162314,XM_005162316,XM_005162321,XM_009296986,XM_021469796,XM_021469797,XM_021469798,XM_021469799,XM_021469800,XM_021469801	eya4	EYA transcriptional coactivator and phosphatase 4	protein_coding	NP_001269102.1	ZDB-GENE-050327-93	2.18491	1.56841	0.000127374	0.000686936	2.31639	1.49581	170	65	0.872752	0.348463	1.19216	0.37595
544665	NM_001014827,NM_001014827_dup1	stc2a	stanniocalcin 2a	protein_coding	NP_001014827.1	ZDB-GENE-041008-14	2.10747	3.77475	2.33336e-06	1.88036e-05	4.28361	3.28764	789	313	14.3403	5.90932	22.2128	3.26495
544667	NM_001014829,NM_001014829_dup1,NM_001257153,NM_001257153_dup1	flt1	fms-related tyrosine kinase 1 (vascular endothelial growth factor/vascular permeability factor receptor)	protein_coding	NP_001014829.3;NP_001244082.1	ZDB-GENE-050407-1	2.19694	0.821104	0.000868341	0.00368817	1.74057	1.04554	100	38	0.478367	0.205231	0.809945	0.317834
548336	NM_001017540	ak5l	adenylate kinase 5, like	protein_coding	NP_001017540.1	ZDB-GENE-050410-2	2.42514	0.679724	0.000362155	0.00171683	1.668	0.923046	93	32	0.882075	0.312867	1.49463	0.485623
548337	NM_001017541,NM_001017541_dup1	hsh2d	hematopoietic SH2 domain containing	protein_coding	NP_001017541.2	ZDB-GENE-050410-3	-3.58062	1.44105	2.32025e-09	3.0463e-08	1.11825	2.37866	50	150	0.349823	1.10665	0.592757	1.71772
548339	NM_001017543,NM_001017543_dup1,XM_009291027,XM_009291029,XM_009291030,XM_021481017	zgc:113364	zgc:113364	protein_coding	NP_001017543.1;XP_009289302.1;XP_009289304.1;XP_009289305.1;XP_021336692.1	ZDB-GENE-050410-5	-3.02889	1.36874	1.44682e-07	1.4361e-06	1.17919	2.27396	54	137	0.713432	1.48921	1.17548	2.31151
548602	NM_001015062	myoc	myocilin	protein_coding	NP_001015062.1	ZDB-GENE-050425-2	2.14935	3.64432	1.59001e-06	1.31517e-05	4.16809	3.15332	725	282	4.4967	1.81896	7.61942	2.82335
548606	NM_001015065,NM_001015065_dup1,NM_001015065_dup2,XM_009298003,XM_009298005,XM_009298006,XM_021470486,XM_021470487	erc1a	ELKS/RAB6-interacting/CAST family member 1a	protein_coding	NP_001015065.1	ZDB-GENE-091214-5	2.06827	3.89208	3.21959e-06	2.52678e-05	4.38733	3.41051	851	344	3.43887	1.43469	4.63616	1.78155
550165	XM_002663531,XM_021479338	ponzr2	plac8 onzin related protein 2	protein_coding	XP_021335013.1	ZDB-GENE-050411-41	6.52522	0.640721	2.04668e-11	3.43833e-10	1.83828	0.477211	110	14	1.55042	0.205206	2.6271	0.318515
550225	NM_001017563,NM_001017563_dup1	ankrd16	ankyrin repeat domain 16	protein_coding	NP_001017563.2	ZDB-GENE-041210-253	2.3204	1.58367	3.67985e-05	0.000225126	2.34991	1.46688	175	63	2.03672	0.760017	1.47403	1.17968
550229	NM_001017567,NM_001017567_dup1	sncga	synuclein, gamma a	protein_coding	NP_001017567.1	ZDB-GENE-050417-18	2.232	5.96207	4.29357e-08	4.62636e-07	6.4431	5.30498	3673	1376	44.5088	17.3544	75.4177	26.9371
550254	NM_001017592,NM_001017592_dup1,XM_005156142,XM_009306628	arhgap17a	Rho GTPase activating protein 17a	protein_coding	NP_001017592.1	ZDB-GENE-050417-56	-3.45729	2.7799	1.29735e-12	2.49655e-11	2.02417	3.53771	131	379	0.568538	1.98765	0.815688	2.09618
550261	NM_001017598	sostdc1a	sclerostin domain containing 1a	protein_coding	NP_001017598.2	ZDB-GENE-050417-64	2.05155	1.02174	0.00147307	0.00582828	1.86635	1.19419	113	46	1.2986	0.548073	2.20041	0.850705
550264	NM_001017601	fcf1	FCF1 rRNA-processing protein	protein_coding	NP_001017601.1	ZDB-GENE-050417-67	-7.20081	6.19739	7.55937e-37	5.59846e-35	4.23958	7.02064	764	4601	10.7742	67.5826	18.2564	104.9
550273	NM_001017610	ascc1	activating signal cointegrator 1 complex subunit 1	protein_coding	NP_001017610.1	ZDB-GENE-050417-80	-2.26012	3.4831	3.84594e-07	3.57928e-06	2.97042	4.04072	292	552	3.93642	7.76222	6.67006	12.0483
550283	NM_001017620	tmem256	transmembrane protein 256	protein_coding	NP_001017620.1	ZDB-GENE-050417-92	-2.02661	4.17307	4.15448e-06	3.16943e-05	3.68881	4.65025	508	861	10.3409	18.2523	17.522	28.3308
550285	NM_001017622,XM_009298171,XM_009298172	cdk10	cyclin-dependent kinase 10	protein_coding	NP_001017622.2;XP_009296446.1;XP_009296447.1	ZDB-GENE-050417-94	-2.71297	3.41744	9.1642e-10	1.2706e-08	2.75212	4.0505	245	556	2.14025	4.9185	3.62654	7.63436
550286	NM_001017623	hrasa	v-Ha-ras Harvey rat sarcoma viral oncogene homolog a	protein_coding	NP_001017623.1	ZDB-GENE-050417-95	-2.06366	3.11811	9.8496e-06	6.90095e-05	2.73192	3.66101	241	416	2.61867	4.71113	4.4372	7.3125
550289	NM_001017626	pcyox1	prenylcysteine oxidase 1	protein_coding	NP_001017626.1	ZDB-GENE-050417-98	-4.85819	0.806438	3.73252e-10	5.42544e-09	0.664862	1.94724	25	102	0.213444	0.90295	0.36167	1.40153
550321	NM_001017628,XM_005159719	asb4	ankyrin repeat and SOCS box containing 4	protein_coding	NP_001017628.1;XP_005159776.1	ZDB-GENE-050417-100	3.19943	2.39245	2.93185e-10	4.3335e-09	3.15241	1.79257	337	88	3.27006	0.871272	5.54095	1.35236
550332	NM_001017639	dctd	dCMP deaminase	protein_coding	NP_001017639.1	ZDB-GENE-050417-116	-2.12037	0.0407367	0.00758323	0.0236014	0.706862	1.22908	27	48	0.285832	0.538563	0.484327	0.835943
550336	NM_001017643,XM_021468819	zgc:110222	zgc:110222	protein_coding	NP_001017643.1;XP_021324494.1	ZDB-GENE-050417-121	-2.27374	0.722101	0.000605452	0.00269342	0.988048	1.69612	42	80	0.513546	0.878585	0.870177	1.36372
550339	NM_001017646,NM_001017646_dup1,XM_009295306	wdr73	WD repeat domain 73	protein_coding	NP_001017646.1	ZDB-GENE-050417-126	2.02627	2.50081	5.54546e-05	0.000326077	3.08633	2.23158	320	132	3.50146	1.49478	1.94597	2.32015
550351	NM_001017658	zgc:112492	zgc:112492	protein_coding	NP_001017658.1	ZDB-GENE-050417-143	-4.08759	1.50194	5.11382e-11	8.25472e-10	1.07079	2.46168	47	161	0.363879	1.30834	0.616573	2.03078
550357	NM_001017664,NM_001017664_dup1,NM_001017664_dup2,XM_021470164,XM_021470165,XM_021470166	cremb	cAMP responsive element modulator b	protein_coding	NP_001017664.1;XP_021325839.1;XP_021325840.1;XP_021325841.1	ZDB-GENE-050417-150	-2.75467	0.393583	0.000134138	0.000720091	0.747673	1.52418	29	67	0.280447	0.630708	0.354811	0.461387
550361	XM_005164059,XM_009299563,XM_021474192,XM_021474195,XM_021474199	cpt1cb	carnitine palmitoyltransferase 1Cb, transcript variant X4	protein_coding	XP_005164116.1;XP_009297838.1;XP_021329867.1;XP_021329870.1;XP_021329874.1	ZDB-GENE-050417-155	-7.1054	1.47711	1.14696e-17	3.41701e-16	0.747673	2.54711	29	173	0.152915	0.976342	0.259108	1.51545
550388	NM_001017693,XM_005156994	srd5a2b	steroid-5-alpha-reductase, alpha polypeptide 2b	protein_coding	NP_001017693.1;XP_005157051.1	ZDB-GENE-050417-182	-2.81582	1.26545	1.73062e-06	1.42188e-05	1.1642	2.17007	53	125	0.590259	1.4602	1.00016	2.26648
550391	NM_001017696,XM_009299749	mrpl12	mitochondrial ribosomal protein L12	protein_coding	NP_001017696.1;XP_009298024.1	ZDB-GENE-050417-187	2.15628	6.48978	1.27416e-07	1.27799e-06	6.95074	5.85557	5240	2032	75.3985	30.5625	127.759	47.4384
550397	NM_001017702	c1qtnf4	C1q and TNF related 4	protein_coding	NP_001017702.1	ZDB-GENE-050417-198	-2.1542	0.943581	0.000696347	0.00304877	1.13373	1.83848	51	92	0.515766	0.974538	0.873938	1.51265
550398	NM_001017703	srd5a2a	steroid-5-alpha-reductase, alpha polypeptide 2a	protein_coding	NP_001017703.1	ZDB-GENE-050417-199	-3.34525	5.41838	1.11432e-15	2.83748e-14	4.36947	6.06196	840	2350	12.6936	37.0093	21.5086	57.4448
550404	NM_001017709	gpd1a	glycerol-3-phosphate dehydrogenase 1a	protein_coding	NP_001017709.1	ZDB-GENE-050417-209	2.19413	0.705575	0.00125741	0.00508208	1.65733	0.985592	92	35	1.00864	0.39808	1.70909	0.617889
550407	NM_001017712,NM_001017712_dup1,NM_001017712_dup2	barhl1a	BarH-like homeobox 1a	protein_coding	NP_001017712.2	ZDB-GENE-050417-212	3.12909	-1.50818	0.0310526	0.075813	0.530986	0.189057	19	5	0.137158	0.03877	0.051158	0.060178
550411	NM_001017716	yod1	YOD1 deubiquitinase	protein_coding	NP_001017716.1	ZDB-GENE-050417-217	-2.23702	0.326202	0.00250094	0.00914186	0.806805	1.42235	32	60	0.389544	0.779393	0.660062	1.20975
550414	NM_001017719	zgc:112175	zgc:112175	protein_coding	NP_001017719.1	ZDB-GENE-050417-220	-2.13694	1.40424	0.000224054	0.00112525	1.41283	2.18791	71	127	0.849295	1.58581	1.43909	2.46145
550419	NM_001017724,NM_001017724_dup1	zgc:112160	zgc:112160	protein_coding	NP_001017724.1	ZDB-GENE-050417-229	-17.7656	2.90875	2.69756e-43	2.51052e-41	0.844921	3.92579	34	507	0.327762	5.1436	0.555376	7.98375
550420	NM_001309529,NM_001309529_dup1	gucy1a3	guanylate cyclase 1, soluble, alpha 3	protein_coding	NP_001296458.1	ZDB-GENE-050417-230	2.09396	1.90653	0.000112482	0.000614184	2.58201	1.75715	213	85	1.18422	0.490831	1.62187	0.761854
550429	XM_017351505	steap4	STEAP family member 4	protein_coding	XP_017206994.1	ZDB-GENE-070424-244	3.23733	5.19712	9.70665e-15	2.29136e-13	5.83143	4.19205	2389	617	9.21076	2.47726	15.6072	3.84514
550433	NM_001017738	cryba1l1	crystallin, beta A1, like 1	protein_coding	NP_001017738.1	ZDB-GENE-050417-249	-19.0441	9.03301	7.87654e-74	1.70791e-71	5.73514	9.9606	2232	35546	38.7455	642.708	65.6522	997.594
550434	NM_001017739	mad2l1	MAD2 mitotic arrest deficient-like 1 (yeast)	protein_coding	NP_001017739.1	ZDB-GENE-030515-3	-2.02333	1.85375	0.000242117	0.00120474	1.75064	2.53322	101	171	1.80663	3.19372	3.06125	4.95721
550443	NM_001017748,NM_001017748_dup1,XM_005159012,XM_017351921	tmem243a	transmembrane protein 243, mitochondrial a	protein_coding	NP_001017748.1	ZDB-GENE-050417-264	-2.22863	1.36252	0.000134817	0.00072263	1.36116	2.17007	67	125	0.522019	0.919155	0.625332	1.16914
550445	NM_001017750	acta1a	actin, alpha 1a, skeletal muscle	protein_coding	NP_001017750.1	ZDB-GENE-050417-267	4.19873	3.15224	1.17218e-16	3.25685e-15	3.92954	2.13371	608	121	5.93315	1.22668	10.0534	1.90401
550449	NM_001017753,XM_005159984,XM_009292651,XM_021474745,XM_021474750	asb5b	ankyrin repeat and SOCS box containing 5b	protein_coding	NP_001017753.1;XP_005160041.1;XP_009290926.1;XP_021330420.1;XP_021330425.1	ZDB-GENE-050417-271	2.0747	4.38579	1.78384e-06	1.46332e-05	4.86411	3.86332	1201	484	12.1056	5.15707	20.5122	8.00466
550456	NM_001017760,NM_001017760_dup1,XM_021469325	lrrc39	leucine rich repeat containing 39	protein_coding	NP_001017760.1	ZDB-GENE-050417-279	3.76833	0.424671	2.31574e-06	1.86743e-05	1.5916	0.615481	86	19	0.653151	0.147205	0.369562	0.079469
550458	NM_001017762,NM_001328501	tubb6	tubulin, beta 6 class V	protein_coding	NP_001017762.2;NP_001315430.1	ZDB-GENE-070424-195	-2.7514	5.17891	1.59171e-11	2.713e-10	4.34308	5.75742	824	1896	8.42425	20.1901	14.2744	31.3386
550460	NM_001017763,NM_001017763_dup1,XM_021470488	hexa	hexosaminidase A (alpha polypeptide)	protein_coding	NP_001017763.1	ZDB-GENE-050417-283	-3.6539	3.1019	2.71637e-14	6.0331e-13	2.2254	3.85217	157	480	1.29094	3.90307	2.18743	5.16644
550467	NM_001017770,XM_005158841,XM_009293194,XM_009293195	slc24a4a	solute carrier family 24 (sodium/potassium/calcium exchanger), member 4a	protein_coding	NP_001017770.1;XP_005158898.1;XP_009291469.1;XP_009291470.1	ZDB-GENE-050417-291	3.43774	2.12581	1.5369e-10	2.33905e-09	2.93552	1.55201	284	69	1.95572	0.488904	3.31387	0.758864
550468	NM_001017771	zgc:112437	zgc:112437	protein_coding	NP_001017771.1	ZDB-GENE-050417-293	4.88931	-0.152503	3.24674e-06	2.54714e-05	1.25192	0.356184	59	10	0.844592	0.141135	1.43112	0.219066
550481	NM_001017784	rhoub	ras homolog family member Ub	protein_coding	NP_001017784.2	ZDB-GENE-050417-308	-3.22778	4.89149	1.58669e-14	3.62355e-13	3.90944	5.53237	599	1617	2.27156	6.38244	3.84904	9.90666
550484	NM_001017787	leprot	leptin receptor overlapping transcript	protein_coding	NP_001017787.1	ZDB-GENE-050417-314	-2.0847	2.23185	4.80184e-05	0.000287005	2.00746	2.86806	129	225	1.27281	2.31066	2.1567	3.58655
550489	NM_001204222	ccs	copper chaperone for superoxide dismutase	protein_coding	NP_001191151.2	ZDB-GENE-050417-322	-2.4318	0.0640792	0.00159636	0.00623282	0.664862	1.27988	25	51	0.436977	0.920482	0.740435	1.42875
550497	NM_001017799	zgc:110333	zgc:110333	protein_coding	NP_001017799.1	ZDB-GENE-050417-331	2.91344	2.62218	1.92329e-09	2.55705e-08	3.33088	2.03858	387	111	3.3994	1.01177	5.7601	1.57044
550500	NM_001017802,NM_001017802_dup1	zgc:110329	zgc:110329	protein_coding	NP_001017802.1	ZDB-GENE-050417-334	2.77982	1.79054	2.68493e-07	2.56458e-06	2.58201	1.48142	213	64	1.72324	0.534715	1.51697	0.821808
550507	NM_001017809,XM_005160067,XM_005160068	bdh2	3-hydroxybutyrate dehydrogenase, type 2	protein_coding	NP_001017809.1;XP_005160124.1;XP_005160125.1	ZDB-GENE-050417-343	-2.46471	2.98277	7.26021e-08	7.58212e-07	2.47062	3.60898	194	400	2.7375	5.90598	4.63854	9.1671
550519	NM_001017821	rgs5b	regulator of G protein signaling 5b	protein_coding	NP_001017821.1	ZDB-GENE-050417-359	2.95715	2.86355	4.24225e-10	6.11984e-09	3.55725	2.21427	460	130	6.90261	2.02429	11.6961	3.14205
550520	NM_001017822	zgc:110204	zgc:110204	protein_coding	NP_001017822.1	ZDB-GENE-050417-360	-2.38002	-0.564144	0.00931543	0.0280825	0.459082	0.923046	16	32	0.087067	0.187761	0.147531	0.291437
550524	NM_001111232,NM_001111232_dup1	cbsa	cystathionine-beta-synthase a	protein_coding	NP_001104702.1	ZDB-GENE-050417-367	-4.93793	1.59502	8.63631e-14	1.84977e-12	1.00498	2.58126	43	178	0.231358	1.00917	0.201694	0.775756
550525	NM_001017827,NM_001328421,XM_009307160	zgc:110197	zgc:110197	protein_coding	NP_001017827.1;NP_001315350.1;XP_009305435.1	ZDB-GENE-050417-368	2.04337	0.751527	0.00263209	0.00955814	1.668	1.04554	93	38	1.39527	0.590808	2.36421	0.917036
550528	NM_001017830,XM_009299879	baiap2l1b	BAI1-associated protein 2-like 1b	protein_coding	NP_001017830.1;XP_009298154.1	ZDB-GENE-050417-371	-4.79551	5.2386	3.64371e-24	1.62026e-22	3.80938	5.9875	556	2230	3.31861	13.8689	5.62321	21.5269
550539	NM_001017841,XM_005158600	slc18b1	solute carrier family 18, subfamily B, member 1	protein_coding	NP_001017841.1;XP_005158657.1	ZDB-GENE-050417-386	-3.29619	0.961259	2.97361e-07	2.82493e-06	0.918259	1.97833	38	105	0.218687	0.638441	0.370553	0.990971
550540	NM_001017842,XM_009294718	henmt1	HEN1 methyltransferase homolog 1 (Arabidopsis)	protein_coding	NP_001017842.1;XP_009292993.1	ZDB-GENE-050417-387	-2.51699	0.204102	0.000658114	0.00289948	0.706862	1.3764	27	57	0.183123	0.402819	0.310292	0.625245
550541	NM_001017843,XM_005172467	nudt18	nudix (nucleoside diphosphate linked moiety X)-type motif 18	protein_coding	NP_001017843.1;XP_005172524.1	ZDB-GENE-050417-388	2.35734	2.18124	3.723e-06	2.87466e-05	2.86308	1.87198	268	95	3.41289	1.26235	5.78297	1.95939
550549	NM_001017851,NM_001017851_dup1,XM_005156639,XM_021480575	eif4e1c	eukaryotic translation initiation factor 4E family member 1c	protein_coding	NP_001017851.2	ZDB-GENE-050417-398	-4.70301	5.61585	4.64075e-24	2.05493e-22	4.1849	6.35485	734	2887	6.45712	26.3823	10.9412	35.1101
550552	NM_001017854	atg16l1	ATG16 autophagy related 16-like 1 (S. cerevisiae)	protein_coding	NP_001017854.1	ZDB-GENE-050417-401	-2.5099	1.29978	1.3234e-05	9.00813e-05	1.25192	2.16106	59	124	0.788758	1.71897	1.33651	2.66814
550557	NM_001017859,NM_001017859_dup1,XM_005155951,XM_005155953,XM_021479612	palm1a	paralemmin 1a	protein_coding	NP_001017859.1	ZDB-GENE-050417-409	-8.72494	4.58128	8.60394e-39	6.8548e-37	2.56499	5.45712	210	1533	1.80561	13.7017	1.62786	11.988
550561	NM_001017863	ppp1r14aa	protein phosphatase 1, regulatory (inhibitor) subunit 14Aa	protein_coding	NP_001017863.1	ZDB-GENE-050417-413	2.21667	5.33879	7.793e-08	8.10634e-07	5.82489	4.70704	2378	897	39.2985	15.4227	66.5893	23.9387
550562	NM_001017864,XM_017357328	spinb	spindlin b	protein_coding	NP_001017864.1;XP_017212817.1	ZDB-GENE-050417-414	-2.57914	-0.328992	0.00323827	0.0113955	0.507414	1.06498	18	39	0.213033	0.49434	0.360973	0.767301
550564	NM_001017866,NM_001017866_dup1,NM_001017866_dup2	faub	Finkel-Biskis-Reilly murine sarcoma virus (FBR-MuSV) ubiquitously expressed b	protein_coding	NP_001017866.2	ZDB-GENE-050417-416	-2.87382	4.12508	1.54313e-11	2.63447e-10	3.32077	4.74671	384	923	8.31066	20.8018	3.93734	4.29984
550565	NM_001017867,NM_001017867_dup1,NM_001017867_dup2	gnpda1	glucosamine-6-phosphate deaminase 1	protein_coding	NP_001017867.1	ZDB-GENE-050417-417	-2.68264	2.59163	1.84322e-08	2.10397e-07	2.08913	3.2835	139	312	2.09186	4.90004	2.25087	2.22006
550569	NM_001017871	myl10	myosin, light chain 10, regulatory	protein_coding	NP_001017871.1	ZDB-GENE-050417-421	13.1109	3.45607	2.24725e-41	1.93715e-39	4.40817	1.34494	864	55	19.8634	1.31759	33.6576	2.04513
550573	NM_001017875,XM_021480107	c1qtnf1	C1q and TNF related 1	protein_coding	NP_001017875.1;XP_021335782.1	ZDB-GENE-050417-427	-2.26548	2.14862	8.29572e-06	5.92878e-05	1.88476	2.82879	115	218	0.672649	1.41935	1.13977	2.20308
550584	NM_001017885,XM_021467652	chrna5	cholinergic receptor, nicotinic, alpha 5	protein_coding	NP_001017885.1;XP_021323327.1	ZDB-GENE-050417-440	8.3618	0.341054	3.90657e-11	6.3646e-10	1.64658	0.324272	91	9	0.612144	0.063455	1.03725	0.098493
550588	NM_001017889	zgc:110626	zgc:110626	protein_coding	NP_001017889.1	ZDB-GENE-050417-447	-2.19345	0.510011	0.00151521	0.0059647	0.900271	1.53816	37	68	0.356389	0.682985	0.603883	1.06011
550591	NM_001017892,NM_001017892_dup1	zgc:113208	zgc:113208	protein_coding	NP_001017892.1	ZDB-GENE-050417-450	2.16565	5.97448	1.30356e-07	1.30313e-06	6.44193	5.34629	3670	1417	34.6566	13.9266	58.7237	21.6165
550594	NM_001017895	commd10	COMM domain containing 10	protein_coding	NP_001017895.1	ZDB-GENE-050417-454	-2.03482	0.97031	0.0016626	0.00645552	1.17919	1.83848	54	92	3.98133	7.12062	6.74615	11.0524
550602	NM_001017903,NM_001348483,XM_005164743,XM_009300279,XM_021475014	epyc	epiphycan	protein_coding	NP_001017903.3;NP_001335412.1;XP_005164800.1;XP_009298554.1;XP_021330689.1	ZDB-GENE-041008-9	3.92855	2.85953	1.08743e-14	2.53849e-13	3.63816	1.96804	489	104	2.65088	0.552736	4.49178	0.857941
550603	NM_001017904	mhc1laa	major histocompatibility complex class I LAA	protein_coding	NP_001017904.1	ZDB-GENE-050417-464	-2.313	1.3115	8.01916e-05	0.000455857	1.30757	2.14288	63	122	0.549078	1.11626	0.930385	1.73263
550604	XM_017356396,XM_021471699,XM_021474046,XM_021476699	zgc:113050	zgc:113050, transcript variant X2	protein_coding	XP_021327374.1	ZDB-GENE-050417-465	-2.16513	2.56796	8.11421e-06	5.81288e-05	2.23978	3.18031	159	288	0.521561	1.02259	0.883757	1.58723
550608	NM_001017909,XM_021468057	apoa4a	apolipoprotein A-IV a	protein_coding	NP_001017909.1;XP_021323732.1	ZDB-GENE-050417-469	-24.0643	3.93611	3.88793e-60	6.1026e-58	1.14904	4.92485	52	1049	0.751948	16.1141	1.27414	25.0119
550609	NM_001017910,XM_005158424	rpz4	rapunzel 4	protein_coding	NP_001017910.1;XP_005158481.1	ZDB-GENE-050417-472	-3.00572	2.16647	3.92946e-09	4.99687e-08	1.68911	2.94352	95	239	0.82784	2.21751	1.40273	3.44196
552927	NM_001020497,NM_001020497_dup1	casp6	caspase 6, apoptosis-related cysteine peptidase	protein_coding	NP_001018333.1	ZDB-GENE-030825-4	-2.10998	-0.0157442	0.00834948	0.0256372	0.686014	1.19419	26	46	0.255933	0.464736	0.433665	0.72135
552980	NM_001128681,XM_005156840,XM_005156842,XM_021480576	vcla	vinculin a	protein_coding	NP_001122153.1;XP_005156897.1;XP_005156899.1;XP_021336251.1	ZDB-GENE-050506-61	-2.28442	3.37579	3.28711e-07	3.09896e-06	2.86771	3.94428	269	514	0.731211	1.51087	1.239	2.34514
552994	XM_003198184,XM_009299838,XM_017354840	im:6904045	im:6904045, transcript variant X1	protein_coding	XP_003198232.2;XP_009298113.1;XP_017210329.1	ZDB-GENE-050506-75	-5.16511	2.53703	1.10962e-18	3.52549e-17	1.52272	3.41809	80	346	2.39894	11.0424	4.06487	17.1397
553066	NM_001256216,NM_001256216_dup1	pyroxd2	pyridine nucleotide-disulphide oxidoreductase domain 2	protein_coding	NP_001243145.1	ZDB-GENE-050506-147	6.01083	-0.388245	1.5521e-06	1.28778e-05	1.13373	0.258248	51	7	0.346871	0.044976	0.587754	0.069811
553164	NM_001020510,XM_005160312,XM_009294504,XM_021468417	lats1	large tumor suppressor kinase 1	protein_coding	NP_001018346.1;XP_005160369.1;XP_009292779.1;XP_021324092.1	ZDB-GENE-050523-2	2.20088	5.06433	1.30355e-07	1.30313e-06	5.55213	4.4504	1961	745	4.25688	1.68738	7.21307	2.61911
553178	NM_001018125,XM_009305688	cryba4	crystallin, beta A4	protein_coding	NP_001018135.1;XP_009303963.1	ZDB-GENE-050522-143	-28.386	10.9063	5.909e-90	2.21936e-87	7.04021	11.8567	5578	132405	120.749	2986.82	204.602	4636.06
553184	NM_001018130	crybb3	crystallin, beta B3	protein_coding	NP_001018140.1	ZDB-GENE-060130-2	-35.7547	12.8059	1.91105e-99	1.05777e-96	8.60974	13.7662	16640	497509	250.47	7797.83	424.408	12103.6
553191	NM_001018141,XM_005165984,XM_009302519,XM_021476870,XM_021476871	tubgcp5	tubulin, gamma complex associated protein 5	protein_coding	NP_001018151.1;XP_005166041.1;XP_009300794.1;XP_021332545.1;XP_021332546.1	ZDB-GENE-050522-344	2.04554	5.63655	1.11514e-06	9.50998e-06	6.08188	5.07143	2850	1165	11.1047	4.63758	18.8163	7.19833
553212	XM_021471381,XM_678306	st8sia6	ST8 alpha-N-acetyl-neuraminide alpha-2,8-sialyltransferase 6	protein_coding	XP_021327056.1	ZDB-GENE-060322-9	2.00416	6.16225	1.82533e-06	1.49444e-05	6.592	5.6039	4077	1701	12.331	5.36106	20.8943	8.32129
553213	XM_009297635,XM_021470400,XM_021473813,XM_021473814,XM_021473815,XM_021474561,XM_690640	ift140	intraflagellar transport 140 homolog (Chlamydomonas), transcript variant X2	protein_coding	XP_009295910.1;XP_021326075.1;XP_695732.4	ZDB-GENE-040724-165	2.05886	4.77576	1.58546e-06	1.31339e-05	5.23984	4.23774	1571	638	6.07361	2.65463	10.2914	4.12044
553214	NM_001099237,NM_001099237_dup1,XM_005161956,XM_005161957	eif4ba	eukaryotic translation initiation factor 4Ba	protein_coding	NP_001092707.2	ZDB-GENE-060629-1	-2.47602	5.69835	7.81131e-10	1.09166e-08	4.94749	6.22746	1275	2640	7.33884	15.89	6.24423	14.9532
553216	NM_001037371	pm20d1.1	peptidase M20 domain containing 1, tandem duplicate 1	protein_coding	NP_001032448.1	ZDB-GENE-051120-102	-3.15891	0.212101	2.75569e-05	0.000173794	0.621602	1.43734	23	61	0.214136	0.591813	0.362842	0.918596
553238	NM_001123233	esyt3	extended synaptotagmin-like protein 3	protein_coding	NP_001116705.1	ZDB-GENE-050809-35	-2.19943	4.36207	2.48208e-07	2.38381e-06	3.78997	4.86926	548	1008	2.79885	5.36311	4.74251	8.32447
553257	NM_001128682	klhl40a	kelch-like family member 40a	protein_coding	NP_001122154.1	ZDB-GENE-050916-1	11.0468	-0.758199	5.91441e-07	5.34815e-06	0.970915	0.116379	41	3	0.317127	0.023733	0.537354	0.036837
553259	XM_009302855	LOC553259	spore coat protein SP96	protein_coding	XP_009301130.1	.	2.89083	-1.36173	0.0397031	0.0926215	0.577005	0.224067	21	6	0.328754	0.094788	0.557056	0.147127
553269	NM_001089363,NM_001089363_dup1,XM_005159222,XM_005159223,XM_005159224,XM_009293814,XR_002456008	ccnl1a	cyclin L1a	protein_coding	NP_001082832.1;XP_005159279.1;XP_005159280.1;XP_005159281.1;XP_009292089.1	ZDB-GENE-050419-206	2.456	7.3717	5.90729e-10	8.36687e-09	7.88442	6.59694	10048	3421	66.6351	23.3172	52.9248	22.5363
553303	NM_001199990,XM_005160571,XM_005160572,XM_005160573,XM_009300714	cep135	centrosomal protein 135	protein_coding	NP_001186919.1;XP_005160628.1;XP_005160629.1;XP_005160630.1;XP_009298989.1	ZDB-GENE-041210-325	3.78685	4.49836	2.35147e-17	6.87878e-16	5.19535	3.37979	1522	336	4.88146	1.11083	8.27137	1.72421
553305	XM_679071	ipo4	importin 4	protein_coding	XP_684163.4	ZDB-GENE-041014-307	-2.30131	4.68157	3.53289e-08	3.8742e-07	4.0466	5.19899	663	1276	2.61536	5.24692	4.4316	8.14413
553310	XM_009297958,XM_017354204,XM_021470668,XM_021473836,XM_021473837	elmo3	engulfment and cell motility 3, transcript variant X1	protein_coding	XP_009296233.1;XP_017209693.1;XP_021326343.1	ZDB-GENE-050309-39	-6.58739	3.19819	3.3389e-26	1.66415e-24	1.77058	4.07947	103	568	0.737569	2.95513	1.24977	4.58688
553311	XM_021472960,XM_691174	p3h3	prolyl 3-hydroxylase 3	protein_coding	XP_021328635.1	ZDB-GENE-060503-231	-7.22233	3.94771	1.60512e-31	9.92957e-30	2.24691	4.81144	160	967	0.867196	5.35391	1.46942	8.31019
553318	NM_001256242	gtf3c3	general transcription factor IIIC, polypeptide 3	protein_coding	NP_001243171.1	ZDB-GENE-040914-80	8.81721	6.02193	1.27939e-42	1.16997e-40	6.87735	3.82962	4978	472	26.2952	2.5915	44.5558	4.02245
553326	NM_001327864,XM_005166551,XR_223879	hacd1	3-hydroxyacyl-CoA dehydratase 1	protein_coding	NP_001314793.1;XP_005166608.1	ZDB-GENE-170413-2	2.61428	0.239342	0.00062469	0.00276613	1.38722	0.692498	69	22	0.442079	0.144291	0.74908	0.223964
553333	NM_001089364	jph2	junctophilin 2	protein_coding	NP_001082833.1	ZDB-GENE-030131-9848	2.1523	1.23966	0.000455892	0.00209637	2.04887	1.29642	134	52	0.665822	0.265218	1.1282	0.411664
553336	NM_001171028	plppr3a	phospholipid phosphatase related 3a	protein_coding	NP_001164499.1	ZDB-GENE-070912-555	2.44912	1.54532	1.18646e-05	8.15248e-05	2.33659	1.4072	173	59	1.0517	0.369282	1.78205	0.57319
553341	NM_001128231,NM_001128231_dup1,XM_009304611,XM_009304620,XM_009304622,XM_021478650,XM_021478651,XM_021478652,XM_021478653,XM_021478654,XM_021478655,XM_021478656,XM_021478657,XM_021478658,XM_021478659,XM_021478660	lmo7a	LIM domain 7a	protein_coding	NP_001121703.1;XP_009302886.1;XP_009302895.1;XP_009302897.1;XP_021334325.1;XP_021334326.1;XP_021334327.1;XP_021334328.1;XP_021334329.1;XP_021334330.1;XP_021334331.1;XP_021334332.1;XP_021334333.1;XP_021334334.1;XP_021334335.1	ZDB-GENE-030219-74	-6.44388	8.71494	6.89078e-35	4.70564e-33	6.83152	9.50874	4821	25978	11.7449	63.5761	11.2243	49.754
553349	NM_001077536	znf185	zinc finger protein 185 with LIM domain	protein_coding	NP_001071004.1	ZDB-GENE-061103-355	-2.34901	5.38796	7.97558e-09	9.75533e-08	4.69964	5.89955	1067	2096	4.58873	9.38859	7.77535	14.5727
553354	XM_688921	col4a3	collagen, type IV, alpha 3	protein_coding	XP_694013.8	ZDB-GENE-070802-4	-3.79997	0.874423	2.53423e-08	2.83222e-07	0.806805	1.94724	32	102	0.084175	0.280898	0.142631	0.436003
553364	NM_001098731,NM_001098731_dup1,XM_009302276,XM_021476873	iqca1	IQ motif containing with AAA domain 1	protein_coding	NP_001092201.2;XP_009300551.1;XP_021332548.1	ZDB-GENE-050208-768	3.32589	-0.124331	0.000159196	0.000832814	1.20872	0.477211	56	14	0.279882	0.084443	0.328131	0.023978
553367	NM_001037373,NM_001037373_dup1	gpc1a	glypican 1a	protein_coding	NP_001032450.1	ZDB-GENE-051120-147	-2.08661	2.61951	2.25224e-05	0.00014489	2.30959	3.21118	169	295	0.808668	1.46572	0.494244	0.70434
553370	XM_002667778	fibina	fin bud initiation factor a	protein_coding	XP_002667824.1	ZDB-GENE-111031-2	2.75064	1.45928	1.65638e-06	1.36676e-05	2.30276	1.27988	168	51	2.64608	0.831576	4.48364	1.29075
553371	NM_001114342	krtt1c19e	keratin type 1 c19e	protein_coding	NP_001107814.1	ZDB-GENE-050506-95	16.2475	5.05311	6.8043e-58	9.86999e-56	5.986	2.27396	2664	137	26.1736	1.39665	44.3498	2.16784
553374	XM_003199114,XM_017357512	rab11fip1a	RAB11 family interacting protein 1 (class I) a, transcript variant X2	protein_coding	XP_003199162.3;XP_017213001.1	ZDB-GENE-051113-116	-2.12541	3.21081	3.65423e-06	2.83405e-05	2.7868	3.75975	252	448	1.00162	2.12408	1.69719	3.29694
553375	NM_001128232,XM_009301181,XM_009301182,XM_009301183,XM_009301184,XM_009301185	spef2	sperm flagellar 2	protein_coding	NP_001121704.1;XP_009299456.1;XP_009299457.1;XP_009299458.1;XP_009299459.1;XP_009299460.1	ZDB-GENE-060526-47	2.19387	0.347087	0.00358445	0.012478	1.41283	0.812372	71	27	0.189784	0.073734	0.321579	0.114448
553377	NM_001328330,XM_005160688	prg4b	proteoglycan 4b	protein_coding	NP_001315259.1;XP_005160745.1	ZDB-GENE-041014-324	-4.99508	1.3946	6.41431e-13	1.26441e-11	0.900271	2.41699	37	155	0.193561	0.8782	0.327979	1.36312
553395	XM_679999	xrcc2	X-ray repair complementing defective repair in Chinese hamster cells 2	protein_coding	XP_685091.2	ZDB-GENE-121029-1	-2.52028	-0.428589	0.00470459	0.0157416	0.48345	1.00585	17	36	0.240924	0.539298	0.408234	0.837083
553399	XR_661775,XR_661776	secisbp2	SECIS binding protein 2, transcript variant X2	misc_RNA	.	ZDB-GENE-050208-263	4.98694	4.31255	2.6031e-23	1.09066e-21	5.08622	2.92768	1408	236	9.07848	1.58422	15.383	2.45899
553402	NM_001256250,XM_005161455,XM_005161456,XM_021468835	gabrg2	gamma-aminobutyric acid (GABA) A receptor, gamma 2	protein_coding	NP_001243179.1;XP_005161512.1;XP_005161513.1;XP_021324510.1	ZDB-GENE-091118-65	-2.53041	0.488832	0.00030576	0.00147806	0.825989	1.56572	33	70	0.219905	0.494474	0.372618	0.767509
553410	NM_001020515	dpysl5b	dihydropyrimidinase-like 5b	protein_coding	NP_001018351.1	ZDB-GENE-050720-4	2.15509	5.57702	1.87377e-07	1.82797e-06	6.04705	4.96421	2781	1079	12.3557	4.98783	20.936	7.74198
553413	NM_001327973,NM_001327973_dup1	rhoh	ras homolog family member H	protein_coding	NP_001314902.1	ZDB-GENE-060228-7	6.92339	0.807333	7.7041e-13	1.50735e-11	1.97346	0.505946	125	15	0.710582	0.084292	0.314911	0.107827
553420	NM_001020520	mipb	major intrinsic protein of lens fiber b	protein_coding	NP_001018356.1	ZDB-GENE-050706-86	-38.8562	8.66552	1.40151e-100	7.96701e-98	4.41768	9.63066	870	28272	6.31469	213.768	10.6999	331.804
553421	XM_021478817	si:ch73-167c12.2	si:ch73-167c12.2	protein_coding	XP_021334492.1	ZDB-GENE-100922-268	-2.07312	0.961457	0.00125636	0.00507882	1.1642	1.83848	53	92	0.552057	0.99624	0.935431	1.54634
553434	NM_001256251,NM_001256251_dup1,NM_001256251_dup2,XM_021481022	msnb	moesin b	protein_coding	NP_001243180.1	ZDB-GENE-030717-7	-3.43575	3.37379	8.90058e-14	1.9025e-12	2.50078	4.08899	199	572	1.4925	4.48385	1.63652	6.29878
553453	NM_001159933,XM_009296551	samhd1	SAM domain and HD domain 1	protein_coding	NP_001153405.1;XP_009294826.1	ZDB-GENE-090313-386	-2.22663	5.0874	8.15614e-08	8.44232e-07	4.46281	5.58129	899	1674	4.49154	8.75639	7.61067	13.5914
553466	XM_681190	si:dkey-90m5.4	si:dkey-90m5.4	protein_coding	XP_686282.3	ZDB-GENE-041014-250	-55.1765	2.016	9.31074e-44	8.78174e-42	0.189666	3.15785	6	283	0.074819	3.68271	0.126778	5.71621
553473	XM_005169625	crybb1l1	crystallin, beta B1, like 1	protein_coding	XP_005169682.1	ZDB-GENE-100112-3	-20.8071	6.75547	2.19802e-73	4.71744e-71	3.44695	7.69462	423	7362	5.84689	106.196	9.90726	164.834
553474	NM_001033722,NM_001033722_dup1	crybgx	crystallin beta gamma X	protein_coding	NP_001028894.1	ZDB-GENE-070410-2	-287.227	10.4695	6.72622e-183	1.41473e-178	3.43763	11.4649	420	100908	8.87704	2223.32	15.0417	1831.62
553492	XM_009301727,XM_021476611,XM_021476612	LOC553492	transcription factor TFIIIB component B'' homolog, transcript variant X3	protein_coding	XP_009300002.1;XP_021332286.1;XP_021332287.1	.	-2.25573	1.06865	0.000247991	0.00122932	1.17919	1.94724	54	102	0.108492	0.214422	0.183835	0.33282
553508	NM_001044325,NM_001044325_dup1	ugt8	UDP glycosyltransferase 8	protein_coding	NP_001037790.1	ZDB-GENE-060616-129	-2.93713	2.15683	8.02902e-09	9.80118e-08	1.69955	2.92768	96	236	0.275876	0.707256	0.317409	0.291487
553513	NM_001025475,XM_005162508	idi1	isopentenyl-diphosphate delta isomerase 1	protein_coding	NP_001020646.1;XP_005162565.1	ZDB-GENE-050913-44	-2.52728	4.29653	1.79893e-09	2.40539e-08	3.59966	4.86372	475	1004	2.23621	4.87877	3.78914	7.5727
553515	XM_001337411	si:ch211-95j8.2	si:ch211-95j8.2	protein_coding	XP_001337447.2	ZDB-GENE-091204-28	2.75875	1.31735	2.62228e-06	2.09583e-05	2.18882	1.19419	152	46	1.17955	0.369656	1.99869	0.57377
553516	NM_001079703,NM_001079703_dup1	tdp2b	tyrosyl-DNA phosphodiesterase 2b	protein_coding	NP_001073171.1	ZDB-GENE-050816-1	-2.45461	1.90984	2.62683e-06	2.09837e-05	1.65733	2.65367	92	189	0.998964	2.11927	1.69269	0.097785
553534	NM_001025302,XM_005159919	nsun3	NOP2/Sun domain family, member 3	protein_coding	NP_001020473.1;XP_005159976.1	ZDB-GENE-050706-95	2.71359	1.35996	2.67675e-06	2.13339e-05	2.21816	1.22908	156	48	1.77214	0.590374	3.0028	0.916362
553537	XM_017353668	cyp2aa11	cytochrome P450, family 2, subfamily AA, polypeptide 11	protein_coding	XP_017209157.1	ZDB-GENE-110114-3	2.02221	2.83467	3.33631e-05	0.000206087	3.38686	2.50503	404	167	2.48729	1.06717	4.21458	1.65643
553542	NM_001020521,NM_001020521_dup1,NM_001328038,NM_001328038_dup1,XM_005172284,XM_009303058	zgc:109889	zgc:109889	protein_coding	NP_001018357.1;NP_001314967.1	ZDB-GENE-050522-547	-2.5371	5.5014	3.23405e-10	4.7468e-09	4.73305	6.04309	1093	2319	3.62884	8.93141	5.08629	9.22546
553545	NM_001020524	tmem127	transmembrane protein 127	protein_coding	NP_001018360.1	ZDB-GENE-050522-97	-2.86649	1.67987	1.55582e-07	1.53344e-06	1.40008	2.51213	70	168	0.698254	1.74121	1.18315	2.70266
553547	NM_001020526	pgpep1	pyroglutamyl-peptidase I	protein_coding	NP_001018362.1	ZDB-GENE-050522-88	-3.05514	-0.501836	0.000844689	0.00360665	0.409074	1.00585	14	36	0.114568	0.303506	0.19413	0.471093
553552	NM_001020531	zgc:109934	zgc:109934	protein_coding	NP_001018367.1	ZDB-GENE-050522-428	-2.53459	2.78759	6.26736e-08	6.61422e-07	2.289	3.44059	166	352	2.92465	6.44352	4.95567	10.0015
553573	NM_001020552	zgc:110006	zgc:110006	protein_coding	NP_001018388.1	ZDB-GENE-050522-119	-4.65177	1.05983	6.15449e-11	9.87395e-10	0.787362	2.13371	31	121	0.471685	1.93534	0.799245	3.00398
553584	NM_001020562,XM_009295679	endou2	endonuclease, polyU-specific 2	protein_coding	NP_001018398.1;XP_009293954.1	ZDB-GENE-050522-373	2.39745	0.272022	0.00145512	0.00576774	1.38722	0.741649	69	24	1.01887	0.347188	1.72642	0.538896
553586	NM_001020564,XM_005160691	paplnb	papilin b, proteoglycan-like sulfated glycoprotein	protein_coding	NP_001018400.1;XP_005160748.1	ZDB-GENE-030131-6023	2.83434	1.25099	2.09224e-06	1.70237e-05	2.14366	1.14023	146	43	1.14934	0.294917	1.94749	0.457763
553587	NM_001020565	apoea	apolipoprotein Ea	protein_coding	NP_001018401.1	ZDB-GENE-010724-18	-33.7913	6.34926	2.08238e-88	7.18013e-86	2.50674	7.31615	200	5655	2.9087	85.6248	4.92865	132.904
553588	NM_001020566,XM_005171167,XM_005171168	zgc:110130	zgc:110130	protein_coding	NP_001018402.2;XP_005171224.1;XP_005171225.1	ZDB-GENE-050522-208	2.07625	3.70887	4.07503e-06	3.11447e-05	4.21432	3.2414	750	302	7.22792	3.02469	12.2473	4.69484
553600	NM_001020576,XM_005166692,XM_005166693,XM_005166694,XM_005166695,XM_017357334,XM_021478258,XM_021478259	asb6	ankyrin repeat and SOCS box containing 6	protein_coding	NP_001018412.1;XP_005166749.1;XP_005166750.1;XP_005166751.1;XP_005166752.1;XP_017212823.1;XP_021333933.1;XP_021333934.1	ZDB-GENE-050522-338	-2.95125	0.843813	4.65818e-06	3.51924e-05	0.918259	1.8609	38	94	0.383387	0.995884	0.64963	1.54578
553602	NM_001020578,XM_005169640	alox5b.3	arachidonate 5-lipoxygenase b, tandem duplicate 3	protein_coding	NP_001018414.1;XP_005169697.1	ZDB-GENE-050522-330	-2.91764	1.69852	8.10527e-08	8.3938e-07	1.40008	2.53322	70	171	0.42201	1.07319	0.715074	1.66578
553614	NM_001020588	itih3a	inter-alpha-trypsin inhibitor heavy chain 3a	protein_coding	NP_001018424.1	ZDB-GENE-050522-262	-54.6596	3.20449	2.70302e-63	4.62217e-61	0.409074	4.25477	14	646	0.070982	3.51536	0.120276	5.45645
553628	XM_005164344,XR_001798147	ftr43	finTRIM family, member 43, transcript variant X2	protein_coding	XP_005164401.1	ZDB-GENE-090507-8	2.00996	-0.36276	0.0339197	0.0814606	0.970915	0.561752	41	17	0.365093	0.219261	0.61863	0.340331
553634	NM_001020607,XM_005156332,XM_021480111	casp7	caspase 7, apoptosis-related cysteine peptidase	protein_coding	NP_001018443.1;XP_005156389.1;XP_021335786.1	ZDB-GENE-050522-506	-4.35267	4.44875	1.23235e-20	4.57141e-19	3.19361	5.18906	348	1267	1.99684	7.66042	3.38354	11.8903
553639	NM_001020612,NM_001020612_dup1	gmpr	guanosine monophosphate reductase	protein_coding	NP_001018448.1	ZDB-GENE-050522-48	5.31666	2.3582	1.05195e-17	3.14286e-16	3.24796	1.3764	363	57	1.9622	0.320741	3.32484	0.497846
553653	NM_001020626,NM_001020626_dup1	amacr	alpha-methylacyl-CoA racemase	protein_coding	NP_001018462.1	ZDB-GENE-050522-484	-3.0899	0.412243	1.70498e-05	0.000112881	0.706862	1.56572	27	70	0.278884	0.75459	0.451266	1.17125
553655	NM_001020628	pygma	phosphorylase, glycogen, muscle A	protein_coding	NP_001018464.1	ZDB-GENE-050522-482	3.05181	2.11425	4.38722e-09	5.55882e-08	2.89067	1.63239	274	75	1.55376	0.442543	2.63277	0.686903
553657	NM_001020630,XM_021480399	rab12	RAB12, member RAS oncogene family	protein_coding	NP_001018466.1;XP_021336074.1	ZDB-GENE-050522-555	-6.59185	1.4321	1.51819e-16	4.18507e-15	0.767654	2.49789	30	166	0.36871	2.12892	0.624759	3.30445
553658	NM_001020631,XM_005168390,XM_021474893	wbp1lb	WW domain binding protein 1-like b	protein_coding	NP_001018467.1;XP_005168447.1;XP_021330568.1	ZDB-GENE-050522-112	-2.98775	2.69517	4.0817e-10	5.90849e-09	2.08117	3.4143	138	345	0.683998	1.85396	1.159	2.87767
553670	NM_001020643	klf7a	Kruppel-like factor 7a	protein_coding	NP_001018479.1	ZDB-GENE-050522-276	-13.8652	0.967074	2.49197e-20	9.00576e-19	0.330654	2.20554	11	129	0.053354	0.701504	0.090406	1.08885
553676	NM_001020649,XM_005171582	mgat3a	mannosyl (beta-1,4-)-glycoprotein beta-1,4-N-acetylglucosaminyltransferase a	protein_coding	NP_001018485.1;XP_005171639.1	ZDB-GENE-050522-249	-3.23853	-0.10039	0.00011673	0.000635563	0.507414	1.24621	18	49	0.06763	0.197412	0.114595	0.306418
553677	NM_001020650,NM_001020650_dup1,XM_009305935	twf2b	twinfilin actin-binding protein 2b	protein_coding	NP_001018486.1;XP_009304210.1	ZDB-GENE-050522-238	4.19532	1.30996	2.41519e-10	3.60787e-09	2.289	0.944198	166	33	1.41643	0.267969	0.851875	0.212963
553686	NM_001020661	tefb	thyrotrophic embryonic factor b	protein_coding	NP_001018497.1	ZDB-GENE-050522-224	-2.33014	2.94806	4.81358e-07	4.40574e-06	2.48879	3.555	197	384	1.48288	3.01104	2.51266	4.67365
553690	NM_001020665	ptk7a	protein tyrosine kinase 7a	protein_coding	NP_001018501.1	ZDB-GENE-050522-216	-2.57323	-0.873332	0.0174197	0.047124	0.35727	0.789181	12	26	0.13823	0.311193	0.234224	0.483025
553693	NM_001020667,NM_001309640,XM_021470765	raver1	ribonucleoprotein, PTB-binding 1	protein_coding	NP_001018503.2;NP_001296569.1;XP_021326440.1	ZDB-GENE-050522-99	-3.86883	3.44108	4.07598e-16	1.08245e-14	2.44603	4.18763	190	615	0.740905	2.53195	1.25543	3.93002
553697	NM_001020671	ubald1b	UBA-like domain containing 1b	protein_coding	NP_001018507.2	ZDB-GENE-050522-446	-3.19462	2.13885	6.0263e-10	8.52395e-09	1.62484	2.93826	89	238	0.783297	2.19745	1.32726	3.41082
553701	NM_001020674	gda	guanine deaminase	protein_coding	NP_001018510.1	ZDB-GENE-050522-434	-3.55064	1.99103	5.35201e-11	8.63258e-10	1.4504	2.84012	74	220	0.5942	1.84536	1.00684	2.86431
553710	NM_001020681,NM_001020681_dup1	crygm2d1	crystallin, gamma M2d1	protein_coding	NP_001018517.2	ZDB-GENE-050522-395	2.92547	3.30142	1.01652e-10	1.58398e-09	3.96242	2.58126	623	178	15.3251	4.54831	25.9676	7.05976
553712	NM_001020683,NM_001020683_dup1,XM_021470176,XR_002456608	zgc:112332	zgc:112332	protein_coding	NP_001018519.1	ZDB-GENE-050522-387	18.6044	6.32684	9.34042e-68	1.73856e-65	7.25913	3.19803	6499	292	82.4532	3.92528	139.713	6.09271
553718	NM_001111214	nefma	neurofilament, medium polypeptide a	protein_coding	NP_001104684.2	ZDB-GENE-050522-205	4.14323	2.83578	1.99923e-15	4.97632e-14	3.63	1.90472	486	98	2.37317	0.499183	4.02122	0.774819
553723	XM_021477340	wbp4	WW domain binding protein 4	protein_coding	XP_021333015.1	ZDB-GENE-050522-342	2.18353	0.851323	0.000820556	0.00351684	1.76065	1.06498	102	39	5.22372	2.05642	8.85131	3.19193
553726	NM_001020697	trim35-7	tripartite motif containing 35-7	protein_coding	NP_001018533.1	ZDB-GENE-050522-333	-3.05338	-1.81358	0.0384743	0.0901951	0.159737	0.447893	5	13	0.045987	0.128132	0.077923	0.198883
553730	NM_001020701,XM_021480580,XM_021480581	c13h10orf11	c13h10orf11 homolog (H. sapiens)	protein_coding	NP_001018537.1;XP_021336255.1;XP_021336256.1	ZDB-GENE-050522-285	-6.55969	-0.257949	9.45399e-08	9.6809e-07	0.275901	1.26314	9	50	0.02242	0.134311	0.03799	0.208475
553749	NM_001020720,XM_021481412	zgc:113279	zgc:113279	protein_coding	NP_001018556.1;XP_021337087.1	ZDB-GENE-050522-529	-3.47281	1.54295	2.33494e-09	3.06368e-08	1.19403	2.45433	55	160	0.341219	1.0472	0.578178	1.62544
553761	NM_001020727,XM_005162073,XM_005162074	arhgef3l	Rho guanine nucleotide exchange factor (GEF) 3, like	protein_coding	NP_001018563.1;XP_005162130.1;XP_005162131.1	ZDB-GENE-050522-85	3.42214	3.0978	7.29285e-13	1.43005e-11	3.82138	2.27396	561	137	2.92271	0.744036	4.95237	1.15487
553788	NM_001020750,XM_009294663,XM_009294664	map3k7	mitogen-activated protein kinase kinase kinase 7	protein_coding	NP_001018586.1;XP_009292938.1;XP_009292939.1	ZDB-GENE-041001-135	-2.36719	6.87481	3.01195e-09	3.8937e-08	6.14339	7.37477	2976	5891	11.0574	25.4038	18.7361	39.431
553795	NM_001020757,NM_001020757_dup1	nanp	N-acetylneuraminic acid phosphatase	protein_coding	NP_001018593.1	ZDB-GENE-050522-94	-3.32929	0.591356	2.20826e-06	1.78846e-05	0.747673	1.70854	29	81	0.36992	1.094	0.375814	1.69808
553809	NM_001020771,NM_001020771_dup1	irak1bp1	interleukin-1 receptor-associated kinase 1 binding protein 1	protein_coding	NP_001018607.1	ZDB-GENE-050522-272	2.19441	1.23126	0.000346774	0.00165165	2.04887	1.27988	134	51	1.94557	0.773644	2.03432	1.20083
553815	NM_001020777,XM_005172288	zgc:113305	zgc:113305	protein_coding	NP_001018613.1;XP_005172345.1	ZDB-GENE-050522-31	-2.24386	1.65645	4.5048e-05	0.000270949	1.54605	2.40941	82	154	0.599038	1.18262	1.01504	1.83563
553947	NM_001020780	uncx4.1	Unc4.1 homeobox (C. elegans)	protein_coding	NP_001018616.2	ZDB-GENE-050714-1	-3.28658	2.89913	5.11011e-12	9.24966e-11	2.15887	3.63197	148	407	1.21294	3.47595	2.05527	5.39527
553949	NM_001020781,NM_001020781_dup1,XM_005171862,XM_009301484,XM_009301485,XM_009301489,XM_009301491,XM_021476160,XM_021476161,XM_021476162,XM_021476163,XM_021476164	fcho2	FCH domain only 2	protein_coding	NP_001018617.1;XP_005171919.1;XP_009299759.1;XP_009299760.1;XP_009299764.1;XP_009299766.1;XP_021331835.1;XP_021331836.1;XP_021331837.1;XP_021331838.1;XP_021331839.1	ZDB-GENE-050522-228	3.08899	4.9459	1.36734e-13	2.86448e-12	5.5686	4.00342	1984	537	6.49856	3.05314	10.3975	3.97344
553954	NM_001020783	crygm2b	crystallin, gamma M2b	protein_coding	NP_001018619.1	ZDB-GENE-050516-10	-152.56	12.1784	1.27185e-160	4.45847e-157	5.93942	13.1692	2578	328895	68.0055	9036.64	115.232	14026.4
553955	NM_001023572,NM_001023572_dup1	zbtb24	zinc finger and BTB domain containing 24	protein_coding	NP_001018866.2	ZDB-GENE-081022-123	2.12897	1.20186	0.000559467	0.00251545	2.01584	1.27988	130	51	0.416106	0.170187	0.70507	0.264159
553967	NM_001020795,NM_001020795_dup1	crygm7	crystallin, gamma M7	protein_coding	NP_001018631.1	ZDB-GENE-050516-8	-142.581	10.2673	7.2558e-155	1.27176e-151	4.18304	11.2578	733	87409	14.9458	1857.37	25.3249	2882.96
553969	NM_001037438	cyp3a65	cytochrome P450, family 3, subfamily A, polypeptide 65	protein_coding	NP_001032515.1	ZDB-GENE-050604-1	-3.59701	2.28568	6.8706e-12	1.22778e-10	1.63575	3.10249	90	271	0.690784	2.17405	1.1705	3.37451
553978	NM_001020803	chrm5a	cholinergic receptor, muscarinic 5a	protein_coding	NP_001018639.1	ZDB-GENE-080723-32	7.40429	-0.346292	1.50047e-07	1.48236e-06	1.17919	0.224067	54	6	0.557512	0.06201	0.944675	0.09625
553997	NM_001024109,NM_001024109_dup1	pcdh1g9	protocadherin 1 gamma 9	protein_coding	NP_001019280.1	ZDB-GENE-050609-5	2.46602	5.91406	8.58283e-10	1.19236e-08	6.43804	5.15997	3660	1241	23.0387	8.13389	1.60324	0.435982
553999	NM_001024111,NM_001024111_dup1	pcdh1g11	protocadherin 1 gamma 11	protein_coding	NP_001019282.1	ZDB-GENE-050609-7	2.17299	6.14383	1.07742e-07	1.09212e-06	6.61114	5.50861	4132	1590	25.6049	10.2557	1.11616	0.66725
554005	NM_001024117,NM_001024117_dup1	pcdh1g18	protocadherin 1 gamma 18	protein_coding	NP_001019288.1	ZDB-GENE-050609-13	2.02036	4.08967	5.5974e-06	4.15714e-05	4.56625	3.61229	969	401	3.5027	1.50733	1.53346	0.97714
554012	NM_001024124,NM_001024124_dup1	pcdh1g26	protocadherin 1 gamma 26	protein_coding	NP_001019295.1	ZDB-GENE-050609-21	2.12581	3.85042	1.56394e-06	1.29709e-05	4.35963	3.3484	834	328	2.9666	1.21372	0.955006	1.21006
554013	NM_001024125,NM_001024125_dup1	pcdh1g29	protocadherin 1 gamma 29	protein_coding	NP_001019296.1	ZDB-GENE-050609-22	-2.76558	4.7744	2.112e-11	3.52613e-10	3.9559	5.36307	620	1434	2.20134	5.3076	2.34495	2.2066
554014	NM_001024126,NM_001024126_dup1	pcdh1g30	protocadherin 1 gamma 30	protein_coding	NP_001019297.1	ZDB-GENE-050609-23	2.32189	4.76488	2.539e-08	2.83604e-07	5.28213	4.11487	1619	583	5.7762	2.16274	2.56494	1.5119
554050	NM_001024072	itgbl1	integrin, beta-like 1	protein_coding	NP_001019243.1	ZDB-GENE-050522-410	-2.66538	2.90718	7.642e-09	9.38164e-08	2.34326	3.56869	174	388	2.07142	4.83075	3.50991	7.49817
554055	NM_001024180	pcdh2g7	protocadherin 2 gamma 7	protein_coding	NP_001019351.1	ZDB-GENE-050610-29	-3.7916	-1.87843	0.016576	0.0452424	0.129173	0.447893	4	13	0.014306	0.053274	0.024241	0.08269
554056	NM_001024181	pcdh2g8	protocadherin 2 gamma 8	protein_coding	NP_001019352.1	ZDB-GENE-050610-30	3.52762	-1.98951	0.0419754	0.0968164	0.383405	0.116379	13	3	0.048652	0.011951	0.082439	0.01855
554057	NM_001024182	pcdh2g9	protocadherin 2 gamma 9	protein_coding	NP_001019353.1	ZDB-GENE-050610-31	4.71783	-0.661606	8.39027e-05	0.000473625	0.953575	0.258248	40	7	0.156295	0.027308	0.264834	0.042387
554058	NM_001024183	pcdh2g10	protocadherin 2 gamma 10	protein_coding	NP_001019354.1	ZDB-GENE-050610-1	-12.38	-1.44355	2.95077e-05	0.000184393	0.0660317	0.692498	2	22	0.007417	0.09093	0.012568	0.14114
554063	NM_001024188	pcdh2g16	protocadherin 2 gamma 16	protein_coding	NP_001019359.1	ZDB-GENE-050610-6	4.29794	2.03102	3.71514e-13	7.53525e-12	2.90878	1.32895	278	54	1.12289	0.225052	1.90269	0.349319
554064	NM_001024189	pcdh2g17	protocadherin 2 gamma 17	protein_coding	NP_001019360.1	ZDB-GENE-050610-7	11.9161	2.94486	3.6212e-35	2.51369e-33	3.91169	1.12178	600	42	2.39235	0.171557	4.05372	0.266286
554076	NM_001024201	pcdh2g29	protocadherin 2 gamma 29	protein_coding	NP_001019372.1	ZDB-GENE-050610-20	-16.5348	3.00799	7.44208e-43	6.83534e-41	0.936025	4.01346	39	541	0.150229	2.20591	0.254556	3.42395
554089	NM_001024391	s100z	S100 calcium binding protein Z	protein_coding	NP_001019562.1	ZDB-GENE-050522-69	-2.30135	2.23693	4.57064e-06	3.45683e-05	1.93863	2.91166	121	233	1.68194	3.36977	2.84997	5.23046
554091	NM_001024393	dnajb9b	DnaJ (Hsp40) homolog, subfamily B, member 9b	protein_coding	NP_001019564.1	ZDB-GENE-050522-76	-2.02843	1.96492	0.000173784	0.000898967	1.8288	2.62776	109	185	1.67892	2.98129	2.84484	4.62747
554095	NM_001024651	fabp1b.1	fatty acid binding protein 1b, tandem duplicate 1	protein_coding	NP_001019822.1	ZDB-GENE-050522-96	-9.64858	5.33266	3.86545e-44	3.72945e-42	3.09821	6.20956	323	2607	10.6736	89.8228	18.0858	139.421
554100	NM_001024402	ndufs8b	NADH dehydrogenase (ubiquinone) Fe-S protein 8b	protein_coding	NP_001019573.2	ZDB-GENE-050522-131	2.59922	5.19815	1.92924e-10	2.90255e-09	5.75279	4.41675	2260	727	35.0333	11.7237	59.3621	18.1973
554107	NM_001024408,XM_005171867,XM_021476165	ela3l	elastase 3 like	protein_coding	NP_001019579.1;XP_005171924.1;XP_021331840.1	ZDB-GENE-060710-2	-15.5483	5.45996	2.83141e-59	4.25379e-57	2.65892	6.38706	227	2953	3.62444	53.0527	6.14142	82.347
554118	NM_001024414,XM_005171170,XM_021480424	anxa13l	annexin A13, like	protein_coding	NP_001019585.1;XP_005171227.1;XP_021336099.1	ZDB-GENE-050522-310	-2.53639	5.85388	2.58063e-10	3.83052e-09	5.07423	6.39092	1396	2961	13.7143	34.1171	23.2382	52.9557
554127	NM_001024422	tubb2	tubulin, beta 2A class IIa	protein_coding	NP_001019593.1	ZDB-GENE-050522-384	2.49923	4.20522	3.71471e-09	4.75542e-08	4.76819	3.52373	1121	375	10.8704	3.78027	18.4194	5.86764
554132	NM_001024427	crygmxl2	crystallin, gamma MX, like 2	protein_coding	NP_001019598.1	ZDB-GENE-050522-401	-10.1439	6.34776	6.10486e-48	6.61874e-46	3.96458	7.2216	624	5294	12.0151	106.198	20.3589	164.837
554136	NM_001024430	spra	sepiapterin reductase a	protein_coding	NP_001019601.2	ZDB-GENE-050522-412	-2.2577	2.46712	4.17786e-06	3.18611e-05	2.12829	3.10718	144	272	0.847485	1.66587	1.43602	2.58572
554141	NM_001327926	c9	complement component 9	protein_coding	NP_001314855.1	ZDB-GENE-050522-442	-11.011	3.12927	3.06775e-36	2.20973e-34	1.29386	4.08899	62	572	0.446973	4.32426	0.757373	6.712
554145	NM_001024438,NM_001204524	elovl8b	ELOVL fatty acid elongase 8b	protein_coding	NP_001019609.2;NP_001191453.1	ZDB-GENE-050522-453	-3.11544	0.614302	6.59642e-06	4.80622e-05	0.787362	1.70854	31	81	0.367585	1.02513	0.622853	1.59119
554147	NM_001024440	spc24	SPC24, NDC80 kinetochore complex component, homolog (S. cerevisiae)	protein_coding	NP_001019611.1	ZDB-GENE-050522-456	-3.51122	5.51469	8.05083e-17	2.25777e-15	4.40976	6.17251	865	2540	11.8159	36.155	20.0214	56.1189
554169	NM_001040331	nrl	neural retina leucine zipper	protein_coding	NP_001035421.1	ZDB-GENE-050729-1	-9.07606	3.00928	1.0605e-31	6.57977e-30	1.37425	3.95213	68	517	0.704663	5.65467	1.19401	8.77702
554269	XM_688948	col4a1	collagen, type IV, alpha 1	protein_coding	XP_694040.5	ZDB-GENE-081105-114	2.86447	1.05187	4.18087e-06	3.18725e-05	1.99056	1.02583	127	37	0.374223	0.11164	0.634102	0.173285
554270	XM_009291835	col4a4	collagen, type IV, alpha 4	protein_coding	XP_009290110.1	ZDB-GENE-101001-1	-6.19396	0.709121	4.34492e-12	7.95359e-11	0.530986	1.91547	19	99	0.048778	0.275257	0.082652	0.427247
554361	NM_001025168,XM_021476166,XM_021476168	lmx1ba	LIM homeobox transcription factor 1, beta a	protein_coding	NP_001020339.1;XP_021331841.1;XP_021331843.1	ZDB-GENE-050114-3	-2.04098	2.98955	1.79296e-05	0.000117884	2.63192	3.53771	222	379	1.66178	2.90847	2.8158	4.51445
554386	NM_001161597	cldnd1b	claudin domain containing 1b	protein_coding	NP_001155069.1	ZDB-GENE-040808-4	-2.43401	1.09007	6.21056e-05	0.000362148	1.14904	1.98855	52	106	0.447861	0.945499	0.758877	1.46758
554458	NM_001003526,XM_005164130	zgc:100868	zgc:100868	protein_coding	NP_001003526.1;XP_005164187.1	ZDB-GENE-040801-33	4.51079	2.73164	1.64167e-16	4.49599e-15	3.55437	1.75715	459	85	1.86851	0.361008	3.16609	0.560346
554488	NM_001003780,NM_001003780_dup1,XM_005165045	ypel1	yippee-like 1	protein_coding	NP_001003780.1	ZDB-GENE-040808-41	2.42007	6.25919	1.56235e-09	2.10647e-08	6.77218	5.51569	4625	1598	14.0343	7.14276	20.4156	5.29639
554606	NM_001128329,XM_017357680,XM_017357681,XM_021478681,XM_021478682,XM_021478683,XM_021478684	lypd6b	LY6/PLAUR domain containing 6B	protein_coding	NP_001121801.1;XP_017213169.1;XP_017213170.1;XP_021334356.1;XP_021334357.1;XP_021334358.1;XP_021334359.1	ZDB-GENE-050522-38	4.48416	0.545266	5.14222e-08	5.49295e-07	1.70991	0.588867	97	18	0.878403	0.15767	1.48841	0.244731
554650	NM_205571	bnip3lb	BCL2/adenovirus E1B interacting protein 3-like b	protein_coding	NP_991134.2	ZDB-GENE-040325-1	-2.55322	6.88641	1.23071e-10	1.90614e-09	6.07839	7.4177	2843	6070	16.8088	37.376	28.4816	58.014
554861	NM_001017542,XM_005169510,XM_021480582,XR_002459806	actr2b	ARP2 actin related protein 2b homolog	protein_coding	NP_001017542.1;XP_005169567.1;XP_021336257.1	ZDB-GENE-050410-4	-2.42721	1.33656	2.54535e-05	0.000161733	1.29386	2.17902	62	126	0.629039	1.38957	1.06587	2.15686
555204	NM_001044781,NM_001044781_dup1,XM_005160575	syndig1l	synapse differentiation inducing 1-like	protein_coding	NP_001038246.1	ZDB-GENE-041001-116	-2.32624	1.88675	9.80605e-06	6.87273e-05	1.6786	2.61463	94	183	0.446365	0.656119	0.446326	0.921755
555217	NM_212650,NM_212650_dup1	zbtb11	zinc finger and BTB domain containing 11	protein_coding	NP_997815.2	ZDB-GENE-030131-5055	2.44262	4.00677	1.22305e-08	1.44601e-07	4.56768	3.36418	970	332	4.01103	1.42609	6.65207	1.90622
555218	XM_017353039	oatx	organic anion transporter X	protein_coding	XP_017208528.1	ZDB-GENE-070115-1	-3.20312	-1.35971	0.0143062	0.04002	0.218988	0.615481	7	19	0.028096	0.084312	0.047607	0.130867
555239	NM_001077597,XM_005168881	mtmr10	myotubularin related protein 10	protein_coding	NP_001071065.2;XP_005168938.1	ZDB-GENE-061103-52	-2.74912	5.0596	1.84079e-11	3.10983e-10	4.23061	5.63999	759	1745	2.12857	5.09848	3.60675	7.91373
555242	NM_001030082,NM_001030082_dup1	foxp2	forkhead box P2	protein_coding	NP_001025253.1	ZDB-GENE-041203-2	3.06049	2.40758	9.72919e-10	1.34098e-08	3.15241	1.83848	337	92	1.97653	0.559205	3.34913	0.867983
555254	XM_021472895,XM_021481280	itga6l	integrin, alpha 6, like, transcript variant X1	protein_coding	XP_021336955.1	ZDB-GENE-040914-57	-2.87939	0.175418	0.000113737	0.000620552	0.643394	1.39188	24	58	0.142954	0.365874	0.242228	0.5679
555258	NM_001302254	si:dkey-175a17.4	si:dkey-175a17.4	protein_coding	NP_001289183.1	ZDB-GENE-130530-865	2.09938	0.581582	0.00379978	0.0131082	1.55757	0.944198	83	33	0.704222	0.286104	1.19327	0.444084
555285	XM_005168926,XM_005168927,XM_677757	myo1ea	myosin IE, a, transcript variant X3	protein_coding	XP_005168983.1;XP_005168984.1;XP_682849.4	ZDB-GENE-030131-5127	-2.57468	5.78102	1.42264e-10	2.17781e-09	4.98851	6.32492	1313	2827	4.39445	9.86848	7.44617	15.3176
555290	XM_009304520,XM_009304521,XM_017357764	myo10l3	myosin X-like 3, transcript variant X2	protein_coding	XP_009302795.1;XP_009302796.1;XP_017213253.1	ZDB-GENE-070912-237	2.22317	6.50863	4.05635e-08	4.39553e-07	6.98314	5.84437	5360	2016	8.62231	3.37501	14.61	5.2386
555300	XM_001922510	nol4la	nucleolar protein 4-like a	protein_coding	XP_001922545.4	ZDB-GENE-081105-118	2.67326	-0.926908	0.0140563	0.0394753	0.747673	0.324272	29	9	0.103435	0.033943	0.175265	0.052686
555341	XM_009293473,XM_021473240,XM_677831	tspan9a	tetraspanin 9a, transcript variant X1	protein_coding	XP_009291748.1;XP_682923.2	ZDB-GENE-060503-632	-3.90092	1.69855	3.52062e-11	5.77157e-10	1.20872	2.61463	56	183	0.146584	0.499771	0.248377	0.775731
555345	XM_001918606,XM_009296623,XM_009296626	ccdc13	coiled-coil domain containing 13, transcript variant X1	protein_coding	XP_001918641.4;XP_009294898.1;XP_009294901.1	ZDB-GENE-061207-11	2.88453	-0.179574	0.000945626	0.00395808	1.14904	0.505946	52	15	0.197052	0.068724	0.333894	0.106673
555375	XM_677868	nkx3-1	NK3 homeobox 1	protein_coding	XP_682960.4	ZDB-GENE-081104-238	-3.21287	4.38173	5.80336e-14	1.25578e-12	3.44385	5.03369	422	1134	7.69755	21.5387	13.0431	33.4318
555381	XM_021467765,XM_021473241	tmtc2b	transmembrane and tetratricopeptide repeat containing 2b, transcript variant X1	protein_coding	XP_021323440.1	ZDB-GENE-081031-100	-2.41367	2.63944	4.0226e-07	3.7272e-06	2.21088	3.28764	155	313	0.700764	1.47783	1.18741	2.29384
555390	XM_017353958,XM_677883	wu:fc01d11	wu:fc01d11, transcript variant X2	protein_coding	XP_017209447.2;XP_682975.3	ZDB-GENE-030131-2238	2.37343	2.94907	3.01214e-07	2.85697e-06	3.55725	2.469	460	162	0.99813	0.365861	1.69128	0.567879
555400	NM_001025478,XM_005170661,XM_005170662,XM_017354082,XM_017354083	ccdc77	coiled-coil domain containing 77	protein_coding	NP_001020649.1;XP_005170718.1;XP_005170719.1;XP_017209571.1;XP_017209572.1	ZDB-GENE-050913-54	2.30871	3.45383	2.22466e-07	2.14836e-06	4.01769	2.92236	649	235	5.73583	2.14879	9.71906	3.33529
555401	NM_001077598	aoc1	amine oxidase, copper containing 1	protein_coding	NP_001071066.1	ZDB-GENE-061103-112	-12.6308	1.61752	2.66421e-25	1.26779e-23	0.530986	2.73481	19	202	0.107795	1.24328	0.182652	1.92979
555422	XM_021479282	LOC555422	uncharacterized LOC555422	protein_coding	XP_021334957.1	.	4.12177	-1.00469	0.00128011	0.00515401	0.767654	0.224067	30	6	0.152768	0.031729	0.258858	0.049249
555428	NM_001348047,XM_021468067	col28a1a	collagen, type XXVIII, alpha 1a	protein_coding	NP_001334976.1;XP_021323742.1	ZDB-GENE-070705-84	8.56212	4.83877	9.09903e-39	7.22188e-37	5.70308	2.80007	2182	213	6.42475	0.651222	10.8864	1.01081
555430	NM_001170647,NM_001170648,XM_021480468	tmie	transmembrane inner ear	protein_coding	NP_001164118.1;NP_001164119.1;XP_021336143.1	ZDB-GENE-061207-9	3.59888	-0.246796	0.000158433	0.000829142	1.14904	0.417967	52	12	1.16681	0.288027	1.97709	0.447068
555432	XM_005171403,XM_005171404,XM_677932	crema	cAMP responsive element modulator a, transcript variant X2	protein_coding	XP_005171460.1;XP_005171461.1;XP_683024.3	ZDB-GENE-030131-7031	-3.22403	4.0444	1.28901e-13	2.70847e-12	3.13713	4.70859	333	898	1.95118	5.71475	3.30618	8.87027
555436	XM_005170197,XM_677936	cep85l	centrosomal protein 85, like, transcript variant X2	protein_coding	XP_005170254.1;XP_683028.4	ZDB-GENE-041014-309	-2.57961	3.87392	1.81861e-09	2.42862e-08	3.1973	4.46511	349	753	1.59285	3.57514	2.699	5.54924
555443	NM_001109700,XM_005162701	plcd1a	phospholipase C, delta 1a	protein_coding	NP_001103170.1;XP_005162758.1	ZDB-GENE-071004-78	-3.29916	4.9132	5.27098e-15	1.27724e-13	3.90719	5.5609	598	1650	1.96496	5.69798	3.32952	8.84426
555467	XM_005161102,XM_021469028,XM_021469029	specc1lb	sperm antigen with calponin homology and coiled-coil domains 1-like b, transcript variant X3	protein_coding	XP_005161159.1;XP_021324703.1;XP_021324704.1	ZDB-GENE-090423-1	-2.29592	2.87376	8.70001e-07	7.6023e-06	2.43982	3.48095	189	363	0.421549	0.852109	0.714293	1.32262
555473	XM_021471794,XM_677888	adcyap1r1b	adenylate cyclase activating polypeptide 1b (pituitary) receptor type I	protein_coding	XP_021327469.1	ZDB-GENE-110127-1	2.08413	1.90198	0.000126529	0.000684135	2.57636	1.75715	212	85	1.22016	0.501589	2.06751	0.778553
555478	XM_021471856,XM_021477720,XM_677895	si:ch211-106j24.1	si:ch211-106j24.1, transcript variant X1	protein_coding	XP_021333395.1;XP_682987.1	ZDB-GENE-130530-595	-2.60916	0.891343	4.09534e-05	0.000248449	1.00498	1.8609	43	94	0.158066	0.353706	0.267836	0.549012
555479	XM_005160161,XM_009298625	triobpa	TRIO and F-actin binding protein a, transcript variant X2	protein_coding	XP_005160218.1;XP_009296900.1	ZDB-GENE-110411-40	2.51939	2.79104	7.7286e-08	8.04333e-07	3.43451	2.29057	419	139	2.76508	0.973752	4.68529	1.51143
555520	NM_001044334,XM_005164582,XM_009300125,XM_009300126,XM_021475018	ipo8	importin 8	protein_coding	NP_001037799.2;XP_005164639.1;XP_009298400.1;XP_009298401.1;XP_021330693.1	ZDB-GENE-060503-3	2.0282	6.55955	1.09561e-06	9.35988e-06	6.99166	5.98304	5392	2223	22.4155	9.69382	37.9819	15.0465
555526	NM_001030089,NM_001030089_dup1	si:ch211-201h21.5	si:ch211-201h21.5	protein_coding	NP_001025260.2	ZDB-GENE-030131-9599	-3.21382	0.0366479	8.67712e-05	0.000488114	0.554179	1.32895	20	54	0.269109	0.747996	0.455991	1.16102
555531	XM_021468149,XM_697904	si:ch211-152p11.4	si:ch211-152p11.4, transcript variant X2	protein_coding	XP_021323824.1;XP_702996.5	ZDB-GENE-060503-764	-3.69159	1.58462	3.12908e-10	4.60237e-09	1.17919	2.50503	54	167	0.557221	1.821	0.944181	2.82652
555569	XM_021467952,XM_021473220	otogl	otogelin-like, transcript variant X1	protein_coding	XP_021323627.1	ZDB-GENE-050419-93	2.19219	-0.855825	0.0383018	0.089931	0.747673	0.387406	29	11	0.04814	0.018141	0.081571	0.028158
555570	NM_001044336,NM_001044336_dup1,XM_021467656	chtf8	CTF8, chromosome transmission fidelity factor 8 homolog (S. cerevisiae)	protein_coding	NP_001037801.3	ZDB-GENE-050419-148	-2.04186	0.480127	0.00482304	0.0160825	0.918259	1.49581	38	65	0.435332	0.807061	0.737647	1.2527
555576	XM_002665739,XM_009294784	grm1a	glutamate receptor, metabotropic 1a, transcript variant X2	protein_coding	XP_002665785.3;XP_009293059.1	ZDB-GENE-030131-7893	2.1029	4.33205	1.24565e-06	1.05262e-05	4.81814	3.80092	1162	462	3.6488	1.48466	6.18271	2.30445
555583	XM_017353955,XM_017353956,XM_678134	dlec1	deleted in lung and esophageal cancer 1, transcript variant X2	protein_coding	XP_017209444.1;XP_017209445.1;XP_683226.4	ZDB-GENE-091204-65	-3.63793	2.26615	4.81421e-12	8.74414e-11	1.61385	3.0883	88	268	0.24845	0.793465	0.420986	1.23159
555589	NM_001098732	hspb15	heat shock protein, alpha-crystallin-related, b15	protein_coding	NP_001092202.1	ZDB-GENE-080214-5	4.24765	-0.775875	0.00040416	0.00188485	0.882056	0.258248	36	7	0.391028	0.071315	0.662576	0.110693
555606	NM_001007450,NM_001007450_dup1,XM_005159946,XM_005159947	bora	bora, aurora kinase A activator	protein_coding	NP_001007451.1;XP_005160003.1;XP_005160004.1	ZDB-GENE-041114-165	-2.73075	0.121822	0.000341983	0.00163142	0.643394	1.34494	24	55	0.160876	0.403402	0.122142	0.194143
555611	NM_001044790	march2	membrane-associated ring finger (C3HC4) 2	protein_coding	NP_001038255.2	ZDB-GENE-050208-777	-2.32902	0.711539	0.000424717	0.0019685	0.970915	1.69612	41	80	0.370054	0.765451	0.627037	1.18811
555629	NM_001163923,XM_017352782,XM_021468847	ccbe1	collagen and calcium binding EGF domains 1	protein_coding	NP_001157395.1;XP_017208271.1;XP_021324522.1	ZDB-GENE-090506-7	-2.15608	1.78157	7.15001e-05	0.000410667	1.65733	2.49789	92	166	1.03849	1.8031	1.75967	2.79873
555655	NM_001039807	bmpr2b	bone morphogenetic protein receptor, type II b (serine/threonine kinase)	protein_coding	NP_001034896.1	ZDB-GENE-070618-2	-3.29329	1.65551	5.07454e-09	6.39119e-08	1.29386	2.53322	62	171	0.237034	0.68138	0.401642	1.05762
555691	NM_001045549,XM_009291899,XM_017350959,XM_017350960,XM_021481415	kcnj13	potassium inwardly-rectifying channel, subfamily J, member 13	protein_coding	NP_001039014.1;XP_009290174.1;XP_017206448.1;XP_017206449.1;XP_021337090.1	ZDB-GENE-070129-1	28.0746	2.20475	2.8668e-38	2.225e-36	3.28309	0.387406	373	11	1.28412	0.036224	2.17588	0.056225
555703	NM_001161750,NM_001161750_dup1,XM_021468422	map3k5	mitogen-activated protein kinase kinase kinase 5	protein_coding	NP_001155222.1	ZDB-GENE-030827-3	2.04471	5.33162	1.31239e-06	1.10636e-05	5.78133	4.77649	2306	943	7.41666	2.97259	6.08683	3.43286
555717	NM_001079833	m17	IL-6 subfamily cytokine M17	protein_coding	NP_001073302.1	ZDB-GENE-060526-368	4.25855	-0.970111	0.000857787	0.00364702	0.787362	0.224067	31	6	0.641132	0.118246	1.08636	0.183538
555728	XM_021478845,XM_021478846,XM_021478847,XM_021478848,XM_021478849,XM_021478850	carf	calcium responsive transcription factor, transcript variant X4	protein_coding	XP_021334520.1;XP_021334521.1;XP_021334522.1;XP_021334523.1;XP_021334524.1;XP_021334525.1	ZDB-GENE-070912-172	2.42371	5.34949	2.55051e-09	3.33198e-08	5.87353	4.63082	2461	849	13.2858	4.68673	22.5121	7.27462
555753	NM_001030094,NM_001030094_dup1,NM_001030094_dup2	znf1005	zinc finger protein 1005	protein_coding	NP_001025265.3	ZDB-GENE-050913-136	-2.0763	0.0214265	0.00957164	0.0287149	0.706862	1.21174	27	47	0.215813	0.432876	0.365684	0.577856
555766	NM_001037375,XM_005158213,XR_001795962	etv2	ets variant 2	protein_coding	NP_001032452.1;XP_005158270.1	ZDB-GENE-050622-14	2.26905	0.888802	0.000387717	0.00181906	1.79998	1.06498	106	39	1.12576	0.360491	1.90754	0.559544
555788	NM_001030095,XM_005164583	srgap1b	SLIT-ROBO Rho GTPase activating protein 1b	protein_coding	NP_001025266.1;XP_005164640.1	ZDB-GENE-041210-103	2.31184	2.54094	2.1185e-06	1.72239e-05	3.17503	2.16106	343	124	0.960707	0.361766	1.62787	0.561524
555791	NM_001089574,NM_001089574_dup1,XM_005171869,XM_005171870	zgc:162952	zgc:162952	protein_coding	NP_001083043.1;XP_005171926.1;XP_005171927.1	ZDB-GENE-070424-98	-5.32149	4.26281	5.36892e-25	2.51502e-23	2.82067	5.05694	259	1153	1.65684	7.67535	2.80742	11.9135
555793	XM_005168774,XM_021477267,XM_021477268,XM_678412,XR_002459113	LOC555793	protein FAM107B, transcript variant X3	protein_coding	XP_005168831.2;XP_683504.5	.	2.116	6.51459	2.50804e-07	2.40765e-06	6.96676	5.8982	5299	2094	27.8226	11.6254	47.144	18.0447
555797	NM_001199994	cdkn2c	cyclin-dependent kinase inhibitor 2C (p18, inhibits CDK4)	protein_coding	NP_001186923.1	ZDB-GENE-081104-145	2.14604	1.97959	5.17684e-05	0.000305941	2.65356	1.79257	226	88	1.95783	0.789654	3.31745	1.22568
555840	XM_678484,XR_002459479,XR_002459480	pdk1	pyruvate dehydrogenase kinase, isozyme 1, transcript variant X3	protein_coding	XP_683576.2	ZDB-GENE-091204-402	-4.62014	6.50413	1.92115e-24	8.74623e-23	5.05708	7.23077	1379	5328	3.90643	16.2848	6.61924	25.2768
555846	XM_678490	armc2	armadillo repeat containing 2	protein_coding	XP_683582.4	ZDB-GENE-041014-7	2.00434	0.968913	0.00256903	0.00935175	1.81926	1.17643	108	45	0.445009	0.189353	0.754044	0.293909
555865	NM_001082801,NM_001082801_dup1	zgc:162297	zgc:162297	protein_coding	NP_001076270.1	ZDB-GENE-070410-62	-2.4318	0.0640792	0.00159636	0.00623282	0.664862	1.27988	25	51	0.302419	0.664841	0.366174	1.03195
555911	XM_009292394	npr1b	natriuretic peptide receptor 1b	protein_coding	XP_009290669.2	ZDB-GENE-100805-4	2.15867	0.909928	0.000995102	0.00414127	1.79998	1.10309	106	41	0.372438	0.150679	0.631077	0.23388
555939	NM_001297676	avpr1ab	arginine vasopressin receptor 1Ab	protein_coding	NP_001284605.1	ZDB-GENE-041210-105	-5.21409	-0.857585	6.40444e-05	0.000371701	0.218988	0.90158	7	31	0.072421	0.37924	0.122713	0.588645
555941	NM_001114548,XM_009301497,XM_009301500,XM_009301501,XM_009301504,XM_009301505,XM_017356095,XM_017356096,XM_017356097,XM_021476173,XM_021476174,XM_021476175,XM_021476176,XM_021476178,XM_021476179,XM_021476180,XM_021476181,XM_021476182,XR_002458764	cacna1ba	calcium channel, voltage-dependent, N type, alpha 1B subunit, a	protein_coding	NP_001108020.1;XP_009299772.1;XP_009299775.1;XP_009299776.1;XP_009299779.1;XP_009299780.1;XP_017211584.1;XP_017211585.1;XP_017211586.1;XP_021331848.1;XP_021331849.1;XP_021331850.1;XP_021331851.1;XP_021331853.1;XP_021331854.1;XP_021331855.1;XP_021331856.1;XP_021331857.1	ZDB-GENE-060531-44	2.35358	4.07334	3.92712e-08	4.26648e-07	4.61669	3.45908	1005	357	1.62045	0.616325	2.74577	0.956642
555945	XM_009302661,XM_021477264,XM_021477265,XM_678606	camk1a	calcium/calmodulin-dependent protein kinase Ia, transcript variant X1	protein_coding	XP_009300936.3;XP_683698.3	ZDB-GENE-131120-147	11.5258	-1.20546	2.84737e-05	0.000179015	0.747673	0.0786196	29	2	0.258733	0.018867	0.438409	0.029285
555952	XM_021479000,XM_678615	si:dkey-3d4.3	si:dkey-3d4.3, transcript variant X1	protein_coding	XP_021334675.1;XP_683707.1	ZDB-GENE-070912-527	-2.7387	-0.126401	0.000899245	0.00379766	0.554179	1.19419	20	46	0.181526	0.44783	0.307586	0.69511
555955	NM_001110518,NM_001110518_dup1,NM_001110518_dup2	cand2	cullin-associated and neddylation-dissociated 2 (putative)	protein_coding	NP_001103988.1	ZDB-GENE-060503-645	5.58184	-0.906529	9.82733e-05	0.000545234	0.844921	0.189057	34	5	0.141821	0.021127	0.026681	0.00912
555957	XM_021469640,XM_021469641,XM_021469642,XM_021469643,XM_021469644,XM_021469645	ephb3b	eph receptor B3b, transcript variant X6	protein_coding	XP_021325315.1;XP_021325316.1;XP_021325317.1;XP_021325318.1;XP_021325319.1;XP_021325320.1	ZDB-GENE-100811-1	-3.60701	3.17612	3.09029e-14	6.83471e-13	2.29589	3.9178	167	504	0.8046	2.74625	1.36335	4.26266
555962	NM_001030096,XM_021469810,XM_021469811	tgm1l4	transglutaminase 1 like 4	protein_coding	NP_001025267.1;XP_021325485.1;XP_021325486.1	ZDB-GENE-050913-29	4.11366	3.08054	4.87051e-16	1.28447e-14	3.85679	2.0964	576	117	3.07174	0.586255	5.2049	0.909969
555969	NM_001044341,XM_005170036,XM_009294214,XM_021468072	lpcat1	lysophosphatidylcholine acyltransferase 1	protein_coding	NP_001037806.2;XP_005170093.1;XP_009292489.1;XP_021323747.1	ZDB-GENE-060503-915	-5.30544	4.64273	9.04491e-26	4.39357e-24	3.15621	5.42645	338	1500	2.22267	11.2566	3.76619	17.4721
555983	XR_002457318,XR_002459695	sox13	SRY (sex determining region Y)-box 13, transcript variant X2	misc_RNA	.	ZDB-GENE-100519-1	-2.11047	4.6067	7.82225e-07	6.89256e-06	4.05678	5.08815	668	1179	1.952	3.58345	3.30756	5.56214
556126	XM_009291903,XM_678858	gal3st2	galactose-3-O-sulfotransferase 2, transcript variant X2	protein_coding	XP_009290178.1;XP_683950.6	ZDB-GENE-131127-533	5.25067	1.06691	1.35549e-11	2.31788e-10	2.136	0.717283	145	23	0.75625	0.125244	1.28143	0.194401
556132	NM_001044795,XM_005159676	smap2	small ArfGAP2	protein_coding	NP_001038260.1;XP_005159733.1	ZDB-GENE-060503-374	-3.78184	0.995719	1.34108e-08	1.57404e-07	0.863608	2.03858	35	111	0.242157	0.916674	0.410322	1.42284
556154	NM_001130397,XM_005165471	mamdc2a	MAM domain containing 2a	protein_coding	NP_001123869.1;XP_005165528.1	ZDB-GENE-060526-16	-2.77837	3.28119	5.44632e-10	7.761e-09	2.61547	3.9311	219	509	1.6273	3.9818	2.75737	6.18044
556156	NM_001034969,NM_001034969_dup1	slc5a8l	solute carrier family 5 (iodide transporter), member 8-like	protein_coding	NP_001030141.1	ZDB-GENE-061110-98	-13.9967	-0.112871	4.72798e-12	8.60983e-11	0.159737	1.42235	5	60	0.029655	0.428737	0	0.049639
556193	NM_001145563,XM_017354910	sgms2	sphingomyelin synthase 2	protein_coding	NP_001139035.1;XP_017210399.1	ZDB-GENE-070730-2	-3.14642	1.62889	2.19449e-08	2.47489e-07	1.30757	2.49789	63	166	0.572163	1.73541	0.9695	2.69366
556202	XM_009307208,XM_017358953	si:dkey-155h10.3	si:dkey-155h10.3, transcript variant X2	protein_coding	XP_009305483.1;XP_017214442.1	ZDB-GENE-141215-66	-2.89461	-1.13659	0.0120982	0.0347935	0.275901	0.692498	9	22	0.040451	0.109879	0.068542	0.170551
556226	NM_001039923,NM_001039923_dup1,XM_021469812,XM_021469813,XM_021469814	cdc42l2	cell division cycle 42 like 2	protein_coding	NP_001035012.1	ZDB-GENE-060312-21	3.62268	0.643977	7.76786e-07	6.85325e-06	1.74057	0.717283	100	23	0.830567	0.177161	0.430336	0.124804
556245	NM_001128235	si:dkey-20d21.12	si:dkey-20d21.12	protein_coding	NP_001121707.1	ZDB-GENE-081104-365	2.63248	-0.567826	0.00557603	0.0182056	0.918259	0.417967	38	12	0.480494	0.147922	0.814171	0.2296
556251	XM_009302646,XM_679004	cntn3b	contactin 3b, transcript variant X2	protein_coding	XP_009300921.1;XP_684096.6	ZDB-GENE-130530-645	-2.50091	0.38993	0.000535268	0.00242322	0.787362	1.49581	31	65	0.114923	0.250841	0.194731	0.389349
556280	NM_001145564,XM_021474923	cyp2u1	cytochrome P450, family 2, subfamily U, polypeptide 1	protein_coding	NP_001139036.1;XP_021330598.1	ZDB-GENE-070730-1	-2.83676	0.423509	6.29184e-05	0.000366278	0.747673	1.55201	29	69	0.255352	0.57766	0.432681	0.896628
556282	XM_009305291,XM_009305292	slc46a3	solute carrier family 46, member 3, transcript variant X1	protein_coding	XP_009303566.1;XP_009303567.1	ZDB-GENE-100105-2	3.17031	-0.495246	0.000844689	0.00360665	0.988048	0.387406	42	11	0.283956	0.072514	0.481149	0.112554
556288	NM_001327835	fbxo28	F-box protein 28	protein_coding	NP_001314764.1	ZDB-GENE-030131-4665	-2.00035	2.37927	9.79889e-05	0.000544349	2.15129	2.97982	147	246	0.909975	1.59045	1.54191	2.46866
556322	NM_001110023,NM_001110023_dup1,NM_001110023_dup2,XM_005168768	zgc:162324	zgc:162324	protein_coding	NP_001103493.1	ZDB-GENE-070410-73	2.54743	-0.13635	0.00257631	0.00937501	1.14904	0.561752	52	17	0.327966	0.117845	0.100952	0
556341	NM_001083545,XM_021474930,XR_002458102,XR_002458104	mhc1zca	major histocompatibility complex class I ZCA	protein_coding	NP_001077014.1;XP_021330605.1	ZDB-GENE-070424-4	-6.09264	0.358085	4.86892e-10	6.97887e-09	0.434294	1.65822	15	77	0.101436	0.543135	0.171878	0.843039
556374	NM_001044345,XM_005173958,XM_009296103	si:dkey-102c8.3	si:dkey-102c8.3	protein_coding	NP_001037810.1;XP_005174015.1;XP_009294378.1	ZDB-GENE-050208-328	-3.34472	2.12321	1.4095e-10	2.16394e-09	1.58035	2.93826	85	238	0.510185	1.61125	0.864482	2.50094
556393	NM_001076557	dhrs12	dehydrogenase/reductase (SDR family) member 12	protein_coding	NP_001070025.1	ZDB-GENE-060929-1134	-2.29277	3.7163	1.6315e-07	1.59829e-06	3.16377	4.26741	340	652	3.33822	6.6785	5.65644	10.3662
556406	XM_005172017,XM_009301892,XM_021476654,XM_021476655,XM_021476656,XM_679197	clip2	CAP-GLY domain containing linker protein 2, transcript variant X2	protein_coding	XP_021332329.1;XP_021332330.1;XP_021332331.1	ZDB-GENE-100727-3	-3.45988	4.30132	2.31543e-15	5.74975e-14	3.29691	4.97966	377	1091	1.31897	4.05547	2.23493	6.2948
556480	NM_001126386	slc6a6a	novel protein similar to vertebrate solute carrier family 6 (neurotransmitter transporter, taurine), member 6 (SLC6A6)	protein_coding	NP_001119858.1	ZDB-GENE-081104-1	-2.14868	0.599578	0.00186426	0.0071086	0.953575	1.59276	40	72	0.235641	0.441996	0.399282	0.686055
556489	NM_001044349,XM_009303217,XM_009303219,XM_009303221,XM_021477538,XM_021477539,XM_021477540,XM_021477541,XM_021477544,XR_002459139	mybpc3	myosin binding protein C, cardiac	protein_coding	NP_001037814.2;XP_009301492.1;XP_009301494.1;XP_009301496.1;XP_021333213.1;XP_021333214.1;XP_021333215.1;XP_021333216.1;XP_021333219.1	ZDB-GENE-070112-2362	10.7963	1.36454	4.29858e-20	1.53501e-18	2.4767	0.505946	195	15	0.68351	0.054221	1.15817	0.08416
556522	NM_001077551	agmat	agmatine ureohydrolase (agmatinase)	protein_coding	NP_001071019.1	ZDB-GENE-060929-696	-3.12407	0.523723	1.04781e-05	7.2929e-05	0.747673	1.64537	29	76	0.307991	0.849139	0.521875	1.31801
556528	NM_001030101,XM_005173961,XM_009296105	rdh5	retinol dehydrogenase 5 (11-cis/9-cis)	protein_coding	NP_001025272.1;XP_005174018.1;XP_009294380.1	ZDB-GENE-050208-411	3.12646	2.76094	7.83571e-11	1.2373e-09	3.48063	2.08693	434	116	4.05893	1.12659	6.87764	1.74866
556540	NM_001326382,NM_001326382_dup1,NM_001326382_dup2	fam129bb	family with sequence similarity 129, member Bb	protein_coding	NP_001313311.1	ZDB-GENE-030131-6218	-2.06533	2.17783	6.39442e-05	0.000371325	1.97346	2.81737	125	216	0.932084	1.68125	0.973534	1.26644
556551	XM_005172940,XM_017358378,XM_021479922,XM_679378	shroom2b	shroom family member 2b, transcript variant X1	protein_coding	XP_005172997.2;XP_017213867.2;XP_021335597.1;XP_684470.7	ZDB-GENE-130819-2	-2.03618	6.11671	1.05953e-06	9.09968e-06	5.54491	6.55502	1951	3322	6.52856	11.6988	11.0623	18.1585
556575	NM_001135971	lratb.2	lecithin retinol acyltransferase b, tandem duplicate 2	protein_coding	NP_001129443.1	ZDB-GENE-081022-106	2.40787	1.7286	9.34998e-06	6.6148e-05	2.48276	1.53816	196	68	3.6919	1.32392	6.25573	2.05495
556592	NM_001044807,XM_005160696	nbas	neuroblastoma amplified sequence	protein_coding	NP_001038272.1;XP_005160753.1	ZDB-GENE-041014-367	-2.47945	2.84087	1.00603e-07	1.02668e-06	2.34991	3.48095	175	363	0.332603	0.720053	0.563578	1.11765
556601	NM_001077372,XM_017353833	slc22a13b	solute carrier family 22 member 13b	protein_coding	NP_001070840.2;XP_017209322.1	ZDB-GENE-061013-532	-3.11661	0.368592	1.67344e-05	0.000111138	0.686014	1.53816	26	68	0.159178	0.464795	0.269718	0.721442
556608	NM_001098734,XM_017357974,XM_021479179	kcnj1b	potassium inwardly-rectifying channel, subfamily J, member 1b	protein_coding	NP_001092204.1;XP_017213463.1;XP_021334854.1	ZDB-GENE-070620-9	16.6648	2.0246	5.22464e-31	3.15776e-29	3.0903	0.534119	321	16	2.43982	0.102507	4.13415	0.159109
556612	NM_001123237	serpine3	serpin peptidase inhibitor, clade E (nexin, plasminogen activator inhibitor type 1), member 3	protein_coding	NP_001116709.1	ZDB-GENE-050309-223	2.69158	5.92988	1.96636e-11	3.30604e-10	6.48858	5.08696	3792	1178	31.5234	10.1965	53.4148	15.8268
556619	NM_001048063	chrna4b	cholinergic receptor, nicotinic, alpha 4b	protein_coding	NP_001041528.1	ZDB-GENE-090505-3	-4.91634	0.702883	5.48727e-10	7.80349e-09	0.621602	1.87198	23	95	0.156808	0.672021	0.265703	1.04309
556628	XM_005156418	zgc:111868	zgc:111868	protein_coding	XP_005156475.1	ZDB-GENE-050809-138	-8.02851	4.8628	1.88737e-37	1.42795e-35	2.89522	5.72035	275	1847	0.995389	6.96845	1.68664	10.8162
556640	XM_021472394,XM_021474227,XM_679489	si:ch211-69b7.6	si:ch211-69b7.6	protein_coding	XP_021328069.1	ZDB-GENE-141212-266	-9.94995	6.74599	7.1983e-48	7.76419e-46	4.36455	7.61504	837	6965	1.08418	9.9886	1.83709	15.504
556668	XM_009297401,XM_009297402,XM_021470307,XM_021470308,XM_021470309,XM_021470310,XR_659821	LOC556668	xin actin-binding repeat-containing protein 1-like, transcript variant X6	protein_coding	XP_009295676.1;XP_009295677.1;XP_021325982.1;XP_021325983.1;XP_021325984.1;XP_021325985.1	.	-4.80181	3.51608	1.2263e-20	4.55702e-19	2.30276	4.31487	168	675	1.19013	2.83382	2.01662	4.39858
556684	NM_001039828	slc15a2	solute carrier family 15 (oligopeptide transporter), member 2	protein_coding	NP_001034917.1	ZDB-GENE-030131-5866	-2.54056	1.86498	1.4947e-06	1.24705e-05	1.60276	2.62776	87	185	0.41269	0.923178	0.699282	1.43293
556703	NM_001201540,NM_001201540_dup1,NM_001201541,NM_001201541_dup1,NM_001201542,NM_001201542_dup1,XM_009299964,XM_021475025,XM_021475026,XM_021475027,XM_021475028,XM_021475029,XM_021475030,XM_021475031	tnnt2e	troponin T2e, cardiac	protein_coding	NP_001188469.1;NP_001188470.1;NP_001188471.1	ZDB-GENE-041210-27	-4.04229	3.55799	2.97587e-17	8.59773e-16	2.50078	4.31081	199	673	1.88326	7.57006	0.545376	4.95231
556707	XM_679576	LOC556707	protein MB21D2	protein_coding	XP_684668.2	.	-10.7466	0.1904	1.96565e-12	3.70462e-11	0.247725	1.60609	8	73	0.033111	0.35499	0.056105	0.551006
556728	NM_001079676,XM_005160336	il20ra	interleukin 20 receptor, alpha	protein_coding	NP_001073144.2;XP_005160393.1	ZDB-GENE-040724-249	5.27049	1.88143	1.85268e-15	4.62248e-14	2.82067	1.10309	259	41	1.5227	0.246026	2.58014	0.381875
556743	NM_001199365,XM_009292336,XM_009292337,XM_009292338,XM_021466695	sema6e	sema domain, transmembrane domain (TM), and cytoplasmic domain, (semaphorin) 6E	protein_coding	NP_001186294.1;XP_009290611.1;XP_009290612.1;XP_009290613.1;XP_021322370.1	ZDB-GENE-040724-119	-3.22658	5.12183	1.07261e-14	2.50948e-13	4.12614	5.75816	703	1897	1.98401	5.91287	3.3618	9.1778
556752	XM_021468203	itgb8	integrin, beta 8	protein_coding	XP_021323878.1	ZDB-GENE-071213-3	-5.64342	-0.433815	2.31642e-06	1.86743e-05	0.275901	1.14023	9	43	0.054866	0.297361	0.092967	0.461556
556760	NM_001044352,XM_005159260	daw1	dynein assembly factor with WDR repeat domains 1	protein_coding	NP_001037817.1;XP_005159317.1	ZDB-GENE-050419-255	2.68731	0.548484	0.000120611	0.000654326	1.60276	0.812372	87	27	0.797555	0.256456	1.35142	0.398064
556781	NM_001099417	tdh2	L-threonine dehydrogenase 2	protein_coding	NP_001092887.1	ZDB-GENE-070620-14	3.25391	9.47132	5.83513e-16	1.52082e-14	10.0859	8.38668	46369	11916	293.259	78.4698	496.911	121.799
556794	NM_001256764,XM_017353579,XR_659675	ttll9	tubulin tyrosine ligase-like family, member 9	protein_coding	NP_001243693.1;XP_017209068.1	ZDB-GENE-030131-1582	2.00767	1.52954	0.000614476	0.00272491	2.25401	1.52418	161	67	1.15354	0.500639	1.95461	0.777078
556849	XM_679770	entpd5a	ectonucleoside triphosphate diphosphohydrolase 5a	protein_coding	XP_684862.2	ZDB-GENE-100419-1	2.76501	-0.894068	0.0100683	0.029881	0.767654	0.324272	30	9	0.111363	0.034158	0.188699	0.053019
556894	NM_001030105,XM_005164535,XM_017355023,XM_021475033	tfec	transcription factor EC	protein_coding	NP_001025276.2;XP_005164592.1;XP_017210512.1;XP_021330708.1	ZDB-GENE-041210-21	2.0269	1.40637	0.000638054	0.00281996	2.15887	1.43734	148	61	0.911173	0.596851	1.54394	0.926417
556898	XM_017351207	meox2a	mesenchyme homeobox 2a	protein_coding	XP_017206696.1	ZDB-GENE-080613-1	3.45627	1.17553	4.53722e-08	4.87143e-07	2.136	0.985592	145	35	0.417096	0.102363	0.706747	0.158885
556899	XM_009297668	si:ch211-276f18.2	si:ch211-276f18.2	protein_coding	XP_009295943.1	ZDB-GENE-091118-89	-2.50685	-0.282876	0.00397843	0.0136506	0.530986	1.08416	19	40	0.090736	0.202766	0.153748	0.314729
556903	NM_001287077,NM_001287077_dup1,NM_001287077_dup2,XM_009305863	socs7	suppressor of cytokine signaling 7	protein_coding	NP_001274006.1	ZDB-GENE-080204-125	2.11328	2.96852	8.26177e-06	5.90853e-05	3.52826	2.58126	450	178	2.1029	0.874412	2.61723	1.35724
556915	NM_001079963	vezf1b	vascular endothelial zinc finger 1b	protein_coding	NP_001073432.1	ZDB-GENE-060825-121	-2.31092	-0.510059	0.0112329	0.0326516	0.48345	0.944198	17	33	0.157675	0.320644	0.267172	0.497694
556956	NM_001034972,XM_005172596,XM_009305081	pi4kaa	phosphatidylinositol 4-kinase, catalytic, alpha a	protein_coding	NP_001030144.1;XP_005172653.1;XP_009303356.1	ZDB-GENE-100204-2	-3.28013	3.81894	1.15032e-13	2.42918e-12	2.92221	4.49766	281	771	0.593042	1.70061	1.00488	2.63964
556973	XM_679925	txndc16	thioredoxin domain containing 16	protein_coding	XP_685017.4	ZDB-GENE-100712-1	2.08172	3.91084	2.8332e-06	2.24617e-05	4.40817	3.42186	864	347	4.1283	1.72574	6.99519	2.67865
556980	NM_001346162,NM_001346162_dup1,XM_021480592	sdccag8	serologically defined colon cancer antigen 8	protein_coding	NP_001333091.1;XP_021336267.1	ZDB-GENE-090313-318	3.01964	2.52598	9.30892e-10	1.28982e-08	3.25506	1.93673	365	101	2.24529	0.642672	2.12449	0.664377
557014	XM_021478854,XM_679972	als2a	amyotrophic lateral sclerosis 2a (juvenile)	protein_coding	XP_685064.6	ZDB-GENE-070402-2	-2.49586	0.879138	9.08383e-05	0.00050963	1.02172	1.83848	44	92	0.107218	0.231673	0.181674	0.359597
557041	XM_003199620,XM_021480364	si:ch211-225b10.3	si:ch211-225b10.3	protein_coding	XP_021336039.1	ZDB-GENE-130531-53	3.51377	0.882754	3.31622e-07	3.125e-06	1.91195	0.835197	118	28	1.18481	0.282193	2.00761	0.438012
557044	XM_009307513,XM_009307514,XM_009307515,XM_021472734	si:ch211-69e5.1	si:ch211-69e5.1, transcript variant X4	protein_coding	XP_021328409.1	ZDB-GENE-090313-130	5.81426	0.502889	6.47618e-10	9.11126e-09	1.7202	0.477211	98	14	0.195451	0.022877	0.331182	0.035509
557050	NM_001135552	si:dkey-19a16.4	si:dkey-19a16.4	protein_coding	NP_001129024.1	ZDB-GENE-050208-652	5.51657	2.81189	2.41025e-20	8.72544e-19	3.67301	1.64537	502	76	2.09192	0.327064	3.54464	0.507661
557061	NM_001039627,XM_021468430	igf2r	insulin-like growth factor 2 receptor	protein_coding	NP_001034716.1;XP_021324105.1	ZDB-GENE-041014-300	-2.6768	3.02278	4.76141e-09	6.01481e-08	2.43358	3.67689	188	421	0.328964	0.822981	0.557412	1.27741
557104	NM_001075111,NM_001331156,XM_017353837,XM_021470189	hnf4g	hepatocyte nuclear factor 4, gamma	protein_coding	NP_001068579.2;NP_001318085.1;XP_017209326.1;XP_021325864.1	ZDB-GENE-060929-100	-5.17368	0.566288	6.26118e-10	8.83835e-09	0.554179	1.78086	20	87	0.13015	0.766335	0.220532	1.18948
557111	NM_001081439	hs3st1l1	heparan sulfate (glucosamine) 3-O-sulfotransferase 1-like1	protein_coding	NP_001074908.1	ZDB-GENE-070202-2	-2.13189	-0.433902	0.020365	0.0536254	0.530986	0.965043	19	34	0.314955	0.573497	0.533674	0.890166
557144	NM_001089499,XM_005162706,XM_005162707	zgc:162928	zgc:162928	protein_coding	NP_001082968.1;XP_005162763.1;XP_005162764.1	ZDB-GENE-070410-112	2.66337	1.15344	1.38572e-05	9.39885e-05	2.04887	1.12178	134	42	0.67669	0.216836	1.14661	0.336568
557166	NM_001089494	acmsd	aminocarboxymuconate semialdehyde decarboxylase	protein_coding	NP_001082963.1	ZDB-GENE-070410-103	-2.43527	-0.0493951	0.00287911	0.0103145	0.621602	1.21174	23	47	0.226903	0.476563	0.384475	0.739709
557168	NM_001089375	si:dkey-240e12.6	si:dkey-240e12.6	protein_coding	NP_001082844.1	ZDB-GENE-050208-367	-62.3367	3.58151	5.19086e-71	1.08098e-68	0.459082	4.61771	16	841	0.441476	25.6657	0.748058	39.8376
557185	NM_001099447,XM_005165493	slc25a35	solute carrier family 25, member 35	protein_coding	NP_001092917.1;XP_005165550.1	ZDB-GENE-060526-142	-3.05553	0.177449	4.89418e-05	0.000291861	0.621602	1.4072	23	59	0.24076	0.777459	0.407956	1.20675
557187	NM_001075112,NM_001075112_dup1	tmem5	transmembrane protein 5	protein_coding	NP_001068580.1	ZDB-GENE-060929-1018	-2.91989	0.832657	5.84812e-06	4.32806e-05	0.918259	1.84973	38	93	0.376948	0.960851	0.469177	0.254746
557207	NM_001326530,XM_005158288	si:ch211-135n15.2	si:ch211-135n15.2	protein_coding	NP_001313459.1;XP_005158345.1	ZDB-GENE-131121-526	3.32824	0.056413	6.4413e-05	0.000373326	1.32116	0.534119	64	16	0.830591	0.197156	1.40739	0.30602
557221	NM_001137658,XM_009296245	frem1b	Fras1 related extracellular matrix 1b	protein_coding	NP_001131130.1;XP_009294520.1	ZDB-GENE-050208-783	3.02995	2.50116	9.39291e-10	1.29974e-08	3.23367	1.91547	359	99	0.786571	0.225692	1.3328	0.350313
557230	NM_001082810,XM_009300393	si:ch211-244b2.3	si:ch211-244b2.3	protein_coding	NP_001076279.1;XP_009298668.1	ZDB-GENE-030131-4737	-2.29037	3.39961	2.79854e-07	2.66222e-06	2.88611	3.96771	273	523	2.16666	4.31791	3.6713	6.70214
557258	XM_005158577,XM_005158579,XM_021467276	ptk2ba	protein tyrosine kinase 2 beta, a, transcript variant X2	protein_coding	XP_005158634.1;XP_005158636.1;XP_021322951.1	ZDB-GENE-080207-1	18.0937	2.64723	7.32279e-39	5.85628e-37	3.6677	0.717283	500	23	2.43443	0.109619	4.12501	0.170147
557269	XM_680306	pdzd3a	PDZ domain containing 3a	protein_coding	XP_685398.3	ZDB-GENE-080430-1	-3.07613	1.5112	6.07737e-08	6.42661e-07	1.25192	2.39412	59	152	0.254571	0.684438	0.431356	1.06237
557275	NM_001044823	cx39.4	connexin 39.4	protein_coding	NP_001038288.1	ZDB-GENE-050616-6	-2.26622	0.935927	0.00030684	0.00148226	1.1026	1.84973	49	93	0.72769	1.45147	1.23303	2.25293
557278	NM_001044824,XM_005160501,XM_009294640,XM_009294641,XM_009294642,XM_009294643	ppp1r13bb	protein phosphatase 1, regulatory subunit 13Bb	protein_coding	NP_001038289.2;XP_005160558.1;XP_009292915.1;XP_009292916.1;XP_009292917.1;XP_009292918.1	ZDB-GENE-030131-4327	3.21496	8.35173	1.28229e-15	3.23774e-14	8.96358	7.28514	21277	5534	66.5166	17.7222	112.709	27.508
557285	XM_009296343,XM_680322	hcn2b	hyperpolarization activated cyclic nucleotide-gated potassium channel 2b, transcript variant X1	protein_coding	XP_009294618.1;XP_685414.3	ZDB-GENE-030131-8228	2.09731	3.93047	2.13443e-06	1.734e-05	4.43027	3.43313	878	350	3.51767	1.46112	5.96051	2.2679
557290	XM_009297929,XM_021470646,XM_021470647,XM_021470648,XM_021470649,XM_021470650,XM_021470651,XM_021470652,XM_021470653,XM_021470654,XM_021470655,XM_021474566,XM_021474567,XM_021474568,XM_021474569	nav2b	neuron navigator 2b, transcript variant X11	protein_coding	XP_009296204.1;XP_021326321.1;XP_021326322.1;XP_021326323.1;XP_021326324.1;XP_021326325.1;XP_021326326.1;XP_021326327.1;XP_021326328.1;XP_021326329.1;XP_021326330.1	ZDB-GENE-061207-13	2.0596	4.47633	2.06994e-06	1.68552e-05	4.94858	3.95474	1276	518	2.2832	0.950067	3.86877	1.47467
557314	XM_005155891,XM_009306229	card19	caspase recruitment domain family, member 19, transcript variant X2	protein_coding	XP_005155948.1;XP_009304504.1	ZDB-GENE-041008-5	-2.05141	3.31756	8.92444e-06	6.34022e-05	2.90878	3.84375	278	477	1.74001	3.08991	2.94835	4.79608
557356	XM_009299740,XM_009299741	mkl2b	MKL/myocardin-like 2b, transcript variant X1	protein_coding	XP_009298015.1;XP_009298016.1	ZDB-GENE-030619-16	-2.35734	3.64796	6.54313e-08	6.87764e-07	3.07835	4.21399	318	627	0.80308	1.67275	1.36078	2.5964
557384	NM_001130614	fzd1	frizzled class receptor 1	protein_coding	NP_001124086.1	ZDB-GENE-990415-219	-2.34253	0.184794	0.00166818	0.00647238	0.727412	1.34494	28	55	0.252797	0.519144	0.428351	0.805802
557394	XM_021471239,XM_680463	gpr78a	G protein-coupled receptor 78a	protein_coding	XP_685555.2	ZDB-GENE-110411-251	2.08868	1.58836	0.000263387	0.00129556	2.31639	1.53816	170	68	1.34875	0.558916	2.28539	0.867535
557419	XM_680487	epdl2	ependymin-like 2	protein_coding	XP_685579.4	ZDB-GENE-091204-250	-10.1944	3.97796	2.86076e-40	2.39722e-38	1.92979	4.89121	120	1024	2.21766	19.8095	3.75771	30.7478
557421	XM_009296341,XM_009296342,XM_680490	cbarpb	calcium channel, voltage-dependent, beta subunit associated regulatory protein b, transcript variant X2	protein_coding	XP_009294616.1;XP_009294617.1;XP_685582.5	ZDB-GENE-050208-507	4.94953	0.733234	2.00558e-09	2.65471e-08	1.86635	0.615481	113	19	0.461075	0.078012	0.781268	0.121088
557468	XM_017351845,XM_021473212	pgfb	placental growth factor b, transcript variant X2	protein_coding	XP_021328887.1	ZDB-GENE-131127-445	-2.045	0.0576586	0.0108903	0.0318355	0.727412	1.22908	28	48	0.157289	0.36548	0.266519	0.567288
557500	NM_001123241,XM_005166733	nr1h5	nuclear receptor subfamily 1, group H, member 5	protein_coding	NP_001116713.1;XP_005166790.1	ZDB-GENE-080403-3	-2.4318	0.0640792	0.00159636	0.00623282	0.664862	1.27988	25	51	0.178835	0.424883	0.303027	0.659491
557511	XM_009306536,XM_021480270,XM_680591	grid1b	glutamate receptor, ionotropic, delta 1b, transcript variant X3	protein_coding	XP_009304811.1;XP_021335945.1;XP_685683.4	ZDB-GENE-121214-84	2.21575	1.66648	6.52444e-05	0.000377209	2.40197	1.55201	183	69	0.602279	0.229885	1.02053	0.356821
557513	XM_005173035	herc4	HECT and RLD domain containing E3 ubiquitin protein ligase 4	protein_coding	XP_005173092.1	ZDB-GENE-070801-1	-9.28878	3.44238	6.25947e-35	4.28845e-33	1.63575	4.36475	90	700	0.389492	3.18484	0.659974	4.94343
557518	XM_680598	tkta	transketolase a	protein_coding	XP_685690.2	ZDB-GENE-130530-578	-2.21269	7.16491	4.04586e-08	4.38642e-07	6.49683	7.63388	3814	7057	24.3443	46.9155	41.2501	72.821
557525	NM_001044829,NM_001044829_dup1	si:dkey-239i20.2	si:dkey-239i20.2	protein_coding	NP_001038294.1	ZDB-GENE-041001-98	-3.4369	0.472567	2.46026e-06	1.97281e-05	0.686014	1.63239	26	75	0.169776	0.521291	0.287677	0.809134
557537	XM_009303593	LOC557537	zinc finger protein 239-like	protein_coding	XP_009301868.1	.	-2.01202	3.12325	2.13618e-05	0.000138332	2.75713	3.65461	246	414	1.33442	2.34083	2.26111	3.63337
557552	NM_001044830,XM_021467659	zgc:153031	zgc:153031	protein_coding	NP_001038295.1;XP_021323334.1	ZDB-GENE-060929-1190	-25.7096	5.91657	2.95867e-77	7.32115e-75	2.46451	6.8737	193	4152	1.65007	38.9427	2.79596	60.4459
557553	NM_001044713,NM_001044713_dup1	si:dkey-12e7.1	si:dkey-12e7.1	protein_coding	NP_001038178.1	ZDB-GENE-050419-173	-2.49648	1.69144	3.425e-06	2.677e-05	1.49902	2.47627	78	163	0.684034	1.49358	1.15706	0.99906
557562	XM_680648	si:ch73-299h12.9	si:ch73-299h12.9	protein_coding	XP_685740.3	ZDB-GENE-081031-87	2.49501	1.88425	2.62265e-06	2.09583e-05	2.62646	1.6193	221	74	2.0217	0.70084	3.42567	1.08782
557565	NM_001044715,XM_009296247,XM_009296248,XM_009296249	nrd1b	nardilysin b (N-arginine dibasic convertase)	protein_coding	NP_001038180.2;XP_009294522.1;XP_009294523.1;XP_009294524.1	ZDB-GENE-050208-422	2.27515	6.3236	1.78337e-08	2.04055e-07	6.8097	5.63999	4748	1745	20.8347	7.98331	35.3033	12.3915
557566	XM_005170519,XM_680652	si:ch211-212d10.1	si:ch211-212d10.1, transcript variant X1	protein_coding	XP_005170576.1;XP_685744.4	ZDB-GENE-050208-355	2.22106	1.86031	3.45171e-05	0.000212528	2.56499	1.6836	210	79	1.10423	0.431554	1.87105	0.669846
557568	XM_680654	ankrd33aa	ankyrin repeat domain 33Aa	protein_coding	XP_685746.3	ZDB-GENE-080520-2	3.43402	2.65222	6.06376e-12	1.09008e-10	3.40929	1.92614	411	100	3.46038	0.873797	5.86343	1.35628
557570	XM_017358008,XM_021472225	si:dkeyp-41f9.3	si:dkeyp-41f9.3, transcript variant X2	protein_coding	XP_021327900.1	ZDB-GENE-091118-56	-7.76771	7.51941	1.07931e-40	9.08048e-39	5.42107	8.34902	1787	11608	4.87574	44.9839	8.26168	69.8227
557578	NM_001113582	anxa5a	annexin A5a	protein_coding	NP_001107054.1	ZDB-GENE-080220-29	5.32502	1.50038	9.37405e-14	1.99559e-12	2.4948	0.90158	198	31	2.54911	0.412833	4.31933	0.640788
557584	XM_021471896,XM_680670	clcn5b	chloride channel, voltage-sensitive 5b, transcript variant X1	protein_coding	XP_685762.2	ZDB-GENE-110407-11	2.51745	3.70869	7.11055e-09	8.78343e-08	4.29398	3.06918	795	264	2.09568	0.718208	3.55102	1.11478
557590	NM_001110024	zbtb43	zinc finger and BTB domain containing 43	protein_coding	NP_001103494.1	ZDB-GENE-060526-378	-6.78171	-2.09802	0.00961124	0.0288173	0.0660317	0.417967	2	12	0.019314	0.116848	0.032727	0.181369
557627	NM_001128692,NM_001128692_dup1	serpini1	serpin peptidase inhibitor, clade I (neuroserpin), member 1	protein_coding	NP_001122164.1	ZDB-GENE-060503-390	-3.49467	3.06106	2.11995e-13	4.37576e-12	2.23261	3.80092	158	462	1.24032	3.78589	0.356417	0.783057
557642	XM_003199252,XM_017357854,XM_021479046	slc4a10b	solute carrier family 4, sodium bicarbonate transporter, member 10b, transcript variant X2	protein_coding	XP_003199300.4;XP_017213343.1;XP_021334721.1	ZDB-GENE-081105-62	-2.8498	1.91682	5.93123e-08	6.28472e-07	1.55757	2.71033	83	198	0.308247	0.76207	0.52231	1.18286
557645	XM_005172218	sstr1b	somatostatin receptor 1b	protein_coding	XP_005172275.1	ZDB-GENE-120410-2	4.28917	-0.0554705	8.06982e-06	5.78502e-05	1.29386	0.417967	62	12	0.428196	0.083857	0.725556	0.13016
557648	NM_001101803	mapkapk2b	mitogen-activated protein kinase-activated protein kinase 2b	protein_coding	NP_001095273.1	ZDB-GENE-071018-1	3.72813	1.61193	3.94945e-10	5.72887e-09	2.51267	1.17643	201	45	2.44052	0.562674	4.13533	0.873367
557649	NM_001080171,NM_001080171_dup1	dcbld2	discoidin, CUB and LCCL domain containing 2	protein_coding	NP_001073640.2	ZDB-GENE-070112-1822	-2.21502	0.131632	0.00433438	0.0146662	0.727412	1.29642	28	52	0.14499	0.280161	0.199446	0.318791
557660	XM_017352596,XM_017352599,XM_021468620,XM_021468621,XM_021468622,XM_021468623	palld	palladin, cytoskeletal associated protein, transcript variant X2	protein_coding	XP_017208085.1;XP_017208088.1;XP_021324295.1;XP_021324296.1;XP_021324297.1;XP_021324298.1	ZDB-GENE-041014-252	-2.42677	6.30952	1.31147e-09	1.78423e-08	5.56289	6.82393	1976	4010	5.64178	11.7814	9.5597	18.2868
557661	NM_001037680	sox14	SRY (sex determining region Y)-box 14	protein_coding	NP_001032769.1	ZDB-GENE-051113-268	2.70552	-0.157809	0.00158739	0.00620585	1.14904	0.534119	52	16	0.418285	0.129593	0.708761	0.201151
557688	NM_001246660	rpgrip1l	RPGRIP1-like	protein_coding	NP_001233589.2	ZDB-GENE-081104-81	-2.62313	3.5379	2.06107e-09	2.72474e-08	2.88611	4.15171	273	599	1.05378	2.4088	1.78557	3.73887
557701	XM_009293439,XM_017352009,XM_017352012,XM_017352013,XM_017352014,XM_017352015,XM_017352016,XM_017352017,XM_021467754,XM_021467755,XM_021467756,XM_021473228,XM_021473229,XM_021473230,XM_021473231,XM_021474382,XM_021474383,XM_021474384,XM_021474385,XR_001796411,XR_002457507,XR_002457938	shank3a	SH3 and multiple ankyrin repeat domains 3a, transcript variant X1	protein_coding	XP_009291714.2;XP_017207498.1;XP_017207501.1;XP_017207502.1;XP_017207503.1;XP_017207504.1;XP_017207505.1;XP_017207506.1;XP_021323429.1;XP_021323430.1;XP_021323431.1	ZDB-GENE-060503-369	-4.76799	1.17726	1.3222e-11	2.26834e-10	0.825989	2.23158	33	132	0.074205	0.335085	0.125736	0.520111
557741	NM_001044839	si:dkey-14d8.6	si:dkey-14d8.6	protein_coding	NP_001038304.2	ZDB-GENE-041210-124	-17.4217	3.31614	4.64432e-47	4.8842e-45	1.05462	4.30877	46	672	1.077	16.5385	1.82491	25.6706
557752	NM_001312676,NM_001312677	rpgrb	retinitis pigmentosa GTPase regulator b	protein_coding	NP_001299605.1;NP_001299606.1	ZDB-GENE-081015-2	2.37892	5.96957	3.60088e-09	4.62094e-08	6.47801	5.24978	3764	1323	18.9383	6.80526	32.0899	10.5629
557757	XM_021480753,XM_680877	slc3a1	solute carrier family 3 (amino acid transporter heavy chain), member 1	protein_coding	XP_021336428.1	ZDB-GENE-090313-225	5.77574	-0.434155	3.45695e-06	2.69296e-05	1.1026	0.258248	49	7	0.263348	0.040989	0.44623	0.063622
557778	XM_680899	cilp2	cartilage intermediate layer protein 2	protein_coding	XP_685991.4	ZDB-GENE-050208-436	2.74277	2.29106	4.31729e-08	4.64955e-07	3.0129	1.83848	302	92	0.651234	0.205123	1.10348	0.318386
557791	NM_001327905,NM_001327905_dup1	ponzr6	plac8 onzin related protein 6	protein_coding	NP_001314834.1	ZDB-GENE-081104-326	2.58712	0.0293203	0.00131234	0.00526663	1.25192	0.615481	59	19	1.1444	0.379605	0.55129	0.589212
557792	XM_009292467	dennd3b	DENN/MADD domain containing 3b	protein_coding	XP_009290742.1	ZDB-GENE-091230-7	-4.80696	3.15953	1.31512e-19	4.47589e-18	2.02417	3.978	131	527	0.426259	1.78872	0.722273	2.7764
557798	NM_001328051,NM_001328051_dup1	mfap3l	microfibrillar-associated protein 3-like	protein_coding	NP_001314980.1	ZDB-GENE-111229-2	-2.85487	2.11174	2.22795e-08	2.50859e-07	1.68911	2.87908	95	227	0.711861	1.64072	1.04899	2.54668
557826	XM_680970	tmem145	transmembrane protein 145	protein_coding	XP_686062.6	ZDB-GENE-110411-84	2.3884	4.1396	2.10721e-08	2.38157e-07	4.68658	3.50606	1057	370	3.46019	1.26088	5.86312	1.95711
557869	XR_002458683	si:dkey-27n6.5	si:dkey-27n6.5	misc_RNA	.	ZDB-GENE-041014-44	-4.91608	-1.3523	0.000672116	0.00295621	0.159737	0.667279	5	21	0.072063	0.347941	0.122107	0.540064
557875	NM_001020774,NM_001020774_dup1,NM_001020774_dup2	smarcad1a	SWI/SNF-related, matrix-associated actin-dependent regulator of chromatin, subfamily a, containing DEAD/H box 1 a	protein_coding	NP_001018610.2	ZDB-GENE-050522-499	2.17059	4.21235	4.90243e-07	4.48512e-06	4.71644	3.66101	1080	416	4.59254	1.84092	2.37915	2.81731
557882	NM_001145688	si:dkeyp-80c12.7	si:dkeyp-80c12.7	protein_coding	NP_001139160.1	ZDB-GENE-090312-2	-4.3482	1.51099	6.97682e-12	1.2457e-10	1.03826	2.48352	45	164	0.541671	2.08815	0.917834	3.24117
557884	NM_001324527,NM_001324527_dup1,XM_021480115	slc16a8	solute carrier family 16 (monocarboxylate transporter), member 8	protein_coding	NP_001311456.1	ZDB-GENE-121128-1	3.53143	4.84274	2.67626e-16	7.19817e-15	5.51124	3.76867	1905	451	13.8245	3.40303	2.14168	0.838584
557919	NM_001079965,NM_001079965_dup1,XM_005162956,XM_005162957	adpgk	ADP-dependent glucokinase	protein_coding	NP_001073434.1;XP_005163013.1;XP_005163014.1	ZDB-GENE-061103-421	-2.16134	2.44403	1.42136e-05	9.60652e-05	2.14366	3.06918	146	264	0.870753	1.64922	0.770035	1.45078
557931	NM_001128693,XM_005166043,XM_005166044	tatdn2	TatD DNase domain containing 2	protein_coding	NP_001122165.1;XP_005166100.1;XP_005166101.1	ZDB-GENE-081022-51	-47.4502	1.2377	5.96512e-32	3.73406e-30	0.129173	2.48352	4	164	0.023216	1.05881	0.039338	1.64346
558007	NM_001099988	gltpa	glycolipid transfer protein a	protein_coding	NP_001093458.1	ZDB-GENE-060526-266	-3.53276	2.86827	3.90849e-13	7.91216e-12	2.07316	3.62544	137	405	1.45043	4.46155	2.45767	6.9251
558020	NM_001044852,XM_021475036	xpot	exportin, tRNA (nuclear export receptor for tRNAs)	protein_coding	NP_001038317.1;XP_021330711.1	ZDB-GENE-041210-4	-2.05524	6.70969	6.58663e-07	5.88016e-06	6.11881	7.14745	2925	5027	8.76386	16.013	14.8499	24.8549
558023	XM_005169393,XM_021479870,XM_699579	si:ch211-227n13.3	si:ch211-227n13.3, transcript variant X3	protein_coding	XP_005169450.1;XP_021335545.1;XP_704671.5	ZDB-GENE-141222-2	2.25614	0.809921	0.000627583	0.00277718	1.74057	1.02583	100	37	0.885923	0.308673	1.50115	0.479114
558050	XM_021472240,XM_021479314	si:ch211-127i16.2	si:ch211-127i16.2, transcript variant X1	protein_coding	XP_021334989.1	ZDB-GENE-091204-54	3.28391	0.202007	2.75569e-05	0.000173794	1.41283	0.588867	71	18	0.468056	0.1198	0.793096	0.18595
558083	XM_001919779,XM_021471625,XM_021476528,XR_002457020,XR_002458898	si:dkey-34e4.1	si:dkey-34e4.1, transcript variant X2	protein_coding	XP_001919814.3;XP_021332203.1	ZDB-GENE-070705-456	2.2962	1.06892	0.000247991	0.00122932	1.93863	1.15844	121	44	0.675346	0.24787	1.14434	0.384738
558091	XM_017357437,XM_681262	rnf220b	ring finger protein 220b, transcript variant X2	protein_coding	XP_017212926.1;XP_686354.5	ZDB-GENE-081104-195	2.32442	1.88738	1.2587e-05	8.60667e-05	2.60441	1.67097	217	78	1.24663	0.469264	2.11234	0.728378
558093	XM_009304783,XM_017357822,XM_017357823,XM_017357824,XM_017357825,XM_021478983,XR_001800294	impg2a	interphotoreceptor matrix proteoglycan 2a, transcript variant X1	protein_coding	XP_009303058.1;XP_017213311.1;XP_017213312.1;XP_017213313.1;XP_017213314.1;XP_021334658.1	ZDB-GENE-140106-217	2.47574	5.17919	1.3978e-09	1.89799e-08	5.7147	4.4467	2200	743	8.8038	3.07494	14.9176	4.77284
558117	XM_681301	trim45	tripartite motif containing 45	protein_coding	XP_686393.2	ZDB-GENE-070912-389	3.04666	-0.421156	0.00149235	0.00588336	1.02172	0.417967	44	12	0.26509	0.070416	0.449181	0.109298
558126	XM_009292354,XM_021466919,XM_021466920	erfl1	Ets2 repressor factor like 1, transcript variant X1	protein_coding	XP_009290629.1;XP_021322594.1;XP_021322595.1	ZDB-GENE-090529-3	2.75057	-0.418558	0.00349787	0.0122028	1.00498	0.447893	43	13	0.114131	0.035787	0.193389	0.055548
558132	NM_001144042,NM_001144042_dup1	si:dkey-12e7.4	si:dkey-12e7.4	protein_coding	NP_001137514.1	ZDB-GENE-050419-83	3.94489	1.8521	1.54586e-11	2.63699e-10	2.73192	1.27988	241	51	3.01134	0.653566	4.35619	0.441464
558134	XM_002665517	tmem222b	transmembrane protein 222b	protein_coding	XP_002665563.2	ZDB-GENE-090303-4	-2.61142	1.04758	1.73164e-05	0.000114533	1.08678	1.97833	48	105	0.384352	0.880366	0.651264	1.36648
558139	NM_001130598,XM_009294747,XM_009294748,XM_009294749,XM_009294750,XM_017352487,XM_017352488	sele	selectin E	protein_coding	NP_001124070.2;XP_009293022.1;XP_009293023.1;XP_009293024.1;XP_009293025.1;XP_017207976.1;XP_017207977.1	ZDB-GENE-041014-221	4.19107	1.80584	5.17032e-12	9.35059e-11	2.70627	1.21174	236	47	0.759212	0.157261	1.28645	0.244096
558149	XM_009297263,XM_021470259,XM_681334	adarb2	adenosine deaminase, RNA-specific, B2 (non-functional), transcript variant X1	protein_coding	XP_009295538.1;XP_021325934.1;XP_686426.5	ZDB-GENE-060503-160	2.69401	-0.0804648	0.0011292	0.00463152	1.19403	0.561752	55	17	0.226005	0.0709	0.382954	0.11005
558154	NM_001328597,NM_001328598,XM_005164518,XM_009299968,XR_660560	vegfab	vascular endothelial growth factor Ab	protein_coding	NP_001315526.1;NP_001315527.1;XP_005164575.1;XP_009298243.1	ZDB-GENE-030131-4605	2.30404	5.88061	1.32882e-08	1.5614e-07	6.37635	5.19458	3505	1272	14.4546	5.81583	24.4926	9.02718
558182	NM_001076559	igf2bp1	insulin-like growth factor 2 mRNA binding protein 1	protein_coding	NP_001070027.2	ZDB-GENE-060929-1258	16.8029	1.23384	7.41614e-23	3.07054e-21	2.40197	0.324272	183	9	0.354814	0.017326	0.601214	0.026893
558184	NM_001077545,XM_009301510	gfm2	G elongation factor, mitochondrial 2	protein_coding	NP_001071013.1;XP_009299785.1	ZDB-GENE-060201-3	2.14752	4.55821	4.80768e-07	4.40226e-06	5.0469	3.9933	1369	533	8.12792	3.24467	13.7723	5.03629
558239	XM_681430	si:ch211-113j14.1	si:ch211-113j14.1	protein_coding	XP_686522.4	ZDB-GENE-120215-110	-2.65808	1.6215	1.10719e-06	9.45113e-06	1.41283	2.43951	71	158	0.425473	0.994199	0.720941	1.54317
558275	NM_001045846,NM_001045846_dup1,NM_001326377,NM_001326377_dup1,XM_021466707	cdc42ep5	CDC42 effector protein (Rho GTPase binding) 5	protein_coding	NP_001039311.2;NP_001313306.1	ZDB-GENE-030131-5813	-2.31769	3.51313	1.59469e-07	1.56691e-06	2.97473	4.07947	293	568	1.58022	3.42767	1.57523	3.05544
558278	NM_001111157,XM_009294369	etaa1	ETAA1, ATR kinase activator	protein_coding	NP_001104627.1;XP_009292644.1	ZDB-GENE-080204-12	-3.74072	0.2665	3.38021e-06	2.64395e-05	0.577005	1.51007	21	66	0.104134	0.350551	0.176449	0.544116
558350	XM_005156219,XM_702004	eme1	essential meiotic structure-specific endonuclease 1, transcript variant X1	protein_coding	XP_005156276.1;XP_707096.1	ZDB-GENE-030131-3191	-2.77886	-0.044891	0.000645307	0.00284783	0.577005	1.24621	21	49	0.086838	0.214974	0.147142	0.333677
558389	NM_001110106,NM_001110106_dup1	crygm2f	crystallin, gamma M2f	protein_coding	NP_001103576.1	ZDB-GENE-080220-17	-69.4642	3.54445	6.61133e-72	1.40461e-69	0.409074	4.58442	14	821	0.3487	22.4967	0.590853	34.6108
558396	NM_001113337	cyp27c1	cytochrome P450, family 27, subfamily C, polypeptide 1	protein_coding	NP_001106808.2	ZDB-GENE-080204-68	2.90477	1.4312	6.53456e-07	5.83863e-06	2.29589	1.22908	167	48	0.986681	0.29158	1.67188	0.452582
558403	XM_681606	mutyh	mutY DNA glycosylase	protein_coding	XP_686698.2	ZDB-GENE-081104-193	2.13105	1.62841	0.000148073	0.000783504	2.35652	1.55201	176	69	1.22415	0.494582	2.07425	0.767676
558410	NM_001199726	ubiad1	UbiA prenyltransferase domain containing 1	protein_coding	NP_001186655.1	ZDB-GENE-030131-3205	2.13393	5.35481	3.0082e-07	2.85521e-06	5.8237	4.75869	2376	931	16.4821	6.72392	27.928	10.4367
558420	NM_001077601,NM_001077601_dup1	peli1b	pellino E3 ubiquitin protein ligase 1b	protein_coding	NP_001071069.2	ZDB-GENE-061027-372	-2.09408	2.09656	5.99449e-05	0.000350325	1.90294	2.75291	117	205	0.882126	1.60425	1.37606	2.47921
558431	XM_021468268,XM_681644	tcf19l	transcription factor 19 (SC1), like, transcript variant X1	protein_coding	XP_021323943.1;XP_686736.3	ZDB-GENE-060324-2	3.31841	-0.573345	0.000864433	0.00367231	0.953575	0.356184	40	10	0.173143	0.042429	0.293381	0.065858
558432	XM_681645	spred2a	sprouty-related, EVH1 domain containing 2a	protein_coding	XP_686737.2	ZDB-GENE-110830-2	2.14928	-0.760999	0.0335099	0.0806701	0.787362	0.417967	31	12	0.233944	0.090165	0.396406	0.139951
558437	NM_001089380	gpat2	glycerol-3-phosphate acyltransferase 2, mitochondrial	protein_coding	NP_001082849.1	ZDB-GENE-050309-118	-22.146	0.495081	9.76333e-19	3.11139e-17	0.159737	1.87198	5	95	0.022069	0.508719	0.037395	0.78962
558452	NM_001044861,NM_001044861_dup1	anpepa	alanyl (membrane) aminopeptidase a	protein_coding	NP_001038326.1	ZDB-GENE-030131-4781	-6.39513	1.24497	2.9297e-15	7.20707e-14	0.706862	2.33929	27	145	0.116322	0.672685	0.044227	0.156163
558461	NM_001048064,XM_017352790,XM_017352791,XM_017352793,XM_017352794,XM_017352796,XM_021468860,XM_021468861,XM_021468862	elnb	elastin b	protein_coding	NP_001041529.2;XP_017208279.1;XP_017208280.1;XP_017208282.1;XP_017208283.1;XP_017208285.1;XP_021324535.1;XP_021324536.1;XP_021324537.1	ZDB-GENE-061212-2	-2.33328	0.812632	0.000368005	0.00173938	1.02172	1.76906	44	86	0.098912	0.197687	0.167601	0.306843
558470	NM_001044863,NM_001044863_dup1	crygm2d5	crystallin, gamma M2d5	protein_coding	NP_001038328.1	ZDB-GENE-060918-4	18.3092	1.85938	5.58037e-30	3.23338e-28	2.94871	0.447893	287	13	8.61243	0.375639	10.8513	0.430642
558476	NM_001126477,NM_001126477_dup1,XM_005171885,XM_005171886,XM_021476190	stard8	StAR-related lipid transfer (START) domain containing 8	protein_coding	NP_001119949.1	ZDB-GENE-030131-9447	-3.80124	2.00832	8.71485e-12	1.5326e-10	1.41283	2.87358	71	226	0.22504	0.758024	0.16046	0.530972
558490	XM_681709	foxj2	forkhead box J2	protein_coding	XP_686801.4	ZDB-GENE-100922-240	-2.69846	3.38814	1.13716e-09	1.55514e-08	2.73192	4.02094	241	544	1.57113	3.68825	2.6622	5.7248
558500	NM_001110456,XM_005170040,XM_005170041	oxnad1	oxidoreductase NAD-binding domain containing 1	protein_coding	NP_001103926.1;XP_005170097.1;XP_005170098.1	ZDB-GENE-060503-199	-2.38934	1.64734	1.13085e-05	7.81379e-05	1.49902	2.42454	78	156	0.609658	1.17206	1.03303	1.81924
558501	NM_001044866,NM_001044866_dup1	crygm2d2	crystallin, gamma M2d2	protein_coding	NP_001038331.1	ZDB-GENE-060918-1	6.75626	3.0981	1.31176e-25	6.34259e-24	3.97965	1.67097	631	78	18.2735	2.33433	30.9634	3.62328
558511	NM_001327855	si:dkey-188i13.6	si:dkey-188i13.6	protein_coding	NP_001314784.1	ZDB-GENE-030131-7410	-2.189	3.38081	1.21589e-06	1.02954e-05	2.90878	3.9311	278	509	6.31184	12.0167	10.6951	18.6521
558540	XM_005162751,XM_017354006,XM_017354007,XM_017354008,XM_017354009,XM_017354010	mybl1	v-myb avian myeloblastosis viral oncogene homolog-like 1, transcript variant X1	protein_coding	XP_005162808.1;XP_017209495.1;XP_017209496.1;XP_017209497.1;XP_017209498.1;XP_017209499.1	ZDB-GENE-041111-281	5.8597	4.10322	1.58799e-26	8.04822e-25	4.91762	2.58126	1248	178	4.30376	0.636616	7.2925	0.988139
558546	XM_001919507,XM_009301606,XM_021471633,XM_021471634	rxfp2l	relaxin/insulin-like family peptide receptor 2, like, transcript variant X4	protein_coding	XP_021327308.1;XP_021327309.1	ZDB-GENE-060531-8	2.11138	0.628361	0.00290926	0.0104048	1.5916	0.965043	86	34	0.26998	0.107294	0.457467	0.166539
558551	XM_021477233,XM_681781	si:ch73-15b2.5	si:ch73-15b2.5, transcript variant X2	protein_coding	XP_021332908.1;XP_686873.2	ZDB-GENE-030131-5406	-2.65592	1.33301	3.8025e-06	2.93067e-05	1.23767	2.20554	58	129	0.469807	1.08118	0.796064	1.67818
558560	XM_021469635,XM_021469636	lcor	ligand dependent nuclear receptor corepressor, transcript variant X2	protein_coding	XP_021325310.1;XP_021325311.1	ZDB-GENE-061201-6	2.03087	0.0546037	0.01531	0.0424264	1.20872	0.717283	56	23	0.104974	0.04527	0.177874	0.070266
558563	XM_017352446,XM_021468255,XM_681794	abhd8a	abhydrolase domain containing 8a, transcript variant X3	protein_coding	XP_017207935.1;XP_021323930.1;XP_686886.5	ZDB-GENE-080204-70	-4.04527	0.284859	9.23913e-07	8.01677e-06	0.554179	1.53816	20	68	0.135463	0.483113	0.229534	0.749875
558570	XM_001920770	cenpi	centromere protein I	protein_coding	XP_001920805.1	ZDB-GENE-060810-127	-2.48848	0.554607	0.000233414	0.0011664	0.863608	1.60609	35	73	0.192738	0.427203	0.326585	0.663092
558601	NM_001326390	pipox	pipecolic acid oxidase	protein_coding	NP_001313319.1	ZDB-GENE-110627-2	-5.71883	1.25836	5.23557e-14	1.13878e-12	0.767654	2.33128	30	144	0.229608	1.16678	0.389059	1.81104
558615	NM_001044869	si:ch211-223m11.2	si:ch211-223m11.2	protein_coding	NP_001038334.2	ZDB-GENE-040724-123	-2.55655	0.581426	0.000147678	0.00078161	0.863608	1.63239	35	75	0.172773	0.388017	0.292755	0.602269
558616	NM_001099991	ccr6a	chemokine (C-C motif) receptor 6a	protein_coding	NP_001093461.1	ZDB-GENE-040625-126	2.34256	2.8448	5.70948e-07	5.17618e-06	3.45621	2.39412	426	152	5.35247	1.98628	9.06948	3.08305
558627	NM_001128695,XM_021470805,XM_021470807	tnnt1	troponin T type 1 (skeletal, slow)	protein_coding	NP_001122167.1;XP_021326480.1;XP_021326482.1	ZDB-GENE-080723-27	2.07413	4.91024	1.15799e-06	9.8289e-06	5.3746	4.35885	1729	697	18.3269	7.36534	31.0539	11.4323
558650	NM_001122699,NM_001122699_dup1,XM_005159107	pllp	plasmolipin	protein_coding	NP_001116171.1	ZDB-GENE-050419-195	-4.30694	0.0453211	1.07845e-06	9.23943e-06	0.459082	1.39188	16	58	0.191663	0.82212	0.160121	0.942447
558670	XM_681914	sh3bp5lb	SH3-binding domain protein 5-like, b	protein_coding	XP_687006.2	ZDB-GENE-060503-310	-3.98597	0.635347	6.74115e-08	7.06812e-07	0.686014	1.78086	26	87	0.114544	0.409506	0.19409	0.635624
558671	NM_001161340,XM_005163437,XM_005163438	myom1a	myomesin 1a (skelemin)	protein_coding	NP_001154812.1;XP_005163494.1;XP_005163495.1	ZDB-GENE-030131-2856	4.72759	1.68247	4.11479e-13	8.3058e-12	2.62646	1.06498	221	39	0.566625	0.102824	0.960117	0.1596
558673	XM_009298799,XM_017352228,XM_017352230,XM_021471287,XM_021471288,XM_021471289	camsap2b	calmodulin regulated spectrin-associated protein family, member 2b, transcript variant X6	protein_coding	XP_021326962.1;XP_021326963.1;XP_021326964.1	ZDB-GENE-070912-80	-2.00369	2.6388	5.51454e-05	0.000324531	2.35652	3.21118	176	295	0.529753	0.929901	0.897637	1.44337
558677	NM_001030120	zp3a.2	zona pellucida glycoprotein 3a, tandem duplicate 2	protein_coding	NP_001025291.1	ZDB-GENE-040727-2	-37.3734	4.82637	1.74636e-79	4.64951e-77	1.30757	5.81381	63	1973	0.679312	22.2609	1.15106	34.5527
558702	XM_003199188,XM_005167517,XM_021478862	ttll4	tubulin tyrosine ligase-like family, member 4, transcript variant X1	protein_coding	XP_003199236.1;XP_005167574.1;XP_021334537.1	ZDB-GENE-070912-313	-4.67109	5.79192	4.63487e-24	2.05493e-22	4.35963	6.52725	834	3258	3.30823	18.0867	5.60562	28.0737
558728	NM_001111158	pdp1	pyruvate dehyrogenase phosphatase catalytic subunit 1	protein_coding	NP_001104628.1	ZDB-GENE-060810-70	-2.35248	1.92797	7.4409e-06	5.38706e-05	1.69955	2.65367	96	189	0.718596	1.4655	1.21762	2.27471
558752	XM_682011	ppp2r2aa	protein phosphatase 2, regulatory subunit B, alpha a	protein_coding	XP_687103.5	ZDB-GENE-130530-565	-2.0413	0.999183	0.00156415	0.00613096	1.19403	1.8609	55	94	0.442596	0.794659	0.749955	1.23345
558759	XM_021479018,XM_021479019,XM_682018	adarb1b	adenosine deaminase, RNA-specific, B1b, transcript variant X1	protein_coding	XP_021334693.1;XP_021334694.1;XP_687110.6	ZDB-GENE-030219-15	-2.23304	1.92037	2.54599e-05	0.000161733	1.73042	2.62776	99	185	0.442488	0.9102	0.749772	1.41279
558764	NM_001013539	dhrs7ca	dehydrogenase/reductase (SDR family) member 7Ca	protein_coding	NP_001013557.2	ZDB-GENE-050320-114	4.76426	-1.07983	0.000819566	0.00351508	0.747673	0.189057	29	5	0.250174	0.036456	0.423907	0.056586
558776	XM_682043	knop1	lysine-rich nucleolar protein 1	protein_coding	XP_687135.1	ZDB-GENE-090313-76	2.05021	5.00448	1.56909e-06	1.30085e-05	5.4615	4.45961	1839	750	15.9912	6.78626	27.0962	10.5334
558790	XM_682056	sult3st1	sulfotransferase family 3, cytosolic sulfotransferase 1	protein_coding	XP_687148.1	ZDB-GENE-061207-52	-2.58748	1.35448	6.51772e-06	4.75964e-05	1.26604	2.21427	60	130	0.358125	0.808891	0.606824	1.25554
558820	XM_021466774,XM_021466775,XM_021466779	si:dkeyp-106c3.1	si:dkeyp-106c3.1, transcript variant X2	protein_coding	XP_021322449.1;XP_021322450.1;XP_021322454.1	ZDB-GENE-050411-73	8.52515	-0.416169	1.01354e-07	1.03284e-06	1.14904	0.189057	52	5	0.086086	0.007714	0.145869	0.011974
558833	NM_001320288,XM_017354369,XM_017354374,XM_021470820,XM_021470831,XM_021470832,XM_021470833,XM_021470835	spag9a	sperm associated antigen 9a	protein_coding	NP_001307217.1;XP_017209858.1;XP_017209863.1;XP_021326495.1;XP_021326506.1;XP_021326507.1;XP_021326508.1;XP_021326510.1	ZDB-GENE-070820-7	8.27645	2.36749	8.94384e-25	4.14352e-23	3.33088	1.06498	387	39	1.14435	0.119011	1.93904	0.184726
558848	XM_002665925,XM_005161121,XM_021469039	ulk1b	unc-51 like autophagy activating kinase 1, transcript variant X2	protein_coding	XP_002665971.2;XP_005161178.1;XP_021324714.1	ZDB-GENE-071203-2	-2.84986	3.68193	6.22859e-11	9.9776e-10	2.93552	4.31893	284	677	0.904666	2.2506	1.53291	3.49332
558865	XM_682139	wdr11	WD repeat domain 11	protein_coding	XP_687231.3	ZDB-GENE-081107-28	-2.1426	3.09368	3.89374e-06	2.99003e-05	2.68015	3.65461	231	414	0.862779	1.61583	1.46193	2.50804
558876	XM_005173369,XM_682152	LOC558876	E3 ubiquitin-protein ligase RNF14-like, transcript variant X2	protein_coding	XP_005173426.2;XP_687244.3	.	-3.93643	1.89952	4.68316e-12	8.543e-11	1.32116	2.78843	64	211	0.630795	2.17476	1.06885	3.3756
558883	NM_001030123,XM_009294751	tprb	translocated promoter region b, nuclear basket protein	protein_coding	NP_001025294.1;XP_009293026.1	ZDB-GENE-030131-6410	2.50966	6.13437	3.64939e-10	5.31931e-09	6.6634	5.35717	4286	1428	9.12876	3.1686	15.4682	4.91821
558926	NM_001113586	zgc:171490	zgc:171490	protein_coding	NP_001107058.1	ZDB-GENE-080204-29	-6.90721	-1.61559	0.00041343	0.00192106	0.0979478	0.588867	3	18	0.026614	0.191869	0.045097	0.297814
558958	XM_682251	lamc3	laminin, gamma 3	protein_coding	XP_687343.5	ZDB-GENE-060531-121	2.17427	3.38194	1.71258e-06	1.40981e-05	3.9251	2.91166	606	233	1.51968	0.606699	2.57501	0.941702
559054	NM_001079977,NM_001079977_dup1,XM_005165515	hmgcra	3-hydroxy-3-methylglutaryl-CoA reductase a	protein_coding	NP_001073446.2;XP_005165572.1	ZDB-GENE-040401-2	-2.63707	4.91158	1.32021e-10	2.0328e-09	4.13193	5.47902	706	1557	2.80105	6.43746	3.34772	2.97533
559062	XM_682369	si:dkey-175d9.2	si:dkey-175d9.2	protein_coding	XP_687461.6	ZDB-GENE-131119-97	-3.83389	1.42932	3.97006e-10	5.7548e-09	1.07079	2.38641	47	151	0.176122	0.589444	0.298429	0.91492
559069	NM_001089537,NM_001089537_dup1,XM_005157147,XM_009307730	tmco6	transmembrane and coiled-coil domains 6	protein_coding	NP_001083006.1;XP_005157204.1;XP_009306005.1	ZDB-GENE-070410-47	-2.959	2.75582	3.69599e-10	5.37977e-09	2.136	3.4664	145	359	1.25933	3.18317	1.21923	1.81353
559080	NM_001044883,NM_001044883_dup1	cftr	cystic fibrosis transmembrane conductance regulator (ATP-binding cassette sub-family C, member 7)	protein_coding	NP_001038348.1	ZDB-GENE-050517-20	-2.38503	0.2021	0.00130803	0.00525536	0.727412	1.36076	28	56	0.095563	0.200145	0.019585	0
559093	XM_017353990,XM_017353992,XM_017353993,XM_021473785,XM_021473786,XM_021473787,XM_021474555,XM_021474556	abcc13	ATP-binding cassette, sub-family C (CFTR/MRP), member 13, transcript variant X3	protein_coding	XP_017209479.1;XP_017209481.1;XP_017209482.1	ZDB-GENE-050517-26	5.94586	4.36537	1.16467e-27	6.09367e-26	5.17586	2.78843	1501	211	7.35896	0.95736	12.4694	1.48599
559122	NM_001199366,NM_001199366_dup1,XM_009296371	cfhl4	complement factor H like 4	protein_coding	NP_001186295.1;XP_009294646.1	ZDB-GENE-030131-251	-14.6856	2.09126	4.80338e-32	3.02484e-30	0.621602	3.16237	23	284	0.204748	2.73431	0.245906	4.24413
559127	NM_001098248	tmigd1	transmembrane and immunoglobulin domain containing 1	protein_coding	NP_001091718.1	ZDB-GENE-080303-6	-22.7784	1.63797	3.07821e-31	1.88758e-29	0.330654	2.79426	11	212	0.128995	2.8089	0.218575	4.3599
559138	NM_001130114	cmtm7	CKLF-like MARVEL transmembrane domain containing 7	protein_coding	NP_001123586.1	ZDB-GENE-041111-174	-7.19384	3.83046	5.80205e-31	3.47676e-29	2.15887	4.69773	148	891	1.93484	12.1576	3.27849	18.8706
559149	NM_001044888,NM_001044888_dup1	nudt14	nudix (nucleoside diphosphate linked moiety X)-type motif 14	protein_coding	NP_001038353.1	ZDB-GENE-041014-254	2.35637	-0.674918	0.0187538	0.0501397	0.844921	0.417967	34	12	0.71492	0.24862	0.600796	0.200601
559160	XM_700170	si:ch211-214j24.14	si:ch211-214j24.14	protein_coding	XP_705262.1	ZDB-GENE-110914-226	-5.00096	2.99426	1.00121e-19	3.45788e-18	1.86635	3.83245	113	473	1.84253	8.04788	3.12206	12.4917
559168	XM_682484	dok1a	docking protein 1a	protein_coding	XP_687576.4	ZDB-GENE-080721-2	-5.55755	2.23668	1.88295e-18	5.90226e-17	1.28002	3.16237	61	284	0.520498	2.55373	0.881957	3.96383
559276	XM_005173182,XM_005173183,XM_005173184,XM_005173188,XM_009291066,XM_017359122,XM_021481163,XM_021481164	ahnak	AHNAK nucleoprotein, transcript variant X1	protein_coding	XP_005173239.1;XP_005173240.1;XP_005173241.1;XP_005173245.1;XP_009289341.1;XP_017214611.1;XP_021336838.1;XP_021336839.1	ZDB-GENE-030131-8719	-2.09489	8.99247	2.57925e-07	2.47262e-06	8.36685	9.43145	14055	24621	10.5619	19.8393	17.8967	30.794
559288	XM_009296961,XM_021469991,XM_021469992,XM_021473712	c1ql4a	complement component 1, q subcomponent-like 4, transcript variant X2	protein_coding	XP_021325666.1;XP_021325667.1	ZDB-GENE-090313-185	2.36858	0.316025	0.00171283	0.00661391	1.41283	0.765611	71	25	0.322876	0.114507	0.547096	0.177734
559290	NM_001079677,NM_001079677_dup1,XM_005163017,XM_009297903	abhd2b	abhydrolase domain containing 2b	protein_coding	NP_001073145.1	ZDB-GENE-061027-74	2.40233	2.8608	2.7253e-07	2.59843e-06	3.48063	2.38641	434	151	3.15611	1.21216	4.3319	1.52667
559298	XM_682630	entpd2a.2	ectonucleoside triphosphate diphosphohydrolase 2a, tandem duplicate 2	protein_coding	XP_687722.1	ZDB-GENE-040724-67	-2.8778	0.438248	4.88043e-05	0.000291289	0.747673	1.56572	29	70	0.198216	0.504715	0.335866	0.783405
559308	XM_021481161,XM_682640	slc36a1	solute carrier family 36 (proton/amino acid symporter), member 1, transcript variant X2	protein_coding	XP_021336836.1;XP_687732.4	ZDB-GENE-061117-1	-2.21968	2.33657	8.89908e-06	6.32559e-05	2.04069	2.98493	133	247	0.557253	1.13889	0.944236	1.76775
559315	NM_001166330,XM_005165731	ptger1a	prostaglandin E receptor 1a (subtype EP1)	protein_coding	NP_001159802.1;XP_005165788.1	ZDB-GENE-120215-261	2.39801	-1.03034	0.0370978	0.0875636	0.686014	0.324272	26	9	0.18414	0.063325	0.312015	0.098291
559327	NM_001327750,NM_001327750_dup1,NM_001327750_dup2,NM_001327751,NM_001327751_dup1,NM_001327751_dup2,NM_001327752,NM_001327752_dup1,NM_001327752_dup2,XM_017354977	bnc2	basonuclin 2	protein_coding	NP_001314679.1;NP_001314680.1;NP_001314681.1;XP_017210466.1	ZDB-GENE-030131-5784	-2.90191	0.788652	9.11983e-06	6.46285e-05	0.900271	1.81571	37	90	0.106978	0.288489	0.181268	0.447786
559336	NM_001030129	zgc:114200	zgc:114200	protein_coding	NP_001025300.1	ZDB-GENE-050913-96	-2.45822	1.50129	1.03975e-05	7.24621e-05	1.38722	2.31513	69	142	0.606457	1.29222	1.02761	2.00574
559344	NM_001130772	zgc:195081	zgc:195081	protein_coding	NP_001124244.1	ZDB-GENE-081022-180	-5.03671	-0.173282	5.27277e-07	4.80721e-06	0.35727	1.27988	12	51	0.139543	0.625074	0.236448	0.970223
559349	NM_001110457,NM_001328011,XM_005173174,XM_021481025	klhl4	kelch-like family member 4	protein_coding	NP_001103927.2;NP_001314940.1;XP_005173231.1;XP_021336700.1	ZDB-GENE-070410-63	-2.31092	-0.510059	0.0112329	0.0326516	0.48345	0.944198	17	33	0.095495	0.190544	0.161811	0.295757
559380	NM_001033917	kbtbd12	kelch repeat and BTB (POZ) domain containing 12	protein_coding	NP_001029089.1	ZDB-GENE-050904-1	2.39558	0.623566	0.000578727	0.00258913	1.62484	0.90158	89	31	0.5767	0.20797	0.977188	0.322805
559395	XM_682733	slc7a10b	solute carrier family 7 (neutral amino acid transporter light chain, asc system), member 10b	protein_coding	XP_687825.2	ZDB-GENE-121105-2	7.26752	-0.368369	2.26803e-07	2.18924e-06	1.1642	0.224067	53	6	0.385898	0.045776	0.653884	0.071053
559398	NM_001100947	cdca5	cell division cycle associated 5	protein_coding	NP_001094417.1	ZDB-GENE-030131-235	2.77019	0.629883	4.63485e-05	0.000278127	1.668	0.835197	93	28	0.862123	0.269488	1.46082	0.418293
559419	NM_001328383	npas1	neuronal PAS domain protein 1	protein_coding	NP_001315312.1	ZDB-GENE-060503-934	2.49315	-0.734652	0.0155637	0.0429794	0.825989	0.387406	33	11	0.143444	0.050449	0.243058	0.078306
559420	NM_001110382	tlcd2	TLC domain containing 2	protein_coding	NP_001103852.1	ZDB-GENE-080204-81	-11.3862	1.1453	7.25634e-20	2.53105e-18	0.434294	2.33128	15	144	0.154938	1.59247	0.262535	2.47178
559444	NM_001044894	si:dkey-117n7.5	si:dkey-117n7.5	protein_coding	NP_001038359.1	ZDB-GENE-060503-331	4.59966	0.324932	1.2608e-07	1.26761e-06	1.55757	0.505946	83	15	1.25971	0.234269	2.13452	0.363626
559451	XM_682789	abtb2a	ankyrin repeat and BTB (POZ) domain containing 2a	protein_coding	XP_687881.4	ZDB-GENE-100422-13	-8.46594	2.85463	3.92692e-29	2.16784e-27	1.33462	3.79801	65	461	0.267771	2.00506	0.453724	3.1122
559454	NM_001302236	gpc5a	glypican 5a	protein_coding	NP_001289165.1	ZDB-GENE-140106-260	-2.90685	0.586395	2.92582e-05	0.00018326	0.806805	1.67097	32	78	0.296955	0.769033	0.503175	1.19367
559457	XM_002663426,XM_021479038	ccdc173	coiled-coil domain containing 173, transcript variant X2	protein_coding	XP_002663472.1;XP_021334713.1	ZDB-GENE-081104-457	3.34211	2.60792	2.10759e-11	3.52376e-10	3.36078	1.91547	396	99	3.20977	0.835738	5.43878	1.29721
559475	NM_001044897,NM_001044897_dup1,XM_009296387	vtg1	vitellogenin 1	protein_coding	NP_001038362.3;XP_009294662.1	ZDB-GENE-001201-1	-218.839	12.8891	3.81444e-176	2.67431e-172	6.12947	13.8826	2947	539307	10.3197	1968.69	17.4862	3055.74
559479	NM_001044898,XM_005164455,XM_017355028	frs2a	fibroblast growth factor receptor substrate 2a	protein_coding	NP_001038363.1;XP_005164512.1;XP_017210517.1	ZDB-GENE-060503-462	-6.4105	2.15534	3.17633e-20	1.14397e-18	1.13373	3.11653	51	274	0.299565	1.7521	0.507597	2.71957
559516	XM_009300310,XR_002458152,XR_002458153	col7a1l	collagen type VII alpha 1-like, transcript variant X1	protein_coding	XP_009298585.1	ZDB-GENE-030131-9861	32.5638	4.24346	6.92202e-68	1.29992e-65	5.23177	1.08416	1562	40	3.22799	0.081289	5.46966	0.126174
559540	NM_001270554	bmb	brambleberry	protein_coding	NP_001257483.1	ZDB-GENE-030131-5577	-2.88347	2.86954	6.38928e-10	8.99503e-09	2.24691	3.56186	160	386	1.15523	2.91231	1.95748	4.52041
559576	XM_017351827	cgref1	cell growth regulator with EF-hand domain 1	protein_coding	XP_017207316.1	ZDB-GENE-131121-137	-3.44125	3.86695	1.16738e-14	2.70711e-13	2.91775	4.55893	280	806	2.50039	7.50668	4.23679	11.6517
559590	XM_005162102,XM_021469926	nfascb	neurofascin homolog (chicken) b, transcript variant X2	protein_coding	XP_005162159.1;XP_021325601.1	ZDB-GENE-100519-2	-2.36109	1.74108	1.22871e-05	8.41255e-05	1.569	2.49789	84	166	0.288506	0.594151	0.488859	0.922226
559627	XM_005155277,XM_021472274,XM_021472275,XM_021472276,XM_021479348,XM_678531,XR_002457266,XR_002459600	slc7a1	solute carrier family 7 (cationic amino acid transporter, y+ system), member 1, transcript variant X1	protein_coding	XP_005155334.1;XP_021335023.1;XP_683623.4	ZDB-GENE-091116-69	-3.7001	0.0409868	1.29304e-05	8.82715e-05	0.507414	1.36076	18	56	0.069696	0.243167	0.118097	0.377437
559637	XM_005166154,XM_021477316,XM_683000	LOC559637	synaptotagmin-2-like, transcript variant X2	protein_coding	XP_005166211.1;XP_021332991.1;XP_688092.3	.	2.5743	-0.827574	0.0126641	0.0361565	0.787362	0.356184	31	10	0.251037	0.081176	0.425369	0.125999
559639	NM_001113797,NM_001113797_dup1,NM_001113797_dup2,XM_005156601	socs5b	suppressor of cytokine signaling 5b	protein_coding	NP_001107269.1	ZDB-GENE-080722-18	2.00852	0.497139	0.00731311	0.0229064	1.48701	0.923046	77	32	0.51623	0.175485	0.241469	0.126988
559657	NM_001144791,XM_005160724	fam129aa	family with sequence similarity 129, member Aa	protein_coding	NP_001138263.1;XP_005160781.1	ZDB-GENE-041014-181	-3.21833	4.14267	1.05426e-13	2.2353e-12	3.22647	4.80279	357	961	1.43024	3.84519	2.42346	5.9684
559665	NM_001161631	smc1a	structural maintenance of chromosomes 1A	protein_coding	NP_001155103.1	ZDB-GENE-090506-9	3.54958	0.359337	7.09985e-06	5.1529e-05	1.53443	0.615481	81	19	0.332453	0.079779	0.563325	0.123831
559686	XM_017353761,XM_683049	si:ch211-207e14.4	si:ch211-207e14.4, transcript variant X2	protein_coding	XP_017209250.1;XP_688141.3	ZDB-GENE-030131-3405	-2.56174	1.02813	2.57322e-05	0.000163216	1.08678	1.95768	48	103	0.256615	0.569875	0.434821	0.884544
559690	XM_009303563,XM_009303564,XM_021478014	zmp:0000000660	zmp:0000000660, transcript variant X3	protein_coding	XP_009301838.1;XP_009301839.1;XP_021333689.1	ZDB-GENE-130530-663	-4.94544	1.52893	1.50611e-13	3.15205e-12	0.970915	2.52622	41	170	0.110686	0.481415	0.187552	0.747239
559691	XM_009302778,XM_021477342	tgm8	transglutaminase 8, transcript variant X2	protein_coding	XP_009301053.1;XP_021333017.1	ZDB-GENE-120718-3	-4.22555	4.64333	3.12612e-20	1.12782e-18	3.39972	5.3709	408	1442	1.96712	7.21932	3.33318	11.2056
559693	XM_002667357	gabra6b	gamma-aminobutyric acid (GABA) A receptor, alpha 6b	protein_coding	XP_002667403.3	ZDB-GENE-080815-1	-2.82287	1.57993	3.14289e-07	2.97232e-06	1.34795	2.42454	66	156	0.307083	0.764744	0.520336	1.18701
559700	NM_001079979	zgc:153913	zgc:153913	protein_coding	NP_001073448.1	ZDB-GENE-061103-397	-4.0846	-0.013509	4.13172e-06	3.15435e-05	0.459082	1.34494	16	55	0.103363	0.388945	0.175142	0.60371
559742	NM_001127512,XM_005163910,XM_009299429	hmgxb4a	HMG box domain containing 4a	protein_coding	NP_001120984.1;XP_005163967.1;XP_009297704.1	ZDB-GENE-070912-675	4.72083	1.00165	2.1984e-10	3.29338e-09	2.06511	0.741649	136	24	0.78156	0.139934	1.32431	0.217202
559754	NM_001159512	tmprss13a	transmembrane protease, serine 13a	protein_coding	NP_001152984.1	ZDB-GENE-090309-3	4.43296	0.985835	9.42642e-10	1.30352e-08	2.04069	0.765611	133	25	1.05993	0.203454	1.796	0.315796
559762	XM_005166214,XM_683131	dnajc16	DnaJ (Hsp40) homolog, subfamily C, member 16, transcript variant X2	protein_coding	XP_005166271.1;XP_688223.4	ZDB-GENE-130530-683	-2.04332	-0.336641	0.0266086	0.0667372	0.577005	1.00585	21	36	0.108926	0.207902	0.18457	0.3227
559768	XM_017354785	zgc:173593	zgc:173593	protein_coding	XP_017210274.1	ZDB-GENE-071004-57	2.10443	-0.0355758	0.0105789	0.0310936	1.1642	0.667279	53	21	1.12017	0.443351	1.89806	0.688158
559771	NM_001114418,XM_021475040,XM_021475041	zgc:174704	zgc:174704	protein_coding	NP_001107890.1;XP_021330715.1;XP_021330716.1	ZDB-GENE-080218-5	2.08347	1.76166	0.000186934	0.000959205	2.45838	1.65822	192	77	1.27319	0.343363	2.15736	0.532958
559783	XM_005157747	si:ch211-207n23.2	si:ch211-207n23.2	protein_coding	XP_005157804.1	ZDB-GENE-131121-310	2.4396	4.81751	3.68574e-09	4.72121e-08	5.3541	4.1172	1704	584	37.2633	13.2965	63.1407	20.6384
559800	XM_683173	LOC559800	arylsulfatase J	protein_coding	XP_688265.3	.	-3.83178	1.93444	9.93309e-12	1.7338e-10	1.36116	2.81163	67	215	0.21489	0.727351	0.36412	1.12898
559801	NM_001130773	zgc:193811	zgc:193811	protein_coding	NP_001124245.2	ZDB-GENE-081022-43	-3.8671	0.235066	2.31194e-06	1.8674e-05	0.554179	1.49581	20	65	0.264713	0.920453	0.448543	1.4287
559805	NM_001034180,NM_001034180_dup1	tor2a	torsin family 2, member A	protein_coding	NP_001029352.1	ZDB-GENE-050913-60	-2.28427	0.471104	0.000899355	0.00379766	0.863608	1.52418	35	67	0.296356	0.59752	0.485191	0.927454
559806	XM_009302195,XM_683178	htr2ab	5-hydroxytryptamine (serotonin) receptor 2A, genome duplicate b, transcript variant X1	protein_coding	XP_009300470.1;XP_688270.2	ZDB-GENE-120215-60	2.67411	2.51891	4.18705e-08	4.51853e-07	3.20831	2.02871	352	110	1.63875	0.516932	2.77678	0.802368
559818	NM_001044907,XM_005170459	hapln4	hyaluronan and proteoglycan link protein 4	protein_coding	NP_001038372.1;XP_005170516.1	ZDB-GENE-060503-243	-2.54635	1.67449	2.93898e-06	2.32215e-05	1.47491	2.469	76	162	0.545929	1.21592	0.925048	1.88732
559843	XM_017351233,XM_683230	LOC559843	protein sel-1 homolog 3, transcript variant X2	protein_coding	XP_017206722.1;XP_688322.5	.	-2.96859	0.957191	3.16642e-06	2.49063e-05	0.970915	1.94724	41	102	0.179355	0.459501	0.303907	0.713226
559856	NM_001102671,NM_001102671_dup1,NM_001102671_dup2,XM_021469334	vtg7	vitellogenin 7	protein_coding	NP_001096141.1;XP_021325009.1	ZDB-GENE-001201-6	-157.406	8.50689	2.95275e-152	4.77732e-149	2.48276	9.49973	196	25816	0.721308	99.1871	1.22222	153.956
559897	NM_001079981	isoc1	isochorismatase domain containing 1	protein_coding	NP_001073450.1	ZDB-GENE-061020-1	-2.50529	1.94598	1.34924e-06	1.13333e-05	1.668	2.69169	93	195	0.604914	1.31741	1.025	2.04485
559906	NM_001044910,XM_021479182	si:ch211-243g18.2	si:ch211-243g18.2	protein_coding	NP_001038375.1;XP_021334857.1	ZDB-GENE-030131-2830	10.1138	0.418038	9.76429e-13	1.89808e-11	1.7202	0.291637	98	8	0.853765	0.064432	1.44666	0.100009
559907	XM_002663551,XM_009305329,XM_009305330,XM_009305331,XM_009305332,XM_009305333,XM_021479352,XM_021479353,XM_021479354,XM_021479355,XM_021479356,XM_021479357,XR_002457268,XR_002457269,XR_002459603,XR_002459604,XR_002459605,XR_662786	LOC559907	proto-oncogene DBL-like, transcript variant X3	protein_coding	XP_021335027.1;XP_021335028.1;XP_021335029.1;XP_021335030.1;XP_021335031.1;XP_021335032.1	.	2.15208	3.06451	4.20927e-06	3.20773e-05	3.62453	2.64724	484	188	1.2989	0.521012	2.20091	0.808701
559910	XM_683306	LOC559910	uncharacterized LOC559910	protein_coding	XP_688398.3	.	2.00996	-0.36276	0.0339197	0.0814606	0.970915	0.561752	41	17	0.208236	0.086846	0.352845	0.1348
559917	XM_009293256	msh4	mutS homolog 4	protein_coding	XP_009291531.1	ZDB-GENE-131121-643	3.84746	-0.290853	0.000111871	0.000611164	1.13373	0.387406	51	11	0.295153	0.065102	0.500122	0.10105
559931	NM_001044913,NM_001044913_dup1,NM_001044913_dup2,NM_001110384,NM_001110384_dup1,NM_001110384_dup2	vtg2	vitellogenin 2	protein_coding	NP_001038378.1;NP_001103854.1	ZDB-GENE-001201-2	-166.028	9.09762	3.8914e-157	7.44072e-154	2.91775	10.0903	280	38892	0.865015	125.552	1.46572	144.341
559954	NM_001110108	fn3krp	fructosamine 3 kinase related protein	protein_coding	NP_001103578.1	ZDB-GENE-041010-192	-3.68634	1.93291	3.4166e-11	5.6054e-10	1.38722	2.80007	69	213	0.973208	3.12781	1.64905	4.8549
559964	NM_001324496,NM_001324496_dup1,NM_001324496_dup2,XM_021478267	cacna1fb	calcium channel, voltage-dependent, L type, alpha 1F subunit	protein_coding	NP_001311425.1	ZDB-GENE-031104-1	2.18991	6.06367	8.3553e-08	8.63997e-07	6.53522	5.42268	3918	1496	7.86306	3.11973	3.37043	3.63409
559978	NM_001161350	grp	gastrin-releasing peptide	protein_coding	NP_001154822.1	ZDB-GENE-060526-117	2.03966	0.277741	0.00836984	0.025681	1.34795	0.812372	66	27	1.34313	0.56134	2.27586	0.871297
559987	XM_009299096,XM_021472627,XM_021472629,XM_021472631	si:ch211-106h11.1	si:ch211-106h11.1, transcript variant X1	protein_coding	XP_009297371.2	ZDB-GENE-061009-2	5.72845	0.157784	4.16326e-08	4.49748e-07	1.47491	0.387406	76	11	0.306997	0.043554	0.520191	0.067604
560003	XM_009300098,XM_017355255,XM_017355258,XM_017355259,XM_021471500,XM_021475209,XM_021475210,XM_021475211,XM_021475212,XM_021475213	erc1b	ELKS/RAB6-interacting/CAST family member 1b, transcript variant X5	protein_coding	XP_009298373.2;XP_017210744.2;XP_017210747.2;XP_017210748.2;XP_021330884.1;XP_021330885.1;XP_021330886.1;XP_021330887.1;XP_021330888.1	ZDB-GENE-041210-51	-9.85327	3.17824	1.95037e-34	1.31904e-32	1.41283	4.12185	71	586	0.320795	2.41012	0.543571	3.74093
560026	NM_001256637	dsg2.1	desmoglein 2, tandem duplicate 1	protein_coding	NP_001243566.1	ZDB-GENE-030131-7531	-2.60823	7.33538	4.23984e-11	6.89688e-10	6.49982	7.87306	3822	8336	14.6583	33.2925	24.8378	51.6757
560043	XM_683433	klf5b	Kruppel-like factor 5b	protein_coding	XP_688525.5	ZDB-GENE-080424-4	-6.07919	2.14492	2.51169e-19	8.34572e-18	1.1642	3.09777	53	270	0.315023	1.67311	0.53379	2.59696
560055	NM_001100437	crybb1l2	crystallin, beta B1, like 2	protein_coding	NP_001093907.1	ZDB-GENE-070822-18	-33.104	11.3496	3.08364e-96	1.40996e-93	7.26705	12.3069	6535	180903	82.6938	2383.7	140.12	3699.91
560066	XM_021469701,XM_021473502,XM_021474478	si:dkey-4c23.3	si:dkey-4c23.3	protein_coding	XP_021325376.1	ZDB-GENE-050208-668	-7.79261	0.562862	7.2954e-13	1.43005e-11	0.409074	1.83848	14	92	0.037481	0.289468	0.063511	0.449305
560091	NM_001287083	dsc2l	desmocollin 2 like	protein_coding	NP_001274012.1	ZDB-GENE-031116-55	-5.79022	6.61899	5.37283e-31	3.23802e-29	4.90415	7.39747	1236	5985	5.59239	28.1962	9.47601	43.7654
560100	NM_001039813,XM_005168628	adora2b	adenosine A2b receptor	protein_coding	NP_001034902.1;XP_005168685.1	ZDB-GENE-060511-1	-5.48491	0.832043	2.28727e-11	3.80904e-10	0.621602	1.98855	23	106	0.126998	0.634198	0.215191	0.984384
560140	NM_001025506,XM_021475042	adipor2	adiponectin receptor 2	protein_coding	NP_001020677.1;XP_021330717.1	ZDB-GENE-041210-60	-2.8793	6.12416	7.18752e-13	1.41153e-11	5.20729	6.70738	1535	3696	13.7614	34.3675	23.318	53.3442
560190	NM_001080576,XM_005158027	esrp1	epithelial splicing regulatory protein 1	protein_coding	NP_001074045.1;XP_005158084.1	ZDB-GENE-070112-1732	-2.55696	6.38357	1.3897e-10	2.1351e-09	5.58277	6.91881	2004	4285	8.51313	18.853	14.425	29.2631
560210	NM_001113589	hsp70l	heat shock cognate 70-kd protein, like	protein_coding	NP_001107061.1	ZDB-GENE-050321-1	-3.35421	6.72261	2.23459e-16	6.08022e-15	5.62924	7.35467	2071	5809	13.9289	40.6962	23.6018	63.1675
560219	NM_001110027,NM_001110027_dup1,NM_001110027_dup2	man2a1	mannosidase, alpha, class 2A, member 1	protein_coding	NP_001103497.2	ZDB-GENE-060526-31	-3.02551	-1.09446	0.00841274	0.0257824	0.275901	0.717283	9	23	0.142565	0.132602	0.127249	0.155284
560225	NM_001144792,XM_009303807,XM_009303808	cept1a	choline/ethanolamine phosphotransferase 1a	protein_coding	NP_001138264.1;XP_009302082.1;XP_009302083.1	ZDB-GENE-081105-47	2.81548	1.75904	2.55275e-07	2.44834e-06	2.55927	1.45219	209	62	1.82647	0.528599	3.09485	0.820477
560268	XM_003200631,XM_021473353,XR_002456135,XR_002457557	calcr	calcitonin receptor, transcript variant X1	protein_coding	XP_003200679.2	ZDB-GENE-060503-420	-3.72444	1.20283	3.0102e-09	3.8937e-08	0.970915	2.19675	41	128	0.180104	0.588591	0.305176	0.913594
560271	NM_001030137,NM_001030137_dup1,XM_021480584,XM_021480586,XM_021480588,XM_021480589,XM_021480591	si:rp71-1g18.13	si:rp71-1g18.13	protein_coding	NP_001025308.2	ZDB-GENE-040724-111	-2.79785	3.6825	1.31776e-10	2.03051e-09	2.95308	4.31284	288	674	1.6908	4.02821	1.89981	3.10007
560273	NM_001077150	oxct1b	3-oxoacid CoA transferase 1b	protein_coding	NP_001070618.1	ZDB-GENE-060929-212	-12.0744	1.48102	9.77303e-24	4.22087e-22	0.507414	2.61463	18	183	0.141853	1.53461	0.240363	2.38197
560283	NM_001025507	cax1	cation/H+ exchanger protein 1	protein_coding	NP_001020678.2	ZDB-GENE-030131-3044	-6.92922	0.314474	7.91513e-11	1.24797e-09	0.383405	1.64537	13	76	0.075726	0.473952	0.128314	0.735656
560308	XM_683705	serpinf2a	serpin peptidase inhibitor, clade F (alpha-2 antiplasmin, pigment epithelium derived factor), member 2a	protein_coding	XP_688797.1	ZDB-GENE-060822-1	-50.694	1.8965	2.35749e-41	2.02388e-39	0.189666	3.04979	6	260	0.048357	2.30885	0.081938	3.58373
560322	NM_001326402,XM_009304150	pdlim2	PDZ and LIM domain 2 (mystique)	protein_coding	NP_001313331.1;XP_009302425.1	ZDB-GENE-070308-4	-4.07476	6.46081	4.45607e-21	1.69484e-19	5.15799	7.15399	1482	5050	8.77636	31.0544	14.8711	48.2019
560334	NM_001114890,XM_005158513,XM_009293093	hhat	hedgehog acyltransferase	protein_coding	NP_001108362.2;XP_005158570.1;XP_009291368.1	ZDB-GENE-051118-1	-2.03223	0.00186278	0.0120505	0.0346776	0.706862	1.19419	27	46	0.23563	0.42105	0.399263	0.653542
560362	NM_001110458,NM_001110458_dup1	dis3l	DIS3 like exosome 3'-5' exoribonuclease	protein_coding	NP_001103928.1	ZDB-GENE-070209-95	-2.11749	3.11294	5.299e-06	3.95366e-05	2.70627	3.66738	236	418	1.03405	1.911	1.33977	1.22144
560369	XM_683774	si:dkey-118j18.1	si:dkey-118j18.1	protein_coding	XP_688866.2	ZDB-GENE-120709-89	2.23074	2.86927	2.22749e-06	1.80334e-05	3.45929	2.45433	427	160	5.58726	2.17415	9.46732	3.37466
560481	NM_001089479	hspa13	heat shock protein 70 family, member 13	protein_coding	NP_001082948.1	ZDB-GENE-070410-58	2.96875	2.68031	7.13072e-10	9.98538e-09	3.39008	2.06778	405	114	3.22827	0.93937	5.47013	1.45806
560482	XM_683887	rad54b	RAD54 homolog B (S. cerevisiae)	protein_coding	XP_688979.4	ZDB-GENE-060810-50	-2.66326	0.406809	0.000167219	0.000868423	0.767654	1.52418	30	67	0.137266	0.326791	0.232591	0.507236
560514	XM_683921	osbpl11	oxysterol binding protein-like 11	protein_coding	XP_689013.3	ZDB-GENE-081105-135	-3.2351	0.511538	6.0492e-06	4.46744e-05	0.727412	1.64537	28	76	0.132655	0.388236	0.224777	0.602609
560564	XM_021472872,XM_021474333,XM_683962	pdgfc	platelet derived growth factor c, transcript variant X2	protein_coding	XP_021328547.1	ZDB-GENE-071217-2	-4.29705	2.82781	2.34148e-16	6.33013e-15	1.87558	3.64172	114	410	0.687767	2.60721	1.16539	4.04684
560578	NM_001037683	tgfbr1a	transforming growth factor, beta receptor 1 a	protein_coding	NP_001032772.2	ZDB-GENE-051120-75	-2.03177	-0.626081	0.0443348	0.100975	0.48345	0.857666	17	29	0.118254	0.215396	0.200375	0.334331
560588	NM_001168267,XM_005163020,XM_009297904,XM_009297905,XM_009297906,XM_009297907	cep290	centrosomal protein 290	protein_coding	NP_001161739.1;XP_005163077.1;XP_009296179.1;XP_009296180.1;XP_009296181.1;XP_009296182.1	ZDB-GENE-041111-243	2.82792	7.87911	9.03983e-13	1.76377e-11	8.446	6.95377	14850	4391	26.6617	9.0296	45.1768	14.0155
560601	XM_021477930,XR_002459237	slc8b1	solute carrier family 8 (sodium/lithium/calcium exchanger), member B1, transcript variant X1	protein_coding	XP_021333605.1	ZDB-GENE-130530-900	-3.21382	0.0366479	8.67712e-05	0.000488114	0.554179	1.32895	20	54	0.252487	0.716462	0.427826	1.11207
560618	NM_001309475	lyve1a	lymphatic vessel endothelial hyaluronic receptor 1a	protein_coding	NP_001296404.1	ZDB-GENE-031118-138	3.47558	1.65394	2.31224e-09	3.03768e-08	2.53032	1.24621	204	49	2.5024	0.62289	4.24019	0.966834
560620	NM_001114419	hemk1	HemK methyltransferase family member 1	protein_coding	NP_001107891.1	ZDB-GENE-050208-185	2.53592	4.16556	2.18778e-09	2.88499e-08	4.73559	3.4737	1095	361	9.46838	3.24636	16.0437	5.03891
560647	XM_017351519,XM_021466936,XM_021466937	LOC560647	gamma-aminobutyric acid type B receptor subunit 2-like, transcript variant X3	protein_coding	XP_017207008.1;XP_021322611.1;XP_021322612.1	.	2.65834	1.36765	5.47316e-06	4.07783e-05	2.21816	1.24621	156	49	0.768782	0.250695	1.30266	0.389122
560649	XM_017351817	si:ch211-214p16.3	si:ch211-214p16.3	protein_coding	XP_017207306.2	ZDB-GENE-120709-93	-4.99338	1.60825	5.69598e-14	1.23636e-12	1.00498	2.5947	43	180	0.176605	0.772051	0.299248	1.19836
560651	NM_001044936,NM_001044936_dup1	ces3	carboxylesterase 3	protein_coding	NP_001038401.1	ZDB-GENE-030131-9563	-6.07943	0.530411	9.6108e-11	1.50517e-09	0.48345	1.78086	17	87	0.146336	0.800867	0.247959	1.24308
560657	XM_021468637	adam17b	ADAM metallopeptidase domain 17b	protein_coding	XP_021324312.1	ZDB-GENE-041001-199	-2.40698	1.41701	2.80764e-05	0.000176647	1.34795	2.24015	66	133	0.23192	0.492485	0.392976	0.764422
560682	NM_001044938	pycr3	pyrroline-5-carboxylate reductase 3	protein_coding	NP_001038403.1	ZDB-GENE-041014-244	-4.69958	-1.16946	0.000488104	0.00222986	0.189666	0.741649	6	24	0.044812	0.219693	0.075932	0.341002
560704	XR_001800887,XR_002459834	si:dkey-33c12.11	si:dkey-33c12.11	misc_RNA	.	ZDB-GENE-081028-29	2.27593	-0.413366	0.0156451	0.0431322	0.970915	0.505946	41	15	0.689301	0.245463	1.16798	0.381002
560711	XM_017352018,XM_017352019,XM_021473232,XM_021473233	si:ch211-220f12.4	si:ch211-220f12.4, transcript variant X2	protein_coding	XP_017207507.2;XP_017207508.2	ZDB-GENE-050419-200	-2.18843	2.82632	3.87278e-06	2.9757e-05	2.43982	3.41809	189	346	1.25763	2.34467	2.13099	3.63934
560719	XM_009294955	si:dkey-206f10.1	si:dkey-206f10.1	protein_coding	XP_009293230.1	ZDB-GENE-041014-154	3.3488	5.55352	1.02179e-15	2.61451e-14	6.19411	4.49587	3084	770	10.9324	2.83976	18.5244	4.40779
560722	NM_001025508	emp3b	epithelial membrane protein 3b	protein_coding	NP_001020679.1	ZDB-GENE-050913-51	9.1746	-0.616157	3.78178e-07	3.52737e-06	1.03826	0.153175	45	4	0.6294	0.058678	1.06648	0.091079
560759	NM_001128703,XM_005170249	otpa	orthopedia homeobox a	protein_coding	NP_001122175.1;XP_005170306.1	ZDB-GENE-070216-1	2.06524	3.44973	6.64428e-06	4.83896e-05	3.96674	3.01523	625	253	3.15388	1.32983	5.34408	2.06413
560764	NM_001030148,NM_001030148_dup1,XM_005155617,XM_005155618	paqr3b	progestin and adipoQ receptor family member IIIb	protein_coding	NP_001025319.2	ZDB-GENE-050913-128	-3.52743	2.48481	4.0999e-12	7.52471e-11	1.79025	3.27517	105	310	0.608968	1.8718	1.03187	1.63286
560765	XM_005172710,XM_684163	robo4	roundabout, axon guidance receptor, homolog 4 (Drosophila), transcript variant X2	protein_coding	XP_005172767.1;XP_689255.3	ZDB-GENE-020809-1	6.25763	0.489071	2.52312e-10	3.7531e-09	1.7202	0.447893	98	13	0.331885	0.043163	0.562362	0.066997
560768	NM_001083831,NM_001083831_dup1	neurl2	neuralized E3 ubiquitin protein ligase 2	protein_coding	NP_001077300.1	ZDB-GENE-070410-31	4.41652	-0.40586	3.24692e-05	0.000201097	1.08678	0.324272	48	9	0.343798	0.062803	0.582547	0.097481
560775	XM_005157847,XM_021472948	sall3a	spalt-like transcription factor 3a	protein_coding	XP_021328623.1	ZDB-GENE-020228-4	2.15653	1.32036	0.000293331	0.00143014	2.11275	1.34494	142	55	0.382545	0.152062	0.648204	0.236027
560780	NM_001099999	si:dkey-238o13.4	si:dkey-238o13.4	protein_coding	NP_001093469.1	ZDB-GENE-070705-403	2.1943	7.54984	5.28003e-08	5.62873e-07	8.01318	6.88605	10990	4188	141.605	56.1933	239.943	87.2217
560786	XM_021471306,XM_684184	ftr27	finTRIM family, member 27	protein_coding	XP_689276.1	ZDB-GENE-070912-318	-3.17804	0.441816	9.98688e-06	6.9855e-05	0.706862	1.59276	27	72	0.115783	0.332509	0.196188	0.516111
560806	NM_001173503,XM_021479185	grk5	G protein-coupled receptor kinase 5	protein_coding	NP_001166974.1;XP_021334860.1	ZDB-GENE-091204-274	3.0418	1.95086	1.59201e-08	1.8378e-07	2.7471	1.52418	244	67	1.64116	0.48481	2.78085	0.752508
560808	XM_684208	htr2aa	5-hydroxytryptamine (serotonin) receptor 2A, genome duplicate a	protein_coding	XP_689300.7	ZDB-GENE-070912-500	2.56346	-0.59384	0.00759456	0.0236262	0.900271	0.417967	37	12	0.227505	0.071756	0.385496	0.111378
560810	XM_005172086,XM_005172089,XM_021476982,XM_684210	trak2	trafficking protein, kinesin binding 2, transcript variant X2	protein_coding	XP_005172143.1;XP_005172146.1;XP_021332657.1;XP_689302.5	ZDB-GENE-030131-7496	-2.00952	3.05637	2.36011e-05	0.000150836	2.70109	3.59233	235	395	1.01538	1.79145	1.7205	2.78064
560840	XM_005160050,XM_005160051,XM_684239	pkn1a	protein kinase N1a, transcript variant X1	protein_coding	XP_005160107.3;XP_005160108.1;XP_689331.3	ZDB-GENE-061207-17	-2.69911	2.7168	1.04274e-08	1.2504e-07	2.18139	3.39906	151	341	0.586966	1.38106	0.994583	2.14364
560841	NM_001102568,NM_001102568_dup1,XR_002459564	antxr2b	anthrax toxin receptor 2b	protein_coding	NP_001096038.1	ZDB-GENE-080213-4	2.27615	0.659724	0.000957442	0.00400037	1.63575	0.944198	90	33	0.948758	0.35504	1.60762	0.551084
560860	NM_001100000,XM_021467666	wfdc1	WAP four-disulfide core domain 1	protein_coding	NP_001093470.1;XP_021323341.1	ZDB-GENE-070112-352	4.01326	0.342226	7.57792e-07	6.70254e-06	1.54605	0.561752	82	17	0.5436	0.105721	0.921101	0.164097
560863	XM_017354298,XM_021470613	LOC560863	GTPase IMAP family member 8-like, transcript variant X2	protein_coding	XP_017209787.1;XP_021326288.1	.	3.05989	2.26099	2.17544e-09	2.87231e-08	3.02124	1.73305	304	83	1.82488	0.517632	3.09216	0.803455
560869	XM_002666100	elf3	E74-like factor 3 (ets domain transcription factor, epithelial-specific)	protein_coding	XP_002666146.1	ZDB-GENE-030131-8760	4.01984	5.59604	5.86024e-20	2.06463e-18	6.29177	4.33903	3303	687	23.6821	5.12349	40.1281	7.95254
560875	XM_009299684,XM_009299685,XM_009299686,XM_021474706,XM_021474707	cacna1ha	calcium channel, voltage-dependent, T type, alpha 1H subunit a, transcript variant X2	protein_coding	XP_009297959.1;XP_009297960.1;XP_009297961.1;XP_021330381.1;XP_021330382.1	ZDB-GENE-130103-1	2.0302	3.11773	1.78995e-05	0.000117724	3.64897	2.74087	493	203	0.992726	0.430987	1.68212	0.668966
560911	NM_001089478,NM_001089478_dup1,XM_009307313	fam114a1	family with sequence similarity 114, member A1	protein_coding	NP_001082947.1	ZDB-GENE-070410-52	-2.02001	2.49193	6.1569e-05	0.000359218	2.23261	3.08355	158	267	1.00815	1.97161	0.730879	1.42921
560912	XM_021476353,XM_021476357	si:dkey-92j12.5	si:dkey-92j12.5, transcript variant X1	protein_coding	XP_021332028.1;XP_021332032.1	ZDB-GENE-090313-354	2.09487	4.56857	1.06822e-06	9.15932e-06	5.04588	4.02591	1368	546	3.14809	1.31259	5.33426	2.03736
560913	NM_001190306,XM_005160049	map2k7	mitogen-activated protein kinase kinase 7	protein_coding	NP_001177235.1;XP_005160106.1	ZDB-GENE-090312-186	-3.82079	0.476077	3.86468e-07	3.59195e-06	0.643394	1.65822	24	77	0.27828	0.95578	0.471533	1.48354
560917	XM_021472324,XM_021479519	LOC560917	serine protease HTRA2, mitochondrial-like, transcript variant X2	protein_coding	XP_021327999.1	.	2.24045	-0.61753	0.0339961	0.0815992	0.863608	0.447893	35	13	0.391624	0.141723	0.663587	0.219978
560941	XM_684341	si:ch211-74f19.2	si:ch211-74f19.2	protein_coding	XP_689433.5	ZDB-GENE-160114-78	-14.3979	1.13989	3.76172e-22	1.51282e-20	0.35727	2.34725	12	146	0.181831	2.42842	0.308102	3.76933
560945	XM_009296759,XM_021469927,XM_021469928	myh7bb	myosin, heavy chain 7B, cardiac muscle, beta b, transcript variant X3	protein_coding	XP_009295034.2;XP_021325602.1;XP_021325603.1	ZDB-GENE-090311-5	2.80586	0.111407	0.000341983	0.00163142	1.32116	0.615481	64	19	0.153091	0.04714	0.259404	0.07317
560947	XM_005162550,XM_005162551,XM_009297272,XM_009297273,XM_009297277,XM_021470269	si:ch211-271e10.1	si:ch211-271e10.1, transcript variant X1	protein_coding	XP_005162607.1;XP_005162608.1;XP_009295547.1;XP_009295548.1;XP_009295552.1;XP_021325944.1	ZDB-GENE-060526-145	2.07589	0.729487	0.00234956	0.00866987	1.65733	1.02583	92	37	0.471569	0.197768	0.79905	0.30697
561001	NM_001098249,NM_001098249_dup1	cd83	CD83 molecule	protein_coding	NP_001091719.1	ZDB-GENE-060503-762	-2.97747	0.0892201	0.000202378	0.00102991	0.599476	1.34494	22	55	0.253064	0.653051	0.428804	0.780899
561003	NM_001110029	kcng4a	potassium voltage-gated channel, subfamily G, member 4a	protein_coding	NP_001103499.1	ZDB-GENE-050419-11	-2.07291	3.32763	6.35725e-06	4.66058e-05	2.90878	3.85776	278	482	1.82639	3.29675	3.09473	5.11712
561006	NM_001044949,XM_005159438,XM_005159440,XM_017352251	daxx	death-domain associated protein	protein_coding	NP_001038414.1;XP_005159495.2;XP_005159497.1;XP_017207740.1	ZDB-GENE-010110-3	2.58262	4.3065	8.42188e-10	1.17232e-08	4.87911	3.58561	1214	393	4.14736	1.39693	7.02748	2.16828
561007	NM_001128704	pdk4	pyruvate dehydrogenase kinase, isozyme 4	protein_coding	NP_001122176.1	ZDB-GENE-060503-754	-2.1534	1.91351	4.62769e-05	0.000277859	1.75064	2.60802	101	182	0.597861	1.12159	1.01304	1.74091
561030	NM_001128705	pdxp	pyridoxal (pyridoxine, vitamin B6) phosphatase	protein_coding	NP_001122177.1	ZDB-GENE-080723-69	-36.7425	3.2911	1.2563e-59	1.91477e-57	0.599476	4.32499	22	680	0.337197	10.9539	0.571362	17.0023
561047	NM_001025511,XM_009305261	and3	actinodin3	protein_coding	NP_001020682.1;XP_009303536.1	ZDB-GENE-040724-185	4.37414	-0.150192	1.03465e-05	7.21309e-05	1.23767	0.387406	58	11	0.735749	0.13661	1.24669	0.212043
561073	NM_001128706,XM_009306307	zgc:194981	zgc:194981	protein_coding	NP_001122178.1;XP_009304582.1	ZDB-GENE-081022-170	-2.0432	3.12628	1.32092e-05	8.99702e-05	2.7471	3.6642	244	417	6.01947	10.5303	10.1997	16.3448
561077	XM_684477	fmn1	formin 1	protein_coding	XP_689569.3	ZDB-GENE-041001-198	3.72707	1.13365	1.44594e-08	1.68397e-07	2.12054	0.923046	143	32	0.407324	0.094677	0.69019	0.146956
561089	NM_001030152,NM_001030152_dup1	si:ch211-240l19.5	si:ch211-240l19.5	protein_coding	NP_001025323.2	ZDB-GENE-041210-327	-17.2403	3.63511	7.103e-50	8.07553e-48	1.23767	4.61277	58	838	0.816806	12.4895	0	0.137229
561123	NM_001126398,XM_021476206,XM_021476207	fam222ba	family with sequence similarity 222, member Ba	protein_coding	NP_001119870.1;XP_021331881.1;XP_021331882.1	ZDB-GENE-060526-355	-3.81903	6.68887	1.6716e-19	5.63442e-18	5.45304	7.36181	1828	5838	6.73013	22.495	11.4039	34.9162
561164	NM_001110225,XM_005171890,XM_021476208	kank1b	KN motif and ankyrin repeat domains 1b	protein_coding	NP_001103695.1;XP_005171947.1;XP_021331883.1	ZDB-GENE-060526-260	-2.23001	0.563066	0.00115065	0.0047103	0.918259	1.5793	38	71	0.132113	0.256345	0.223858	0.397892
561172	NM_001110110,XM_005166854,XM_005166856,XM_009303809	b3gnt3	UDP-GlcNAc:betaGal beta-1,3-N-acetylglucosaminyltransferase 3	protein_coding	NP_001103580.1;XP_005166911.1;XP_005166913.1;XP_009302084.1	ZDB-GENE-030131-8875	2.15957	2.18141	2.56428e-05	0.000162776	2.8302	1.93673	261	101	2.19983	0.86447	3.7275	1.34181
561195	NM_001126399,XM_005165327	trpv1	transient receptor potential cation channel, subfamily V, member 1	protein_coding	NP_001119871.1;XP_005165384.1	ZDB-GENE-030912-8	-2.5993	-0.0471425	0.00139798	0.00557416	0.599476	1.22908	22	48	0.090866	0.202454	0.153968	0.314244
561197	NM_001329864	ptprga	protein tyrosine phosphatase, receptor type, g a	protein_coding	NP_001316793.1	ZDB-GENE-101101-4	-2.96158	1.29133	5.34532e-07	4.86702e-06	1.14904	2.20554	52	129	0.187313	0.489215	0.317393	0.759347
561206	NM_001145575,NM_001290348	kcnk1b	potassium channel, subfamily K, member 1b	protein_coding	NP_001139047.1;NP_001277277.1	ZDB-GENE-090312-78	2.8371	-1.18826	0.0246357	0.0627619	0.643394	0.258248	24	7	0.296962	0.08679	0.503186	0.134714
561209	XM_009291200,XM_021472863,XM_021474309,XM_021474310,XM_021481221,XM_021481222	si:ch73-335m24.5	si:ch73-335m24.5, transcript variant X2	protein_coding	XP_021336896.1;XP_021336897.1	ZDB-GENE-100922-39	3.11892	1.91296	7.11177e-09	8.78343e-08	2.72172	1.48142	239	64	1.35461	0.374355	2.29532	0.581063
561215	NM_001077152,NM_001077152_dup1,XM_005158218,XR_002455720	gabpb2b	GA binding protein transcription factor, beta subunit 2b	protein_coding	NP_001070620.1	ZDB-GENE-050208-136	-3.6758	0.374137	1.1217e-06	9.54931e-06	0.621602	1.5793	23	71	0.216766	0.709685	0.185117	0.6318
561238	NM_001199767,XM_005158567,XM_021467190,XR_002455903	afg1la	AFG1 like ATPase a	protein_coding	NP_001186696.1;XP_005158624.1;XP_021322865.1	ZDB-GENE-091006-2	2.16401	4.86888	2.78437e-07	2.64994e-06	5.35327	4.27994	1703	658	14.8206	5.82587	25.1127	9.04276
561239	NM_001080578,XM_021470912,XM_021470913	engase	endo-beta-N-acetylglucosaminidase	protein_coding	NP_001074047.2;XP_021326587.1;XP_021326588.1	ZDB-GENE-070112-1332	-10.3088	4.69199	6.91888e-44	6.55517e-42	2.4767	5.58803	195	1682	1.15504	10.5097	1.95715	16.3129
561247	NM_001110835	shda	Src homology 2 domain containing transforming protein D, a	protein_coding	NP_001104305.1	ZDB-GENE-070912-58	-4.46536	-0.695672	8.39027e-05	0.000473625	0.275901	0.965043	9	34	0.08389	0.336863	0.142147	0.522869
561268	NM_001113590,XM_017357686,XM_021478693,XM_021478694	tnfsf13b	TNF superfamily member 13b	protein_coding	NP_001107062.1;XP_017213175.1;XP_021334368.1;XP_021334369.1	ZDB-GENE-080204-44	-3.25811	4.98817	8.53662e-15	2.02653e-13	3.99032	5.63024	636	1733	2.35257	6.73381	3.98631	10.452
561325	NM_001326449	LOC561325	thiosulfate sulfurtransferase/rhodanese-like domain-containing protein 1	protein_coding	NP_001313378.1	.	-3.71727	4.60474	2.77127e-17	8.02868e-16	3.49868	5.29678	440	1368	7.79879	25.2615	13.2146	39.2102
561333	NM_001037685	abhd13	abhydrolase domain containing 13	protein_coding	NP_001032774.1	ZDB-GENE-051120-54	-2.66648	0.583083	7.53536e-05	0.000431034	0.844921	1.64537	34	76	0.390852	0.913887	0.662279	1.41851
561350	XM_009294773,XM_009294774,XM_009294775,XR_002456230	ryr3	ryanodine receptor 3, transcript variant X3	protein_coding	XP_009293048.1;XP_009293049.1;XP_009293050.1	ZDB-GENE-041001-165	2.43957	4.5912	4.91204e-09	6.19394e-08	5.13318	3.90437	1456	499	1.42195	0.506708	2.40943	0.786498
561353	XM_005170201,XM_005170202,XM_021474437,XM_021474438	efr3bb	EFR3 homolog Bb (S. cerevisiae), transcript variant X1	protein_coding	XP_005170258.1;XP_005170259.1	ZDB-GENE-041014-293	-3.12733	0.867303	1.43125e-06	1.19743e-05	0.900271	1.89389	37	97	0.170572	0.476446	0.289025	0.739526
561391	NM_001044959	si:ch211-132b12.8	si:ch211-132b12.8	protein_coding	NP_001038424.1	ZDB-GENE-030131-5453	-3.99878	1.89491	2.86759e-12	5.347e-11	1.30757	2.78843	63	211	0.557943	1.95606	0.945406	3.03615
561410	NM_001077554,NM_001077554_dup1	tat	tyrosine aminotransferase	protein_coding	NP_001071022.1	ZDB-GENE-030131-1144	-44.7867	3.43305	1.10622e-64	1.90713e-62	0.554179	4.46693	20	754	0.15199	6.00546	0.25754	5.97886
561414	XM_684820	fam129ab	family with sequence similarity 129, member Ab	protein_coding	XP_689912.4	ZDB-GENE-070912-688	-2.05691	0.111392	0.0098652	0.0294183	0.747673	1.26314	29	50	0.127112	0.228071	0.215384	0.354006
561440	NM_001037686,NM_001037686_dup1,XM_009303070	ntn4	netrin 4	protein_coding	NP_001032775.1;XP_009301345.1	ZDB-GENE-050310-1	3.08159	5.53685	6.38887e-14	1.37823e-12	6.14959	4.56748	2989	811	14.8231	4.49824	12.4408	2.57359
561453	NM_001044961,NM_001044961_dup1	trim35-23	tripartite motif containing 35-23	protein_coding	NP_001038426.1	ZDB-GENE-060503-295	6.39943	-0.752311	1.76491e-05	0.000116331	0.936025	0.189057	39	5	0.373584	0.050551	0.633018	0.026611
561459	NM_001173504,NM_001173504_dup1,XM_005155696,XM_005155697,XM_005155698,XM_009305803,XM_017358237,XM_021479633,XM_021479634,XM_021479635,XM_021479636,XM_021479637	dazap1	DAZ associated protein 1	protein_coding	NP_001166975.1;XP_005155753.1;XP_005155754.1;XP_005155755.1;XP_009304078.1;XP_017213726.1;XP_021335308.1;XP_021335309.1;XP_021335310.1;XP_021335311.1;XP_021335312.1	ZDB-GENE-070212-1	2.03058	4.66197	2.69205e-06	2.14315e-05	5.12255	4.14259	1445	595	11.5624	5.02349	11.762	7.09609
561462	NM_001130623	cyp2k8	cytochrome P450, family 2, subfamily K, polypeptide 8	protein_coding	NP_001124095.1	ZDB-GENE-080721-19	7.57713	1.17049	1.61713e-15	4.04436e-14	2.27511	0.588867	164	18	1.2952	0.142851	2.19464	0.22173
561476	NM_001025514	zgc:112285	zgc:112285	protein_coding	NP_001020685.1	ZDB-GENE-050913-132	-43.5321	9.59392	2.5862e-107	1.7547e-104	5.15799	10.5621	1482	53952	12.2	462.6	20.6722	718.036
561486	XM_009293792,XM_009293793,XM_021473326,XM_021473327	cep126	centrosomal protein 126, transcript variant X3	protein_coding	XP_021329001.1;XP_021329002.1	ZDB-GENE-050419-24	2.09042	8.16274	2.95968e-07	2.81296e-06	8.60211	7.54235	16552	6621	54.291	22.5706	91.9933	35.0334
561525	NM_001079990,XM_005158117,XM_005158119,XM_005158120,XM_009292242,XM_009292244,XM_009292245	dync1i1	dynein, cytoplasmic 1, intermediate chain 1	protein_coding	NP_001073459.1;XP_005158174.1;XP_005158176.1;XP_005158177.1;XP_009290517.1;XP_009290519.1;XP_009290520.1	ZDB-GENE-061215-62	2.09632	5.52023	5.10103e-07	4.65466e-06	5.97852	4.93545	2650	1057	15.2517	6.40348	25.8431	9.93932
561565	XM_021476527,XM_684977	LOC561565	neuropeptide FF receptor 2	protein_coding	XP_690069.6	.	4.52462	-0.112458	5.20702e-06	3.88917e-05	1.26604	0.387406	60	11	0.194336	0.036964	0.329293	0.057373
561624	NM_001045374	snx22	sorting nexin 22	protein_coding	NP_001038839.2	ZDB-GENE-060825-154	-3.61351	2.76196	3.14045e-13	6.3943e-12	1.97346	3.53423	125	378	1.81019	5.70332	3.06727	8.85254
[truncated: 2,864 more rows]
